# Supplementary material for: l-Theanine attenuates heat stress-induced proteotoxicity and alterations in carbohydrate and lipid metabolismviaheat shock factor 1
Source: Royal Society of Chemistry journal article supplement (doi:10.1039/d3fo01001e), 2023-01-01
Supplement: d3fo01001e1.xlsx [file d3fo01001e1.xlsx]

## Sheet: DEGs (HS vs. Control)
Differentially expressed genes (DEGs) screened from HS vs. Control(Screening criteria: |log2FC| ≥ 1, p < 0.05)
gene_id	gene_name	transcript_id	GO	KEGG	KO_ENTRY	EC	Description	trans_type	FPKM.HS_1	FPKM.HS_2	FPKM.HS_3	FPKM.Control_1	FPKM.Control_2	FPKM.Control_3	fc	log2(fc)	pval	qval	regulation	significant
ENSRNOG00000030864	AABR07043031	ENSRNOT00000050750	NA	NA	NA	NA		processed_pseudogene	0.0001	0.0001	0.0001	2.59634	3.38918	3.08546	3.30725e-05	-14.884	4.90019e-42	5.8572e-38	down	yes
ENSRNOG00000034190	Ighm	ENSRNOT00000006888;ENSRNOT00000056845;ENSRNOT00000048378;ENSRNOT00000084892;ENSRNOT00000085678;ENSRNOT00000082921;ENSRNOT00000040702;ENSRNOT00000066209;ENSRNOT00000081908;ENSRNOT00000006912	GO:0002250(adaptive immune response);GO:0003697(single-stranded DNA binding);GO:0003823(antigen binding);GO:0005615(extracellular space);GO:0006910(phagocytosis, recognition);GO:0006911(phagocytosis, engulfment);GO:0006958(complement activation, classical pathway);GO:0009897(external side of plasma membrane);GO:0009986(cell surface);GO:0016020(membrane);GO:0016021(integral component of membrane);…	NA	NA	NA	immunoglobulin heavy constant mu [Source:MGI Symbol;Acc:MGI:96448]	protein_coding	1.2628	1.45902	1.20437	3.84974	4.14631	4.6239	0.31111	-1.6845	4.22731e-16	2.52645e-12	down	yes
ENSRNOG00000050963	AABR07064716	ENSRNOT00000075744	NA	NA	NA	NA		miRNA	0.136953	0.154616	0.176333	13.2558	15.7154	13.8412	0.0109291	-6.51568	1.87284e-15	7.46203e-12	down	yes
ENSRNOG00000000172	Sqor	ENSRNOT00000068129;ENSRNOT00000089204	GO:0005739(mitochondrion);GO:0005743(mitochondrial inner membrane);GO:0016491(oxidoreductase activity);GO:0055114(oxidation-reduction process);GO:0070221(sulfide oxidation, using sulfide:quinone oxidoreductase);GO:0070224(sulfide:quinone oxidoreductase activity);GO:0070813(hydrogen sulfide metabolic process);GO:0071949(FAD binding);GO:0071949(FAD binding)	00920(Sulfur metabolism);00920(Sulfur metabolism)	K22470	EC:1.8.5.8	sulfide quinone oxidoreductase [Source:RGD Symbol;Acc:1564504]	protein_coding	47.2487	78.135	78.9676	20.3753	15.6087	15.9908	3.93174	1.97517	9.27533e-15	2.7717e-11	up	yes
ENSRNOG00000003977	Dusp1	ENSRNOT00000005383	GO:0000188(inactivation of MAPK activity);GO:0001706(endoderm formation);GO:0004721(phosphoprotein phosphatase activity);GO:0004722(protein serine/threonine phosphatase activity);GO:0004725(protein tyrosine phosphatase activity);GO:0005634(nucleus);GO:0005737(cytoplasm);GO:0006470(protein dephosphorylation);GO:0007049(cell cycle);GO:0007162(negative regulation of cell adhesion);GO:0008138(protein…	04010(MAPK signaling pathway);04726(Serotonergic synapse);05418(Fluid shear stress and atherosclerosis)	K21278	3.1.3.48;EC:3.1.3.16	dual specificity phosphatase 1 [Source:RGD Symbol;Acc:620897]	protein_coding	48.0822	78.7994	76.1666	138.252	234.524	218.662	0.343313	-1.5424	9.28185e-11	1.87776e-07	down	yes
ENSRNOG00000047876	LOC689986	ENSRNOT00000080452;ENSRNOT00000002824	NA	NA	NA	NA	RIKEN cDNA 1700028K03 gene [Source:MGI Symbol;Acc:MGI:1923671]	protein_coding	0.417961	0.374653	0.0317477	0.0001	0.0001	0.0001	2747.87	11.4241	9.42571e-11	1.87776e-07	up	yes
ENSRNOG00000045686	Nfs1	ENSRNOT00000072945	GO:0003824(catalytic activity);GO:0030170(pyridoxal phosphate binding);GO:0031071(cysteine desulfurase activity);GO:0044571([2Fe-2S] cluster assembly);GO:0046872(metal ion binding);GO:0051536(iron-sulfur cluster binding)	00730(Thiamine metabolism);04122(Sulfur relay system)	K04487	EC:2.8.1.7	NFS1 cysteine desulfurase [Source:RGD Symbol;Acc:620912]	protein_coding	0.0001	0.0001	0.0001	0.0001	30.941	30.1139	4.91361e-06	-17.6348	1.53485e-09	2.62086e-06	down	yes
ENSRNOG00000051193	AABR07010030	ENSRNOT00000076198	NA	NA	NA	NA		processed_pseudogene	0.358718	0.305378	0.20413	3.38236	1.59619	1.74645	0.129104	-2.95339	2.53459e-09	3.78699e-06	down	yes
ENSRNOG00000049829	AABR07060872	ENSRNOT00000031991;ENSRNOT00000074175;ENSRNOT00000086911;ENSRNOT00000042165	GO:0002377(immunoglobulin production);GO:0005615(extracellular space);GO:0006955(immune response);GO:0006955(immune response)	NA	NA	NA		protein_coding	9.62576	14.3645	5.72868	35.0978	29.3579	26.9278	0.325211	-1.62055	7.39691e-09	9.82392e-06	down	yes
ENSRNOG00000020636	Spint2	ENSRNOT00000046611;ENSRNOT00000028006	GO:0001843(neural tube closure);GO:0004867(serine-type endopeptidase inhibitor activity);GO:0005737(cytoplasm);GO:0005886(plasma membrane);GO:0006508(proteolysis);GO:0007163(establishment or maintenance of cell polarity);GO:0008233(peptidase activity);GO:0010951(negative regulation of endopeptidase activity);GO:0016020(membrane);GO:0016021(integral component of membrane);GO:0022408(negative regul…	NA	NA	NA	serine peptidase inhibitor, Kunitz type, 2 [Source:RGD Symbol;Acc:735123]	protein_coding	22.448	23.4262	22.0995	50.3283	52.2977	42.014	0.469951	-1.08942	9.06853e-09	1.08396e-05	down	yes
ENSRNOG00000055020	AABR07038948	ENSRNOT00000092230	NA	NA	NA	NA		processed_pseudogene	2.12668	2.70974	2.48262	11.7754	5.31054	8.70291	0.283806	-1.81702	1.23914e-08	1.34649e-05	down	yes
ENSRNOG00000058068	Obscn	ENSRNOT00000087926;ENSRNOT00000078353;ENSRNOT00000084697	GO:0000166(nucleotide binding);GO:0004672(protein kinase activity);GO:0004674(protein serine/threonine kinase activity);GO:0005085(guanyl-nucleotide exchange factor activity);GO:0005089(Rho guanyl-nucleotide exchange factor activity);GO:0005515(protein binding);GO:0005524(ATP binding);GO:0005546(phosphatidylinositol-4,5-bisphosphate binding);GO:0005547(phosphatidylinositol-3,4,5-trisphosphate bin…	NA	K17531	EC:2.7.11.1	obscurin, cytoskeletal calmodulin and titin-interacting RhoGEF [Source:RGD Symbol;Acc:631335]	protein_coding	0.0987526	0.0548799	0.0356755	0.00530234	0.00748298	0.00507208	10.6011	3.40614	3.11254e-08	2.93955e-05	up	yes
ENSRNOG00000003666	Jchain	ENSRNOT00000004866	GO:0002250(adaptive immune response);GO:0003094(glomerular filtration);GO:0003697(single-stranded DNA binding);GO:0005615(extracellular space);GO:0006959(humoral immune response);GO:0019731(antibacterial humoral response);GO:0019862(IgA binding);GO:0030674(protein-macromolecule adaptor activity);GO:0031210(phosphatidylcholine binding);GO:0034987(immunoglobulin receptor binding);GO:0042803(protein…	NA	NA	NA	joining chain of multimeric IgA and IgM [Source:RGD Symbol;Acc:1310155]	protein_coding	2.86113	5.33566	3.20687	13.3365	12.6685	14.1773	0.283798	-1.81706	3.19704e-08	2.93955e-05	down	yes
ENSRNOG00000049851	Fmo6	ENSRNOT00000072922	GO:0004497(monooxygenase activity);GO:0004499(N,N-dimethylaniline monooxygenase activity);GO:0005783(endoplasmic reticulum);GO:0005789(endoplasmic reticulum membrane);GO:0016020(membrane);GO:0016021(integral component of membrane);GO:0016491(oxidoreductase activity);GO:0031090(organelle membrane);GO:0043231(intracellular membrane-bounded organelle);GO:0050660(flavin adenine dinucleotide binding);…	00982(Drug metabolism - cytochrome P450)	K00485	EC:1.14.13.8	flavin containing monooxygenase 6 [Source:RGD Symbol;Acc:1559491]	protein_coding	1.88215	1.80454	0.0001	0.0001	0.0001	0.0001	12289.3	13.5851	1.0561e-07	9.01685e-05	up	yes
ENSRNOG00000009514	Mme	ENSRNOT00000088565;ENSRNOT00000042576	GO:0001786(phosphatidylserine binding);GO:0001822(kidney development);GO:0001890(placenta development);GO:0004175(endopeptidase activity);GO:0004222(metalloendopeptidase activity);GO:0005737(cytoplasm);GO:0005769(early endosome);GO:0005802(trans-Golgi network);GO:0005886(plasma membrane);GO:0005903(brush border);GO:0006508(proteolysis);GO:0006518(peptide metabolic process);GO:0007568(aging);GO:00…	04614(Renin-angiotensin system);04640(Hematopoietic cell lineage);04974(Protein digestion and absorption);05010(Alzheimer disease);05010(Alzheimer disease)	NA	NA	membrane metallo-endopeptidase [Source:RGD Symbol;Acc:3098]	protein_coding	0.111499	0.123298	0.0847244	0.419944	0.457033	4.3914	0.060649	-4.04337	3.22088e-07	0.000256661	down	yes
ENSRNOG00000047790	LOC108348055	ENSRNOT00000075073;ENSRNOT00000084944	GO:0001701(in utero embryonic development);GO:0001944(vasculature development);GO:0005737(cytoplasm);GO:0005813(centrosome);GO:0005856(cytoskeleton);GO:0007224(smoothened signaling pathway);GO:0008158(hedgehog receptor activity);GO:0016020(membrane);GO:0030030(cell projection organization);GO:0032880(regulation of protein localization);GO:0035869(ciliary transition zone);GO:0036038(MKS complex);G…	NA	K16744	NA	B9 domain-containing protein 1 [Source:RGD Symbol;Acc:11475921]	protein_coding	0.0001	0.0001	0.0001	1.59769	2.2396	0.0001	7.81782e-05	-13.6429	4.08292e-07	0.000300903	down	yes
ENSRNOG00000051433	LOC103692167	ENSRNOT00000089635	GO:0000122(negative regulation of transcription by RNA polymerase II);GO:0005634(nucleus);GO:0006342(chromatin silencing);GO:0035102(PRC1 complex);GO:0036353(histone H2A-K119 monoubiquitination);GO:0046872(metal ion binding);GO:1990841(promoter-specific chromatin binding)	04550(Signaling pathways regulating pluripotency of stem cells)	K11487	NA	polycomb group RING finger protein 1 [Source:RGD Symbol;Acc:9188290]	protein_coding	0.0001	0.0001	0.0001	1.35486	1.65339	0.0001	9.97226e-05	-13.2917	4.44149e-07	0.000300903	down	yes
ENSRNOG00000003054	AABR07037009	ENSRNOT00000004187	GO:0005515(protein binding)	NA	K06103	EC:2.7.11.1	peripheral plasma membrane protein CASK-like [Source:NCBI gene;Acc:100910506]	protein_coding	0.0001	0.0001	0.0001	3.56416	1.04549	0.0001	6.50795e-05	-13.9074	4.5313e-07	0.000300903	down	yes
ENSRNOG00000048402	Igh-6	ENSRNOT00000045874	GO:0003823(antigen binding);GO:0006910(phagocytosis, recognition);GO:0006911(phagocytosis, engulfment);GO:0006958(complement activation, classical pathway);GO:0009897(external side of plasma membrane);GO:0034987(immunoglobulin receptor binding);GO:0042571(immunoglobulin complex, circulating);GO:0042742(defense response to bacterium);GO:0045087(innate immune response);GO:0050853(B cell receptor si…	NA	NA	NA	immunoglobulin heavy chain 6 [Source:RGD Symbol;Acc:1359202]	protein_coding	3.37959	4.98785	2.01228	20.2651	10.8194	7.44969	0.269364	-1.89237	6.76905e-07	0.000409784	down	yes
ENSRNOG00000046020	AC115277	ENSRNOT00000054630	NA	NA	NA	NA		miRNA	0.080792	0.034048	0.3168	28.8783	44.1101	0.080732	0.00590728	-7.40329	6.85659e-07	0.000409784	down	yes
ENSRNOG00000031700	Map3k5	ENSRNOT00000051496;ENSRNOT00000067070	GO:0000165(MAPK cascade);GO:0000166(nucleotide binding);GO:0000186(activation of MAPKK activity);GO:0000187(activation of MAPK activity);GO:0000287(magnesium ion binding);GO:0001934(positive regulation of protein phosphorylation);GO:0002931(response to ischemia);GO:0004672(protein kinase activity);GO:0004674(protein serine/threonine kinase activity);GO:0004709(MAP kinase kinase kinase activity);G…	01524(Platinum drug resistance);04010(MAPK signaling pathway);04071(Sphingolipid signaling pathway);04141(Protein processing in endoplasmic reticulum);04210(Apoptosis);04530(Tight junction);04668(TNF signaling pathway);04714(Thermogenesis);04722(Neurotrophin signaling pathway);04932(Non-alcoholic fatty liver disease (NAFLD));05014(Amyotrophic lateral sclerosis (ALS));05418(Fluid shear stress and …	K04426	EC:2.7.11.25	mitogen-activated protein kinase kinase kinase 5 [Source:RGD Symbol;Acc:1306565]	protein_coding	3.53184	3.27313	3.6635	0.771334	1.55348	1.50527	2.73322	1.4506	1.11336e-06	0.000633715	up	yes
ENSRNOG00000008946	AABR07059171	ENSRNOT00000011839	NA	NA	NA	NA		processed_pseudogene	6.515	6.80704	8.99778	1.72377	2.42466	2.37	3.42411	1.77573	3.95034e-06	0.00214629	up	yes
ENSRNOG00000053452	LOC100361457	ENSRNOT00000079310	GO:0000166(nucleotide binding);GO:0001525(angiogenesis);GO:0001738(morphogenesis of a polarized epithelium);GO:0003674(molecular_function);GO:0005200(structural constituent of cytoskeleton);GO:0005522(profilin binding);GO:0005524(ATP binding);GO:0005737(cytoplasm);GO:0005829(cytosol);GO:0005856(cytoskeleton);GO:0005884(actin filament);GO:0005886(plasma membrane);GO:0005911(cell-cell junction);GO:…	04015(Rap1 signaling pathway);04145(Phagosome);04210(Apoptosis);04390(Hippo signaling pathway);04510(Focal adhesion);04520(Adherens junction);04530(Tight junction);04611(Platelet activation);04670(Leukocyte transendothelial migration);04714(Thermogenesis);04810(Regulation of actin cytoskeleton);04919(Thyroid hormone signaling pathway);04921(Oxytocin signaling pathway);05100(Bacterial invasion of …	K05692	NA	actin, gamma 1 propeptide-like [Source:RGD Symbol;Acc:2320108]	protein_coding	16.4524	13.1409	28.9652	6.19864	9.10167	6.82671	2.64647	1.40407	5.35274e-06	0.0027818	up	yes
ENSRNOG00000043387	Cpe	ENSRNOT00000064297	GO:0003214(cardiac left ventricle morphogenesis);GO:0004180(carboxypeptidase activity);GO:0004181(metallocarboxypeptidase activity);GO:0005794(Golgi apparatus);GO:0006508(proteolysis);GO:0008270(zinc ion binding);GO:0016055(Wnt signaling pathway);GO:0030070(insulin processing);GO:0030072(peptide hormone secretion);GO:0030667(secretory granule membrane);GO:0033366(protein localization to secretory…	04940(Type I diabetes mellitus)	K01294	EC:3.4.17.10	carboxypeptidase E [Source:RGD Symbol;Acc:2394]	protein_coding	0.094821	0.055401	0.0001	0.514404	0.569986	0.351754	0.104671	-3.25607	5.92464e-06	0.00288777	down	yes
ENSRNOG00000020938	Ppp1r15a	ENSRNOT00000079633;ENSRNOT00000044788	NA	04141(Protein processing in endoplasmic reticulum);04141(Protein processing in endoplasmic reticulum)	K14019	NA	protein phosphatase 1, regulatory subunit 15A [Source:RGD Symbol;Acc:621526]	protein_coding	9.81115	9.09729	8.85014	13.1637	18.5506	30.9016	0.443315	-1.17359	6.03984e-06	0.00288777	down	yes
ENSRNOG00000045967	AABR07064061	ENSRNOT00000072431	NA	NA	NA	NA		processed_pseudogene	9.74733	9.61694	9.60964	4.60358	4.90715	4.22761	2.10898	1.07655	9.12292e-06	0.00419409	up	yes
ENSRNOG00000007830	Apold1	ENSRNOT00000010289	GO:0001525(angiogenesis);GO:0001666(response to hypoxia);GO:0005576(extracellular region);GO:0005654(nucleoplasm);GO:0005829(cytosol);GO:0005886(plasma membrane);GO:0006869(lipid transport);GO:0007275(multicellular organism development);GO:0008289(lipid binding);GO:0016020(membrane);GO:0016021(integral component of membrane);GO:0030154(cell differentiation);GO:0042118(endothelial cell activation)…	NA	NA	NA	apolipoprotein L domain containing 1 [Source:RGD Symbol;Acc:1303123]	protein_coding	2.55783	1.14321	1.28064	2.70902	5.064	9.01638	0.296716	-1.75285	1.22402e-05	0.00495083	down	yes
ENSRNOG00000029670	RGD1564606	ENSRNOT00000048598	GO:0000027(ribosomal large subunit assembly);GO:0003723(RNA binding);GO:0003735(structural constituent of ribosome);GO:0005840(ribosome);GO:0006412(translation);GO:0019843(rRNA binding);GO:0022625(cytosolic large ribosomal subunit)	NA	NA	NA	similar to 60S ribosomal protein L23a [Source:RGD Symbol;Acc:1564606]	protein_coding	14.9614	16.3895	12.9942	18.1472	39.0504	73.9834	0.338045	-1.56471	1.23597e-05	0.00495083	down	yes
ENSRNOG00000010603	Gzma	ENSRNOT00000014134	GO:0004252(serine-type endopeptidase activity);GO:0005634(nucleus);GO:0006508(proteolysis);GO:0008233(peptidase activity);GO:0008236(serine-type peptidase activity);GO:0009617(response to bacterium);GO:0016787(hydrolase activity);GO:0032078(negative regulation of endodeoxyribonuclease activity);GO:0042803(protein homodimerization activity);GO:0043065(positive regulation of apoptotic process);GO:0…	04080(Neuroactive ligand-receptor interaction)	K01352	EC:3.4.21.78	granzyme A [Source:RGD Symbol;Acc:628640]	protein_coding	0.216738	0.331285	0.360653	0.877447	1.78307	2.10114	0.190832	-2.38963	1.23795e-05	0.00495083	down	yes
ENSRNOG00000005600	Nr4a2	ENSRNOT00000041394;ENSRNOT00000078001	GO:0000122(negative regulation of transcription by RNA polymerase II);GO:0000977(RNA polymerase II regulatory region sequence-specific DNA binding);GO:0000978(RNA polymerase II cis-regulatory region sequence-specific DNA binding);GO:0001228(DNA-binding transcription activator activity, RNA polymerase II-specific);GO:0001666(response to hypoxia);GO:0001764(neuron migration);GO:0001975(response to …	04925(Aldosterone synthesis and secretion);04928(Parathyroid hormone synthesis, secretion and action);04928(Parathyroid hormone synthesis, secretion and action)	K08558	NA	nuclear receptor subfamily 4, group A, member 2 [Source:RGD Symbol;Acc:3202]	protein_coding	0.86219	0.782295	0.830238	1.10433	2.43776	6.60195	0.243958	-2.03529	1.24258e-05	0.00495083	down	yes
ENSRNOG00000010906	Ccl5	ENSRNOT00000014865	GO:0000165(MAPK cascade);GO:0004435(phosphatidylinositol phospholipase C activity);GO:0004672(protein kinase activity);GO:0005125(cytokine activity);GO:0005576(extracellular region);GO:0005615(extracellular space);GO:0005737(cytoplasm);GO:0006816(calcium ion transport);GO:0006874(cellular calcium ion homeostasis);GO:0006887(exocytosis);GO:0006935(chemotaxis);GO:0006954(inflammatory response);GO:0…	04060(Cytokine-cytokine receptor interaction);04062(Chemokine signaling pathway);04620(Toll-like receptor signaling pathway);04621(NOD-like receptor signaling pathway);04623(Cytosolic DNA-sensing pathway);04668(TNF signaling pathway);05020(Prion diseases);05142(Chagas disease (American trypanosomiasis));05163(Human cytomegalovirus infection);05164(Influenza A);05168(Herpes simplex virus 1 infecti…	K12499	NA	C-C motif chemokine ligand 5 [Source:RGD Symbol;Acc:69069]	protein_coding	1.6509	2.63207	1.08279	3.81536	6.36386	13.7013	0.224692	-2.15398	1.43154e-05	0.00551975	down	yes
ENSRNOG00000031211	Acsm5	ENSRNOT00000046025;ENSRNOT00000049380	GO:0000166(nucleotide binding);GO:0003674(molecular_function);GO:0003824(catalytic activity);GO:0003996(acyl-CoA ligase activity);GO:0004321(fatty-acyl-CoA synthase activity);GO:0005524(ATP binding);GO:0005525(GTP binding);GO:0005575(cellular_component);GO:0005739(mitochondrion);GO:0005759(mitochondrial matrix);GO:0006629(lipid metabolic process);GO:0006631(fatty acid metabolic process);GO:000663…	00650(Butanoate metabolism);00650(Butanoate metabolism)	K01896	EC:6.2.1.2	acyl-CoA synthetase medium-chain family member 5 [Source:RGD Symbol;Acc:1309578]	protein_coding	71.3266	67.4324	5.84441	6.30146	5.94514	11.2621	6.15105	2.62083	1.98279e-05	0.00740633	up	yes
ENSRNOG00000007607	Nr4a1	ENSRNOT00000010171;ENSRNOT00000078663	GO:0000977(RNA polymerase II regulatory region sequence-specific DNA binding);GO:0000978(RNA polymerase II cis-regulatory region sequence-specific DNA binding);GO:0001228(DNA-binding transcription activator activity, RNA polymerase II-specific);GO:0001938(positive regulation of endothelial cell proliferation);GO:0002042(cell migration involved in sprouting angiogenesis);GO:0003677(DNA binding);GO…	04010(MAPK signaling pathway);04151(PI3K-Akt signaling pathway);04925(Aldosterone synthesis and secretion);04927(Cortisol synthesis and secretion);04934(Cushing syndrome);04934(Cushing syndrome)	K04465	NA	nuclear receptor subfamily 4, group A, member 1 [Source:RGD Symbol;Acc:620029]	protein_coding	3.19213	1.45388	0.40862	4.61682	5.80748	22.7046	0.152575	-2.71241	2.05547e-05	0.00744517	down	yes
ENSRNOG00000007483	Ccnf	ENSRNOT00000064392	GO:0000079(regulation of cyclin-dependent protein serine/threonine kinase activity);GO:0000307(cyclin-dependent protein kinase holoenzyme complex);GO:0000320(re-entry into mitotic cell cycle);GO:0001890(placenta development);GO:0005515(protein binding);GO:0005634(nucleus);GO:0005737(cytoplasm);GO:0005813(centrosome);GO:0005814(centriole);GO:0005856(cytoskeleton);GO:0007049(cell cycle);GO:0010826(…	NA	K10289	NA	cyclin F [Source:RGD Symbol;Acc:67401]	protein_coding	2.08298	1.66345	3.77859	0.663768	0.59317	1.11668	3.17027	1.66461	2.14679e-05	0.00754722	up	yes
ENSRNOG00000005326	Cnrip1	ENSRNOT00000007104;ENSRNOT00000077171	GO:0005737(cytoplasm);GO:0005886(plasma membrane);GO:0008022(protein C-terminus binding);GO:0010469(regulation of signaling receptor activity);GO:0031718(type 1 cannabinoid receptor binding);GO:2000272(negative regulation of signaling receptor activity);GO:2000272(negative regulation of signaling receptor activity)	NA	NA	NA	cannabinoid receptor interacting protein 1 [Source:RGD Symbol;Acc:1308373]	protein_coding	0.305911	0.257865	0.221556	0.932556	0.923847	1.30096	0.248731	-2.00734	2.32912e-05	0.00795429	down	yes
ENSRNOG00000013953	Ntrk1	ENSRNOT00000018961;ENSRNOT00000092935;ENSRNOT00000092760;ENSRNOT00000092780;ENSRNOT00000092860	GO:0000139(Golgi membrane);GO:0000166(nucleotide binding);GO:0001934(positive regulation of protein phosphorylation);GO:0004672(protein kinase activity);GO:0004675(transmembrane receptor protein serine/threonine kinase activity);GO:0004713(protein tyrosine kinase activity);GO:0004714(transmembrane receptor protein tyrosine kinase activity);GO:0005004(GPI-linked ephrin receptor activity);GO:000503…	04010(MAPK signaling pathway);04014(Ras signaling pathway);04151(PI3K-Akt signaling pathway);04210(Apoptosis);04722(Neurotrophin signaling pathway);04750(Inflammatory mediator regulation of TRP channels);05200(Pathways in cancer);05202(Transcriptional misregulation in cancer);05216(Thyroid cancer);05230(Central carbon metabolism in cancer);05230(Central carbon metabolism in cancer)	K03176	EC:2.7.10.1	neurotrophic receptor tyrosine kinase 1 [Source:RGD Symbol;Acc:620144]	protein_coding;retained_intron	0.937708	1.09723	0.558988	0.174187	0.282938	0.143127	4.32139	2.11149	3.58467e-05	0.0113117	up	yes
ENSRNOG00000010409	Nol6	ENSRNOT00000014211;ENSRNOT00000076185;ENSRNOT00000075842;ENSRNOT00000076220;ENSRNOT00000066683	GO:0000794(condensed nuclear chromosome);GO:0003723(RNA binding);GO:0005634(nucleus);GO:0005730(nucleolus);GO:0006364(rRNA processing);GO:0006409(tRNA export from nucleus);GO:0032040(small-subunit processome);GO:0032545(CURI complex);GO:0034456(UTP-C complex);GO:0034456(UTP-C complex)	03008(Ribosome biogenesis in eukaryotes);03008(Ribosome biogenesis in eukaryotes)	K14544	NA	nucleolar protein 6 [Source:RGD Symbol;Acc:1308033]	protein_coding;retained_intron	3.75328	4.29744	4.64753	2.61262	1.78954	1.86701	2.02551	1.01828	3.59612e-05	0.0113117	up	yes
ENSRNOG00000003745	Atf3	ENSRNOT00000005085;ENSRNOT00000089841	GO:0000122(negative regulation of transcription by RNA polymerase II);GO:0000976(transcription regulatory region sequence-specific DNA binding);GO:0000977(RNA polymerase II regulatory region sequence-specific DNA binding);GO:0000978(RNA polymerase II cis-regulatory region sequence-specific DNA binding);GO:0000981(DNA-binding transcription factor activity, RNA polymerase II-specific);GO:0001227(DN…	NA	K09032	NA	activating transcription factor 3 [Source:RGD Symbol;Acc:2165]	protein_coding	0.715672	0.719348	0.317504	1.12121	1.43311	5.85336	0.208443	-2.26227	3.72434e-05	0.0114146	down	yes
ENSRNOG00000056940	Cited2	ENSRNOT00000086790	GO:0000122(negative regulation of transcription by RNA polymerase II);GO:0000790(nuclear chromatin);GO:0001102(RNA polymerase II activating transcription factor binding);GO:0001568(blood vessel development);GO:0001570(vasculogenesis);GO:0001666(response to hypoxia);GO:0001701(in utero embryonic development);GO:0001829(trophectodermal cell differentiation);GO:0001841(neural tube formation);GO:0001…	04137(Mitophagy - animal)	K21361	NA	Cbp/p300-interacting transactivator, with Glu/Asp-rich carboxy-terminal domain, 2 [Source:RGD Symbol;Acc:620112]	protein_coding	6.89701	4.87144	5.10389	7.94942	14.7649	11.4249	0.494221	-1.01677	4.6331e-05	0.0138449	down	yes
ENSRNOG00000001843	Bcl6	ENSRNOT00000002522	GO:0000122(negative regulation of transcription by RNA polymerase II);GO:0000902(cell morphogenesis);GO:0000977(RNA polymerase II regulatory region sequence-specific DNA binding);GO:0000978(RNA polymerase II cis-regulatory region sequence-specific DNA binding);GO:0001161(intronic transcription regulatory region sequence-specific DNA binding);GO:0001227(DNA-binding transcription repressor activity…	04068(FoxO signaling pathway);05202(Transcriptional misregulation in cancer)	K15618	NA	BCL6, transcription repressor [Source:RGD Symbol;Acc:1309345]	protein_coding	2.78321	3.49754	3.38491	26.5007	5.79575	4.73811	0.26099	-1.93793	5.01307e-05	0.0143386	down	yes
ENSRNOG00000046763	Adssl1	ENSRNOT00000073796	GO:0000166(nucleotide binding);GO:0000287(magnesium ion binding);GO:0003924(GTPase activity);GO:0004019(adenylosuccinate synthase activity);GO:0005525(GTP binding);GO:0005737(cytoplasm);GO:0006163(purine nucleotide metabolic process);GO:0006164(purine nucleotide biosynthetic process);GO:0006167(AMP biosynthetic process);GO:0006531(aspartate metabolic process);GO:0006541(glutamine metabolic proces…	00230(Purine metabolism);00250(Alanine, aspartate and glutamate metabolism)	K01939	EC:6.3.4.4	adenylosuccinate synthase like 1 [Source:RGD Symbol;Acc:1590342]	protein_coding	8.00766	7.80791	7.129	3.30234	4.5032	3.20328	2.0842	1.05949	5.03824e-05	0.0143386	up	yes
ENSRNOG00000019587	Ptprn	ENSRNOT00000026654	GO:0000302(response to reactive oxygen species);GO:0001553(luteinization);GO:0004725(protein tyrosine phosphatase activity);GO:0005634(nucleus);GO:0005768(endosome);GO:0005794(Golgi apparatus);GO:0005886(plasma membrane);GO:0006470(protein dephosphorylation);GO:0008134(transcription factor binding);GO:0009749(response to glucose);GO:0016020(membrane);GO:0016021(integral component of membrane);GO:…	04940(Type I diabetes mellitus)	K07817	EC:3.1.3.48	protein tyrosine phosphatase, receptor type, N [Source:RGD Symbol;Acc:620777]	protein_coding	1.38017	2.88282	2.56016	0.813353	0.64028	1.06881	2.70497	1.43561	5.34137e-05	0.014541	up	yes
ENSRNOG00000014870	Slc13a5	ENSRNOT00000020043	GO:0005654(nucleoplasm);GO:0005829(cytosol);GO:0005886(plasma membrane);GO:0006811(ion transport);GO:0006814(sodium ion transport);GO:0006842(tricarboxylic acid transport);GO:0015137(citrate transmembrane transporter activity);GO:0015141(succinate transmembrane transporter activity);GO:0015142(tricarboxylic acid transmembrane transporter activity);GO:0015744(succinate transport);GO:0015746(citrat…	NA	K14445	NA	solute carrier family 13 member 5 [Source:RGD Symbol;Acc:631374]	protein_coding	2.3812	1.36007	0.322203	0.300009	0.209037	0.247616	5.37026	2.42499	5.35268e-05	0.014541	up	yes
ENSRNOG00000017821	Agxt2	ENSRNOT00000024035	GO:0003824(catalytic activity);GO:0005739(mitochondrion);GO:0005759(mitochondrial matrix);GO:0008453(alanine-glyoxylate transaminase activity);GO:0008483(transaminase activity);GO:0009436(glyoxylate catabolic process);GO:0016740(transferase activity);GO:0019265(glycine biosynthetic process, by transamination of glyoxylate);GO:0019481(L-alanine catabolic process, by transamination);GO:0030170(pyri…	00250(Alanine, aspartate and glutamate metabolism);00260(Glycine, serine and threonine metabolism);00270(Cysteine and methionine metabolism);00280(Valine, leucine and isoleucine degradation)	K00827	2.6.1.40;EC:2.6.1.44	alanine-glyoxylate aminotransferase 2 [Source:RGD Symbol;Acc:621767]	protein_coding	22.6721	20.5235	26.2127	62.5288	27.0118	51.6705	0.491522	-1.02467	8.98042e-05	0.0233354	down	yes
ENSRNOG00000026293	Jun	ENSRNOT00000011731	GO:0000122(negative regulation of transcription by RNA polymerase II);GO:0000790(nuclear chromatin);GO:0000976(transcription regulatory region sequence-specific DNA binding);GO:0000978(RNA polymerase II cis-regulatory region sequence-specific DNA binding);GO:0000981(DNA-binding transcription factor activity, RNA polymerase II-specific);GO:0001102(RNA polymerase II activating transcription factor …	01522(Endocrine resistance);04010(MAPK signaling pathway);04012(ErbB signaling pathway);04024(cAMP signaling pathway);04137(Mitophagy - animal);04210(Apoptosis);04310(Wnt signaling pathway);04380(Osteoclast differentiation);04510(Focal adhesion);04530(Tight junction);04620(Toll-like receptor signaling pathway);04621(NOD-like receptor signaling pathway);04625(C-type lectin receptor signaling pathw…	K04448	NA	Jun proto-oncogene, AP-1 transcription factor subunit [Source:RGD Symbol;Acc:2943]	protein_coding	13.154	9.78918	24.7667	40.7945	23.7126	47.9831	0.424124	-1.23744	0.000105883	0.026928	down	yes
ENSRNOG00000049727	LOC298111	ENSRNOT00000076791;ENSRNOT00000074349	GO:0005550(pheromone binding);GO:0005576(extracellular region);GO:0036094(small molecule binding);GO:0036094(small molecule binding)	NA	NA	NA	alpha2u globulin [Source:RGD Symbol;Acc:1593272]	protein_coding	1.36551	2.35246	2.02757	2.33338	2.57763	55.3944	0.0952739	-3.39178	0.000108643	0.0270545	down	yes
ENSRNOG00000009488	Cyp7a1	ENSRNOT00000012819	GO:0004497(monooxygenase activity);GO:0005506(iron ion binding);GO:0005783(endoplasmic reticulum);GO:0005789(endoplasmic reticulum membrane);GO:0006629(lipid metabolic process);GO:0006699(bile acid biosynthetic process);GO:0006707(cholesterol catabolic process);GO:0008123(cholesterol 7-alpha-monooxygenase activity);GO:0008202(steroid metabolic process);GO:0008203(cholesterol metabolic process);GO…	00120(Primary bile acid biosynthesis);00140(Steroid hormone biosynthesis);03320(PPAR signaling pathway);04976(Bile secretion);04979(Cholesterol metabolism)	K00489	EC:1.14.14.23	cytochrome P450 family 7 subfamily A member 1 [Source:RGD Symbol;Acc:2482]	protein_coding	2.45718	7.56196	4.72977	13.4722	5.27104	38.4679	0.257798	-1.95569	0.000137223	0.0329195	down	yes
ENSRNOG00000000768	Ubd	ENSRNOT00000000995;ENSRNOT00000079061	GO:0001650(fibrillar center);GO:0005515(protein binding);GO:0005634(nucleus);GO:0005654(nucleoplasm);GO:0005737(cytoplasm);GO:0006511(ubiquitin-dependent protein catabolic process);GO:0016235(aggresome);GO:0016567(protein ubiquitination);GO:0034341(response to interferon-gamma);GO:0034612(response to tumor necrosis factor);GO:0043011(myeloid dendritic cell differentiation);GO:0043065(positive reg…	NA	NA	NA	ubiquitin D [Source:RGD Symbol;Acc:69418]	protein_coding;processed_transcript	3.61423	0.172913	14.9951	0.0001	0.163845	0.459225	30.1398	4.9136	0.000141252	0.0329195	up	yes
ENSRNOG00000012442	Cemip	ENSRNOT00000036343	GO:0004415(hyalurononglucosaminidase activity);GO:0005540(hyaluronic acid binding);GO:0005737(cytoplasm);GO:0005783(endoplasmic reticulum);GO:0005886(plasma membrane);GO:0007605(sensory perception of sound);GO:0010800(positive regulation of peptidyl-threonine phosphorylation);GO:0030214(hyaluronan catabolic process);GO:0030335(positive regulation of cell migration);GO:0030665(clathrin-coated vesi…	NA	K19031	EC:3.2.1.35	cell migration inducing hyaluronidase [Source:RGD Symbol;Acc:1305254]	protein_coding	0.304021	0.575461	0.2845	0.042486	0.071722	0.152025	4.37204	2.12831	0.000141947	0.0329195	up	yes
ENSRNOG00000013851	Spry4	ENSRNOT00000018511	GO:0005829(cytosol);GO:0007275(multicellular organism development);GO:0009966(regulation of signal transduction);GO:0016020(membrane);GO:0040037(negative regulation of fibroblast growth factor receptor signaling pathway);GO:0043407(negative regulation of MAP kinase activity);GO:0046580(negative regulation of Ras protein signal transduction);GO:0048513(animal organ development);GO:0070373(negative…	NA	K17385	NA	sprouty RTK signaling antagonist 4 [Source:RGD Symbol;Acc:1305324]	protein_coding	0.85716	0.546866	0.429917	0.931258	1.62217	2.31089	0.37702	-1.40729	0.000145253	0.0329195	down	yes
ENSRNOG00000016469	Fxyd2	ENSRNOT00000022074;ENSRNOT00000064611	GO:0005515(protein binding);GO:0005886(plasma membrane);GO:0005890(sodium:potassium-exchanging ATPase complex);GO:0006811(ion transport);GO:0006813(potassium ion transport);GO:0006814(sodium ion transport);GO:0008285(negative regulation of cell population proliferation);GO:0015672(monovalent inorganic cation transport);GO:0016020(membrane);GO:0016021(integral component of membrane);GO:0016323(bas…	04022(cGMP-PKG signaling pathway);04024(cAMP signaling pathway);04260(Cardiac muscle contraction);04261(Adrenergic signaling in cardiomyocytes);04911(Insulin secretion);04918(Thyroid hormone synthesis);04919(Thyroid hormone signaling pathway);04960(Aldosterone-regulated sodium reabsorption);04961(Endocrine and other factor-regulated calcium reabsorption);04964(Proximal tubule bicarbonate reclamat…	NA	NA	FXYD domain-containing ion transport regulator 2 [Source:RGD Symbol;Acc:2173]	protein_coding	1.01381	1.53351	1.84028	5.9928	2.78217	10.7338	0.224904	-2.15262	0.000147558	0.0329195	down	yes
ENSRNOG00000015562	Cdh17	ENSRNOT00000021612	GO:0002314(germinal center B cell differentiation);GO:0002315(marginal zone B cell differentiation);GO:0005178(integrin binding);GO:0005427(proton-dependent oligopeptide secondary active transmembrane transporter activity);GO:0005509(calcium ion binding);GO:0005654(nucleoplasm);GO:0005886(plasma membrane);GO:0006857(oligopeptide transport);GO:0007155(cell adhesion);GO:0007156(homophilic cell adhe…	05226(Gastric cancer)	K06811	NA	cadherin 17 [Source:RGD Symbol;Acc:619748]	protein_coding	0.923824	1.14008	0.571827	2.38701	7.88105	0.898142	0.236045	-2.08286	0.000159962	0.0345576	down	yes
ENSRNOG00000011907	Krt23	ENSRNOT00000016657	GO:0005198(structural molecule activity);GO:0005882(intermediate filament)	04915(Estrogen signaling pathway)	K07604	NA	keratin 23 [Source:RGD Symbol;Acc:1308838]	protein_coding	0.213429	0.794782	1.07177	0.0001	0.111126	0.113171	9.26921	3.21245	0.000161903	0.0345576	up	yes
ENSRNOG00000053047	Top2a	ENSRNOT00000085344;ENSRNOT00000081440	GO:0000166(nucleotide binding);GO:0000228(nuclear chromosome);GO:0000287(magnesium ion binding);GO:0000775(chromosome, centromeric region);GO:0000793(condensed chromosome);GO:0002244(hematopoietic progenitor cell differentiation);GO:0003677(DNA binding);GO:0003682(chromatin binding);GO:0003916(DNA topoisomerase activity);GO:0003918(DNA topoisomerase type II (double strand cut, ATP-hydrolyzing) ac…	01524(Platinum drug resistance);01524(Platinum drug resistance)	K03164	EC:5.6.2.2	DNA topoisomerase II alpha [Source:RGD Symbol;Acc:62048]	protein_coding	0.018787	0.039067	0.081026	0.179875	0.197281	0.235925	0.226528	-2.14224	0.000178991	0.0368875	down	yes
ENSRNOG00000019482	Gnao1	ENSRNOT00000026373	GO:0000166(nucleotide binding);GO:0001664(G protein-coupled receptor binding);GO:0003924(GTPase activity);GO:0005102(signaling receptor binding);GO:0005515(protein binding);GO:0005525(GTP binding);GO:0005834(heterotrimeric G-protein complex);GO:0005886(plasma membrane);GO:0007165(signal transduction);GO:0007186(G protein-coupled receptor signaling pathway);GO:0007188(adenylate cyclase-modulating …	04015(Rap1 signaling pathway);04713(Circadian entrainment);04723(Retrograde endocannabinoid signaling);04724(Glutamatergic synapse);04725(Cholinergic synapse);04726(Serotonergic synapse);04727(GABAergic synapse);04728(Dopaminergic synapse);04730(Long-term depression);04915(Estrogen signaling pathway);04916(Melanogenesis);04921(Oxytocin signaling pathway);04926(Relaxin signaling pathway);05032(Mor…	K04534	NA	G protein subunit alpha o1 [Source:RGD Symbol;Acc:628732]	protein_coding	0.041408	0.0001	0.114969	0.468192	0.734651	0.150538	0.115619	-3.11255	0.000225316	0.0448867	down	yes
ENSRNOG00000040153	LOC108348062	ENSRNOT00000061786	GO:0001732(formation of cytoplasmic translation initiation complex);GO:0002183(cytoplasmic translational initiation);GO:0003743(translation initiation factor activity);GO:0005737(cytoplasm);GO:0005829(cytosol);GO:0005852(eukaryotic translation initiation factor 3 complex);GO:0006412(translation);GO:0006413(translational initiation);GO:0006508(proteolysis);GO:0008237(metallopeptidase activity);GO:…	03013(RNA transport);05162(Measles)	K03247	NA	eukaryotic translation initiation factor 3 subunit H [Source:RGD Symbol;Acc:11498408]	protein_coding	0.988968	0.0001	0.0001	10.0059	38.493	0.709348	0.0201017	-5.63654	0.000270946	0.0514065	down	yes
ENSRNOG00000032247	Bank1	ENSRNOT00000073875;ENSRNOT00000051498	GO:0003674(molecular_function);GO:0005102(signaling receptor binding);GO:0005575(cellular_component);GO:0008150(biological_process);GO:0009617(response to bacterium);GO:0032715(negative regulation of interleukin-6 production);GO:0042113(B cell activation);GO:0043410(positive regulation of MAPK cascade);GO:0045947(negative regulation of translational initiation);GO:0050731(positive regulation of p…	NA	NA	NA	B-cell scaffold protein with ankyrin repeats 1 [Source:RGD Symbol;Acc:1564639]	protein_coding	0.0268673	0.124865	0.0851843	0.338075	0.250816	0.351997	0.251801	-1.98964	0.000296808	0.0554335	down	yes
ENSRNOG00000014387	Chac1	ENSRNOT00000019392	GO:0003839(gamma-glutamylcyclotransferase activity);GO:0005112(Notch binding);GO:0005737(cytoplasm);GO:0005794(Golgi apparatus);GO:0005802(trans-Golgi network);GO:0005829(cytosol);GO:0006751(glutathione catabolic process);GO:0006915(apoptotic process);GO:0006986(response to unfolded protein);GO:0007219(Notch signaling pathway);GO:0007399(nervous system development);GO:0010955(negative regulation …	00480(Glutathione metabolism)	K07232	EC:4.3.2.7	ChaC glutathione-specific gamma-glutamylcyclotransferase 1 [Source:RGD Symbol;Acc:1307153]	protein_coding	8.44022	3.95736	1.09581	3.49068	27.308	54.1669	0.15881	-2.65463	0.000304547	0.0560039	down	yes
ENSRNOG00000021526	Slc25a34	ENSRNOT00000022820	GO:0001835(blastocyst hatching);GO:0016020(membrane);GO:0016021(integral component of membrane)	NA	K15117	NA	solute carrier family 25, member 34 [Source:RGD Symbol;Acc:1359157]	protein_coding	0.778514	1.45247	0.948033	0.313404	0.287498	0.056393	4.83652	2.27397	0.000351656	0.0618139	up	yes
ENSRNOG00000004019	Phlda1	ENSRNOT00000005361	GO:0005654(nucleoplasm);GO:0005730(nucleolus);GO:0005737(cytoplasm);GO:0043065(positive regulation of apoptotic process);GO:0045210(FasL biosynthetic process);GO:1901981(phosphatidylinositol phosphate binding)	NA	NA	NA	pleckstrin homology-like domain, family A, member 1 [Source:RGD Symbol;Acc:3836]	protein_coding	2.04875	0.94946	0.985273	2.38877	2.72257	6.48646	0.343469	-1.54175	0.000361003	0.0625084	down	yes
ENSRNOG00000051305	AABR07064503	ENSRNOT00000075407	NA	NA	NA	NA		processed_pseudogene	1.42475	1.05597	1.24609	3.1053	2.66316	3.41167	0.405965	-1.30057	0.000371295	0.0625084	down	yes
ENSRNOG00000004626	Slc34a2	ENSRNOT00000048509	GO:0001701(in utero embryonic development);GO:0005436(sodium:phosphate symporter activity);GO:0005886(plasma membrane);GO:0005903(brush border);GO:0006811(ion transport);GO:0006814(sodium ion transport);GO:0006817(phosphate ion transport);GO:0015293(symporter activity);GO:0016020(membrane);GO:0016021(integral component of membrane);GO:0016324(apical plasma membrane);GO:0030643(cellular phosphate …	04928(Parathyroid hormone synthesis, secretion and action);04978(Mineral absorption)	K14683	NA	solute carrier family 34 member 2 [Source:RGD Symbol;Acc:620889]	protein_coding	3.07912	2.88657	7.71511	13.5048	13.7117	6.19174	0.409504	-1.28805	0.000411011	0.0672988	down	yes
ENSRNOG00000053301	LOC685767	ENSRNOT00000084022	GO:0016020(membrane);GO:0016021(integral component of membrane)	NA	NA	NA	similar to OX-2 membrane glycoprotein precursor (MRC OX-2 antigen) (CD200 antigen) [Source:RGD Symbol;Acc:1590201]	protein_coding	0.229439	0.052777	0.148087	0.36602	0.929154	0.550938	0.233086	-2.10107	0.000530104	0.0837695	down	yes
ENSRNOG00000058424	AABR07057150	ENSRNOT00000090748	GO:0016020(membrane);GO:0016021(integral component of membrane)	NA	NA	NA	transmembrane protein 19-like [Source:NCBI gene;Acc:100912615]	protein_coding	0.218197	4.81518	5.99434	0.0001	0.521574	0.174384	15.8431	3.98578	0.000532626	0.0837695	up	yes
ENSRNOG00000027341	Tenm2	ENSRNOT00000011922	GO:0005886(plasma membrane);GO:0005887(integral component of plasma membrane);GO:0007155(cell adhesion);GO:0007165(signal transduction);GO:0016020(membrane);GO:0016021(integral component of membrane);GO:0042995(cell projection)	NA	NA	NA	teneurin transmembrane protein 2 [Source:RGD Symbol;Acc:727907]	protein_coding	0.099096	0.063743	0.087653	0.281937	0.117343	0.491899	0.281079	-1.83095	0.000541522	0.083929	down	yes
ENSRNOG00000002141	Cd200	ENSRNOT00000058453;ENSRNOT00000093295;ENSRNOT00000093212	GO:0009986(cell surface);GO:0016020(membrane);GO:0016021(integral component of membrane);GO:0030424(axon);GO:0032088(negative regulation of NF-kappaB transcription factor activity);GO:0032793(positive regulation of CREB transcription factor activity);GO:0034113(heterotypic cell-cell adhesion);GO:0043025(neuronal cell body);GO:0043031(negative regulation of macrophage activation);GO:0044297(cell b…	NA	K06556	NA	Cd200 molecule [Source:RGD Symbol;Acc:3104]	protein_coding;processed_transcript	0.299282	0.219972	0.0552577	0.774248	1.24231	0.434105	0.234431	-2.09276	0.000552136	0.083929	down	yes
ENSRNOG00000009211	C3ar1	ENSRNOT00000012216	GO:0002430(complement receptor mediated signaling pathway);GO:0004875(complement receptor activity);GO:0004876(complement component C3a receptor activity);GO:0004930(G protein-coupled receptor activity);GO:0005886(plasma membrane);GO:0006935(chemotaxis);GO:0007165(signal transduction);GO:0007186(G protein-coupled receptor signaling pathway);GO:0010575(positive regulation of vascular endothelial g…	04080(Neuroactive ligand-receptor interaction);04610(Complement and coagulation cascades);05150(Staphylococcus aureus infection)	K04009	NA	complement C3a receptor 1 [Source:RGD Symbol;Acc:620537]	protein_coding	0.129755	0.19024	0.271508	0.695112	0.526891	0.693539	0.308791	-1.6953	0.000554705	0.083929	down	yes
ENSRNOG00000030712	RT1-A2	ENSRNOT00000052270;ENSRNOT00000038660	GO:0001916(positive regulation of T cell mediated cytotoxicity);GO:0002476(antigen processing and presentation of endogenous peptide antigen via MHC class Ib);GO:0002485(antigen processing and presentation of endogenous peptide antigen via MHC class I via ER pathway, TAP-dependent);GO:0005515(protein binding);GO:0005615(extracellular space);GO:0005886(plasma membrane);GO:0006955(immune response);…	04144(Endocytosis);04145(Phagosome);04218(Cellular senescence);04514(Cell adhesion molecules (CAMs));04612(Antigen processing and presentation);04650(Natural killer cell mediated cytotoxicity);04940(Type I diabetes mellitus);05163(Human cytomegalovirus infection);05165(Human papillomavirus infection);05166(Human T-cell leukemia virus 1 infection);05167(Kaposi sarcoma-associated herpesvirus infect…	K06751	NA	RT1 class Ia, locus A2 [Source:RGD Symbol;Acc:1595923]	protein_coding;retained_intron	161.108	167.005	108.455	37.7591	83.1511	89.2297	2.07751	1.05486	0.000604572	0.0892154	up	yes
ENSRNOG00000018646	Hbegf	ENSRNOT00000025157	GO:0005154(epidermal growth factor receptor binding);GO:0005576(extracellular region);GO:0005615(extracellular space);GO:0005886(plasma membrane);GO:0005887(integral component of plasma membrane);GO:0007173(epidermal growth factor receptor signaling pathway);GO:0007399(nervous system development);GO:0008016(regulation of heart contraction);GO:0008083(growth factor activity);GO:0008201(heparin bin…	01522(Endocrine resistance);04012(ErbB signaling pathway);04912(GnRH signaling pathway);04915(Estrogen signaling pathway);04928(Parathyroid hormone synthesis, secretion and action);05205(Proteoglycans in cancer);05219(Bladder cancer)	K08523	NA	heparin-binding EGF-like growth factor [Source:RGD Symbol;Acc:2526]	protein_coding	0.568675	0.639958	0.243617	0.602865	3.00945	1.59759	0.278748	-1.84297	0.000651049	0.0946779	down	yes
ENSRNOG00000025793	Usp31	ENSRNOT00000055048;ENSRNOT00000082927	GO:0004843(thiol-dependent ubiquitin-specific protease activity);GO:0005634(nucleus);GO:0006508(proteolysis);GO:0006511(ubiquitin-dependent protein catabolic process);GO:0008233(peptidase activity);GO:0008234(cysteine-type peptidase activity);GO:0016579(protein deubiquitination);GO:0016787(hydrolase activity);GO:0036459(thiol-dependent ubiquitinyl hydrolase activity);GO:0036459(thiol-dependent ub…	NA	K11852	EC:3.4.19.12	ubiquitin specific peptidase 31 [Source:RGD Symbol;Acc:1308183]	protein_coding	0.402433	0.534122	0.247576	0.138771	0.0710515	0.138823	3.39638	1.764	0.000722256	0.101566	up	yes
ENSRNOG00000001414	Serpine1	ENSRNOT00000001916	GO:0001300(chronological cell aging);GO:0001525(angiogenesis);GO:0002020(protease binding);GO:0004867(serine-type endopeptidase inhibitor activity);GO:0005102(signaling receptor binding);GO:0005576(extracellular region);GO:0005615(extracellular space);GO:0010469(regulation of signaling receptor activity);GO:0010757(negative regulation of plasminogen activation);GO:0010951(negative regulation of e…	04066(HIF-1 signaling pathway);04115(p53 signaling pathway);04218(Cellular senescence);04371(Apelin signaling pathway);04390(Hippo signaling pathway);04610(Complement and coagulation cascades);04933(AGE-RAGE signaling pathway in diabetic complications);05142(Chagas disease (American trypanosomiasis))	NA	NA	serpin family E member 1 [Source:RGD Symbol;Acc:3249]	protein_coding	0.846021	0.608533	0.734523	2.05233	0.828237	2.75217	0.388635	-1.36351	0.000781032	0.106087	down	yes
ENSRNOG00000062158	AC134224	ENSRNOT00000092949	NA	NA	NA	NA		lincRNA	54.9974	10.1818	55.7789	16.7144	10.1604	12.2977	3.08783	1.6266	0.000799791	0.107415	up	yes
ENSRNOG00000000562	Prf1	ENSRNOT00000000681	GO:0001771(immunological synapse formation);GO:0001913(T cell mediated cytotoxicity);GO:0002357(defense response to tumor cell);GO:0002418(immune response to tumor cell);GO:0005509(calcium ion binding);GO:0005829(cytosol);GO:0016021(integral component of membrane);GO:0019835(cytolysis);GO:0022829(wide pore channel activity);GO:0031410(cytoplasmic vesicle);GO:0042802(identical protein binding);GO:…	04210(Apoptosis);04650(Natural killer cell mediated cytotoxicity);04940(Type I diabetes mellitus);05320(Autoimmune thyroid disease);05330(Allograft rejection);05332(Graft-versus-host disease);05416(Viral myocarditis)	K07818	NA	perforin 1 [Source:RGD Symbol;Acc:708463]	protein_coding	0.062548	0.564312	0.270919	0.60021	1.26404	1.98611	0.233168	-2.10056	0.000845921	0.111113	down	yes
ENSRNOG00000048636	Il2rb	ENSRNOT00000077438;ENSRNOT00000075678	GO:0004896(cytokine receptor activity);GO:0004911(interleukin-2 receptor activity);GO:0005515(protein binding);GO:0005886(plasma membrane);GO:0009897(external side of plasma membrane);GO:0009986(cell surface);GO:0016020(membrane);GO:0016021(integral component of membrane);GO:0019221(cytokine-mediated signaling pathway);GO:0019976(interleukin-2 binding);GO:0035723(interleukin-15-mediated signaling…	04060(Cytokine-cytokine receptor interaction);04144(Endocytosis);04151(PI3K-Akt signaling pathway);04630(Jak-STAT signaling pathway);04658(Th1 and Th2 cell differentiation);04659(Th17 cell differentiation);05162(Measles);05166(Human T-cell leukemia virus 1 infection);05200(Pathways in cancer);05202(Transcriptional misregulation in cancer);05202(Transcriptional misregulation in cancer)	K05069	NA	interleukin 2 receptor subunit beta [Source:RGD Symbol;Acc:2896]	protein_coding	0.528914	0.887272	0.966485	1.45931	1.72016	1.9548	0.464071	-1.10758	0.000892453	0.114704	down	yes
ENSRNOG00000027024	Rgs16	ENSRNOT00000032236	GO:0005096(GTPase activator activity);GO:0005737(cytoplasm);GO:0007186(G protein-coupled receptor signaling pathway);GO:0031224(intrinsic component of membrane);GO:0043547(positive regulation of GTPase activity)	NA	K16449	NA	regulator of G-protein signaling 16 [Source:RGD Symbol;Acc:1589741]	protein_coding	7.02726	5.33742	12.2216	12.5799	30.689	11.9225	0.445472	-1.16659	0.00109001	0.132948	down	yes
ENSRNOG00000017804	Septin1	ENSRNOT00000055012	GO:0000166(nucleotide binding);GO:0003924(GTPase activity);GO:0005525(GTP binding);GO:0005737(cytoplasm);GO:0005815(microtubule organizing center);GO:0005856(cytoskeleton);GO:0005940(septin ring);GO:0007049(cell cycle);GO:0007056(spindle assembly involved in female meiosis);GO:0008021(synaptic vesicle);GO:0015630(microtubule cytoskeleton);GO:0017157(regulation of exocytosis);GO:0030496(midbody);G…	05100(Bacterial invasion of epithelial cells)	K13737	NA	septin 1 [Source:RGD Symbol;Acc:1307216]	protein_coding	0.1592	0.317875	0.436909	0.788091	0.897495	1.13602	0.323924	-1.62627	0.00137314	0.162507	down	yes
ENSRNOG00000011398	LOC103692719	ENSRNOT00000015308;ENSRNOT00000086997;ENSRNOT00000078211	GO:0005634(nucleus);GO:0008033(tRNA processing);GO:0008168(methyltransferase activity);GO:0016429(tRNA (adenine-N1-)-methyltransferase activity);GO:0016740(transferase activity);GO:0030488(tRNA methylation);GO:0031515(tRNA (m1A) methyltransferase complex);GO:0032259(methylation);GO:0061953(mRNA (adenine-N1-)-methyltransferase activity);GO:0080009(mRNA methylation);GO:0080009(mRNA methylation)	NA	K07442	2.1.1.220;EC:2.1.1.219	tRNA (adenine(58)-N(1))-methyltransferase catalytic subunit TRMT61A [Source:RGD Symbol;Acc:9330187]	protein_coding	1.24237	1.64409	1.7993	0.820273	0.485746	0.801789	2.22305	1.15254	0.00143119	0.166438	up	yes
ENSRNOG00000047746	AABR07000398	ENSRNOT00000074325	NA	NA	NA	NA		protein_coding	1.93761	1.13661	1.32516	1.47799	0.949058	27.7907	0.145589	-2.78002	0.00160926	0.175353	down	yes
ENSRNOG00000003657	Pkmyt1	ENSRNOT00000004936	GO:0000166(nucleotide binding);GO:0004672(protein kinase activity);GO:0004674(protein serine/threonine kinase activity);GO:0005524(ATP binding);GO:0005634(nucleus);GO:0005654(nucleoplasm);GO:0005730(nucleolus);GO:0005737(cytoplasm);GO:0005794(Golgi apparatus);GO:0006468(protein phosphorylation);GO:0010923(negative regulation of phosphatase activity);GO:0016301(kinase activity);GO:0016310(phosphor…	04110(Cell cycle);04114(Oocyte meiosis);04914(Progesterone-mediated oocyte maturation)	K06633	EC:2.7.11.1	protein kinase, membrane associated tyrosine/threonine 1 [Source:RGD Symbol;Acc:1305434]	protein_coding	0.054403	0.123218	0.141062	0.60035	0.395102	0.168358	0.273827	-1.86866	0.00161372	0.175353	down	yes
ENSRNOG00000051986	Plcg2	ENSRNOT00000090165	GO:0001784(phosphotyrosine residue binding);GO:0002092(positive regulation of receptor internalization);GO:0002316(follicular B cell differentiation);GO:0004435(phosphatidylinositol phospholipase C activity);GO:0005515(protein binding);GO:0005829(cytosol);GO:0005886(plasma membrane);GO:0006629(lipid metabolic process);GO:0006661(phosphatidylinositol biosynthetic process);GO:0007165(signal transdu…	00562(Inositol phosphate metabolism);01521(EGFR tyrosine kinase inhibitor resistance);04012(ErbB signaling pathway);04014(Ras signaling pathway);04020(Calcium signaling pathway);04064(NF-kappa B signaling pathway);04066(HIF-1 signaling pathway);04070(Phosphatidylinositol signaling system);04072(Phospholipase D signaling pathway);04360(Axon guidance);04370(VEGF signaling pathway);04380(Osteoclast …	NA	NA	phospholipase C, gamma 2 [Source:RGD Symbol;Acc:3348]	protein_coding	0.102084	0.15481	0.223755	0.441448	0.33375	0.592528	0.351422	-1.50872	0.00167499	0.18037	down	yes
ENSRNOG00000001528	Gap43	ENSRNOT00000002091	GO:0001786(phosphatidylserine binding);GO:0005515(protein binding);GO:0005516(calmodulin binding);GO:0005737(cytoplasm);GO:0005886(plasma membrane);GO:0007275(multicellular organism development);GO:0007399(nervous system development);GO:0007411(axon guidance);GO:0010001(glial cell differentiation);GO:0014069(postsynaptic density);GO:0016020(membrane);GO:0016198(axon choice point recognition);GO:0…	NA	NA	NA	growth associated protein 43 [Source:RGD Symbol;Acc:62071]	protein_coding	0.372834	0.138431	0.391392	1.27256	1.52326	0.420543	0.280645	-1.83318	0.00207513	0.219637	down	yes
ENSRNOG00000057701	Myom1	ENSRNOT00000085362	GO:0002074(extraocular skeletal muscle development);GO:0005515(protein binding);GO:0006936(muscle contraction);GO:0010628(positive regulation of gene expression);GO:0010737(protein kinase A signaling);GO:0019900(kinase binding);GO:0030017(sarcomere);GO:0031430(M band);GO:0042802(identical protein binding);GO:0042803(protein homodimerization activity);GO:0050714(positive regulation of protein secr…	NA	NA	NA	myomesin 1 [Source:RGD Symbol;Acc:631436]	protein_coding	0.774702	0.67913	1.04275	0.243243	0.467003	0.328965	2.40238	1.26447	0.00208988	0.219637	up	yes
ENSRNOG00000017912	Atp2a3	ENSRNOT00000064840;ENSRNOT00000087723;ENSRNOT00000065181	GO:0000166(nucleotide binding);GO:0005388(calcium transmembrane transporter activity, phosphorylative mechanism);GO:0005524(ATP binding);GO:0005783(endoplasmic reticulum);GO:0005789(endoplasmic reticulum membrane);GO:0006811(ion transport);GO:0006816(calcium ion transport);GO:0006874(cellular calcium ion homeostasis);GO:0006919(activation of cysteine-type endopeptidase activity involved in apopto…	04020(Calcium signaling pathway);04022(cGMP-PKG signaling pathway);04972(Pancreatic secretion);05010(Alzheimer disease);05010(Alzheimer disease)	K05853	EC:7.2.2.10	ATPase sarcoplasmic/endoplasmic reticulum Ca2+ transporting 3 [Source:RGD Symbol;Acc:2175]	protein_coding	0.0449534	0.272371	0.135348	0.438096	0.478039	0.482629	0.323623	-1.62761	0.00209475	0.219637	down	yes
ENSRNOG00000000054	Abhd8	ENSRNOT00000000060	GO:0003824(catalytic activity);GO:0006654(phosphatidic acid biosynthetic process);GO:0016787(hydrolase activity);GO:0042171(lysophosphatidic acid acyltransferase activity);GO:0052689(carboxylic ester hydrolase activity);GO:0055088(lipid homeostasis)	NA	K13701	NA	abhydrolase domain containing 8 [Source:RGD Symbol;Acc:1305693]	protein_coding	0.458655	0.319958	0.262243	0.853754	1.32861	0.618823	0.371577	-1.42827	0.00287866	0.287024	down	yes
ENSRNOG00000008471	Kif21b	ENSRNOT00000011324;ENSRNOT00000090599	GO:0000166(nucleotide binding);GO:0003774(motor activity);GO:0003777(microtubule motor activity);GO:0005515(protein binding);GO:0005524(ATP binding);GO:0005737(cytoplasm);GO:0005856(cytoskeleton);GO:0005871(kinesin complex);GO:0005874(microtubule);GO:0007018(microtubule-based movement);GO:0008017(microtubule binding);GO:0016887(ATPase activity);GO:0030424(axon);GO:0030425(dendrite);GO:0030426(gro…	NA	K10395	NA	kinesin family member 21B [Source:RGD Symbol;Acc:1306206]	protein_coding	0.0189184	0.0764478	0.0790569	0.311468	0.107513	0.183113	0.289694	-1.7874	0.00291133	0.287024	down	yes
ENSRNOG00000033625	AABR07027015	ENSRNOT00000043796	GO:0002181(cytoplasmic translation);GO:0003735(structural constituent of ribosome);GO:0005840(ribosome);GO:0006412(translation);GO:0022625(cytosolic large ribosomal subunit);GO:0042273(ribosomal large subunit biogenesis)	NA	NA	NA		protein_coding	1.97201	1.4843	2.67596	3.71854	21.9577	1.87551	0.222573	-2.16765	0.00298308	0.287024	down	yes
ENSRNOG00000008015	Fos	ENSRNOT00000010712	GO:0000976(transcription regulatory region sequence-specific DNA binding);GO:0000978(RNA polymerase II cis-regulatory region sequence-specific DNA binding);GO:0000979(RNA polymerase II core promoter sequence-specific DNA binding);GO:0000981(DNA-binding transcription factor activity, RNA polymerase II-specific);GO:0001102(RNA polymerase II activating transcription factor binding);GO:0001228(DNA-bi…	01522(Endocrine resistance);04010(MAPK signaling pathway);04024(cAMP signaling pathway);04210(Apoptosis);04380(Osteoclast differentiation);04620(Toll-like receptor signaling pathway);04657(IL-17 signaling pathway);04658(Th1 and Th2 cell differentiation);04659(Th17 cell differentiation);04660(T cell receptor signaling pathway);04662(B cell receptor signaling pathway);04668(TNF signaling pathway);0…	K04379	NA	Fos proto-oncogene, AP-1 transcription factor subunit [Source:RGD Symbol;Acc:2626]	protein_coding	4.13214	1.85864	2.95024	7.78318	2.28309	13.1618	0.384923	-1.37736	0.0030384	0.287024	down	yes
ENSRNOG00000018992	Dpysl3	ENSRNOT00000025880;ENSRNOT00000087876	GO:0005615(extracellular space);GO:0005737(cytoplasm);GO:0005829(cytosol);GO:0007399(nervous system development);GO:0010975(regulation of neuron projection development);GO:0010976(positive regulation of neuron projection development);GO:0010977(negative regulation of neuron projection development);GO:0016787(hydrolase activity);GO:0016810(hydrolase activity, acting on carbon-nitrogen (but not pep…	NA	NA	NA	dihydropyrimidinase-like 3 [Source:RGD Symbol;Acc:2410]	protein_coding	0.213922	0.0995747	0.313149	0.775212	0.725983	0.375635	0.333885	-1.58258	0.00305516	0.287024	down	yes
ENSRNOG00000050000	AABR07034739	ENSRNOT00000057971	GO:0003823(antigen binding);GO:0006910(phagocytosis, recognition);GO:0006911(phagocytosis, engulfment);GO:0006958(complement activation, classical pathway);GO:0009897(external side of plasma membrane);GO:0034987(immunoglobulin receptor binding);GO:0042571(immunoglobulin complex, circulating);GO:0042742(defense response to bacterium);GO:0045087(innate immune response);GO:0050853(B cell receptor si…	NA	NA	NA	Ig lambda-2 chain C region [Source:UniProtKB/Swiss-Prot;Acc:P20767]	protein_coding	1.37894	4.29389	4.64594	9.25654	9.51435	7.70946	0.389676	-1.35965	0.0032459	0.293926	down	yes
ENSRNOG00000039379	C17h6orf52	ENSRNOT00000060340	NA	NA	NA	NA	similar to human chromosome 6 open reading frame 52 [Source:RGD Symbol;Acc:1562963]	protein_coding	0.956733	0.565848	0.682565	0.202987	0.259051	0.27971	2.9729	1.57187	0.00339773	0.300358	up	yes
ENSRNOG00000017704	Sema3f	ENSRNOT00000085915;ENSRNOT00000024193	GO:0001755(neural crest cell migration);GO:0005515(protein binding);GO:0005615(extracellular space);GO:0005887(integral component of plasma membrane);GO:0007411(axon guidance);GO:0021612(facial nerve structural organization);GO:0021637(trigeminal nerve structural organization);GO:0021675(nerve development);GO:0021785(branchiomotor neuron axon guidance);GO:0030215(semaphorin receptor binding);GO:0…	04360(Axon guidance);04360(Axon guidance)	K06840	NA	semaphorin 3F [Source:RGD Symbol;Acc:1308514]	protein_coding	0.375723	0.485229	0.685711	0.083379	0.163229	0.289944	2.88259	1.52737	0.0034677	0.300358	up	yes
ENSRNOG00000004398	Pkhd1l1	ENSRNOT00000005958;ENSRNOT00000057146	GO:0005929(cilium);GO:0016020(membrane);GO:0016021(integral component of membrane);GO:0017154(semaphorin receptor activity);GO:0071526(semaphorin-plexin signaling pathway);GO:0071526(semaphorin-plexin signaling pathway)	NA	NA	NA	PKHD1 like 1 [Source:RGD Symbol;Acc:1310406]	protein_coding	0.0412487	0.022819	0.0231343	0.073219	0.122367	0.059022	0.342495	-1.54585	0.00365923	0.31242	down	yes
ENSRNOG00000011032	Lhfpl2	ENSRNOT00000014795	GO:0016020(membrane);GO:0016021(integral component of membrane);GO:0046545(development of primary female sexual characteristics);GO:0046546(development of primary male sexual characteristics);GO:1905516(positive regulation of fertilization)	NA	NA	NA	LHFPL tetraspan subfamily member 2 [Source:RGD Symbol;Acc:1309869]	protein_coding	0.468465	0.375198	0.567736	0.929812	0.704655	1.24063	0.490905	-1.02648	0.00378781	0.319859	down	yes
ENSRNOG00000000582	Ddo	ENSRNOT00000000710	GO:0003884(D-amino-acid oxidase activity);GO:0005777(peroxisome);GO:0005829(cytosol);GO:0006531(aspartate metabolic process);GO:0006533(aspartate catabolic process);GO:0007320(insemination);GO:0007625(grooming behavior);GO:0008445(D-aspartate oxidase activity);GO:0016491(oxidoreductase activity);GO:0019478(D-amino acid catabolic process);GO:0042445(hormone metabolic process);GO:0046416(D-amino ac…	00250(Alanine, aspartate and glutamate metabolism);04146(Peroxisome)	K00272	EC:1.4.3.1	D-aspartate oxidase [Source:RGD Symbol;Acc:1595123]	protein_coding	2.24992	2.0143	3.16118	1.13443	0.710437	1.19033	2.44643	1.29068	0.00379988	0.319859	up	yes
ENSRNOG00000016308	Il10ra	ENSRNOT00000021926	GO:0004896(cytokine receptor activity);GO:0004920(interleukin-10 receptor activity);GO:0005515(protein binding);GO:0005886(plasma membrane);GO:0010507(negative regulation of autophagy);GO:0016020(membrane);GO:0016021(integral component of membrane);GO:0019221(cytokine-mediated signaling pathway);GO:0019969(interleukin-10 binding);GO:0032496(response to lipopolysaccharide);GO:0046427(positive regu…	04060(Cytokine-cytokine receptor interaction);04630(Jak-STAT signaling pathway);05145(Toxoplasmosis);05152(Tuberculosis);05163(Human cytomegalovirus infection)	K05134	NA	interleukin 10 receptor subunit alpha [Source:RGD Symbol;Acc:620138]	protein_coding	0.590159	0.456714	0.302177	0.889966	0.937786	1.47142	0.408906	-1.29016	0.00384892	0.32084	down	yes
ENSRNOG00000033680	Cyp2b1	ENSRNOT00000079036;ENSRNOT00000044127;ENSRNOT00000091923	GO:0004497(monooxygenase activity);GO:0005506(iron ion binding);GO:0016020(membrane);GO:0016491(oxidoreductase activity);GO:0016705(oxidoreductase activity, acting on paired donors, with incorporation or reduction of molecular oxygen);GO:0016712(oxidoreductase activity, acting on paired donors, with incorporation or reduction of molecular oxygen, reduced flavin or flavoprotein as one donor, and i…	00140(Steroid hormone biosynthesis);00590(Arachidonic acid metabolism);00830(Retinol metabolism);05204(Chemical carcinogenesis);05204(Chemical carcinogenesis)	K07412	EC:1.14.14.1	cytochrome P450, family 2, subfamily b, polypeptide 1 [Source:RGD Symbol;Acc:2466]	protein_coding	69.8026	39.9192	19.0095	17.282	24.4617	17.4184	2.17591	1.12162	0.00386522	0.32084	up	yes
ENSRNOG00000030174	AABR07042903	ENSRNOT00000084913;ENSRNOT00000043480	GO:0003723(RNA binding);GO:0003735(structural constituent of ribosome);GO:0005840(ribosome);GO:0006412(translation);GO:0015935(small ribosomal subunit);GO:1990904(ribonucleoprotein complex);GO:1990904(ribonucleoprotein complex)	NA	NA	NA		protein_coding	1.2417	46.9106	38.9684	1.14193	10.0627	2.66153	6.28298	2.65145	0.00390254	0.321704	up	yes
ENSRNOG00000009855	Serpina5	ENSRNOT00000013138	GO:0001972(retinoic acid binding);GO:0002020(protease binding);GO:0002080(acrosomal membrane);GO:0004867(serine-type endopeptidase inhibitor activity);GO:0005615(extracellular space);GO:0007283(spermatogenesis);GO:0009897(external side of plasma membrane);GO:0010951(negative regulation of endopeptidase activity);GO:0016020(membrane);GO:0031091(platelet alpha granule);GO:0031094(platelet dense tub…	04610(Complement and coagulation cascades)	K03913	NA	serpin family A member 5 [Source:RGD Symbol;Acc:619817]	protein_coding	0.064265	0.416718	0.426799	0.038935	0.101188	0.0001	6.47385	2.69462	0.00405406	0.32944	up	yes
ENSRNOG00000037230	Ppidl1	ENSRNOT00000056255	GO:0000413(protein peptidyl-prolyl isomerization);GO:0003755(peptidyl-prolyl cis-trans isomerase activity);GO:0005515(protein binding);GO:0005737(cytoplasm);GO:0006457(protein folding);GO:0015031(protein transport);GO:0016018(cyclosporin A binding)	NA	NA	NA	peptidylprolyl isomerase D-like 1 [Source:RGD Symbol;Acc:1560149]	protein_coding	4.07421	4.27879	1.7896	0.898432	1.07325	2.05066	2.52157	1.33432	0.00408266	0.32944	up	yes
ENSRNOG00000005871	Il1rn	ENSRNOT00000007949	GO:0005125(cytokine activity);GO:0005149(interleukin-1 receptor binding);GO:0005150(interleukin-1, type I receptor binding);GO:0005151(interleukin-1, type II receptor binding);GO:0005152(interleukin-1 receptor antagonist activity);GO:0005576(extracellular region);GO:0005615(extracellular space);GO:0006954(inflammatory response);GO:0006955(immune response);GO:0007165(signal transduction);GO:003411…	04060(Cytokine-cytokine receptor interaction)	K05481	NA	interleukin 1 receptor antagonist [Source:RGD Symbol;Acc:621159]	protein_coding	42.0926	20.5226	18.1873	27.7103	78.0129	58.006	0.493514	-1.01884	0.0041342	0.32944	down	yes
ENSRNOG00000003954	Il2rg	ENSRNOT00000050415;ENSRNOT00000005343;ENSRNOT00000075911;ENSRNOT00000077024;ENSRNOT00000075934;ENSRNOT00000076166	GO:0004896(cytokine receptor activity);GO:0005515(protein binding);GO:0009897(external side of plasma membrane);GO:0009986(cell surface);GO:0010468(regulation of gene expression);GO:0010628(positive regulation of gene expression);GO:0016020(membrane);GO:0016021(integral component of membrane);GO:0019221(cytokine-mediated signaling pathway);GO:0019955(cytokine binding);GO:0019976(interleukin-2 bin…	04060(Cytokine-cytokine receptor interaction);04144(Endocytosis);04151(PI3K-Akt signaling pathway);04630(Jak-STAT signaling pathway);04658(Th1 and Th2 cell differentiation);04659(Th17 cell differentiation);05162(Measles);05166(Human T-cell leukemia virus 1 infection);05200(Pathways in cancer);05321(Inflammatory bowel disease (IBD));05340(Primary immunodeficiency);05340(Primary immunodeficiency)	K05070	NA	interleukin 2 receptor subunit gamma [Source:RGD Symbol;Acc:621466]	protein_coding;retained_intron	0.197603	0.324724	0.196825	0.555655	0.461044	0.723558	0.413245	-1.27493	0.00419833	0.330149	down	yes
ENSRNOG00000014426	Lox	ENSRNOT00000074226;ENSRNOT00000083881;ENSRNOT00000019844	GO:0001568(blood vessel development);GO:0001649(osteoblast differentiation);GO:0001932(regulation of protein phosphorylation);GO:0004720(protein-lysine 6-oxidase activity);GO:0005507(copper ion binding);GO:0005518(collagen binding);GO:0005576(extracellular region);GO:0005581(collagen trimer);GO:0005615(extracellular space);GO:0005634(nucleus);GO:0007507(heart development);GO:0009725(response to h…	NA	K00277	EC:1.4.3.13	lysyl oxidase [Source:RGD Symbol;Acc:3015]	protein_coding	1.69799	2.85126	0.79875	4.86452	1.82822	4.69415	0.469663	-1.0903	0.0042813	0.334473	down	yes
ENSRNOG00000049192	Hmgn5	ENSRNOT00000071650	GO:0000785(chromatin);GO:0003682(chromatin binding);GO:0005634(nucleus);GO:0005654(nucleoplasm);GO:0006325(chromatin organization);GO:0006357(regulation of transcription by RNA polymerase II);GO:0006749(glutathione metabolic process);GO:0008284(positive regulation of cell population proliferation);GO:0010628(positive regulation of gene expression);GO:0031492(nucleosomal DNA binding);GO:0043066(ne…	NA	K17045	NA	high mobility group nucleosome binding domain 5 [Source:RGD Symbol;Acc:6497694]	protein_coding	0.389277	0.653681	0.434764	3.47043	0.18325	2.06327	0.258481	-1.95187	0.00435343	0.3379	down	yes
ENSRNOG00000055221	Acot1	ENSRNOT00000080859	GO:0006629(lipid metabolic process);GO:0006631(fatty acid metabolic process);GO:0006637(acyl-CoA metabolic process);GO:0016790(thiolester hydrolase activity)	00062(Fatty acid elongation);01040(Biosynthesis of unsaturated fatty acids)	K01068	EC:3.1.2.2	acyl-CoA thioesterase 1 [Source:RGD Symbol;Acc:70894]	protein_coding	2.57988	6.01401	3.23613	1.76215	2.37243	0.738565	2.42759	1.27953	0.00495008	0.370566	up	yes
ENSRNOG00000003866	Cxcr4	ENSRNOT00000005143;ENSRNOT00000091514	GO:0001569(branching involved in blood vessel morphogenesis);GO:0001666(response to hypoxia);GO:0001667(ameboidal-type cell migration);GO:0001764(neuron migration);GO:0001934(positive regulation of protein phosphorylation);GO:0002064(epithelial cell development);GO:0003281(ventricular septum development);GO:0003779(actin binding);GO:0004930(G protein-coupled receptor activity);GO:0004950(chemokin…	04020(Calcium signaling pathway);04060(Cytokine-cytokine receptor interaction);04062(Chemokine signaling pathway);04144(Endocytosis);04360(Axon guidance);04670(Leukocyte transendothelial migration);04672(Intestinal immune network for IgA production);04810(Regulation of actin cytoskeleton);05163(Human cytomegalovirus infection);05170(Human immunodeficiency virus 1 infection);05200(Pathways in canc…	K04189	NA	C-X-C motif chemokine receptor 4 [Source:RGD Symbol;Acc:620465]	protein_coding	0.415227	0.603032	0.370545	0.870176	0.889091	1.53631	0.421415	-1.24669	0.00496031	0.370566	down	yes
ENSRNOG00000051970	Aqp5	ENSRNOT00000084911	GO:0005783(endoplasmic reticulum);GO:0005886(plasma membrane);GO:0005887(integral component of plasma membrane);GO:0005902(microvillus);GO:0006833(water transport);GO:0009925(basal plasma membrane);GO:0015250(water channel activity);GO:0015267(channel activity);GO:0015670(carbon dioxide transport);GO:0016020(membrane);GO:0016021(integral component of membrane);GO:0016324(apical plasma membrane);G…	04970(Salivary secretion)	K09867	NA	aquaporin 5 [Source:RGD Symbol;Acc:2144]	protein_coding	0.287615	0.334179	0.252009	0.842341	0.758976	0.573893	0.40171	-1.31577	0.00504726	0.372407	down	yes
ENSRNOG00000034203	AABR07064312	ENSRNOT00000047882	GO:0000028(ribosomal small subunit assembly);GO:0003723(RNA binding);GO:0003735(structural constituent of ribosome);GO:0005840(ribosome);GO:0006412(translation);GO:0022627(cytosolic small ribosomal subunit)	NA	NA	NA		protein_coding	9.68431	7.3248	4.62695	4.37726	1.51123	1.56913	2.9012	1.53665	0.00513891	0.376843	up	yes
ENSRNOG00000014034	Olfml2a	ENSRNOT00000018853	GO:0030198(extracellular matrix organization);GO:0031012(extracellular matrix);GO:0042802(identical protein binding);GO:0050840(extracellular matrix binding)	NA	NA	NA	olfactomedin-like 2A [Source:RGD Symbol;Acc:1311651]	protein_coding	0.104103	0.081547	0.044274	0.249732	0.176066	0.179488	0.37986	-1.39646	0.00541213	0.385066	down	yes
ENSRNOG00000012109	Otulinl	ENSRNOT00000067638	GO:0005635(nuclear envelope);GO:0005737(cytoplasm);GO:0042406(extrinsic component of endoplasmic reticulum membrane)	NA	NA	NA	OTU deubiquitinase with linear linkage specificity like [Source:RGD Symbol;Acc:1563205]	protein_coding	0.491482	0.895047	0.624144	1.54521	1.40027	1.43171	0.459353	-1.12232	0.00559334	0.390112	down	yes
ENSRNOG00000018877	Zfp629	ENSRNOT00000044511;ENSRNOT00000085954;ENSRNOT00000024969	GO:0003676(nucleic acid binding);GO:0003677(DNA binding);GO:0005634(nucleus);GO:0006355(regulation of transcription, DNA-templated);GO:0035914(skeletal muscle cell differentiation);GO:0046872(metal ion binding);GO:0046872(metal ion binding)	05168(Herpes simplex virus 1 infection);05168(Herpes simplex virus 1 infection)	K09228	NA	zinc finger protein 629 [Source:RGD Symbol;Acc:1306257]	protein_coding	0.483461	1.51058	1.4613	0.399525	0.514536	0.665064	2.18814	1.1297	0.00564072	0.390112	up	yes
ENSRNOG00000019822	Gadd45b	ENSRNOT00000026871	GO:0000185(activation of MAPKKK activity);GO:0000186(activation of MAPKK activity);GO:0005634(nucleus);GO:0005737(cytoplasm);GO:0006469(negative regulation of protein kinase activity);GO:0043065(positive regulation of apoptotic process);GO:0046330(positive regulation of JNK cascade);GO:0051726(regulation of cell cycle);GO:1900745(positive regulation of p38MAPK cascade)	04010(MAPK signaling pathway);04064(NF-kappa B signaling pathway);04068(FoxO signaling pathway);04110(Cell cycle);04115(p53 signaling pathway);04210(Apoptosis);04218(Cellular senescence);05169(Epstein-Barr virus infection);05200(Pathways in cancer);05202(Transcriptional misregulation in cancer);05210(Colorectal cancer);05212(Pancreatic cancer);05213(Endometrial cancer);05214(Glioma);05216(Thyroid…	K04402	NA	growth arrest and DNA-damage-inducible, beta [Source:RGD Symbol;Acc:1309080]	protein_coding	4.58325	6.50301	3.03133	7.09364	4.5747	18.9074	0.461725	-1.11489	0.00605879	0.404585	down	yes
ENSRNOG00000051743	AABR07043822	ENSRNOT00000081658	NA	NA	NA	NA		lincRNA	0.563366	0.250314	1.25175	2.24994	1.33033	3.00341	0.31372	-1.67245	0.0061704	0.408177	down	yes
ENSRNOG00000016148	Gtse1	ENSRNOT00000022012	GO:0005737(cytoplasm);GO:0005856(cytoskeleton);GO:0005881(cytoplasmic microtubule);GO:0008017(microtubule binding);GO:0015630(microtubule cytoskeleton)	04115(p53 signaling pathway)	K10129	NA	G-2 and S-phase expressed 1 [Source:RGD Symbol;Acc:1563164]	protein_coding	0.872198	0.908853	0.995738	0.28917	0.460596	0.438507	2.33683	1.22455	0.00631103	0.412091	up	yes
ENSRNOG00000011042	RGD1560925	ENSRNOT00000014921;ENSRNOT00000056434	GO:0005515(protein binding);GO:0005515(protein binding)	NA	NA	NA	similar to 2610034M16Rik protein [Source:RGD Symbol;Acc:1560925]	protein_coding	0.436525	0.282004	0.612519	0.136432	0.194035	0.160308	2.71213	1.43943	0.00634357	0.412091	up	yes
ENSRNOG00000045989	Hba-a3	ENSRNOT00000052292	GO:0004601(peroxidase activity);GO:0005344(oxygen carrier activity);GO:0005506(iron ion binding);GO:0005833(hemoglobin complex);GO:0015671(oxygen transport);GO:0019825(oxygen binding);GO:0020037(heme binding);GO:0031720(haptoglobin binding);GO:0031838(haptoglobin-hemoglobin complex);GO:0042744(hydrogen peroxide catabolic process);GO:0043177(organic acid binding);GO:0044877(protein-containing comp…	05143(African trypanosomiasis);05144(Malaria)	K13822	NA	hemoglobin alpha, adult chain 3 [Source:RGD Symbol;Acc:1359209]	protein_coding	3.07542	0.0001	2.81775	6.14804	23.8355	5.51842	0.165999	-2.59076	0.00646595	0.41777	down	yes
ENSRNOG00000018505	Cidea	ENSRNOT00000024968	GO:0001659(temperature homeostasis);GO:0003674(molecular_function);GO:0005634(nucleus);GO:0005737(cytoplasm);GO:0005739(mitochondrion);GO:0005740(mitochondrial envelope);GO:0005811(lipid droplet);GO:0006629(lipid metabolic process);GO:0006915(apoptotic process);GO:0008150(biological_process);GO:0008219(cell death);GO:0010890(positive regulation of sequestering of triglyceride);GO:0019915(lipid st…	NA	NA	NA	cell death-inducing DFFA-like effector a [Source:RGD Symbol;Acc:1305106]	protein_coding	6.64862	20.0753	4.58803	2.07472	4.11072	5.08694	2.77776	1.47392	0.00671299	0.424552	up	yes
ENSRNOG00000042714	RGD1559459	ENSRNOT00000065079	GO:0005640(nuclear outer membrane);GO:0005783(endoplasmic reticulum);GO:0008194(UDP-glycosyltransferase activity);GO:0008202(steroid metabolic process);GO:0015020(glucuronosyltransferase activity);GO:0016020(membrane);GO:0016021(integral component of membrane);GO:0016740(transferase activity);GO:0016757(transferase activity, transferring glycosyl groups);GO:0016758(transferase activity, transferr…	00040(Pentose and glucuronate interconversions);00053(Ascorbate and aldarate metabolism);00140(Steroid hormone biosynthesis);00830(Retinol metabolism);00860(Porphyrin and chlorophyll metabolism);00980(Metabolism of xenobiotics by cytochrome P450);00982(Drug metabolism - cytochrome P450);00983(Drug metabolism - other enzymes);05204(Chemical carcinogenesis)	K00699	EC:2.4.1.17	similar to Expressed sequence AI788959 [Source:RGD Symbol;Acc:1559459]	protein_coding	3.55684	3.75072	3.99714	2.77844	1.08228	1.452	2.12786	1.0894	0.00730335	0.447676	up	yes
ENSRNOG00000010532	Abitram	ENSRNOT00000014053	GO:0003785(actin monomer binding);GO:0005634(nucleus);GO:0016607(nuclear speck);GO:0030027(lamellipodium);GO:0030425(dendrite);GO:0030426(growth cone);GO:0030833(regulation of actin filament polymerization);GO:0032433(filopodium tip);GO:0048813(dendrite morphogenesis);GO:0051015(actin filament binding);GO:0051489(regulation of filopodium assembly)	NA	NA	NA	actin binding transcription modulator [Source:RGD Symbol;Acc:1594560]	protein_coding	2.85409	2.78157	2.58163	1.39257	0.99009	1.33907	2.20792	1.14269	0.00801206	0.464894	up	yes
ENSRNOG00000030447	AC105662	ENSRNOT00000041753	GO:0003735(structural constituent of ribosome);GO:0005840(ribosome);GO:0006412(translation);GO:0022627(cytosolic small ribosomal subunit)	NA	NA	NA		protein_coding	1.36569	0.339705	1.23014	1.64139	3.25623	3.6988	0.341484	-1.55011	0.00870077	0.500002	down	yes
ENSRNOG00000007887	Elk4	ENSRNOT00000090233;ENSRNOT00000065094;ENSRNOT00000087504	GO:0000122(negative regulation of transcription by RNA polymerase II);GO:0000978(RNA polymerase II cis-regulatory region sequence-specific DNA binding);GO:0000981(DNA-binding transcription factor activity, RNA polymerase II-specific);GO:0001228(DNA-binding transcription activator activity, RNA polymerase II-specific);GO:0003677(DNA binding);GO:0003682(chromatin binding);GO:0003700(DNA-binding tra…	04010(MAPK signaling pathway);05166(Human T-cell leukemia virus 1 infection);05202(Transcriptional misregulation in cancer);05202(Transcriptional misregulation in cancer)	K04376	NA	ETS transcription factor ELK4 [Source:RGD Symbol;Acc:1310504]	protein_coding	4.65927	4.9633	4.27591	0.774592	0.65583	4.02289	2.54863	1.34972	0.0089499	0.511857	up	yes
ENSRNOG00000010941	Tifa	ENSRNOT00000014533;ENSRNOT00000083193	GO:0002376(immune system process);GO:0002753(cytoplasmic pattern recognition receptor signaling pathway);GO:0005515(protein binding);GO:0005737(cytoplasm);GO:0007249(I-kappaB kinase/NF-kappaB signaling);GO:0043123(positive regulation of I-kappaB kinase/NF-kappaB signaling);GO:0045087(innate immune response);GO:0051260(protein homooligomerization);GO:0051260(protein homooligomerization)	NA	NA	NA	TRAF-interacting protein with forkhead-associated domain [Source:RGD Symbol;Acc:1359151]	protein_coding	0.69212	0.424165	0.690283	2.2997	0.76893	1.09617	0.433771	-1.205	0.00902184	0.513515	down	yes
ENSRNOG00000029386	RT1-N2	ENSRNOT00000050159;ENSRNOT00000084770;ENSRNOT00000086026	GO:0002476(antigen processing and presentation of endogenous peptide antigen via MHC class Ib);GO:0005615(extracellular space);GO:0009897(external side of plasma membrane);GO:0016020(membrane);GO:0016021(integral component of membrane);GO:0016021(integral component of membrane)	04144(Endocytosis);04145(Phagosome);04218(Cellular senescence);04514(Cell adhesion molecules (CAMs));04612(Antigen processing and presentation);04650(Natural killer cell mediated cytotoxicity);04940(Type I diabetes mellitus);05163(Human cytomegalovirus infection);05165(Human papillomavirus infection);05166(Human T-cell leukemia virus 1 infection);05167(Kaposi sarcoma-associated herpesvirus infect…	K06751	NA	RT1 class Ib, locus N2 [Source:RGD Symbol;Acc:1595850]	protein_coding	2.44471	3.96162	1.11693	12.1555	2.24507	4.07955	0.407099	-1.29655	0.00930277	0.51779	down	yes
ENSRNOG00000033776	LOC100359668	ENSRNOT00000042177	GO:0005506(iron ion binding);GO:0005737(cytoplasm);GO:0006826(iron ion transport);GO:0006879(cellular iron ion homeostasis);GO:0006880(intracellular sequestering of iron ion);GO:0008198(ferrous iron binding);GO:0008199(ferric iron binding);GO:0046872(metal ion binding)	NA	NA	NA	ferritin light chain 2 [Source:RGD Symbol;Acc:2325062]	protein_coding	4.0795	4.25296	3.61968	2.89673	27.3462	4.84364	0.340647	-1.55365	0.00978259	0.520587	down	yes
ENSRNOG00000027245	Tdrp	ENSRNOT00000082049;ENSRNOT00000036383	GO:0003674(molecular_function);GO:0005575(cellular_component);GO:0005634(nucleus);GO:0005737(cytoplasm);GO:0005829(cytosol);GO:0007283(spermatogenesis);GO:0008150(biological_process);GO:0043231(intracellular membrane-bounded organelle);GO:0043231(intracellular membrane-bounded organelle)	NA	NA	NA	testis development related protein [Source:RGD Symbol;Acc:1559733]	protein_coding	0.149368	0.112744	0.207658	0.392693	0.356604	0.36587	0.421255	-1.24723	0.00978771	0.520587	down	yes
ENSRNOG00000001189	Sik1	ENSRNOT00000001579	GO:0000122(negative regulation of transcription by RNA polymerase II);GO:0000166(nucleotide binding);GO:0000287(magnesium ion binding);GO:0002028(regulation of sodium ion transport);GO:0004672(protein kinase activity);GO:0004674(protein serine/threonine kinase activity);GO:0005515(protein binding);GO:0005524(ATP binding);GO:0005634(nucleus);GO:0005737(cytoplasm);GO:0005829(cytosol);GO:0006468(pro…	04922(Glucagon signaling pathway)	K19008	EC:2.7.11.1	salt-inducible kinase 1 [Source:RGD Symbol;Acc:69407]	protein_coding	11.4701	7.12307	4.81951	5.33043	17.2685	27.2875	0.46932	-1.09136	0.0100116	0.527175	down	yes
ENSRNOG00000008548	LOC100360940	ENSRNOT00000011308	GO:0005739(mitochondrion);GO:0006915(apoptotic process);GO:0006919(activation of cysteine-type endopeptidase activity involved in apoptotic process);GO:0008631(intrinsic apoptotic signaling pathway in response to oxidative stress);GO:0008635(activation of cysteine-type endopeptidase activity involved in apoptotic process by cytochrome c);GO:0051402(neuron apoptotic process)	04210(Apoptosis);04215(Apoptosis - multiple species)	K10522	NA	diablo-like [Source:RGD Symbol;Acc:2321120]	protein_coding	0.386074	0.591196	0.494978	1.06794	0.915149	1.18852	0.464195	-1.1072	0.010144	0.530295	down	yes
ENSRNOG00000003687	Rgs2	ENSRNOT00000005156	GO:0001965(G-protein alpha-subunit binding);GO:0001975(response to amphetamine);GO:0005096(GTPase activator activity);GO:0005634(nucleus);GO:0005730(nucleolus);GO:0005737(cytoplasm);GO:0005829(cytosol);GO:0005886(plasma membrane);GO:0006417(regulation of translation);GO:0007049(cell cycle);GO:0007283(spermatogenesis);GO:0007420(brain development);GO:0008277(regulation of G protein-coupled recepto…	04022(cGMP-PKG signaling pathway);04740(Olfactory transduction);04921(Oxytocin signaling pathway)	K18154	NA	regulator of G-protein signaling 2 [Source:RGD Symbol;Acc:621665]	protein_coding	1.80461	1.13427	0.786522	1.84885	2.51997	4.26666	0.431406	-1.21288	0.0104614	0.541322	down	yes
ENSRNOG00000027739	Cndp1	ENSRNOT00000034970	GO:0004180(carboxypeptidase activity);GO:0005829(cytosol);GO:0006508(proteolysis);GO:0008233(peptidase activity);GO:0008237(metallopeptidase activity);GO:0016787(hydrolase activity);GO:0016805(dipeptidase activity);GO:0032268(regulation of cellular protein metabolic process);GO:0046872(metal ion binding);GO:0070573(metallodipeptidase activity)	00330(Arginine and proline metabolism);00340(Histidine metabolism);00410(beta-Alanine metabolism)	K05604	EC:3.4.13.20	carnosine dipeptidase 1 [Source:RGD Symbol;Acc:1359493]	protein_coding	0.316103	0.449425	0.341496	0.502454	0.711462	1.1529	0.467728	-1.09626	0.0108518	0.551966	down	yes
ENSRNOG00000033545	AY172581	ENSRNOT00000049396	NA	NA	NA	NA		Mt_tRNA	23.8239	71.7806	20.9177	13.8185	16.2294	14.2587	2.6299	1.39501	0.011814	0.572475	up	yes
ENSRNOG00000014004	Ncoa7	ENSRNOT00000018849	GO:0005634(nucleus);GO:0006979(response to oxidative stress);GO:0030374(nuclear receptor transcription coactivator activity);GO:0035257(nuclear hormone receptor binding);GO:0045944(positive regulation of transcription by RNA polymerase II);GO:1900408(negative regulation of cellular response to oxidative stress);GO:1902083(negative regulation of peptidyl-cysteine S-nitrosylation);GO:1903204(negati…	NA	NA	NA	nuclear receptor coactivator 7 [Source:RGD Symbol;Acc:1566426]	protein_coding	0.297371	0.249265	0.149755	0.463547	0.412439	0.670706	0.450245	-1.15122	0.0118699	0.572475	down	yes
ENSRNOG00000012543	Mcm3	ENSRNOT00000017081	GO:0000166(nucleotide binding);GO:0000727(double-strand break repair via break-induced replication);GO:0003677(DNA binding);GO:0003678(DNA helicase activity);GO:0003688(DNA replication origin binding);GO:0003697(single-stranded DNA binding);GO:0004386(helicase activity);GO:0005524(ATP binding);GO:0005634(nucleus);GO:0005654(nucleoplasm);GO:0005737(cytoplasm);GO:0005813(centrosome);GO:0006260(DNA …	03030(DNA replication);04110(Cell cycle)	K02541	EC:3.6.4.12	minichromosome maintenance complex component 3 [Source:RGD Symbol;Acc:1305168]	protein_coding	0.034731	0.181989	0.153216	0.28028	0.346549	0.340257	0.382526	-1.38637	0.0118935	0.572475	down	yes
ENSRNOG00000022769	Sp100	ENSRNOT00000034152	GO:0000122(negative regulation of transcription by RNA polymerase II);GO:0000723(telomere maintenance);GO:0000981(DNA-binding transcription factor activity, RNA polymerase II-specific);GO:0005634(nucleus);GO:0005730(nucleolus);GO:0005737(cytoplasm);GO:0006978(DNA damage response, signal transduction by p53 class mediator resulting in transcription of p21 class mediator);GO:0008134(transcription f…	05168(Herpes simplex virus 1 infection);05203(Viral carcinogenesis)	K15413	NA	SP100 nuclear antigen [Source:RGD Symbol;Acc:1359550]	protein_coding	0.177379	0.639926	0.372676	1.12668	0.674069	1.2555	0.389359	-1.36083	0.012014	0.572739	down	yes
ENSRNOG00000026764	Pla2g4c	ENSRNOT00000058334;ENSRNOT00000033633	GO:0004620(phospholipase activity);GO:0004623(phospholipase A2 activity);GO:0005509(calcium ion binding);GO:0005544(calcium-dependent phospholipid binding);GO:0005635(nuclear envelope);GO:0005654(nucleoplasm);GO:0005829(cytosol);GO:0005938(cell cortex);GO:0006629(lipid metabolic process);GO:0009395(phospholipid catabolic process);GO:0016042(lipid catabolic process);GO:0016787(hydrolase activity);…	00564(Glycerophospholipid metabolism);00565(Ether lipid metabolism);00590(Arachidonic acid metabolism);00591(Linoleic acid metabolism);00592(alpha-Linolenic acid metabolism);04010(MAPK signaling pathway);04014(Ras signaling pathway);04072(Phospholipase D signaling pathway);04217(Necroptosis);04270(Vascular smooth muscle contraction);04370(VEGF signaling pathway);04611(Platelet activation);04664(F…	K16342	EC:3.1.1.4	phospholipase A2 group IVC [Source:RGD Symbol;Acc:1594658]	protein_coding	0.123746	0.137131	0.0927974	0.391359	0.280882	0.167187	0.421329	-1.24698	0.0122582	0.576088	down	yes
ENSRNOG00000024677	Arhgap33	ENSRNOT00000034001	GO:0005096(GTPase activator activity);GO:0005515(protein binding);GO:0005737(cytoplasm);GO:0005886(plasma membrane);GO:0007165(signal transduction);GO:0007264(small GTPase mediated signal transduction);GO:0009636(response to toxic substance);GO:0019901(protein kinase binding);GO:0032991(protein-containing complex);GO:0035091(phosphatidylinositol binding);GO:0043197(dendritic spine);GO:0043547(pos…	NA	K17933	NA	Rho GTPase activating protein 33 [Source:RGD Symbol;Acc:2318374]	protein_coding	0.399711	0.583916	0.390598	0.203922	0.235333	0.158384	2.29942	1.20127	0.0129384	0.587145	up	yes
ENSRNOG00000030547	Dpp6	ENSRNOT00000045773	GO:0006508(proteolysis);GO:0008076(voltage-gated potassium channel complex);GO:0008236(serine-type peptidase activity);GO:0015459(potassium channel regulator activity);GO:0016020(membrane);GO:0016021(integral component of membrane);GO:1901379(regulation of potassium ion transmembrane transport)	NA	NA	NA	dipeptidyl peptidase like 6 [Source:RGD Symbol;Acc:68402]	protein_coding	0.268961	0.153797	0.122597	0.726786	0.414931	0.214607	0.402083	-1.31443	0.0133421	0.58973	down	yes
ENSRNOG00000003895	Rgs1	ENSRNOT00000005251	GO:0001965(G-protein alpha-subunit binding);GO:0005096(GTPase activator activity);GO:0005737(cytoplasm);GO:0005829(cytosol);GO:0005886(plasma membrane);GO:0007165(signal transduction);GO:0007186(G protein-coupled receptor signaling pathway);GO:0008277(regulation of G protein-coupled receptor signaling pathway);GO:0009617(response to bacterium);GO:0009968(negative regulation of signal transduction…	NA	K16449	NA	regulator of G-protein signaling 1 [Source:RGD Symbol;Acc:3561]	protein_coding	1.23815	0.522587	0.495803	0.505859	2.51604	3.43268	0.349603	-1.51621	0.0135852	0.590391	down	yes
ENSRNOG00000013213	Epha4	ENSRNOT00000041689	GO:0000166(nucleotide binding);GO:0004672(protein kinase activity);GO:0004713(protein tyrosine kinase activity);GO:0004714(transmembrane receptor protein tyrosine kinase activity);GO:0005003(ephrin receptor activity);GO:0005004(GPI-linked ephrin receptor activity);GO:0005005(transmembrane-ephrin receptor activity);GO:0005515(protein binding);GO:0005524(ATP binding);GO:0005737(cytoplasm);GO:000574…	04360(Axon guidance)	K05105	EC:2.7.10.1	Eph receptor A4 [Source:RGD Symbol;Acc:1560587]	protein_coding	0.048377	0.039257	0.095331	0.243125	0.154374	0.082242	0.381383	-1.39069	0.0137664	0.590391	down	yes
ENSRNOG00000002810	Gfpt2	ENSRNOT00000003770	GO:0003674(molecular_function);GO:0004360(glutamine-fructose-6-phosphate transaminase (isomerizing) activity);GO:0005575(cellular_component);GO:0006002(fructose 6-phosphate metabolic process);GO:0006047(UDP-N-acetylglucosamine metabolic process);GO:0006048(UDP-N-acetylglucosamine biosynthetic process);GO:0006487(protein N-linked glycosylation);GO:0006541(glutamine metabolic process);GO:0008150(bi…	00250(Alanine, aspartate and glutamate metabolism);00520(Amino sugar and nucleotide sugar metabolism);04931(Insulin resistance)	K00820	EC:2.6.1.16	glutamine-fructose-6-phosphate transaminase 2 [Source:RGD Symbol;Acc:1303097]	protein_coding	0.19707	0.118342	0.126032	0.363821	0.367286	0.284262	0.434762	-1.2017	0.0140455	0.59534	down	yes
ENSRNOG00000009979	Sebox	ENSRNOT00000013296	GO:0003677(DNA binding);GO:0005634(nucleus);GO:0009792(embryo development ending in birth or egg hatching);GO:0048477(oogenesis)	NA	NA	NA	SEBOX homeobox [Source:RGD Symbol;Acc:62077]	protein_coding	1.13909	2.08441	1.13377	1.93166	4.03315	3.58474	0.456281	-1.13201	0.0144417	0.597961	down	yes
ENSRNOG00000051952	Tes	ENSRNOT00000091095	GO:0005515(protein binding);GO:0005737(cytoplasm);GO:0005925(focal adhesion);GO:0008270(zinc ion binding);GO:0008285(negative regulation of cell population proliferation);GO:0030054(cell junction);GO:0032991(protein-containing complex);GO:0042127(regulation of cell population proliferation);GO:0046872(metal ion binding)	NA	NA	NA	testin LIM domain protein [Source:RGD Symbol;Acc:1566346]	protein_coding	0.542907	0.340736	0.263642	0.77203	0.674946	0.99071	0.470645	-1.08729	0.0144524	0.597961	down	yes
ENSRNOG00000008095	Onecut1	ENSRNOT00000032280	GO:0000978(RNA polymerase II cis-regulatory region sequence-specific DNA binding);GO:0001889(liver development);GO:0001952(regulation of cell-matrix adhesion);GO:0002064(epithelial cell development);GO:0003677(DNA binding);GO:0003682(chromatin binding);GO:0003700(DNA-binding transcription factor activity);GO:0005634(nucleus);GO:0006006(glucose metabolic process);GO:0006357(regulation of transcrip…	04550(Signaling pathways regulating pluripotency of stem cells);04950(Maturity onset diabetes of the young)	K08026	NA	one cut homeobox 1 [Source:RGD Symbol;Acc:2811]	protein_coding	5.6185	16.5927	9.28245	0.770914	3.62525	7.48541	2.65063	1.40633	0.0151601	0.602022	up	yes
ENSRNOG00000036674	Cd7	ENSRNOT00000054934	GO:0002250(adaptive immune response);GO:0016020(membrane);GO:0016021(integral component of membrane);GO:0038023(signaling receptor activity);GO:0048873(homeostasis of number of cells within a tissue)	04640(Hematopoietic cell lineage)	K06457	NA	Cd7 molecule [Source:RGD Symbol;Acc:1310015]	protein_coding	0.55409	0.987559	0.111948	0.877948	1.39913	2.50387	0.345872	-1.53169	0.0166286	0.635189	down	yes
ENSRNOG00000020263	Atp1a3	ENSRNOT00000027497	GO:0000166(nucleotide binding);GO:0001540(amyloid-beta binding);GO:0001917(photoreceptor inner segment);GO:0005391(sodium:potassium-exchanging ATPase activity);GO:0005515(protein binding);GO:0005524(ATP binding);GO:0005634(nucleus);GO:0005737(cytoplasm);GO:0005783(endoplasmic reticulum);GO:0005794(Golgi apparatus);GO:0005886(plasma membrane);GO:0005890(sodium:potassium-exchanging ATPase complex);…	04022(cGMP-PKG signaling pathway);04024(cAMP signaling pathway);04260(Cardiac muscle contraction);04261(Adrenergic signaling in cardiomyocytes);04911(Insulin secretion);04918(Thyroid hormone synthesis);04919(Thyroid hormone signaling pathway);04925(Aldosterone synthesis and secretion);04960(Aldosterone-regulated sodium reabsorption);04961(Endocrine and other factor-regulated calcium reabsorption)…	K01539	EC:7.2.2.13	ATPase Na+/K+ transporting subunit alpha 3 [Source:RGD Symbol;Acc:2169]	protein_coding	0.158181	0.032815	0.069672	0.3832	0.524995	0.043227	0.273977	-1.86787	0.016633	0.635189	down	yes
ENSRNOG00000011635	Ces2e	ENSRNOT00000015724	GO:0001523(retinoid metabolic process);GO:0004771(sterol esterase activity);GO:0004806(triglyceride lipase activity);GO:0005615(extracellular space);GO:0005783(endoplasmic reticulum);GO:0016042(lipid catabolic process);GO:0016787(hydrolase activity);GO:0043231(intracellular membrane-bounded organelle);GO:0052689(carboxylic ester hydrolase activity);GO:0102209(trans-permethrin hydrolase activity)	NA	NA	NA	carboxylesterase 2E [Source:RGD Symbol;Acc:621563]	protein_coding	0.0001	0.703868	0.776609	14.1231	0.754181	0.088815	0.0989287	-3.33747	0.0168445	0.638054	down	yes
ENSRNOG00000050183	RT1-CE1	ENSRNOT00000061027;ENSRNOT00000049310;ENSRNOT00000089657	GO:0002476(antigen processing and presentation of endogenous peptide antigen via MHC class Ib);GO:0005615(extracellular space);GO:0006955(immune response);GO:0009897(external side of plasma membrane);GO:0016020(membrane);GO:0016021(integral component of membrane);GO:0019882(antigen processing and presentation);GO:0019882(antigen processing and presentation)	04144(Endocytosis);04145(Phagosome);04218(Cellular senescence);04514(Cell adhesion molecules (CAMs));04612(Antigen processing and presentation);04650(Natural killer cell mediated cytotoxicity);04940(Type I diabetes mellitus);05163(Human cytomegalovirus infection);05165(Human papillomavirus infection);05166(Human T-cell leukemia virus 1 infection);05167(Kaposi sarcoma-associated herpesvirus infect…	K06751	NA	RT1 class I, locus1 [Source:RGD Symbol;Acc:1595869]	protein_coding;retained_intron	2.19644	4.7403	1.50141	1.35078	1.67106	0.815721	2.19884	1.13674	0.0168681	0.638054	up	yes
ENSRNOG00000008680	Loxl1	ENSRNOT00000034300	GO:0001669(acrosomal vesicle);GO:0003674(molecular_function);GO:0004720(protein-lysine 6-oxidase activity);GO:0005507(copper ion binding);GO:0005576(extracellular region);GO:0005604(basement membrane);GO:0005615(extracellular space);GO:0005737(cytoplasm);GO:0016491(oxidoreductase activity);GO:0016641(oxidoreductase activity, acting on the CH-NH2 group of donors, oxygen as acceptor);GO:0018057(pep…	NA	K14678	EC:1.4.3.-	lysyl oxidase-like 1 [Source:RGD Symbol;Acc:1308752]	protein_coding	0.308266	0.144004	0.347986	0.578945	0.674818	0.490882	0.458693	-1.1244	0.0171218	0.645604	down	yes
ENSRNOG00000059113	AABR07019085	ENSRNOT00000081466	NA	NA	NA	NA		lincRNA	0.36153	0.769677	0.201442	0.224911	0.037828	0.16733	3.09869	1.63166	0.017177	0.645649	up	yes
ENSRNOG00000003917	Uck2	ENSRNOT00000076125;ENSRNOT00000090668;ENSRNOT00000005213	GO:0000166(nucleotide binding);GO:0004849(uridine kinase activity);GO:0005524(ATP binding);GO:0016301(kinase activity);GO:0016310(phosphorylation);GO:0016740(transferase activity);GO:0019206(nucleoside kinase activity);GO:0042802(identical protein binding);GO:0044206(UMP salvage);GO:0044211(CTP salvage);GO:0044211(CTP salvage)	00240(Pyrimidine metabolism);00983(Drug metabolism - other enzymes);00983(Drug metabolism - other enzymes)	K00876	EC:2.7.1.48	uridine-cytidine kinase 2 [Source:RGD Symbol;Acc:620742]	protein_coding	0.367586	1.077	0.664123	0.425982	0.0770371	0.178299	3.09504	1.62996	0.0177132	0.654351	up	yes
ENSRNOG00000012965	Themis2	ENSRNOT00000017340	GO:0005634(nucleus);GO:0005737(cytoplasm);GO:0050852(T cell receptor signaling pathway)	NA	NA	NA	thymocyte selection associated family member 2 [Source:RGD Symbol;Acc:1561016]	protein_coding	0.167568	0.51425	0.533887	0.889411	0.601841	0.946352	0.498729	-1.00367	0.0180205	0.658711	down	yes
ENSRNOG00000059084	AABR07073400	ENSRNOT00000088997	NA	NA	NA	NA		protein_coding	1.61179	3.45399	14.1164	0.0001	1.92687	1.47955	5.63103	2.4934	0.0189404	0.685336	up	yes
ENSRNOG00000050492	LOC100911807	ENSRNOT00000073395	GO:0000077(DNA damage checkpoint);GO:0006281(DNA repair)	NA	NA	NA	ATR-interacting protein-like [Source:RGD Symbol;Acc:6490448]	protein_coding	0.817022	0.364404	1.04858	0.311687	0.143356	0.38849	2.64365	1.40253	0.0189782	0.685336	up	yes
ENSRNOG00000027271	RGD1359290	ENSRNOT00000029782	GO:0002181(cytoplasmic translation);GO:0003735(structural constituent of ribosome);GO:0005840(ribosome);GO:0006412(translation);GO:0015934(large ribosomal subunit);GO:0022625(cytosolic large ribosomal subunit)	NA	NA	NA	Ribosomal_L22 domain containing protein RGD1359290 [Source:RGD Symbol;Acc:1359290]	protein_coding	3.29982	11.9498	36.3918	40.3824	49.8549	30.3362	0.428298	-1.22331	0.0190655	0.686417	down	yes
ENSRNOG00000009354	Nrarp	ENSRNOT00000012388	GO:0000122(negative regulation of transcription by RNA polymerase II);GO:0001569(branching involved in blood vessel morphogenesis);GO:0001938(positive regulation of endothelial cell proliferation);GO:0002040(sprouting angiogenesis);GO:0002043(blood vessel endothelial cell proliferation involved in sprouting angiogenesis);GO:0005515(protein binding);GO:0007219(Notch signaling pathway);GO:0022407(r…	NA	NA	NA	Notch-regulated ankyrin repeat protein [Source:RGD Symbol;Acc:1591939]	protein_coding	0.532476	0.218968	0.629012	0.908729	1.36742	0.724614	0.460035	-1.12019	0.0192445	0.687597	down	yes
ENSRNOG00000021248	Cdc25b	ENSRNOT00000051064	GO:0000922(spindle pole);GO:0001556(oocyte maturation);GO:0004725(protein tyrosine phosphatase activity);GO:0005634(nucleus);GO:0005737(cytoplasm);GO:0005813(centrosome);GO:0006468(protein phosphorylation);GO:0006470(protein dephosphorylation);GO:0007049(cell cycle);GO:0007144(female meiosis I);GO:0016787(hydrolase activity);GO:0019901(protein kinase binding);GO:0032467(positive regulation of cyt…	04010(MAPK signaling pathway);04110(Cell cycle);04914(Progesterone-mediated oocyte maturation);05206(MicroRNAs in cancer)	K05866	EC:3.1.3.48	cell division cycle 25B [Source:RGD Symbol;Acc:621500]	protein_coding	0.267187	0.225186	0.242558	0.591731	0.56218	0.350885	0.488392	-1.03389	0.0194397	0.687597	down	yes
ENSRNOG00000045649	Arrdc3	ENSRNOT00000072849	GO:0001659(temperature homeostasis);GO:0005737(cytoplasm);GO:0005764(lysosome);GO:0005768(endosome);GO:0005769(early endosome);GO:0005886(plasma membrane);GO:0015031(protein transport);GO:0016020(membrane);GO:0031651(negative regulation of heat generation);GO:0031699(beta-3 adrenergic receptor binding);GO:0043588(skin development);GO:0051443(positive regulation of ubiquitin-protein transferase ac…	NA	NA	NA	arrestin domain containing 3 [Source:RGD Symbol;Acc:1359478]	protein_coding	10.7725	3.62616	1.89441	13.351	8.50236	11.4781	0.48882	-1.03263	0.0194727	0.687597	down	yes
ENSRNOG00000013729	RGD1306271	ENSRNOT00000040391	GO:0016020(membrane);GO:0016021(integral component of membrane);GO:0032391(photoreceptor connecting cilium)	NA	NA	NA	similar to KIAA1549 protein [Source:RGD Symbol;Acc:1306271]	protein_coding	0.280601	0.316829	0.251449	0.176919	0.092994	0.134264	2.10027	1.07057	0.0195036	0.687597	up	yes
ENSRNOG00000046505	Bend3	ENSRNOT00000071494	GO:0000122(negative regulation of transcription by RNA polymerase II);GO:0000182(rDNA binding);GO:0000183(chromatin silencing at rDNA);GO:0003677(DNA binding);GO:0005654(nucleoplasm);GO:0005720(nuclear heterochromatin);GO:0005730(nucleolus);GO:0006306(DNA methylation);GO:0034773(histone H4-K20 trimethylation);GO:0036124(histone H3-K9 trimethylation);GO:0043967(histone H4 acetylation);GO:0051260(p…	NA	NA	NA	BEN domain containing 3 [Source:RGD Symbol;Acc:1596570]	protein_coding	0.60768	0.474616	0.741335	0.31792	0.181537	0.346709	2.15517	1.1078	0.0195272	0.687597	up	yes
ENSRNOG00000038960	RGD1309362	ENSRNOT00000043736	GO:0003924(GTPase activity);GO:0005525(GTP binding);GO:0005789(endoplasmic reticulum membrane);GO:0006952(defense response);GO:0016020(membrane);GO:0035458(cellular response to interferon-beta)	NA	NA	NA	similar to interferon-inducible GTPase [Source:RGD Symbol;Acc:1309362]	protein_coding	0.57161	2.04537	2.02188	3.33204	1.33464	4.78159	0.490975	-1.02628	0.0196992	0.687597	down	yes
ENSRNOG00000007660	Fntb	ENSRNOT00000010588	GO:0003824(catalytic activity);GO:0004311(farnesyltranstransferase activity);GO:0004659(prenyltransferase activity);GO:0004660(protein farnesyltransferase activity);GO:0005515(protein binding);GO:0005875(microtubule associated complex);GO:0005965(protein farnesyltransferase complex);GO:0008144(drug binding);GO:0008270(zinc ion binding);GO:0008284(positive regulation of cell population proliferati…	00900(Terpenoid backbone biosynthesis)	K05954	EC:2.5.1.58	farnesyltransferase, CAAX box, beta [Source:RGD Symbol;Acc:620119]	protein_coding	0.838321	1.78214	1.15289	0.539744	0.796836	0.44779	2.11467	1.08043	0.0197584	0.687597	up	yes
ENSRNOG00000003028	Dnah17	ENSRNOT00000004047;ENSRNOT00000004035	GO:0000166(nucleotide binding);GO:0003341(cilium movement);GO:0003774(motor activity);GO:0003777(microtubule motor activity);GO:0005524(ATP binding);GO:0005737(cytoplasm);GO:0005856(cytoskeleton);GO:0005874(microtubule);GO:0005929(cilium);GO:0005930(axoneme);GO:0007018(microtubule-based movement);GO:0008569(ATP-dependent microtubule motor activity, minus-end-directed);GO:0030286(dynein complex);G…	05016(Huntington disease);05016(Huntington disease)	K10408	NA	dynein, axonemal, heavy chain 17 [Source:RGD Symbol;Acc:1563805]	protein_coding	0.0880822	0.0881435	0.118702	0.0359645	0.0400423	0.0563462	2.22834	1.15597	0.0216282	0.704419	up	yes
ENSRNOG00000024837	Tpte2	ENSRNOT00000034670	GO:0004725(protein tyrosine phosphatase activity);GO:0005216(ion channel activity);GO:0005634(nucleus);GO:0005737(cytoplasm);GO:0005789(endoplasmic reticulum membrane);GO:0005829(cytosol);GO:0005886(plasma membrane);GO:0006470(protein dephosphorylation);GO:0006811(ion transport);GO:0008138(protein tyrosine/serine/threonine phosphatase activity);GO:0008285(negative regulation of cell population pr…	NA	K18079	NA	transmembrane phosphoinositide 3-phosphatase and tensin homolog 2 [Source:RGD Symbol;Acc:1305825]	protein_coding	0.210806	0.087349	0.115848	0.062226	0.497363	0.718901	0.323822	-1.62673	0.0219671	0.706753	down	yes
ENSRNOG00000021704	Atp8b5p	ENSRNOT00000071201	GO:0000166(nucleotide binding);GO:0000287(magnesium ion binding);GO:0001669(acrosomal vesicle);GO:0005524(ATP binding);GO:0005794(Golgi apparatus);GO:0005802(trans-Golgi network);GO:0005886(plasma membrane);GO:0007030(Golgi organization);GO:0015914(phospholipid transport);GO:0016020(membrane);GO:0016021(integral component of membrane);GO:0045332(phospholipid translocation);GO:0046872(metal ion bi…	NA	K01530	EC:7.6.2.1	ATPase, class I, type 8B, member 5, pseudogene [Source:RGD Symbol;Acc:1587460]	protein_coding	0.655678	0.78191	0.865251	0.304332	0.378331	0.467648	2.00193	1.00139	0.0221251	0.706753	up	yes
ENSRNOG00000020369	Igf2	ENSRNOT00000080246;ENSRNOT00000089171;ENSRNOT00000050760;ENSRNOT00000073850	GO:0000122(negative regulation of transcription by RNA polymerase II);GO:0001503(ossification);GO:0001649(osteoblast differentiation);GO:0001701(in utero embryonic development);GO:0001892(embryonic placenta development);GO:0001934(positive regulation of protein phosphorylation);GO:0005158(insulin receptor binding);GO:0005159(insulin-like growth factor receptor binding);GO:0005178(integrin binding…	04010(MAPK signaling pathway);04014(Ras signaling pathway);04151(PI3K-Akt signaling pathway);05200(Pathways in cancer);05205(Proteoglycans in cancer);05225(Hepatocellular carcinoma);05225(Hepatocellular carcinoma)	K13769	NA	insulin-like growth factor 2 [Source:RGD Symbol;Acc:2870]	protein_coding	0.0739251	0.06875	0.0820886	0.18279	0.112865	0.179253	0.47328	-1.07924	0.0222797	0.706753	down	yes
ENSRNOG00000011250	Inmt	ENSRNOT00000015316	GO:0004790(thioether S-methyltransferase activity);GO:0005737(cytoplasm);GO:0005829(cytosol);GO:0008168(methyltransferase activity);GO:0008170(N-methyltransferase activity);GO:0009308(amine metabolic process);GO:0016740(transferase activity);GO:0030748(amine N-methyltransferase activity);GO:0032259(methylation)	00380(Tryptophan metabolism);00450(Selenocompound metabolism)	K00562	2.1.1.96;EC:2.1.1.49	indolethylamine N-methyltransferase [Source:RGD Symbol;Acc:1597087]	protein_coding	27.3594	46.4576	4.70582	14.4898	9.36729	8.10031	2.45711	1.29696	0.0225469	0.711088	up	yes
ENSRNOG00000018804	Ripor2	ENSRNOT00000048298	GO:0005737(cytoplasm);GO:0005856(cytoskeleton);GO:0005886(plasma membrane);GO:0006879(cellular iron ion homeostasis);GO:0006935(chemotaxis);GO:0007155(cell adhesion);GO:0007162(negative regulation of cell adhesion);GO:0007517(muscle organ development);GO:0007605(sensory perception of sound);GO:0008199(ferric iron binding);GO:0009968(negative regulation of signal transduction);GO:0016020(membrane)…	NA	NA	NA	RHO family interacting cell polarization regulator 2 [Source:RGD Symbol;Acc:1306939]	protein_coding	0.613121	2.96367	0.41987	3.70488	7.26202	0.590199	0.345819	-1.53191	0.0230128	0.71763	down	yes
ENSRNOG00000001427	Orai2	ENSRNOT00000001938	GO:0002115(store-operated calcium entry);GO:0003674(molecular_function);GO:0008150(biological_process);GO:0015279(store-operated calcium channel activity);GO:0016020(membrane);GO:0016021(integral component of membrane);GO:0030426(growth cone);GO:0070588(calcium ion transmembrane transport)	04020(Calcium signaling pathway)	K16057	NA	ORAI calcium release-activated calcium modulator 2 [Source:RGD Symbol;Acc:1310213]	protein_coding	0.108162	0.208345	0.115024	0.333261	0.209815	0.365783	0.474805	-1.07459	0.0230487	0.71763	down	yes
ENSRNOG00000013090	Gadd45g	ENSRNOT00000018252	GO:0000185(activation of MAPKKK activity);GO:0000186(activation of MAPKK activity);GO:0005634(nucleus);GO:0005737(cytoplasm);GO:0006469(negative regulation of protein kinase activity);GO:0006915(apoptotic process);GO:0007275(multicellular organism development);GO:0030154(cell differentiation);GO:0042802(identical protein binding);GO:0043065(positive regulation of apoptotic process);GO:0046330(pos…	04010(MAPK signaling pathway);04068(FoxO signaling pathway);04110(Cell cycle);04115(p53 signaling pathway);04210(Apoptosis);04218(Cellular senescence);05169(Epstein-Barr virus infection);05200(Pathways in cancer);05202(Transcriptional misregulation in cancer);05210(Colorectal cancer);05212(Pancreatic cancer);05213(Endometrial cancer);05214(Glioma);05216(Thyroid cancer);05217(Basal cell carcinoma)…	K04402	NA	growth arrest and DNA-damage-inducible, gamma [Source:RGD Symbol;Acc:1311796]	protein_coding	62.7263	33.1991	44.6017	22.828	148.764	112.501	0.494652	-1.01552	0.0230545	0.71763	down	yes
ENSRNOG00000021041	Fam171a2	ENSRNOT00000028563	GO:0016020(membrane);GO:0016021(integral component of membrane)	NA	NA	NA	family with sequence similarity 171, member A2 [Source:RGD Symbol;Acc:1307966]	protein_coding	0.115892	0.219154	0.314426	0.318872	0.600357	0.522518	0.450476	-1.15048	0.0232282	0.719509	down	yes
ENSRNOG00000045569	Nol8	ENSRNOT00000093381;ENSRNOT00000074667;ENSRNOT00000093395;ENSRNOT00000093737	GO:0003676(nucleic acid binding);GO:0003723(RNA binding);GO:0005634(nucleus);GO:0005730(nucleolus);GO:0006364(rRNA processing);GO:1902570(protein localization to nucleolus);GO:1990830(cellular response to leukemia inhibitory factor);GO:1990830(cellular response to leukemia inhibitory factor)	NA	NA	NA	nucleolar protein 8 [Source:RGD Symbol;Acc:1309551]	protein_coding;retained_intron	0.906966	0.356603	0.696838	0.483748	0.202817	0.156958	2.32407	1.21665	0.0235344	0.722646	up	yes
ENSRNOG00000000894	Fry	ENSRNOT00000076483;ENSRNOT00000075920;ENSRNOT00000077167;ENSRNOT00000041365	GO:0000902(cell morphogenesis);GO:0004857(enzyme inhibitor activity);GO:0005938(cell cortex);GO:0030427(site of polarized growth);GO:0031175(neuron projection development);GO:0043086(negative regulation of catalytic activity);GO:1904428(negative regulation of tubulin deacetylation);GO:1904428(negative regulation of tubulin deacetylation)	NA	NA	NA	FRY microtubule binding protein [Source:RGD Symbol;Acc:1307034]	protein_coding	0.0443326	0.0678173	0.057842	0.0804329	0.0998574	0.171318	0.48347	-1.0485	0.024855	0.737457	down	yes
ENSRNOG00000046700	Mettl27	ENSRNOT00000074851	GO:0006744(ubiquinone biosynthetic process);GO:0008168(methyltransferase activity)	NA	NA	NA	methyltransferase like 27 [Source:RGD Symbol;Acc:1588881]	protein_coding	4.96844	6.09	6.51678	1.1244	2.75493	4.5643	2.08148	1.05761	0.0250716	0.738129	up	yes
ENSRNOG00000012886	Maff	ENSRNOT00000017181	GO:0000978(RNA polymerase II cis-regulatory region sequence-specific DNA binding);GO:0001228(DNA-binding transcription activator activity, RNA polymerase II-specific);GO:0001701(in utero embryonic development);GO:0003677(DNA binding);GO:0003700(DNA-binding transcription factor activity);GO:0005634(nucleus);GO:0005654(nucleoplasm);GO:0005739(mitochondrion);GO:0006355(regulation of transcription, D…	NA	K09037	NA	MAF bZIP transcription factor F [Source:RGD Symbol;Acc:1309531]	protein_coding	2.93587	1.52147	0.921695	1.09723	4.47277	6.49299	0.445912	-1.16517	0.0251705	0.73922	down	yes
ENSRNOG00000033433	Csrnp1	ENSRNOT00000083004;ENSRNOT00000050543	GO:0001228(DNA-binding transcription activator activity, RNA polymerase II-specific);GO:0003700(DNA-binding transcription factor activity);GO:0005634(nucleus);GO:0006355(regulation of transcription, DNA-templated);GO:0009791(post-embryonic development);GO:0043565(sequence-specific DNA binding);GO:0045944(positive regulation of transcription by RNA polymerase II);GO:0048008(platelet-derived growth…	NA	K17494	NA	cysteine and serine rich nuclear protein 1 [Source:RGD Symbol;Acc:1305999]	protein_coding	2.05954	2.86496	1.98289	0.822514	6.46308	7.5786	0.4647	-1.10563	0.0257907	0.745423	down	yes
ENSRNOG00000007247	A2ml1	ENSRNOT00000009557	GO:0004866(endopeptidase inhibitor activity);GO:0004867(serine-type endopeptidase inhibitor activity);GO:0005576(extracellular region);GO:0005615(extracellular space);GO:0010466(negative regulation of peptidase activity);GO:0010951(negative regulation of endopeptidase activity);GO:0030414(peptidase inhibitor activity);GO:0052548(regulation of endopeptidase activity)	NA	NA	NA	alpha-2-macroglobulin-like 1 [Source:RGD Symbol;Acc:1565709]	protein_coding	0.207612	0.850912	1.16923	2.21369	0.262639	3.66853	0.362539	-1.46379	0.0260982	0.746939	down	yes
ENSRNOG00000000869	Arhgef6	ENSRNOT00000001158	GO:0005085(guanyl-nucleotide exchange factor activity);GO:0005515(protein binding);GO:0030027(lamellipodium);GO:0035556(intracellular signal transduction)	04810(Regulation of actin cytoskeleton);05212(Pancreatic cancer)	K05729	NA	Rac/Cdc42 guanine nucleotide exchange factor 6 [Source:RGD Symbol;Acc:1359674]	protein_coding	0.118837	0.34484	0.267288	0.494542	0.390528	0.638917	0.47964	-1.05998	0.0263815	0.746939	down	yes
ENSRNOG00000011321	Rftn1	ENSRNOT00000015210	GO:0001765(membrane raft assembly);GO:0002457(T cell antigen processing and presentation);GO:0003725(double-stranded RNA binding);GO:0005737(cytoplasm);GO:0005768(endosome);GO:0005886(plasma membrane);GO:0016020(membrane);GO:0032596(protein transport into membrane raft);GO:0032620(interleukin-17 production);GO:0032991(protein-containing complex);GO:0033227(dsRNA transport);GO:0034138(toll-like re…	NA	NA	NA	raftlin lipid raft linker 1 [Source:RGD Symbol;Acc:1563347]	protein_coding	0.111265	0.379577	0.390286	0.499786	0.572572	0.81567	0.466692	-1.09946	0.026586	0.747892	down	yes
ENSRNOG00000017673	Brsk1	ENSRNOT00000031172	GO:0000086(G2/M transition of mitotic cell cycle);GO:0000166(nucleotide binding);GO:0000287(magnesium ion binding);GO:0004672(protein kinase activity);GO:0004674(protein serine/threonine kinase activity);GO:0005515(protein binding);GO:0005524(ATP binding);GO:0005634(nucleus);GO:0005654(nucleoplasm);GO:0005737(cytoplasm);GO:0005813(centrosome);GO:0005815(microtubule organizing center);GO:0005856(c…	NA	K08796	EC:2.7.11.1	BR serine/threonine kinase 1 [Source:RGD Symbol;Acc:1563268]	protein_coding	0.217594	0.353561	0.181577	0.382605	0.717115	0.438235	0.489437	-1.03081	0.0275586	0.747892	down	yes
ENSRNOG00000050117	AABR07047899	ENSRNOT00000048383	GO:0005550(pheromone binding);GO:0005576(extracellular region);GO:0036094(small molecule binding)	NA	NA	NA		protein_coding	0.271411	163.863	0.695498	1519.96	963.621	0.159984	0.0663637	-3.91346	0.0288938	0.753951	down	yes
ENSRNOG00000007564	Evc	ENSRNOT00000010541	GO:0003416(endochondral bone growth);GO:0003674(molecular_function);GO:0005575(cellular_component);GO:0005737(cytoplasm);GO:0005856(cytoskeleton);GO:0005886(plasma membrane);GO:0005929(cilium);GO:0007224(smoothened signaling pathway);GO:0016020(membrane);GO:0016021(integral component of membrane);GO:0036064(ciliary basal body);GO:0042995(cell projection);GO:0045880(positive regulation of smoothen…	04340(Hedgehog signaling pathway)	K19605	NA	EvC ciliary complex subunit 1 [Source:RGD Symbol;Acc:735186]	protein_coding	0.536719	1.2594	0.826075	0.255175	0.58568	0.446469	2.03693	1.0264	0.0291152	0.753951	up	yes
ENSRNOG00000017406	Atrnl1	ENSRNOT00000023414	GO:0003674(molecular_function);GO:0005515(protein binding);GO:0005575(cellular_component);GO:0005604(basement membrane);GO:0007186(G protein-coupled receptor signaling pathway);GO:0008150(biological_process);GO:0009887(animal organ morphogenesis);GO:0009888(tissue development);GO:0016020(membrane);GO:0016021(integral component of membrane);GO:0016477(cell migration);GO:0034446(substrate adhesion-…	NA	NA	NA	attractin like 1 [Source:RGD Symbol;Acc:1563485]	protein_coding	0.069537	0.046072	0.111376	0.206985	0.087396	0.206495	0.453176	-1.14186	0.0308342	0.764981	down	yes
ENSRNOG00000011944	Snx10	ENSRNOT00000016265	GO:0001696(gastric acid secretion);GO:0005545(1-phosphatidylinositol binding);GO:0005634(nucleus);GO:0005768(endosome);GO:0005783(endoplasmic reticulum);GO:0005813(centrosome);GO:0006886(intracellular protein transport);GO:0006897(endocytosis);GO:0007032(endosome organization);GO:0016020(membrane);GO:0030141(secretory granule);GO:0030316(osteoclast differentiation);GO:0031313(extrinsic component …	NA	K17924	NA	sorting nexin 10 [Source:RGD Symbol;Acc:1305782]	protein_coding	0.482257	0.210514	0.549162	0.808991	0.480771	1.56029	0.435758	-1.1984	0.0308974	0.764981	down	yes
ENSRNOG00000038740	Gimap7	ENSRNOT00000059167	GO:0003924(GTPase activity);GO:0005525(GTP binding);GO:0005811(lipid droplet);GO:0005829(cytosol);GO:0042802(identical protein binding);GO:0042803(protein homodimerization activity);GO:0046039(GTP metabolic process)	NA	NA	NA	GTPase, IMAP family member 7 [Source:RGD Symbol;Acc:1565750]	protein_coding	0.248221	0.621721	0.128628	0.401119	0.819358	1.16909	0.417887	-1.25882	0.0319968	0.77032	down	yes
ENSRNOG00000046386	Olr1353	ENSRNOT00000056601	GO:0004930(G protein-coupled receptor activity);GO:0004984(olfactory receptor activity);GO:0005549(odorant binding);GO:0005886(plasma membrane);GO:0007165(signal transduction);GO:0007186(G protein-coupled receptor signaling pathway);GO:0007608(sensory perception of smell);GO:0016020(membrane);GO:0016021(integral component of membrane);GO:0050896(response to stimulus);GO:0050911(detection of chemi…	04740(Olfactory transduction)	K04257	NA	olfactory receptor 1353 [Source:RGD Symbol;Acc:1333848]	protein_coding	1.08651	1.27811	0.347323	4.06631	1.11494	1.27446	0.420085	-1.25125	0.0320017	0.77032	down	yes
ENSRNOG00000029223	Prss32	ENSRNOT00000071525	GO:0004252(serine-type endopeptidase activity);GO:0005615(extracellular space);GO:0005886(plasma membrane);GO:0006508(proteolysis);GO:0008236(serine-type peptidase activity);GO:0016020(membrane)	NA	NA	NA	protease, serine, 32 [Source:RGD Symbol;Acc:1311905]	protein_coding	1.94269	5.20574	9.04845	1.05621	4.11877	1.52779	2.41644	1.27288	0.0355839	0.813258	up	yes
ENSRNOG00000015160	Gem	ENSRNOT00000020826	GO:0000166(nucleotide binding);GO:0000278(mitotic cell cycle);GO:0000287(magnesium ion binding);GO:0003924(GTPase activity);GO:0005246(calcium channel regulator activity);GO:0005525(GTP binding);GO:0005634(nucleus);GO:0005886(plasma membrane);GO:0007165(signal transduction);GO:0009898(cytoplasmic side of plasma membrane);GO:0016020(membrane);GO:0019003(GDP binding);GO:0030496(midbody);GO:0051233(…	NA	K07846	NA	GTP binding protein overexpressed in skeletal muscle [Source:RGD Symbol;Acc:1307386]	protein_coding	1.22668	1.13064	0.184434	0.27578	1.91325	5.59837	0.326393	-1.61532	0.0392016	0.849413	down	yes
ENSRNOG00000007567	Rem1	ENSRNOT00000010149	GO:0000166(nucleotide binding);GO:0003924(GTPase activity);GO:0005246(calcium channel regulator activity);GO:0005525(GTP binding);GO:0005886(plasma membrane);GO:0007165(signal transduction);GO:0016020(membrane);GO:1901842(negative regulation of high voltage-gated calcium channel activity)	NA	K07847	NA	RRAD and GEM like GTPase 1 [Source:RGD Symbol;Acc:1306560]	protein_coding	0.492049	0.280546	0.508047	0.470514	0.982199	1.14092	0.493764	-1.01811	0.0393206	0.849413	down	yes
ENSRNOG00000022709	AABR07046657	ENSRNOT00000029408	NA	NA	NA	NA		processed_pseudogene	1.44027	1.01296	0.896752	0.522655	0.731617	0.15243	2.38144	1.25183	0.0400278	0.855907	up	yes
ENSRNOG00000056322	AABR07071969	ENSRNOT00000089770	NA	NA	NA	NA		lincRNA	0.922557	1.0765	1.71463	0.761853	0.400864	0.595423	2.11228	1.0788	0.0423048	0.872682	up	yes
ENSRNOG00000034221	Cfap126	ENSRNOT00000050804	GO:0005929(cilium);GO:0016324(apical plasma membrane);GO:0036064(ciliary basal body);GO:0044782(cilium organization)	NA	NA	NA	cilia and flagella associated protein 126 [Source:RGD Symbol;Acc:1562658]	protein_coding	2.32111	24.526	5.15846	3.35911	6.11681	3.37464	2.4906	1.31649	0.0429023	0.875105	up	yes
ENSRNOG00000055330	AABR07039234	ENSRNOT00000077323;ENSRNOT00000084627	NA	NA	NA	NA		lincRNA	0.705909	0.898678	0.469549	0.312266	0.333552	0.345795	2.09168	1.06466	0.0441188	0.88734	up	yes
ENSRNOG00000046050	Dennd1c	ENSRNOT00000075215	GO:0005085(guanyl-nucleotide exchange factor activity);GO:0005654(nucleoplasm);GO:0005813(centrosome);GO:0005829(cytosol);GO:0006897(endocytosis);GO:0017112(Rab guanyl-nucleotide exchange factor activity);GO:0017137(Rab GTPase binding);GO:0031410(cytoplasmic vesicle);GO:0032456(endocytic recycling);GO:0043231(intracellular membrane-bounded organelle);GO:1901981(phosphatidylinositol phosphate bind…	NA	NA	NA	DENN domain containing 1C [Source:RGD Symbol;Acc:1590869]	protein_coding	0.13745	0.202277	0.427352	0.470786	0.458143	0.612039	0.49779	-1.00639	0.0444513	0.891487	down	yes
ENSRNOG00000001130	Nos1	ENSRNOT00000066810;ENSRNOT00000001493	GO:0001666(response to hypoxia);GO:0002028(regulation of sodium ion transport);GO:0004517(nitric-oxide synthase activity);GO:0005515(protein binding);GO:0005516(calmodulin binding);GO:0005654(nucleoplasm);GO:0005739(mitochondrion);GO:0005856(cytoskeleton);GO:0005886(plasma membrane);GO:0005901(caveola);GO:0006809(nitric oxide biosynthetic process);GO:0006941(striated muscle contraction);GO:000940…	00220(Arginine biosynthesis);00330(Arginine and proline metabolism);04020(Calcium signaling pathway);04145(Phagosome);04371(Apelin signaling pathway);04713(Circadian entrainment);04730(Long-term depression);04926(Relaxin signaling pathway);04970(Salivary secretion);05010(Alzheimer disease);05014(Amyotrophic lateral sclerosis (ALS));05014(Amyotrophic lateral sclerosis (ALS))	NA	NA	nitric oxide synthase 1 [Source:RGD Symbol;Acc:3184]	protein_coding	0.033699	0.099249	0.145586	0.146174	0.335841	0.126389	0.457811	-1.12718	0.0445694	0.891532	down	yes
ENSRNOG00000054495	Cldn2	ENSRNOT00000083566;ENSRNOT00000090928;ENSRNOT00000085078	GO:0005198(structural molecule activity);GO:0005886(plasma membrane);GO:0005911(cell-cell junction);GO:0005923(bicellular tight junction);GO:0007155(cell adhesion);GO:0016020(membrane);GO:0016021(integral component of membrane);GO:0016338(calcium-independent cell-cell adhesion via plasma membrane cell-adhesion molecules);GO:0030054(cell junction);GO:0042802(identical protein binding);GO:0070830(b…	04514(Cell adhesion molecules (CAMs));04530(Tight junction);04670(Leukocyte transendothelial migration);05160(Hepatitis C);05160(Hepatitis C)	K06087	NA	claudin 2 [Source:RGD Symbol;Acc:1560247]	protein_coding	5.10467	30.0847	5.36279	7.80079	4.95449	6.01352	2.16061	1.11144	0.0462844	0.905663	up	yes
ENSRNOG00000051933	AABR07068043	ENSRNOT00000080398	NA	NA	NA	NA		lincRNA	1.06753	0.333025	1.66161	4.44658	1.68049	0.982824	0.430691	-1.21527	0.0466298	0.905663	down	yes
ENSRNOG00000028826	AC128901	ENSRNOT00000047694	GO:0000470(maturation of LSU-rRNA);GO:0003723(RNA binding);GO:0005840(ribosome);GO:0022625(cytosolic large ribosomal subunit);GO:0042254(ribosome biogenesis);GO:1990904(ribonucleoprotein complex)	NA	NA	NA		protein_coding	2.31545	2.55418	0.862153	0.742656	0.591815	1.25293	2.21527	1.14748	0.0472421	0.905663	up	yes
ENSRNOG00000004305	Abl2	ENSRNOT00000059524	GO:0000166(nucleotide binding);GO:0000287(magnesium ion binding);GO:0001784(phosphotyrosine residue binding);GO:0001843(neural tube closure);GO:0001891(phagocytic cup);GO:0002118(aggressive behavior);GO:0003674(molecular_function);GO:0004672(protein kinase activity);GO:0004713(protein tyrosine kinase activity);GO:0004715(non-membrane spanning protein tyrosine kinase activity);GO:0005515(protein b…	04012(ErbB signaling pathway);04014(Ras signaling pathway);05416(Viral myocarditis)	K08887	EC:2.7.10.2	ABL proto-oncogene 2, non-receptor tyrosine kinase [Source:RGD Symbol;Acc:1590898]	protein_coding	0.526719	0.82066	0.557312	0.495735	0.20246	0.237692	2.03517	1.02515	0.048639	0.912965	up	yes
ENSRNOG00000021510	Tbc1d10c	ENSRNOT00000029237	GO:0005096(GTPase activator activity);GO:0005829(cytosol);GO:0005886(plasma membrane);GO:0006886(intracellular protein transport);GO:0017137(Rab GTPase binding);GO:0031527(filopodium membrane);GO:0042147(retrograde transport, endosome to Golgi);GO:0050869(negative regulation of B cell activation);GO:0070373(negative regulation of ERK1 and ERK2 cascade);GO:0070885(negative regulation of calcineuri…	NA	K19944	NA	TBC1 domain family, member 10C [Source:RGD Symbol;Acc:1311490]	protein_coding	0.222326	0.420479	0.158865	0.652483	0.358764	0.592744	0.499797	-1.00059	0.0490006	0.915299	down	yes
ENSRNOG00000013771	Clca2	ENSRNOT00000018435	GO:0005229(intracellular calcium activated chloride channel activity);GO:0005254(chloride channel activity);GO:0005654(nucleoplasm);GO:0005829(cytosol);GO:0005886(plasma membrane);GO:0005887(integral component of plasma membrane);GO:0006508(proteolysis);GO:0006821(chloride transport);GO:0008233(peptidase activity);GO:0008237(metallopeptidase activity);GO:0015276(ligand-gated ion channel activity)…	04924(Renin secretion);04972(Pancreatic secretion)	K05028	NA	chloride channel accessory 2 [Source:RGD Symbol;Acc:1304894]	protein_coding	2.34468	1.8543	2.4705	1.01479	0.024642	1.28823	2.86531	1.51869	0.049173	0.91695	up	yes
ENSRNOG00000046667	Fosb	ENSRNOT00000091687;ENSRNOT00000072149	GO:0000978(RNA polymerase II cis-regulatory region sequence-specific DNA binding);GO:0000981(DNA-binding transcription factor activity, RNA polymerase II-specific);GO:0001228(DNA-binding transcription activator activity, RNA polymerase II-specific);GO:0003677(DNA binding);GO:0003690(double-stranded DNA binding);GO:0003700(DNA-binding transcription factor activity);GO:0005634(nucleus);GO:0005654(n…	04380(Osteoclast differentiation);04657(IL-17 signaling pathway);05030(Cocaine addiction);05031(Amphetamine addiction);05034(Alcoholism);05034(Alcoholism)	K09029	NA	FosB proto-oncogene, AP-1 transcription factor subunit [Source:RGD Symbol;Acc:1308198]	protein_coding	0.292346	0.157225	0.158873	0.662543	0.034008	1.04638	0.349092	-1.51832	0.0498102	0.922931	down	yes

## Sheet: DEGs ( LL200+HS vs. L200)
Differentially expressed genes (DEGs) screened from LL200+HS vs. L200 (Screening criteria: |log2FC| ≥ 1, p < 0.05)
gene_id	gene_name	transcript_id	GO	KEGG	KO_ENTRY	EC	Description	trans_type	FPKM.LTA_HS_1	FPKM.LTA_HS_2	FPKM.LTA_HS_3	FPKM.LTA_1	FPKM.LTA_2	FPKM.LTA_3	fc	log2(fc)	pval	qval	regulation	significant
ENSRNOG00000021027	Dbp	ENSRNOT00000028546;ENSRNOT00000091597;ENSRNOT00000091606	GO:0000977(RNA polymerase II regulatory region sequence-specific DNA binding);GO:0001228(DNA-binding transcription activator activity, RNA polymerase II-specific);GO:0001889(liver development);GO:0003677(DNA binding);GO:0003700(DNA-binding transcription factor activity);GO:0005634(nucleus);GO:0006355(regulation of transcription, DNA-templated);GO:0006357(regulation of transcription by RNA polymer…	NA	K09056	NA	D-box binding PAR bZIP transcription factor [Source:RGD Symbol;Acc:2491]	protein_coding	48.278	75.4695	81.1837	2.3733	3.10819	2.35036	26.1664	4.70964	3.78905e-60	4.62454e-56	up	yes
ENSRNOG00000018413	Per3	ENSRNOT00000024932;ENSRNOT00000092747;ENSRNOT00000093063;ENSRNOT00000092923;ENSRNOT00000093114;ENSRNOT00000092840;ENSRNOT00000093100;ENSRNOT00000092912	GO:0000122(negative regulation of transcription by RNA polymerase II);GO:0005515(protein binding);GO:0005634(nucleus);GO:0005737(cytoplasm);GO:0032922(circadian regulation of gene expression);GO:0045187(regulation of circadian sleep/wake cycle, sleep);GO:0048511(rhythmic process);GO:0050821(protein stabilization);GO:0050821(protein stabilization)	04710(Circadian rhythm);04713(Circadian entrainment);04713(Circadian entrainment)	K21945	NA	period circadian regulator 3 [Source:RGD Symbol;Acc:621581]	protein_coding;retained_intron	4.41245	4.40474	5.12096	0.394084	0.467811	0.447987	10.6408	3.41153	1.64547e-45	1.00415e-41	up	yes
ENSRNOG00000014448	Arntl	ENSRNOT00000046313	GO:0000976(transcription regulatory region sequence-specific DNA binding);GO:0000978(RNA polymerase II cis-regulatory region sequence-specific DNA binding);GO:0000981(DNA-binding transcription factor activity, RNA polymerase II-specific);GO:0001228(DNA-binding transcription activator activity, RNA polymerase II-specific);GO:0003677(DNA binding);GO:0003700(DNA-binding transcription factor activity…	04710(Circadian rhythm);04728(Dopaminergic synapse)	NA	NA	aryl hydrocarbon receptor nuclear translocator-like [Source:RGD Symbol;Acc:62003]	protein_coding	1.20556	0.820495	0.80955	11.9243	11.3886	12.821	0.078475	-3.67162	4.35742e-44	1.77274e-40	down	yes
ENSRNOG00000005341	Upp2	ENSRNOT00000035158	GO:0003824(catalytic activity);GO:0004850(uridine phosphorylase activity);GO:0005737(cytoplasm);GO:0006218(uridine catabolic process);GO:0009116(nucleoside metabolic process);GO:0009166(nucleotide catabolic process);GO:0016740(transferase activity);GO:0016757(transferase activity, transferring glycosyl groups);GO:0016763(transferase activity, transferring pentosyl groups);GO:0042802(identical pro…	00240(Pyrimidine metabolism);00983(Drug metabolism - other enzymes)	K00757	EC:2.4.2.3	uridine phosphorylase 2 [Source:RGD Symbol;Acc:1308188]	protein_coding	28.9542	39.5964	46.7268	1.88501	2.75125	4.36156	12.8117	3.67939	6.5209e-33	1.98969e-29	up	yes
ENSRNOG00000004626	Slc34a2	ENSRNOT00000048509	GO:0001701(in utero embryonic development);GO:0005436(sodium:phosphate symporter activity);GO:0005886(plasma membrane);GO:0005903(brush border);GO:0006811(ion transport);GO:0006814(sodium ion transport);GO:0006817(phosphate ion transport);GO:0015293(symporter activity);GO:0016020(membrane);GO:0016021(integral component of membrane);GO:0016324(apical plasma membrane);GO:0030643(cellular phosphate …	04928(Parathyroid hormone synthesis, secretion and action);04978(Mineral absorption)	K14683	NA	solute carrier family 34 member 2 [Source:RGD Symbol;Acc:620889]	protein_coding	2.2003	0.990912	1.09579	22.1648	15.3322	12.1545	0.0863418	-3.5338	6.95832e-23	1.69853e-19	down	yes
ENSRNOG00000013408	Npas2	ENSRNOT00000059571	GO:0003677(DNA binding);GO:0003700(DNA-binding transcription factor activity);GO:0005634(nucleus);GO:0005654(nucleoplasm);GO:0005667(transcription factor complex);GO:0005737(cytoplasm);GO:0005829(cytosol);GO:0006355(regulation of transcription, DNA-templated);GO:0007623(circadian rhythm);GO:0032922(circadian regulation of gene expression);GO:0042493(response to drug);GO:0042745(circadian sleep/wa…	04710(Circadian rhythm)	K09026	NA	neuronal PAS domain protein 2 [Source:RGD Symbol;Acc:1309681]	protein_coding	0.278452	0.298685	0.056291	4.40813	4.65547	4.1373	0.0479837	-4.38131	1.83663e-20	3.73601e-17	down	yes
ENSRNOG00000001388	Sds	ENSRNOT00000001876;ENSRNOT00000001875	GO:0003941(L-serine ammonia-lyase activity);GO:0004794(L-threonine ammonia-lyase activity);GO:0005575(cellular_component);GO:0005737(cytoplasm);GO:0005739(mitochondrion);GO:0005829(cytosol);GO:0006094(gluconeogenesis);GO:0006520(cellular amino acid metabolic process);GO:0006565(L-serine catabolic process);GO:0006566(threonine metabolic process);GO:0006567(threonine catabolic process);GO:0009097(i…	00260(Glycine, serine and threonine metabolism);00270(Cysteine and methionine metabolism);00290(Valine, leucine and isoleucine biosynthesis);00290(Valine, leucine and isoleucine biosynthesis)	K17989	4.3.1.19;EC:4.3.1.17	serine dehydratase [Source:RGD Symbol;Acc:67376]	protein_coding	226.137	280.085	540.766	19.7142	38.7869	48.271	9.80583	3.29364	7.43135e-20	1.29571e-16	up	yes
ENSRNOG00000013982	Hsd17b2	ENSRNOT00000018795	GO:0001701(in utero embryonic development);GO:0001890(placenta development);GO:0004303(estradiol 17-beta-dehydrogenase activity);GO:0016020(membrane);GO:0016021(integral component of membrane);GO:0016491(oxidoreductase activity);GO:0032526(response to retinoic acid);GO:0047035(testosterone dehydrogenase (NAD+) activity);GO:0055114(oxidation-reduction process)	00140(Steroid hormone biosynthesis);04913(Ovarian steroidogenesis)	K13368	1.1.1.239;EC:1.1.1.62	hydroxysteroid (17-beta) dehydrogenase 2 [Source:RGD Symbol;Acc:621803]	protein_coding	312.466	769.531	439.628	78.5259	51.1413	48.5761	8.53679	3.09369	2.23191e-19	3.40506e-16	up	yes
ENSRNOG00000009329	Nr1d1	ENSRNOT00000012537;ENSRNOT00000055333	GO:0000122(negative regulation of transcription by RNA polymerase II);GO:0000790(nuclear chromatin);GO:0000976(transcription regulatory region sequence-specific DNA binding);GO:0000977(RNA polymerase II regulatory region sequence-specific DNA binding);GO:0000978(RNA polymerase II cis-regulatory region sequence-specific DNA binding);GO:0001222(transcription corepressor binding);GO:0001227(DNA-bind…	04710(Circadian rhythm);04710(Circadian rhythm)	K03728	NA	nuclear receptor subfamily 1, group D, member 1 [Source:RGD Symbol;Acc:628827]	protein_coding	28.5432	48.5372	36.9518	7.95768	6.27032	9.56014	4.79366	2.26113	3.69736e-18	5.01403e-15	up	yes
ENSRNOG00000000961	Glt1d1	ENSRNOT00000064526	GO:0005829(cytosol)	NA	NA	NA	glycosyltransferase 1 domain containing 1 [Source:RGD Symbol;Acc:1304896]	protein_coding	4.42632	6.71075	8.69325	1.31463	0.694431	0.684527	7.36205	2.88011	1.43729e-16	1.75421e-13	up	yes
ENSRNOG00000007060	Plin2	ENSRNOT00000009749	GO:0003674(molecular_function);GO:0005634(nucleus);GO:0005737(cytoplasm);GO:0005811(lipid droplet);GO:0005829(cytosol);GO:0005886(plasma membrane);GO:0010890(positive regulation of sequestering of triglyceride);GO:0014070(response to organic cyclic compound);GO:0015909(long-chain fatty acid transport);GO:0019915(lipid storage);GO:0042493(response to drug)	03320(PPAR signaling pathway)	K17284	NA	perilipin 2 [Source:RGD Symbol;Acc:728889]	protein_coding	53.3951	40.1091	60.3363	162.446	174.498	176.288	0.299748	-1.73818	7.57561e-16	8.40548e-13	down	yes
ENSRNOG00000042717	Ciart	ENSRNOT00000056322;ENSRNOT00000085632	GO:0000976(transcription regulatory region sequence-specific DNA binding);GO:0000978(RNA polymerase II cis-regulatory region sequence-specific DNA binding);GO:0005634(nucleus);GO:0032922(circadian regulation of gene expression);GO:0045475(locomotor rhythm);GO:0045892(negative regulation of transcription, DNA-templated);GO:0070888(E-box binding);GO:0070888(E-box binding)	NA	K21599	NA	circadian associated repressor of transcription [Source:RGD Symbol;Acc:1566380]	protein_coding	0.587843	1.61389	0.420101	0.0001	0.0001	0.0001	8739.45	13.0933	7.62922e-15	7.75955e-12	up	yes
ENSRNOG00000017558	Tubb2a	ENSRNOT00000023611;ENSRNOT00000086264	GO:0000166(nucleotide binding);GO:0000226(microtubule cytoskeleton organization);GO:0000278(mitotic cell cycle);GO:0001764(neuron migration);GO:0003924(GTPase activity);GO:0005200(structural constituent of cytoskeleton);GO:0005525(GTP binding);GO:0005737(cytoplasm);GO:0005856(cytoskeleton);GO:0005874(microtubule);GO:0007017(microtubule-based process);GO:0007017(microtubule-based process)	04145(Phagosome);04540(Gap junction);04540(Gap junction)	K07375	NA	tubulin, beta 2A class IIa [Source:RGD Symbol;Acc:1588452]	protein_coding	3.91961	4.44155	2.2642	16.0896	17.1203	13.9012	0.225538	-2.14856	1.66898e-14	1.56692e-11	down	yes
ENSRNOG00000042978	Ncald	ENSRNOT00000064513;ENSRNOT00000080024	GO:0003073(regulation of systemic arterial blood pressure);GO:0003779(actin binding);GO:0005509(calcium ion binding);GO:0005515(protein binding);GO:0005829(cytosol);GO:0015631(tubulin binding);GO:0019722(calcium-mediated signaling);GO:0030276(clathrin binding);GO:0043014(alpha-tubulin binding);GO:0046872(metal ion binding);GO:0046872(metal ion binding)	04740(Olfactory transduction);04740(Olfactory transduction)	K19695	NA	neurocalcin delta [Source:RGD Symbol;Acc:1560287]	protein_coding	0.479613	0.386106	0.702653	4.16969	2.46401	3.29979	0.157887	-2.66303	2.02614e-14	1.76636e-11	down	yes
ENSRNOG00000016791	Chka	ENSRNOT00000022824;ENSRNOT00000023020	GO:0000166(nucleotide binding);GO:0004103(choline kinase activity);GO:0004104(cholinesterase activity);GO:0004305(ethanolamine kinase activity);GO:0005524(ATP binding);GO:0005737(cytoplasm);GO:0006580(ethanolamine metabolic process);GO:0006629(lipid metabolic process);GO:0006646(phosphatidylethanolamine biosynthetic process);GO:0006656(phosphatidylcholine biosynthetic process);GO:0006657(CDP-chol…	00564(Glycerophospholipid metabolism);05231(Choline metabolism in cancer);05231(Choline metabolism in cancer)	NA	NA	choline kinase alpha [Source:RGD Symbol;Acc:61944]	protein_coding	12.666	6.37893	14.4065	46.3841	46.6477	83.0399	0.189988	-2.39602	2.96749e-14	2.41455e-11	down	yes
ENSRNOG00000005975	Rpl30	ENSRNOT00000057587	GO:0002181(cytoplasmic translation);GO:0003723(RNA binding);GO:0003735(structural constituent of ribosome);GO:0005634(nucleus);GO:0005829(cytosol);GO:0005840(ribosome);GO:0014069(postsynaptic density);GO:0022625(cytosolic large ribosomal subunit);GO:0031640(killing of cells of other organism);GO:0035368(selenocysteine insertion sequence binding);GO:0042788(polysomal ribosome);GO:0050829(defense r…	03010(Ribosome)	K02908	NA	ribosomal protein L30 [Source:RGD Symbol;Acc:621201]	protein_coding	194.24	234.142	228.197	70.6882	73.8048	81.9741	2.89922	1.53567	2.20126e-13	1.67915e-10	up	yes
ENSRNOG00000000632	Cdk1	ENSRNOT00000000783;ENSRNOT00000081113;ENSRNOT00000086806	GO:0000086(G2/M transition of mitotic cell cycle);GO:0000166(nucleotide binding);GO:0000278(mitotic cell cycle);GO:0000307(cyclin-dependent protein kinase holoenzyme complex);GO:0003682(chromatin binding);GO:0004672(protein kinase activity);GO:0004674(protein serine/threonine kinase activity);GO:0004693(cyclin-dependent protein serine/threonine kinase activity);GO:0005515(protein binding);GO:0005…	04110(Cell cycle);04114(Oocyte meiosis);04115(p53 signaling pathway);04218(Cellular senescence);04540(Gap junction);04914(Progesterone-mediated oocyte maturation);05170(Human immunodeficiency virus 1 infection);05203(Viral carcinogenesis);05203(Viral carcinogenesis)	K02087	2.7.11.23;EC:2.7.11.22	cyclin-dependent kinase 1 [Source:RGD Symbol;Acc:2319]	protein_coding	0.0001	0.0001	0.034885	0.742019	0.825874	0.624407	0.0160038	-5.96545	4.65133e-13	3.33938e-10	down	yes
ENSRNOG00000008519	Dipk2a	ENSRNOT00000086491;ENSRNOT00000011263	GO:0000139(Golgi membrane);GO:0005576(extracellular region);GO:0005615(extracellular space);GO:0014066(regulation of phosphatidylinositol 3-kinase signaling);GO:0030126(COPI vesicle coat);GO:0030137(COPI-coated vesicle);GO:0034392(negative regulation of smooth muscle cell apoptotic process);GO:0060038(cardiac muscle cell proliferation);GO:1900020(positive regulation of protein kinase C activity);…	NA	NA	NA	divergent protein kinase domain 2A [Source:RGD Symbol;Acc:1309079]	protein_coding	1.47172	1.34817	1.16342	7.56674	4.51793	3.83835	0.25016	-1.99908	5.37917e-12	3.64738e-09	down	yes
ENSRNOG00000007713	Tmcc3	ENSRNOT00000010316;ENSRNOT00000080291	GO:0005783(endoplasmic reticulum);GO:0012505(endomembrane system);GO:0016020(membrane);GO:0016021(integral component of membrane);GO:0042802(identical protein binding);GO:0071889(14-3-3 protein binding);GO:0071889(14-3-3 protein binding)	NA	NA	NA	transmembrane and coiled-coil domain family 3 [Source:RGD Symbol;Acc:1307241]	protein_coding	0.919924	0.680934	1.34358	3.45536	3.24883	3.54354	0.287325	-1.79924	1.61753e-11	1.03905e-08	down	yes
ENSRNOG00000061527	Gck	ENSRNOT00000086343;ENSRNOT00000086474;ENSRNOT00000080147	GO:0000166(nucleotide binding);GO:0000287(magnesium ion binding);GO:0001678(cellular glucose homeostasis);GO:0003824(catalytic activity);GO:0004340(glucokinase activity);GO:0004396(hexokinase activity);GO:0005515(protein binding);GO:0005524(ATP binding);GO:0005536(glucose binding);GO:0005634(nucleus);GO:0005654(nucleoplasm);GO:0005737(cytoplasm);GO:0005739(mitochondrion);GO:0005829(cytosol);GO:00…	00010(Glycolysis / Gluconeogenesis);00052(Galactose metabolism);00500(Starch and sucrose metabolism);00520(Amino sugar and nucleotide sugar metabolism);00524(Neomycin, kanamycin and gentamicin biosynthesis);04910(Insulin signaling pathway);04911(Insulin secretion);04917(Prolactin signaling pathway);04922(Glucagon signaling pathway);04930(Type II diabetes mellitus);04950(Maturity onset diabetes of…	K12407	EC:2.7.1.2	glucokinase [Source:RGD Symbol;Acc:2670]	protein_coding	0.243905	0.225194	0.142815	5.6801	3.47294	0.802239	0.0614663	-4.02406	6.22233e-11	3.79718e-08	down	yes
ENSRNOG00000051056	AABR07063279	ENSRNOT00000076105	GO:0005576(extracellular region);GO:0005886(plasma membrane);GO:0050728(negative regulation of inflammatory response)	NA	NA	NA		protein_coding	1.2366	0.997096	0.807847	5.03703	4.53183	5.06097	0.2079	-2.26604	9.66035e-11	5.6145e-08	down	yes
ENSRNOG00000050994	Cttn	ENSRNOT00000028283;ENSRNOT00000090375;ENSRNOT00000047669	GO:0001726(ruffle);GO:0002102(podosome);GO:0005515(protein binding);GO:0005522(profilin binding);GO:0005737(cytoplasm);GO:0005856(cytoskeleton);GO:0005884(actin filament);GO:0005886(plasma membrane);GO:0005905(clathrin-coated pit);GO:0005925(focal adhesion);GO:0005938(cell cortex);GO:0006886(intracellular protein transport);GO:0006897(endocytosis);GO:0006898(receptor-mediated endocytosis);GO:0006…	04530(Tight junction);05100(Bacterial invasion of epithelial cells);05205(Proteoglycans in cancer);05205(Proteoglycans in cancer)	K06106	NA	cortactin [Source:RGD Symbol;Acc:619839]	protein_coding	0.0001	0.0001	0.0001	7.91053	7.27684	0.0001	1.97531e-05	-15.6276	3.06821e-10	1.70216e-07	down	yes
ENSRNOG00000006663	Usp2	ENSRNOT00000036051;ENSRNOT00000009975	GO:0000122(negative regulation of transcription by RNA polymerase II);GO:0004843(thiol-dependent ubiquitin-specific protease activity);GO:0005515(protein binding);GO:0005634(nucleus);GO:0005737(cytoplasm);GO:0005813(centrosome);GO:0005938(cell cortex);GO:0006508(proteolysis);GO:0006511(ubiquitin-dependent protein catabolic process);GO:0007049(cell cycle);GO:0007517(muscle organ development);GO:00…	NA	K11833	EC:3.4.19.12	ubiquitin specific peptidase 2 [Source:RGD Symbol;Acc:621073]	protein_coding	5.97529	11.1821	6.72223	2.08887	1.84616	2.83977	3.52476	1.81753	3.70814e-10	1.96773e-07	up	yes
ENSRNOG00000005464	Lgalsl	ENSRNOT00000008274	GO:0030246(carbohydrate binding)	NA	NA	NA	galectin-like [Source:RGD Symbol;Acc:1307414]	protein_coding	1.50709	1.3586	1.58154	5.8825	4.51578	3.56439	0.318509	-1.65059	7.24997e-10	3.68691e-07	down	yes
ENSRNOG00000014876	Lpin2	ENSRNOT00000020476;ENSRNOT00000082005	GO:0003713(transcription coactivator activity);GO:0005634(nucleus);GO:0005789(endoplasmic reticulum membrane);GO:0005829(cytosol);GO:0006629(lipid metabolic process);GO:0008195(phosphatidate phosphatase activity);GO:0009062(fatty acid catabolic process);GO:0016311(dephosphorylation);GO:0016787(hydrolase activity);GO:0019432(triglyceride biosynthetic process);GO:0032869(cellular response to insuli…	00561(Glycerolipid metabolism);00564(Glycerophospholipid metabolism);00564(Glycerophospholipid metabolism)	K15728	EC:3.1.3.4	lipin 2 [Source:RGD Symbol;Acc:1304588]	protein_coding	14.8462	25.9213	19.6703	5.24573	1.20679	1.51588	7.58469	2.92309	9.16806e-10	4.47585e-07	up	yes
ENSRNOG00000047158	Selenbp1	ENSRNOT00000071603	GO:0005515(protein binding);GO:0008430(selenium binding);GO:0018549(methanethiol oxidase activity);GO:0055114(oxidation-reduction process)	NA	K17285	NA	selenium binding protein 1 [Source:RGD Symbol;Acc:620571]	protein_coding	0.0001	0.0001	0.0001	50.2679	0.0001	44.0377	3.18115e-06	-18.262	1.33121e-09	6.05289e-07	down	yes
ENSRNOG00000030225	Clpx	ENSRNOT00000048302	GO:0000166(nucleotide binding);GO:0003674(molecular_function);GO:0004176(ATP-dependent peptidase activity);GO:0005524(ATP binding);GO:0005575(cellular_component);GO:0005654(nucleoplasm);GO:0005739(mitochondrion);GO:0005759(mitochondrial matrix);GO:0005829(cytosol);GO:0006457(protein folding);GO:0006508(proteolysis);GO:0008150(biological_process);GO:0009368(endopeptidase Clp complex);GO:0009841(mi…	NA	K03544	NA	caseinolytic mitochondrial matrix peptidase chaperone subunit [Source:RGD Symbol;Acc:1304883]	protein_coding	47.0571	34.9549	43.3578	98.2083	97.6938	106.047	0.415202	-1.26812	1.33903e-09	6.05289e-07	down	yes
ENSRNOG00000002478	Insig2	ENSRNOT00000003391	GO:0005783(endoplasmic reticulum);GO:0005789(endoplasmic reticulum membrane);GO:0006629(lipid metabolic process);GO:0006641(triglyceride metabolic process);GO:0006695(cholesterol biosynthetic process);GO:0006991(response to sterol depletion);GO:0008134(transcription factor binding);GO:0008142(oxysterol binding);GO:0008202(steroid metabolic process);GO:0008203(cholesterol metabolic process);GO:000…	NA	NA	NA	insulin induced gene 2 [Source:RGD Symbol;Acc:631417]	protein_coding	114.662	88.728	104.565	225.44	228.915	280.98	0.418795	-1.25568	2.34511e-09	1.02222e-06	down	yes
ENSRNOG00000016353	Nim1k	ENSRNOT00000021964	GO:0000166(nucleotide binding);GO:0000287(magnesium ion binding);GO:0004672(protein kinase activity);GO:0004674(protein serine/threonine kinase activity);GO:0005524(ATP binding);GO:0005634(nucleus);GO:0005737(cytoplasm);GO:0006468(protein phosphorylation);GO:0035556(intracellular signal transduction)	NA	K16310	EC:2.7.11.1	NIM1 serine/threonine protein kinase [Source:RGD Symbol;Acc:1308116]	protein_coding	5.99761	2.47375	3.92061	11.4515	15.6975	15.2964	0.291951	-1.7762	5.15066e-09	2.16772e-06	down	yes
ENSRNOG00000051171	G6pc	ENSRNOT00000076390;ENSRNOT00000028033;ENSRNOT00000085831	GO:0004346(glucose-6-phosphatase activity);GO:0005783(endoplasmic reticulum);GO:0005789(endoplasmic reticulum membrane);GO:0005977(glycogen metabolic process);GO:0005980(glycogen catabolic process);GO:0006094(gluconeogenesis);GO:0006641(triglyceride metabolic process);GO:0006796(phosphate-containing compound metabolic process);GO:0008202(steroid metabolic process);GO:0009743(response to carbohydr…	00010(Glycolysis / Gluconeogenesis);00052(Galactose metabolism);00500(Starch and sucrose metabolism);04068(FoxO signaling pathway);04151(PI3K-Akt signaling pathway);04152(AMPK signaling pathway);04910(Insulin signaling pathway);04920(Adipocytokine signaling pathway);04922(Glucagon signaling pathway);04931(Insulin resistance);04973(Carbohydrate digestion and absorption);04973(Carbohydrate digestio…	K01084	EC:3.1.3.9	glucose-6-phosphatase, catalytic subunit [Source:RGD Symbol;Acc:2644]	retained_intron;protein_coding	173.558	217.166	218.319	481.162	453.445	478.045	0.431135	-1.21379	5.38007e-09	2.18879e-06	down	yes
ENSRNOG00000025923	LOC103693776	ENSRNOT00000052002	GO:0005634(nucleus);GO:0008270(zinc ion binding);GO:0030374(nuclear receptor transcription coactivator activity);GO:0043596(nuclear replication fork);GO:0045944(positive regulation of transcription by RNA polymerase II);GO:0046872(metal ion binding);GO:0048096(chromatin-mediated maintenance of transcription)	NA	K22403	NA	zinc finger MIZ domain-containing protein 2 [Source:RGD Symbol;Acc:9124587]	protein_coding	4.46447	3.49614	4.31417	9.06829	11.2499	9.63502	0.409798	-1.28701	6.27656e-09	2.47114e-06	down	yes
ENSRNOG00000042838	Junb	ENSRNOT00000067780	GO:0000977(RNA polymerase II regulatory region sequence-specific DNA binding);GO:0000978(RNA polymerase II cis-regulatory region sequence-specific DNA binding);GO:0001228(DNA-binding transcription activator activity, RNA polymerase II-specific);GO:0001570(vasculogenesis);GO:0001649(osteoblast differentiation);GO:0001701(in utero embryonic development);GO:0001829(trophectodermal cell differentiati…	04380(Osteoclast differentiation);04668(TNF signaling pathway)	K09028	NA	JunB proto-oncogene, AP-1 transcription factor subunit [Source:RGD Symbol;Acc:2944]	protein_coding	15.8475	22.1866	40.376	7.7469	7.93946	7.78866	3.34015	1.73991	6.8153e-09	2.5994e-06	up	yes
ENSRNOG00000009488	Cyp7a1	ENSRNOT00000012819	GO:0004497(monooxygenase activity);GO:0005506(iron ion binding);GO:0005783(endoplasmic reticulum);GO:0005789(endoplasmic reticulum membrane);GO:0006629(lipid metabolic process);GO:0006699(bile acid biosynthetic process);GO:0006707(cholesterol catabolic process);GO:0008123(cholesterol 7-alpha-monooxygenase activity);GO:0008202(steroid metabolic process);GO:0008203(cholesterol metabolic process);GO…	00120(Primary bile acid biosynthesis);00140(Steroid hormone biosynthesis);03320(PPAR signaling pathway);04976(Bile secretion);04979(Cholesterol metabolism)	K00489	EC:1.14.14.23	cytochrome P450 family 7 subfamily A member 1 [Source:RGD Symbol;Acc:2482]	protein_coding	39.5513	32.1473	28.0956	13.0027	4.10265	6.7482	4.18362	2.06475	9.13545e-09	3.37873e-06	up	yes
ENSRNOG00000049593	Wbp11l1	ENSRNOT00000072528;ENSRNOT00000082312	GO:0005634(nucleus);GO:0005681(spliceosomal complex);GO:0005737(cytoplasm);GO:0006364(rRNA processing);GO:0006396(RNA processing);GO:0006397(mRNA processing);GO:0008380(RNA splicing);GO:0016607(nuclear speck);GO:0019888(protein phosphatase regulator activity);GO:0043666(regulation of phosphoprotein phosphatase activity);GO:0045292(mRNA cis splicing, via spliceosome);GO:0050699(WW domain binding);…	03040(Spliceosome);03040(Spliceosome)	K12866	NA	WW domain-binding protein 11-like 1 [Source:RGD Symbol;Acc:9435381]	protein_coding	0.0001	0.0001	0.0001	0.0001	4.22019	4.58312	3.40777e-05	-14.8408	9.85634e-09	3.53814e-06	down	yes
ENSRNOG00000017808	Klf15	ENSRNOT00000024011	GO:0000976(transcription regulatory region sequence-specific DNA binding);GO:0000977(RNA polymerase II regulatory region sequence-specific DNA binding);GO:0000978(RNA polymerase II cis-regulatory region sequence-specific DNA binding);GO:0000981(DNA-binding transcription factor activity, RNA polymerase II-specific);GO:0001228(DNA-binding transcription activator activity, RNA polymerase II-specific…	NA	K09210	NA	Kruppel-like factor 15 [Source:RGD Symbol;Acc:70918]	protein_coding	40.0864	61.2743	42.4462	16.3467	20.9714	19.3715	2.53675	1.34298	1.15088e-08	4.01329e-06	up	yes
ENSRNOG00000036397	AABR07027722	ENSRNOT00000054512	NA	NA	NA	NA		miRNA	7.07216	3.97936	6.4219	4.93578	813.689	450.951	0.0137632	-6.18304	1.21513e-08	4.11963e-06	down	yes
ENSRNOG00000032508	Acot5	ENSRNOT00000013760	GO:0000038(very long-chain fatty acid metabolic process);GO:0001676(long-chain fatty acid metabolic process);GO:0005777(peroxisome);GO:0005829(cytosol);GO:0006629(lipid metabolic process);GO:0006631(fatty acid metabolic process);GO:0006637(acyl-CoA metabolic process);GO:0016790(thiolester hydrolase activity);GO:0032788(saturated monocarboxylic acid metabolic process);GO:0032789(unsaturated monoca…	00062(Fatty acid elongation);01040(Biosynthesis of unsaturated fatty acids)	K01068	EC:3.1.2.2	acyl-CoA thioesterase 5 [Source:RGD Symbol;Acc:1565917]	protein_coding	10.6371	8.24311	13.5482	31.3834	21.041	47.8022	0.323551	-1.62794	2.35815e-08	7.7787e-06	down	yes
ENSRNOG00000004247	Nhp2	ENSRNOT00000064984	GO:0000454(snoRNA guided rRNA pseudouridine synthesis);GO:0000469(cleavage involved in rRNA processing);GO:0000470(maturation of LSU-rRNA);GO:0003723(RNA binding);GO:0003730(mRNA 3'-UTR binding);GO:0005634(nucleus);GO:0005697(telomerase holoenzyme complex);GO:0005730(nucleolus);GO:0007004(telomere maintenance via telomerase);GO:0031118(rRNA pseudouridine synthesis);GO:0031120(snRNA pseudouridine …	03008(Ribosome biogenesis in eukaryotes)	K11129	NA	NHP2 ribonucleoprotein [Source:RGD Symbol;Acc:1309435]	protein_coding	7.97104	0.0001	14.1232	0.0001	0.0001	0.0001	73647.9	16.1684	3.39173e-08	1.06937e-05	up	yes
ENSRNOG00000014490	Bdh2	ENSRNOT00000019507	GO:0003858(3-hydroxybutyrate dehydrogenase activity);GO:0005737(cytoplasm);GO:0005829(cytosol);GO:0006635(fatty acid beta-oxidation);GO:0016491(oxidoreductase activity);GO:0030855(epithelial cell differentiation);GO:0051287(NAD binding);GO:0055114(oxidation-reduction process)	00072(Synthesis and degradation of ketone bodies);00650(Butanoate metabolism)	K00019	EC:1.1.1.30	3-hydroxybutyrate dehydrogenase 2 [Source:RGD Symbol;Acc:1309898]	protein_coding	7.66288	10.4462	11.5491	3.57427	2.60011	3.47299	3.07423	1.62023	3.41709e-08	1.06937e-05	up	yes
ENSRNOG00000006052	Sulf2	ENSRNOT00000008478	GO:0001822(kidney development);GO:0002063(chondrocyte development);GO:0003094(glomerular filtration);GO:0003824(catalytic activity);GO:0004065(arylsulfatase activity);GO:0005509(calcium ion binding);GO:0005539(glycosaminoglycan binding);GO:0005615(extracellular space);GO:0005783(endoplasmic reticulum);GO:0005794(Golgi apparatus);GO:0005795(Golgi stack);GO:0005886(plasma membrane);GO:0008449(N-ace…	NA	K14607	EC:3.1.6.-	sulfatase 2 [Source:RGD Symbol;Acc:1305078]	protein_coding	11.2999	24.4872	25.0656	6.48365	7.05159	7.30897	2.9194	1.54567	4.48534e-08	1.36859e-05	up	yes
ENSRNOG00000048874	Gckr	ENSRNOT00000073228;ENSRNOT00000076268	GO:0001678(cellular glucose homeostasis);GO:0004857(enzyme inhibitor activity);GO:0005515(protein binding);GO:0005634(nucleus);GO:0005654(nucleoplasm);GO:0005737(cytoplasm);GO:0005739(mitochondrion);GO:0005829(cytosol);GO:0005975(carbohydrate metabolic process);GO:0006006(glucose metabolic process);GO:0006606(protein import into nucleus);GO:0009750(response to fructose);GO:0019899(enzyme binding)…	NA	NA	NA	glucokinase regulator [Source:RGD Symbol;Acc:2671]	protein_coding;retained_intron	54.9251	40.903	38.0223	103.783	105.679	99.2195	0.433619	-1.2055	4.61354e-08	1.37337e-05	down	yes
ENSRNOG00000048049	LOC103689951	ENSRNOT00000054858	GO:0005515(protein binding);GO:0048786(presynaptic active zone);GO:0050808(synapse organization)	NA	NA	NA	liprin-alpha-1-like [Source:RGD Symbol;Acc:9445271]	protein_coding	0.0001	0.0001	0.0001	3.03155	2.78601	0.0001	5.15671e-05	-14.2432	7.18495e-08	2.07596e-05	down	yes
ENSRNOG00000053787	Mdfic	ENSRNOT00000082453	GO:0005634(nucleus);GO:0005730(nucleolus);GO:0005737(cytoplasm);GO:0007257(activation of JUN kinase activity);GO:0008134(transcription factor binding);GO:0030111(regulation of Wnt signaling pathway);GO:0030332(cyclin binding);GO:0030957(Tat protein binding);GO:0042308(negative regulation of protein import into nucleus);GO:0045892(negative regulation of transcription, DNA-templated);GO:0045893(pos…	NA	NA	NA	MyoD family inhibitor domain containing [Source:RGD Symbol;Acc:1309532]	protein_coding	4.63671	4.21801	4.66242	8.64136	9.56238	12.4915	0.440365	-1.18323	7.42808e-08	2.07596e-05	down	yes
ENSRNOG00000019383	Tef	ENSRNOT00000026258;ENSRNOT00000086355	GO:0000977(RNA polymerase II regulatory region sequence-specific DNA binding);GO:0000978(RNA polymerase II cis-regulatory region sequence-specific DNA binding);GO:0001228(DNA-binding transcription activator activity, RNA polymerase II-specific);GO:0003677(DNA binding);GO:0003690(double-stranded DNA binding);GO:0003700(DNA-binding transcription factor activity);GO:0005634(nucleus);GO:0006355(regul…	NA	NA	NA	TEF transcription factor, PAR bZIP family member [Source:RGD Symbol;Acc:3841]	protein_coding	16.9306	20.1033	16.8453	8.90236	7.272	6.44482	2.38202	1.25218	7.48401e-08	2.07596e-05	up	yes
ENSRNOG00000009019	Slc6a6	ENSRNOT00000012875;ENSRNOT00000086982	GO:0005328(neurotransmitter:sodium symporter activity);GO:0005368(taurine transmembrane transporter activity);GO:0005369(taurine:sodium symporter activity);GO:0005515(protein binding);GO:0005886(plasma membrane);GO:0005887(integral component of plasma membrane);GO:0006836(neurotransmitter transport);GO:0015185(gamma-aminobutyric acid transmembrane transporter activity);GO:0015293(symporter activi…	NA	K05039	NA	solute carrier family 6 member 6 [Source:RGD Symbol;Acc:61912]	protein_coding	0.432733	0.48348	0.571647	1.50706	1.93598	2.31205	0.25853	-1.9516	9.21829e-08	2.50021e-05	down	yes
ENSRNOG00000016595	Hhex	ENSRNOT00000022384	GO:0000122(negative regulation of transcription by RNA polymerase II);GO:0000976(transcription regulatory region sequence-specific DNA binding);GO:0000977(RNA polymerase II regulatory region sequence-specific DNA binding);GO:0000978(RNA polymerase II cis-regulatory region sequence-specific DNA binding);GO:0000981(DNA-binding transcription factor activity, RNA polymerase II-specific);GO:0001227(DN…	04950(Maturity onset diabetes of the young);05202(Transcriptional misregulation in cancer)	K08024	NA	hematopoietically expressed homeobox [Source:RGD Symbol;Acc:619932]	protein_coding	58.2415	34.0749	83.829	20.7027	18.53	22.8984	2.83506	1.50338	9.9872e-08	2.64987e-05	up	yes
ENSRNOG00000020254	Per2	ENSRNOT00000027506	GO:0000122(negative regulation of transcription by RNA polymerase II);GO:0000976(transcription regulatory region sequence-specific DNA binding);GO:0000978(RNA polymerase II cis-regulatory region sequence-specific DNA binding);GO:0001222(transcription corepressor binding);GO:0002931(response to ischemia);GO:0003713(transcription coactivator activity);GO:0005515(protein binding);GO:0005634(nucleus)…	04710(Circadian rhythm);04713(Circadian entrainment);05202(Transcriptional misregulation in cancer);05221(Acute myeloid leukemia)	K02633	NA	period circadian regulator 2 [Source:RGD Symbol;Acc:61945]	protein_coding	4.11746	5.78267	5.82583	2.53914	1.43836	1.36958	2.94104	1.55632	1.18364e-07	3.03555e-05	up	yes
ENSRNOG00000008829	Sorbs3	ENSRNOT00000012056	GO:0000122(negative regulation of transcription by RNA polymerase II);GO:0005515(protein binding);GO:0005634(nucleus);GO:0005737(cytoplasm);GO:0005925(focal adhesion);GO:0007015(actin filament organization);GO:0007155(cell adhesion);GO:0008134(transcription factor binding);GO:0017166(vinculin binding);GO:0031589(cell-substrate adhesion);GO:0043410(positive regulation of MAPK cascade);GO:0051496(p…	NA	NA	NA	sorbin and SH3 domain containing 3 [Source:RGD Symbol;Acc:628900]	protein_coding	18.4897	20.5859	36.8484	9.04462	9.64057	5.67651	3.11654	1.63994	1.19382e-07	3.03555e-05	up	yes
ENSRNOG00000019996	Slc16a1	ENSRNOT00000027234	GO:0005515(protein binding);GO:0005813(centrosome);GO:0005886(plasma membrane);GO:0005887(integral component of plasma membrane);GO:0006629(lipid metabolic process);GO:0007098(centrosome cycle);GO:0008028(monocarboxylic acid transmembrane transporter activity);GO:0009925(basal plasma membrane);GO:0015129(lactate transmembrane transporter activity);GO:0015293(symporter activity);GO:0015718(monocar…	NA	K08179	NA	solute carrier family 16 member 1 [Source:RGD Symbol;Acc:3690]	protein_coding	20.9098	12.4069	15.4576	37.5335	47.452	34.7695	0.407284	-1.29589	1.70674e-07	4.25117e-05	down	yes
ENSRNOG00000020501	Tjp3	ENSRNOT00000089004;ENSRNOT00000027847	GO:0005515(protein binding);GO:0005634(nucleus);GO:0005654(nucleoplasm);GO:0005829(cytosol);GO:0005886(plasma membrane);GO:0005911(cell-cell junction);GO:0005923(bicellular tight junction);GO:0016020(membrane);GO:0016324(apical plasma membrane);GO:0030054(cell junction);GO:2000045(regulation of G1/S transition of mitotic cell cycle);GO:2000045(regulation of G1/S transition of mitotic cell cycle)	04530(Tight junction);04530(Tight junction)	K06097	NA	tight junction protein 3 [Source:RGD Symbol;Acc:1309247]	protein_coding	2.40443	1.92978	2.13192	5.55922	5.22328	4.22464	0.43087	-1.21467	2.1545e-07	5.25914e-05	down	yes
ENSRNOG00000046020	AC115277	ENSRNOT00000054630	NA	NA	NA	NA		miRNA	44.6696	0.027411	38.9607	0.071135	0.056732	0.102393	363.318	8.50509	2.46578e-07	5.90095e-05	up	yes
ENSRNOG00000046912	Nr1d2	ENSRNOT00000081845;ENSRNOT00000071751	GO:0000122(negative regulation of transcription by RNA polymerase II);GO:0000977(RNA polymerase II regulatory region sequence-specific DNA binding);GO:0000978(RNA polymerase II cis-regulatory region sequence-specific DNA binding);GO:0000987(cis-regulatory region sequence-specific DNA binding);GO:0001227(DNA-binding transcription repressor activity, RNA polymerase II-specific);GO:0003677(DNA bindi…	NA	K08531	NA	nuclear receptor subfamily 1, group D, member 2 [Source:RGD Symbol;Acc:628828]	protein_coding	9.99827	11.8495	12.7814	3.84844	4.36059	6.63153	2.33342	1.22244	2.55509e-07	5.94264e-05	up	yes
ENSRNOG00000009715	Me1	ENSRNOT00000013244;ENSRNOT00000078977	GO:0004470(malic enzyme activity);GO:0004471(malate dehydrogenase (decarboxylating) (NAD+) activity);GO:0004473(malate dehydrogenase (decarboxylating) (NADP+) activity);GO:0006108(malate metabolic process);GO:0016491(oxidoreductase activity);GO:0030145(manganese ion binding);GO:0042802(identical protein binding);GO:0046872(metal ion binding);GO:0051287(NAD binding);GO:0055114(oxidation-reduction …	00620(Pyruvate metabolism);03320(PPAR signaling pathway);03320(PPAR signaling pathway)	K00029	EC:1.1.1.40	malic enzyme 1 [Source:RGD Symbol;Acc:3074]	protein_coding	5.63432	4.45049	4.46008	21.4049	8.8085	13.1951	0.33507	-1.57746	2.58058e-07	5.94264e-05	down	yes
ENSRNOG00000047520	AABR07048475	ENSRNOT00000076466	GO:0005576(extracellular region);GO:0036094(small molecule binding)	NA	NA	NA		protein_coding	37.7218	16.9785	43.9747	3.7331	4.10214	11.4826	5.10798	2.35275	2.96765e-07	6.70743e-05	up	yes
ENSRNOG00000002520	Litaf	ENSRNOT00000003412	GO:0000139(Golgi membrane);GO:0000978(RNA polymerase II cis-regulatory region sequence-specific DNA binding);GO:0001228(DNA-binding transcription activator activity, RNA polymerase II-specific);GO:0001817(regulation of cytokine production);GO:0003677(DNA binding);GO:0005576(extracellular region);GO:0005634(nucleus);GO:0005654(nucleoplasm);GO:0005737(cytoplasm);GO:0005764(lysosome);GO:0005765(lyso…	04142(Lysosome)	K19363	NA	lipopolysaccharide-induced TNF factor [Source:RGD Symbol;Acc:69294]	protein_coding	26.0243	24.7699	20.5326	51.1032	53.0999	48.3309	0.467613	-1.09661	3.07606e-07	6.82606e-05	down	yes
ENSRNOG00000000588	Slc16a10	ENSRNOT00000000718;ENSRNOT00000087226	GO:0005887(integral component of plasma membrane);GO:0006590(thyroid hormone generation);GO:0015173(aromatic amino acid transmembrane transporter activity);GO:0015349(thyroid hormone transmembrane transporter activity);GO:0015801(aromatic amino acid transport);GO:0016020(membrane);GO:0016021(integral component of membrane);GO:0016323(basolateral plasma membrane);GO:0022857(transmembrane transport…	04919(Thyroid hormone signaling pathway);04974(Protein digestion and absorption);04974(Protein digestion and absorption)	K08187	NA	solute carrier family 16 member 10 [Source:RGD Symbol;Acc:69197]	protein_coding	4.76293	6.29285	8.97579	2.36123	2.82997	1.46727	3.00844	1.58901	4.42165e-07	9.63682e-05	up	yes
ENSRNOG00000054513	Zmiz2	ENSRNOT00000077428	GO:0005634(nucleus);GO:0008270(zinc ion binding);GO:0030374(nuclear receptor transcription coactivator activity);GO:0043596(nuclear replication fork);GO:0045944(positive regulation of transcription by RNA polymerase II);GO:0046872(metal ion binding);GO:0048096(chromatin-mediated maintenance of transcription)	NA	K22403	NA	zinc finger, MIZ-type containing 2 [Source:RGD Symbol;Acc:1309256]	protein_coding	4.94345	3.42794	4.64053	8.84381	10.1906	9.64946	0.453632	-1.1404	7.14753e-07	0.000153045	down	yes
ENSRNOG00000011016	Slc7a2	ENSRNOT00000015127;ENSRNOT00000014809	GO:0000064(L-ornithine transmembrane transporter activity);GO:0002537(nitric oxide production involved in inflammatory response);GO:0005289(high-affinity arginine transmembrane transporter activity);GO:0005292(high-affinity lysine transmembrane transporter activity);GO:0005886(plasma membrane);GO:0006809(nitric oxide biosynthetic process);GO:0006865(amino acid transport);GO:0015171(amino acid tra…	NA	K13864	NA	solute carrier family 7 member 2 [Source:RGD Symbol;Acc:68387]	protein_coding	60.2337	71.6706	51.3959	31.427	26.5434	28.519	2.11934	1.08361	7.47699e-07	0.000157339	up	yes
ENSRNOG00000015807	Pyroxd2	ENSRNOT00000021257	GO:0016491(oxidoreductase activity);GO:0055114(oxidation-reduction process)	NA	NA	NA	pyridine nucleotide-disulphide oxidoreductase domain 2 [Source:RGD Symbol;Acc:1303232]	protein_coding	19.2976	35.0761	37.4134	12.0731	11.7587	13.1989	2.47868	1.30957	8.03309e-07	0.000166176	up	yes
ENSRNOG00000004307	Tor3a	ENSRNOT00000005726	GO:0000166(nucleotide binding);GO:0005524(ATP binding);GO:0005635(nuclear envelope);GO:0005737(cytoplasm);GO:0005783(endoplasmic reticulum);GO:0005788(endoplasmic reticulum lumen);GO:0016887(ATPase activity)	NA	K23000	NA	torsin family 3, member A [Source:RGD Symbol;Acc:1310101]	protein_coding	4.01295	1.66535	6.46448	22.8012	9.06897	18.9381	0.238992	-2.06496	9.6253e-07	0.000195795	down	yes
ENSRNOG00000027833	Fnip2	ENSRNOT00000090152;ENSRNOT00000038543	GO:0000122(negative regulation of transcription by RNA polymerase II);GO:0001932(regulation of protein phosphorylation);GO:0005737(cytoplasm);GO:0005764(lysosome);GO:0005765(lysosomal membrane);GO:0005829(cytosol);GO:0006468(protein phosphorylation);GO:0008630(intrinsic apoptotic signaling pathway in response to DNA damage);GO:0010823(negative regulation of mitochondrion organization);GO:0016020(…	04150(mTOR signaling pathway);04150(mTOR signaling pathway)	K20401	NA	folliculin interacting protein 2 [Source:RGD Symbol;Acc:1562174]	protein_coding	9.4724	8.60108	11.1276	4.12687	5.06489	2.83658	2.42769	1.27959	9.84096e-07	0.0001969	up	yes
ENSRNOG00000030387	Kng1	ENSRNOT00000084867;ENSRNOT00000080949;ENSRNOT00000080562;ENSRNOT00000078131;ENSRNOT00000058479	GO:0004866(endopeptidase inhibitor activity);GO:0004869(cysteine-type endopeptidase inhibitor activity);GO:0005102(signaling receptor binding);GO:0005576(extracellular region);GO:0005615(extracellular space);GO:0006953(acute-phase response);GO:0006954(inflammatory response);GO:0007162(negative regulation of cell adhesion);GO:0007204(positive regulation of cytosolic calcium ion concentration);GO:0…	04022(cGMP-PKG signaling pathway);04071(Sphingolipid signaling pathway);04080(Neuroactive ligand-receptor interaction);04610(Complement and coagulation cascades);04750(Inflammatory mediator regulation of TRP channels);04810(Regulation of actin cytoskeleton);05142(Chagas disease (American trypanosomiasis));05143(African trypanosomiasis);05200(Pathways in cancer);05200(Pathways in cancer)	K03898	NA	kininogen 1 [Source:RGD Symbol;Acc:1359376]	protein_coding	653.424	1223.68	1125.54	360.806	404.959	496.535	2.3787	1.25017	1.01673e-06	0.000197183	up	yes
ENSRNOG00000023465	Depp1	ENSRNOT00000018133	GO:0005737(cytoplasm);GO:0005739(mitochondrion);GO:0005777(peroxisome);GO:0010506(regulation of autophagy);GO:0043231(intracellular membrane-bounded organelle)	NA	NA	NA	DEPP1, autophagy regulator [Source:RGD Symbol;Acc:1565700]	protein_coding	21.372	36.2967	23.6232	48.3139	93.5489	71.1865	0.381564	-1.39	1.01783e-06	0.000197183	down	yes
ENSRNOG00000016456	Il33	ENSRNOT00000022056	GO:0000122(negative regulation of transcription by RNA polymerase II);GO:0002112(interleukin-33 receptor binding);GO:0002281(macrophage activation involved in immune response);GO:0002282(microglial cell activation involved in immune response);GO:0002686(negative regulation of leukocyte migration);GO:0002826(negative regulation of T-helper 1 type immune response);GO:0002830(positive regulation of …	04060(Cytokine-cytokine receptor interaction);04217(Necroptosis);04623(Cytosolic DNA-sensing pathway);05164(Influenza A)	K12967	NA	interleukin 33 [Source:RGD Symbol;Acc:1311155]	protein_coding	20.1645	25.0619	42.8558	11.0562	13.0311	10.3296	2.55928	1.35574	1.04137e-06	0.000198593	up	yes
ENSRNOG00000000036	Klhdc8a	ENSRNOT00000000041	GO:0005515(protein binding)	NA	NA	NA	kelch domain containing 8A [Source:RGD Symbol;Acc:1305132]	protein_coding	1.33779	1.05056	1.95279	3.89585	3.39101	4.15795	0.37931	-1.39855	1.11755e-06	0.000208242	down	yes
ENSRNOG00000059579	Gpt2	ENSRNOT00000077275;ENSRNOT00000078348	GO:0003824(catalytic activity);GO:0004021(L-alanine:2-oxoglutarate aminotransferase activity);GO:0005615(extracellular space);GO:0005739(mitochondrion);GO:0006103(2-oxoglutarate metabolic process);GO:0009058(biosynthetic process);GO:0030170(pyridoxal phosphate binding);GO:0032869(cellular response to insulin stimulus);GO:0033574(response to testosterone);GO:0042594(response to starvation);GO:0042…	00220(Arginine biosynthesis);00250(Alanine, aspartate and glutamate metabolism);00250(Alanine, aspartate and glutamate metabolism)	K00814	EC:2.6.1.2	glutamic--pyruvic transaminase 2 [Source:RGD Symbol;Acc:1305462]	protein_coding	60.1986	50.6971	50.0116	29.164	25.1978	23.2256	2.07388	1.05233	1.12609e-06	0.000208242	up	yes
ENSRNOG00000010813	Tspan14	ENSRNOT00000014772	GO:0005886(plasma membrane);GO:0005887(integral component of plasma membrane);GO:0009986(cell surface);GO:0016020(membrane);GO:0016021(integral component of membrane);GO:0019899(enzyme binding);GO:0045747(positive regulation of Notch signaling pathway);GO:0051604(protein maturation);GO:0072659(protein localization to plasma membrane);GO:0097197(tetraspanin-enriched microdomain)	NA	K17296	NA	tetraspanin 14 [Source:RGD Symbol;Acc:1305714]	protein_coding	10.2089	11.4473	8.65498	24.9757	23.6874	18.7651	0.449532	-1.1535	1.18048e-06	0.000215041	down	yes
ENSRNOG00000023778	Gcnt2	ENSRNOT00000060335;ENSRNOT00000078010;ENSRNOT00000035448	GO:0000139(Golgi membrane);GO:0003674(molecular_function);GO:0005575(cellular_component);GO:0005794(Golgi apparatus);GO:0006486(protein glycosylation);GO:0007179(transforming growth factor beta receptor signaling pathway);GO:0008109(N-acetyllactosaminide beta-1,6-N-acetylglucosaminyltransferase activity);GO:0008150(biological_process);GO:0008284(positive regulation of cell population proliferatio…	00601(Glycosphingolipid biosynthesis - lacto and neolacto series);00601(Glycosphingolipid biosynthesis - lacto and neolacto series)	K00742	EC:2.4.1.150	glucosaminyl (N-acetyl) transferase 2 (I blood group) [Source:RGD Symbol;Acc:1303198]	protein_coding	1.11595	3.12394	4.44911	0.775927	0.778845	0.821862	3.65601	1.87027	1.3535e-06	0.000242933	up	yes
ENSRNOG00000023657	Gprin3	ENSRNOT00000039316	NA	NA	NA	NA	GPRIN family member 3 [Source:RGD Symbol;Acc:1565690]	protein_coding	2.35583	2.87323	3.4744	0.887438	1.08287	0.479459	3.55277	1.82894	1.55201e-06	0.000274526	up	yes
ENSRNOG00000013737	Bcar3	ENSRNOT00000065111	GO:0001784(phosphotyrosine residue binding);GO:0002089(lens morphogenesis in camera-type eye);GO:0005085(guanyl-nucleotide exchange factor activity);GO:0005515(protein binding);GO:0005737(cytoplasm);GO:0005925(focal adhesion);GO:0007165(signal transduction);GO:0007264(small GTPase mediated signal transduction);GO:0008286(insulin receptor signaling pathway);GO:0019900(kinase binding);GO:0030054(ce…	NA	NA	NA	BCAR3 adaptor protein, NSP family member [Source:RGD Symbol;Acc:1311688]	protein_coding	8.36933	10.6371	7.66895	4.5118	3.8641	3.2823	2.28812	1.19417	1.70686e-06	0.000297603	up	yes
ENSRNOG00000013090	Gadd45g	ENSRNOT00000018252	GO:0000185(activation of MAPKKK activity);GO:0000186(activation of MAPKK activity);GO:0005634(nucleus);GO:0005737(cytoplasm);GO:0006469(negative regulation of protein kinase activity);GO:0006915(apoptotic process);GO:0007275(multicellular organism development);GO:0030154(cell differentiation);GO:0042802(identical protein binding);GO:0043065(positive regulation of apoptotic process);GO:0046330(pos…	04010(MAPK signaling pathway);04068(FoxO signaling pathway);04110(Cell cycle);04115(p53 signaling pathway);04210(Apoptosis);04218(Cellular senescence);05169(Epstein-Barr virus infection);05200(Pathways in cancer);05202(Transcriptional misregulation in cancer);05210(Colorectal cancer);05212(Pancreatic cancer);05213(Endometrial cancer);05214(Glioma);05216(Thyroid cancer);05217(Basal cell carcinoma)…	K04402	NA	growth arrest and DNA-damage-inducible, gamma [Source:RGD Symbol;Acc:1311796]	protein_coding	89.9436	17.4644	128.259	10.4943	16.891	18.8285	5.0995	2.35036	1.92813e-06	0.000326845	up	yes
ENSRNOG00000020698	Rnd2	ENSRNOT00000028089	GO:0003924(GTPase activity);GO:0005515(protein binding);GO:0005525(GTP binding);GO:0005737(cytoplasm);GO:0005769(early endosome);GO:0005856(cytoskeleton);GO:0005886(plasma membrane);GO:0005938(cell cortex);GO:0007015(actin filament organization);GO:0007264(small GTPase mediated signal transduction);GO:0008360(regulation of cell shape);GO:0016477(cell migration);GO:0019901(protein kinase binding);…	NA	K07858	NA	Rho family GTPase 2 [Source:RGD Symbol;Acc:1306172]	protein_coding	32.339	36.8908	49.3087	20.4557	16.059	18.7953	2.14317	1.09974	2.43306e-06	0.000406788	up	yes
ENSRNOG00000000955	Lnx2	ENSRNOT00000001263	GO:0005515(protein binding);GO:0030165(PDZ domain binding);GO:0042802(identical protein binding);GO:0046872(metal ion binding)	NA	K10692	EC:2.3.2.27	ligand of numb-protein X 2 [Source:RGD Symbol;Acc:1308222]	protein_coding	2.64133	2.12131	2.25079	5.16042	4.96828	4.50277	0.479339	-1.06088	2.533e-06	0.000417773	down	yes
ENSRNOG00000011815	Sgk1	ENSRNOT00000016121;ENSRNOT00000040736;ENSRNOT00000061157;ENSRNOT00000083452	GO:0000166(nucleotide binding);GO:0004672(protein kinase activity);GO:0004674(protein serine/threonine kinase activity);GO:0004712(protein serine/threonine/tyrosine kinase activity);GO:0005524(ATP binding);GO:0005829(cytosol);GO:0006468(protein phosphorylation);GO:0006974(cellular response to DNA damage stimulus);GO:0016301(kinase activity);GO:0016310(phosphorylation);GO:0016607(nuclear speck);GO…	04068(FoxO signaling pathway);04150(mTOR signaling pathway);04151(PI3K-Akt signaling pathway);04960(Aldosterone-regulated sodium reabsorption);04960(Aldosterone-regulated sodium reabsorption)	K13302	EC:2.7.11.1	serum/glucocorticoid regulated kinase 1 [Source:RGD Symbol;Acc:3668]	protein_coding	6.48466	7.28305	8.11825	29.7286	17.4319	12.0556	0.369595	-1.43598	2.62473e-06	0.000427132	down	yes
ENSRNOG00000011875	Slc2a2	ENSRNOT00000015866;ENSRNOT00000091221	GO:0005353(fructose transmembrane transporter activity);GO:0005355(glucose transmembrane transporter activity);GO:0005737(cytoplasm);GO:0005886(plasma membrane);GO:0005903(brush border);GO:0005911(cell-cell junction);GO:0008643(carbohydrate transport);GO:0015755(fructose transmembrane transport);GO:0016020(membrane);GO:0016021(integral component of membrane);GO:0016324(apical plasma membrane);GO:…	04911(Insulin secretion);04917(Prolactin signaling pathway);04922(Glucagon signaling pathway);04930(Type II diabetes mellitus);04931(Insulin resistance);04950(Maturity onset diabetes of the young);04973(Carbohydrate digestion and absorption);05230(Central carbon metabolism in cancer);05230(Central carbon metabolism in cancer)	K07593	NA	solute carrier family 2 member 2 [Source:RGD Symbol;Acc:3705]	protein_coding	92.5671	130.307	100.581	58.398	49.2006	38.2947	2.21706	1.14865	2.6877e-06	0.000431623	up	yes
ENSRNOG00000005302	Slc2a9	ENSRNOT00000085275;ENSRNOT00000042200	GO:0005355(glucose transmembrane transporter activity);GO:0005635(nuclear envelope);GO:0005886(plasma membrane);GO:0005887(integral component of plasma membrane);GO:0015143(urate transmembrane transporter activity);GO:0015747(urate transport);GO:0015755(fructose transmembrane transport);GO:0016020(membrane);GO:0016021(integral component of membrane);GO:0016323(basolateral plasma membrane);GO:0016…	NA	K08146	NA	solute carrier family 2 member 9 [Source:RGD Symbol;Acc:1597012]	protein_coding	14.6804	16.2701	16.3248	7.7211	8.0504	7.78815	2.00662	1.00477	2.98028e-06	0.000472394	up	yes
ENSRNOG00000057701	Myom1	ENSRNOT00000085362	GO:0002074(extraocular skeletal muscle development);GO:0005515(protein binding);GO:0006936(muscle contraction);GO:0010628(positive regulation of gene expression);GO:0010737(protein kinase A signaling);GO:0019900(kinase binding);GO:0030017(sarcomere);GO:0031430(M band);GO:0042802(identical protein binding);GO:0042803(protein homodimerization activity);GO:0050714(positive regulation of protein secr…	NA	NA	NA	myomesin 1 [Source:RGD Symbol;Acc:631436]	protein_coding	0.940637	0.822589	0.958389	0.306494	0.225213	0.288308	3.31898	1.73074	3.30761e-06	0.000517556	up	yes
ENSRNOG00000006588	Meox2	ENSRNOT00000008803	GO:0000978(RNA polymerase II cis-regulatory region sequence-specific DNA binding);GO:0000981(DNA-binding transcription factor activity, RNA polymerase II-specific);GO:0001228(DNA-binding transcription activator activity, RNA polymerase II-specific);GO:0001525(angiogenesis);GO:0001757(somite specification);GO:0003677(DNA binding);GO:0003700(DNA-binding transcription factor activity);GO:0005634(nuc…	NA	NA	NA	mesenchyme homeobox 2 [Source:RGD Symbol;Acc:3079]	protein_coding	1.8717	2.92263	4.57527	1.02299	0.916066	0.577268	3.72353	1.89667	3.52492e-06	0.000544578	up	yes
ENSRNOG00000020281	Kif22	ENSRNOT00000027525	GO:0000166(nucleotide binding);GO:0000785(chromatin);GO:0003677(DNA binding);GO:0003777(microtubule motor activity);GO:0005524(ATP binding);GO:0005634(nucleus);GO:0005737(cytoplasm);GO:0005819(spindle);GO:0005829(cytosol);GO:0005856(cytoskeleton);GO:0005871(kinesin complex);GO:0005874(microtubule);GO:0006281(DNA repair);GO:0007018(microtubule-based movement);GO:0007062(sister chromatid cohesion);…	04914(Progesterone-mediated oocyte maturation)	K10403	NA	kinesin family member 22 [Source:RGD Symbol;Acc:1311886]	protein_coding	0.01801	0.121878	0.031507	0.36107	0.611743	0.670981	0.104268	-3.26163	3.95202e-06	0.00060293	down	yes
ENSRNOG00000029980	Zbtb16	ENSRNOT00000045356	GO:0000122(negative regulation of transcription by RNA polymerase II);GO:0000978(RNA polymerase II cis-regulatory region sequence-specific DNA binding);GO:0001227(DNA-binding transcription repressor activity, RNA polymerase II-specific);GO:0001501(skeletal system development);GO:0001823(mesonephros development);GO:0003676(nucleic acid binding);GO:0003677(DNA binding);GO:0003690(double-stranded DN…	05200(Pathways in cancer);05202(Transcriptional misregulation in cancer);05221(Acute myeloid leukemia)	K10055	NA	zinc finger and BTB domain containing 16 [Source:RGD Symbol;Acc:727921]	protein_coding	7.11579	3.37326	7.72399	0.850099	1.05672	2.85675	3.8234	1.93486	4.29394e-06	0.000647007	up	yes
ENSRNOG00000020194	Hes6	ENSRNOT00000086678;ENSRNOT00000066346	GO:0000122(negative regulation of transcription by RNA polymerase II);GO:0000977(RNA polymerase II regulatory region sequence-specific DNA binding);GO:0001227(DNA-binding transcription repressor activity, RNA polymerase II-specific);GO:0003677(DNA binding);GO:0003700(DNA-binding transcription factor activity);GO:0003712(transcription coregulator activity);GO:0005634(nucleus);GO:0005667(transcript…	05165(Human papillomavirus infection);05165(Human papillomavirus infection)	K09087	NA	hes family bHLH transcription factor 6 [Source:RGD Symbol;Acc:1312047]	protein_coding	32.174	50.2321	26.6023	18.394	12.5416	13.279	2.46544	1.30184	4.84653e-06	0.000721364	up	yes
ENSRNOG00000009076	Ttpal	ENSRNOT00000012606	GO:1902936(phosphatidylinositol bisphosphate binding)	NA	NA	NA	alpha tocopherol transfer protein like [Source:RGD Symbol;Acc:1305754]	protein_coding	2.64859	1.53051	1.96507	5.11094	3.83074	4.98788	0.441088	-1.18086	5.44702e-06	0.000800974	down	yes
ENSRNOG00000006622	Cry1	ENSRNOT00000009124	GO:0000122(negative regulation of transcription by RNA polymerase II);GO:0000166(nucleotide binding);GO:0003690(double-stranded DNA binding);GO:0005634(nucleus);GO:0005737(cytoplasm);GO:0005739(mitochondrion);GO:0006094(gluconeogenesis);GO:0006975(DNA damage induced protein phosphorylation);GO:0007623(circadian rhythm);GO:0008134(transcription factor binding);GO:0009416(response to light stimulus…	04710(Circadian rhythm)	K02295	NA	cryptochrome circadian regulator 1 [Source:RGD Symbol;Acc:735083]	protein_coding	0.897521	0.954914	0.808056	2.84988	2.64557	1.96053	0.356827	-1.48671	5.62912e-06	0.000817898	down	yes
ENSRNOG00000003538	Adamts4	ENSRNOT00000004713	GO:0002020(protease binding);GO:0004222(metalloendopeptidase activity);GO:0005576(extracellular region);GO:0005615(extracellular space);GO:0006508(proteolysis);GO:0008233(peptidase activity);GO:0008237(metallopeptidase activity);GO:0016607(nuclear speck);GO:0016787(hydrolase activity);GO:0046872(metal ion binding)	NA	K07764	EC:3.4.24.82	ADAM metallopeptidase with thrombospondin type 1 motif, 4 [Source:RGD Symbol;Acc:621242]	protein_coding	0.100471	0.080439	0.050595	0.268577	0.422633	0.459349	0.201211	-2.31322	6.32274e-06	0.000907871	down	yes
ENSRNOG00000010589	Zfp622	ENSRNOT00000089551;ENSRNOT00000063951;ENSRNOT00000066879;ENSRNOT00000089805	GO:0003676(nucleic acid binding);GO:0005634(nucleus);GO:0005737(cytoplasm);GO:0005783(endoplasmic reticulum);GO:0005789(endoplasmic reticulum membrane);GO:0005794(Golgi apparatus);GO:0005801(cis-Golgi network);GO:0006914(autophagy);GO:0008270(zinc ion binding);GO:0016020(membrane);GO:0016021(integral component of membrane);GO:0019233(sensory perception of pain);GO:0030176(integral component of en…	NA	K14816	NA	zinc finger protein 622 [Source:RGD Symbol;Acc:1309146]	protein_coding	6.81839	6.84291	9.90424	3.85025	4.05338	3.55485	2.0566	1.04026	7.02512e-06	0.000996995	up	yes
ENSRNOG00000018198	Dapk1	ENSRNOT00000066950;ENSRNOT00000080750	GO:0000166(nucleotide binding);GO:0004672(protein kinase activity);GO:0004674(protein serine/threonine kinase activity);GO:0004683(calmodulin-dependent protein kinase activity);GO:0005515(protein binding);GO:0005516(calmodulin binding);GO:0005524(ATP binding);GO:0005525(GTP binding);GO:0005634(nucleus);GO:0005737(cytoplasm);GO:0005886(plasma membrane);GO:0006468(protein phosphorylation);GO:000691…	04140(Autophagy - animal);05200(Pathways in cancer);05219(Bladder cancer);05219(Bladder cancer)	K08803	EC:2.7.11.1	death associated protein kinase 1 [Source:RGD Symbol;Acc:1311629]	protein_coding	2.79075	1.52605	2.94671	4.55695	6.03346	5.92861	0.439706	-1.18539	7.38274e-06	0.0010357	down	yes
ENSRNOG00000051258	Taf9	ENSRNOT00000076061;ENSRNOT00000076484;ENSRNOT00000076434;ENSRNOT00000076294;ENSRNOT00000076372	GO:0000124(SAGA complex);GO:0000125(PCAF complex);GO:0000492(box C/D snoRNP assembly);GO:0000976(transcription regulatory region sequence-specific DNA binding);GO:0002039(p53 binding);GO:0003677(DNA binding);GO:0003713(transcription coactivator activity);GO:0004402(histone acetyltransferase activity);GO:0005515(protein binding);GO:0005575(cellular_component);GO:0005634(nucleus);GO:0005669(transcr…	03022(Basal transcription factors);03022(Basal transcription factors)	K14535	NA	TATA-box binding protein associated factor 9 [Source:RGD Symbol;Acc:727861]	protein_coding	4.8342	3.50323	16.5711	1.95273	2.18476	1.40464	4.49439	2.16813	7.99697e-06	0.00110913	up	yes
ENSRNOG00000019098	Ca5a	ENSRNOT00000025848	GO:0004089(carbonate dehydratase activity);GO:0005737(cytoplasm);GO:0005739(mitochondrion);GO:0006730(one-carbon metabolic process);GO:0008270(zinc ion binding);GO:0016829(lyase activity);GO:0016836(hydro-lyase activity);GO:0046872(metal ion binding)	00910(Nitrogen metabolism)	K01672	EC:4.2.1.1	carbonic anhydrase 5A [Source:RGD Symbol;Acc:2243]	protein_coding	42.9213	36.0975	59.4213	20.6785	24.6069	16.9143	2.22574	1.15428	8.80336e-06	0.00120725	up	yes
ENSRNOG00000059753	Gys2	ENSRNOT00000090122	GO:0004373(glycogen (starch) synthase activity);GO:0005978(glycogen biosynthetic process);GO:0016740(transferase activity);GO:0016757(transferase activity, transferring glycosyl groups)	00500(Starch and sucrose metabolism);04151(PI3K-Akt signaling pathway);04152(AMPK signaling pathway);04910(Insulin signaling pathway);04922(Glucagon signaling pathway);04931(Insulin resistance)	K00693	EC:2.4.1.11	glycogen synthase 2 [Source:RGD Symbol;Acc:2773]	protein_coding	40.7476	60.8232	98.7645	25.9343	28.1658	31.6175	2.33716	1.22476	9.1809e-06	0.00124503	up	yes
ENSRNOG00000014066	Jade1	ENSRNOT00000018872	GO:0000123(histone acetyltransferase complex);GO:0003713(transcription coactivator activity);GO:0005634(nucleus);GO:0005737(cytoplasm);GO:0005829(cytosol);GO:0005886(plasma membrane);GO:0016607(nuclear speck);GO:0036064(ciliary basal body);GO:0043966(histone H3 acetylation);GO:0043981(histone H4-K5 acetylation);GO:0043982(histone H4-K8 acetylation);GO:0043983(histone H4-K12 acetylation);GO:004687…	NA	K11347	NA	jade family PHD finger 1 [Source:RGD Symbol;Acc:1306920]	protein_coding	5.01086	5.53418	5.10151	2.9384	2.55147	2.19153	2.03694	1.0264	1.04875e-05	0.00139131	up	yes
ENSRNOG00000045743	Etnppl	ENSRNOT00000074209	GO:0003824(catalytic activity);GO:0005739(mitochondrion);GO:0008483(transaminase activity);GO:0030170(pyridoxal phosphate binding);GO:0050459(ethanolamine-phosphate phospho-lyase activity)	00564(Glycerophospholipid metabolism)	K14286	EC:4.2.3.2	ethanolamine-phosphate phospho-lyase [Source:RGD Symbol;Acc:1590098]	protein_coding	50.0981	28.5442	77.2654	20.7055	23.0527	19.2663	2.47376	1.30671	1.2104e-05	0.00155504	up	yes
ENSRNOG00000007478	Cry2	ENSRNOT00000010142	GO:0000976(transcription regulatory region sequence-specific DNA binding);GO:0005634(nucleus);GO:0005739(mitochondrion);GO:0005829(cytosol);GO:0006606(protein import into nucleus);GO:0007623(circadian rhythm);GO:0009416(response to light stimulus);GO:0009881(photoreceptor activity);GO:0014823(response to activity);GO:0016607(nuclear speck);GO:0016829(lyase activity);GO:0018298(protein-chromophore…	04710(Circadian rhythm)	K02295	NA	cryptochrome circadian regulator 2 [Source:RGD Symbol;Acc:620935]	protein_coding	9.65487	12.7692	11.3741	6.70777	4.73509	4.16907	2.16489	1.11429	1.41149e-05	0.00179451	up	yes
ENSRNOG00000007483	Ccnf	ENSRNOT00000064392	GO:0000079(regulation of cyclin-dependent protein serine/threonine kinase activity);GO:0000307(cyclin-dependent protein kinase holoenzyme complex);GO:0000320(re-entry into mitotic cell cycle);GO:0001890(placenta development);GO:0005515(protein binding);GO:0005634(nucleus);GO:0005737(cytoplasm);GO:0005813(centrosome);GO:0005814(centriole);GO:0005856(cytoskeleton);GO:0007049(cell cycle);GO:0010826(…	NA	K10289	NA	cyclin F [Source:RGD Symbol;Acc:67401]	protein_coding	1.5455	0.58393	1.3982	3.19847	2.4311	6.19945	0.298218	-1.74556	1.68082e-05	0.00211488	down	yes
ENSRNOG00000028668	Slc28a2	ENSRNOT00000036435;ENSRNOT00000024658	GO:0005326(neurotransmitter transmembrane transporter activity);GO:0005337(nucleoside transmembrane transporter activity);GO:0005345(purine nucleobase transmembrane transporter activity);GO:0005415(nucleoside:sodium symporter activity);GO:0005887(integral component of plasma membrane);GO:0006836(neurotransmitter transport);GO:0015211(purine nucleoside transmembrane transporter activity);GO:001521…	NA	K11536	NA	solute carrier family 28 member 2 [Source:RGD Symbol;Acc:61840]	protein_coding	21.2278	16.1234	14.4053	41.5888	38.1986	27.8748	0.480731	-1.0567	1.71048e-05	0.00213024	down	yes
ENSRNOG00000004067	Nrcam	ENSRNOT00000083088;ENSRNOT00000085979;ENSRNOT00000093195;ENSRNOT00000091677;ENSRNOT00000051908;ENSRNOT00000050222;ENSRNOT00000093255;ENSRNOT00000093147;ENSRNOT00000059739;ENSRNOT00000078583;ENSRNOT00000082793;ENSRNOT00000093290;ENSRNOT00000093300;ENSRNOT00000093241	GO:0001525(angiogenesis);GO:0005515(protein binding);GO:0005886(plasma membrane);GO:0007155(cell adhesion);GO:0007411(axon guidance);GO:0007417(central nervous system development);GO:0008104(protein localization);GO:0010975(regulation of neuron projection development);GO:0016020(membrane);GO:0016021(integral component of membrane);GO:0019227(neuronal action potential propagation);GO:0030424(axon)…	04514(Cell adhesion molecules (CAMs));04514(Cell adhesion molecules (CAMs))	K06756	NA	neuronal cell adhesion molecule [Source:RGD Symbol;Acc:3209]	protein_coding;processed_transcript;retained_intron	0.63282	0.391305	0.466317	0.114123	0.122896	0.197352	3.43126	1.77874	1.78467e-05	0.00215746	up	yes
ENSRNOG00000058589	AABR07046778	ENSRNOT00000084749	GO:0008137(NADH dehydrogenase (ubiquinone) activity);GO:0016020(membrane);GO:0016021(integral component of membrane);GO:0016651(oxidoreductase activity, acting on NAD(P)H);GO:0030964(NADH dehydrogenase complex);GO:0031966(mitochondrial membrane);GO:0042773(ATP synthesis coupled electron transport);GO:0055114(oxidation-reduction process)	NA	NA	NA		protein_coding	270.436	519.745	463.966	65.8477	96.9789	242.767	3.09212	1.6286	1.78537e-05	0.00215746	up	yes
ENSRNOG00000009712	Gale	ENSRNOT00000013322;ENSRNOT00000084085	GO:0003974(UDP-N-acetylglucosamine 4-epimerase activity);GO:0003978(UDP-glucose 4-epimerase activity);GO:0005975(carbohydrate metabolic process);GO:0006012(galactose metabolic process);GO:0016853(isomerase activity);GO:0019388(galactose catabolic process);GO:0042802(identical protein binding);GO:0042803(protein homodimerization activity);GO:0042803(protein homodimerization activity)	00052(Galactose metabolism);00520(Amino sugar and nucleotide sugar metabolism);00520(Amino sugar and nucleotide sugar metabolism)	K01784	EC:5.1.3.2	UDP-galactose-4-epimerase [Source:RGD Symbol;Acc:621493]	protein_coding	2.44259	2.43883	2.16639	5.96676	5.42161	5.53268	0.416512	-1.26357	1.85404e-05	0.00221849	down	yes
ENSRNOG00000002052	Ccdc80	ENSRNOT00000059735;ENSRNOT00000093233	GO:0001968(fibronectin binding);GO:0005539(glycosaminoglycan binding);GO:0005576(extracellular region);GO:0005604(basement membrane);GO:0005614(interstitial matrix);GO:0008201(heparin binding);GO:0009617(response to bacterium);GO:0010811(positive regulation of cell-substrate adhesion);GO:0030198(extracellular matrix organization);GO:0031012(extracellular matrix);GO:0031012(extracellular matrix)	NA	NA	NA	coiled-coil domain containing 80 [Source:RGD Symbol;Acc:69421]	protein_coding;retained_intron	5.69784	6.00645	7.60317	10.0627	11.872	17.6606	0.48762	-1.03617	2.11451e-05	0.0025056	down	yes
ENSRNOG00000018815	Plk1	ENSRNOT00000025629	GO:0000070(mitotic sister chromatid segregation);GO:0000086(G2/M transition of mitotic cell cycle);GO:0000122(negative regulation of transcription by RNA polymerase II);GO:0000132(establishment of mitotic spindle orientation);GO:0000166(nucleotide binding);GO:0000278(mitotic cell cycle);GO:0000281(mitotic cytokinesis);GO:0000287(magnesium ion binding);GO:0000775(chromosome, centromeric region);GO…	04068(FoxO signaling pathway);04110(Cell cycle);04114(Oocyte meiosis);04914(Progesterone-mediated oocyte maturation)	K06631	EC:2.7.11.21	polo-like kinase 1 [Source:RGD Symbol;Acc:3352]	protein_coding	0.107225	0.073871	0.049135	0.519267	0.325188	0.471076	0.17501	-2.51449	2.30074e-05	0.00270005	down	yes
ENSRNOG00000053448	AC123346	ENSRNOT00000077603	GO:0005507(copper ion binding);GO:0005769(early endosome);GO:0005783(endoplasmic reticulum);GO:0005794(Golgi apparatus);GO:0005886(plasma membrane);GO:0008131(primary amine oxidase activity);GO:0008537(proteasome activator complex);GO:0009308(amine metabolic process);GO:0016491(oxidoreductase activity);GO:0046677(response to antibiotic);GO:0046872(metal ion binding);GO:0048038(quinone binding);GO…	NA	NA	NA		nonsense_mediated_decay	0.61455	1.76423	4.02439	9.09372	19.1628	4.60987	0.194824	-2.35976	2.51352e-05	0.00285842	down	yes
ENSRNOG00000005413	Creb3l1	ENSRNOT00000007771	GO:0000122(negative regulation of transcription by RNA polymerase II);GO:0000790(nuclear chromatin);GO:0000976(transcription regulatory region sequence-specific DNA binding);GO:0001227(DNA-binding transcription repressor activity, RNA polymerase II-specific);GO:0001228(DNA-binding transcription activator activity, RNA polymerase II-specific);GO:0001649(osteoblast differentiation);GO:0003674(molec…	04022(cGMP-PKG signaling pathway);04024(cAMP signaling pathway);04151(PI3K-Akt signaling pathway);04152(AMPK signaling pathway);04211(Longevity regulating pathway);04261(Adrenergic signaling in cardiomyocytes);04668(TNF signaling pathway);04714(Thermogenesis);04725(Cholinergic synapse);04728(Dopaminergic synapse);04911(Insulin secretion);04915(Estrogen signaling pathway);04916(Melanogenesis);0491…	K09048	NA	cAMP responsive element binding protein 3-like 1 [Source:RGD Symbol;Acc:1359613]	protein_coding	1.25015	0.90411	0.96005	2.83498	2.18061	3.06228	0.385537	-1.37506	2.52937e-05	0.00285842	down	yes
ENSRNOG00000033915	Gpt	ENSRNOT00000050556	GO:0003824(catalytic activity);GO:0004021(L-alanine:2-oxoglutarate aminotransferase activity);GO:0005615(extracellular space);GO:0005737(cytoplasm);GO:0008483(transaminase activity);GO:0009058(biosynthetic process);GO:0016740(transferase activity);GO:0030170(pyridoxal phosphate binding);GO:0032869(cellular response to insulin stimulus);GO:0042594(response to starvation);GO:0042853(L-alanine catab…	00220(Arginine biosynthesis);00250(Alanine, aspartate and glutamate metabolism)	K00814	EC:2.6.1.2	glutamic--pyruvic transaminase [Source:RGD Symbol;Acc:621720]	protein_coding	117.169	148.433	214.886	87.3994	73.4746	75.5062	2.03269	1.02339	2.61228e-05	0.00292503	up	yes
ENSRNOG00000029543	Cish	ENSRNOT00000040056	GO:0005886(plasma membrane);GO:0007205(protein kinase C-activating G protein-coupled receptor signaling pathway);GO:0009968(negative regulation of signal transduction);GO:0016567(protein ubiquitination);GO:0035556(intracellular signal transduction);GO:0040008(regulation of growth)	04630(Jak-STAT signaling pathway);04917(Prolactin signaling pathway)	K04701	NA	cytokine inducible SH2-containing protein [Source:RGD Symbol;Acc:69261]	protein_coding	15.1862	0.733475	25.1913	0.796511	0.786645	2.48428	10.1073	3.33733	2.82599e-05	0.00310731	up	yes
ENSRNOG00000011820	Acpp	ENSRNOT00000085585;ENSRNOT00000016222	GO:0003993(acid phosphatase activity);GO:0005615(extracellular space);GO:0005886(plasma membrane);GO:0006144(purine nucleobase metabolic process);GO:0006772(thiamine metabolic process);GO:0008253(5'-nucleotidase activity);GO:0009117(nucleotide metabolic process);GO:0012506(vesicle membrane);GO:0016020(membrane);GO:0016021(integral component of membrane);GO:0016311(dephosphorylation);GO:0016791(ph…	NA	K19283	3.1.3.5;EC:3.1.3.2	acid phosphatase, prostate [Source:RGD Symbol;Acc:2023]	protein_coding	1.72735	1.73704	1.44036	3.52646	5.01131	2.48806	0.444842	-1.16864	2.98892e-05	0.00325712	down	yes
ENSRNOG00000020990	Fgf21	ENSRNOT00000028490	GO:0003674(molecular_function);GO:0005104(fibroblast growth factor receptor binding);GO:0005576(extracellular region);GO:0005615(extracellular space);GO:0008083(growth factor activity);GO:0008284(positive regulation of cell population proliferation);GO:0008543(fibroblast growth factor receptor signaling pathway);GO:0010898(positive regulation of triglyceride catabolic process);GO:0014823(response…	04010(MAPK signaling pathway);04014(Ras signaling pathway);04015(Rap1 signaling pathway);04151(PI3K-Akt signaling pathway);04714(Thermogenesis);04810(Regulation of actin cytoskeleton);05200(Pathways in cancer);05218(Melanoma);05224(Breast cancer);05226(Gastric cancer)	K22429	NA	fibroblast growth factor 21 [Source:RGD Symbol;Acc:620175]	protein_coding	5.24303	7.12758	10.4761	15.0734	16.8745	23.6966	0.410583	-1.28425	3.01599e-05	0.00325754	down	yes
ENSRNOG00000006118	Klf10	ENSRNOT00000008350;ENSRNOT00000085626	GO:0000976(transcription regulatory region sequence-specific DNA binding);GO:0000978(RNA polymerase II cis-regulatory region sequence-specific DNA binding);GO:0000981(DNA-binding transcription factor activity, RNA polymerase II-specific);GO:0001046(core promoter sequence-specific DNA binding);GO:0001228(DNA-binding transcription activator activity, RNA polymerase II-specific);GO:0003676(nucleic a…	NA	K09209	NA	Kruppel-like factor 10 [Source:RGD Symbol;Acc:621652]	protein_coding	6.47111	7.45063	10.0968	4.16973	3.08719	4.59287	2.02692	1.01929	3.22819e-05	0.00342609	up	yes
ENSRNOG00000006779	Crot	ENSRNOT00000067462;ENSRNOT00000091799;ENSRNOT00000090968	GO:0005759(mitochondrial matrix);GO:0005777(peroxisome);GO:0006091(generation of precursor metabolites and energy);GO:0006631(fatty acid metabolic process);GO:0006635(fatty acid beta-oxidation);GO:0008458(carnitine O-octanoyltransferase activity);GO:0009437(carnitine metabolic process);GO:0015908(fatty acid transport);GO:0015936(coenzyme A metabolic process);GO:0016740(transferase activity);GO:00…	04146(Peroxisome);04146(Peroxisome)	K05940	EC:2.3.1.137	carnitine O-octanoyltransferase [Source:RGD Symbol;Acc:70908]	protein_coding	82.3624	51.6345	54.238	161.261	101.95	131.93	0.476373	-1.06984	3.35279e-05	0.00351401	down	yes
ENSRNOG00000019741	Isyna1	ENSRNOT00000026821	GO:0004512(inositol-3-phosphate synthase activity);GO:0005737(cytoplasm);GO:0006021(inositol biosynthetic process);GO:0006629(lipid metabolic process);GO:0008654(phospholipid biosynthetic process);GO:0016853(isomerase activity)	00562(Inositol phosphate metabolism)	K01858	EC:5.5.1.4	inositol-3-phosphate synthase 1 [Source:RGD Symbol;Acc:1359423]	protein_coding	4.1775	4.43269	3.61105	8.21511	6.55751	9.80867	0.497177	-1.00817	3.70789e-05	0.00383515	down	yes
ENSRNOG00000019587	Ptprn	ENSRNOT00000026654	GO:0000302(response to reactive oxygen species);GO:0001553(luteinization);GO:0004725(protein tyrosine phosphatase activity);GO:0005634(nucleus);GO:0005768(endosome);GO:0005794(Golgi apparatus);GO:0005886(plasma membrane);GO:0006470(protein dephosphorylation);GO:0008134(transcription factor binding);GO:0009749(response to glucose);GO:0016020(membrane);GO:0016021(integral component of membrane);GO:…	04940(Type I diabetes mellitus)	K07817	EC:3.1.3.48	protein tyrosine phosphatase, receptor type, N [Source:RGD Symbol;Acc:620777]	protein_coding	2.14745	1.90054	3.31231	0.739123	1.12898	0.360588	3.30252	1.72357	3.7978e-05	0.00389513	up	yes
ENSRNOG00000033433	Csrnp1	ENSRNOT00000083004;ENSRNOT00000050543	GO:0001228(DNA-binding transcription activator activity, RNA polymerase II-specific);GO:0003700(DNA-binding transcription factor activity);GO:0005634(nucleus);GO:0006355(regulation of transcription, DNA-templated);GO:0009791(post-embryonic development);GO:0043565(sequence-specific DNA binding);GO:0045944(positive regulation of transcription by RNA polymerase II);GO:0048008(platelet-derived growth…	NA	K17494	NA	cysteine and serine rich nuclear protein 1 [Source:RGD Symbol;Acc:1305999]	protein_coding	3.9255	6.69583	4.16589	2.59187	1.55302	2.12373	2.35893	1.23813	4.15386e-05	0.00422482	up	yes
ENSRNOG00000057556	Pdzrn3	ENSRNOT00000090506	GO:0004842(ubiquitin-protein transferase activity);GO:0005515(protein binding);GO:0007528(neuromuscular junction development);GO:0008270(zinc ion binding);GO:0016567(protein ubiquitination);GO:0031594(neuromuscular junction);GO:0046872(metal ion binding);GO:0061630(ubiquitin protein ligase activity)	NA	K15682	EC:2.3.2.27	PDZ domain containing RING finger 3 [Source:RGD Symbol;Acc:1305250]	protein_coding	2.9365	3.90538	3.36801	1.3902	1.87727	1.7694	2.02703	1.01937	4.24225e-05	0.00427907	up	yes
ENSRNOG00000011490	Angptl8	ENSRNOT00000015381	GO:0005576(extracellular region);GO:0010954(positive regulation of protein processing);GO:0019216(regulation of lipid metabolic process);GO:0044255(cellular lipid metabolic process);GO:0045444(fat cell differentiation);GO:0048469(cell maturation);GO:0050746(regulation of lipoprotein metabolic process);GO:0070328(triglyceride homeostasis)	04979(Cholesterol metabolism)	K22289	NA	angiopoietin-like 8 [Source:RGD Symbol;Acc:2320121]	protein_coding	9.53101	16.9615	10.1434	44.4139	23.9276	22.805	0.401945	-1.31493	4.54509e-05	0.00450998	down	yes
ENSRNOG00000020701	Brca1	ENSRNOT00000083111;ENSRNOT00000028109	GO:0000724(double-strand break repair via homologous recombination);GO:0000793(condensed chromosome);GO:0000794(condensed nuclear chromosome);GO:0000800(lateral element);GO:0000976(transcription regulatory region sequence-specific DNA binding);GO:0003677(DNA binding);GO:0003684(damaged DNA binding);GO:0003713(transcription coactivator activity);GO:0003723(RNA binding);GO:0004842(ubiquitin-protein…	01524(Platinum drug resistance);03440(Homologous recombination);03460(Fanconi anemia pathway);04120(Ubiquitin mediated proteolysis);04151(PI3K-Akt signaling pathway);05206(MicroRNAs in cancer);05224(Breast cancer);05224(Breast cancer)	K10605	EC:2.3.2.27	BRCA1, DNA repair associated [Source:RGD Symbol;Acc:2218]	protein_coding	0.858764	0.797975	1.16971	0.403431	0.376851	0.258318	2.7214	1.44435	4.81153e-05	0.00473586	up	yes
ENSRNOG00000008079	Ugp2	ENSRNOT00000067668;ENSRNOT00000081245	GO:0003983(UTP:glucose-1-phosphate uridylyltransferase activity);GO:0005536(glucose binding);GO:0005737(cytoplasm);GO:0005977(glycogen metabolic process);GO:0005978(glycogen biosynthetic process);GO:0006011(UDP-glucose metabolic process);GO:0007420(brain development);GO:0016740(transferase activity);GO:0016779(nucleotidyltransferase activity);GO:0019255(glucose 1-phosphate metabolic process);GO:0…	00040(Pentose and glucuronate interconversions);00052(Galactose metabolism);00500(Starch and sucrose metabolism);00520(Amino sugar and nucleotide sugar metabolism);00520(Amino sugar and nucleotide sugar metabolism)	K00963	EC:2.7.7.9	UDP-glucose pyrophosphorylase 2 [Source:RGD Symbol;Acc:1310210]	protein_coding	138.315	249.405	168.583	66.0868	53.9182	122.1	2.29778	1.20024	5.44791e-05	0.00527713	up	yes
ENSRNOG00000057522	LOC103689968	ENSRNOT00000079455	GO:0016020(membrane);GO:0016021(integral component of membrane);GO:0030176(integral component of endoplasmic reticulum membrane);GO:0061709(reticulophagy)	NA	NA	NA	protein FAM134B [Source:RGD Symbol;Acc:9390936]	protein_coding	14.6697	10.9194	17.6511	8.13435	6.21395	6.28842	2.09531	1.06716	5.73452e-05	0.005511	up	yes
ENSRNOG00000013419	Hykk	ENSRNOT00000018003	GO:0016310(phosphorylation);GO:0019202(amino acid kinase activity);GO:0047992(hydroxylysine kinase activity)	00310(Lysine degradation)	K18201	EC:2.7.1.81	hydroxylysine kinase [Source:RGD Symbol;Acc:1308677]	protein_coding	8.98142	6.08777	5.25818	3.65007	3.1595	2.87375	2.09921	1.06985	6.42935e-05	0.00613049	up	yes
ENSRNOG00000018804	Ripor2	ENSRNOT00000048298	GO:0005737(cytoplasm);GO:0005856(cytoskeleton);GO:0005886(plasma membrane);GO:0006879(cellular iron ion homeostasis);GO:0006935(chemotaxis);GO:0007155(cell adhesion);GO:0007162(negative regulation of cell adhesion);GO:0007517(muscle organ development);GO:0007605(sensory perception of sound);GO:0008199(ferric iron binding);GO:0009968(negative regulation of signal transduction);GO:0016020(membrane)…	NA	NA	NA	RHO family interacting cell polarization regulator 2 [Source:RGD Symbol;Acc:1306939]	protein_coding	0.240239	0.42785	1.28353	0.746643	6.87106	4.38284	0.162628	-2.62035	7.71801e-05	0.00713624	down	yes
ENSRNOG00000005984	Etv6	ENSRNOT00000007889	GO:0000122(negative regulation of transcription by RNA polymerase II);GO:0000977(RNA polymerase II regulatory region sequence-specific DNA binding);GO:0000978(RNA polymerase II cis-regulatory region sequence-specific DNA binding);GO:0000981(DNA-binding transcription factor activity, RNA polymerase II-specific);GO:0001227(DNA-binding transcription repressor activity, RNA polymerase II-specific);GO…	05202(Transcriptional misregulation in cancer)	K03211	NA	ETS variant transcription factor 6 [Source:RGD Symbol;Acc:1559537]	protein_coding	1.46976	0.620639	1.52902	3.33566	3.42588	3.37713	0.356992	-1.48604	8.96927e-05	0.00810888	down	yes
ENSRNOG00000031162	Ccl24	ENSRNOT00000045157;ENSRNOT00000077378	GO:0001938(positive regulation of endothelial cell proliferation);GO:0002548(monocyte chemotaxis);GO:0003674(molecular_function);GO:0005125(cytokine activity);GO:0005575(cellular_component);GO:0005576(extracellular region);GO:0005615(extracellular space);GO:0006935(chemotaxis);GO:0006954(inflammatory response);GO:0006955(immune response);GO:0007010(cytoskeleton organization);GO:0007186(G protein-…	04060(Cytokine-cytokine receptor interaction);04062(Chemokine signaling pathway);04062(Chemokine signaling pathway)	K21097	NA	C-C motif chemokine ligand 24 [Source:RGD Symbol;Acc:1310245]	protein_coding	0.919675	1.33264	1.50556	2.38079	3.16263	5.53663	0.339157	-1.55998	9.48586e-05	0.00845072	down	yes
ENSRNOG00000005479	Slc1a2	ENSRNOT00000007604	GO:0015293(symporter activity);GO:0016020(membrane);GO:0016021(integral component of membrane);GO:0055085(transmembrane transport)	NA	NA	NA	solute carrier family 1 member 2 [Source:RGD Symbol;Acc:3697]	protein_coding	5.89205	5.79212	10.6796	2.79301	3.23261	1.77184	2.86808	1.52009	9.58503e-05	0.00847719	up	yes
ENSRNOG00000016356	Got1	ENSRNOT00000022309	GO:0003824(catalytic activity);GO:0004069(L-aspartate:2-oxoglutarate aminotransferase activity);GO:0004609(phosphatidylserine decarboxylase activity);GO:0005654(nucleoplasm);GO:0005737(cytoplasm);GO:0005764(lysosome);GO:0005829(cytosol);GO:0006103(2-oxoglutarate metabolic process);GO:0006107(oxaloacetate metabolic process);GO:0006114(glycerol biosynthetic process);GO:0006520(cellular amino acid m…	00220(Arginine biosynthesis);00250(Alanine, aspartate and glutamate metabolism);00270(Cysteine and methionine metabolism);00330(Arginine and proline metabolism);00350(Tyrosine metabolism);00360(Phenylalanine metabolism);00400(Phenylalanine, tyrosine and tryptophan biosynthesis)	K14454	EC:2.6.1.1	glutamic-oxaloacetic transaminase 1 [Source:RGD Symbol;Acc:2721]	protein_coding	105.365	103.679	214.168	64.747	53.3038	80.6735	2.12964	1.09061	9.73079e-05	0.00849255	up	yes
ENSRNOG00000060603	Nhsl1	ENSRNOT00000079250	GO:0030154(cell differentiation)	NA	NA	NA	NHS-like 1 [Source:RGD Symbol;Acc:1308124]	protein_coding	1.87331	1.85387	1.66517	0.880012	0.898332	0.826216	2.07035	1.04988	9.81114e-05	0.00849255	up	yes
ENSRNOG00000023972	Col4a2	ENSRNOT00000057461	GO:0003674(molecular_function);GO:0005201(extracellular matrix structural constituent);GO:0005575(cellular_component);GO:0005576(extracellular region);GO:0005581(collagen trimer);GO:0005587(collagen type IV trimer);GO:0005604(basement membrane);GO:0005615(extracellular space);GO:0006351(transcription, DNA-templated);GO:0007568(aging);GO:0014823(response to activity);GO:0016020(membrane);GO:001652…	04151(PI3K-Akt signaling pathway);04510(Focal adhesion);04512(ECM-receptor interaction);04926(Relaxin signaling pathway);04933(AGE-RAGE signaling pathway in diabetic complications);04974(Protein digestion and absorption);05146(Amoebiasis);05165(Human papillomavirus infection);05200(Pathways in cancer);05222(Small cell lung cancer)	K06237	NA	collagen type IV alpha 2 chain [Source:RGD Symbol;Acc:1308085]	protein_coding	1.93026	2.00792	1.40223	3.01225	3.01437	5.45434	0.465154	-1.10422	0.000112771	0.00953024	down	yes
ENSRNOG00000006859	Insig1	ENSRNOT00000009233	GO:0003674(molecular_function);GO:0005575(cellular_component);GO:0005783(endoplasmic reticulum);GO:0005789(endoplasmic reticulum membrane);GO:0006629(lipid metabolic process);GO:0006641(triglyceride metabolic process);GO:0006695(cholesterol biosynthetic process);GO:0006991(response to sterol depletion);GO:0008142(oxysterol binding);GO:0008202(steroid metabolic process);GO:0008203(cholesterol meta…	NA	NA	NA	insulin induced gene 1 [Source:RGD Symbol;Acc:708457]	protein_coding	32.3652	28.5386	18.6158	53.8293	42.148	63.8834	0.49743	-1.00743	0.000113223	0.00953024	down	yes
ENSRNOG00000004709	Foxn3	ENSRNOT00000006604;ENSRNOT00000083665	GO:0003677(DNA binding);GO:0003700(DNA-binding transcription factor activity);GO:0005634(nucleus);GO:0006355(regulation of transcription, DNA-templated);GO:0007095(mitotic G2 DNA damage checkpoint);GO:0008022(protein C-terminus binding);GO:0043565(sequence-specific DNA binding);GO:0045892(negative regulation of transcription, DNA-templated);GO:0097094(craniofacial suture morphogenesis);GO:0097094…	NA	K09407	NA	forkhead box N3 [Source:RGD Symbol;Acc:1305711]	protein_coding	1.43207	2.43059	1.66343	3.80072	3.44007	3.973	0.492794	-1.02094	0.000117923	0.00979085	down	yes
ENSRNOG00000019500	Cyp1a1	ENSRNOT00000026473	GO:0001666(response to hypoxia);GO:0001889(liver development);GO:0002933(lipid hydroxylation);GO:0003824(catalytic activity);GO:0004497(monooxygenase activity);GO:0005506(iron ion binding);GO:0005515(protein binding);GO:0005737(cytoplasm);GO:0005739(mitochondrion);GO:0005743(mitochondrial inner membrane);GO:0005783(endoplasmic reticulum);GO:0005789(endoplasmic reticulum membrane);GO:0006629(lipid…	00140(Steroid hormone biosynthesis);00380(Tryptophan metabolism);00830(Retinol metabolism);00980(Metabolism of xenobiotics by cytochrome P450);04913(Ovarian steroidogenesis);05204(Chemical carcinogenesis)	K07408	EC:1.14.14.1	cytochrome P450, family 1, subfamily a, polypeptide 1 [Source:RGD Symbol;Acc:2458]	protein_coding	1.14061	2.33107	2.44807	0.395752	0.0001	0.144804	10.9492	3.45275	0.000119356	0.00984281	up	yes
ENSRNOG00000016551	Bcl2l11	ENSRNOT00000051069;ENSRNOT00000022596	GO:0001701(in utero embryonic development);GO:0001776(leukocyte homeostasis);GO:0001782(B cell homeostasis);GO:0001783(B cell apoptotic process);GO:0001822(kidney development);GO:0002260(lymphocyte homeostasis);GO:0002262(myeloid cell homeostasis);GO:0005515(protein binding);GO:0005737(cytoplasm);GO:0005739(mitochondrion);GO:0005829(cytosol);GO:0005874(microtubule);GO:0006915(apoptotic process);G…	01521(EGFR tyrosine kinase inhibitor resistance);04068(FoxO signaling pathway);04151(PI3K-Akt signaling pathway);04210(Apoptosis);04215(Apoptosis - multiple species);04932(Non-alcoholic fatty liver disease (NAFLD));05169(Epstein-Barr virus infection);05200(Pathways in cancer);05206(MicroRNAs in cancer);05210(Colorectal cancer);05210(Colorectal cancer)	K16341	NA	BCL2 like 11 [Source:RGD Symbol;Acc:628774]	protein_coding	1.81226	3.37134	1.67533	0.706821	1.22751	0.813237	2.49637	1.31983	0.00012889	0.0104115	up	yes
ENSRNOG00000002946	Socs3	ENSRNOT00000003940	GO:0001784(phosphotyrosine residue binding);GO:0001932(regulation of protein phosphorylation);GO:0007259(receptor signaling pathway via JAK-STAT);GO:0009968(negative regulation of signal transduction);GO:0016567(protein ubiquitination);GO:0035556(intracellular signal transduction);GO:0040008(regulation of growth);GO:0042532(negative regulation of tyrosine phosphorylation of STAT protein);GO:00430…	04120(Ubiquitin mediated proteolysis);04380(Osteoclast differentiation);04630(Jak-STAT signaling pathway);04668(TNF signaling pathway);04910(Insulin signaling pathway);04917(Prolactin signaling pathway);04920(Adipocytokine signaling pathway);04930(Type II diabetes mellitus);04931(Insulin resistance);04932(Non-alcoholic fatty liver disease (NAFLD));05160(Hepatitis C);05164(Influenza A);05168(Herpe…	K04696	NA	suppressor of cytokine signaling 3 [Source:RGD Symbol;Acc:621087]	protein_coding	6.12191	4.66501	12.9027	2.8403	1.30173	3.03225	3.30203	1.72335	0.000129664	0.0104115	up	yes
ENSRNOG00000003841	Kcnh1	ENSRNOT00000076362;ENSRNOT00000005209;ENSRNOT00000077014	GO:0001964(startle response);GO:0005216(ion channel activity);GO:0005244(voltage-gated ion channel activity);GO:0005249(voltage-gated potassium channel activity);GO:0005251(delayed rectifier potassium channel activity);GO:0005267(potassium channel activity);GO:0005515(protein binding);GO:0005516(calmodulin binding);GO:0005634(nucleus);GO:0005637(nuclear inner membrane);GO:0005768(endosome);GO:000…	NA	K04904	NA	potassium voltage-gated channel subfamily H member 1 [Source:RGD Symbol;Acc:68398]	protein_coding;nonsense_mediated_decay	0.356305	0.563954	0.578645	0.122369	0.0542959	0.0001	8.47967	3.08401	0.000137793	0.0108501	up	yes
ENSRNOG00000010188	Satb2	ENSRNOT00000087684;ENSRNOT00000049259	GO:0000118(histone deacetylase complex);GO:0000122(negative regulation of transcription by RNA polymerase II);GO:0000977(RNA polymerase II regulatory region sequence-specific DNA binding);GO:0000978(RNA polymerase II cis-regulatory region sequence-specific DNA binding);GO:0001228(DNA-binding transcription activator activity, RNA polymerase II-specific);GO:0001764(neuron migration);GO:0002076(oste…	NA	K23226	NA	SATB homeobox 2 [Source:RGD Symbol;Acc:1562369]	protein_coding	1.03858	0.469998	1.02751	0.273694	0.33129	0.279972	2.86577	1.51892	0.000143223	0.011134	up	yes
ENSRNOG00000023257	Adamts9	ENSRNOT00000057045	GO:0003179(heart valve morphogenesis);GO:0003229(ventricular cardiac muscle tissue development);GO:0004175(endopeptidase activity);GO:0004222(metalloendopeptidase activity);GO:0005576(extracellular region);GO:0005615(extracellular space);GO:0005783(endoplasmic reticulum);GO:0006508(proteolysis);GO:0007229(integrin-mediated signaling pathway);GO:0008233(peptidase activity);GO:0008237(metallopeptid…	NA	K08624	EC:3.4.24.-	ADAM metallopeptidase with thrombospondin type 1 motif, 9 [Source:RGD Symbol;Acc:1306889]	protein_coding	0.272873	0.084059	0.086949	0.392436	0.53436	0.847707	0.250144	-1.99917	0.00015163	0.0116392	down	yes
ENSRNOG00000018898	Mpi	ENSRNOT00000025783	GO:0003674(molecular_function);GO:0004476(mannose-6-phosphate isomerase activity);GO:0005575(cellular_component);GO:0005737(cytoplasm);GO:0005829(cytosol);GO:0005975(carbohydrate metabolic process);GO:0006486(protein glycosylation);GO:0008150(biological_process);GO:0008270(zinc ion binding);GO:0009298(GDP-mannose biosynthetic process);GO:0016853(isomerase activity);GO:0046872(metal ion binding);G…	00051(Fructose and mannose metabolism);00520(Amino sugar and nucleotide sugar metabolism)	K01809	EC:5.3.1.8	mannose phosphate isomerase [Source:RGD Symbol;Acc:3107]	protein_coding	2.83887	2.08855	2.6369	5.20071	5.01757	5.99888	0.466439	-1.10024	0.000158306	0.0120758	down	yes
ENSRNOG00000004756	Syt2	ENSRNOT00000006637	GO:0005544(calcium-dependent phospholipid binding);GO:0007269(neurotransmitter secretion);GO:0008021(synaptic vesicle);GO:0016020(membrane);GO:0016021(integral component of membrane);GO:0030054(cell junction);GO:0030672(synaptic vesicle membrane);GO:0031410(cytoplasmic vesicle);GO:0042584(chromaffin granule membrane);GO:0045202(synapse);GO:1903861(positive regulation of dendrite extension)	NA	K19902	NA	synaptotagmin 2 [Source:RGD Symbol;Acc:3804]	protein_coding	0.547861	0.660571	0.468535	0.21661	0.074482	0.073752	4.59639	2.2005	0.000163357	0.0123837	up	yes
ENSRNOG00000014320	Inhba	ENSRNOT00000019272	GO:0000082(G1/S transition of mitotic cell cycle);GO:0001541(ovarian follicle development);GO:0001707(mesoderm formation);GO:0001942(hair follicle development);GO:0002244(hematopoietic progenitor cell differentiation);GO:0005102(signaling receptor binding);GO:0005125(cytokine activity);GO:0005179(hormone activity);GO:0005576(extracellular region);GO:0005615(extracellular space);GO:0006357(regulat…	04060(Cytokine-cytokine receptor interaction);04350(TGF-beta signaling pathway);04550(Signaling pathways regulating pluripotency of stem cells)	NA	NA	inhibin subunit beta A [Source:RGD Symbol;Acc:62074]	protein_coding	1.24285	0.902076	0.517431	2.19548	3.19365	2.1027	0.355368	-1.49261	0.000172776	0.0127802	down	yes
ENSRNOG00000047746	AABR07000398	ENSRNOT00000074325	NA	NA	NA	NA		protein_coding	0.843039	1.00063	1.12854	10.4357	1.05189	3.70661	0.195614	-2.35392	0.000174657	0.0128415	down	yes
ENSRNOG00000014018	St8sia1	ENSRNOT00000018999	GO:0003828(alpha-N-acetylneuraminate alpha-2,8-sialyltransferase activity);GO:0005794(Golgi apparatus);GO:0006486(protein glycosylation);GO:0006491(N-glycan processing);GO:0008284(positive regulation of cell population proliferation);GO:0008373(sialyltransferase activity);GO:0009311(oligosaccharide metabolic process);GO:0016020(membrane);GO:0016021(integral component of membrane);GO:0016740(trans…	00601(Glycosphingolipid biosynthesis - lacto and neolacto series);00603(Glycosphingolipid biosynthesis - globo and isoglobo series);00604(Glycosphingolipid biosynthesis - ganglio series)	K03371	EC:2.4.99.8	ST8 alpha-N-acetyl-neuraminide alpha-2,8-sialyltransferase 1 [Source:RGD Symbol;Acc:3679]	protein_coding	1.05344	0.173955	0.29619	2.08506	2.45059	2.44133	0.218373	-2.19514	0.000180472	0.0131896	down	yes
ENSRNOG00000017021	Galnt18	ENSRNOT00000022984	GO:0000139(Golgi membrane);GO:0004653(polypeptide N-acetylgalactosaminyltransferase activity);GO:0005794(Golgi apparatus);GO:0006486(protein glycosylation);GO:0006493(protein O-linked glycosylation);GO:0016020(membrane);GO:0016021(integral component of membrane);GO:0016740(transferase activity);GO:0016757(transferase activity, transferring glycosyl groups);GO:0030246(carbohydrate binding);GO:0046…	00512(Mucin type O-glycan biosynthesis)	K00710	EC:2.4.1.41	polypeptide N-acetylgalactosaminyltransferase 18 [Source:RGD Symbol;Acc:1309623]	protein_coding	0.304008	0.47729	0.453861	1.16443	1.20113	1.31718	0.335392	-1.57608	0.000188753	0.0137127	down	yes
ENSRNOG00000012181	Lpl	ENSRNOT00000016543	GO:0004465(lipoprotein lipase activity);GO:0004620(phospholipase activity);GO:0004806(triglyceride lipase activity);GO:0005102(signaling receptor binding);GO:0005509(calcium ion binding);GO:0005515(protein binding);GO:0005576(extracellular region);GO:0005615(extracellular space);GO:0005886(plasma membrane);GO:0006629(lipid metabolic process);GO:0006631(fatty acid metabolic process);GO:0006633(fat…	00561(Glycerolipid metabolism);03320(PPAR signaling pathway);04979(Cholesterol metabolism);05010(Alzheimer disease)	K01059	EC:3.1.1.34	lipoprotein lipase [Source:RGD Symbol;Acc:3017]	protein_coding	1.66384	1.50809	1.08096	2.35186	2.91628	3.78107	0.469974	-1.08935	0.000227709	0.0160951	down	yes
ENSRNOG00000017244	Rnf186	ENSRNOT00000023358	GO:0004842(ubiquitin-protein transferase activity);GO:0005789(endoplasmic reticulum membrane);GO:0016020(membrane);GO:0016021(integral component of membrane);GO:0035519(protein K29-linked ubiquitination);GO:0043161(proteasome-mediated ubiquitin-dependent protein catabolic process);GO:0046872(metal ion binding);GO:0051865(protein autoubiquitination);GO:0061630(ubiquitin protein ligase activity);GO…	NA	NA	NA	ring finger protein 186 [Source:RGD Symbol;Acc:1596075]	protein_coding	3.5245	1.57948	9.81242	0.785909	0.371671	1.79401	5.05368	2.33733	0.000242223	0.0167974	up	yes
ENSRNOG00000022686	Zdhhc2	ENSRNOT00000036092	GO:0000139(Golgi membrane);GO:0005768(endosome);GO:0005783(endoplasmic reticulum);GO:0005789(endoplasmic reticulum membrane);GO:0005794(Golgi apparatus);GO:0005886(plasma membrane);GO:0005887(integral component of plasma membrane);GO:0006612(protein targeting to membrane);GO:0014069(postsynaptic density);GO:0016020(membrane);GO:0016021(integral component of membrane);GO:0016188(synaptic vesicle m…	NA	K20028	EC:2.3.1.225	zinc finger DHHC-type palmitoyltransferase 2 [Source:RGD Symbol;Acc:628681]	protein_coding	1.48263	1.03544	0.956535	4.02349	2.13798	3.03064	0.377998	-1.40355	0.000265654	0.0181475	down	yes
ENSRNOG00000021513	Rtn4rl2	ENSRNOT00000038250	GO:0005515(protein binding);GO:0005615(extracellular space);GO:0005886(plasma membrane);GO:0007166(cell surface receptor signaling pathway);GO:0009897(external side of plasma membrane);GO:0009986(cell surface);GO:0010977(negative regulation of neuron projection development);GO:0016020(membrane);GO:0022038(corpus callosum development);GO:0030424(axon);GO:0030425(dendrite);GO:0031012(extracellular …	NA	K16661	NA	reticulon 4 receptor-like 2 [Source:RGD Symbol;Acc:727797]	protein_coding	5.41103	1.97355	3.0233	9.9505	9.72935	6.59812	0.396069	-1.33618	0.000274604	0.0185168	down	yes
ENSRNOG00000020775	Cyp2b2	ENSRNOT00000047540;ENSRNOT00000028196	GO:0004497(monooxygenase activity);GO:0005506(iron ion binding);GO:0016020(membrane);GO:0016491(oxidoreductase activity);GO:0016705(oxidoreductase activity, acting on paired donors, with incorporation or reduction of molecular oxygen);GO:0016712(oxidoreductase activity, acting on paired donors, with incorporation or reduction of molecular oxygen, reduced flavin or flavoprotein as one donor, and i…	00140(Steroid hormone biosynthesis);00590(Arachidonic acid metabolism);00830(Retinol metabolism);05204(Chemical carcinogenesis);05204(Chemical carcinogenesis)	K07412	EC:1.14.14.1	cytochrome P450, family 2, subfamily b, polypeptide 2 [Source:RGD Symbol;Acc:2467]	protein_coding	18.9136	5.22238	6.28714	31.5415	23.4023	28.6258	0.364046	-1.45781	0.000292574	0.019302	down	yes
ENSRNOG00000016552	Hmgcs1	ENSRNOT00000023554	GO:0001889(liver development);GO:0003824(catalytic activity);GO:0004421(hydroxymethylglutaryl-CoA synthase activity);GO:0005737(cytoplasm);GO:0005829(cytosol);GO:0006084(acetyl-CoA metabolic process);GO:0006629(lipid metabolic process);GO:0006694(steroid biosynthetic process);GO:0006695(cholesterol biosynthetic process);GO:0007420(brain development);GO:0008144(drug binding);GO:0008202(steroid met…	00072(Synthesis and degradation of ketone bodies);00280(Valine, leucine and isoleucine degradation);00650(Butanoate metabolism);00900(Terpenoid backbone biosynthesis)	NA	NA	3-hydroxy-3-methylglutaryl-CoA synthase 1 [Source:RGD Symbol;Acc:70970]	protein_coding	69.3942	30.4039	33.3818	109.181	89.1309	84.5961	0.470754	-1.08696	0.0003112	0.0203112	down	yes
ENSRNOG00000011200	Bhmt	ENSRNOT00000015336	GO:0005829(cytosol);GO:0006577(amino-acid betaine metabolic process);GO:0008168(methyltransferase activity);GO:0008270(zinc ion binding);GO:0009086(methionine biosynthetic process);GO:0016740(transferase activity);GO:0032259(methylation);GO:0046872(metal ion binding);GO:0047150(betaine-homocysteine S-methyltransferase activity);GO:0070062(extracellular exosome);GO:0071267(L-methionine salvage)	00260(Glycine, serine and threonine metabolism);00270(Cysteine and methionine metabolism)	K00544	EC:2.1.1.5	betaine-homocysteine S-methyltransferase [Source:RGD Symbol;Acc:621496]	protein_coding	1077.78	780.646	1781.82	682.295	584.274	524.163	2.03283	1.02349	0.000332096	0.0214457	up	yes
ENSRNOG00000015149	Nrg4	ENSRNOT00000020332;ENSRNOT00000083900	GO:0003674(molecular_function);GO:0005102(signaling receptor binding);GO:0007399(nervous system development);GO:0008150(biological_process);GO:0016020(membrane);GO:0016021(integral component of membrane);GO:0016021(integral component of membrane)	04012(ErbB signaling pathway);04012(ErbB signaling pathway)	K05458	NA	neuregulin 4 [Source:RGD Symbol;Acc:1589860]	protein_coding	0.794986	1.41061	2.86852	0.246532	0.559278	0.230861	4.89463	2.2912	0.000336748	0.0215184	up	yes
ENSRNOG00000016593	Pde6c	ENSRNOT00000022317	GO:0003674(molecular_function);GO:0004114(3',5'-cyclic-nucleotide phosphodiesterase activity);GO:0005515(protein binding);GO:0005575(cellular_component);GO:0007165(signal transduction);GO:0007601(visual perception);GO:0007603(phototransduction, visible light);GO:0008081(phosphoric diester hydrolase activity);GO:0008150(biological_process);GO:0016787(hydrolase activity);GO:0046549(retinal cone cel…	00230(Purine metabolism)	K13757	EC:3.1.4.35	phosphodiesterase 6C [Source:RGD Symbol;Acc:1309844]	protein_coding	0.368229	1.0938	0.571277	0.244176	0.055498	0.087556	5.25089	2.39256	0.000339271	0.0215667	up	yes
ENSRNOG00000014718	Acsl3	ENSRNOT00000020161	GO:0000166(nucleotide binding);GO:0001676(long-chain fatty acid metabolic process);GO:0003824(catalytic activity);GO:0003996(acyl-CoA ligase activity);GO:0004467(long-chain fatty acid-CoA ligase activity);GO:0005524(ATP binding);GO:0005575(cellular_component);GO:0005739(mitochondrion);GO:0005741(mitochondrial outer membrane);GO:0005777(peroxisome);GO:0005778(peroxisomal membrane);GO:0005783(endop…	00061(Fatty acid biosynthesis);00071(Fatty acid degradation);03320(PPAR signaling pathway);04146(Peroxisome);04216(Ferroptosis);04714(Thermogenesis);04920(Adipocytokine signaling pathway)	K01897	EC:6.2.1.3	acyl-CoA synthetase long-chain family member 3 [Source:RGD Symbol;Acc:70552]	protein_coding	1.39453	1.16121	0.387856	5.74143	2.90477	1.71095	0.284209	-1.81497	0.00036792	0.0229105	down	yes
ENSRNOG00000008015	Fos	ENSRNOT00000010712	GO:0000976(transcription regulatory region sequence-specific DNA binding);GO:0000978(RNA polymerase II cis-regulatory region sequence-specific DNA binding);GO:0000979(RNA polymerase II core promoter sequence-specific DNA binding);GO:0000981(DNA-binding transcription factor activity, RNA polymerase II-specific);GO:0001102(RNA polymerase II activating transcription factor binding);GO:0001228(DNA-bi…	01522(Endocrine resistance);04010(MAPK signaling pathway);04024(cAMP signaling pathway);04210(Apoptosis);04380(Osteoclast differentiation);04620(Toll-like receptor signaling pathway);04657(IL-17 signaling pathway);04658(Th1 and Th2 cell differentiation);04659(Th17 cell differentiation);04660(T cell receptor signaling pathway);04662(B cell receptor signaling pathway);04668(TNF signaling pathway);0…	K04379	NA	Fos proto-oncogene, AP-1 transcription factor subunit [Source:RGD Symbol;Acc:2626]	protein_coding	1.19321	2.67715	7.75512	1.30603	0.8095	0.686271	4.14929	2.05287	0.000404314	0.0246175	up	yes
ENSRNOG00000011250	Inmt	ENSRNOT00000015316	GO:0004790(thioether S-methyltransferase activity);GO:0005737(cytoplasm);GO:0005829(cytosol);GO:0008168(methyltransferase activity);GO:0008170(N-methyltransferase activity);GO:0009308(amine metabolic process);GO:0016740(transferase activity);GO:0030748(amine N-methyltransferase activity);GO:0032259(methylation)	00380(Tryptophan metabolism);00450(Selenocompound metabolism)	K00562	2.1.1.96;EC:2.1.1.49	indolethylamine N-methyltransferase [Source:RGD Symbol;Acc:1597087]	protein_coding	8.3399	38.7791	73.5265	14.6992	8.23082	10.2205	3.63933	1.86367	0.000409451	0.0246175	up	yes
ENSRNOG00000005615	Gadd45a	ENSRNOT00000007698	GO:0000122(negative regulation of transcription by RNA polymerase II);GO:0000185(activation of MAPKKK activity);GO:0005634(nucleus);GO:0005737(cytoplasm);GO:0006469(negative regulation of protein kinase activity);GO:0007098(centrosome cycle);GO:0016525(negative regulation of angiogenesis);GO:0016607(nuclear speck);GO:0019900(kinase binding);GO:0033140(negative regulation of peptidyl-serine phosph…	04010(MAPK signaling pathway);04068(FoxO signaling pathway);04110(Cell cycle);04115(p53 signaling pathway);04210(Apoptosis);04218(Cellular senescence);05169(Epstein-Barr virus infection);05200(Pathways in cancer);05202(Transcriptional misregulation in cancer);05210(Colorectal cancer);05212(Pancreatic cancer);05213(Endometrial cancer);05214(Glioma);05216(Thyroid cancer);05217(Basal cell carcinoma)…	K04402	NA	growth arrest and DNA-damage-inducible, alpha [Source:RGD Symbol;Acc:2654]	protein_coding	23.5702	15.2811	42.7305	9.55106	9.80405	16.8566	2.25291	1.17179	0.000429287	0.0255583	up	yes
ENSRNOG00000003634	Zfp354a	ENSRNOT00000045596;ENSRNOT00000085203	GO:0000122(negative regulation of transcription by RNA polymerase II);GO:0001666(response to hypoxia);GO:0001822(kidney development);GO:0003676(nucleic acid binding);GO:0003677(DNA binding);GO:0003700(DNA-binding transcription factor activity);GO:0005634(nucleus);GO:0005654(nucleoplasm);GO:0005730(nucleolus);GO:0005829(cytosol);GO:0006355(regulation of transcription, DNA-templated);GO:0007275(mul…	05168(Herpes simplex virus 1 infection);05168(Herpes simplex virus 1 infection)	K09228	NA	zinc finger protein 354A [Source:RGD Symbol;Acc:2967]	protein_coding	13.6776	32.6164	6.47231	5.01312	7.62473	5.77197	2.86621	1.51914	0.000448316	0.0262758	up	yes
ENSRNOG00000027024	Rgs16	ENSRNOT00000032236	GO:0005096(GTPase activator activity);GO:0005737(cytoplasm);GO:0007186(G protein-coupled receptor signaling pathway);GO:0031224(intrinsic component of membrane);GO:0043547(positive regulation of GTPase activity)	NA	K16449	NA	regulator of G-protein signaling 16 [Source:RGD Symbol;Acc:1589741]	protein_coding	5.09029	3.19277	13.98	1.02358	3.17504	2.78288	3.18885	1.67304	0.000495264	0.0279847	up	yes
ENSRNOG00000026600	Caps2	ENSRNOT00000087341;ENSRNOT00000039141	GO:0005509(calcium ion binding);GO:0005509(calcium ion binding)	NA	NA	NA	calcyphosine 2 [Source:RGD Symbol;Acc:1309826]	protein_coding	0.420653	0.601341	0.509368	0.164807	0.167845	0.157013	3.12737	1.64495	0.00050253	0.0281087	up	yes
ENSRNOG00000016173	Cyp1a2	ENSRNOT00000021653	GO:0004497(monooxygenase activity);GO:0005506(iron ion binding);GO:0005783(endoplasmic reticulum);GO:0005789(endoplasmic reticulum membrane);GO:0006629(lipid metabolic process);GO:0006631(fatty acid metabolic process);GO:0006706(steroid catabolic process);GO:0006725(cellular aromatic compound metabolic process);GO:0006778(porphyrin-containing compound metabolic process);GO:0006805(xenobiotic meta…	00140(Steroid hormone biosynthesis);00232(Caffeine metabolism);00380(Tryptophan metabolism);00591(Linoleic acid metabolism);00830(Retinol metabolism);00980(Metabolism of xenobiotics by cytochrome P450);00982(Drug metabolism - cytochrome P450);05204(Chemical carcinogenesis)	K07409	EC:1.14.14.1	cytochrome P450, family 1, subfamily a, polypeptide 2 [Source:RGD Symbol;Acc:2459]	protein_coding	254.01	339.171	493.499	233.469	173.945	135.292	2.00234	1.00169	0.000504367	0.0281087	up	yes
ENSRNOG00000036659	Fn3k	ENSRNOT00000054915	GO:0016301(kinase activity);GO:0016310(phosphorylation);GO:0030387(fructosamine-3-kinase activity);GO:0030389(fructosamine metabolic process);GO:0030855(epithelial cell differentiation);GO:0036525(protein deglycation);GO:0102193(protein-ribulosamine 3-kinase activity)	NA	K15522	EC:2.7.1.171	fructosamine 3 kinase [Source:RGD Symbol;Acc:1559983]	protein_coding	7.47903	10.2827	9.1676	4.52104	3.686	1.54795	2.76057	1.46497	0.000539208	0.0296438	up	yes
ENSRNOG00000002456	Hlf	ENSRNOT00000055664	GO:0001228(DNA-binding transcription activator activity, RNA polymerase II-specific);GO:0003677(DNA binding);GO:0003700(DNA-binding transcription factor activity);GO:0005634(nucleus);GO:0005654(nucleoplasm);GO:0006355(regulation of transcription, DNA-templated);GO:0006357(regulation of transcription by RNA polymerase II);GO:0035914(skeletal muscle cell differentiation);GO:0043565(sequence-specifi…	NA	K09057	NA	HLF transcription factor, PAR bZIP family member [Source:RGD Symbol;Acc:1582828]	protein_coding	7.38338	8.11849	7.74428	4.10389	3.78597	2.9343	2.14762	1.10274	0.000541827	0.0296438	up	yes
ENSRNOG00000004500	Myc	ENSRNOT00000006188;ENSRNOT00000092876;ENSRNOT00000092908	GO:0000122(negative regulation of transcription by RNA polymerase II);GO:0000165(MAPK cascade);GO:0000320(re-entry into mitotic cell cycle);GO:0000790(nuclear chromatin);GO:0000978(RNA polymerase II cis-regulatory region sequence-specific DNA binding);GO:0000981(DNA-binding transcription factor activity, RNA polymerase II-specific);GO:0000987(cis-regulatory region sequence-specific DNA binding);G…	04010(MAPK signaling pathway);04012(ErbB signaling pathway);04110(Cell cycle);04151(PI3K-Akt signaling pathway);04218(Cellular senescence);04310(Wnt signaling pathway);04350(TGF-beta signaling pathway);04390(Hippo signaling pathway);04550(Signaling pathways regulating pluripotency of stem cells);04630(Jak-STAT signaling pathway);04919(Thyroid hormone signaling pathway);05160(Hepatitis C);05161(He…	K04377	NA	MYC proto-oncogene, bHLH transcription factor [Source:RGD Symbol;Acc:3130]	protein_coding;retained_intron	8.76044	4.34229	15.4412	3.23697	3.80944	5.13191	2.34383	1.22887	0.000544056	0.0296438	up	yes
ENSRNOG00000004621	Rtn4	ENSRNOT00000042965;ENSRNOT00000006443;ENSRNOT00000006957;ENSRNOT00000041638	GO:0001525(angiogenesis);GO:0001825(blastocyst formation);GO:0002523(leukocyte migration involved in inflammatory response);GO:0005515(protein binding);GO:0005635(nuclear envelope);GO:0005737(cytoplasm);GO:0005783(endoplasmic reticulum);GO:0005789(endoplasmic reticulum membrane);GO:0005886(plasma membrane);GO:0007029(endoplasmic reticulum organization);GO:0007399(nervous system development);GO:00…	05010(Alzheimer disease);05010(Alzheimer disease)	K20720	NA	reticulon 4 [Source:RGD Symbol;Acc:620989]	protein_coding	1.16306	1.62126	1.70381	4.29756	2.35405	2.43318	0.494028	-1.01734	0.00057267	0.0307905	down	yes
ENSRNOG00000005109	Rprm	ENSRNOT00000006784	GO:0005737(cytoplasm);GO:0007050(cell cycle arrest);GO:0007346(regulation of mitotic cell cycle);GO:0016020(membrane);GO:0016021(integral component of membrane)	04115(p53 signaling pathway)	K10128	NA	reprimo, TP53 dependent G2 arrest mediator homolog [Source:RGD Symbol;Acc:1595512]	protein_coding	0.254872	0.500596	0.025481	2.04108	1.6124	1.02466	0.166936	-2.58264	0.000580935	0.0310979	down	yes
ENSRNOG00000013464	Spink1	ENSRNOT00000018110	GO:0004867(serine-type endopeptidase inhibitor activity);GO:0005515(protein binding);GO:0005576(extracellular region);GO:0005615(extracellular space);GO:0005737(cytoplasm);GO:0007204(positive regulation of cytosolic calcium ion concentration);GO:0010466(negative regulation of peptidase activity);GO:0010751(negative regulation of nitric oxide mediated signal transduction);GO:0030414(peptidase inhi…	NA	NA	NA	serine peptidase inhibitor, Kazal type 1 [Source:RGD Symbol;Acc:3749]	protein_coding	6.74745	5.26788	4.26745	1.79995	1.68833	2.65191	2.65183	1.40699	0.000605507	0.0319922	up	yes
ENSRNOG00000010071	RGD1560010	ENSRNOT00000013356	NA	NA	NA	NA	RGD1560010 [Source:RGD Symbol;Acc:1560010]	protein_coding	0.716755	0.312159	0.758608	0.850926	2.57158	2.59501	0.297053	-1.75121	0.000723758	0.037272	down	yes
ENSRNOG00000029614	Robo1	ENSRNOT00000087080;ENSRNOT00000042384	GO:0002042(cell migration involved in sprouting angiogenesis);GO:0005515(protein binding);GO:0005737(cytoplasm);GO:0005886(plasma membrane);GO:0006919(activation of cysteine-type endopeptidase activity involved in apoptotic process);GO:0007156(homophilic cell adhesion via plasma membrane adhesion molecules);GO:0007411(axon guidance);GO:0008046(axon guidance receptor activity);GO:0009986(cell surf…	04360(Axon guidance);04360(Axon guidance)	K06753	NA	roundabout guidance receptor 1 [Source:RGD Symbol;Acc:61941]	protein_coding	0.139509	0.0608983	0.11315	0.216747	0.375924	0.516851	0.282606	-1.82314	0.000744137	0.0380008	down	yes
ENSRNOG00000023664	Lepr	ENSRNOT00000093574;ENSRNOT00000093171;ENSRNOT00000093648;ENSRNOT00000044131;ENSRNOT00000093218;ENSRNOT00000050597	GO:0001525(angiogenesis);GO:0001934(positive regulation of protein phosphorylation);GO:0004896(cytokine receptor activity);GO:0005515(protein binding);GO:0005886(plasma membrane);GO:0010507(negative regulation of autophagy);GO:0016020(membrane);GO:0016021(integral component of membrane);GO:0016323(basolateral plasma membrane);GO:0016328(lateral plasma membrane);GO:0033210(leptin-mediated signalin…	04060(Cytokine-cytokine receptor interaction);04080(Neuroactive ligand-receptor interaction);04152(AMPK signaling pathway);04630(Jak-STAT signaling pathway);04920(Adipocytokine signaling pathway);04932(Non-alcoholic fatty liver disease (NAFLD));04932(Non-alcoholic fatty liver disease (NAFLD))	K05062	NA	leptin receptor [Source:RGD Symbol;Acc:3001]	processed_transcript;protein_coding	1.28004	2.46482	3.50001	1.0775	0.548765	1.41173	2.38475	1.25384	0.000760441	0.0385111	up	yes
ENSRNOG00000002802	Cxcl1	ENSRNOT00000003778	GO:0005125(cytokine activity);GO:0005576(extracellular region);GO:0005615(extracellular space);GO:0006935(chemotaxis);GO:0006952(defense response);GO:0006955(immune response);GO:0007165(signal transduction);GO:0008009(chemokine activity);GO:0032930(positive regulation of superoxide anion generation);GO:0060326(cell chemotaxis);GO:0070965(positive regulation of neutrophil mediated killing of fungu…	04060(Cytokine-cytokine receptor interaction);04062(Chemokine signaling pathway);04621(NOD-like receptor signaling pathway);04657(IL-17 signaling pathway);04668(TNF signaling pathway);05132(Salmonella infection);05134(Legionellosis);05167(Kaposi sarcoma-associated herpesvirus infection)	K05505	NA	C-X-C motif chemokine ligand 1 [Source:RGD Symbol;Acc:619869]	protein_coding	2.0083	1.49961	14.0533	1.09657	1.34878	0.984928	5.11946	2.35599	0.000776309	0.0389961	up	yes
ENSRNOG00000046246	AABR07015881	ENSRNOT00000075130	GO:0005576(extracellular region);GO:0007155(cell adhesion);GO:0031012(extracellular matrix)	NA	NA	NA		protein_coding	1.25367	0.605165	0.704365	3.0987	1.97303	2.97996	0.318343	-1.65135	0.000782465	0.0391393	down	yes
ENSRNOG00000052651	LOC102556085	ENSRNOT00000083380	NA	NA	NA	NA	sodium/nucleoside cotransporter 2-like [Source:RGD Symbol;Acc:7516973]	lincRNA	5.27714	4.1381	2.93421	11.3184	11.999	6.40795	0.415451	-1.26725	0.000792901	0.0393389	down	yes
ENSRNOG00000012665	Nmrk1	ENSRNOT00000016930	GO:0000166(nucleotide binding);GO:0003674(molecular_function);GO:0005524(ATP binding);GO:0005575(cellular_component);GO:0008150(biological_process);GO:0009435(NAD biosynthetic process);GO:0016301(kinase activity);GO:0016310(phosphorylation);GO:0016740(transferase activity);GO:0019363(pyridine nucleotide biosynthetic process);GO:0046872(metal ion binding);GO:0050262(ribosylnicotinamide kinase acti…	00760(Nicotinate and nicotinamide metabolism)	K10524	2.7.1.173;EC:2.7.1.22	nicotinamide riboside kinase 1 [Source:RGD Symbol;Acc:1564687]	protein_coding	2.65244	3.11031	2.9431	1.1744	1.40995	1.42947	2.16897	1.11701	0.000800202	0.0395403	up	yes
ENSRNOG00000026415	Col14a1	ENSRNOT00000067649	GO:0003229(ventricular cardiac muscle tissue development);GO:0005515(protein binding);GO:0005576(extracellular region);GO:0005581(collagen trimer);GO:0005614(interstitial matrix);GO:0005615(extracellular space);GO:0030199(collagen fibril organization);GO:0048873(homeostasis of number of cells within a tissue);GO:0061050(regulation of cell growth involved in cardiac muscle cell development);GO:006…	04974(Protein digestion and absorption)	K08133	NA	collagen type XIV alpha 1 chain [Source:RGD Symbol;Acc:1305806]	protein_coding	3.39066	4.13617	1.73734	5.09435	5.39644	9.25824	0.469095	-1.09205	0.000816696	0.0401926	down	yes
ENSRNOG00000012040	Slc25a48	ENSRNOT00000016138	GO:0005347(ATP transmembrane transporter activity);GO:0006844(acyl carnitine transport);GO:0006865(amino acid transport);GO:0015227(acyl carnitine transmembrane transporter activity);GO:0015867(ATP transport);GO:0016020(membrane);GO:0016021(integral component of membrane);GO:0055085(transmembrane transport);GO:1902616(acyl carnitine transmembrane transport)	NA	K15124	NA	solute carrier family 25, member 48 [Source:RGD Symbol;Acc:1563703]	protein_coding	3.48371	6.26566	3.34754	2.15995	1.30067	1.17548	2.82499	1.49825	0.000830693	0.0404057	up	yes
ENSRNOG00000007387	Per1	ENSRNOT00000057136	GO:0000122(negative regulation of transcription by RNA polymerase II);GO:0000976(transcription regulatory region sequence-specific DNA binding);GO:0000978(RNA polymerase II cis-regulatory region sequence-specific DNA binding);GO:0002028(regulation of sodium ion transport);GO:0005515(protein binding);GO:0005634(nucleus);GO:0005654(nucleoplasm);GO:0005737(cytoplasm);GO:0005829(cytosol);GO:0007623(c…	04710(Circadian rhythm);04713(Circadian entrainment)	K21944	NA	period circadian regulator 1 [Source:RGD Symbol;Acc:727863]	protein_coding	10.0263	13.9598	8.28882	2.81331	7.27056	5.46609	2.07556	1.0535	0.00083237	0.0404057	up	yes
ENSRNOG00000026764	Pla2g4c	ENSRNOT00000058334;ENSRNOT00000033633	GO:0004620(phospholipase activity);GO:0004623(phospholipase A2 activity);GO:0005509(calcium ion binding);GO:0005544(calcium-dependent phospholipid binding);GO:0005635(nuclear envelope);GO:0005654(nucleoplasm);GO:0005829(cytosol);GO:0005938(cell cortex);GO:0006629(lipid metabolic process);GO:0009395(phospholipid catabolic process);GO:0016042(lipid catabolic process);GO:0016787(hydrolase activity);…	00564(Glycerophospholipid metabolism);00565(Ether lipid metabolism);00590(Arachidonic acid metabolism);00591(Linoleic acid metabolism);00592(alpha-Linolenic acid metabolism);04010(MAPK signaling pathway);04014(Ras signaling pathway);04072(Phospholipase D signaling pathway);04217(Necroptosis);04270(Vascular smooth muscle contraction);04370(VEGF signaling pathway);04611(Platelet activation);04664(F…	K16342	EC:3.1.1.4	phospholipase A2 group IVC [Source:RGD Symbol;Acc:1594658]	protein_coding	0.0818807	0.0811076	0.0228556	0.175528	0.253766	0.36341	0.234443	-2.09269	0.000834268	0.0404057	down	yes
ENSRNOG00000025079	Fam126b	ENSRNOT00000037660	GO:0005737(cytoplasm);GO:0005829(cytosol);GO:0005886(plasma membrane);GO:0016020(membrane);GO:0046854(phosphatidylinositol phosphorylation);GO:0072659(protein localization to plasma membrane)	NA	K21844	NA	family with sequence similarity 126, member B [Source:RGD Symbol;Acc:1309752]	protein_coding	2.31211	2.40182	3.70572	1.32795	1.22834	1.16721	2.26122	1.1771	0.000854364	0.0410532	up	yes
ENSRNOG00000001143	Cit	ENSRNOT00000086716;ENSRNOT00000057036;ENSRNOT00000041281	GO:0000070(mitotic sister chromatid segregation);GO:0000086(G2/M transition of mitotic cell cycle);GO:0000166(nucleotide binding);GO:0000278(mitotic cell cycle);GO:0000281(mitotic cytokinesis);GO:0001726(ruffle);GO:0001889(liver development);GO:0004672(protein kinase activity);GO:0004674(protein serine/threonine kinase activity);GO:0005524(ATP binding);GO:0005634(nucleus);GO:0005737(cytoplasm);GO…	NA	K16308	EC:2.7.11.1	citron rho-interacting serine/threonine kinase [Source:RGD Symbol;Acc:70878]	protein_coding	0.046053	0.0870768	0.10015	0.143357	0.284219	0.340519	0.303713	-1.71922	0.000892498	0.0422207	down	yes
ENSRNOG00000007370	Rnf144a	ENSRNOT00000009877	GO:0000151(ubiquitin ligase complex);GO:0000209(protein polyubiquitination);GO:0004842(ubiquitin-protein transferase activity);GO:0005737(cytoplasm);GO:0005794(Golgi apparatus);GO:0006511(ubiquitin-dependent protein catabolic process);GO:0016020(membrane);GO:0016021(integral component of membrane);GO:0016567(protein ubiquitination);GO:0031624(ubiquitin conjugating enzyme binding);GO:0032436(posit…	NA	K11975	EC:2.3.2.31	ring finger protein 144A [Source:RGD Symbol;Acc:1561737]	protein_coding	0.191291	0.205891	0.35884	0.361497	1.07856	0.814904	0.335271	-1.5766	0.000966049	0.0450024	down	yes
ENSRNOG00000036641	LOC689065	ENSRNOT00000054848	NA	NA	NA	NA	RIKEN cDNA 2010003K11 gene [Source:MGI Symbol;Acc:MGI:1917111]	protein_coding	0.175323	0.220698	0.496143	1.25256	0.692108	1.37547	0.268713	-1.89586	0.000991081	0.0458442	down	yes
ENSRNOG00000027271	RGD1359290	ENSRNOT00000029782	GO:0002181(cytoplasmic translation);GO:0003735(structural constituent of ribosome);GO:0005840(ribosome);GO:0006412(translation);GO:0015934(large ribosomal subunit);GO:0022625(cytosolic large ribosomal subunit)	NA	NA	NA	Ribosomal_L22 domain containing protein RGD1359290 [Source:RGD Symbol;Acc:1359290]	protein_coding	11.2691	33.9894	11.3739	38.5487	44.9641	50.9838	0.42107	-1.24787	0.000991632	0.0458442	down	yes
ENSRNOG00000042630	Asb5	ENSRNOT00000089665;ENSRNOT00000066639	GO:0005515(protein binding);GO:0016020(membrane);GO:0016021(integral component of membrane);GO:0016567(protein ubiquitination);GO:0035556(intracellular signal transduction);GO:0045732(positive regulation of protein catabolic process);GO:0045732(positive regulation of protein catabolic process)	NA	K10327	NA	ankyrin repeat and SOCS box-containing 5 [Source:RGD Symbol;Acc:1565973]	protein_coding	0.43749	0.61611	0.463744	0.226975	0.0744848	0.0555184	4.25053	2.08764	0.00102008	0.0466293	up	yes
ENSRNOG00000060393	AABR07068044	ENSRNOT00000088594	NA	NA	NA	NA		lincRNA	0.956891	0.983413	0.393378	2.31234	4.67346	2.12858	0.256044	-1.96554	0.00113689	0.0506416	down	yes
ENSRNOG00000012987	Ptk6	ENSRNOT00000017337	GO:0000166(nucleotide binding);GO:0001726(ruffle);GO:0004672(protein kinase activity);GO:0004713(protein tyrosine kinase activity);GO:0004715(non-membrane spanning protein tyrosine kinase activity);GO:0005102(signaling receptor binding);GO:0005515(protein binding);GO:0005524(ATP binding);GO:0005634(nucleus);GO:0005654(nucleoplasm);GO:0005737(cytoplasm);GO:0005829(cytosol);GO:0005886(plasma membra…	NA	K08894	EC:2.7.10.2	protein tyrosine kinase 6 [Source:RGD Symbol;Acc:1309098]	protein_coding	0.193046	0.074285	0.0001	1.12696	0.765495	0.218976	0.126659	-2.98098	0.001167	0.0517936	down	yes
ENSRNOG00000011213	Blm	ENSRNOT00000015065	GO:0000079(regulation of cyclin-dependent protein serine/threonine kinase activity);GO:0000166(nucleotide binding);GO:0000228(nuclear chromosome);GO:0000400(four-way junction DNA binding);GO:0000403(Y-form DNA binding);GO:0000405(bubble DNA binding);GO:0000723(telomere maintenance);GO:0000724(double-strand break repair via homologous recombination);GO:0000729(DNA double-strand break processing);G…	03440(Homologous recombination);03460(Fanconi anemia pathway)	K10901	EC:3.6.4.12	BLM RecQ like helicase [Source:RGD Symbol;Acc:1308810]	protein_coding	0.681246	0.642705	0.646698	0.312653	0.234135	0.20517	2.62069	1.38995	0.0012073	0.052924	up	yes
ENSRNOG00000001009	Bri3	ENSRNOT00000092432;ENSRNOT00000092487;ENSRNOT00000092576;ENSRNOT00000092687;ENSRNOT00000092249;ENSRNOT00000001336	GO:0005737(cytoplasm);GO:0005764(lysosome);GO:0005765(lysosomal membrane);GO:0016020(membrane);GO:0016021(integral component of membrane);GO:0042802(identical protein binding);GO:0048471(perinuclear region of cytoplasm);GO:0048471(perinuclear region of cytoplasm)	NA	NA	NA	brain protein I3 [Source:RGD Symbol;Acc:1309187]	processed_transcript;protein_coding	22.3791	21.7488	23.2214	11.723	4.60434	15.7179	2.1017	1.07156	0.0012612	0.0543922	up	yes
ENSRNOG00000019659	Aspa	ENSRNOT00000093230;ENSRNOT00000093482;ENSRNOT00000049311;ENSRNOT00000084432;ENSRNOT00000093579;ENSRNOT00000093495	GO:0005634(nucleus);GO:0005737(cytoplasm);GO:0005829(cytosol);GO:0016787(hydrolase activity);GO:0016788(hydrolase activity, acting on ester bonds);GO:0016811(hydrolase activity, acting on carbon-nitrogen (but not peptide) bonds, in linear amides);GO:0019807(aspartoacylase activity);GO:0022010(central nervous system myelination);GO:0042802(identical protein binding);GO:0046872(metal ion binding);G…	00250(Alanine, aspartate and glutamate metabolism);00340(Histidine metabolism);00340(Histidine metabolism)	K01437	EC:3.5.1.15	aspartoacylase [Source:RGD Symbol;Acc:621693]	protein_coding;retained_intron	0.238719	0.459146	0.434923	1.40194	1.32793	0.655501	0.334613	-1.57943	0.00136327	0.0575733	down	yes
ENSRNOG00000015858	Hyal1	ENSRNOT00000021408	GO:0000302(response to reactive oxygen species);GO:0003824(catalytic activity);GO:0004415(hyalurononglucosaminidase activity);GO:0005615(extracellular space);GO:0005737(cytoplasm);GO:0005764(lysosome);GO:0005975(carbohydrate metabolic process);GO:0006954(inflammatory response);GO:0008134(transcription factor binding);GO:0008152(metabolic process);GO:0009615(response to virus);GO:0010634(positive …	00531(Glycosaminoglycan degradation);04142(Lysosome)	K01197	EC:3.2.1.35	hyaluronidase 1 [Source:RGD Symbol;Acc:1303060]	protein_coding	11.1316	16.1707	17.9393	10.893	6.47092	4.5814	2.06157	1.04374	0.00138848	0.058235	up	yes
ENSRNOG00000003616	Grem2	ENSRNOT00000004803	GO:0005125(cytokine activity);GO:0005576(extracellular region);GO:0005615(extracellular space);GO:0008201(heparin binding);GO:0009887(animal organ morphogenesis);GO:0010172(embryonic body morphogenesis);GO:0019221(cytokine-mediated signaling pathway);GO:0030514(negative regulation of BMP signaling pathway);GO:0036122(BMP binding);GO:0038098(sequestering of BMP from receptor via BMP binding);GO:00…	04350(TGF-beta signaling pathway)	NA	NA	gremlin 2, DAN family BMP antagonist [Source:RGD Symbol;Acc:1560008]	protein_coding	1.02899	2.12847	2.01763	0.975846	0.600756	0.331722	2.71185	1.43928	0.00140466	0.0587121	up	yes
ENSRNOG00000032944	AABR07049320	ENSRNOT00000046475	GO:0003676(nucleic acid binding);GO:0003723(RNA binding);GO:0003735(structural constituent of ribosome);GO:0005829(cytosol);GO:0005840(ribosome);GO:0006412(translation);GO:0015935(small ribosomal subunit)	NA	NA	NA		protein_coding	10.4486	2.30455	1.24156	1.15441	0.855111	0.81625	4.95253	2.30816	0.00141923	0.0590655	up	yes
ENSRNOG00000045636	Fasn	ENSRNOT00000073321	GO:0002068(glandular epithelial cell development);GO:0003824(catalytic activity);GO:0004312(fatty acid synthase activity);GO:0004313([acyl-carrier-protein] S-acetyltransferase activity);GO:0004314([acyl-carrier-protein] S-malonyltransferase activity);GO:0004315(3-oxoacyl-[acyl-carrier-protein] synthase activity);GO:0004316(3-oxoacyl-[acyl-carrier-protein] reductase (NADPH) activity);GO:0004317(3-…	00061(Fatty acid biosynthesis);04152(AMPK signaling pathway);04910(Insulin signaling pathway)	K00665	EC:2.3.1.85	fatty acid synthase [Source:RGD Symbol;Acc:620665]	protein_coding	2.12811	1.86903	0.843872	5.44951	3.34822	2.26584	0.437564	-1.19243	0.0014228	0.0590655	down	yes
ENSRNOG00000017901	Acy3	ENSRNOT00000024112	GO:0004046(aminoacylase activity);GO:0005737(cytoplasm);GO:0005829(cytosol);GO:0005886(plasma membrane);GO:0016020(membrane);GO:0016324(apical plasma membrane);GO:0016787(hydrolase activity);GO:0016788(hydrolase activity, acting on ester bonds);GO:0016811(hydrolase activity, acting on carbon-nitrogen (but not peptide) bonds, in linear amides);GO:0042802(identical protein binding);GO:0046872(metal…	NA	K18458	EC:3.5.1.114	aminoacylase 3 [Source:RGD Symbol;Acc:1305394]	protein_coding	13.6146	39.4873	21.328	11.3776	13.0143	12.1977	2.03418	1.02445	0.00144707	0.0594662	up	yes
ENSRNOG00000002072	Eva1c	ENSRNOT00000002838	GO:0005576(extracellular region);GO:0008201(heparin binding);GO:0016020(membrane);GO:0016021(integral component of membrane);GO:0030246(carbohydrate binding)	NA	NA	NA	eva-1 homolog C [Source:RGD Symbol;Acc:1307569]	protein_coding	1.10906	0.915784	0.632253	0.142376	0.283898	0.417256	3.14997	1.65534	0.00147924	0.0605842	up	yes
ENSRNOG00000012686	Pomc	ENSRNOT00000016976	GO:0001664(G protein-coupled receptor binding);GO:0005102(signaling receptor binding);GO:0005179(hormone activity);GO:0005576(extracellular region);GO:0005615(extracellular space);GO:0005737(cytoplasm);GO:0006091(generation of precursor metabolites and energy);GO:0007165(signal transduction);GO:0007218(neuropeptide signaling pathway);GO:0007267(cell-cell signaling);GO:0008217(regulation of blood …	04024(cAMP signaling pathway);04080(Neuroactive ligand-receptor interaction);04915(Estrogen signaling pathway);04916(Melanogenesis);04920(Adipocytokine signaling pathway);04925(Aldosterone synthesis and secretion);04927(Cortisol synthesis and secretion);04934(Cushing syndrome)	K05228	NA	proopiomelanocortin [Source:RGD Symbol;Acc:3366]	protein_coding	1.28611	0.898858	1.22029	0.338242	0.335242	0.412515	3.1356	1.64874	0.00149109	0.0608469	up	yes
ENSRNOG00000060775	Lmo7	ENSRNOT00000084471;ENSRNOT00000090727	GO:0005515(protein binding);GO:0005634(nucleus);GO:0005635(nuclear envelope);GO:0005654(nucleoplasm);GO:0005737(cytoplasm);GO:0005886(plasma membrane);GO:0005912(adherens junction);GO:0008022(protein C-terminus binding);GO:0009986(cell surface);GO:0016324(apical plasma membrane);GO:0023051(regulation of signaling);GO:0030155(regulation of cell adhesion);GO:0042805(actinin binding);GO:0045944(posi…	04520(Adherens junction);04520(Adherens junction)	K06084	NA	LIM domain 7 [Source:RGD Symbol;Acc:1302984]	protein_coding	1.18157	1.48434	1.53937	0.509347	0.905017	0.634472	2.05252	1.0374	0.0015357	0.0620638	up	yes
ENSRNOG00000007234	Cyp51	ENSRNOT00000009985	GO:0004497(monooxygenase activity);GO:0005506(iron ion binding);GO:0005783(endoplasmic reticulum);GO:0005789(endoplasmic reticulum membrane);GO:0006629(lipid metabolic process);GO:0006694(steroid biosynthetic process);GO:0006695(cholesterol biosynthetic process);GO:0008202(steroid metabolic process);GO:0008203(cholesterol metabolic process);GO:0008398(sterol 14-demethylase activity);GO:0016020(me…	00100(Steroid biosynthesis)	K05917	EC:1.14.14.154	cytochrome P450, family 51 [Source:RGD Symbol;Acc:2481]	protein_coding	26.1838	14.6934	8.16211	58.5907	28.846	28.6189	0.42255	-1.2428	0.00157719	0.0631155	down	yes
ENSRNOG00000011184	Slc13a4	ENSRNOT00000059892	GO:0006811(ion transport);GO:0006814(sodium ion transport);GO:0016020(membrane);GO:0016021(integral component of membrane);GO:0022857(transmembrane transporter activity);GO:0055085(transmembrane transport);GO:0098656(anion transmembrane transport)	NA	K14444	NA	solute carrier family 13 member 4 [Source:RGD Symbol;Acc:1359715]	protein_coding	8.00108	5.94796	4.45477	18.5504	18.2458	5.85184	0.431527	-1.21248	0.00160148	0.0632218	down	yes
ENSRNOG00000032246	Acsm3	ENSRNOT00000020039	GO:0000166(nucleotide binding);GO:0003674(molecular_function);GO:0003824(catalytic activity);GO:0003996(acyl-CoA ligase activity);GO:0004321(fatty-acyl-CoA synthase activity);GO:0005524(ATP binding);GO:0005575(cellular_component);GO:0005739(mitochondrion);GO:0005759(mitochondrial matrix);GO:0006629(lipid metabolic process);GO:0006631(fatty acid metabolic process);GO:0006633(fatty acid biosyntheti…	00650(Butanoate metabolism)	K01896	EC:6.2.1.2	acyl-CoA synthetase medium-chain family member 3 [Source:RGD Symbol;Acc:62086]	protein_coding	23.4969	41.788	64.3288	11.0689	19.1359	29.7758	2.16093	1.11165	0.00161061	0.0632218	up	yes
ENSRNOG00000003209	Pcp4l1	ENSRNOT00000004347;ENSRNOT00000078402	GO:0005515(protein binding);GO:0005515(protein binding)	NA	NA	NA	Purkinje cell protein 4-like 1 [Source:RGD Symbol;Acc:1593809]	protein_coding	6.24486	3.44423	7.05916	1.85954	3.41887	2.46754	2.1622	1.1125	0.00169073	0.065302	up	yes
ENSRNOG00000003244	Ltc4s	ENSRNOT00000004359	GO:0006691(leukotriene metabolic process);GO:0008047(enzyme activator activity);GO:0016021(integral component of membrane)	00590(Arachidonic acid metabolism)	K00807	EC:4.4.1.20	leukotriene C4 synthase [Source:RGD Symbol;Acc:620677]	protein_coding	8.8823	4.45637	2.50683	14.7813	20.8259	8.75191	0.35721	-1.48516	0.00171905	0.0657615	down	yes
ENSRNOG00000013092	Lonrf3	ENSRNOT00000017550;ENSRNOT00000089266	GO:0005515(protein binding);GO:0046872(metal ion binding);GO:0046872(metal ion binding)	NA	NA	NA	LON peptidase N-terminal domain and ring finger 3 [Source:RGD Symbol;Acc:1565451]	protein_coding	0.350377	0.214033	0.262082	1.03149	0.774463	0.423056	0.370789	-1.43133	0.00173033	0.0657904	down	yes
ENSRNOG00000011648	Aqp1	ENSRNOT00000015692;ENSRNOT00000087191	GO:0003094(glomerular filtration);GO:0003097(renal water transport);GO:0005223(intracellular cGMP-activated cation channel activity);GO:0005267(potassium channel activity);GO:0005372(water transmembrane transporter activity);GO:0005515(protein binding);GO:0005634(nucleus);GO:0005737(cytoplasm);GO:0005886(plasma membrane);GO:0005901(caveola);GO:0005903(brush border);GO:0006813(potassium ion transp…	04924(Renin secretion);04964(Proximal tubule bicarbonate reclamation);04976(Bile secretion);04976(Bile secretion)	K09864	NA	aquaporin 1 (Colton blood group) [Source:RGD Symbol;Acc:2141]	protein_coding	1.95132	1.93807	1.98849	1.79408	5.99547	5.32766	0.448105	-1.15809	0.00185293	0.0696378	down	yes
ENSRNOG00000008676	Emp1	ENSRNOT00000011580;ENSRNOT00000079785	GO:0003674(molecular_function);GO:0005886(plasma membrane);GO:0008150(biological_process);GO:0008219(cell death);GO:0016020(membrane);GO:0016021(integral component of membrane);GO:0032060(bleb assembly);GO:0032060(bleb assembly)	NA	NA	NA	epithelial membrane protein 1 [Source:RGD Symbol;Acc:2552]	protein_coding	0.699561	0.580772	0.73153	1.28281	1.42421	1.66174	0.460511	-1.11869	0.00186254	0.0697309	down	yes
ENSRNOG00000004473	Ppargc1a	ENSRNOT00000006071	GO:0000302(response to reactive oxygen species);GO:0000422(autophagy of mitochondrion);GO:0001666(response to hypoxia);GO:0001933(negative regulation of protein phosphorylation);GO:0002021(response to dietary excess);GO:0002931(response to ischemia);GO:0003676(nucleic acid binding);GO:0003677(DNA binding);GO:0003682(chromatin binding);GO:0003712(transcription coregulator activity);GO:0003713(tran…	04152(AMPK signaling pathway);04211(Longevity regulating pathway);04371(Apelin signaling pathway);04714(Thermogenesis);04910(Insulin signaling pathway);04920(Adipocytokine signaling pathway);04922(Glucagon signaling pathway);04931(Insulin resistance);05016(Huntington disease)	K07202	NA	PPARG coactivator 1 alpha [Source:RGD Symbol;Acc:620925]	protein_coding	0.889046	1.14071	1.43938	0.292289	0.271146	0.696215	2.75405	1.46155	0.00202617	0.0747113	up	yes
ENSRNOG00000010078	Spag1	ENSRNOT00000013801	GO:0000166(nucleotide binding);GO:0005515(protein binding);GO:0005525(GTP binding);GO:0005737(cytoplasm);GO:0005829(cytosol);GO:0007338(single fertilization);GO:0016787(hydrolase activity);GO:0070286(axonemal dynein complex assembly)	NA	K19870	NA	sperm associated antigen 1 [Source:RGD Symbol;Acc:1310702]	protein_coding	1.04983	1.27124	1.0154	0.598642	0.377347	0.503847	2.25462	1.17288	0.00208764	0.076157	up	yes
ENSRNOG00000004305	Abl2	ENSRNOT00000059524	GO:0000166(nucleotide binding);GO:0000287(magnesium ion binding);GO:0001784(phosphotyrosine residue binding);GO:0001843(neural tube closure);GO:0001891(phagocytic cup);GO:0002118(aggressive behavior);GO:0003674(molecular_function);GO:0004672(protein kinase activity);GO:0004713(protein tyrosine kinase activity);GO:0004715(non-membrane spanning protein tyrosine kinase activity);GO:0005515(protein b…	04012(ErbB signaling pathway);04014(Ras signaling pathway);05416(Viral myocarditis)	K08887	EC:2.7.10.2	ABL proto-oncogene 2, non-receptor tyrosine kinase [Source:RGD Symbol;Acc:1590898]	protein_coding	0.274921	0.243873	0.114033	0.681387	0.393428	0.846647	0.329347	-1.60232	0.00218162	0.0780941	down	yes
ENSRNOG00000001130	Nos1	ENSRNOT00000066810;ENSRNOT00000001493	GO:0001666(response to hypoxia);GO:0002028(regulation of sodium ion transport);GO:0004517(nitric-oxide synthase activity);GO:0005515(protein binding);GO:0005516(calmodulin binding);GO:0005654(nucleoplasm);GO:0005739(mitochondrion);GO:0005856(cytoskeleton);GO:0005886(plasma membrane);GO:0005901(caveola);GO:0006809(nitric oxide biosynthetic process);GO:0006941(striated muscle contraction);GO:000940…	00220(Arginine biosynthesis);00330(Arginine and proline metabolism);04020(Calcium signaling pathway);04145(Phagosome);04371(Apelin signaling pathway);04713(Circadian entrainment);04730(Long-term depression);04926(Relaxin signaling pathway);04970(Salivary secretion);05010(Alzheimer disease);05014(Amyotrophic lateral sclerosis (ALS));05014(Amyotrophic lateral sclerosis (ALS))	NA	NA	nitric oxide synthase 1 [Source:RGD Symbol;Acc:3184]	protein_coding	0.060285	0.033823	0.090089	0.214737	0.217377	0.148962	0.316993	-1.65748	0.00221394	0.0783222	down	yes
ENSRNOG00000032472	Adgrg2	ENSRNOT00000040770;ENSRNOT00000058833;ENSRNOT00000058834	GO:0004888(transmembrane signaling receptor activity);GO:0004930(G protein-coupled receptor activity);GO:0005829(cytosol);GO:0005886(plasma membrane);GO:0005887(integral component of plasma membrane);GO:0007165(signal transduction);GO:0007166(cell surface receptor signaling pathway);GO:0007186(G protein-coupled receptor signaling pathway);GO:0007189(adenylate cyclase-activating G protein-coupled …	NA	K08451	NA	adhesion G protein-coupled receptor G2 [Source:RGD Symbol;Acc:628618]	protein_coding	0.057899	0.0001	0.010135	0.217102	0.037097	0.270488	0.129856	-2.94501	0.00225989	0.0797168	down	yes
ENSRNOG00000007012	Ly75	ENSRNOT00000010683	GO:0006897(endocytosis);GO:0009897(external side of plasma membrane);GO:0016020(membrane);GO:0016021(integral component of membrane);GO:0030246(carbohydrate binding);GO:0038023(signaling receptor activity)	NA	K06559	NA	lymphocyte antigen 75 [Source:RGD Symbol;Acc:1565962]	protein_coding	0.351043	0.226034	0.471769	0.065831	0.161662	0.126371	2.96398	1.56754	0.00236356	0.0827178	up	yes
ENSRNOG00000009708	Tas1r1	ENSRNOT00000013385	GO:0004930(G protein-coupled receptor activity);GO:0005886(plasma membrane);GO:0005887(integral component of plasma membrane);GO:0007165(signal transduction);GO:0007186(G protein-coupled receptor signaling pathway);GO:0008527(taste receptor activity);GO:0016020(membrane);GO:0016021(integral component of membrane);GO:0038023(signaling receptor activity);GO:0050896(response to stimulus);GO:0050909(…	04742(Taste transduction)	NA	NA	taste 1 receptor member 1 [Source:RGD Symbol;Acc:61891]	protein_coding	1.84225	2.50688	1.68322	0.735959	1.22943	0.904317	2.10208	1.07182	0.00236849	0.0827178	up	yes
ENSRNOG00000013376	Mvd	ENSRNOT00000018145	GO:0004163(diphosphomevalonate decarboxylase activity);GO:0005524(ATP binding);GO:0005829(cytosol);GO:0008299(isoprenoid biosynthetic process);GO:0016831(carboxy-lyase activity);GO:0019287(isopentenyl diphosphate biosynthetic process, mevalonate pathway)	00900(Terpenoid backbone biosynthesis)	K01597	EC:4.1.1.33	mevalonate diphosphate decarboxylase [Source:RGD Symbol;Acc:621292]	protein_coding	1.60079	0.935731	1	4.45652	2.05417	2.17535	0.40715	-1.29637	0.00248701	0.0857458	down	yes
ENSRNOG00000025365	Ido2	ENSRNOT00000032116	GO:0019441(tryptophan catabolic process to kynurenine);GO:0020037(heme binding);GO:0033754(indoleamine 2,3-dioxygenase activity);GO:0046872(metal ion binding);GO:0055114(oxidation-reduction process)	00380(Tryptophan metabolism);05143(African trypanosomiasis)	K00463	EC:1.13.11.52	indoleamine 2,3-dioxygenase 2 [Source:RGD Symbol;Acc:1596771]	protein_coding	5.13264	9.11049	5.97729	3.87777	3.52999	2.45783	2.04959	1.03533	0.00251114	0.0863338	up	yes
ENSRNOG00000003703	Mcm6	ENSRNOT00000004969	GO:0000166(nucleotide binding);GO:0003677(DNA binding);GO:0003678(DNA helicase activity);GO:0003697(single-stranded DNA binding);GO:0004386(helicase activity);GO:0005524(ATP binding);GO:0005634(nucleus);GO:0005654(nucleoplasm);GO:0006260(DNA replication);GO:0006268(DNA unwinding involved in DNA replication);GO:0006270(DNA replication initiation);GO:0007049(cell cycle);GO:0016787(hydrolase activit…	03030(DNA replication);04110(Cell cycle)	NA	NA	minichromosome maintenance complex component 6 [Source:RGD Symbol;Acc:61967]	protein_coding	0.376421	0.336976	0.233013	0.586793	0.916428	0.989548	0.379662	-1.39721	0.00252302	0.0864886	down	yes
ENSRNOG00000004679	Fign	ENSRNOT00000006175	GO:0005524(ATP binding);GO:0005634(nucleus);GO:0008022(protein C-terminus binding);GO:0008568(microtubule-severing ATPase activity);GO:0010569(regulation of double-strand break repair via homologous recombination);GO:0016363(nuclear matrix);GO:0016887(ATPase activity);GO:0031122(cytoplasmic microtubule organization);GO:0051013(microtubule severing)	NA	NA	NA	fidgetin, microtubule severing factor [Source:RGD Symbol;Acc:1308174]	protein_coding	1.73867	1.12241	1.53015	0.716011	0.725006	0.241951	2.60922	1.38362	0.00252982	0.0864886	up	yes
ENSRNOG00000034203	AABR07064312	ENSRNOT00000047882	GO:0000028(ribosomal small subunit assembly);GO:0003723(RNA binding);GO:0003735(structural constituent of ribosome);GO:0005840(ribosome);GO:0006412(translation);GO:0022627(cytosolic small ribosomal subunit)	NA	NA	NA		protein_coding	6.88155	5.26097	5.17755	0.497579	2.26095	2.64175	3.20725	1.68134	0.00260941	0.088221	up	yes
ENSRNOG00000057099	AABR07006097	ENSRNOT00000086155	NA	NA	NA	NA		lincRNA	0.267966	0.330013	0.290993	0.082069	0.101416	0.113113	2.99723	1.58363	0.00262906	0.0886401	up	yes
ENSRNOG00000010625	Dnmt3b	ENSRNOT00000090321;ENSRNOT00000015482	GO:0000122(negative regulation of transcription by RNA polymerase II);GO:0000775(chromosome, centromeric region);GO:0000792(heterochromatin);GO:0001666(response to hypoxia);GO:0003677(DNA binding);GO:0003682(chromatin binding);GO:0003714(transcription corepressor activity);GO:0003886(DNA (cytosine-5-)-methyltransferase activity);GO:0005515(protein binding);GO:0005634(nucleus);GO:0005654(nucleopla…	00270(Cysteine and methionine metabolism);05206(MicroRNAs in cancer);05206(MicroRNAs in cancer)	K17399	EC:2.1.1.37	DNA methyltransferase 3 beta [Source:RGD Symbol;Acc:1303274]	protein_coding	0.644895	0.565041	0.428505	1.43632	2.09276	0.666773	0.39049	-1.35664	0.00266076	0.0889716	down	yes
ENSRNOG00000021657	Pld6	ENSRNOT00000033483	GO:0003674(molecular_function);GO:0003824(catalytic activity);GO:0005575(cellular_component);GO:0005741(mitochondrial outer membrane);GO:0007286(spermatid development);GO:0008053(mitochondrial fusion);GO:0008150(biological_process);GO:0010636(positive regulation of mitochondrial fusion);GO:0016042(lipid catabolic process);GO:0030719(P granule organization);GO:0034587(piRNA metabolic process);GO:0…	NA	K16862	EC:3.1.4.-	phospholipase D family, member 6 [Source:RGD Symbol;Acc:1311987]	protein_coding	1.34307	1.65924	1.71777	0.470367	0.398031	0.762534	2.8941	1.53311	0.00274173	0.0909315	up	yes
ENSRNOG00000050243	Akr1c12l1	ENSRNOT00000064884	GO:0004032(alditol:NADP+ 1-oxidoreductase activity);GO:0005829(cytosol);GO:0008106(alcohol dehydrogenase (NADP+) activity);GO:0008202(steroid metabolic process);GO:0016229(steroid dehydrogenase activity);GO:0016491(oxidoreductase activity);GO:0047086(ketosteroid monooxygenase activity);GO:0055114(oxidation-reduction process)	NA	NA	NA	aldo-keto reductase family 1, member C12-like 1 [Source:RGD Symbol;Acc:1559604]	protein_coding	0.478408	0.253495	0.352629	0.953075	1.44016	0.872156	0.332129	-1.59018	0.00280587	0.0921771	down	yes
ENSRNOG00000051483	LOC103689961	ENSRNOT00000080422;ENSRNOT00000078917	NA	NA	NA	NA	selenoprotein W-like [Source:RGD Symbol;Acc:9418506]	protein_coding	2.02797	2.64405	4.11096	3.55252	9.00677	9.08401	0.405806	-1.30114	0.00284547	0.0928583	down	yes
ENSRNOG00000030904	Cpb1	ENSRNOT00000043381	GO:0004180(carboxypeptidase activity);GO:0004181(metallocarboxypeptidase activity);GO:0006508(proteolysis);GO:0008233(peptidase activity);GO:0008237(metallopeptidase activity);GO:0008270(zinc ion binding);GO:0016787(hydrolase activity);GO:0046872(metal ion binding)	04972(Pancreatic secretion);04974(Protein digestion and absorption)	K01291	EC:3.4.17.2	carboxypeptidase B1 [Source:RGD Symbol;Acc:2391]	protein_coding	0.229789	0.070134	0.182942	0.13153	1.25433	0.986546	0.203534	-2.29666	0.0032041	0.102104	down	yes
ENSRNOG00000015222	Tent5c	ENSRNOT00000020401	GO:0001701(in utero embryonic development);GO:0003723(RNA binding);GO:0004652(polynucleotide adenylyltransferase activity);GO:0005634(nucleus);GO:0005737(cytoplasm);GO:0016740(transferase activity);GO:0016779(nucleotidyltransferase activity);GO:0048255(mRNA stabilization);GO:1990817(RNA adenylyltransferase activity)	NA	K23034	EC:2.7.7.19	terminal nucleotidyltransferase 5C [Source:RGD Symbol;Acc:1359446]	protein_coding	5.7348	4.46414	3.97884	1.71136	3.51555	1.74773	2.03276	1.02344	0.00336059	0.105984	up	yes
ENSRNOG00000046529	LOC500473	ENSRNOT00000075994	GO:0005550(pheromone binding);GO:0005576(extracellular region);GO:0036094(small molecule binding)	NA	NA	NA	similar to alpha-2u globulin PGCL2 [Source:RGD Symbol;Acc:1583727]	protein_coding	465.16	501.361	159.57	544.065	732.502	1191.14	0.456331	-1.13185	0.00342789	0.10749	down	yes
ENSRNOG00000021526	Slc25a34	ENSRNOT00000022820	GO:0001835(blastocyst hatching);GO:0016020(membrane);GO:0016021(integral component of membrane)	NA	K15117	NA	solute carrier family 25, member 34 [Source:RGD Symbol;Acc:1359157]	protein_coding	0.637478	0.846066	2.04357	0.339476	0.317607	0.451059	3.18291	1.67034	0.00353249	0.109705	up	yes
ENSRNOG00000001414	Serpine1	ENSRNOT00000001916	GO:0001300(chronological cell aging);GO:0001525(angiogenesis);GO:0002020(protease binding);GO:0004867(serine-type endopeptidase inhibitor activity);GO:0005102(signaling receptor binding);GO:0005576(extracellular region);GO:0005615(extracellular space);GO:0010469(regulation of signaling receptor activity);GO:0010757(negative regulation of plasminogen activation);GO:0010951(negative regulation of e…	04066(HIF-1 signaling pathway);04115(p53 signaling pathway);04218(Cellular senescence);04371(Apelin signaling pathway);04390(Hippo signaling pathway);04610(Complement and coagulation cascades);04933(AGE-RAGE signaling pathway in diabetic complications);05142(Chagas disease (American trypanosomiasis))	NA	NA	serpin family E member 1 [Source:RGD Symbol;Acc:3249]	protein_coding	0.53332	0.84092	0.786571	0.305417	0.285574	0.286487	2.46252	1.30014	0.00365225	0.112281	up	yes
ENSRNOG00000015562	Cdh17	ENSRNOT00000021612	GO:0002314(germinal center B cell differentiation);GO:0002315(marginal zone B cell differentiation);GO:0005178(integrin binding);GO:0005427(proton-dependent oligopeptide secondary active transmembrane transporter activity);GO:0005509(calcium ion binding);GO:0005654(nucleoplasm);GO:0005886(plasma membrane);GO:0006857(oligopeptide transport);GO:0007155(cell adhesion);GO:0007156(homophilic cell adhe…	05226(Gastric cancer)	K06811	NA	cadherin 17 [Source:RGD Symbol;Acc:619748]	protein_coding	0.599146	0.499303	0.921185	2.70647	0.640167	1.8602	0.387881	-1.36632	0.00367617	0.112733	down	yes
ENSRNOG00000025764	AC128848	ENSRNOT00000038212	GO:0005634(nucleus);GO:0005737(cytoplasm);GO:0006882(cellular zinc ion homeostasis);GO:0010273(detoxification of copper ion);GO:0046872(metal ion binding);GO:0071276(cellular response to cadmium ion);GO:0071280(cellular response to copper ion);GO:0071294(cellular response to zinc ion)	NA	NA	NA		protein_coding	166.398	297.169	506.078	33.3085	212.04	111.466	2.7175	1.44228	0.00371755	0.113291	up	yes
ENSRNOG00000024650	Ckap2	ENSRNOT00000029266	GO:0000281(mitotic cytokinesis);GO:0005737(cytoplasm);GO:0005813(centrosome);GO:0005829(cytosol);GO:0005881(cytoplasmic microtubule);GO:0007026(negative regulation of microtubule depolymerization);GO:0015630(microtubule cytoskeleton);GO:0045944(positive regulation of transcription by RNA polymerase II)	NA	K16769	NA	cytoskeleton associated protein 2 [Source:RGD Symbol;Acc:1311631]	protein_coding	0.201778	0.135215	0.028966	0.430781	0.295108	0.738513	0.249903	-2.00056	0.00380375	0.115198	down	yes
ENSRNOG00000001242	Gstt3	ENSRNOT00000036518	GO:0004364(glutathione transferase activity);GO:0005515(protein binding);GO:0005737(cytoplasm);GO:0006749(glutathione metabolic process);GO:0016740(transferase activity)	NA	NA	NA	glutathione S-transferase, theta 3 [Source:RGD Symbol;Acc:1562732]	protein_coding	11.3598	18.4477	16.7558	64.9735	5.20009	91.0163	0.288872	-1.7915	0.00386613	0.116797	down	yes
ENSRNOG00000037060	Odf3b	ENSRNOT00000055805	GO:0005856(cytoskeleton)	NA	NA	NA	outer dense fiber of sperm tails 3B [Source:RGD Symbol;Acc:1564322]	protein_coding	1.68869	0.850822	1.29174	2.14735	4.50496	3.03847	0.39535	-1.3388	0.00428277	0.12535	down	yes
ENSRNOG00000005708	Mmp16	ENSRNOT00000050137	GO:0001503(ossification);GO:0001958(endochondral ossification);GO:0004222(metalloendopeptidase activity);GO:0005887(integral component of plasma membrane);GO:0006508(proteolysis);GO:0008233(peptidase activity);GO:0008237(metallopeptidase activity);GO:0008270(zinc ion binding);GO:0016485(protein processing);GO:0016787(hydrolase activity);GO:0030574(collagen catabolic process);GO:0031012(extracellu…	04928(Parathyroid hormone synthesis, secretion and action);05206(MicroRNAs in cancer)	K07996	EC:3.4.24.-	matrix metallopeptidase 16 [Source:RGD Symbol;Acc:620199]	protein_coding	0.167775	0.368387	0.116704	0.516369	0.793877	0.574064	0.346475	-1.52918	0.00430768	0.125778	down	yes
ENSRNOG00000016420	Serpinb6b	ENSRNOT00000059921	GO:0004867(serine-type endopeptidase inhibitor activity);GO:0005615(extracellular space);GO:0005634(nucleus);GO:0005737(cytoplasm);GO:0010951(negative regulation of endopeptidase activity)	05146(Amoebiasis)	K13963	NA	serine (or cysteine) peptidase inhibitor, clade B, member 6b [Source:RGD Symbol;Acc:1310452]	protein_coding	1.19262	1.2875	0.87352	1.68188	2.81314	3.74333	0.407076	-1.29663	0.00446785	0.129834	down	yes
ENSRNOG00000001711	Plaat1	ENSRNOT00000002329	GO:0004620(phospholipase activity);GO:0004623(phospholipase A2 activity);GO:0005634(nucleus);GO:0005641(nuclear envelope lumen);GO:0005737(cytoplasm);GO:0005777(peroxisome);GO:0006629(lipid metabolic process);GO:0007031(peroxisome organization);GO:0008374(O-acyltransferase activity);GO:0008970(phospholipase A1 activity);GO:0016020(membrane);GO:0016021(integral component of membrane);GO:0016042(li…	NA	NA	NA	phospholipase A and acyltransferase 1 [Source:RGD Symbol;Acc:1309485]	protein_coding	3.84817	3.87178	2.06762	0.055268	0.0001	1.09643	8.49767	3.08707	0.00463269	0.132817	up	yes
ENSRNOG00000011161	Slc2a12	ENSRNOT00000015566	GO:0008643(carbohydrate transport);GO:0016020(membrane);GO:0016021(integral component of membrane);GO:0022857(transmembrane transporter activity);GO:0055085(transmembrane transport);GO:1904659(glucose transmembrane transport)	NA	K08149	NA	solute carrier family 2 member 12 [Source:RGD Symbol;Acc:1310175]	protein_coding	0.099695	0.068483	0.082782	0.044677	0.576698	0.464862	0.231036	-2.11381	0.00465764	0.132817	down	yes
ENSRNOG00000054325	AABR07004397	ENSRNOT00000077093	NA	NA	NA	NA		lincRNA	4.35939	2.8621	1.6156	8.22232	1.97354	23.3626	0.263335	-1.92503	0.00470914	0.133287	down	yes
ENSRNOG00000016957	Igfbp2	ENSRNOT00000023068	GO:0005520(insulin-like growth factor binding);GO:0005576(extracellular region);GO:0005615(extracellular space);GO:0007165(signal transduction);GO:0007275(multicellular organism development);GO:0007565(female pregnancy);GO:0007568(aging);GO:0007584(response to nutrient);GO:0009612(response to mechanical stimulus);GO:0010226(response to lithium ion);GO:0016324(apical plasma membrane);GO:0019838(gr…	NA	NA	NA	insulin-like growth factor binding protein 2 [Source:RGD Symbol;Acc:2873]	protein_coding	14.4514	54.6795	56.3092	1.95057	8.46722	26.1319	3.43204	1.77907	0.00494065	0.138304	up	yes
ENSRNOG00000014678	Fzd5	ENSRNOT00000019698	GO:0000578(embryonic axis specification);GO:0001525(angiogenesis);GO:0001540(amyloid-beta binding);GO:0001944(vasculature development);GO:0002726(positive regulation of T cell cytokine production);GO:0004888(transmembrane signaling receptor activity);GO:0005515(protein binding);GO:0005769(early endosome);GO:0005794(Golgi apparatus);GO:0005886(plasma membrane);GO:0005887(integral component of plas…	04150(mTOR signaling pathway);04310(Wnt signaling pathway);04390(Hippo signaling pathway);04550(Signaling pathways regulating pluripotency of stem cells);04916(Melanogenesis);04934(Cushing syndrome);05165(Human papillomavirus infection);05200(Pathways in cancer);05205(Proteoglycans in cancer);05217(Basal cell carcinoma);05224(Breast cancer);05225(Hepatocellular carcinoma);05226(Gastric cancer)	K02375	NA	frizzled class receptor 5 [Source:RGD Symbol;Acc:631406]	protein_coding	2.06036	1.45443	2.71193	0.700766	0.770483	1.39882	2.16954	1.11739	0.00499068	0.13875	up	yes
ENSRNOG00000020309	Gfra3	ENSRNOT00000027544	GO:0001764(neuron migration);GO:0005829(cytosol);GO:0005886(plasma membrane);GO:0007399(nervous system development);GO:0007411(axon guidance);GO:0008046(axon guidance receptor activity);GO:0009897(external side of plasma membrane);GO:0016020(membrane);GO:0016167(glial cell-derived neurotrophic factor receptor activity);GO:0035860(glial cell-derived neurotrophic factor receptor signaling pathway);…	NA	NA	NA	GDNF family receptor alpha 3 [Source:RGD Symbol;Acc:620502]	protein_coding	2.06625	2.71833	4.57825	1.01685	2.12416	1.15872	2.17754	1.1227	0.00516388	0.14163	up	yes
ENSRNOG00000020465	Ripk3	ENSRNOT00000027759	GO:0000166(nucleotide binding);GO:0001914(regulation of T cell mediated cytotoxicity);GO:0002819(regulation of adaptive immune response);GO:0004672(protein kinase activity);GO:0004674(protein serine/threonine kinase activity);GO:0004704(NF-kappaB-inducing kinase activity);GO:0005524(ATP binding);GO:0005634(nucleus);GO:0005737(cytoplasm);GO:0005829(cytosol);GO:0006468(protein phosphorylation);GO:0…	04217(Necroptosis);04621(NOD-like receptor signaling pathway);04623(Cytosolic DNA-sensing pathway);04668(TNF signaling pathway)	K08847	EC:2.7.11.1	receptor-interacting serine-threonine kinase 3 [Source:RGD Symbol;Acc:628899]	protein_coding	0.871055	0.67757	0.695779	0.910799	2.5027	1.93878	0.419336	-1.25382	0.00533108	0.145236	down	yes
ENSRNOG00000028116	LOC102552988	ENSRNOT00000038955	GO:0016020(membrane);GO:0016021(integral component of membrane)	NA	NA	NA	uncharacterized LOC102552988 [Source:RGD Symbol;Acc:7517962]	protein_coding	3.13089	2.50088	2.75055	1.85202	0.800637	0.692097	2.50611	1.32545	0.00543	0.147274	up	yes
ENSRNOG00000007805	Mybl2	ENSRNOT00000010343	GO:0000278(mitotic cell cycle);GO:0000976(transcription regulatory region sequence-specific DNA binding);GO:0000978(RNA polymerase II cis-regulatory region sequence-specific DNA binding);GO:0001228(DNA-binding transcription activator activity, RNA polymerase II-specific);GO:0003677(DNA binding);GO:0003700(DNA-binding transcription factor activity);GO:0003712(transcription coregulator activity);GO…	04218(Cellular senescence)	K21769	NA	MYB proto-oncogene like 2 [Source:RGD Symbol;Acc:1308474]	protein_coding	0.312169	0.17083	0.300872	0.026828	0.147232	0.020811	4.02251	2.0081	0.00547835	0.147927	up	yes
ENSRNOG00000020903	Lto1	ENSRNOT00000028374	GO:0000723(telomere maintenance);GO:0003674(molecular_function);GO:0005575(cellular_component);GO:0006413(translational initiation);GO:0008150(biological_process);GO:0042273(ribosomal large subunit biogenesis);GO:0106035(protein maturation by [4Fe-4S] cluster transfer)	NA	NA	NA	LTO1 maturation factor of ABCE1 [Source:RGD Symbol;Acc:1304637]	protein_coding	1.31042	1.69858	1.50055	3.31181	3.128	3.83839	0.43875	-1.18853	0.00578669	0.153203	down	yes
ENSRNOG00000053047	Top2a	ENSRNOT00000085344;ENSRNOT00000081440	GO:0000166(nucleotide binding);GO:0000228(nuclear chromosome);GO:0000287(magnesium ion binding);GO:0000775(chromosome, centromeric region);GO:0000793(condensed chromosome);GO:0002244(hematopoietic progenitor cell differentiation);GO:0003677(DNA binding);GO:0003682(chromatin binding);GO:0003916(DNA topoisomerase activity);GO:0003918(DNA topoisomerase type II (double strand cut, ATP-hydrolyzing) ac…	01524(Platinum drug resistance);01524(Platinum drug resistance)	K03164	EC:5.6.2.2	DNA topoisomerase II alpha [Source:RGD Symbol;Acc:62048]	protein_coding	0.019395	0.157647	0.0001	0.186359	0.554064	0.443081	0.149676	-2.74009	0.00581809	0.153701	down	yes
ENSRNOG00000006334	Txndc16	ENSRNOT00000008372	GO:0005788(endoplasmic reticulum lumen);GO:0045454(cell redox homeostasis)	NA	NA	NA	thioredoxin domain containing 16 [Source:RGD Symbol;Acc:1306755]	protein_coding	1.58065	1.37415	1.85468	0.726881	0.915772	0.737759	2.02044	1.01467	0.00590876	0.154917	up	yes
ENSRNOG00000025476	Tmem252	ENSRNOT00000035123	GO:0016020(membrane);GO:0016021(integral component of membrane)	NA	NA	NA	transmembrane protein 252 [Source:RGD Symbol;Acc:1359349]	protein_coding	0.603156	0.338704	0.632733	1.73579	0.907612	1.18649	0.411132	-1.28233	0.00594806	0.155327	down	yes
ENSRNOG00000004437	Map2k6	ENSRNOT00000006217	GO:0000165(MAPK cascade);GO:0000166(nucleotide binding);GO:0000187(activation of MAPK activity);GO:0001934(positive regulation of protein phosphorylation);GO:0002931(response to ischemia);GO:0004672(protein kinase activity);GO:0004674(protein serine/threonine kinase activity);GO:0004708(MAP kinase kinase activity);GO:0005524(ATP binding);GO:0005575(cellular_component);GO:0005654(nucleoplasm);GO:0…	04010(MAPK signaling pathway);04015(Rap1 signaling pathway);04218(Cellular senescence);04380(Osteoclast differentiation);04620(Toll-like receptor signaling pathway);04664(Fc epsilon RI signaling pathway);04668(TNF signaling pathway);04750(Inflammatory mediator regulation of TRP channels);04912(GnRH signaling pathway);05014(Amyotrophic lateral sclerosis (ALS));05145(Toxoplasmosis);05161(Hepatitis …	K04433	EC:2.7.12.2	mitogen-activated protein kinase kinase 6 [Source:RGD Symbol;Acc:620666]	protein_coding	0.960969	1.98015	1.54646	0.836116	0.451652	0.599669	2.3776	1.24951	0.00604129	0.156881	up	yes
ENSRNOG00000003895	Rgs1	ENSRNOT00000005251	GO:0001965(G-protein alpha-subunit binding);GO:0005096(GTPase activator activity);GO:0005737(cytoplasm);GO:0005829(cytosol);GO:0005886(plasma membrane);GO:0007165(signal transduction);GO:0007186(G protein-coupled receptor signaling pathway);GO:0008277(regulation of G protein-coupled receptor signaling pathway);GO:0009617(response to bacterium);GO:0009968(negative regulation of signal transduction…	NA	K16449	NA	regulator of G-protein signaling 1 [Source:RGD Symbol;Acc:3561]	protein_coding	0.876551	1.35663	0.509083	0.23434	0.447277	0.203033	3.09982	1.63219	0.00609425	0.157252	up	yes
ENSRNOG00000016690	Idi1	ENSRNOT00000022389	GO:0004452(isopentenyl-diphosphate delta-isomerase activity);GO:0005777(peroxisome);GO:0006694(steroid biosynthetic process);GO:0006695(cholesterol biosynthetic process);GO:0008202(steroid metabolic process);GO:0008203(cholesterol metabolic process);GO:0008299(isoprenoid biosynthetic process);GO:0016126(sterol biosynthetic process);GO:0016787(hydrolase activity);GO:0016853(isomerase activity);GO:…	00900(Terpenoid backbone biosynthesis)	K01823	EC:5.3.3.2	isopentenyl-diphosphate delta isomerase 1 [Source:RGD Symbol;Acc:621835]	protein_coding	5.63115	2.11582	1.28854	10.0357	5.67888	5.27319	0.430512	-1.21587	0.0067378	0.17204	down	yes
ENSRNOG00000001198	Fam222a	ENSRNOT00000001588	NA	NA	NA	NA	family with sequence similarity 222, member A [Source:RGD Symbol;Acc:1565883]	protein_coding	0.375919	0.320576	0.321832	0.46702	0.930596	1.34332	0.371526	-1.42847	0.00691343	0.175423	down	yes
ENSRNOG00000012980	Hyls1	ENSRNOT00000017330	GO:0005634(nucleus);GO:0005737(cytoplasm);GO:0005813(centrosome);GO:0005814(centriole);GO:0005829(cytosol);GO:0005856(cytoskeleton);GO:0005886(plasma membrane);GO:0005929(cilium);GO:0030030(cell projection organization);GO:0042995(cell projection);GO:0060271(cilium assembly);GO:0097730(non-motile cilium)	NA	NA	NA	HYLS1, centriolar and ciliogenesis associated [Source:RGD Symbol;Acc:1594169]	protein_coding	1.91854	1.58132	2.60343	6.29731	3.95836	2.91158	0.46352	-1.1093	0.00700659	0.17705	down	yes
ENSRNOG00000012580	Ccdc141	ENSRNOT00000037015	GO:0005515(protein binding);GO:0005737(cytoplasm);GO:0005813(centrosome);GO:0016020(membrane);GO:0016021(integral component of membrane);GO:0021799(cerebral cortex radially oriented cell migration);GO:0043005(neuron projection);GO:0051642(centrosome localization)	NA	NA	NA	coiled-coil domain containing 141 [Source:RGD Symbol;Acc:1593250]	protein_coding	0.191655	0.11725	0.160083	0.544715	0.251476	0.322714	0.419149	-1.25446	0.00710019	0.179045	down	yes
ENSRNOG00000016758	Loxl2	ENSRNOT00000085237;ENSRNOT00000058663	GO:0000122(negative regulation of transcription by RNA polymerase II);GO:0000785(chromatin);GO:0001666(response to hypoxia);GO:0001837(epithelial to mesenchymal transition);GO:0001935(endothelial cell proliferation);GO:0002040(sprouting angiogenesis);GO:0004720(protein-lysine 6-oxidase activity);GO:0005044(scavenger receptor activity);GO:0005507(copper ion binding);GO:0005509(calcium ion binding)…	NA	K00280	EC:1.4.3.-	lysyl oxidase-like 2 [Source:RGD Symbol;Acc:1308435]	protein_coding	1.36309	0.98844	0.751734	1.70262	1.78441	2.93335	0.483346	-1.04887	0.00714359	0.179272	down	yes
ENSRNOG00000054467	LOC100910854	ENSRNOT00000083218	NA	NA	NA	NA	zinc finger MYND domain-containing protein 19-like [Source:RGD Symbol;Acc:6496333]	lincRNA	0.598365	0.029843	0.523302	0.113329	0.050524	0.086512	4.59932	2.20142	0.00813523	0.197397	up	yes
ENSRNOG00000033654	LOC501038	ENSRNOT00000045455	NA	NA	NA	NA	Ab2-060 [Source:RGD Symbol;Acc:1560610]	protein_coding	5.90971	2.08186	4.64464	10.5909	8.67079	9.45636	0.44001	-1.18439	0.00825294	0.199066	down	yes
ENSRNOG00000009899	Skil	ENSRNOT00000013191	GO:0000122(negative regulation of transcription by RNA polymerase II);GO:0000978(RNA polymerase II cis-regulatory region sequence-specific DNA binding);GO:0001227(DNA-binding transcription repressor activity, RNA polymerase II-specific);GO:0001669(acrosomal vesicle);GO:0001825(blastocyst formation);GO:0002260(lymphocyte homeostasis);GO:0003674(molecular_function);GO:0003682(chromatin binding);GO:…	04550(Signaling pathways regulating pluripotency of stem cells)	K18499	NA	SKI-like proto-oncogene [Source:RGD Symbol;Acc:621399]	protein_coding	0.673535	0.310986	0.235445	0.951012	0.89762	1.2254	0.396862	-1.33329	0.00837858	0.200905	down	yes
ENSRNOG00000045686	Nfs1	ENSRNOT00000072945	GO:0003824(catalytic activity);GO:0030170(pyridoxal phosphate binding);GO:0031071(cysteine desulfurase activity);GO:0044571([2Fe-2S] cluster assembly);GO:0046872(metal ion binding);GO:0051536(iron-sulfur cluster binding)	00730(Thiamine metabolism);04122(Sulfur relay system)	K04487	EC:2.8.1.7	NFS1 cysteine desulfurase [Source:RGD Symbol;Acc:620912]	protein_coding	0.03392	5.53737	0.0001	11.0259	33.4083	35.6171	0.0695978	-3.84482	0.00871241	0.206594	down	yes
ENSRNOG00000049893	LOC100910934	ENSRNOT00000071612	GO:0003924(GTPase activity);GO:0005525(GTP binding);GO:0005789(endoplasmic reticulum membrane);GO:0006952(defense response);GO:0016020(membrane);GO:0035458(cellular response to interferon-beta)	NA	NA	NA	interferon-inducible GTPase 1-like [Source:RGD Symbol;Acc:6495949]	protein_coding	1.46804	1.42756	5.40009	1.02771	13.7881	14.7045	0.281016	-1.83128	0.00910378	0.213266	down	yes
ENSRNOG00000017445	Tubb2b	ENSRNOT00000083705;ENSRNOT00000023582	GO:0000166(nucleotide binding);GO:0000226(microtubule cytoskeleton organization);GO:0000278(mitotic cell cycle);GO:0001764(neuron migration);GO:0003674(molecular_function);GO:0003924(GTPase activity);GO:0005200(structural constituent of cytoskeleton);GO:0005525(GTP binding);GO:0005575(cellular_component);GO:0005737(cytoplasm);GO:0005856(cytoskeleton);GO:0005874(microtubule);GO:0007017(microtubule…	04145(Phagosome);04540(Gap junction);04540(Gap junction)	K07375	NA	tubulin, beta 2B class IIb [Source:RGD Symbol;Acc:1309427]	protein_coding	2.04254	1.81044	0.966977	2.284	3.55201	3.82896	0.498703	-1.00375	0.00916186	0.214215	down	yes
ENSRNOG00000056894	St6galnac3	ENSRNOT00000091407;ENSRNOT00000082253	GO:0005654(nucleoplasm);GO:0005794(Golgi apparatus);GO:0006486(protein glycosylation);GO:0006677(glycosylceramide metabolic process);GO:0006687(glycosphingolipid metabolic process);GO:0008373(sialyltransferase activity);GO:0009100(glycoprotein metabolic process);GO:0016020(membrane);GO:0016021(integral component of membrane);GO:0016740(transferase activity);GO:0016757(transferase activity, transf…	00604(Glycosphingolipid biosynthesis - ganglio series);00604(Glycosphingolipid biosynthesis - ganglio series)	NA	NA	ST6 N-acetylgalactosaminide alpha-2,6-sialyltransferase 3 [Source:RGD Symbol;Acc:3677]	protein_coding	0.336203	0.274222	0.184463	0.535999	0.634835	0.678794	0.429755	-1.21841	0.00974102	0.224743	down	yes
ENSRNOG00000019189	Acat2	ENSRNOT00000033408;ENSRNOT00000077707	GO:0003824(catalytic activity);GO:0016740(transferase activity);GO:0016746(transferase activity, transferring acyl groups);GO:0016747(transferase activity, transferring acyl groups other than amino-acyl groups);GO:0016747(transferase activity, transferring acyl groups other than amino-acyl groups)	00071(Fatty acid degradation);00072(Synthesis and degradation of ketone bodies);00280(Valine, leucine and isoleucine degradation);00310(Lysine degradation);00380(Tryptophan metabolism);00620(Pyruvate metabolism);00630(Glyoxylate and dicarboxylate metabolism);00640(Propanoate metabolism);00650(Butanoate metabolism);00900(Terpenoid backbone biosynthesis);04975(Fat digestion and absorption);04975(Fa…	K00626	EC:2.3.1.9	acetyl-CoA acetyltransferase 2 [Source:RGD Symbol;Acc:1359366]	protein_coding	1.58772	1.00189	0.57474	3.18841	2.08938	1.72842	0.45165	-1.14672	0.0100176	0.228959	down	yes
ENSRNOG00000055020	AABR07038948	ENSRNOT00000092230	NA	NA	NA	NA		processed_pseudogene	2.85871	2.044	8.56064	9.24938	6.92519	13.6998	0.450665	-1.14987	0.0101117	0.230249	down	yes
ENSRNOG00000013003	Srms	ENSRNOT00000017668	GO:0000166(nucleotide binding);GO:0004672(protein kinase activity);GO:0004713(protein tyrosine kinase activity);GO:0004715(non-membrane spanning protein tyrosine kinase activity);GO:0005102(signaling receptor binding);GO:0005515(protein binding);GO:0005524(ATP binding);GO:0005737(cytoplasm);GO:0006468(protein phosphorylation);GO:0007169(transmembrane receptor protein tyrosine kinase signaling pat…	NA	K08895	EC:2.7.10.2	src-related kinase lacking C-terminal regulatory tyrosine and N-terminal myristylation sites [Source:RGD Symbol;Acc:1306602]	protein_coding	0.272945	0.0001	0.165479	0.889628	0.487257	0.59306	0.222607	-2.16743	0.010164	0.230579	down	yes
ENSRNOG00000061749	7SK	ENSRNOT00000084159	NA	NA	NA	NA	7SK RNA [Source:RFAM;Acc:RF00100]	misc_RNA	1.24356	2.66165	2.0212	3.68966	5.59226	5.41958	0.403116	-1.31073	0.0112399	0.248511	down	yes
ENSRNOG00000033609	Irx1	ENSRNOT00000044690	GO:0000122(negative regulation of transcription by RNA polymerase II);GO:0000981(DNA-binding transcription factor activity, RNA polymerase II-specific);GO:0001227(DNA-binding transcription repressor activity, RNA polymerase II-specific);GO:0001656(metanephros development);GO:0003677(DNA binding);GO:0005634(nucleus);GO:0006355(regulation of transcription, DNA-templated);GO:0006357(regulation of tr…	NA	NA	NA	iroquois homeobox 1 [Source:RGD Symbol;Acc:1309060]	protein_coding	3.05757	1.56866	3.49204	1.82295	1.19853	0.992629	2.02244	1.01609	0.0112599	0.248511	up	yes
ENSRNOG00000022911	Hjurp	ENSRNOT00000051065	GO:0000775(chromosome, centromeric region);GO:0000777(condensed chromosome kinetochore);GO:0003674(molecular_function);GO:0003677(DNA binding);GO:0005575(cellular_component);GO:0005634(nucleus);GO:0007059(chromosome segregation);GO:0008150(biological_process);GO:0034080(CENP-A containing nucleosome assembly);GO:0042393(histone binding);GO:0042802(identical protein binding);GO:0043254(regulation o…	NA	NA	NA	Holliday junction recognition protein [Source:RGD Symbol;Acc:1305846]	protein_coding	0.608303	0.42289	0.389021	1.02818	0.772559	1.24535	0.466241	-1.10085	0.0114148	0.250987	down	yes
ENSRNOG00000058422	Pirb	ENSRNOT00000077327	GO:0016020(membrane);GO:0016021(integral component of membrane)	04380(Osteoclast differentiation)	K06512	NA	paired Ig-like receptor B [Source:RGD Symbol;Acc:1589827]	protein_coding	0.116269	0.351365	0.100007	0.452875	0.445099	0.737664	0.347046	-1.5268	0.0117604	0.255857	down	yes
ENSRNOG00000039255	Gpr31	ENSRNOT00000060121	GO:0002237(response to molecule of bacterial origin);GO:0002931(response to ischemia);GO:0004930(G protein-coupled receptor activity);GO:0005886(plasma membrane);GO:0007165(signal transduction);GO:0007186(G protein-coupled receptor signaling pathway);GO:0010447(response to acidic pH);GO:0016020(membrane);GO:0016021(integral component of membrane);GO:0045125(bioactive lipid receptor activity);GO:0…	NA	K08406	NA	G protein-coupled receptor 31 [Source:RGD Symbol;Acc:1305187]	protein_coding	0.617793	0.496164	0.543469	0.754444	1.89986	1.50724	0.398272	-1.32818	0.0122039	0.261773	down	yes
ENSRNOG00000009448	Papln	ENSRNOT00000012757	GO:0004222(metalloendopeptidase activity);GO:0004867(serine-type endopeptidase inhibitor activity);GO:0005576(extracellular region);GO:0005604(basement membrane);GO:0006508(proteolysis);GO:0008233(peptidase activity);GO:0010951(negative regulation of endopeptidase activity);GO:0030198(extracellular matrix organization);GO:0031012(extracellular matrix)	NA	NA	NA	papilin, proteoglycan-like sulfated glycoprotein [Source:RGD Symbol;Acc:1311176]	protein_coding	0.35173	0.608901	0.290445	0.6474	0.687909	1.3959	0.458067	-1.12637	0.0125	0.265789	down	yes
ENSRNOG00000026848	Tex36	ENSRNOT00000037064;ENSRNOT00000086703	NA	NA	NA	NA	testis expressed 36 [Source:RGD Symbol;Acc:1566410]	protein_coding	6.48551	4.74603	6.84539	3.95708	1.30881	3.67849	2.02104	1.0151	0.0125652	0.266674	up	yes
ENSRNOG00000009116	Itgb3bp	ENSRNOT00000012947;ENSRNOT00000090393	GO:0000775(chromosome, centromeric region);GO:0000776(kinetochore);GO:0000777(condensed chromosome kinetochore);GO:0005634(nucleus);GO:0005694(chromosome);GO:0006355(regulation of transcription, DNA-templated);GO:0006915(apoptotic process);GO:0007049(cell cycle);GO:0034080(CENP-A containing nucleosome assembly);GO:0051301(cell division);GO:0051301(cell division)	NA	K11510	NA	integrin subunit beta 3 binding protein [Source:RGD Symbol;Acc:1310044]	protein_coding	0.658978	0.865874	0.740217	0.389562	0.264224	0.257591	2.48532	1.31343	0.0127075	0.267876	up	yes
ENSRNOG00000017286	Ephx2	ENSRNOT00000023385	GO:0000287(magnesium ion binding);GO:0003824(catalytic activity);GO:0004301(epoxide hydrolase activity);GO:0005777(peroxisome);GO:0005829(cytosol);GO:0010628(positive regulation of gene expression);GO:0015643(toxic substance binding);GO:0016311(dephosphorylation);GO:0016787(hydrolase activity);GO:0016791(phosphatase activity);GO:0042577(lipid phosphatase activity);GO:0042632(cholesterol homeostas…	00590(Arachidonic acid metabolism);04146(Peroxisome)	K08726	3.1.3.76;EC:3.3.2.10	epoxide hydrolase 2 [Source:RGD Symbol;Acc:620732]	protein_coding	6.64928	34.903	6.26696	55.3168	73.0647	13.0832	0.33803	-1.56478	0.0127299	0.267876	down	yes
ENSRNOG00000029377	Rpl38	ENSRNOT00000046518	GO:0001501(skeletal system development);GO:0001503(ossification);GO:0002181(cytoplasmic translation);GO:0003735(structural constituent of ribosome);GO:0005840(ribosome);GO:0006412(translation);GO:0006417(regulation of translation);GO:0007605(sensory perception of sound);GO:0014069(postsynaptic density);GO:0022618(ribonucleoprotein complex assembly);GO:0022625(cytosolic large ribosomal subunit);GO…	NA	NA	NA	ribosomal protein L38 [Source:RGD Symbol;Acc:1305573]	protein_coding	18.4761	29.5019	83.9686	21.7615	18.2049	19.9984	2.2004	1.13776	0.0127604	0.268056	up	yes
ENSRNOG00000009550	Sqle	ENSRNOT00000012883	GO:0004506(squalene monooxygenase activity);GO:0005783(endoplasmic reticulum);GO:0005789(endoplasmic reticulum membrane);GO:0006725(cellular aromatic compound metabolic process);GO:0008203(cholesterol metabolic process);GO:0010033(response to organic substance);GO:0016020(membrane);GO:0016021(integral component of membrane);GO:0016126(sterol biosynthetic process);GO:0016491(oxidoreductase activit…	00100(Steroid biosynthesis)	NA	NA	squalene epoxidase [Source:RGD Symbol;Acc:3755]	protein_coding	7.09797	2.19723	1.92575	11.6642	6.01216	6.36142	0.466804	-1.09911	0.0127852	0.268116	down	yes
ENSRNOG00000032798	Slco3a1	ENSRNOT00000082564;ENSRNOT00000043854;ENSRNOT00000076340;ENSRNOT00000075893	GO:0001934(positive regulation of protein phosphorylation);GO:0005515(protein binding);GO:0005886(plasma membrane);GO:0006811(ion transport);GO:0015732(prostaglandin transport);GO:0016020(membrane);GO:0016021(integral component of membrane);GO:0051092(positive regulation of NF-kappaB transcription factor activity);GO:0055085(transmembrane transport);GO:0055085(transmembrane transport)	NA	K14353	NA	solute carrier organic anion transporter family, member 3a1 [Source:RGD Symbol;Acc:620227]	protein_coding;retained_intron	0.449688	0.329215	0.157866	0.983702	0.525278	0.791621	0.407184	-1.29625	0.0129284	0.269727	down	yes
ENSRNOG00000007539	Rsad2	ENSRNOT00000010092	GO:0001650(fibrillar center);GO:0003824(catalytic activity);GO:0005739(mitochondrion);GO:0005741(mitochondrial outer membrane);GO:0005743(mitochondrial inner membrane);GO:0005783(endoplasmic reticulum);GO:0005789(endoplasmic reticulum membrane);GO:0005811(lipid droplet);GO:0009615(response to virus);GO:0034157(positive regulation of toll-like receptor 7 signaling pathway);GO:0034165(positive regu…	05160(Hepatitis C);05164(Influenza A)	K15045	NA	radical S-adenosyl methionine domain containing 2 [Source:RGD Symbol;Acc:620495]	protein_coding	0.266653	0.40287	0.38681	0.296261	1.05899	1.26063	0.403816	-1.30823	0.0130068	0.269979	down	yes
ENSRNOG00000062158	AC134224	ENSRNOT00000092949	NA	NA	NA	NA		lincRNA	7.27708	14.872	10.6913	12.1905	11.0038	53.1195	0.430333	-1.21648	0.0139583	0.282055	down	yes
ENSRNOG00000045626	Pkd1l2	ENSRNOT00000071130	GO:0005262(calcium channel activity);GO:0005509(calcium ion binding);GO:0005515(protein binding);GO:0016020(membrane);GO:0016021(integral component of membrane);GO:0030246(carbohydrate binding);GO:0050982(detection of mechanical stimulus);GO:0070588(calcium ion transmembrane transport)	NA	K04988	NA	polycystin 1 like 2 [Source:RGD Symbol;Acc:1588631]	protein_coding	0.232954	0.452103	0.30323	0.118751	0.093486	0.222354	2.27406	1.18527	0.0140128	0.282222	up	yes
ENSRNOG00000010819	Hspa4l	ENSRNOT00000015474;ENSRNOT00000093727;ENSRNOT00000093207	GO:0000166(nucleotide binding);GO:0005524(ATP binding);GO:0005829(cytosol);GO:0005829(cytosol)	04141(Protein processing in endoplasmic reticulum);04141(Protein processing in endoplasmic reticulum)	K09485	NA	heat shock protein family A (Hsp70) member 4 like [Source:RGD Symbol;Acc:1306528]	protein_coding;retained_intron	0.532555	0.230592	0.335413	0.746338	0.842041	0.633558	0.494415	-1.0162	0.0153831	0.302324	down	yes
ENSRNOG00000008678	Antxr1	ENSRNOT00000011675	GO:0001568(blood vessel development);GO:0004888(transmembrane signaling receptor activity);GO:0005518(collagen binding);GO:0009897(external side of plasma membrane);GO:0009986(cell surface);GO:0016020(membrane);GO:0016021(integral component of membrane);GO:0022414(reproductive process);GO:0031258(lamellipodium membrane);GO:0031527(filopodium membrane);GO:0031532(actin cytoskeleton reorganization)…	04621(NOD-like receptor signaling pathway)	K20909	NA	ANTXR cell adhesion molecule 1 [Source:RGD Symbol;Acc:1307144]	protein_coding	0.188756	0.3305	0.177741	0.441627	0.481899	0.651343	0.442575	-1.17601	0.0155164	0.303491	down	yes
ENSRNOG00000051310	AABR07039345	ENSRNOT00000076781	NA	NA	NA	NA	ribosomal protein S26-like [Source:NCBI gene;Acc:100361756]	processed_pseudogene	5.51088	2.92507	4.77697	1.49782	2.00672	2.24615	2.29762	1.20014	0.0156978	0.305569	up	yes
ENSRNOG00000008165	Tpx2	ENSRNOT00000010851;ENSRNOT00000088481	GO:0000922(spindle pole);GO:0005634(nucleus);GO:0005654(nucleoplasm);GO:0005737(cytoplasm);GO:0005819(spindle);GO:0005856(cytoskeleton);GO:0005874(microtubule);GO:0007020(microtubule nucleation);GO:0007026(negative regulation of microtubule depolymerization);GO:0007049(cell cycle);GO:0015630(microtubule cytoskeleton);GO:0019901(protein kinase binding);GO:0032147(activation of protein kinase activ…	NA	K16812	NA	TPX2, microtubule nucleation factor [Source:RGD Symbol;Acc:1311894]	protein_coding	0.500778	0.283494	0.241302	0.768932	0.978509	0.541798	0.447998	-1.15844	0.0157807	0.306242	down	yes
ENSRNOG00000033434	Casp12	ENSRNOT00000088553;ENSRNOT00000010243	GO:0004197(cysteine-type endopeptidase activity);GO:0005783(endoplasmic reticulum);GO:0006508(proteolysis);GO:0006915(apoptotic process);GO:0008233(peptidase activity);GO:0008234(cysteine-type peptidase activity);GO:0016787(hydrolase activity);GO:0030968(endoplasmic reticulum unfolded protein response);GO:0042981(regulation of apoptotic process);GO:0070059(intrinsic apoptotic signaling pathway in…	04141(Protein processing in endoplasmic reticulum);04210(Apoptosis);04621(NOD-like receptor signaling pathway);05010(Alzheimer disease);05014(Amyotrophic lateral sclerosis (ALS));05020(Prion diseases);05161(Hepatitis B);05161(Hepatitis B)	K04741	EC:3.4.22.-	caspase 12 [Source:RGD Symbol;Acc:621758]	protein_coding	4.077	1.80985	0.932042	5.12358	5.02224	4.60853	0.462161	-1.11353	0.0158257	0.306592	down	yes
ENSRNOG00000054508	Foxp2	ENSRNOT00000087146	GO:0000122(negative regulation of transcription by RNA polymerase II);GO:0000978(RNA polymerase II cis-regulatory region sequence-specific DNA binding);GO:0001227(DNA-binding transcription repressor activity, RNA polymerase II-specific);GO:0002053(positive regulation of mesenchymal cell proliferation);GO:0003677(DNA binding);GO:0003700(DNA-binding transcription factor activity);GO:0005575(cellula…	NA	K09409	NA	forkhead box P2 [Source:RGD Symbol;Acc:1559697]	protein_coding	0.197449	0.207995	0.194764	0.07931	0.057703	0.126718	2.27583	1.1864	0.0174819	0.32771	up	yes
ENSRNOG00000000054	Abhd8	ENSRNOT00000000060	GO:0003824(catalytic activity);GO:0006654(phosphatidic acid biosynthetic process);GO:0016787(hydrolase activity);GO:0042171(lysophosphatidic acid acyltransferase activity);GO:0052689(carboxylic ester hydrolase activity);GO:0055088(lipid homeostasis)	NA	K13701	NA	abhydrolase domain containing 8 [Source:RGD Symbol;Acc:1305693]	protein_coding	0.363894	0.341452	0.354694	1.07343	0.562025	0.713183	0.451342	-1.14771	0.0175088	0.32771	down	yes
ENSRNOG00000038047	Mt1	ENSRNOT00000057898	GO:0003674(molecular_function);GO:0005507(copper ion binding);GO:0005575(cellular_component);GO:0005634(nucleus);GO:0005737(cytoplasm);GO:0005764(lysosome);GO:0005829(cytosol);GO:0006875(cellular metal ion homeostasis);GO:0006882(cellular zinc ion homeostasis);GO:0007263(nitric oxide mediated signal transduction);GO:0008270(zinc ion binding);GO:0010043(response to zinc ion);GO:0010273(detoxificat…	04978(Mineral absorption)	K14739	NA	metallothionein 1 [Source:RGD Symbol;Acc:3117]	protein_coding	88.0732	171.365	287.288	23.232	139.15	80.9533	2.2468	1.16787	0.0177215	0.328782	up	yes
ENSRNOG00000002135	Sgcb	ENSRNOT00000002921;ENSRNOT00000089094	GO:0005856(cytoskeleton);GO:0005886(plasma membrane);GO:0007517(muscle organ development);GO:0016010(dystrophin-associated glycoprotein complex);GO:0016011(dystroglycan complex);GO:0016012(sarcoglycan complex);GO:0016020(membrane);GO:0016021(integral component of membrane);GO:0042383(sarcolemma);GO:0048747(muscle fiber development);GO:0055013(cardiac muscle cell development);GO:0097084(vascular s…	05410(Hypertrophic cardiomyopathy (HCM));05412(Arrhythmogenic right ventricular cardiomyopathy (ARVC));05414(Dilated cardiomyopathy (DCM));05416(Viral myocarditis);05416(Viral myocarditis)	K12566	NA	sarcoglycan, beta [Source:RGD Symbol;Acc:1594202]	protein_coding	0.0905551	0.19537	0.0994626	0.342812	0.229914	0.372833	0.407577	-1.29486	0.0178065	0.329217	down	yes
ENSRNOG00000014870	Slc13a5	ENSRNOT00000020043	GO:0005654(nucleoplasm);GO:0005829(cytosol);GO:0005886(plasma membrane);GO:0006811(ion transport);GO:0006814(sodium ion transport);GO:0006842(tricarboxylic acid transport);GO:0015137(citrate transmembrane transporter activity);GO:0015141(succinate transmembrane transporter activity);GO:0015142(tricarboxylic acid transmembrane transporter activity);GO:0015744(succinate transport);GO:0015746(citrat…	NA	K14445	NA	solute carrier family 13 member 5 [Source:RGD Symbol;Acc:631374]	protein_coding	0.363234	2.25339	1.59049	0.360601	0.26127	0.968376	2.64557	1.40358	0.0179214	0.329413	up	yes
ENSRNOG00000015502	Mfsd14a	ENSRNOT00000020907	GO:0001675(acrosome assembly);GO:0007283(spermatogenesis);GO:0007286(spermatid development);GO:0007289(spermatid nucleus differentiation);GO:0016020(membrane);GO:0016021(integral component of membrane);GO:0022857(transmembrane transporter activity);GO:0030382(sperm mitochondrion organization);GO:0055085(transmembrane transport)	NA	NA	NA	major facilitator superfamily domain containing 14A [Source:RGD Symbol;Acc:9294064]	protein_coding	3.34707	0.921376	0.53402	1.95556	4.89533	5.89636	0.376745	-1.40834	0.0180827	0.331879	down	yes
ENSRNOG00000011800	F3	ENSRNOT00000015836	GO:0001938(positive regulation of endothelial cell proliferation);GO:0002020(protease binding);GO:0002541(activation of plasma proteins involved in acute inflammatory response);GO:0004252(serine-type endopeptidase activity);GO:0005515(protein binding);GO:0005543(phospholipid binding);GO:0005615(extracellular space);GO:0006919(activation of cysteine-type endopeptidase activity involved in apoptoti…	04610(Complement and coagulation cascades);04933(AGE-RAGE signaling pathway in diabetic complications)	K03901	NA	coagulation factor III, tissue factor [Source:RGD Symbol;Acc:2587]	protein_coding	0.420965	0.959889	0.86202	0.320481	0.402674	0.160033	2.53952	1.34456	0.0183444	0.334797	up	yes
ENSRNOG00000046492	Nemp1	ENSRNOT00000072906	GO:0005635(nuclear envelope);GO:0005637(nuclear inner membrane);GO:0016020(membrane);GO:0016021(integral component of membrane)	NA	NA	NA	nuclear envelope integral membrane protein 1 [Source:RGD Symbol;Acc:1587179]	protein_coding	1.05459	0.515178	1.17614	0.323888	0.487053	0.285128	2.50523	1.32494	0.0184511	0.335112	up	yes
ENSRNOG00000029082	AABR07005031	ENSRNOT00000047044	GO:0005506(iron ion binding);GO:0005737(cytoplasm);GO:0006826(iron ion transport);GO:0006879(cellular iron ion homeostasis);GO:0006880(intracellular sequestering of iron ion);GO:0008198(ferrous iron binding);GO:0008199(ferric iron binding);GO:0046872(metal ion binding)	NA	NA	NA		protein_coding	1.95715	1.38891	5.58906	4.10912	5.07162	13.4319	0.395138	-1.33957	0.0187225	0.33793	down	yes
ENSRNOG00000009795	Nfib	ENSRNOT00000067435;ENSRNOT00000013092;ENSRNOT00000067538	GO:0000122(negative regulation of transcription by RNA polymerase II);GO:0000978(RNA polymerase II cis-regulatory region sequence-specific DNA binding);GO:0000981(DNA-binding transcription factor activity, RNA polymerase II-specific);GO:0001228(DNA-binding transcription activator activity, RNA polymerase II-specific);GO:0001650(fibrillar center);GO:0002062(chondrocyte differentiation);GO:0003677(…	NA	NA	NA	nuclear factor I/B [Source:RGD Symbol;Acc:62015]	protein_coding	1.68232	0.736634	1.12368	0.561707	0.554013	0.646439	2.0104	1.00748	0.0196741	0.349016	up	yes
ENSRNOG00000009590	Stox2	ENSRNOT00000068562;ENSRNOT00000090839	GO:0001893(maternal placenta development);GO:0003674(molecular_function);GO:0005575(cellular_component);GO:0006357(regulation of transcription by RNA polymerase II);GO:0009617(response to bacterium);GO:0009792(embryo development ending in birth or egg hatching);GO:0009792(embryo development ending in birth or egg hatching)	NA	NA	NA	storkhead box 2 [Source:RGD Symbol;Acc:708477]	protein_coding	0.41378	0.202391	0.152021	0.0559713	0.134294	0.11673	2.50229	1.32325	0.0197117	0.349175	up	yes
ENSRNOG00000016222	Ppp1r3g	ENSRNOT00000021704	GO:0000164(protein phosphatase type 1 complex);GO:0005515(protein binding);GO:0005737(cytoplasm);GO:0005979(regulation of glycogen biosynthetic process);GO:0008157(protein phosphatase 1 binding);GO:0019903(protein phosphatase binding);GO:0042593(glucose homeostasis);GO:0045725(positive regulation of glycogen biosynthetic process);GO:2000467(positive regulation of glycogen (starch) synthase activi…	NA	NA	NA	protein phosphatase 1, regulatory subunit 3G [Source:RGD Symbol;Acc:1308930]	protein_coding	1.41258	2.38262	5.79543	0.456652	1.02549	2.17507	2.62239	1.39088	0.0198805	0.351145	up	yes
ENSRNOG00000009979	Sebox	ENSRNOT00000013296	GO:0003677(DNA binding);GO:0005634(nucleus);GO:0009792(embryo development ending in birth or egg hatching);GO:0048477(oogenesis)	NA	NA	NA	SEBOX homeobox [Source:RGD Symbol;Acc:62077]	protein_coding	2.84191	4.29801	2.75955	1.5483	1.9862	0.775237	2.297	1.19975	0.0201554	0.354343	up	yes
ENSRNOG00000008445	Dact1	ENSRNOT00000011466	GO:0000122(negative regulation of transcription by RNA polymerase II);GO:0001085(RNA polymerase II transcription factor binding);GO:0001702(gastrulation with mouth forming second);GO:0005080(protein kinase C binding);GO:0005634(nucleus);GO:0005654(nucleoplasm);GO:0005737(cytoplasm);GO:0007275(multicellular organism development);GO:0008013(beta-catenin binding);GO:0021915(neural tube development);…	NA	K22154	NA	dishevelled-binding antagonist of beta-catenin 1 [Source:RGD Symbol;Acc:1564008]	protein_coding	0.631715	0.074951	1.91862	0.166118	0.033356	0.398726	4.38865	2.13378	0.0203531	0.354364	up	yes
ENSRNOG00000059825	AC120486	ENSRNOT00000086128	NA	NA	NA	NA		lincRNA	1.62949	1.71346	2.48392	0.865434	0.738195	1.01489	2.22525	1.15397	0.020597	0.356503	up	yes
ENSRNOG00000001082	Abcb9	ENSRNOT00000045223	GO:0000166(nucleotide binding);GO:0005524(ATP binding);GO:0005764(lysosome);GO:0005765(lysosomal membrane);GO:0015440(ATPase-coupled peptide transmembrane transporter activity);GO:0015833(peptide transport);GO:0016020(membrane);GO:0016021(integral component of membrane);GO:0016887(ATPase activity);GO:0022857(transmembrane transporter activity);GO:0030176(integral component of endoplasmic reticulu…	02010(ABC transporters);04142(Lysosome)	K05656	NA	ATP binding cassette subfamily B member 9 [Source:RGD Symbol;Acc:620254]	protein_coding	0.185053	0.091665	0.163291	0.363762	0.342015	0.239256	0.465602	-1.10283	0.0213521	0.364018	down	yes
ENSRNOG00000011475	Srcin1	ENSRNOT00000016070	GO:0005515(protein binding);GO:0005737(cytoplasm);GO:0005856(cytoskeleton);GO:0006887(exocytosis);GO:0007162(negative regulation of cell adhesion);GO:0014069(postsynaptic density);GO:0015629(actin cytoskeleton);GO:0019901(protein kinase binding);GO:0019904(protein domain specific binding);GO:0030027(lamellipodium);GO:0030054(cell junction);GO:0030175(filopodium);GO:0030334(regulation of cell migr…	NA	K19930	NA	SRC kinase signaling inhibitor 1 [Source:RGD Symbol;Acc:708439]	protein_coding	0.190209	0.089094	0.03975	0.315146	0.33135	0.202392	0.375848	-1.41178	0.0213549	0.364018	down	yes
ENSRNOG00000013555	Ankrd55	ENSRNOT00000018438	GO:0005515(protein binding)	NA	NA	NA	ankyrin repeat domain 55 [Source:RGD Symbol;Acc:1307735]	protein_coding	0.19881	0.089778	0.17255	0.364851	0.260862	0.497375	0.410598	-1.2842	0.0214567	0.365242	down	yes
ENSRNOG00000042721	Gimd1	ENSRNOT00000064628	GO:0000166(nucleotide binding);GO:0005525(GTP binding)	NA	NA	NA	GIMAP family P-loop NTPase domain containing 1 [Source:RGD Symbol;Acc:1563706]	protein_coding	1.32236	0.189898	4.89499	4.04309	5.8605	9.86852	0.324055	-1.62569	0.0217696	0.369907	down	yes
ENSRNOG00000058847	AABR07044001	ENSRNOT00000089288	NA	NA	NA	NA		lincRNA	3.07297	0.791401	1.51948	1.2968	2.84761	10.0353	0.379685	-1.39712	0.022907	0.380522	down	yes
ENSRNOG00000061152	AABR07018038	ENSRNOT00000090573;ENSRNOT00000078051	GO:0003950(NAD+ ADP-ribosyltransferase activity);GO:0005515(protein binding);GO:0006471(protein ADP-ribosylation);GO:0006471(protein ADP-ribosylation)	NA	NA	NA		protein_coding;nonsense_mediated_decay	0.630776	0.562284	0.553476	0.250014	0.0543907	0.405363	2.46072	1.29908	0.0229155	0.380522	up	yes
ENSRNOG00000031641	Rpl35a	ENSRNOT00000042285	GO:0000049(tRNA binding);GO:0002181(cytoplasmic translation);GO:0003723(RNA binding);GO:0003735(structural constituent of ribosome);GO:0005840(ribosome);GO:0006412(translation);GO:0022625(cytosolic large ribosomal subunit);GO:0042273(ribosomal large subunit biogenesis)	03010(Ribosome)	K02917	NA	ribosomal protein L35a [Source:RGD Symbol;Acc:2323795]	protein_coding	34.7397	11.235	9.40805	8.90532	8.15554	9.68463	2.07073	1.05014	0.0233176	0.381489	up	yes
ENSRNOG00000060438	AABR07001634	ENSRNOT00000078019	NA	NA	NA	NA		lincRNA	1.62395	1.17998	1.17928	0.53405	0.829799	0.574426	2.05503	1.03916	0.0234874	0.382244	up	yes
ENSRNOG00000043094	Oxct1	ENSRNOT00000065313	GO:0005654(nucleoplasm);GO:0005739(mitochondrion);GO:0005759(mitochondrial matrix);GO:0007420(brain development);GO:0007507(heart development);GO:0007584(response to nutrient);GO:0008260(3-oxoacid CoA-transferase activity);GO:0008410(CoA-transferase activity);GO:0009725(response to hormone);GO:0014823(response to activity);GO:0016740(transferase activity);GO:0035774(positive regulation of insulin…	00072(Synthesis and degradation of ketone bodies);00280(Valine, leucine and isoleucine degradation);00650(Butanoate metabolism)	K01027	EC:2.8.3.5	3-oxoacid CoA transferase 1 [Source:RGD Symbol;Acc:1584008]	protein_coding	0.358686	0.329113	0.274099	0.574907	0.821567	0.53802	0.497235	-1.008	0.0235405	0.382244	down	yes
ENSRNOG00000045543	Frat2	ENSRNOT00000072055	GO:0005737(cytoplasm);GO:0016055(Wnt signaling pathway)	04310(Wnt signaling pathway);05200(Pathways in cancer);05224(Breast cancer);05225(Hepatocellular carcinoma);05226(Gastric cancer)	K03096	NA	FRAT regulator of WNT signaling pathway 2 [Source:RGD Symbol;Acc:1591882]	protein_coding	1.04583	1.55677	1.42637	0.496735	0.486199	0.77513	2.29171	1.19642	0.0239656	0.383355	up	yes
ENSRNOG00000038955	MGC105567	ENSRNOT00000040116	GO:0003924(GTPase activity);GO:0005525(GTP binding);GO:0005789(endoplasmic reticulum membrane);GO:0006952(defense response);GO:0016020(membrane);GO:0035458(cellular response to interferon-beta)	NA	NA	NA	similar to cDNA sequence BC023105 [Source:RGD Symbol;Acc:1565797]	protein_coding	0.6715	0.759216	0.652075	0.582288	1.67983	2.28958	0.457585	-1.12789	0.0243725	0.385725	down	yes
ENSRNOG00000007765	Frzb	ENSRNOT00000010247	GO:0003674(molecular_function);GO:0005515(protein binding);GO:0005575(cellular_component);GO:0005576(extracellular region);GO:0005615(extracellular space);GO:0005737(cytoplasm);GO:0007275(multicellular organism development);GO:0008150(biological_process);GO:0008285(negative regulation of cell population proliferation);GO:0010721(negative regulation of cell development);GO:0014033(neural crest cel…	NA	NA	NA	frizzled-related protein [Source:RGD Symbol;Acc:1311315]	protein_coding	0.361649	0.245548	0.242061	0.797791	0.378881	0.665688	0.460962	-1.11728	0.0244828	0.385725	down	yes
ENSRNOG00000053643	LOC100910710	ENSRNOT00000089442	NA	NA	NA	NA	NADH dehydrogenase [ubiquinone] 1 alpha subcomplex subunit 12-like [Source:RGD Symbol;Acc:6496868]	lincRNA	0.0001	0.759703	0.285855	2.79869	0.219411	1.91099	0.21214	-2.23691	0.0264351	0.403301	down	yes
ENSRNOG00000059922	AABR07019442	ENSRNOT00000090685	NA	NA	NA	NA		lincRNA	2.78681	2.58048	3.99519	2.15385	1.34047	0.756459	2.20253	1.13916	0.0266267	0.405211	up	yes
ENSRNOG00000002046	Cd200r1l	ENSRNOT00000043917;ENSRNOT00000042447	GO:0009897(external side of plasma membrane);GO:0016020(membrane);GO:0016021(integral component of membrane);GO:0038023(signaling receptor activity);GO:0150077(regulation of neuroinflammatory response);GO:0150077(regulation of neuroinflammatory response)	NA	NA	NA	CD200 receptor 1-like [Source:RGD Symbol;Acc:1563387]	protein_coding	1.97124	2.16969	2.39004	1.87793	6.1525	5.25193	0.491704	-1.02414	0.0266992	0.405761	down	yes
ENSRNOG00000047734	Chst2	ENSRNOT00000075305	GO:0000139(Golgi membrane);GO:0001517(N-acetylglucosamine 6-O-sulfotransferase activity);GO:0005654(nucleoplasm);GO:0005794(Golgi apparatus);GO:0005802(trans-Golgi network);GO:0005829(cytosol);GO:0005975(carbohydrate metabolic process);GO:0006044(N-acetylglucosamine metabolic process);GO:0006790(sulfur compound metabolic process);GO:0008146(sulfotransferase activity);GO:0016020(membrane);GO:00160…	00533(Glycosaminoglycan biosynthesis - keratan sulfate)	K04745	EC:2.8.2.-	carbohydrate sulfotransferase 2 [Source:RGD Symbol;Acc:1306988]	protein_coding	0.428719	0.302654	0.167647	0.927487	0.401663	0.894397	0.404318	-1.30644	0.0272205	0.410547	down	yes
ENSRNOG00000017050	Lmntd2	ENSRNOT00000022954	GO:0048026(positive regulation of mRNA splicing, via spliceosome)	NA	NA	NA	lamin tail domain containing 2 [Source:RGD Symbol;Acc:1307439]	protein_coding	0.676446	0.391528	0.43932	0.246185	0.050222	0.291964	2.56181	1.35716	0.0272465	0.410547	up	yes
ENSRNOG00000006719	Zfp618	ENSRNOT00000037313	GO:0003676(nucleic acid binding);GO:0005634(nucleus);GO:0042802(identical protein binding)	NA	NA	NA	zinc finger protein 618 [Source:RGD Symbol;Acc:1310743]	protein_coding	0.588852	0.70152	0.593524	0.270022	0.434503	0.190732	2.10431	1.07335	0.0275465	0.412349	up	yes
ENSRNOG00000028841	Mt1m	ENSRNOT00000047663	GO:0005634(nucleus);GO:0005737(cytoplasm);GO:0006882(cellular zinc ion homeostasis);GO:0010273(detoxification of copper ion);GO:0046872(metal ion binding);GO:0071276(cellular response to cadmium ion);GO:0071280(cellular response to copper ion);GO:0071294(cellular response to zinc ion)	NA	NA	NA	metallothionein 1M [Source:RGD Symbol;Acc:2324335]	protein_coding	2.82179	10.233	18.8603	1.04784	7.42249	2.51604	2.90497	1.53852	0.0283742	0.419259	up	yes
ENSRNOG00000028415	Cdc20	ENSRNOT00000036151;ENSRNOT00000092742	GO:0000922(spindle pole);GO:0005515(protein binding);GO:0005654(nucleoplasm);GO:0005680(anaphase-promoting complex);GO:0005737(cytoplasm);GO:0005813(centrosome);GO:0005815(microtubule organizing center);GO:0005829(cytosol);GO:0005856(cytoskeleton);GO:0007049(cell cycle);GO:0007064(mitotic sister chromatid cohesion);GO:0008022(protein C-terminus binding);GO:0008284(positive regulation of cell popu…	04110(Cell cycle);04114(Oocyte meiosis);04120(Ubiquitin mediated proteolysis);05166(Human T-cell leukemia virus 1 infection);05203(Viral carcinogenesis);05203(Viral carcinogenesis)	K03363	NA	cell division cycle 20 [Source:RGD Symbol;Acc:620477]	protein_coding;retained_intron	0.448371	0.774959	0.183144	0.673885	1.47693	1.2141	0.417983	-1.25849	0.0286219	0.421897	down	yes
ENSRNOG00000008115	Arhgap11a	ENSRNOT00000010994	GO:0007165(signal transduction)	NA	K20635	NA	Rho GTPase activating protein 11A [Source:RGD Symbol;Acc:1309107]	protein_coding	0.15282	0.212589	0.112599	0.206251	0.418824	0.44902	0.445033	-1.16801	0.0286699	0.422095	down	yes
ENSRNOG00000050743	LOC100911796	ENSRNOT00000082943;ENSRNOT00000050538	GO:0001609(G protein-coupled adenosine receptor activity);GO:0001973(G protein-coupled adenosine receptor signaling pathway);GO:0002553(histamine secretion by mast cell);GO:0002687(positive regulation of leukocyte migration);GO:0004930(G protein-coupled receptor activity);GO:0005886(plasma membrane);GO:0005887(integral component of plasma membrane);GO:0007165(signal transduction);GO:0007186(G pro…	04022(cGMP-PKG signaling pathway);04071(Sphingolipid signaling pathway);04080(Neuroactive ligand-receptor interaction);04080(Neuroactive ligand-receptor interaction)	K04268	NA	adenosine receptor A3-like [Source:RGD Symbol;Acc:6491091]	protein_coding	0.248163	0.603118	0.416111	0.337099	1.7521	1.10125	0.397246	-1.3319	0.0289362	0.424478	down	yes
ENSRNOG00000050499	Mup4	ENSRNOT00000043056;ENSRNOT00000076464;ENSRNOT00000071395	GO:0005549(odorant binding);GO:0005550(pheromone binding);GO:0005576(extracellular region);GO:0005615(extracellular space);GO:0036094(small molecule binding);GO:0036094(small molecule binding)	NA	NA	NA	major urinary protein 4 [Source:RGD Symbol;Acc:735211]	protein_coding	115.087	66.1094	44.0404	84.45	316.974	69.6273	0.478159	-1.06444	0.0290746	0.425997	down	yes
ENSRNOG00000028137	Mki67	ENSRNOT00000038176	GO:0000775(chromosome, centromeric region);GO:0000793(condensed chromosome);GO:0003674(molecular_function);GO:0005515(protein binding);GO:0005575(cellular_component);GO:0005634(nucleus);GO:0005730(nucleolus);GO:0005737(cytoplasm);GO:0006259(DNA metabolic process);GO:0007049(cell cycle);GO:0007088(regulation of mitotic nuclear division);GO:0008022(protein C-terminus binding);GO:0008283(cell popula…	NA	K17582	NA	marker of proliferation Ki-67 [Source:RGD Symbol;Acc:1305476]	protein_coding	0.149714	0.194797	0.070085	0.232883	0.396907	0.247648	0.472507	-1.08159	0.0293613	0.429075	down	yes
ENSRNOG00000027357	Sox17	ENSRNOT00000033116	GO:0000976(transcription regulatory region sequence-specific DNA binding);GO:0000981(DNA-binding transcription factor activity, RNA polymerase II-specific);GO:0001228(DNA-binding transcription activator activity, RNA polymerase II-specific);GO:0001525(angiogenesis);GO:0001570(vasculogenesis);GO:0001656(metanephros development);GO:0001706(endoderm formation);GO:0001828(inner cell mass cellular mor…	04310(Wnt signaling pathway)	K04495	NA	SRY-box transcription factor 17 [Source:RGD Symbol;Acc:1305371]	protein_coding	0.276373	0.223673	0.597725	0.548154	0.840801	0.97649	0.464086	-1.10753	0.0304006	0.436204	down	yes
ENSRNOG00000001259	Cux2	ENSRNOT00000001697	GO:0000122(negative regulation of transcription by RNA polymerase II);GO:0000139(Golgi membrane);GO:0000977(RNA polymerase II regulatory region sequence-specific DNA binding);GO:0000978(RNA polymerase II cis-regulatory region sequence-specific DNA binding);GO:0001227(DNA-binding transcription repressor activity, RNA polymerase II-specific);GO:0003677(DNA binding);GO:0005634(nucleus);GO:0007614(sh…	NA	K09313	NA	cut-like homeobox 2 [Source:RGD Symbol;Acc:1305967]	protein_coding	2.22612	0.342103	6.89782	0.272102	0.169344	2.14283	3.66294	1.873	0.0304146	0.436204	up	yes
ENSRNOG00000011431	Mfhas1	ENSRNOT00000015203	GO:0000166(nucleotide binding);GO:0003674(molecular_function);GO:0005515(protein binding);GO:0005525(GTP binding);GO:0005575(cellular_component);GO:0005737(cytoplasm);GO:0006952(defense response);GO:0006954(inflammatory response);GO:0008150(biological_process);GO:0030218(erythrocyte differentiation);GO:0031625(ubiquitin protein ligase binding);GO:0034121(regulation of toll-like receptor signaling…	NA	NA	NA	malignant fibrous histiocytoma amplified sequence 1 [Source:RGD Symbol;Acc:1308812]	protein_coding	0.430272	0.157243	0.395857	0.496576	0.728559	0.863925	0.470725	-1.08704	0.030594	0.437236	down	yes
ENSRNOG00000012874	Rgma	ENSRNOT00000068766;ENSRNOT00000076446	GO:0001843(neural tube closure);GO:0003674(molecular_function);GO:0005102(signaling receptor binding);GO:0005886(plasma membrane);GO:0009986(cell surface);GO:0010975(regulation of neuron projection development);GO:0010976(positive regulation of neuron projection development);GO:0010977(negative regulation of neuron projection development);GO:0015026(coreceptor activity);GO:0016020(membrane);GO:00…	04350(TGF-beta signaling pathway);04360(Axon guidance);04360(Axon guidance)	K23096	NA	repulsive guidance molecule BMP co-receptor a [Source:RGD Symbol;Acc:1311983]	protein_coding;retained_intron	0.388437	0.230408	0.993996	0.143784	0.35881	0.111897	2.62468	1.39214	0.0308537	0.439694	up	yes
ENSRNOG00000055751	P3h2	ENSRNOT00000089540	GO:0005506(iron ion binding);GO:0005515(protein binding);GO:0005604(basement membrane);GO:0005654(nucleoplasm);GO:0005783(endoplasmic reticulum);GO:0005794(Golgi apparatus);GO:0008285(negative regulation of cell population proliferation);GO:0016491(oxidoreductase activity);GO:0016705(oxidoreductase activity, acting on paired donors, with incorporation or reduction of molecular oxygen);GO:0019511(…	NA	K22459	EC:1.14.11.7	prolyl 3-hydroxylase 2 [Source:RGD Symbol;Acc:1304568]	protein_coding	0.24212	0.418923	0.696891	0.809766	0.858516	1.14064	0.483436	-1.0486	0.0317011	0.445383	down	yes
ENSRNOG00000051193	AABR07010030	ENSRNOT00000076198	NA	NA	NA	NA		processed_pseudogene	0.378272	0.554613	1.90575	1.50748	1.69612	3.58393	0.418214	-1.25769	0.0317871	0.445383	down	yes
ENSRNOG00000029792	NEWGENE_1308171	ENSRNOT00000020532	GO:0005515(protein binding);GO:0007165(signal transduction);GO:0008083(growth factor activity);GO:0048662(negative regulation of smooth muscle cell proliferation)	NA	K08126	NA	osteoglycin [Source:RGD Symbol;Acc:11378586]	protein_coding	0.0001	0.0001	0.763014	1.31532	1.56327	2.4477	0.143292	-2.80297	0.0321663	0.445743	down	yes
ENSRNOG00000004441	Fcmr	ENSRNOT00000038822	GO:0016020(membrane);GO:0016021(integral component of membrane)	NA	NA	NA	Fc fragment of IgM receptor [Source:RGD Symbol;Acc:1359282]	protein_coding	0.226079	0.315015	0.276406	0.449097	0.615614	0.723474	0.457167	-1.12921	0.0323809	0.446673	down	yes
ENSRNOG00000008990	Amotl1	ENSRNOT00000061616	GO:0001525(angiogenesis);GO:0003365(establishment of cell polarity involved in ameboidal cell migration);GO:0005886(plasma membrane);GO:0005923(bicellular tight junction);GO:0008180(COP9 signalosome);GO:0016324(apical plasma membrane);GO:0030027(lamellipodium);GO:0030036(actin cytoskeleton organization);GO:0030334(regulation of cell migration);GO:0031410(cytoplasmic vesicle);GO:0035329(hippo sign…	NA	NA	NA	angiomotin-like 1 [Source:RGD Symbol;Acc:1305268]	protein_coding	0.156847	0.274373	0.307699	0.345392	0.577931	0.641436	0.472225	-1.08245	0.0328792	0.452413	down	yes
ENSRNOG00000001389	Irs3	ENSRNOT00000001874	GO:0005158(insulin receptor binding);GO:0005829(cytosol);GO:0005886(plasma membrane);GO:0008286(insulin receptor signaling pathway);GO:0043231(intracellular membrane-bounded organelle);GO:0043548(phosphatidylinositol 3-kinase binding)	04022(cGMP-PKG signaling pathway);04068(FoxO signaling pathway);04140(Autophagy - animal);04152(AMPK signaling pathway);04211(Longevity regulating pathway);04213(Longevity regulating pathway - multiple species);04910(Insulin signaling pathway);04920(Adipocytokine signaling pathway);04923(Regulation of lipolysis in adipocytes);04930(Type II diabetes mellitus)	K17445	NA	insulin receptor substrate 3 [Source:RGD Symbol;Acc:69317]	protein_coding	0.857131	0.712312	0.497764	1.98561	1.60492	0.679942	0.48407	-1.04671	0.0336581	0.46002	down	yes
ENSRNOG00000049708	Wdr62	ENSRNOT00000047120;ENSRNOT00000081282	GO:0000922(spindle pole);GO:0002052(positive regulation of neuroblast proliferation);GO:0003674(molecular_function);GO:0005515(protein binding);GO:0005575(cellular_component);GO:0005634(nucleus);GO:0005813(centrosome);GO:0007052(mitotic spindle organization);GO:0007099(centriole replication);GO:0021987(cerebral cortex development);GO:0022008(neurogenesis);GO:0045664(regulation of neuron different…	NA	NA	NA	WD repeat domain 62 [Source:RGD Symbol;Acc:1306714]	protein_coding	0.0001	0.262079	0.208494	0.0001	0.0568862	0.0001	8.24495	3.04351	0.0339491	0.460387	up	yes
ENSRNOG00000027511	AC119015	ENSRNOT00000000260	NA	NA	NA	NA		processed_pseudogene	2.51566	3.40055	2.40519	0.870994	2.14538	0.849129	2.15274	1.10617	0.0341543	0.462143	up	yes
ENSRNOG00000013953	Ntrk1	ENSRNOT00000018961;ENSRNOT00000092935;ENSRNOT00000092760;ENSRNOT00000092780;ENSRNOT00000092860	GO:0000139(Golgi membrane);GO:0000166(nucleotide binding);GO:0001934(positive regulation of protein phosphorylation);GO:0004672(protein kinase activity);GO:0004675(transmembrane receptor protein serine/threonine kinase activity);GO:0004713(protein tyrosine kinase activity);GO:0004714(transmembrane receptor protein tyrosine kinase activity);GO:0005004(GPI-linked ephrin receptor activity);GO:000503…	04010(MAPK signaling pathway);04014(Ras signaling pathway);04151(PI3K-Akt signaling pathway);04210(Apoptosis);04722(Neurotrophin signaling pathway);04750(Inflammatory mediator regulation of TRP channels);05200(Pathways in cancer);05202(Transcriptional misregulation in cancer);05216(Thyroid cancer);05230(Central carbon metabolism in cancer);05230(Central carbon metabolism in cancer)	K03176	EC:2.7.10.1	neurotrophic receptor tyrosine kinase 1 [Source:RGD Symbol;Acc:620144]	protein_coding;retained_intron	0.460045	0.451662	0.867642	0.250563	0.0382058	0.392149	2.61316	1.3858	0.0346846	0.466718	up	yes
ENSRNOG00000016469	Fxyd2	ENSRNOT00000022074;ENSRNOT00000064611	GO:0005515(protein binding);GO:0005886(plasma membrane);GO:0005890(sodium:potassium-exchanging ATPase complex);GO:0006811(ion transport);GO:0006813(potassium ion transport);GO:0006814(sodium ion transport);GO:0008285(negative regulation of cell population proliferation);GO:0015672(monovalent inorganic cation transport);GO:0016020(membrane);GO:0016021(integral component of membrane);GO:0016323(bas…	04022(cGMP-PKG signaling pathway);04024(cAMP signaling pathway);04260(Cardiac muscle contraction);04261(Adrenergic signaling in cardiomyocytes);04911(Insulin secretion);04918(Thyroid hormone synthesis);04919(Thyroid hormone signaling pathway);04960(Aldosterone-regulated sodium reabsorption);04961(Endocrine and other factor-regulated calcium reabsorption);04964(Proximal tubule bicarbonate reclamat…	NA	NA	FXYD domain-containing ion transport regulator 2 [Source:RGD Symbol;Acc:2173]	protein_coding	4.32773	3.34362	1.19546	1.17682	13.5006	11.9054	0.333555	-1.584	0.0356834	0.471355	down	yes
ENSRNOG00000019018	Plat	ENSRNOT00000025763	GO:0001666(response to hypoxia);GO:0003674(molecular_function);GO:0004252(serine-type endopeptidase activity);GO:0005102(signaling receptor binding);GO:0005576(extracellular region);GO:0005615(extracellular space);GO:0005737(cytoplasm);GO:0006508(proteolysis);GO:0008233(peptidase activity);GO:0008236(serine-type peptidase activity);GO:0009986(cell surface);GO:0014909(smooth muscle cell migration)…	04371(Apelin signaling pathway);04610(Complement and coagulation cascades);05202(Transcriptional misregulation in cancer);05215(Prostate cancer);05418(Fluid shear stress and atherosclerosis)	K01343	EC:3.4.21.68	plasminogen activator, tissue type [Source:RGD Symbol;Acc:3342]	protein_coding	0.434155	0.762517	0.218977	1.01407	0.503908	1.84632	0.420786	-1.24884	0.0357328	0.471355	down	yes
ENSRNOG00000040215	Sult1c2	ENSRNOT00000081413;ENSRNOT00000061896	GO:0008146(sulfotransferase activity);GO:0016740(transferase activity);GO:0051923(sulfation);GO:0051923(sulfation)	NA	K01025	EC:2.8.2.-	sulfotransferase family 1C member 2 [Source:RGD Symbol;Acc:621064]	protein_coding	0.666254	1.78096	1.40402	0.984213	0.46125	0.462373	2.01864	1.01338	0.0360472	0.474543	up	yes
ENSRNOG00000018045	AABR07007730	ENSRNOT00000024269	NA	NA	NA	NA		processed_pseudogene	1.00776	3.60634	2.34437	0.588857	1.23084	1.06971	2.40827	1.268	0.0362898	0.475743	up	yes
ENSRNOG00000011081	Serpina7	ENSRNOT00000093401;ENSRNOT00000014739	GO:0005615(extracellular space);GO:0070327(thyroid hormone transport);GO:0070327(thyroid hormone transport)	04918(Thyroid hormone synthesis);04918(Thyroid hormone synthesis)	K20734	NA	serpin family A member 7 [Source:RGD Symbol;Acc:619833]	protein_coding	2.38429	9.35382	5.99382	1.10179	2.07206	5.34697	2.08101	1.05729	0.0367453	0.479141	up	yes
ENSRNOG00000030321	LOC502176	ENSRNOT00000045098	GO:0000028(ribosomal small subunit assembly);GO:0003723(RNA binding);GO:0003735(structural constituent of ribosome);GO:0005840(ribosome);GO:0022627(cytosolic small ribosomal subunit)	NA	NA	NA	hypothetical protein LOC502176 [Source:RGD Symbol;Acc:1560919]	protein_coding	0.687943	1.23328	1.00499	2.96432	2.20071	1.38665	0.446635	-1.16283	0.0369063	0.479287	down	yes
ENSRNOG00000000878	Slc44a4	ENSRNOT00000001174	GO:0005886(plasma membrane);GO:0008292(acetylcholine biosynthetic process);GO:0015220(choline transmembrane transporter activity);GO:0015871(choline transport);GO:0016020(membrane);GO:0016021(integral component of membrane);GO:0016324(apical plasma membrane);GO:0022857(transmembrane transporter activity);GO:0030307(positive regulation of cell growth);GO:0030974(thiamine pyrophosphate transmembran…	05231(Choline metabolism in cancer)	K15377	NA	solute carrier family 44, member 4 [Source:RGD Symbol;Acc:1303167]	protein_coding	0.95721	0.955357	0.716891	0.625433	0.388239	0.253708	2.07472	1.05292	0.0369323	0.479287	up	yes
ENSRNOG00000039379	C17h6orf52	ENSRNOT00000060340	NA	NA	NA	NA	similar to human chromosome 6 open reading frame 52 [Source:RGD Symbol;Acc:1562963]	protein_coding	0.246957	3.238	2.44293	0.500987	0.452447	1.19263	2.76221	1.46582	0.0370708	0.479797	up	yes
ENSRNOG00000043098	Mt2A	ENSRNOT00000067391	GO:0005575(cellular_component);GO:0005634(nucleus);GO:0005737(cytoplasm);GO:0006882(cellular zinc ion homeostasis);GO:0007263(nitric oxide mediated signal transduction);GO:0008144(drug binding);GO:0008270(zinc ion binding);GO:0009617(response to bacterium);GO:0010273(detoxification of copper ion);GO:0035690(cellular response to drug);GO:0036016(cellular response to interleukin-3);GO:0036018(cellu…	04978(Mineral absorption)	K14739	NA	metallothionein 2A [Source:RGD Symbol;Acc:1592345]	protein_coding	468.601	876.668	1672.93	56.6432	755.576	435.619	2.41875	1.27426	0.0372737	0.481913	up	yes
ENSRNOG00000019138	Clec11a	ENSRNOT00000025949	GO:0001503(ossification);GO:0005576(extracellular region);GO:0005615(extracellular space);GO:0005737(cytoplasm);GO:0007165(signal transduction);GO:0008083(growth factor activity);GO:0008284(positive regulation of cell population proliferation);GO:0030246(carbohydrate binding)	NA	NA	NA	C-type lectin domain containing 11A [Source:RGD Symbol;Acc:3627]	protein_coding	0.356378	0.234182	0.224184	0.395618	0.585877	0.649037	0.49968	-1.00092	0.0375527	0.484493	down	yes
ENSRNOG00000011381	Acsbg1	ENSRNOT00000016104;ENSRNOT00000088208	GO:0000038(very long-chain fatty acid metabolic process);GO:0000166(nucleotide binding);GO:0001552(ovarian follicle atresia);GO:0001676(long-chain fatty acid metabolic process);GO:0003674(molecular_function);GO:0003824(catalytic activity);GO:0003996(acyl-CoA ligase activity);GO:0004467(long-chain fatty acid-CoA ligase activity);GO:0005524(ATP binding);GO:0005737(cytoplasm);GO:0005783(endoplasmic …	00061(Fatty acid biosynthesis);00071(Fatty acid degradation);03320(PPAR signaling pathway);04920(Adipocytokine signaling pathway);04920(Adipocytokine signaling pathway)	K15013	EC:6.2.1.3	acyl-CoA synthetase bubblegum family member 1 [Source:RGD Symbol;Acc:708557]	protein_coding	0.339269	0.398413	0.270884	0.178509	1.48919	0.828042	0.404115	-1.30716	0.0379224	0.486729	down	yes
ENSRNOG00000025239	Nudt15	ENSRNOT00000077733;ENSRNOT00000038436	GO:0000278(mitotic cell cycle);GO:0000302(response to reactive oxygen species);GO:0005829(cytosol);GO:0006195(purine nucleotide catabolic process);GO:0006203(dGTP catabolic process);GO:0008413(8-oxo-7,8-dihydroguanosine triphosphate pyrophosphatase activity);GO:0009217(purine deoxyribonucleoside triphosphate catabolic process);GO:0016787(hydrolase activity);GO:0017110(nucleoside-diphosphatase act…	NA	K03574	EC:3.6.1.55	nudix hydrolase 15 [Source:RGD Symbol;Acc:1308292]	protein_coding	1.3484	0.99476	1.12975	0.733008	0.548652	0.35779	2.11834	1.08293	0.0383503	0.488077	up	yes
ENSRNOG00000016853	Dsg1	ENSRNOT00000061344;ENSRNOT00000038635;ENSRNOT00000022665	GO:0003674(molecular_function);GO:0005509(calcium ion binding);GO:0005886(plasma membrane);GO:0005911(cell-cell junction);GO:0007155(cell adhesion);GO:0007156(homophilic cell adhesion via plasma membrane adhesion molecules);GO:0009898(cytoplasmic side of plasma membrane);GO:0016020(membrane);GO:0016021(integral component of membrane);GO:0016324(apical plasma membrane);GO:0016328(lateral plasma me…	05150(Staphylococcus aureus infection);05150(Staphylococcus aureus infection)	K07596	NA	desmoglein 1 [Source:RGD Symbol;Acc:1309925]	protein_coding	0.633766	1.05274	0.246045	0.317498	0.362496	0.125961	2.39784	1.26173	0.0385998	0.489212	up	yes
ENSRNOG00000053015	Ccdc189	ENSRNOT00000078779	NA	NA	NA	NA	coiled-coil domain containing 189 [Source:RGD Symbol;Acc:1593368]	protein_coding	0.924562	0.722833	0.923158	0.445359	0.449243	0.38852	2.00336	1.00242	0.0390263	0.491773	up	yes
ENSRNOG00000031475	Col16a1	ENSRNOT00000067663	GO:0005178(integrin binding);GO:0005201(extracellular matrix structural constituent);GO:0005588(collagen type V trimer);GO:0005615(extracellular space);GO:0007155(cell adhesion);GO:0030198(extracellular matrix organization);GO:0031012(extracellular matrix);GO:0033622(integrin activation);GO:0033627(cell adhesion mediated by integrin);GO:0051894(positive regulation of focal adhesion assembly);GO:0…	NA	NA	NA	collagen type XVI alpha 1 chain [Source:RGD Symbol;Acc:1310982]	protein_coding	0.192838	0.203846	0.052078	0.343979	0.112752	0.729588	0.378281	-1.40247	0.0426491	0.520532	down	yes
ENSRNOG00000052795	Itpr3	ENSRNOT00000090925	GO:0005216(ion channel activity);GO:0005220(inositol 1,4,5-trisphosphate-sensitive calcium-release channel activity);GO:0005262(calcium channel activity);GO:0005634(nucleus);GO:0005654(nucleoplasm);GO:0005730(nucleolus);GO:0005737(cytoplasm);GO:0005783(endoplasmic reticulum);GO:0005789(endoplasmic reticulum membrane);GO:0005886(plasma membrane);GO:0005887(integral component of plasma membrane);GO…	04020(Calcium signaling pathway);04022(cGMP-PKG signaling pathway);04070(Phosphatidylinositol signaling system);04114(Oocyte meiosis);04210(Apoptosis);04218(Cellular senescence);04270(Vascular smooth muscle contraction);04371(Apelin signaling pathway);04540(Gap junction);04611(Platelet activation);04621(NOD-like receptor signaling pathway);04625(C-type lectin receptor signaling pathway);04713(Cir…	K04960	NA	inositol 1,4,5-trisphosphate receptor, type 3 [Source:RGD Symbol;Acc:2934]	protein_coding	0.060531	0.239841	0.166893	0.050449	0.058132	0.09752	2.26717	1.18089	0.0435777	0.524845	up	yes
ENSRNOG00000012049	Sox7	ENSRNOT00000016503	GO:0000976(transcription regulatory region sequence-specific DNA binding);GO:0000981(DNA-binding transcription factor activity, RNA polymerase II-specific);GO:0001706(endoderm formation);GO:0003674(molecular_function);GO:0003677(DNA binding);GO:0003700(DNA-binding transcription factor activity);GO:0005575(cellular_component);GO:0005634(nucleus);GO:0005667(transcription factor complex);GO:0005737(…	NA	K09270	NA	SRY-box transcription factor 7 [Source:RGD Symbol;Acc:1310038]	protein_coding	0.164554	0.147288	0.201249	0.331446	0.303399	0.393742	0.498831	-1.00338	0.0441949	0.525412	down	yes
ENSRNOG00000048088	Mest	ENSRNOT00000072698	GO:0003824(catalytic activity)	NA	NA	NA	mesoderm specific transcript [Source:RGD Symbol;Acc:1594589]	protein_coding	0.602688	1.09447	0.553604	1.27203	1.36089	1.90956	0.495491	-1.01307	0.0455202	0.532626	down	yes
ENSRNOG00000001270	Hvcn1	ENSRNOT00000001712	GO:0005216(ion channel activity);GO:0005886(plasma membrane);GO:0005887(integral component of plasma membrane);GO:0006811(ion transport);GO:0009268(response to pH);GO:0010043(response to zinc ion);GO:0016020(membrane);GO:0016021(integral component of membrane);GO:0016324(apical plasma membrane);GO:0022843(voltage-gated cation channel activity);GO:0030171(voltage-gated proton channel activity);GO:…	NA	K22644	NA	hydrogen voltage-gated channel 1 [Source:RGD Symbol;Acc:1310788]	protein_coding	0.115583	0.172712	0.346435	0.032644	1.1391	0.974845	0.295692	-1.75783	0.0455602	0.532626	down	yes
ENSRNOG00000052641	LOC103690060	ENSRNOT00000083989	NA	NA	NA	NA	uncharacterized protein C1orf168 homolog [Source:RGD Symbol;Acc:9107607]	lincRNA	0.25555	0.299135	0.234364	0.321313	0.357689	0.977281	0.476397	-1.06976	0.0460049	0.534575	down	yes
ENSRNOG00000008946	AABR07059171	ENSRNOT00000011839	NA	NA	NA	NA		processed_pseudogene	2.27937	2.30536	2.11441	1.34476	9.26402	4.54092	0.442196	-1.17724	0.0463031	0.536176	down	yes
ENSRNOG00000011070	Gnb4	ENSRNOT00000014871;ENSRNOT00000087803	GO:0005515(protein binding);GO:0007165(signal transduction);GO:0007165(signal transduction)	04014(Ras signaling pathway);04062(Chemokine signaling pathway);04151(PI3K-Akt signaling pathway);04371(Apelin signaling pathway);04713(Circadian entrainment);04723(Retrograde endocannabinoid signaling);04724(Glutamatergic synapse);04725(Cholinergic synapse);04726(Serotonergic synapse);04727(GABAergic synapse);04728(Dopaminergic synapse);04926(Relaxin signaling pathway);05032(Morphine addiction);…	K04538	NA	G protein subunit beta 4 [Source:RGD Symbol;Acc:1359321]	protein_coding	0.654395	0.698509	0.420264	0.536606	1.79659	1.38295	0.477153	-1.06748	0.046989	0.536986	down	yes
ENSRNOG00000005522	Sh3yl1	ENSRNOT00000068208	GO:0005515(protein binding);GO:0006661(phosphatidylinositol biosynthetic process);GO:0019902(phosphatase binding);GO:0032587(ruffle membrane);GO:0035091(phosphatidylinositol binding);GO:1900027(regulation of ruffle assembly)	NA	K20523	NA	SH3 and SYLF domain containing 1 [Source:RGD Symbol;Acc:1306440]	protein_coding	0.97623	5.60448	3.04965	1.73865	1.16249	1.81231	2.04316	1.03081	0.0484221	0.544921	up	yes

## Sheet: DEGs in response to LTA in HS
Differentially expressed genes (DEGs) in response to LTA under HS were those owned by (LL200+HS vs. L200) when compare (LL200+HS vs. L200) to (HS vs. Control). It is also the gene in red in Figure 4A.
gene_id	gene_name	transcript_id	GO	KEGG	KO_ENTRY	EC	Description	trans_type	FPKM.Control_1	FPKM.Control_2	FPKM.Control_3	FPKM.HS_1	FPKM.HS_2	FPKM.HS_3	FPKM.L200_1	FPKM.L200_2	FPKM.L200_3	FPKM.L200+HS_1	FPKM.L200+HS_2	FPKM.L200+HS_3	pval	qval	significant
ENSRNOG00000021027	Dbp	ENSRNOT00000028546;ENSRNOT00000091597;ENSRNOT00000091606	GO:0000977(RNA polymerase II regulatory region sequence-specific DNA binding);GO:0001228(DNA-binding transcription activator activity, RNA polymerase II-specific);GO:0001889(liver development);GO:0003677(DNA binding);GO:0003700(DNA-binding transcription factor activity);GO:0005634(nucleus);GO:0006355(regulation of transcription, DNA-templated);GO:0006357(regulation of transcription by RNA polymer…	NA	K09056	NA	D-box binding PAR bZIP transcription factor [Source:RGD Symbol;Acc:2491]	protein_coding	2.95376	3.73231	4.42818	1.93075	3.42448	3.21168	2.3733	3.10819	2.35036	48.278	75.4695	81.1837	4.85025e-115	6.02595e-111	yes
ENSRNOG00000018413	Per3	ENSRNOT00000024932;ENSRNOT00000092747;ENSRNOT00000093063;ENSRNOT00000092923;ENSRNOT00000093114;ENSRNOT00000092840;ENSRNOT00000093100;ENSRNOT00000092912	GO:0000122(negative regulation of transcription by RNA polymerase II);GO:0005515(protein binding);GO:0005634(nucleus);GO:0005737(cytoplasm);GO:0032922(circadian regulation of gene expression);GO:0045187(regulation of circadian sleep/wake cycle, sleep);GO:0048511(rhythmic process);GO:0050821(protein stabilization);GO:0050821(protein stabilization)	04710(Circadian rhythm);04713(Circadian entrainment);04713(Circadian entrainment)	K21945	NA	period circadian regulator 3 [Source:RGD Symbol;Acc:621581]	protein_coding;retained_intron	0.213824	0.329698	0.262548	0.291663	0.285813	0.353584	0.394084	0.467811	0.447987	4.41245	4.40474	5.12096	2.36049e-101	1.46634e-97	yes
ENSRNOG00000014448	Arntl	ENSRNOT00000046313	GO:0000976(transcription regulatory region sequence-specific DNA binding);GO:0000978(RNA polymerase II cis-regulatory region sequence-specific DNA binding);GO:0000981(DNA-binding transcription factor activity, RNA polymerase II-specific);GO:0001228(DNA-binding transcription activator activity, RNA polymerase II-specific);GO:0003677(DNA binding);GO:0003700(DNA-binding transcription factor activity…	04710(Circadian rhythm);04728(Dopaminergic synapse)	NA	NA	aryl hydrocarbon receptor nuclear translocator-like [Source:RGD Symbol;Acc:62003]	protein_coding	13.4733	13.9073	14.0394	13.0437	13.9232	13.8458	11.9243	11.3886	12.821	1.20556	0.820495	0.80955	1.22377e-70	3.80102e-67	yes
ENSRNOG00000005341	Upp2	ENSRNOT00000035158	GO:0003824(catalytic activity);GO:0004850(uridine phosphorylase activity);GO:0005737(cytoplasm);GO:0006218(uridine catabolic process);GO:0009116(nucleoside metabolic process);GO:0009166(nucleotide catabolic process);GO:0016740(transferase activity);GO:0016757(transferase activity, transferring glycosyl groups);GO:0016763(transferase activity, transferring pentosyl groups);GO:0042802(identical pro…	00240(Pyrimidine metabolism);00983(Drug metabolism - other enzymes)	K00757	EC:2.4.2.3	uridine phosphorylase 2 [Source:RGD Symbol;Acc:1308188]	protein_coding	6.27158	5.58745	4.43135	9.11613	5.72359	5.76019	1.88501	2.75125	4.36156	28.9542	39.5964	46.7268	6.89748e-44	1.42824e-40	yes
ENSRNOG00000013408	Npas2	ENSRNOT00000059571	GO:0003677(DNA binding);GO:0003700(DNA-binding transcription factor activity);GO:0005634(nucleus);GO:0005654(nucleoplasm);GO:0005667(transcription factor complex);GO:0005737(cytoplasm);GO:0005829(cytosol);GO:0006355(regulation of transcription, DNA-templated);GO:0007623(circadian rhythm);GO:0032922(circadian regulation of gene expression);GO:0042493(response to drug);GO:0042745(circadian sleep/wa…	04710(Circadian rhythm)	K09026	NA	neuronal PAS domain protein 2 [Source:RGD Symbol;Acc:1309681]	protein_coding	3.45937	6.08523	4.64386	5.54046	3.86733	3.93704	4.40813	4.65547	4.1373	0.278452	0.298685	0.056291	1.08294e-28	1.92206e-25	yes
ENSRNOG00000001388	Sds	ENSRNOT00000001875;ENSRNOT00000001876	GO:0003941(L-serine ammonia-lyase activity);GO:0004794(L-threonine ammonia-lyase activity);GO:0005575(cellular_component);GO:0005737(cytoplasm);GO:0005739(mitochondrion);GO:0005829(cytosol);GO:0006094(gluconeogenesis);GO:0006520(cellular amino acid metabolic process);GO:0006565(L-serine catabolic process);GO:0006566(threonine metabolic process);GO:0006567(threonine catabolic process);GO:0009097(i…	00260(Glycine, serine and threonine metabolism);00270(Cysteine and methionine metabolism);00290(Valine, leucine and isoleucine biosynthesis);00290(Valine, leucine and isoleucine biosynthesis)	K17989	4.3.1.19;EC:4.3.1.17	serine dehydratase [Source:RGD Symbol;Acc:67376]	protein_coding	66.8027	155.331	95.7044	256.774	137.644	169.079	19.7142	38.7869	48.271	226.137	280.085	540.766	1.34154e-15	7.57601e-13	yes
ENSRNOG00000013982	Hsd17b2	ENSRNOT00000018795	GO:0001701(in utero embryonic development);GO:0001890(placenta development);GO:0004303(estradiol 17-beta-dehydrogenase activity);GO:0016020(membrane);GO:0016021(integral component of membrane);GO:0016491(oxidoreductase activity);GO:0032526(response to retinoic acid);GO:0047035(testosterone dehydrogenase (NAD+) activity);GO:0055114(oxidation-reduction process)	00140(Steroid hormone biosynthesis);04913(Ovarian steroidogenesis)	K13368	1.1.1.239;EC:1.1.1.62	hydroxysteroid (17-beta) dehydrogenase 2 [Source:RGD Symbol;Acc:621803]	protein_coding	30.5143	35.7941	42.7337	30.6052	30.0154	32.477	78.5259	51.1413	48.5761	312.466	769.531	439.628	4.32269e-65	1.0741e-61	yes
ENSRNOG00000009329	Nr1d1	ENSRNOT00000012537;ENSRNOT00000055333	GO:0000122(negative regulation of transcription by RNA polymerase II);GO:0000790(nuclear chromatin);GO:0000976(transcription regulatory region sequence-specific DNA binding);GO:0000977(RNA polymerase II regulatory region sequence-specific DNA binding);GO:0000978(RNA polymerase II cis-regulatory region sequence-specific DNA binding);GO:0001222(transcription corepressor binding);GO:0001227(DNA-bind…	04710(Circadian rhythm);04710(Circadian rhythm)	K03728	NA	nuclear receptor subfamily 1, group D, member 1 [Source:RGD Symbol;Acc:628827]	protein_coding	2.23855	1.74222	1.82256	2.60501	3.18757	1.91013	7.95768	6.27032	9.56014	28.5432	48.5372	36.9518	3.45651e-81	1.43146e-77	yes
ENSRNOG00000000961	Glt1d1	ENSRNOT00000064526	GO:0005829(cytosol)	NA	NA	NA	glycosyltransferase 1 domain containing 1 [Source:RGD Symbol;Acc:1304896]	protein_coding	1.41655	3.99005	1.36943	5.57375	3.51731	2.07608	1.31463	0.694431	0.684527	4.42632	6.71075	8.69325	1.15392e-09	2.51513e-07	yes
ENSRNOG00000007060	Plin2	ENSRNOT00000009749	GO:0003674(molecular_function);GO:0005634(nucleus);GO:0005737(cytoplasm);GO:0005811(lipid droplet);GO:0005829(cytosol);GO:0005886(plasma membrane);GO:0010890(positive regulation of sequestering of triglyceride);GO:0014070(response to organic cyclic compound);GO:0015909(long-chain fatty acid transport);GO:0019915(lipid storage);GO:0042493(response to drug)	03320(PPAR signaling pathway)	K17284	NA	perilipin 2 [Source:RGD Symbol;Acc:728889]	protein_coding	127.055	84.9898	91.2082	124.926	138.223	139.83	162.446	174.498	176.288	53.3951	40.1091	60.3363	7.84816e-14	3.48234e-11	yes
ENSRNOG00000042717	Ciart	ENSRNOT00000056322;ENSRNOT00000085632	GO:0000976(transcription regulatory region sequence-specific DNA binding);GO:0000978(RNA polymerase II cis-regulatory region sequence-specific DNA binding);GO:0005634(nucleus);GO:0032922(circadian regulation of gene expression);GO:0045475(locomotor rhythm);GO:0045892(negative regulation of transcription, DNA-templated);GO:0070888(E-box binding);GO:0070888(E-box binding)	NA	K21599	NA	circadian associated repressor of transcription [Source:RGD Symbol;Acc:1566380]	protein_coding	0.0430264	0.252068	0.0001	0.052088	0.0343489	0.0001	0.0001	0.0001	0.0001	0.587843	1.61389	0.420101	2.23831e-08	3.61154e-06	yes
ENSRNOG00000017558	Tubb2a	ENSRNOT00000086264;ENSRNOT00000023611	GO:0000166(nucleotide binding);GO:0000226(microtubule cytoskeleton organization);GO:0000278(mitotic cell cycle);GO:0001764(neuron migration);GO:0003924(GTPase activity);GO:0005200(structural constituent of cytoskeleton);GO:0005525(GTP binding);GO:0005737(cytoplasm);GO:0005856(cytoskeleton);GO:0005874(microtubule);GO:0007017(microtubule-based process);GO:0007017(microtubule-based process)	04145(Phagosome);04540(Gap junction);04540(Gap junction)	K07375	NA	tubulin, beta 2A class IIa [Source:RGD Symbol;Acc:1588452]	protein_coding	15.6362	18.9767	20.8614	16.0132	20.977	13.7397	16.0896	17.1203	13.9012	3.91961	4.44155	2.2642	4.16358e-20	5.17283e-17	yes
ENSRNOG00000042978	Ncald	ENSRNOT00000064513;ENSRNOT00000080024	GO:0003073(regulation of systemic arterial blood pressure);GO:0003779(actin binding);GO:0005509(calcium ion binding);GO:0005515(protein binding);GO:0005829(cytosol);GO:0015631(tubulin binding);GO:0019722(calcium-mediated signaling);GO:0030276(clathrin binding);GO:0043014(alpha-tubulin binding);GO:0046872(metal ion binding);GO:0046872(metal ion binding)	04740(Olfactory transduction);04740(Olfactory transduction)	K19695	NA	neurocalcin delta [Source:RGD Symbol;Acc:1560287]	protein_coding	0.755261	4.00504	2.59623	3.56332	2.48339	1.90706	4.16969	2.46401	3.29979	0.479613	0.386106	0.702653	1.32668e-07	1.60026e-05	yes
ENSRNOG00000016791	Chka	ENSRNOT00000022824;ENSRNOT00000023020	GO:0000166(nucleotide binding);GO:0004103(choline kinase activity);GO:0004104(cholinesterase activity);GO:0004305(ethanolamine kinase activity);GO:0005524(ATP binding);GO:0005737(cytoplasm);GO:0006580(ethanolamine metabolic process);GO:0006629(lipid metabolic process);GO:0006646(phosphatidylethanolamine biosynthetic process);GO:0006656(phosphatidylcholine biosynthetic process);GO:0006657(CDP-chol…	00564(Glycerophospholipid metabolism);05231(Choline metabolism in cancer);05231(Choline metabolism in cancer)	NA	NA	choline kinase alpha [Source:RGD Symbol;Acc:61944]	protein_coding	28.9655	68.5957	56.2918	80.1172	64.7349	57.5675	46.3841	46.6477	83.0399	12.666	6.37893	14.4065	3.10837e-13	1.28728e-10	yes
ENSRNOG00000005975	Rpl30	ENSRNOT00000057587	GO:0002181(cytoplasmic translation);GO:0003723(RNA binding);GO:0003735(structural constituent of ribosome);GO:0005634(nucleus);GO:0005829(cytosol);GO:0005840(ribosome);GO:0014069(postsynaptic density);GO:0022625(cytosolic large ribosomal subunit);GO:0031640(killing of cells of other organism);GO:0035368(selenocysteine insertion sequence binding);GO:0042788(polysomal ribosome);GO:0050829(defense r…	03010(Ribosome)	K02908	NA	ribosomal protein L30 [Source:RGD Symbol;Acc:621201]	protein_coding	79.6526	164.633	74.9936	173.33	191.86	77.4015	70.6882	73.8048	81.9741	194.24	234.142	228.197	5.15755e-06	0.000403002	yes
ENSRNOG00000000632	Cdk1	ENSRNOT00000000783;ENSRNOT00000081113;ENSRNOT00000086806	GO:0000086(G2/M transition of mitotic cell cycle);GO:0000166(nucleotide binding);GO:0000278(mitotic cell cycle);GO:0000307(cyclin-dependent protein kinase holoenzyme complex);GO:0003682(chromatin binding);GO:0004672(protein kinase activity);GO:0004674(protein serine/threonine kinase activity);GO:0004693(cyclin-dependent protein serine/threonine kinase activity);GO:0005515(protein binding);GO:0005…	04110(Cell cycle);04114(Oocyte meiosis);04115(p53 signaling pathway);04218(Cellular senescence);04540(Gap junction);04914(Progesterone-mediated oocyte maturation);05170(Human immunodeficiency virus 1 infection);05203(Viral carcinogenesis);05203(Viral carcinogenesis)	K02087	2.7.11.23;EC:2.7.11.22	cyclin-dependent kinase 1 [Source:RGD Symbol;Acc:2319]	protein_coding	0.389642	0.353465	0.43606	0.223636	0.0001	0.1609	0.742019	0.825874	0.624407	0.0001	0.0001	0.034885	3.82099e-06	0.000308259	yes
ENSRNOG00000008519	Dipk2a	ENSRNOT00000086491;ENSRNOT00000011263	GO:0000139(Golgi membrane);GO:0005576(extracellular region);GO:0005615(extracellular space);GO:0014066(regulation of phosphatidylinositol 3-kinase signaling);GO:0030126(COPI vesicle coat);GO:0030137(COPI-coated vesicle);GO:0034392(negative regulation of smooth muscle cell apoptotic process);GO:0060038(cardiac muscle cell proliferation);GO:1900020(positive regulation of protein kinase C activity);…	NA	NA	NA	divergent protein kinase domain 2A [Source:RGD Symbol;Acc:1309079]	protein_coding	7.86192	4.31086	5.94734	5.70707	4.87331	2.7334	7.56674	4.51793	3.83835	1.47172	1.34817	1.16342	4.20111e-11	1.37354e-08	yes
ENSRNOG00000007713	Tmcc3	ENSRNOT00000080291;ENSRNOT00000010316	GO:0005783(endoplasmic reticulum);GO:0012505(endomembrane system);GO:0016020(membrane);GO:0016021(integral component of membrane);GO:0042802(identical protein binding);GO:0071889(14-3-3 protein binding);GO:0071889(14-3-3 protein binding)	NA	NA	NA	transmembrane and coiled-coil domain family 3 [Source:RGD Symbol;Acc:1307241]	protein_coding	3.83478	3.78615	2.97128	4.27997	4.09278	4.00313	3.45536	3.24883	3.54354	0.919924	0.680934	1.34358	4.37571e-17	4.18183e-14	yes
ENSRNOG00000061527	Gck	ENSRNOT00000086343;ENSRNOT00000086474;ENSRNOT00000080147	GO:0000166(nucleotide binding);GO:0000287(magnesium ion binding);GO:0001678(cellular glucose homeostasis);GO:0003824(catalytic activity);GO:0004340(glucokinase activity);GO:0004396(hexokinase activity);GO:0005515(protein binding);GO:0005524(ATP binding);GO:0005536(glucose binding);GO:0005634(nucleus);GO:0005654(nucleoplasm);GO:0005737(cytoplasm);GO:0005739(mitochondrion);GO:0005829(cytosol);GO:00…	00010(Glycolysis / Gluconeogenesis);00052(Galactose metabolism);00500(Starch and sucrose metabolism);00520(Amino sugar and nucleotide sugar metabolism);00524(Neomycin, kanamycin and gentamicin biosynthesis);04910(Insulin signaling pathway);04911(Insulin secretion);04917(Prolactin signaling pathway);04922(Glucagon signaling pathway);04930(Type II diabetes mellitus);04950(Maturity onset diabetes of…	K12407	EC:2.7.1.2	glucokinase [Source:RGD Symbol;Acc:2670]	protein_coding	2.81373	27.2333	5.97913	2.84417	9.59637	18.3847	5.6801	3.47294	0.802239	0.243905	0.225194	0.142815	1.46901e-11	5.36793e-09	yes
ENSRNOG00000051056	AABR07063279	ENSRNOT00000076105	GO:0005576(extracellular region);GO:0005886(plasma membrane);GO:0050728(negative regulation of inflammatory response)	NA	NA	NA	0	protein_coding	3.3699	5.02118	4.53491	6.03674	7.03368	5.74543	5.03703	4.53183	5.06097	1.2366	0.997096	0.807847	7.7819e-19	8.7893e-16	yes
ENSRNOG00000050994	Cttn	ENSRNOT00000028283;ENSRNOT00000090375;ENSRNOT00000047669	GO:0001726(ruffle);GO:0002102(podosome);GO:0005515(protein binding);GO:0005522(profilin binding);GO:0005737(cytoplasm);GO:0005856(cytoskeleton);GO:0005884(actin filament);GO:0005886(plasma membrane);GO:0005905(clathrin-coated pit);GO:0005925(focal adhesion);GO:0005938(cell cortex);GO:0006886(intracellular protein transport);GO:0006897(endocytosis);GO:0006898(receptor-mediated endocytosis);GO:0006…	04530(Tight junction);05100(Bacterial invasion of epithelial cells);05205(Proteoglycans in cancer);05205(Proteoglycans in cancer)	K06106	NA	cortactin [Source:RGD Symbol;Acc:619839]	protein_coding	0.0001	6.69136	0.0001	6.5671	0.0001	0.0001	7.91053	7.27684	0.0001	0.0001	0.0001	0.0001	0.00765752	0.116193	yes
ENSRNOG00000006663	Usp2	ENSRNOT00000036051;ENSRNOT00000009975	GO:0000122(negative regulation of transcription by RNA polymerase II);GO:0004843(thiol-dependent ubiquitin-specific protease activity);GO:0005515(protein binding);GO:0005634(nucleus);GO:0005737(cytoplasm);GO:0005813(centrosome);GO:0005938(cell cortex);GO:0006508(proteolysis);GO:0006511(ubiquitin-dependent protein catabolic process);GO:0007049(cell cycle);GO:0007517(muscle organ development);GO:00…	NA	K11833	EC:3.4.19.12	ubiquitin specific peptidase 2 [Source:RGD Symbol;Acc:621073]	protein_coding	5.4691	11.4987	7.9337	5.76813	9.86573	9.9608	2.08887	1.84616	2.83977	5.97529	11.1821	6.72223	1.76986e-09	3.66479e-07	yes
ENSRNOG00000005464	Lgalsl	ENSRNOT00000008274	GO:0030246(carbohydrate binding)	NA	NA	NA	galectin-like [Source:RGD Symbol;Acc:1307414]	protein_coding	6.36841	4.63701	5.61245	5.07417	4.70563	6.77827	5.8825	4.51578	3.56439	1.50709	1.3586	1.58154	2.22208e-16	1.62395e-13	yes
ENSRNOG00000014876	Lpin2	ENSRNOT00000082005;ENSRNOT00000020476	GO:0003713(transcription coactivator activity);GO:0005634(nucleus);GO:0005789(endoplasmic reticulum membrane);GO:0005829(cytosol);GO:0006629(lipid metabolic process);GO:0008195(phosphatidate phosphatase activity);GO:0009062(fatty acid catabolic process);GO:0016311(dephosphorylation);GO:0016787(hydrolase activity);GO:0019432(triglyceride biosynthetic process);GO:0032869(cellular response to insuli…	00561(Glycerolipid metabolism);00564(Glycerophospholipid metabolism);00564(Glycerophospholipid metabolism)	K15728	EC:3.1.3.4	lipin 2 [Source:RGD Symbol;Acc:1304588]	protein_coding	9.35642	6.56122	6.54048	8.81853	6.31869	4.1052	5.24573	1.20679	1.51588	14.8462	25.9213	19.6703	5.11613e-11	1.55031e-08	yes
ENSRNOG00000047158	Selenbp1	ENSRNOT00000071603	GO:0005515(protein binding);GO:0008430(selenium binding);GO:0018549(methanethiol oxidase activity);GO:0055114(oxidation-reduction process)	NA	K17285	NA	selenium binding protein 1 [Source:RGD Symbol;Acc:620571]	protein_coding	0.268614	51.2795	0.0001	59.2178	0.0001	0.0001	50.2679	0.0001	44.0377	0.0001	0.0001	0.0001	7.44418e-05	0.00371432	yes
ENSRNOG00000030225	Clpx	ENSRNOT00000048302	GO:0000166(nucleotide binding);GO:0003674(molecular_function);GO:0004176(ATP-dependent peptidase activity);GO:0005524(ATP binding);GO:0005575(cellular_component);GO:0005654(nucleoplasm);GO:0005739(mitochondrion);GO:0005759(mitochondrial matrix);GO:0005829(cytosol);GO:0006457(protein folding);GO:0006508(proteolysis);GO:0008150(biological_process);GO:0009368(endopeptidase Clp complex);GO:0009841(mi…	NA	K03544	NA	caseinolytic mitochondrial matrix peptidase chaperone subunit [Source:RGD Symbol;Acc:1304883]	protein_coding	126.983	119.065	104.664	112.701	117.207	105.911	98.2083	97.6938	106.047	47.0571	34.9549	43.3578	5.69743e-14	2.7225e-11	yes
ENSRNOG00000002478	Insig2	ENSRNOT00000003391	GO:0005783(endoplasmic reticulum);GO:0005789(endoplasmic reticulum membrane);GO:0006629(lipid metabolic process);GO:0006641(triglyceride metabolic process);GO:0006695(cholesterol biosynthetic process);GO:0006991(response to sterol depletion);GO:0008134(transcription factor binding);GO:0008142(oxysterol binding);GO:0008202(steroid metabolic process);GO:0008203(cholesterol metabolic process);GO:000…	NA	NA	NA	insulin induced gene 2 [Source:RGD Symbol;Acc:631417]	protein_coding	366.415	326.179	285.661	402.294	343.673	194.472	225.44	228.915	280.98	114.662	88.728	104.565	1.05183e-10	2.97e-08	yes
ENSRNOG00000016353	Nim1k	ENSRNOT00000021964	GO:0000166(nucleotide binding);GO:0000287(magnesium ion binding);GO:0004672(protein kinase activity);GO:0004674(protein serine/threonine kinase activity);GO:0005524(ATP binding);GO:0005634(nucleus);GO:0005737(cytoplasm);GO:0006468(protein phosphorylation);GO:0035556(intracellular signal transduction)	NA	K16310	EC:2.7.11.1	NIM1 serine/threonine protein kinase [Source:RGD Symbol;Acc:1308116]	protein_coding	8.76727	12.2038	11.1864	14.5223	8.76503	2.21625	11.4515	15.6975	15.2964	5.99761	2.47375	3.92061	0.000920301	0.0250742	yes
ENSRNOG00000051171	G6pc	ENSRNOT00000076390;ENSRNOT00000028033;ENSRNOT00000085831	GO:0004346(glucose-6-phosphatase activity);GO:0005783(endoplasmic reticulum);GO:0005789(endoplasmic reticulum membrane);GO:0005977(glycogen metabolic process);GO:0005980(glycogen catabolic process);GO:0006094(gluconeogenesis);GO:0006641(triglyceride metabolic process);GO:0006796(phosphate-containing compound metabolic process);GO:0008202(steroid metabolic process);GO:0009743(response to carbohydr…	00010(Glycolysis / Gluconeogenesis);00052(Galactose metabolism);00500(Starch and sucrose metabolism);04068(FoxO signaling pathway);04151(PI3K-Akt signaling pathway);04152(AMPK signaling pathway);04910(Insulin signaling pathway);04920(Adipocytokine signaling pathway);04922(Glucagon signaling pathway);04931(Insulin resistance);04973(Carbohydrate digestion and absorption);04973(Carbohydrate digestio…	K01084	EC:3.1.3.9	glucose-6-phosphatase, catalytic subunit [Source:RGD Symbol;Acc:2644]	retained_intron;protein_coding	592.688	364.376	600.206	727.366	580.67	407.028	481.162	453.445	478.045	173.558	217.166	218.319	2.22685e-09	4.46231e-07	yes
ENSRNOG00000025923	LOC103693776	ENSRNOT00000052002	GO:0005634(nucleus);GO:0008270(zinc ion binding);GO:0030374(nuclear receptor transcription coactivator activity);GO:0043596(nuclear replication fork);GO:0045944(positive regulation of transcription by RNA polymerase II);GO:0046872(metal ion binding);GO:0048096(chromatin-mediated maintenance of transcription)	NA	K22403	NA	zinc finger MIZ domain-containing protein 2 [Source:RGD Symbol;Acc:9124587]	protein_coding	10.4065	10.3799	8.75446	8.91153	10.6636	7.68978	9.06829	11.2499	9.63502	4.46447	3.49614	4.31417	2.89002e-10	7.48034e-08	yes
ENSRNOG00000042838	Junb	ENSRNOT00000067780	GO:0000977(RNA polymerase II regulatory region sequence-specific DNA binding);GO:0000978(RNA polymerase II cis-regulatory region sequence-specific DNA binding);GO:0001228(DNA-binding transcription activator activity, RNA polymerase II-specific);GO:0001570(vasculogenesis);GO:0001649(osteoblast differentiation);GO:0001701(in utero embryonic development);GO:0001829(trophectodermal cell differentiati…	04380(Osteoclast differentiation);04668(TNF signaling pathway)	K09028	NA	JunB proto-oncogene, AP-1 transcription factor subunit [Source:RGD Symbol;Acc:2944]	protein_coding	13.3382	15.6202	27.97	11.4736	8.2843	13.3144	7.7469	7.93946	7.78866	15.8475	22.1866	40.376	1.29544e-07	1.5779e-05	yes
ENSRNOG00000049593	Wbp11l1	ENSRNOT00000082312;ENSRNOT00000072528	GO:0005634(nucleus);GO:0005681(spliceosomal complex);GO:0005737(cytoplasm);GO:0006364(rRNA processing);GO:0006396(RNA processing);GO:0006397(mRNA processing);GO:0008380(RNA splicing);GO:0016607(nuclear speck);GO:0019888(protein phosphatase regulator activity);GO:0043666(regulation of phosphoprotein phosphatase activity);GO:0045292(mRNA cis splicing, via spliceosome);GO:0050699(WW domain binding);…	03040(Spliceosome);03040(Spliceosome)	K12866	NA	WW domain-binding protein 11-like 1 [Source:RGD Symbol;Acc:9435381]	protein_coding	0.0001	2.10727	0.0222206	2.64335	0.0001	0.0001	0.0001	4.22019	4.58312	0.0001	0.0001	0.0001	0.00207955	0.0464683	yes
ENSRNOG00000017808	Klf15	ENSRNOT00000024011	GO:0000976(transcription regulatory region sequence-specific DNA binding);GO:0000977(RNA polymerase II regulatory region sequence-specific DNA binding);GO:0000978(RNA polymerase II cis-regulatory region sequence-specific DNA binding);GO:0000981(DNA-binding transcription factor activity, RNA polymerase II-specific);GO:0001228(DNA-binding transcription activator activity, RNA polymerase II-specific…	NA	K09210	NA	Kruppel-like factor 15 [Source:RGD Symbol;Acc:70918]	protein_coding	38.6828	43.445	41.5207	32.6336	40.7621	35.6629	16.3467	20.9714	19.3715	40.0864	61.2743	42.4462	4.21984e-10	1.02799e-07	yes
ENSRNOG00000036397	AABR07027722	ENSRNOT00000054512	NA	NA	NA	NA	0	miRNA	432.391	909.544	6.21149	5.54896	393.773	4.30733	4.93578	813.689	450.951	7.07216	3.97936	6.4219	0.000484867	0.0154461	yes
ENSRNOG00000032508	Acot5	ENSRNOT00000013760	GO:0000038(very long-chain fatty acid metabolic process);GO:0001676(long-chain fatty acid metabolic process);GO:0005777(peroxisome);GO:0005829(cytosol);GO:0006629(lipid metabolic process);GO:0006631(fatty acid metabolic process);GO:0006637(acyl-CoA metabolic process);GO:0016790(thiolester hydrolase activity);GO:0032788(saturated monocarboxylic acid metabolic process);GO:0032789(unsaturated monoca…	00062(Fatty acid elongation);01040(Biosynthesis of unsaturated fatty acids)	K01068	EC:3.1.2.2	acyl-CoA thioesterase 5 [Source:RGD Symbol;Acc:1565917]	protein_coding	42.3102	12.3532	11.6342	19.5148	38.3246	34.394	31.3834	21.041	47.8022	10.6371	8.24311	13.5482	0.00066445	0.019702	yes
ENSRNOG00000004247	Nhp2	ENSRNOT00000064984	GO:0000454(snoRNA guided rRNA pseudouridine synthesis);GO:0000469(cleavage involved in rRNA processing);GO:0000470(maturation of LSU-rRNA);GO:0003723(RNA binding);GO:0003730(mRNA 3'-UTR binding);GO:0005634(nucleus);GO:0005697(telomerase holoenzyme complex);GO:0005730(nucleolus);GO:0007004(telomere maintenance via telomerase);GO:0031118(rRNA pseudouridine synthesis);GO:0031120(snRNA pseudouridine …	03008(Ribosome biogenesis in eukaryotes)	K11129	NA	NHP2 ribonucleoprotein [Source:RGD Symbol;Acc:1309435]	protein_coding	0.0001	0.0001	0.0001	0.0001	0.0001	0.0001	0.0001	0.0001	0.0001	7.97104	0.0001	14.1232	7.74255e-16	5.06281e-13	yes
ENSRNOG00000014490	Bdh2	ENSRNOT00000019507	GO:0003858(3-hydroxybutyrate dehydrogenase activity);GO:0005737(cytoplasm);GO:0005829(cytosol);GO:0006635(fatty acid beta-oxidation);GO:0016491(oxidoreductase activity);GO:0030855(epithelial cell differentiation);GO:0051287(NAD binding);GO:0055114(oxidation-reduction process)	00072(Synthesis and degradation of ketone bodies);00650(Butanoate metabolism)	K00019	EC:1.1.1.30	3-hydroxybutyrate dehydrogenase 2 [Source:RGD Symbol;Acc:1309898]	protein_coding	2.77533	3.63666	3.77843	5.18155	6.88855	6.45146	3.57427	2.60011	3.47299	7.66288	10.4462	11.5491	1.01314e-10	2.92728e-08	yes
ENSRNOG00000006052	Sulf2	ENSRNOT00000008478	GO:0001822(kidney development);GO:0002063(chondrocyte development);GO:0003094(glomerular filtration);GO:0003824(catalytic activity);GO:0004065(arylsulfatase activity);GO:0005509(calcium ion binding);GO:0005539(glycosaminoglycan binding);GO:0005615(extracellular space);GO:0005783(endoplasmic reticulum);GO:0005794(Golgi apparatus);GO:0005795(Golgi stack);GO:0005886(plasma membrane);GO:0008449(N-ace…	NA	K14607	EC:3.1.6.-	sulfatase 2 [Source:RGD Symbol;Acc:1305078]	protein_coding	7.04928	8.90455	8.94829	7.97024	14.2368	4.81876	6.48365	7.05159	7.30897	11.2999	24.4872	25.0656	1.01312e-06	9.90804e-05	yes
ENSRNOG00000048874	Gckr	ENSRNOT00000076268;ENSRNOT00000073228	GO:0001678(cellular glucose homeostasis);GO:0004857(enzyme inhibitor activity);GO:0005515(protein binding);GO:0005634(nucleus);GO:0005654(nucleoplasm);GO:0005737(cytoplasm);GO:0005739(mitochondrion);GO:0005829(cytosol);GO:0005975(carbohydrate metabolic process);GO:0006006(glucose metabolic process);GO:0006606(protein import into nucleus);GO:0009750(response to fructose);GO:0019899(enzyme binding)…	NA	NA	NA	glucokinase regulator [Source:RGD Symbol;Acc:2671]	retained_intron;protein_coding	82.4233	92.5645	88.5352	92.3857	111.971	93.8781	103.783	105.679	99.2195	54.9251	40.903	38.0223	5.96367e-09	1.0896e-06	yes
ENSRNOG00000048049	LOC103689951	ENSRNOT00000054858	GO:0005515(protein binding);GO:0048786(presynaptic active zone);GO:0050808(synapse organization)	NA	NA	NA	liprin-alpha-1-like [Source:RGD Symbol;Acc:9445271]	protein_coding	0.0001	3.07304	1.10513	3.25274	0.0001	0.0001	3.03155	2.78601	0.0001	0.0001	0.0001	0.0001	0.00556083	0.0938693	yes
ENSRNOG00000053787	Mdfic	ENSRNOT00000082453	GO:0005634(nucleus);GO:0005730(nucleolus);GO:0005737(cytoplasm);GO:0007257(activation of JUN kinase activity);GO:0008134(transcription factor binding);GO:0030111(regulation of Wnt signaling pathway);GO:0030332(cyclin binding);GO:0030957(Tat protein binding);GO:0042308(negative regulation of protein import into nucleus);GO:0045892(negative regulation of transcription, DNA-templated);GO:0045893(pos…	NA	NA	NA	MyoD family inhibitor domain containing [Source:RGD Symbol;Acc:1309532]	protein_coding	10.0268	13.0541	9.75724	14.5286	14.3491	6.97337	8.64136	9.56238	12.4915	4.63671	4.21801	4.66242	4.72474e-07	5.01711e-05	yes
ENSRNOG00000019383	Tef	ENSRNOT00000026258;ENSRNOT00000086355	GO:0000977(RNA polymerase II regulatory region sequence-specific DNA binding);GO:0000978(RNA polymerase II cis-regulatory region sequence-specific DNA binding);GO:0001228(DNA-binding transcription activator activity, RNA polymerase II-specific);GO:0003677(DNA binding);GO:0003690(double-stranded DNA binding);GO:0003700(DNA-binding transcription factor activity);GO:0005634(nucleus);GO:0006355(regul…	NA	NA	NA	TEF transcription factor, PAR bZIP family member [Source:RGD Symbol;Acc:3841]	protein_coding	6.43423	7.53338	8.18442	7.44877	7.43125	6.07745	8.90236	7.272	6.44482	16.9306	20.1033	16.8453	1.34633e-16	1.04542e-13	yes
ENSRNOG00000009019	Slc6a6	ENSRNOT00000012875;ENSRNOT00000086982	GO:0005328(neurotransmitter:sodium symporter activity);GO:0005368(taurine transmembrane transporter activity);GO:0005369(taurine:sodium symporter activity);GO:0005515(protein binding);GO:0005886(plasma membrane);GO:0005887(integral component of plasma membrane);GO:0006836(neurotransmitter transport);GO:0015185(gamma-aminobutyric acid transmembrane transporter activity);GO:0015293(symporter activi…	NA	K05039	NA	solute carrier family 6 member 6 [Source:RGD Symbol;Acc:61912]	protein_coding	3.24444	1.37767	1.54312	2.72214	2.42785	2.67361	1.50706	1.93598	2.31205	0.432733	0.48348	0.571647	3.78295e-10	9.39987e-08	yes
ENSRNOG00000016595	Hhex	ENSRNOT00000022384	GO:0000122(negative regulation of transcription by RNA polymerase II);GO:0000976(transcription regulatory region sequence-specific DNA binding);GO:0000977(RNA polymerase II regulatory region sequence-specific DNA binding);GO:0000978(RNA polymerase II cis-regulatory region sequence-specific DNA binding);GO:0000981(DNA-binding transcription factor activity, RNA polymerase II-specific);GO:0001227(DN…	04950(Maturity onset diabetes of the young);05202(Transcriptional misregulation in cancer)	K08024	NA	hematopoietically expressed homeobox [Source:RGD Symbol;Acc:619932]	protein_coding	36.2692	121.212	59.2342	40.2096	57.0801	29.2254	20.7027	18.53	22.8984	58.2415	34.0749	83.829	1.37115e-05	0.000930883	yes
ENSRNOG00000020254	Per2	ENSRNOT00000027506	GO:0000122(negative regulation of transcription by RNA polymerase II);GO:0000976(transcription regulatory region sequence-specific DNA binding);GO:0000978(RNA polymerase II cis-regulatory region sequence-specific DNA binding);GO:0001222(transcription corepressor binding);GO:0002931(response to ischemia);GO:0003713(transcription coactivator activity);GO:0005515(protein binding);GO:0005634(nucleus)…	04710(Circadian rhythm);04713(Circadian entrainment);05202(Transcriptional misregulation in cancer);05221(Acute myeloid leukemia)	K02633	NA	period circadian regulator 2 [Source:RGD Symbol;Acc:61945]	protein_coding	2.49525	3.35149	4.62708	1.89182	2.35619	2.66478	2.53914	1.43836	1.36958	4.11746	5.78267	5.82583	9.21122e-08	1.20611e-05	yes
ENSRNOG00000008829	Sorbs3	ENSRNOT00000012056	GO:0000122(negative regulation of transcription by RNA polymerase II);GO:0005515(protein binding);GO:0005634(nucleus);GO:0005737(cytoplasm);GO:0005925(focal adhesion);GO:0007015(actin filament organization);GO:0007155(cell adhesion);GO:0008134(transcription factor binding);GO:0017166(vinculin binding);GO:0031589(cell-substrate adhesion);GO:0043410(positive regulation of MAPK cascade);GO:0051496(p…	NA	NA	NA	sorbin and SH3 domain containing 3 [Source:RGD Symbol;Acc:628900]	protein_coding	7.28747	6.62321	6.02205	5.39977	8.7331	7.90657	9.04462	9.64057	5.67651	18.4897	20.5859	36.8484	1.2318e-15	7.28753e-13	yes
ENSRNOG00000019996	Slc16a1	ENSRNOT00000027234	GO:0005515(protein binding);GO:0005813(centrosome);GO:0005886(plasma membrane);GO:0005887(integral component of plasma membrane);GO:0006629(lipid metabolic process);GO:0007098(centrosome cycle);GO:0008028(monocarboxylic acid transmembrane transporter activity);GO:0009925(basal plasma membrane);GO:0015129(lactate transmembrane transporter activity);GO:0015293(symporter activity);GO:0015718(monocar…	NA	K08179	NA	solute carrier family 16 member 1 [Source:RGD Symbol;Acc:3690]	protein_coding	46.6481	34.9147	31.1873	37.4036	37.493	29.963	37.5335	47.452	34.7695	20.9098	12.4069	15.4576	4.81267e-08	6.71828e-06	yes
ENSRNOG00000020501	Tjp3	ENSRNOT00000089004;ENSRNOT00000027847	GO:0005515(protein binding);GO:0005634(nucleus);GO:0005654(nucleoplasm);GO:0005829(cytosol);GO:0005886(plasma membrane);GO:0005911(cell-cell junction);GO:0005923(bicellular tight junction);GO:0016020(membrane);GO:0016324(apical plasma membrane);GO:0030054(cell junction);GO:2000045(regulation of G1/S transition of mitotic cell cycle);GO:2000045(regulation of G1/S transition of mitotic cell cycle)	04530(Tight junction);04530(Tight junction)	K06097	NA	tight junction protein 3 [Source:RGD Symbol;Acc:1309247]	protein_coding	5.6237	4.5955	4.14269	3.55217	4.72257	4.73736	5.55922	5.22328	4.22464	2.40443	1.92978	2.13192	1.05391e-07	1.34988e-05	yes
ENSRNOG00000046912	Nr1d2	ENSRNOT00000081845;ENSRNOT00000071751	GO:0000122(negative regulation of transcription by RNA polymerase II);GO:0000977(RNA polymerase II regulatory region sequence-specific DNA binding);GO:0000978(RNA polymerase II cis-regulatory region sequence-specific DNA binding);GO:0000987(cis-regulatory region sequence-specific DNA binding);GO:0001227(DNA-binding transcription repressor activity, RNA polymerase II-specific);GO:0003677(DNA bindi…	NA	K08531	NA	nuclear receptor subfamily 1, group D, member 2 [Source:RGD Symbol;Acc:628828]	protein_coding	4.26033	4.32808	3.52058	3.8315	4.59545	3.1114	3.84844	4.36059	6.63153	9.99827	11.8495	12.7814	3.81602e-14	1.89641e-11	yes
ENSRNOG00000009715	Me1	ENSRNOT00000013244;ENSRNOT00000078977	GO:0004470(malic enzyme activity);GO:0004471(malate dehydrogenase (decarboxylating) (NAD+) activity);GO:0004473(malate dehydrogenase (decarboxylating) (NADP+) activity);GO:0006108(malate metabolic process);GO:0016491(oxidoreductase activity);GO:0030145(manganese ion binding);GO:0042802(identical protein binding);GO:0046872(metal ion binding);GO:0051287(NAD binding);GO:0055114(oxidation-reduction …	00620(Pyruvate metabolism);03320(PPAR signaling pathway);03320(PPAR signaling pathway)	K00029	EC:1.1.1.40	malic enzyme 1 [Source:RGD Symbol;Acc:3074]	protein_coding	7.50352	8.9288	12.3604	8.20439	9.84795	6.39787	21.4049	8.8085	13.1951	5.63432	4.45049	4.46008	1.85057e-06	0.000168694	yes
ENSRNOG00000047520	AABR07048475	ENSRNOT00000076466	GO:0005576(extracellular region);GO:0036094(small molecule binding)	NA	NA	NA	0	protein_coding	14.0923	25.2495	10.5166	21.7717	48.3446	13.9674	3.7331	4.10214	11.4826	37.7218	16.9785	43.9747	4.07274e-05	0.00223104	yes
ENSRNOG00000002520	Litaf	ENSRNOT00000003412	GO:0000139(Golgi membrane);GO:0000978(RNA polymerase II cis-regulatory region sequence-specific DNA binding);GO:0001228(DNA-binding transcription activator activity, RNA polymerase II-specific);GO:0001817(regulation of cytokine production);GO:0003677(DNA binding);GO:0005576(extracellular region);GO:0005634(nucleus);GO:0005654(nucleoplasm);GO:0005737(cytoplasm);GO:0005764(lysosome);GO:0005765(lyso…	04142(Lysosome)	K19363	NA	lipopolysaccharide-induced TNF factor [Source:RGD Symbol;Acc:69294]	protein_coding	55.1817	57.0542	45.488	50.2457	48.6752	47.5866	51.1032	53.0999	48.3309	26.0243	24.7699	20.5326	2.32285e-10	6.14022e-08	yes
ENSRNOG00000000588	Slc16a10	ENSRNOT00000000718;ENSRNOT00000087226	GO:0005887(integral component of plasma membrane);GO:0006590(thyroid hormone generation);GO:0015173(aromatic amino acid transmembrane transporter activity);GO:0015349(thyroid hormone transmembrane transporter activity);GO:0015801(aromatic amino acid transport);GO:0016020(membrane);GO:0016021(integral component of membrane);GO:0016323(basolateral plasma membrane);GO:0022857(transmembrane transport…	04919(Thyroid hormone signaling pathway);04974(Protein digestion and absorption);04974(Protein digestion and absorption)	K08187	NA	solute carrier family 16 member 10 [Source:RGD Symbol;Acc:69197]	protein_coding	3.16237	3.43583	4.56296	4.65194	5.20547	5.90882	2.36123	2.82997	1.46727	4.76293	6.29285	8.97579	1.66146e-07	1.98481e-05	yes
ENSRNOG00000054513	Zmiz2	ENSRNOT00000077428	GO:0005634(nucleus);GO:0008270(zinc ion binding);GO:0030374(nuclear receptor transcription coactivator activity);GO:0043596(nuclear replication fork);GO:0045944(positive regulation of transcription by RNA polymerase II);GO:0046872(metal ion binding);GO:0048096(chromatin-mediated maintenance of transcription)	NA	K22403	NA	zinc finger, MIZ-type containing 2 [Source:RGD Symbol;Acc:1309256]	protein_coding	8.88552	9.18278	7.78448	7.78382	6.94701	8.05851	8.84381	10.1906	9.64946	4.94345	3.42794	4.64053	2.58934e-07	2.95137e-05	yes
ENSRNOG00000011016	Slc7a2	ENSRNOT00000015127;ENSRNOT00000014809	GO:0000064(L-ornithine transmembrane transporter activity);GO:0002537(nitric oxide production involved in inflammatory response);GO:0005289(high-affinity arginine transmembrane transporter activity);GO:0005292(high-affinity lysine transmembrane transporter activity);GO:0005886(plasma membrane);GO:0006809(nitric oxide biosynthetic process);GO:0006865(amino acid transport);GO:0015171(amino acid tra…	NA	K13864	NA	solute carrier family 7 member 2 [Source:RGD Symbol;Acc:68387]	protein_coding	55.3591	31.6481	26.8646	66.6242	49.4048	50.2212	31.427	26.5434	28.519	60.2337	71.6706	51.3959	3.66291e-05	0.0020316	yes
ENSRNOG00000015807	Pyroxd2	ENSRNOT00000021257	GO:0016491(oxidoreductase activity);GO:0055114(oxidation-reduction process)	NA	NA	NA	pyridine nucleotide-disulphide oxidoreductase domain 2 [Source:RGD Symbol;Acc:1303232]	protein_coding	10.0212	12.43	12.4946	12.8391	15.3653	14.7501	12.0731	11.7587	13.1989	19.2976	35.0761	37.4134	3.22141e-11	1.0817e-08	yes
ENSRNOG00000004307	Tor3a	ENSRNOT00000005726	GO:0000166(nucleotide binding);GO:0005524(ATP binding);GO:0005635(nuclear envelope);GO:0005737(cytoplasm);GO:0005783(endoplasmic reticulum);GO:0005788(endoplasmic reticulum lumen);GO:0016887(ATPase activity)	NA	K23000	NA	torsin family 3, member A [Source:RGD Symbol;Acc:1310101]	protein_coding	6.48289	4.77107	3.77175	8.11184	10.1163	11.1706	22.8012	9.06897	18.9381	4.01295	1.66535	6.46448	3.96769e-08	5.6526e-06	yes
ENSRNOG00000027833	Fnip2	ENSRNOT00000090152;ENSRNOT00000038543	GO:0000122(negative regulation of transcription by RNA polymerase II);GO:0001932(regulation of protein phosphorylation);GO:0005737(cytoplasm);GO:0005764(lysosome);GO:0005765(lysosomal membrane);GO:0005829(cytosol);GO:0006468(protein phosphorylation);GO:0008630(intrinsic apoptotic signaling pathway in response to DNA damage);GO:0010823(negative regulation of mitochondrion organization);GO:0016020(…	04150(mTOR signaling pathway);04150(mTOR signaling pathway)	K20401	NA	folliculin interacting protein 2 [Source:RGD Symbol;Acc:1562174]	protein_coding	5.70218	3.53569	4.91742	5.3098	5.28588	5.57961	4.12687	5.06489	2.83658	9.4724	8.60108	11.1276	1.17068e-07	1.46914e-05	yes
ENSRNOG00000030387	Kng1	ENSRNOT00000078131;ENSRNOT00000084867;ENSRNOT00000080949;ENSRNOT00000080562;ENSRNOT00000058479	GO:0004866(endopeptidase inhibitor activity);GO:0004869(cysteine-type endopeptidase inhibitor activity);GO:0005102(signaling receptor binding);GO:0005576(extracellular region);GO:0005615(extracellular space);GO:0006953(acute-phase response);GO:0006954(inflammatory response);GO:0007162(negative regulation of cell adhesion);GO:0007204(positive regulation of cytosolic calcium ion concentration);GO:0…	04022(cGMP-PKG signaling pathway);04071(Sphingolipid signaling pathway);04080(Neuroactive ligand-receptor interaction);04610(Complement and coagulation cascades);04750(Inflammatory mediator regulation of TRP channels);04810(Regulation of actin cytoskeleton);05142(Chagas disease (American trypanosomiasis));05143(African trypanosomiasis);05200(Pathways in cancer);05200(Pathways in cancer)	K03898	NA	kininogen 1 [Source:RGD Symbol;Acc:1359376]	protein_coding	833.307	406.678	405.621	385.045	727.904	698.495	360.806	404.959	496.535	653.424	1223.68	1125.54	0.000349537	0.0123722	yes
ENSRNOG00000023465	Depp1	ENSRNOT00000018133	GO:0005737(cytoplasm);GO:0005739(mitochondrion);GO:0005777(peroxisome);GO:0010506(regulation of autophagy);GO:0043231(intracellular membrane-bounded organelle)	NA	NA	NA	DEPP1, autophagy regulator [Source:RGD Symbol;Acc:1565700]	protein_coding	92.5848	48.8348	49.6005	74.5711	36.231	53.0194	48.3139	93.5489	71.1865	21.372	36.2967	23.6232	9.24851e-05	0.00443643	yes
ENSRNOG00000016456	Il33	ENSRNOT00000022056	GO:0000122(negative regulation of transcription by RNA polymerase II);GO:0002112(interleukin-33 receptor binding);GO:0002281(macrophage activation involved in immune response);GO:0002282(microglial cell activation involved in immune response);GO:0002686(negative regulation of leukocyte migration);GO:0002826(negative regulation of T-helper 1 type immune response);GO:0002830(positive regulation of …	04060(Cytokine-cytokine receptor interaction);04217(Necroptosis);04623(Cytosolic DNA-sensing pathway);05164(Influenza A)	K12967	NA	interleukin 33 [Source:RGD Symbol;Acc:1311155]	protein_coding	16.504	14.6703	17.3671	19.6311	15.0504	26.7338	11.0562	13.0311	10.3296	20.1645	25.0619	42.8558	2.65929e-06	0.000229437	yes
ENSRNOG00000000036	Klhdc8a	ENSRNOT00000000041	GO:0005515(protein binding)	NA	NA	NA	kelch domain containing 8A [Source:RGD Symbol;Acc:1305132]	protein_coding	1.77941	2.17027	2.56428	3.8562	3.65951	2.1293	3.89585	3.39101	4.15795	1.33779	1.05056	1.95279	9.15536e-06	0.000653714	yes
ENSRNOG00000059579	Gpt2	ENSRNOT00000077275;ENSRNOT00000078348	GO:0003824(catalytic activity);GO:0004021(L-alanine:2-oxoglutarate aminotransferase activity);GO:0005615(extracellular space);GO:0005739(mitochondrion);GO:0006103(2-oxoglutarate metabolic process);GO:0009058(biosynthetic process);GO:0030170(pyridoxal phosphate binding);GO:0032869(cellular response to insulin stimulus);GO:0033574(response to testosterone);GO:0042594(response to starvation);GO:0042…	00220(Arginine biosynthesis);00250(Alanine, aspartate and glutamate metabolism);00250(Alanine, aspartate and glutamate metabolism)	K00814	EC:2.6.1.2	glutamic--pyruvic transaminase 2 [Source:RGD Symbol;Acc:1305462]	protein_coding	31.4553	34.7686	27.8119	28.6256	37.8097	38.5108	29.164	25.1978	23.2256	60.1986	50.6971	50.0116	4.82895e-07	5.08432e-05	yes
ENSRNOG00000010813	Tspan14	ENSRNOT00000014772	GO:0005886(plasma membrane);GO:0005887(integral component of plasma membrane);GO:0009986(cell surface);GO:0016020(membrane);GO:0016021(integral component of membrane);GO:0019899(enzyme binding);GO:0045747(positive regulation of Notch signaling pathway);GO:0051604(protein maturation);GO:0072659(protein localization to plasma membrane);GO:0097197(tetraspanin-enriched microdomain)	NA	K17296	NA	tetraspanin 14 [Source:RGD Symbol;Acc:1305714]	protein_coding	21.8768	24.4646	20.1756	20.6843	28.343	25.0617	24.9757	23.6874	18.7651	10.2089	11.4473	8.65498	3.46553e-09	6.5236e-07	yes
ENSRNOG00000023778	Gcnt2	ENSRNOT00000060335;ENSRNOT00000035448;ENSRNOT00000078010	GO:0000139(Golgi membrane);GO:0003674(molecular_function);GO:0005575(cellular_component);GO:0005794(Golgi apparatus);GO:0006486(protein glycosylation);GO:0007179(transforming growth factor beta receptor signaling pathway);GO:0008109(N-acetyllactosaminide beta-1,6-N-acetylglucosaminyltransferase activity);GO:0008150(biological_process);GO:0008284(positive regulation of cell population proliferatio…	00601(Glycosphingolipid biosynthesis - lacto and neolacto series);00601(Glycosphingolipid biosynthesis - lacto and neolacto series)	K00742	EC:2.4.1.150	glucosaminyl (N-acetyl) transferase 2 (I blood group) [Source:RGD Symbol;Acc:1303198]	protein_coding	0.665341	0.494095	0.868113	0.677685	0.51305	1.0168	0.775927	0.778845	0.821862	1.11595	3.12394	4.44911	5.84409e-10	1.32013e-07	yes
ENSRNOG00000023657	Gprin3	ENSRNOT00000039316	NA	NA	NA	NA	GPRIN family member 3 [Source:RGD Symbol;Acc:1565690]	protein_coding	1.13258	1.58594	1.68901	1.27734	1.45057	2.30307	0.887438	1.08287	0.479459	2.35583	2.87323	3.4744	4.9333e-06	0.00038792	yes
ENSRNOG00000013737	Bcar3	ENSRNOT00000065111	GO:0001784(phosphotyrosine residue binding);GO:0002089(lens morphogenesis in camera-type eye);GO:0005085(guanyl-nucleotide exchange factor activity);GO:0005515(protein binding);GO:0005737(cytoplasm);GO:0005925(focal adhesion);GO:0007165(signal transduction);GO:0007264(small GTPase mediated signal transduction);GO:0008286(insulin receptor signaling pathway);GO:0019900(kinase binding);GO:0030054(ce…	NA	NA	NA	BCAR3 adaptor protein, NSP family member [Source:RGD Symbol;Acc:1311688]	protein_coding	2.84195	2.626	3.85949	3.49335	3.22137	1.96853	4.5118	3.8641	3.2823	8.36933	10.6371	7.66895	1.48439e-13	6.35933e-11	yes
ENSRNOG00000020698	Rnd2	ENSRNOT00000028089	GO:0003924(GTPase activity);GO:0005515(protein binding);GO:0005525(GTP binding);GO:0005737(cytoplasm);GO:0005769(early endosome);GO:0005856(cytoskeleton);GO:0005886(plasma membrane);GO:0005938(cell cortex);GO:0007015(actin filament organization);GO:0007264(small GTPase mediated signal transduction);GO:0008360(regulation of cell shape);GO:0016477(cell migration);GO:0019901(protein kinase binding);…	NA	K07858	NA	Rho family GTPase 2 [Source:RGD Symbol;Acc:1306172]	protein_coding	22.6485	12.2429	22.2149	21.3057	13.3567	16.2907	20.4557	16.059	18.7953	32.339	36.8908	49.3087	6.35667e-07	6.58128e-05	yes
ENSRNOG00000000955	Lnx2	ENSRNOT00000001263	GO:0005515(protein binding);GO:0030165(PDZ domain binding);GO:0042802(identical protein binding);GO:0046872(metal ion binding)	NA	K10692	EC:2.3.2.27	ligand of numb-protein X 2 [Source:RGD Symbol;Acc:1308222]	protein_coding	6.29873	5.84656	5.7822	4.81836	5.60606	4.92699	5.16042	4.96828	4.50277	2.64133	2.12131	2.25079	5.53672e-11	1.63782e-08	yes
ENSRNOG00000011815	Sgk1	ENSRNOT00000016121;ENSRNOT00000061157;ENSRNOT00000040736;ENSRNOT00000083452	GO:0000166(nucleotide binding);GO:0004672(protein kinase activity);GO:0004674(protein serine/threonine kinase activity);GO:0004712(protein serine/threonine/tyrosine kinase activity);GO:0005524(ATP binding);GO:0005829(cytosol);GO:0006468(protein phosphorylation);GO:0006974(cellular response to DNA damage stimulus);GO:0016301(kinase activity);GO:0016310(phosphorylation);GO:0016607(nuclear speck);GO…	04068(FoxO signaling pathway);04150(mTOR signaling pathway);04151(PI3K-Akt signaling pathway);04960(Aldosterone-regulated sodium reabsorption);04960(Aldosterone-regulated sodium reabsorption)	K13302	EC:2.7.11.1	serum/glucocorticoid regulated kinase 1 [Source:RGD Symbol;Acc:3668]	protein_coding	5.42088	8.03791	14.6198	10.0765	6.02463	8.01773	29.7286	17.4319	12.0556	6.48466	7.28305	8.11825	1.24931e-05	0.000857539	yes
ENSRNOG00000011875	Slc2a2	ENSRNOT00000015866;ENSRNOT00000091221	GO:0005353(fructose transmembrane transporter activity);GO:0005355(glucose transmembrane transporter activity);GO:0005737(cytoplasm);GO:0005886(plasma membrane);GO:0005903(brush border);GO:0005911(cell-cell junction);GO:0008643(carbohydrate transport);GO:0015755(fructose transmembrane transport);GO:0016020(membrane);GO:0016021(integral component of membrane);GO:0016324(apical plasma membrane);GO:…	04911(Insulin secretion);04917(Prolactin signaling pathway);04922(Glucagon signaling pathway);04930(Type II diabetes mellitus);04931(Insulin resistance);04950(Maturity onset diabetes of the young);04973(Carbohydrate digestion and absorption);05230(Central carbon metabolism in cancer);05230(Central carbon metabolism in cancer)	K07593	NA	solute carrier family 2 member 2 [Source:RGD Symbol;Acc:3705]	protein_coding	60.4046	68.8853	62.2016	67.7697	72.26	69.0878	58.398	49.2006	38.2947	92.5671	130.307	100.581	6.27271e-07	6.54892e-05	yes
ENSRNOG00000005302	Slc2a9	ENSRNOT00000085275;ENSRNOT00000042200	GO:0005355(glucose transmembrane transporter activity);GO:0005635(nuclear envelope);GO:0005886(plasma membrane);GO:0005887(integral component of plasma membrane);GO:0015143(urate transmembrane transporter activity);GO:0015747(urate transport);GO:0015755(fructose transmembrane transport);GO:0016020(membrane);GO:0016021(integral component of membrane);GO:0016323(basolateral plasma membrane);GO:0016…	NA	K08146	NA	solute carrier family 2 member 9 [Source:RGD Symbol;Acc:1597012]	protein_coding	8.96813	8.89694	7.43954	8.13199	7.48286	10.3699	7.7211	8.0504	7.78815	14.6804	16.2701	16.3248	2.93668e-08	4.56066e-06	yes
ENSRNOG00000006588	Meox2	ENSRNOT00000008803	GO:0000978(RNA polymerase II cis-regulatory region sequence-specific DNA binding);GO:0000981(DNA-binding transcription factor activity, RNA polymerase II-specific);GO:0001228(DNA-binding transcription activator activity, RNA polymerase II-specific);GO:0001525(angiogenesis);GO:0001757(somite specification);GO:0003677(DNA binding);GO:0003700(DNA-binding transcription factor activity);GO:0005634(nuc…	NA	NA	NA	mesenchyme homeobox 2 [Source:RGD Symbol;Acc:3079]	protein_coding	0.703279	1.64428	0.738475	1.531	1.43404	1.16306	1.02299	0.916066	0.577268	1.8717	2.92263	4.57527	2.15864e-06	0.000190227	yes
ENSRNOG00000020281	Kif22	ENSRNOT00000027525	GO:0000166(nucleotide binding);GO:0000785(chromatin);GO:0003677(DNA binding);GO:0003777(microtubule motor activity);GO:0005524(ATP binding);GO:0005634(nucleus);GO:0005737(cytoplasm);GO:0005819(spindle);GO:0005829(cytosol);GO:0005856(cytoskeleton);GO:0005871(kinesin complex);GO:0005874(microtubule);GO:0006281(DNA repair);GO:0007018(microtubule-based movement);GO:0007062(sister chromatid cohesion);…	04914(Progesterone-mediated oocyte maturation)	K10403	NA	kinesin family member 22 [Source:RGD Symbol;Acc:1311886]	protein_coding	0.339329	0.149214	0.10966	0.117583	0.0001	0.074842	0.36107	0.611743	0.670981	0.01801	0.121878	0.031507	0.000560064	0.0174392	yes
ENSRNOG00000029980	Zbtb16	ENSRNOT00000045356	GO:0000122(negative regulation of transcription by RNA polymerase II);GO:0000978(RNA polymerase II cis-regulatory region sequence-specific DNA binding);GO:0001227(DNA-binding transcription repressor activity, RNA polymerase II-specific);GO:0001501(skeletal system development);GO:0001823(mesonephros development);GO:0003676(nucleic acid binding);GO:0003677(DNA binding);GO:0003690(double-stranded DN…	05200(Pathways in cancer);05202(Transcriptional misregulation in cancer);05221(Acute myeloid leukemia)	K10055	NA	zinc finger and BTB domain containing 16 [Source:RGD Symbol;Acc:727921]	protein_coding	2.04237	12.3008	1.76429	5.42894	9.2545	14.5682	0.850099	1.05672	2.85675	7.11579	3.37326	7.72399	0.000425911	0.0141107	yes
ENSRNOG00000020194	Hes6	ENSRNOT00000066346;ENSRNOT00000086678	GO:0000122(negative regulation of transcription by RNA polymerase II);GO:0000977(RNA polymerase II regulatory region sequence-specific DNA binding);GO:0001227(DNA-binding transcription repressor activity, RNA polymerase II-specific);GO:0003677(DNA binding);GO:0003700(DNA-binding transcription factor activity);GO:0003712(transcription coregulator activity);GO:0005634(nucleus);GO:0005667(transcript…	05165(Human papillomavirus infection);05165(Human papillomavirus infection)	K09087	NA	hes family bHLH transcription factor 6 [Source:RGD Symbol;Acc:1312047]	protein_coding	12.057	12.1194	13.2891	10.0727	11.3327	11.072	18.394	12.5416	13.279	32.174	50.2321	26.6023	2.58294e-15	1.39524e-12	yes
ENSRNOG00000009076	Ttpal	ENSRNOT00000012606	GO:1902936(phosphatidylinositol bisphosphate binding)	NA	NA	NA	alpha tocopherol transfer protein like [Source:RGD Symbol;Acc:1305754]	protein_coding	2.82172	4.60888	3.59626	5.0807	8.27546	3.56974	5.11094	3.83074	4.98788	2.64859	1.53051	1.96507	1.71604e-05	0.00114011	yes
ENSRNOG00000006622	Cry1	ENSRNOT00000009124	GO:0000122(negative regulation of transcription by RNA polymerase II);GO:0000166(nucleotide binding);GO:0003690(double-stranded DNA binding);GO:0005634(nucleus);GO:0005737(cytoplasm);GO:0005739(mitochondrion);GO:0006094(gluconeogenesis);GO:0006975(DNA damage induced protein phosphorylation);GO:0007623(circadian rhythm);GO:0008134(transcription factor binding);GO:0009416(response to light stimulus…	04710(Circadian rhythm)	K02295	NA	cryptochrome circadian regulator 1 [Source:RGD Symbol;Acc:735083]	protein_coding	4.96965	4.73052	4.37588	5.42416	4.1487	4.28432	2.84988	2.64557	1.96053	0.897521	0.954914	0.808056	1.77166e-23	2.75138e-20	yes
ENSRNOG00000003538	Adamts4	ENSRNOT00000004713	GO:0002020(protease binding);GO:0004222(metalloendopeptidase activity);GO:0005576(extracellular region);GO:0005615(extracellular space);GO:0006508(proteolysis);GO:0008233(peptidase activity);GO:0008237(metallopeptidase activity);GO:0016607(nuclear speck);GO:0016787(hydrolase activity);GO:0046872(metal ion binding)	NA	K07764	EC:3.4.24.82	ADAM metallopeptidase with thrombospondin type 1 motif, 4 [Source:RGD Symbol;Acc:621242]	protein_coding	0.377183	0.508164	0.467364	0.354121	0.433432	0.548366	0.268577	0.422633	0.459349	0.100471	0.080439	0.050595	1.11466e-08	1.9505e-06	yes
ENSRNOG00000010589	Zfp622	ENSRNOT00000089551;ENSRNOT00000063951;ENSRNOT00000066879;ENSRNOT00000089805	GO:0003676(nucleic acid binding);GO:0005634(nucleus);GO:0005737(cytoplasm);GO:0005783(endoplasmic reticulum);GO:0005789(endoplasmic reticulum membrane);GO:0005794(Golgi apparatus);GO:0005801(cis-Golgi network);GO:0006914(autophagy);GO:0008270(zinc ion binding);GO:0016020(membrane);GO:0016021(integral component of membrane);GO:0019233(sensory perception of pain);GO:0030176(integral component of en…	NA	K14816	NA	zinc finger protein 622 [Source:RGD Symbol;Acc:1309146]	protein_coding	3.64197	8.99563	5.43417	4.84065	6.4826	6.68729	3.85025	4.05338	3.55485	6.81839	6.84291	9.90424	0.00318339	0.0627785	yes
ENSRNOG00000018198	Dapk1	ENSRNOT00000066950;ENSRNOT00000080750	GO:0000166(nucleotide binding);GO:0004672(protein kinase activity);GO:0004674(protein serine/threonine kinase activity);GO:0004683(calmodulin-dependent protein kinase activity);GO:0005515(protein binding);GO:0005516(calmodulin binding);GO:0005524(ATP binding);GO:0005525(GTP binding);GO:0005634(nucleus);GO:0005737(cytoplasm);GO:0005886(plasma membrane);GO:0006468(protein phosphorylation);GO:000691…	04140(Autophagy - animal);05200(Pathways in cancer);05219(Bladder cancer);05219(Bladder cancer)	K08803	EC:2.7.11.1	death associated protein kinase 1 [Source:RGD Symbol;Acc:1311629]	protein_coding	6.07877	6.16906	4.61674	3.9601	4.256	7.07826	4.55695	6.03346	5.92861	2.79075	1.52605	2.94671	4.10988e-05	0.00223104	yes
ENSRNOG00000051258	Taf9	ENSRNOT00000076061;ENSRNOT00000076484;ENSRNOT00000076434;ENSRNOT00000076294;ENSRNOT00000076372	GO:0000124(SAGA complex);GO:0000125(PCAF complex);GO:0000492(box C/D snoRNP assembly);GO:0000976(transcription regulatory region sequence-specific DNA binding);GO:0002039(p53 binding);GO:0003677(DNA binding);GO:0003713(transcription coactivator activity);GO:0004402(histone acetyltransferase activity);GO:0005515(protein binding);GO:0005575(cellular_component);GO:0005634(nucleus);GO:0005669(transcr…	03022(Basal transcription factors);03022(Basal transcription factors)	K14535	NA	TATA-box binding protein associated factor 9 [Source:RGD Symbol;Acc:727861]	protein_coding	3.15163	2.25373	3.2323	2.29157	4.40264	4.30227	1.95273	2.18476	1.40464	4.8342	3.50323	16.5711	7.53579e-06	0.000548095	yes
ENSRNOG00000019098	Ca5a	ENSRNOT00000025848	GO:0004089(carbonate dehydratase activity);GO:0005737(cytoplasm);GO:0005739(mitochondrion);GO:0006730(one-carbon metabolic process);GO:0008270(zinc ion binding);GO:0016829(lyase activity);GO:0016836(hydro-lyase activity);GO:0046872(metal ion binding)	00910(Nitrogen metabolism)	K01672	EC:4.2.1.1	carbonic anhydrase 5A [Source:RGD Symbol;Acc:2243]	protein_coding	22.054	17.6336	22.0603	30.8113	35.2124	27.7804	20.6785	24.6069	16.9143	42.9213	36.0975	59.4213	3.52018e-08	5.20651e-06	yes
ENSRNOG00000059753	Gys2	ENSRNOT00000090122	GO:0004373(glycogen (starch) synthase activity);GO:0005978(glycogen biosynthetic process);GO:0016740(transferase activity);GO:0016757(transferase activity, transferring glycosyl groups)	00500(Starch and sucrose metabolism);04151(PI3K-Akt signaling pathway);04152(AMPK signaling pathway);04910(Insulin signaling pathway);04922(Glucagon signaling pathway);04931(Insulin resistance)	K00693	EC:2.4.1.11	glycogen synthase 2 [Source:RGD Symbol;Acc:2773]	protein_coding	26.4166	23.6134	37.9587	28.9379	33.6447	27.6016	25.9343	28.1658	31.6175	40.7476	60.8232	98.7645	2.43157e-07	2.79721e-05	yes
ENSRNOG00000014066	Jade1	ENSRNOT00000018872	GO:0000123(histone acetyltransferase complex);GO:0003713(transcription coactivator activity);GO:0005634(nucleus);GO:0005737(cytoplasm);GO:0005829(cytosol);GO:0005886(plasma membrane);GO:0016607(nuclear speck);GO:0036064(ciliary basal body);GO:0043966(histone H3 acetylation);GO:0043981(histone H4-K5 acetylation);GO:0043982(histone H4-K8 acetylation);GO:0043983(histone H4-K12 acetylation);GO:004687…	NA	K11347	NA	jade family PHD finger 1 [Source:RGD Symbol;Acc:1306920]	protein_coding	3.34902	2.3223	2.09361	2.63513	2.28782	2.46885	2.9384	2.55147	2.19153	5.01086	5.53418	5.10151	3.20912e-08	4.92224e-06	yes
ENSRNOG00000045743	Etnppl	ENSRNOT00000074209	GO:0003824(catalytic activity);GO:0005739(mitochondrion);GO:0008483(transaminase activity);GO:0030170(pyridoxal phosphate binding);GO:0050459(ethanolamine-phosphate phospho-lyase activity)	00564(Glycerophospholipid metabolism)	K14286	EC:4.2.3.2	ethanolamine-phosphate phospho-lyase [Source:RGD Symbol;Acc:1590098]	protein_coding	39.3589	67.9453	42.4025	71.6593	80.8725	68.975	20.7055	23.0527	19.2663	50.0981	28.5442	77.2654	6.8765e-08	9.38832e-06	yes
ENSRNOG00000007478	Cry2	ENSRNOT00000010142	GO:0000976(transcription regulatory region sequence-specific DNA binding);GO:0005634(nucleus);GO:0005739(mitochondrion);GO:0005829(cytosol);GO:0006606(protein import into nucleus);GO:0007623(circadian rhythm);GO:0009416(response to light stimulus);GO:0009881(photoreceptor activity);GO:0014823(response to activity);GO:0016607(nuclear speck);GO:0016829(lyase activity);GO:0018298(protein-chromophore…	04710(Circadian rhythm)	K02295	NA	cryptochrome circadian regulator 2 [Source:RGD Symbol;Acc:620935]	protein_coding	6.08244	6.83469	5.50284	5.75244	4.80518	5.23976	6.70777	4.73509	4.16907	9.65487	12.7692	11.3741	3.48223e-08	5.20651e-06	yes
ENSRNOG00000028668	Slc28a2	ENSRNOT00000036435;ENSRNOT00000024658	GO:0005326(neurotransmitter transmembrane transporter activity);GO:0005337(nucleoside transmembrane transporter activity);GO:0005345(purine nucleobase transmembrane transporter activity);GO:0005415(nucleoside:sodium symporter activity);GO:0005887(integral component of plasma membrane);GO:0006836(neurotransmitter transport);GO:0015211(purine nucleoside transmembrane transporter activity);GO:001521…	NA	K11536	NA	solute carrier family 28 member 2 [Source:RGD Symbol;Acc:61840]	protein_coding	19.3372	25.7076	22.4399	16.4323	25.3344	45.5339	41.5888	38.1986	27.8748	21.2278	16.1234	14.4053	0.00219406	0.0480758	yes
ENSRNOG00000004067	Nrcam	ENSRNOT00000083088;ENSRNOT00000085979;ENSRNOT00000093195;ENSRNOT00000091677;ENSRNOT00000051908;ENSRNOT00000050222;ENSRNOT00000093255;ENSRNOT00000093147;ENSRNOT00000059739;ENSRNOT00000078583;ENSRNOT00000082793;ENSRNOT00000093290;ENSRNOT00000093300;ENSRNOT00000093241	GO:0001525(angiogenesis);GO:0005515(protein binding);GO:0005886(plasma membrane);GO:0007155(cell adhesion);GO:0007411(axon guidance);GO:0007417(central nervous system development);GO:0008104(protein localization);GO:0010975(regulation of neuron projection development);GO:0016020(membrane);GO:0016021(integral component of membrane);GO:0019227(neuronal action potential propagation);GO:0030424(axon)…	04514(Cell adhesion molecules (CAMs));04514(Cell adhesion molecules (CAMs))	K06756	NA	neuronal cell adhesion molecule [Source:RGD Symbol;Acc:3209]	protein_coding;processed_transcript;retained_intron	0.0508884	0.160192	0.279826	0.133142	0.378246	0.256412	0.114123	0.122896	0.197352	0.63282	0.391305	0.466317	0.00132758	0.0337297	yes
ENSRNOG00000058589	AABR07046778	ENSRNOT00000084749	GO:0008137(NADH dehydrogenase (ubiquinone) activity);GO:0016020(membrane);GO:0016021(integral component of membrane);GO:0016651(oxidoreductase activity, acting on NAD(P)H);GO:0030964(NADH dehydrogenase complex);GO:0031966(mitochondrial membrane);GO:0042773(ATP synthesis coupled electron transport);GO:0055114(oxidation-reduction process)	NA	NA	NA	0	protein_coding	57.2648	360.706	51.5585	391.011	338.466	52.5935	65.8477	96.9789	242.767	270.436	519.745	463.966	0.0466052	0.337788	yes
ENSRNOG00000009712	Gale	ENSRNOT00000013322;ENSRNOT00000084085	GO:0003974(UDP-N-acetylglucosamine 4-epimerase activity);GO:0003978(UDP-glucose 4-epimerase activity);GO:0005975(carbohydrate metabolic process);GO:0006012(galactose metabolic process);GO:0016853(isomerase activity);GO:0019388(galactose catabolic process);GO:0042802(identical protein binding);GO:0042803(protein homodimerization activity);GO:0042803(protein homodimerization activity)	00052(Galactose metabolism);00520(Amino sugar and nucleotide sugar metabolism);00520(Amino sugar and nucleotide sugar metabolism)	K01784	EC:5.1.3.2	UDP-galactose-4-epimerase [Source:RGD Symbol;Acc:621493]	protein_coding	3.48994	2.94385	3.3726	4.08033	5.21976	3.43142	5.96676	5.42161	5.53268	2.44259	2.43883	2.16639	1.53238e-05	0.0010291	yes
ENSRNOG00000002052	Ccdc80	ENSRNOT00000059735;ENSRNOT00000093233	GO:0001968(fibronectin binding);GO:0005539(glycosaminoglycan binding);GO:0005576(extracellular region);GO:0005604(basement membrane);GO:0005614(interstitial matrix);GO:0008201(heparin binding);GO:0009617(response to bacterium);GO:0010811(positive regulation of cell-substrate adhesion);GO:0030198(extracellular matrix organization);GO:0031012(extracellular matrix);GO:0031012(extracellular matrix)	NA	NA	NA	coiled-coil domain containing 80 [Source:RGD Symbol;Acc:69421]	protein_coding;retained_intron	7.8969	8.94031	15.7796	8.43091	4.98877	9.13671	10.0627	11.872	17.6606	5.69784	6.00645	7.60317	0.000848919	0.0233857	yes
ENSRNOG00000018815	Plk1	ENSRNOT00000025629	GO:0000070(mitotic sister chromatid segregation);GO:0000086(G2/M transition of mitotic cell cycle);GO:0000122(negative regulation of transcription by RNA polymerase II);GO:0000132(establishment of mitotic spindle orientation);GO:0000166(nucleotide binding);GO:0000278(mitotic cell cycle);GO:0000281(mitotic cytokinesis);GO:0000287(magnesium ion binding);GO:0000775(chromosome, centromeric region);GO…	04068(FoxO signaling pathway);04110(Cell cycle);04114(Oocyte meiosis);04914(Progesterone-mediated oocyte maturation)	K06631	EC:2.7.11.21	polo-like kinase 1 [Source:RGD Symbol;Acc:3352]	protein_coding	0.200469	0.23731	0.168804	0.0001	0.052681	0.229566	0.519267	0.325188	0.471076	0.107225	0.073871	0.049135	0.0179714	0.197241	yes
ENSRNOG00000053448	AC123346	ENSRNOT00000077603	GO:0005507(copper ion binding);GO:0005769(early endosome);GO:0005783(endoplasmic reticulum);GO:0005794(Golgi apparatus);GO:0005886(plasma membrane);GO:0008131(primary amine oxidase activity);GO:0008537(proteasome activator complex);GO:0009308(amine metabolic process);GO:0016491(oxidoreductase activity);GO:0046677(response to antibiotic);GO:0046872(metal ion binding);GO:0048038(quinone binding);GO…	NA	NA	NA	0	nonsense_mediated_decay	15.7977	10.4854	10.4579	12.4233	12.4801	9.3787	9.09372	19.1628	4.60987	0.61455	1.76423	4.02439	3.25615e-06	0.000271506	yes
ENSRNOG00000005413	Creb3l1	ENSRNOT00000007771	GO:0000122(negative regulation of transcription by RNA polymerase II);GO:0000790(nuclear chromatin);GO:0000976(transcription regulatory region sequence-specific DNA binding);GO:0001227(DNA-binding transcription repressor activity, RNA polymerase II-specific);GO:0001228(DNA-binding transcription activator activity, RNA polymerase II-specific);GO:0001649(osteoblast differentiation);GO:0003674(molec…	04022(cGMP-PKG signaling pathway);04024(cAMP signaling pathway);04151(PI3K-Akt signaling pathway);04152(AMPK signaling pathway);04211(Longevity regulating pathway);04261(Adrenergic signaling in cardiomyocytes);04668(TNF signaling pathway);04714(Thermogenesis);04725(Cholinergic synapse);04728(Dopaminergic synapse);04911(Insulin secretion);04915(Estrogen signaling pathway);04916(Melanogenesis);0491…	K09048	NA	cAMP responsive element binding protein 3-like 1 [Source:RGD Symbol;Acc:1359613]	protein_coding	1.49805	2.58392	1.96542	2.13491	1.64909	2.86235	2.83498	2.18061	3.06228	1.25015	0.90411	0.96005	0.000161427	0.00689197	yes
[truncated: 223 more rows]

## Sheet: kegg of DEGs respond to LTA in 
kegg of DEGs in response to LTA under HS (genes that were screened in the former sheet)
[truncated: 228 more rows]
