# Supplementary material for: l-Theanine attenuates heat stress-induced proteotoxicity and alterations in carbohydrate and lipid metabolismviaheat shock factor 1
Source: Royal Society of Chemistry journal article supplement (doi:10.1039/d3fo01001e), 2023-01-01
Supplement: d3fo01001e2.xlsx [file d3fo01001e2.xlsx]

## Sheet: DMs (HS vs. Control)
Differential metabolites (DMs) screened from HS vs. Control(screening criteria: VIP ≥ 1, FC ≥ 1.2 or ≤ 0.83 and p < 0.05)
Metabolite ID	Fold Change	pvalue	qvalue	VIP	Sample	Ion Mode	RT	Molecular Weight	Formula	Name	Delta Mass Da	Delta Mass ppm	Match	Level	Database	KEGG ID	HMDB ID	Super Class	Sub Class	Class	Final Class	Super Pathway	Sub Pathway	Pathway	State	Control-1	Contro-3	Contro-6	Contro-2	Contro-4	Contro-5	HS-5	HS-1	HS-2	HS-3	HS-4	HS-6
0.682_131.06950	0.558657	0.0146252	0.276631	1.05189	HS:Control	POS	0.682	131.07	C4 H6 N2 O2	5,6-dihydrouracil	NA	17.0266	149300	level1	BMDB	C00429	HMDB0000076	Organoheterocyclic compounds	Pyrimidines and pyrimidine derivatives	Diazines	Organoheterocyclic compounds	Nucleotide metabolism	Pyrimidine metabolism	map00240 Pyrimidine metabolism; map00410 beta-Alanine metabolism; map00770 Pantothenate and CoA biosynthesis; map01100 Metabolic pathways	Down	4.22287e+08	9.53937e+08	9.38172e+08	6.29561e+08	6.85798e+08	5.69149e+08	1.91113e+08	2.87883e+08	4.52672e+08	4.98254e+08	4.24661e+08	4.91165e+08
5.412_144.11515	0.163624	0.0406931	0.277575	1.81057	HS:Control	POS	5.412	144.115	C4 H8 O	2-METHYLPROPANAL	NA	72.0576	1e+06	level1	BMDB	C03219	HMDB0031243	Organic oxygen compounds	Carbonyl compounds	Organooxygen compounds	Organic oxygen compounds	Metabolism of other amino acids	Cyanoamino acid metabolism	map00460 Cyanoamino acid metabolism; map00966 Glucosinolate biosynthesis; map01100 Metabolic pathways; map01110 Biosynthesis of secondary metabolites; map01210 2-Oxocarboxylic acid metabolism	Down	1.39282e+07	5.37482e+06	452333	907536	2.36751e+06	731287	684715	2.43912e+06	93812.1	514669	133093	22562.2
6.705_385.24648	76.4715	0.0336627	0.276631	2.35947	HS:Control	POS	6.705	385.246	C20 H32 O6	11-Dehydro thromboxane B2	NA	17.0266	46240.3	level2	mzCloud	C05964	HMDB0004242	Lipids and lipid-like molecules	Eicosanoids	Fatty Acyls	Fatty acyls[FA]	Lipid metabolism	Arachidonic acid metabolism	map00590 Arachidonic acid metabolism; map01100 Metabolic pathways; map04726 Serotonergic synapse	Up	48945.8	75369.7	186588	52436.9	55895.4	57219.8	49056.8	3.00035e+06	7.61012e+06	64981.1	8.3836e+06	1.73271e+07
7.174_288.17257	13.7469	0.00984265	0.276631	2.05824	HS:Control	POS	7.174	288.173	C16 H26 O3	Tetranor-12(S)-HETE	NA	21.9844	82589.6	level2	mzCloud	NA	HMDB0060055	Lipids and lipid-like molecules	Fatty acids and conjugates	Fatty Acyls	Fatty acyls[FA]	NA	NA	NA	Up	183027	241540	211867	647128	362436	211727	487127	2.72804e+06	3.53008e+06	457015	6.2725e+06	1.20631e+07
8.339_353.25663	25.4958	0.0338472	0.276631	2.10834	HS:Control	POS	8.339	353.257	C20 H32 O4	15-epi Prostaglandin A1	NA	17.0266	50639.6	level2	mzCloud	NA	NA	NA	NA	NA	NA	NA	NA	NA	Up	149005	517790	693679	266846	136013	495613	270939	9.12466e+06	1.36495e+07	233421	1.30445e+07	2.12707e+07
9.885_592.47071	24.864	0.026597	0.276631	2.01946	HS:Control	NEG	9.885	592.471	C18 H32 O3	(+/-)9(10)-EpOME	NA	296.236	1e+06	level2	mzCloud	NA	NA	NA	NA	NA	NA	NA	NA	NA	Up	62367.2	36188.4	35943.1	61405.2	56085.9	47176	80948.5	417431	1.58328e+06	49967.1	507415	4.79942e+06
0.641_125.01464	0.522321	0.0309127	0.276631	1.25414	HS:Control	NEG	0.641	125.015	C2 H7 N O3 S	Taurine	NA	-2.63157e-05	-0.210501	level3	mzCloud	C00245	HMDB0000251	Organic acids and derivatives	Organosulfonic acids and derivatives	Organic sulfonic acids and derivatives	Organic acids	Lipid metabolism	Primary bile acid biosynthesis	map00120 Primary bile acid biosynthesis; map00430 Taurine and hypotaurine metabolism; map00920 Sulfur metabolism; map01100 Metabolic pathways; map02010 ABC transporters; map04080 Neuroactive ligand-receptor interaction	Down	1.20485e+08	1.25929e+08	1.37261e+08	2.51319e+08	1.35758e+08	1.18444e+08	5.46089e+07	2.57409e+07	5.74124e+07	1.92266e+08	8.84134e+07	4.60052e+07
0.655_86.03678	0.525351	0.0456781	0.283357	1.07311	HS:Control	POS	0.655	86.0368	C4 H6 O2	Crotonic acid	NA	-1.18842e-06	-0.013813	level3	mzCloud	C01771	HMDB0010720	Lipids and lipid-like molecules	Fatty acids and conjugates	Fatty Acyls	Fatty acyls[FA]	NA	NA	NA	Down	1.76014e+07	4.88247e+07	5.49802e+07	4.06798e+07	5.85675e+07	5.49127e+07	4.50813e+07	1.45694e+07	2.25476e+07	8.94068e+06	1.38004e+07	3.98298e+07
0.662_228.07418	2.54191	0.0263485	0.276631	1.33665	HS:Control	POS	0.662	228.074	C9 H12 N2 O5	Deoxyuridine	NA	-0.000442309	-1.93932	level3	BMDB	C00526	HMDB0000012	Nucleosides, nucleotides, and analogues	Pyrimidine 2'-deoxyribonucleosides	Pyrimidine nucleosides	Nucleic acids and analogues	Nucleotide metabolism	Pyrimidine metabolism	map00240 Pyrimidine metabolism; map01100 Metabolic pathways; map02010 ABC transporters	Up	283113	332911	1.62004e+06	425407	902892	458755	2.95975e+06	1.49729e+06	1.37228e+06	2.73371e+06	508237	1.15512e+06
0.688_202.09532	2.22756	0.045618	0.283357	1.26472	HS:Control	POS	0.688	202.095	C8 H16 N2 O5	2-Acetamido-2-deoxy-beta-D-glucosylamine	NA	-18.0106	-81827	level3	BMDB	NA	NA	NA	NA	NA	NA	NA	NA	NA	Up	1.28197e+06	3.21683e+06	5.02565e+06	998000	599170	1.09692e+06	1.17368e+06	5.45601e+06	4.0408e+06	7.01517e+06	4.83261e+06	4.6993e+06
1.155_182.04378	0.245085	0.0251657	0.276631	1.68114	HS:Control	NEG	1.155	182.044	C6 H6 N4 O3	9-Methyluric acid	NA	-0.000209376	-1.15014	level3	mzCloud	NA	HMDB0001973	Organoheterocyclic compounds	Purines and purine derivatives	Imidazopyrimidines	Purines and derivatives	NA	NA	NA	Down	2.71483e+06	9.50489e+06	3.71287e+06	2.14347e+06	1.41365e+06	1.43038e+06	842447	1.1339e+06	1.12248e+06	1.81772e+06	110056	100602
10.463_402.34984	3.72197	0.0269836	0.276631	1.37013	HS:Control	POS	10.463	402.35	C27 H44 O	Desmosterol	NA	18.0106	46861.3	level3	BMDB	C01802	HMDB0002719	Lipids and lipid-like molecules	Cholestane steroids	Steroids and steroid derivatives	Steroids and derivatives	Lipid metabolism	Steroid biosynthesis	map00100 Steroid biosynthesis; map01100 Metabolic pathways	Up	2.18406e+06	781664	1.34903e+06	1.78791e+06	1.70347e+06	2.00305e+06	1.95281e+06	4.0541e+06	6.74255e+06	2.00948e+06	3.77124e+06	1.79793e+07
3.034_169.07408	5.3685	0.0194107	0.276631	1.62274	HS:Control	POS	3.034	169.074	C8 H11 N O3	Pyridoxine	NA	0.000184181	1.08935	level3	BMDB	C00314	HMDB0000239	Organoheterocyclic compounds	Pyridoxines	Pyridines and derivatives	Pyridine and derivatives	Metabolism of cofactors and vitamins	Vitamin B6 metabolism	map00750 Vitamin B6 metabolism; map01100 Metabolic pathways; map01120 Microbial metabolism in diverse environments	Up	1.94818e+07	1.00278e+07	6.37193e+06	4.90107e+06	9.99998e+06	5.13739e+06	1.02701e+07	5.00433e+07	5.97408e+07	8.75589e+06	5.0305e+07	1.21091e+08
3.473_173.01483	0.181391	0.00409584	0.276631	1.96249	HS:Control	POS	3.473	173.015	C6 H7 N O3 S	ANILINE-2-SULFONATE	NA	0.000164749	0.952225	level3	BMDB	C06333	NA	NA	NA	NA	NA	Xenobiotics biodegradation and metabolism	Benzoate degradation	map00362 Benzoate degradation; map01120 Microbial metabolism in diverse environments	Down	1.573e+07	1.80767e+06	1.5776e+07	1.3511e+07	1.0148e+07	7.3464e+06	5.62788e+06	1.18044e+06	1.44898e+06	1.70615e+06	1.34439e+06	359053
3.488_297.08953	0.503453	0.0388417	0.277575	1.08488	HS:Control	POS	3.488	297.09	C11 H15 N5 O3 S	5'-methylthioadenosine	NA	-2.62831e-05	-0.0884685	level3	BMDB	C00170	HMDB0001173	Nucleosides, nucleotides, and analogues	5'-deoxy-5'-thionucleosides	5'-deoxyribonucleosides	Nucleic acids and analogues	Amino acid metabolism	Cysteine and methionine metabolism	map00270 Cysteine and methionine metabolism; map00908 Zeatin biosynthesis; map01060 Biosynthesis of plant secondary metabolites; map01100 Metabolic pathways	Down	7.6252e+06	6.057e+06	5.76918e+06	1.56262e+07	1.93183e+07	1.25641e+07	1.18165e+07	3.92166e+06	3.23733e+06	7.09433e+06	4.04703e+06	3.59435e+06
3.81_173.04781	2.20844	0.016125	0.276631	1.1905	HS:Control	POS	3.81	173.048	C10 H7 N O2	2-quinolinecarboxylic acid	NA	0.000130993	0.756978	level3	BMDB	C06325	HMDB0000842	Organoheterocyclic compounds	Quinoline carboxylic acids	Quinolines and derivatives	Organoheterocyclic compounds	NA	NA	NA	Up	1.18956e+06	2.45749e+06	2.31207e+06	1.119e+06	977526	1.0493e+06	3.21484e+06	1.62705e+06	4.1818e+06	5.14413e+06	1.65813e+06	4.28181e+06
5.196_197.10538	4.32785	0.0451477	0.283357	1.38343	HS:Control	POS	5.196	197.105	C10 H15 N O3	DL-Metanephrine	NA	0.000188433	0.956	level3	mzCloud	C05588	HMDB0062493	Benzenoids	Methoxyphenols	Phenols	Phenols and derivatives	Amino acid metabolism	Tyrosine metabolism	map00350 Tyrosine metabolism; map01100 Metabolic pathways	Up	290503	271021	301443	230580	391788	372011	520469	1.30932e+06	538464	217509	2.35844e+06	3.09411e+06
5.364_116.08372	79.2986	0.0209038	0.276631	2.44723	HS:Control	NEG	5.364	116.084	C6 H12 O2	Hexanoic acid	NA	-1.40961e-05	-0.12143	level3	mzCloud	C01585	HMDB0000535	Lipids and lipid-like molecules	Fatty acids and conjugates	Fatty Acyls	Fatty acyls[FA]	NA	NA	NA	Up	4094.66	4010.04	4325.13	7158.65	6948.68	6919.2	6549.82	210121	288571	7775.24	476158	1.66387e+06
5.778_189.07912	0.331342	0.0105787	0.276631	1.40676	HS:Control	POS	5.778	189.079	C11 H11 N O2	Indole-3-methyl acetate	NA	0.000141745	0.749659	level3	BMDB	NA	HMDB0029738	Organoheterocyclic compounds	Indolyl carboxylic acids and derivatives	Indoles and derivatives	Indole and derivatives	NA	NA	NA	Down	2.16243e+06	1.26172e+06	1.17983e+06	1.93142e+06	5.70242e+06	4.12158e+06	1.67827e+06	504156	899677	1.12565e+06	674547	538249
6.725_112.08890	2.55617	0.0237886	0.276631	1.21025	HS:Control	POS	6.725	112.089	C7 H14 O2	Heptanoate	NA	-18.0105	-138436	level3	BMDB	C17714	HMDB0000666	Lipids and lipid-like molecules	Fatty acids and conjugates	Fatty Acyls	Fatty acyls[FA]	NA	NA	NA	Up	1.23496e+06	1.19778e+06	1.46654e+06	1.96791e+06	1.73158e+06	1.64946e+06	1.7863e+06	2.86755e+06	5.86212e+06	1.56283e+06	4.67517e+06	6.88605e+06
6.754_326.20988	17.573	0.0475845	0.28412	1.83113	HS:Control	NEG	6.754	326.21	C18 H30 O5	2,3-Dinor prostaglandin E1	NA	0.000558756	1.71288	level3	mzCloud	NA	NA	NA	NA	NA	NA	NA	NA	NA	Up	217852	299311	265714	197375	227050	194057	198994	2.40431e+06	3.65591e+06	143651	6.7391e+06	1.14841e+07
7.109_380.21890	10.9808	0.022428	0.276631	1.86943	HS:Control	POS	7.109	380.219	C21 H30 O5	Cortisol	NA	18.0096	49721.5	level3	mzCloud	C00735	HMDB0000063	Lipids and lipid-like molecules	Hydroxysteroids	Steroids and steroid derivatives	Steroids and derivatives	Lipid metabolism	Steroid hormone biosynthesis	map00140 Steroid hormone biosynthesis; map01100 Metabolic pathways; map04080 Neuroactive ligand-receptor interaction; map04927 Cortisol synthesis and secretion; map04934 Cushing syndrome; map04960 Aldosterone-regulated sodium reabsorption; map04976 Bile secretion; map05200 Pathways in cancer; map05215 Prostate cancer; map07225 Glucocorticoid and mineralocorticoid receptor agonists/antagonists	Up	412015	259134	422840	378118	424423	438185	467210	3.53531e+06	2.80184e+06	436261	7.36896e+06	1.10274e+07
7.427_352.22260	16.4473	0.0143493	0.276631	2.1378	HS:Control	POS	7.427	352.223	C20 H32 O5	15-keto Prostaglandin E1	NA	-0.00237673	-6.74775	level3	mzCloud	C04654	HMDB0001320	Lipids and lipid-like molecules	Eicosanoids	Fatty Acyls	Fatty acyls[FA]	NA	NA	NA	Up	6.44643e+06	6.85607e+06	9.8934e+06	1.66439e+06	4.50101e+06	3.61358e+06	6.57271e+06	1.01828e+08	1.005e+08	5.99666e+06	1.60611e+08	1.66838e+08
7.558_372.19159	4.62304	0.0153184	0.276631	1.581	HS:Control	POS	7.558	372.192	C22 H28 O5	Meprednisone	NA	-0.00208157	-5.59272	level3	mzCloud	D06673	NA	NA	NA	NA	NA	NA	NA	NA	Up	3.35118e+06	1.77653e+06	1.85552e+06	4.93678e+06	4.56694e+06	4.55604e+06	4.84042e+06	2.09148e+07	1.10841e+07	3.4893e+06	2.14387e+07	3.55153e+07
7.92_312.23010	40.9214	0.0281272	0.276631	2.23015	HS:Control	NEG	7.92	312.23	C18 H32 O4	(+/-)9-HpODE	NA	4.08793e-05	0.130927	level3	mzCloud	NA	NA	NA	NA	NA	NA	NA	NA	NA	Up	3.74904e+06	6.50492e+06	7.64713e+06	1.22105e+07	5.19e+06	6.33323e+06	5.59206e+06	2.06708e+08	2.75431e+08	6.84095e+06	4.44265e+08	7.6492e+08
7.95_336.23017	34.9094	0.042384	0.278833	2.10777	HS:Control	NEG	7.95	336.23	C20 H32 O4	5(S),15(S)-DiHETE	NA	0.000114223	0.339717	level3	mzCloud	NA	NA	NA	NA	NA	NA	NA	NA	NA	Up	697273	712846	1.20263e+06	326002	512489	886532	773301	2.19849e+07	2.4636e+07	287605	2.98999e+07	7.38475e+07
7.952_312.23026	36.6888	0.0126892	0.276631	2.41553	HS:Control	POS	7.952	312.23	C18 H30 O3	13(S)-HOTrE	NA	18.0108	61215.4	level3	mzCloud	C16316	NA	FA Fatty acyls	FA0200 Other Octadecanoids	FA02 Octadecanoids	Fatty acyls[FA]	Lipid metabolism	alpha-Linolenic acid metabolism	map00592 alpha-Linolenic acid metabolism	Up	585248	1.59206e+06	5.11325e+06	1.70766e+06	2.54227e+06	3.75907e+06	4.2412e+06	6.77719e+07	8.35104e+07	2.56406e+06	1.84555e+08	2.1868e+08
8.089_376.22338	9.59181	0.0321399	0.276631	1.779	HS:Control	POS	8.089	376.223	C22 H30 O4	Ferutinin	NA	18.009	50274.3	level3	mzCloud	NA	NA	NA	NA	NA	NA	NA	NA	NA	Up	843038	2.45345e+06	2.31961e+06	1.42443e+06	1.49849e+06	1.51109e+06	1.43671e+06	1.74671e+07	1.66225e+07	1.38303e+06	2.4242e+07	3.52474e+07
8.102_408.24901	14.0373	0.0189647	0.276631	1.98109	HS:Control	POS	8.102	408.249	C23 H34 O5	15-Deoxy-Δ12,14-prostaglandin J2-2-glycerol ester	NA	18.0084	46146.9	level3	mzCloud	NA	NA	NA	NA	NA	NA	NA	NA	NA	Up	398971	368819	435949	674118	709164	715130	679930	4.50865e+06	7.98987e+06	654526	1.39102e+07	1.86102e+07
8.117_274.19328	10.5881	0.0263742	0.276631	1.80904	HS:Control	POS	8.117	274.193	C18 H26 O2	19-Nortestosterone	NA	-3.2336e-06	-0.0117931	level3	mzCloud	C07254	HMDB0002725	Lipids and lipid-like molecules	Estrane steroids	Steroids and steroid derivatives	Steroids and derivatives	NA	NA	NA	Up	2.90108e+06	3.05855e+06	3.17771e+06	1.84238e+06	3.62846e+06	943365	2.2263e+06	2.17935e+07	2.92663e+07	2.59893e+06	3.83081e+07	7.04685e+07
8.131_332.23439	2.44803	0.0277259	0.276631	1.26991	HS:Control	POS	8.131	332.234	C21 H34 O4	Carbaprostacyclin	NA	-18.0113	-51424.8	level3	mzCloud	NA	NA	NA	NA	NA	NA	NA	NA	NA	Up	899520	2.63575e+06	2.82275e+06	1.8722e+06	588496	1.08054e+06	1.311e+06	5.89624e+06	2.65391e+06	3.25708e+06	4.22999e+06	6.88545e+06
8.131_567.28492	0.414898	0.0175021	0.276631	1.44473	HS:Control	NEG	8.131	567.285	C31 H43 N3 O8	Tanespimycin	NA	-18.0201	-30787.5	level3	mzCloud	D06650	NA	NA	NA	NA	NA	NA	NA	NA	Down	1.76149e+06	994990	1.37451e+06	3.12968e+06	2.28472e+06	2.7481e+06	1.09981e+06	362677	525470	2.40051e+06	365453	346626
8.145_292.20394	22.6611	0.024864	0.276631	2.08795	HS:Control	POS	8.145	292.204	C18 H28 O3	12-Oxo phytodienoic acid	NA	9.49247e-05	0.324858	level3	mzCloud	C01226	NA	FA Fatty acyls	FA0201 12-oxophytodienoic acid metabolites	FA02 Octadecanoids	Fatty acyls[FA]	Lipid metabolism	alpha-Linolenic acid metabolism	map00592 alpha-Linolenic acid metabolism; map01100 Metabolic pathways; map01110 Biosynthesis of secondary metabolites	Up	3.88666e+06	4.7093e+06	4.55792e+06	4.24774e+06	3.06342e+06	3.64074e+06	3.73454e+06	6.70983e+07	7.82135e+07	4.96532e+06	1.58027e+08	2.34225e+08
8.174_430.23314	2.81368	0.0346106	0.276631	1.20782	HS:Control	POS	8.174	430.233	C25 H34 O6	Ingenol-3-angelate	NA	-0.00239797	-5.57363	level3	mzCloud	D09393	NA	NA	NA	NA	NA	NA	NA	NA	Up	907426	838849	991531	1.53323e+06	1.61294e+06	1.6265e+06	1.54645e+06	3.23275e+06	1.96674e+06	1.48867e+06	3.00715e+06	9.89029e+06
8.241_340.26126	15.6426	0.0346279	0.276631	1.81707	HS:Control	POS	8.241	340.261	C20 H34 O3	15-OxoEDE	NA	18.0105	55889.6	level3	mzCloud	NA	NA	NA	NA	NA	NA	NA	NA	NA	Up	44050.5	37993.1	59308.4	55357.4	57783	60302	60867.8	256742	2.96657e+06	55184.7	1.1228e+06	462029
8.309_210.12577	3.53877	0.0120518	0.276631	1.47821	HS:Control	POS	8.309	210.126	C12 H18 O3	Jasmonic acid	NA	0.000177845	0.846377	level3	mzCloud	C08491	HMDB0032797	Lipids and lipid-like molecules	Lineolic acids and derivatives	Fatty Acyls	Fatty acyls[FA]	Lipid metabolism	alpha-Linolenic acid metabolism	map00592 alpha-Linolenic acid metabolism; map01060 Biosynthesis of plant secondary metabolites; map01070 Biosynthesis of plant hormones; map01100 Metabolic pathways; map01110 Biosynthesis of secondary metabolites; map04075 Plant hormone signal transduction	Up	7.80782e+06	1.08479e+07	1.03873e+07	1.18104e+07	1.14645e+07	1.1203e+07	1.10385e+07	2.52064e+07	2.45138e+07	2.71375e+07	6.05688e+07	7.6321e+07
8.32_138.10452	31.7997	0.0219991	0.276631	2.21845	HS:Control	POS	8.32	138.105	C9 H14 O	Isophorone	NA	5.10355e-05	0.369543	level3	mzCloud	C14743	HMDB0031195	Organic oxygen compounds	Carbonyl compounds	Organooxygen compounds	Organic oxygen compounds	NA	NA	NA	Up	3.10936e+06	4.22005e+06	4.84951e+06	7.80128e+06	4.44198e+06	5.37349e+06	5.3289e+06	1.14239e+08	1.5246e+08	5.69047e+06	2.35119e+08	4.34655e+08
8.324_334.21198	17.9128	0.0494366	0.286328	1.8071	HS:Control	POS	8.324	334.212	C20 H30 O4	Bicyclo prostaglandin E2	NA	-0.00243227	-7.27756	level3	mzCloud	NA	NA	NA	NA	NA	NA	NA	NA	NA	Up	8.58519e+06	1.30074e+07	1.37573e+07	1.66674e+07	9.82162e+06	1.14409e+07	1.11822e+07	2.63161e+08	3.00687e+07	1.23186e+07	4.20481e+08	5.75436e+08
8.518_296.23509	9.27301	0.0285087	0.276631	1.77315	HS:Control	NEG	8.518	296.235	C18 H32 O3	(+/-)13-HODE	NA	-5.46467e-05	-0.184471	level3	mzCloud	NA	NA	NA	NA	NA	NA	NA	NA	NA	Up	3.40096e+07	6.24545e+07	7.25673e+07	5.27895e+07	5.98236e+07	4.22674e+07	4.59172e+07	4.72951e+08	4.66216e+08	5.82444e+07	7.02344e+08	1.25797e+09
8.518_332.23353	15.0831	0.0442614	0.283357	1.941	HS:Control	NEG	8.518	332.234	C21 H32 O3	17α-Hydroxypregnenolone	NA	-0.00161094	-4.8488	level3	mzCloud	C05138	HMDB0000363	Lipids and lipid-like molecules	Pregnane steroids	Steroids and steroid derivatives	Steroids and derivatives	Lipid metabolism	Steroid hormone biosynthesis	map00140 Steroid hormone biosynthesis; map01100 Metabolic pathways; map04913 Ovarian steroidogenesis; map04927 Cortisol synthesis and secretion; map04934 Cushing syndrome	Up	9517.53	57473	73569.6	9873.24	10558.3	9295.38	22448.9	683953	514339	8370.07	323603	1.01574e+06
8.735_364.26154	5.11148	0.0293224	0.276631	1.56171	HS:Control	NEG	8.735	364.262	C22 H36 O4	Prostaglandin A1 ethyl ester	NA	0.00018328	0.503155	level3	mzCloud	NA	NA	NA	NA	NA	NA	NA	NA	NA	Up	2.87182e+06	6.03687e+06	6.52647e+06	4.15074e+06	1.94115e+06	1.81246e+06	4.45814e+06	3.78705e+07	2.4435e+07	2.61667e+06	1.72614e+07	3.26577e+07
8.769_348.22745	10.3235	0.0344246	0.276631	1.75164	HS:Control	POS	8.769	348.227	C21 H34 O5	β-Cortolone	NA	-18.0132	-49184	level3	mzCloud	NA	NA	NA	NA	NA	NA	NA	NA	NA	Up	1.49772e+06	1.85694e+06	2.43338e+06	1.92444e+06	1.17128e+06	1.68101e+06	1.98565e+06	1.42581e+07	1.66887e+07	1.35097e+06	1.70714e+07	5.77105e+07
8.974_306.21918	3.44477	0.0358729	0.276631	1.26701	HS:Control	POS	8.974	306.219	C19 H30 O3	11β-Hydroxyandrosterone	NA	-0.000313462	-1.02365	level3	mzCloud	C14606	HMDB0002984	Lipids and lipid-like molecules	Androstane steroids	Steroids and steroid derivatives	Steroids and derivatives	NA	NA	NA	Up	809714	1.04152e+06	570932	1.26027e+06	1.12526e+06	489474	1.21638e+06	1.90188e+06	3.49813e+06	687640	2.993e+06	7.95045e+06
9.497_280.16681	2.85601	0.0253632	0.276631	1.26448	HS:Control	POS	9.497	280.167	C16 H26 O5	13,14-dihydro-15-keto-tetranor Prostaglandin D2	NA	-18.0112	-60404.2	level3	mzCloud	NA	NA	NA	NA	NA	NA	NA	NA	NA	Up	189523	140986	324226	277066	293877	322635	641641	501459	635886	1.95438e+06	447258	241384
9.642_286.22978	0.197181	0.00305799	0.276631	1.9734	HS:Control	POS	9.642	286.23	C20 H30 O	Retinol	NA	0.000114127	0.398726	level3	BMDB	C00473	HMDB0000305	Lipids and lipid-like molecules	Retinoids	Prenol lipids	Prenol lipids[PR]	Metabolism of cofactors and vitamins	Retinol metabolism	map00830 Retinol metabolism; map01100 Metabolic pathways; map04977 Vitamin digestion and absorption	Down	2.47626e+09	1.25574e+09	8.88015e+08	4.2302e+08	5.36937e+08	9.26851e+08	3.74746e+08	6.59109e+07	1.11709e+08	5.68038e+08	9.15692e+07	7.10469e+07
9.647_316.23992	0.285307	0.00743819	0.276631	1.51713	HS:Control	POS	9.647	316.24	C21 H32 O2	Pregnenolone	NA	-0.000311863	-0.986157	level3	mzCloud	C01953	HMDB0000253	Lipids and lipid-like molecules	Pregnane steroids	Steroids and steroid derivatives	Steroids and derivatives	Lipid metabolism	Steroid hormone biosynthesis	map00140 Steroid hormone biosynthesis; map01100 Metabolic pathways; map04913 Ovarian steroidogenesis; map04925 Aldosterone synthesis and secretion; map04927 Cortisol synthesis and secretion; map04934 Cushing syndrome	Down	1.41134e+08	6.52744e+07	4.6082e+07	2.43795e+07	2.38509e+07	4.88781e+07	3.16791e+07	1.25443e+07	1.44724e+07	2.42743e+07	8.31639e+06	8.45658e+06
9.907_430.38061	0.367097	0.000784998	0.276631	1.54264	HS:Control	POS	9.907	430.381	C29 H50 O2	Alpha-tocopherol	NA	-0.000471141	-1.09471	level3	BMDB	C02477	HMDB0001893	Lipids and lipid-like molecules	Quinone and hydroquinone lipids	Prenol lipids	Quinone	Metabolism of cofactors and vitamins	Ubiquinone and other terpenoid-quinone biosynthesis	map00130 Ubiquinone and other terpenoid-quinone biosynthesis; map01060 Biosynthesis of plant secondary metabolites; map01100 Metabolic pathways; map01110 Biosynthesis of secondary metabolites; map04216 Ferroptosis; map04977 Vitamin digestion and absorption	Down	1.95394e+07	1.01948e+07	1.19569e+07	1.77573e+07	1.8932e+07	9.62544e+06	9.03042e+06	4.73262e+06	5.28455e+06	5.57079e+06	2.54797e+06	5.14032e+06
9.989_168.07874	6.4818	0.0467199	0.283802	1.55298	HS:Control	POS	9.989	168.079	C9 H10 O2	4'-Methoxyacetophenone	NA	18.0107	120017	level3	mzCloud	NA	HMDB0032570	Organic oxygen compounds	Carbonyl compounds	Organooxygen compounds	Organic oxygen compounds	NA	NA	NA	Up	3.00998e+06	1.84056e+06	2.54053e+06	1.16872e+06	1.59376e+06	2.79638e+06	1.12931e+06	1.39453e+07	1.10056e+07	3.16947e+06	1.05797e+07	4.41095e+07
0.638_198.94720	0.438833	0.0410177	0.277575	1.38476	HS:Control	NEG	0.638	198.947	C3 H6 Br N O4	bronopol	-0.000821229	-4.12786	NA	level4	ChemSpider	NA	NA	NA	NA	NA	NA	NA	NA	NA	Down	1.40058e+06	1.12382e+06	1.15704e+06	3.97606e+06	2.0102e+06	2.00009e+06	797495	139866	611353	2.32985e+06	828100	413555
0.649_304.91152	0.268708	0.0420332	0.27829	1.39008	HS:Control	POS	0.649	304.912	C9 H5 Cl I N O	Clioquinol	0.00108164	3.54742	NA	level4	ChemSpider	NA	NA	NA	NA	NA	NA	NA	NA	NA	Down	831824	999249	966754	6.14356e+06	6.16277e+06	4.46841e+06	714837	327755	676679	2.27701e+06	626898	636137
0.651_141.01924	0.320651	0.0110891	0.276631	1.65558	HS:Control	POS	0.651	141.019	C2 H8 N O4 P	phosphoethanolamine	0.000146742	1.04058	NA	level4	ChemSpider	NA	NA	NA	NA	NA	NA	NA	NA	NA	Down	6.42373e+06	5.33652e+06	7.58385e+06	1.35879e+07	9.35238e+06	1.3171e+07	3.20369e+06	1.37945e+06	2.67911e+06	7.92363e+06	522561	2.07339e+06
0.667_146.02134	3.03415	0.0428272	0.278946	1.24397	HS:Control	POS	0.667	146.021	C5 H6 O5	alpha-Ketoglutaric acid	-0.000180443	-1.23573	NA	level4	ChemSpider	NA	NA	NA	NA	NA	NA	NA	NA	NA	Up	2.21127e+06	5.28519e+06	7.44716e+06	6.39407e+06	4.41808e+06	2.06125e+06	3.07067e+06	1.53704e+07	1.38382e+07	5.03213e+06	1.96039e+07	2.74858e+07
0.668_254.13750	2.52768	0.040688	0.277575	1.36917	HS:Control	POS	0.668	254.137	C11 H18 N4 O3	Homoanserine	-0.000389152	-1.53126	NA	level4	ChemSpider	NA	NA	NA	NA	NA	NA	NA	NA	NA	Up	442600	863580	3.26767e+06	382341	371643	412313	562247	3.67078e+06	3.05581e+06	1.12774e+06	4.1849e+06	1.90779e+06
0.682_386.13526	9.11687	0.0190851	0.276631	1.8569	HS:Control	NEG	0.682	386.135	C21 H22 O7	Pteryxin	-0.00128938	-3.33917	NA	level4	ChemSpider	NA	NA	NA	NA	NA	NA	NA	NA	NA	Up	78990.7	83584.9	120367	117694	95881.2	106992	159778	860732	1.10648e+06	87429.4	1.28579e+06	2.00191e+06
0.685_165.04603	6.64481	0.0338504	0.276631	1.65407	HS:Control	NEG	0.685	165.046	C5 H11 N O3 S	4129939	6.46171e-05	0.39151	NA	level4	ChemSpider	NA	NA	NA	NA	NA	NA	NA	NA	NA	Up	5.4453e+06	7.5649e+06	1.18451e+07	3.78073e+06	3.43155e+06	2.95401e+06	5.75115e+06	6.56354e+07	6.82287e+07	3.63344e+06	3.93424e+07	5.01209e+07
0.69_259.04586	0.626328	0.0117882	0.276631	1.00304	HS:Control	POS	0.69	259.046	C6 H14 N O8 P	D-Glucosamine 6-phosphate	0.000153172	0.591295	NA	level4	ChemSpider	NA	NA	NA	NA	NA	NA	NA	NA	NA	Down	2.5705e+07	2.34083e+07	2.17899e+07	3.39197e+07	3.23597e+07	2.90009e+07	2.85669e+07	1.29185e+07	1.50784e+07	1.95712e+07	1.12565e+07	1.66938e+07
0.698_280.07264	0.101149	0.019242	0.276631	1.89364	HS:Control	NEG	0.698	280.073	C9 H16 N2 O6 S	gamma-Glutamyl-3-(methylsulfinyl)alanine	-0.0002647	-0.945112	NA	level4	ChemSpider	NA	NA	NA	NA	NA	NA	NA	NA	NA	Down	6.67891e+06	8.01003e+06	6.04662e+06	358994	560237	804263	810253	131711	142714	803053	265710	118270
0.701_192.06086	0.11583	0.0471095	0.283802	1.59815	HS:Control	POS	0.701	192.061	C11 H12 O S	(2E)-2-(methylthiomethyl)-3-phenyl-2-propenal	-2.07471e-05	-0.108023	NA	level4	ChemSpider	NA	NA	NA	NA	NA	NA	NA	NA	NA	Down	489893	438060	473577	4.93841e+06	5.95381e+06	7.30736e+06	513369	359470	323115	401292	344494	328655
0.701_634.13530	0.272582	0.0176928	0.276631	1.48412	HS:Control	POS	0.701	634.135	C32 H26 O14	Actinorhodin	0.00304632	4.80391	NA	level4	ChemSpider	NA	NA	NA	NA	NA	NA	NA	NA	NA	Down	4.23922e+06	3.75713e+06	3.78198e+06	1.61758e+07	1.99112e+07	1.66833e+07	4.27391e+06	1.73861e+06	1.81477e+06	6.40143e+06	1.31392e+06	2.05217e+06
10.002_446.37602	0.202613	0.00930299	0.276631	1.86097	HS:Control	POS	10.002	446.376	C29 H50 O3	2-(3-Hydroxy-3,7,11,15-tetramethylhexadecyl)-3,5,6-trimethyl-1,4-benzoquinone	2.8845e-05	0.0646203	NA	level4	ChemSpider	NA	NA	NA	NA	NA	NA	NA	NA	NA	Down	2.6854e+07	8.90325e+06	2.28101e+06	5.46048e+06	6.4645e+06	2.82625e+06	6.31716e+06	502676	671487	1.18436e+06	568188	1.45199e+06
10.007_486.36865	0.177746	0.00731473	0.276631	2.03203	HS:Control	POS	10.007	486.369	C31 H50 O4	(1S,3R,5Z,7E,9xi,17beta)-17-(1-{[(2-Hydroxy-2-propylpentyl)oxy]methyl}cyclopropyl)-9,10-secoandrosta-5,7,10-triene-1,3-diol	-0.00225694	-4.64037	NA	level4	ChemSpider	NA	NA	NA	NA	NA	NA	NA	NA	NA	Down	1.9844e+07	6.82056e+06	1.77613e+06	3.76252e+06	4.89294e+06	1.25104e+06	4.89456e+06	334474	363384	453201	351693	418758
10.008_568.47116	11.1815	0.0464635	0.283802	1.63223	HS:Control	NEG	10.008	568.471	C34 H64 O6	1-(Decanoyloxy)-3-(octanoyloxy)-2-propanyl tridecanoate	0.000865677	1.52282	NA	level4	ChemSpider	NA	NA	NA	NA	NA	NA	NA	NA	NA	Up	73085.4	33699.8	35974	56036.4	56299.3	63138.8	67680.4	227772	544888	42487	238912	2.4366e+06
10.015_593.40582	14.9443	0.0387741	0.277575	1.74594	HS:Control	POS	10.015	593.406	C30 H60 N O8 P	(2R)-2,3-Bis(undecanoyloxy)propyl 2-(trimethylammonio)ethyl phosphate	0.000161446	0.272066	NA	level4	ChemSpider	NA	NA	NA	NA	NA	NA	NA	NA	NA	Up	91120.2	50369.3	63087.3	122542	100063	114876	106805	416511	1.04548e+06	92561.3	558639	5.88064e+06
10.018_576.44002	13.5834	0.0270034	0.276631	1.89415	HS:Control	NEG	10.018	576.44	C35 H60 O6	Daucosterol	0.00102649	1.78074	NA	level4	ChemSpider	NA	NA	NA	NA	NA	NA	NA	NA	NA	Up	55741.7	14045.7	39019.2	23355.3	23464.9	29577.4	28208.4	307466	453572	32383.3	288919	1.40515e+06
10.028_318.25577	0.476633	0.0232294	0.276631	1.43549	HS:Control	POS	10.028	318.256	C21 H34 O2	Allopregnanolone	-0.000109987	-0.345592	NA	level4	ChemSpider	NA	NA	NA	NA	NA	NA	NA	NA	NA	Down	2.04034e+08	9.20451e+07	1.14011e+08	9.46954e+07	9.41209e+07	9.02917e+07	1.9281e+08	2.50654e+07	3.79651e+07	2.80977e+07	1.884e+07	2.57163e+07
10.035_390.31322	3.32551	0.0311296	0.276631	1.31041	HS:Control	POS	10.035	390.313	C25 H42 O3	(2E)-2-[(2E)-2-{(1R,3aS,7aR)-1-[(2R)-6-Hydroxy-6-methyl-2-heptanyl]-7a-methyloctahydro-4H-inden-4-ylidene}ethylidene]-3-methylene-1,4-butanediol	-0.000177392	-0.454487	NA	level4	ChemSpider	NA	NA	NA	NA	NA	NA	NA	NA	NA	Up	167965	433715	123805	310383	428470	176298	601858	535990	1.42875e+06	357086	267624	2.26465e+06
10.036_789.55314	24.3605	0.0172141	0.276631	2.16844	HS:Control	POS	10.036	789.553	C42 H80 N O10 P	1-stearoyl-2-oleoyl-sn-glycero-3-phosphoserine	0.00115245	1.45963	NA	level4	ChemSpider	NA	NA	NA	NA	NA	NA	NA	NA	NA	Up	548744	237200	367721	224043	174568	540260	345904	5.6449e+06	7.8832e+06	700171	3.3481e+06	3.3053e+07
10.053_787.53672	18.2748	0.0137986	0.276631	2.15478	HS:Control	POS	10.053	787.537	C42 H78 N O10 P	Dioleoylphosphatidylserine	0.00038266	0.485895	NA	level4	ChemSpider	NA	NA	NA	NA	NA	NA	NA	NA	NA	Up	548744	237200	367721	224043	161162	540260	345904	4.96982e+06	9.51384e+06	700171	3.36185e+06	1.91042e+07
10.067_652.43220	0.228252	0.0148933	0.276631	1.57042	HS:Control	POS	10.067	652.432	C33 H65 O10 P	(15R,21S)-18,21,22-Trihydroxy-3-methyl-18-oxido-12-oxo-13,17,19-trioxa-18lambda~5~-phosphadocosan-15-yl 12-methyltridecanoate	0.00066498	1.01923	NA	level4	ChemSpider	NA	NA	NA	NA	NA	NA	NA	NA	NA	Down	4.88337e+06	596770	2.65458e+06	1.37419e+06	1.30029e+06	494575	649832	642315	548415	187854	288467	263230
10.075_430.30587	5.79953	0.0221919	0.276631	1.7529	HS:Control	POS	10.075	430.306	C22 H42 N2 O6	N-(3-Hydroxy-15-methylhexadecanoyl)glycyl-L-serine	0.00157856	3.66848	NA	level4	ChemSpider	NA	NA	NA	NA	NA	NA	NA	NA	NA	Up	891115	1.74165e+06	1.66382e+06	1.28168e+06	1.5698e+06	8.31906e+06	5.47486e+06	1.33326e+07	1.90238e+07	1.38912e+06	7.57937e+06	4.29023e+07
10.077_394.18000	0.593994	0.0438131	0.283163	1.45758	HS:Control	POS	10.077	394.18	C24 H26 O5	1,3,8-Trihydroxy-4-methyl-2,7-bis(3-methyl-2-buten-1-yl)-9H-xanthen-9-one	0.00197558	5.0119	NA	level4	ChemSpider	NA	NA	NA	NA	NA	NA	NA	NA	NA	Down	348058	383784	446641	814564	609263	647185	1.42541e+06	84658.2	110533	145906	84024.5	79644.2
10.088_827.53246	9.9268	0.0397563	0.277575	1.6266	HS:Control	POS	10.088	827.532	C44 H78 N O11 P	(2R)-2-{[(7E,14Z)-11-Hydroxy-1,9-dioxo-5,6-epoxyprosta-7,14-dien-1-yl]oxy}-3-(palmitoyloxy)propyl 2-(trimethylammonio)ethyl phosphate	0.00120882	1.46075	NA	level4	ChemSpider	NA	NA	NA	NA	NA	NA	NA	NA	NA	Up	96788.9	76286.1	76637.9	154203	110038	99347.9	143898	425298	961818	97501.5	365496	4.09412e+06
10.117_451.36634	12.6332	0.0398754	0.277575	1.7929	HS:Control	POS	10.117	451.366	C27 H49 N O4	(11Z,14Z)-eicosadienoylcarnitine	0.000183215	0.405912	NA	level4	ChemSpider	NA	NA	NA	NA	NA	NA	NA	NA	NA	Up	138460	78871.8	85835.4	171946	92997.3	250997	110758	1.59771e+06	1.69299e+06	106936	1.01274e+06	5.82681e+06
10.188_861.55028	5.78325	0.0374525	0.27722	1.46993	HS:Control	POS	10.188	861.55	C48 H80 N O10 P	O-[{(2R)-2-[(4Z,7Z,10Z,13Z,16Z,19Z)-4,7,10,13,16,19-Docosahexaenoyloxy]-3-[(11Z)-11-icosenoyloxy]propoxy}(hydroxy)phosphoryl]-L-serine	-0.00170438	-1.97826	NA	level4	ChemSpider	NA	NA	NA	NA	NA	NA	NA	NA	NA	Up	145152	79406.2	94170.9	184602	256639	249716	281100	674314	317955	334720	241482	3.9897e+06
10.191_642.41020	6.38097	0.0450457	0.283357	1.59596	HS:Control	POS	10.191	642.41	C38 H58 O8	(3beta,5beta)-5,14-Dihydroxy-3-[(14-hydroxytetradecanoyl)oxy]-19-oxobufa-20,22-dienolide	-0.0029647	-4.61494	NA	level4	ChemSpider	NA	NA	NA	NA	NA	NA	NA	NA	NA	Up	115062	267835	1.13409e+06	449166	325732	248131	525468	3.09688e+06	7.04029e+06	188940	1.30816e+06	4.04804e+06
10.195_400.33403	4.85098	0.0279674	0.276631	1.46677	HS:Control	POS	10.195	400.334	C27 H44 O2	MFCD00010474	-0.000105299	-0.263029	NA	level4	ChemSpider	NA	NA	NA	NA	NA	NA	NA	NA	NA	Up	6.5826e+06	2.22182e+06	3.42572e+06	5.55381e+06	5.50872e+06	5.78666e+06	7.20331e+06	1.19893e+07	2.88661e+07	4.88959e+06	1.43248e+07	7.37902e+07
10.211_795.53969	5.07354	0.0197004	0.276631	1.63684	HS:Control	POS	10.211	795.54	C44 H78 N O9 P	1-(1Z-octadecenyl)-2-arachidonoyl-sn-glycero-3-phosphoserine	-0.00172814	-2.17229	NA	level4	ChemSpider	NA	NA	NA	NA	NA	NA	NA	NA	NA	Up	1.50784e+06	237313	432244	440695	769737	1.90982e+06	1.66997e+06	3.5273e+06	2.03268e+06	1.93476e+06	1.20362e+06	1.65095e+07
10.236_773.55721	8.44328	0.013629	0.276631	1.8019	HS:Control	POS	10.236	773.557	C42 H80 N O9 P	1-(1Z-octadecenyl)-2-oleoyl-sn-glycero-3-phosphoserine	0.000141535	0.182966	NA	level4	ChemSpider	NA	NA	NA	NA	NA	NA	NA	NA	NA	Up	1.93576e+06	515430	736556	826432	2.02792e+06	2.25068e+06	2.36605e+06	6.77097e+06	7.04228e+06	3.06551e+06	3.09366e+06	4.76797e+07
10.239_454.34500	0.459701	0.021541	0.276631	1.22408	HS:Control	POS	10.239	454.345	C30 H46 O3	Seocalcitol	0.000302469	0.665726	NA	level4	ChemSpider	NA	NA	NA	NA	NA	NA	NA	NA	NA	Down	415816	221603	94121.2	196153	215018	216823	210835	67273.7	82016.2	146981	43488	74386.5
10.259_731.51289	38.2042	0.00858776	0.276631	2.37859	HS:Control	NEG	10.259	731.513	C39 H74 N O9 P	O-{[(2R)-2-[(9Z,12Z)-9,12-Heptadecadienoyloxy]-3-(hexadecyloxy)propoxy](hydroxy)phosphoryl}-L-serine	0.00277274	3.79044	NA	level4	ChemSpider	NA	NA	NA	NA	NA	NA	NA	NA	NA	Up	6824.4	4342	4968.41	8053.95	7969.61	12284.1	21239.3	165290	145194	20574.5	52600.2	1.29299e+06
10.279_346.28693	0.580219	0.0490965	0.286078	1.27902	HS:Control	POS	10.279	346.287	C23 H38 O2	5-[(8Z)-8-Heptadecen-1-yl]-1,3-benzenediol	-0.000255106	-0.736689	NA	level4	ChemSpider	NA	NA	NA	NA	NA	NA	NA	NA	NA	Down	4.65106e+06	4.34488e+06	5.16677e+06	9.10631e+06	6.4123e+06	4.80008e+06	1.18883e+07	1.52555e+06	2.74148e+06	1.30388e+06	1.02607e+06	1.52145e+06
10.283_363.31352	0.580219	0.0490965	0.286078	1.27902	HS:Control	POS	10.283	363.314	C23 H41 N O2	Terminaline	-0.000210136	-0.578387	NA	level4	ChemSpider	NA	NA	NA	NA	NA	NA	NA	NA	NA	Down	4.65106e+06	4.34488e+06	5.16677e+06	9.10631e+06	6.4123e+06	4.80008e+06	1.18883e+07	1.52555e+06	2.74148e+06	1.30388e+06	1.02607e+06	1.52145e+06
10.322_388.29775	4.90045	0.0364147	0.276909	1.45119	HS:Control	POS	10.322	388.298	C25 H40 O3	DROMOSTANOLONE TETRAHYDROPYRANYL ETHER	2.19183e-06	0.00564472	NA	level4	ChemSpider	NA	NA	NA	NA	NA	NA	NA	NA	NA	Up	34911.6	30764	35708.4	65743.4	56953.7	58715.7	61719.8	193618	260629	47059.6	91918	730889
10.354_771.54165	11.7735	0.0162868	0.276631	1.85437	HS:Control	POS	10.354	771.542	C42 H78 N O9 P	O-[{(2R)-3-(Hexadecyloxy)-2-[(8Z,11Z,14Z)-8,11,14-icosatrienoyloxy]propoxy}(hydroxy)phosphoryl]-L-serine	0.000229828	0.297882	NA	level4	ChemSpider	NA	NA	NA	NA	NA	NA	NA	NA	NA	Up	484586	173623	143209	410435	362550	521679	854055	1.86554e+06	2.90464e+06	511415	965442	1.75772e+07
10.359_426.34987	0.388282	0.0177056	0.276631	1.33847	HS:Control	POS	10.359	426.35	C29 H46 O2	4beta-methylzymosterol-4-carbaldehyde	8.6566e-05	0.20304	NA	level4	ChemSpider	NA	NA	NA	NA	NA	NA	NA	NA	NA	Down	4.05183e+06	1.40767e+06	2.00534e+06	1.76019e+06	1.73751e+06	707536	1.13026e+06	664379	637793	1.39062e+06	263344	444883
10.36_672.49321	3.74088	0.00312094	0.276631	1.62691	HS:Control	POS	10.36	672.493	C41 H68 O7	(2S)-3-Hydroxy-1,2-propanediyl bis[11-(3-methyl-5-propyl-2-furyl)undecanoate]	-0.00329259	-4.89607	NA	level4	ChemSpider	NA	NA	NA	NA	NA	NA	NA	NA	NA	Up	66279.5	57155.3	57588	143377	101017	113442	148345	456269	394449	116868	516121	383752
10.37_785.55684	11.3187	0.0328071	0.276631	1.72102	HS:Control	POS	10.37	785.557	C43 H80 N O9 P	O-[{(2R)-2-[(9Z,12Z)-9,12-Heptadecadienoyloxy]-3-[(1Z)-1-icosen-1-yloxy]propoxy}(hydroxy)phosphoryl]-L-serine	-0.000225423	-0.286959	NA	level4	ChemSpider	NA	NA	NA	NA	NA	NA	NA	NA	NA	Up	52376.6	45166.3	45508.2	71966.5	72641.8	67277.9	66750.3	385939	360559	82243.9	264143	2.8578e+06
10.372_436.35549	6.7191	0.0411555	0.277575	1.72451	HS:Control	POS	10.372	436.355	C27 H48 O4	5b-Cholestane-3a,7a,12a,26-tetrol	0.000233858	0.535935	NA	level4	ChemSpider	NA	NA	NA	NA	NA	NA	NA	NA	NA	Up	280582	545926	351337	137480	187739	2.08716e+06	1.54813e+06	2.83304e+06	3.13e+06	188926	1.68527e+06	1.47377e+07
10.372_444.36048	0.440238	0.0491099	0.286078	1.1706	HS:Control	POS	10.372	444.36	C29 H48 O3	3beta-hydroxy-4beta-methyl-5alpha-cholest-7-ene-4alpha-carboxylic acid	0.000134418	0.302498	NA	level4	ChemSpider	NA	NA	NA	NA	NA	NA	NA	NA	NA	Down	5.66505e+07	2.24669e+07	3.59571e+07	3.5563e+07	2.05931e+07	8.35231e+06	1.38303e+07	7.95779e+06	1.8126e+07	2.57287e+07	5.7784e+06	7.63812e+06
10.372_572.44425	6.19721	0.0383426	0.277575	1.61175	HS:Control	POS	10.372	572.444	C36 H60 O5	(2S)-1-Hydroxy-3-(tridecanoyloxy)-2-propanyl (5Z,8Z,11Z,14Z,17Z)-5,8,11,14,17-icosapentaenoate	0.000172832	0.30192	NA	level4	ChemSpider	NA	NA	NA	NA	NA	NA	NA	NA	NA	Up	384938	179866	557717	252632	226208	579110	582312	3.42016e+06	2.57213e+06	194831	1.13094e+06	5.61247e+06
10.373_462.37107	0.440238	0.0491099	0.286078	1.1706	HS:Control	POS	10.373	462.371	C29 H50 O4	certonardosterol J	0.000161311	0.348878	NA	level4	ChemSpider	NA	NA	NA	NA	NA	NA	NA	NA	NA	Down	5.66505e+07	2.24669e+07	3.59571e+07	3.5563e+07	2.05931e+07	8.35231e+06	1.38303e+07	7.95779e+06	1.8126e+07	2.57287e+07	5.7784e+06	7.63812e+06
10.373_484.35312	0.406571	0.0314417	0.276631	1.28902	HS:Control	POS	10.373	484.353	C31 H48 O4	testosterone ketolaurate	-0.00214124	-4.42081	NA	level4	ChemSpider	NA	NA	NA	NA	NA	NA	NA	NA	NA	Down	2.40791e+07	9.10984e+06	1.67409e+07	1.73516e+07	1.13189e+07	3.86057e+06	5.85459e+06	4.03987e+06	6.34286e+06	1.23964e+07	2.65698e+06	2.23547e+06
10.446_298.22966	0.293813	0.0157531	0.276631	1.85306	HS:Control	POS	10.446	298.23	C21 H30 O	CARDANOL TRIENE	-7.66635e-06	-0.0257062	NA	level4	ChemSpider	NA	NA	NA	NA	NA	NA	NA	NA	NA	Down	5.36165e+06	2.13749e+06	1.76613e+06	1.79423e+06	2.22343e+06	2.82184e+06	1.83733e+06	242623	372168	1.99205e+06	182073	105544
10.512_801.58926	9.79042	0.0169322	0.276631	1.78857	HS:Control	POS	10.512	801.589	C44 H84 N O9 P	O-{[(2R)-2-[(13Z,16Z)-13,16-Docosadienoyloxy]-3-(hexadecyloxy)propoxy](hydroxy)phosphoryl}-L-serine	0.000890713	1.11118	NA	level4	ChemSpider	NA	NA	NA	NA	NA	NA	NA	NA	NA	Up	773249	299053	273650	416591	481302	670201	803224	2.16358e+06	2.86103e+06	950552	1.58488e+06	2.01665e+07
10.586_418.34476	0.417796	0.0314193	0.276631	1.46857	HS:Control	POS	10.586	418.345	C27 H46 O3	Yakkasterone	6.29799e-05	0.150545	NA	level4	ChemSpider	NA	NA	NA	NA	NA	NA	NA	NA	NA	Down	1.22323e+06	643854	321684	866497	766371	714616	731683	91958.4	124815	616129	70776.2	259866
10.592_428.36561	0.457597	0.0254041	0.276631	1.15014	HS:Control	POS	10.592	428.366	C29 H48 O2	(-)-Cholesteryl acetate	0.000182677	0.426452	NA	level4	ChemSpider	NA	NA	NA	NA	NA	NA	NA	NA	NA	Down	4.05114e+08	1.78601e+08	2.62455e+08	2.00263e+08	2.1865e+08	7.77453e+07	1.24323e+08	1.10896e+08	9.1395e+07	1.52946e+08	5.11384e+07	8.37751e+07
10.592_468.35810	0.485851	0.0168512	0.276631	1.16897	HS:Control	POS	10.592	468.358	C31 H48 O3	dehydroeburicoic acid	-0.00224665	-4.79683	NA	level4	ChemSpider	NA	NA	NA	NA	NA	NA	NA	NA	NA	Down	8.21594e+07	4.04362e+07	6.8083e+07	5.75149e+07	6.63824e+07	2.46152e+07	3.47185e+07	3.1541e+07	2.07017e+07	4.58926e+07	1.47339e+07	1.72087e+07
10.593_914.73557	0.341725	0.0409798	0.277575	1.27338	HS:Control	POS	10.593	914.736	C60 H98 O6	(2R)-3-[(9Z,12Z)-9,12-Heptadecadienoyloxy]-2-[(9Z,12Z)-9,12-octadecadienoyloxy]propyl (7Z,10Z,13Z,16Z,19Z)-7,10,13,16,19-docosapentaenoate	-0.00077244	-0.84444	NA	level4	ChemSpider	NA	NA	NA	NA	NA	NA	NA	NA	NA	Down	8.86602e+06	3.33358e+06	6.00419e+06	3.46788e+06	3.92702e+06	790979	1.50417e+06	2.17977e+06	1.21296e+06	2.4638e+06	693834	963472
10.595_484.33225	0.463612	0.0295653	0.276631	1.1262	HS:Control	POS	10.595	484.332	C34 H44 O2	(3E,5E,7E,9E,11Z,13E,15E,17E,19Z,21Z)-21-(4-Hydroxy-2,6,6-trimethyl-2-cyclohexen-1-ylidene)-6,10,15,19-tetramethyl-3,5,7,9,11,13,15,17,19-henicosanonaen-2-one	-0.0018794	-3.88037	NA	level4	ChemSpider	NA	NA	NA	NA	NA	NA	NA	NA	NA	Down	4.80618e+06	2.07714e+06	2.97579e+06	2.26979e+06	2.93377e+06	904793	1.30795e+06	1.46295e+06	1.0516e+06	1.9662e+06	640529	973482
10.865_853.56253	0.422407	0.0383795	0.277575	1.20598	HS:Control	POS	10.865	853.563	C50 H80 N O8 P	(2R)-2-[(7Z,10Z,13Z,16Z,19Z)-7,10,13,16,19-Docosapentaenoyloxy]-3-[(5Z,8Z,11Z,14Z,17Z)-5,8,11,14,17-icosapentaenoyloxy]propyl 2-(trimethylammonio)ethyl phosphate	0.000375744	0.440207	NA	level4	ChemSpider	NA	NA	NA	NA	NA	NA	NA	NA	NA	Down	2.14696e+07	1.01326e+07	1.01268e+07	3.74817e+07	4.12927e+07	3.71915e+07	2.58053e+07	5.52747e+06	7.50829e+06	1.0841e+07	5.12411e+06	1.18052e+07
10.951_829.56258	0.506038	0.0329381	0.276631	1.12624	HS:Control	POS	10.951	829.563	C48 H80 N O8 P	1,2-Diarachidonoyl-sn-glycero-3-PC	0.000421283	0.507838	NA	level4	ChemSpider	NA	NA	NA	NA	NA	NA	NA	NA	NA	Down	1.02667e+08	6.51181e+07	6.51242e+07	1.51051e+08	1.67475e+08	1.68655e+08	1.2999e+08	3.55221e+07	3.84045e+07	7.79109e+07	2.65881e+07	5.59776e+07
10.988_787.51924	0.45943	0.036043	0.276631	1.22695	HS:Control	NEG	10.988	787.519	C41 H69 N7 O8	N-Acetylleucylleucylleucylleucylleucyltyrosinamide	-0.00152623	-1.93802	NA	level4	ChemSpider	NA	NA	NA	NA	NA	NA	NA	NA	NA	Down	3.06044e+06	1.03683e+06	1.36922e+06	4.24217e+06	3.33249e+06	3.60445e+06	3.52167e+06	840606	739038	669778	520720	1.35568e+06
10.999_610.45750	17.9941	0.0233662	0.276631	2.03962	HS:Control	POS	10.999	610.457	C39 H62 O5	(2S)-1-Hydroxy-3-[(9Z)-9-tetradecenoyloxy]-2-propanyl (4Z,7Z,10Z,13Z,16Z,19Z)-4,7,10,13,16,19-docosahexaenoate	-0.00222015	-3.63684	NA	level4	ChemSpider	NA	NA	NA	NA	NA	NA	NA	NA	NA	Up	59247.2	49101.8	115510	91641.2	93183.1	93976.7	91991.9	1.46619e+06	1.36762e+06	86027.1	1.4778e+06	4.55527e+06
11.417_765.53043	0.481284	0.0245485	0.276631	1.18306	HS:Control	POS	11.417	765.53	C43 H76 N O8 P	1-oleoyl-2-arachidonoyl-sn-glycerol-3-phosphoethanolamine	-0.000421532	-0.55064	NA	level4	ChemSpider	NA	NA	NA	NA	NA	NA	NA	NA	NA	Down	1.80971e+07	1.16797e+07	1.48119e+07	3.1517e+07	3.30062e+07	2.89446e+07	2.11641e+07	8.57525e+06	6.67296e+06	1.77532e+07	4.6365e+06	7.6424e+06
11.78_793.59866	0.445239	0.0355544	0.276631	1.30168	HS:Control	POS	11.78	793.599	C46 H84 N O7 P	1-Stearoyl-2-arachidonoylplasmenylcholine	0.000117042	0.147482	NA	level4	ChemSpider	NA	NA	NA	NA	NA	NA	NA	NA	NA	Down	2.2573e+07	1.25598e+07	1.424e+07	4.03593e+07	3.67068e+07	3.19608e+07	2.69032e+07	6.10674e+06	6.34421e+06	2.03e+07	2.82713e+06	8.04448e+06
11.829_743.58379	0.483038	0.0439279	0.283247	1.24878	HS:Control	POS	11.829	743.584	C42 H82 N O7 P	1-hexadecyl-2-[(9Z,12Z)-octadecadienoyl]-sn-glycero-3-phosphocholine	0.000899649	1.20988	NA	level4	ChemSpider	NA	NA	NA	NA	NA	NA	NA	NA	NA	Down	3.24374e+06	1.50943e+06	1.81739e+06	4.32995e+06	3.50032e+06	4.02743e+06	3.59627e+06	864836	621660	2.32875e+06	346640	1.14339e+06
12.619_837.62552	0.393331	0.0342952	0.276631	1.33971	HS:Control	POS	12.619	837.626	C48 H88 N O8 P	1-octadecanoyl-2-(7Z,10Z,13Z,16Z-docosatetraenoyl)-sn-glycero-3-phosphocholine	0.000767887	0.916744	NA	level4	ChemSpider	NA	NA	NA	NA	NA	NA	NA	NA	NA	Down	1.6225e+07	7.54601e+06	7.49916e+06	2.85574e+07	2.81963e+07	2.64378e+07	1.51948e+07	2.47863e+06	4.23526e+06	1.34781e+07	2.34891e+06	7.28553e+06
2.683_92.06272	0.426294	0.00772745	0.276631	1.32339	HS:Control	POS	2.683	92.0627	C7 H8	Toluene	0.000123949	1.34636	NA	level4	ChemSpider	NA	NA	NA	NA	NA	NA	NA	NA	NA	Down	1.4648e+07	1.48428e+07	8.31256e+06	4.62164e+06	9.67521e+06	8.76073e+06	5.76956e+06	2.03151e+06	5.14111e+06	4.19333e+06	6.31886e+06	2.49028e+06
2.882_381.17218	0.210937	0.0448892	0.283357	1.49001	HS:Control	POS	2.882	381.172	C24 H22 F3 N	Xaliproden	0.00174371	4.57463	NA	level4	ChemSpider	NA	NA	NA	NA	NA	NA	NA	NA	NA	Down	3.27328e+08	4.27904e+07	2.34927e+08	1.31735e+08	1.23941e+08	1.54723e+07	9.9991e+06	3.34455e+07	3.11985e+07	2.42637e+07	4.09328e+07	4.49817e+07
2.892_393.12049	0.23998	0.0275209	0.276631	1.48759	HS:Control	POS	2.892	393.12	C14 H23 N3 O8 S	gamma-Glutamyl-gamma-glutamyl-S-methylcysteine	-9.99354e-05	-0.25421	NA	level4	ChemSpider	NA	NA	NA	NA	NA	NA	NA	NA	NA	Down	1.02558e+06	1.51017e+06	1.53224e+06	1.33005e+07	2.19505e+06	3.89618e+06	2.61094e+06	475627	527623	643878	727289	644516
2.913_247.05145	0.46788	0.0372394	0.27722	1.52837	HS:Control	POS	2.913	247.051	C12 H10 Cl N3 O	forchlorfenuron	0.000214849	0.869654	NA	level4	ChemSpider	NA	NA	NA	NA	NA	NA	NA	NA	NA	Down	2.29503e+06	1.40674e+06	1.58753e+06	2.64736e+06	805544	2.18892e+06	3.09019e+06	294580	1.12199e+06	245648	175150	186893
3.144_221.10530	1.86709	0.0121214	0.276631	1.04635	HS:Control	POS	3.144	221.105	C12 H15 N O3	Carbofuran	0.00010622	0.480404	NA	level4	ChemSpider	NA	NA	NA	NA	NA	NA	NA	NA	NA	Up	1.18666e+07	1.38464e+07	1.37919e+07	9.1559e+06	1.35911e+07	1.12966e+07	1.79437e+07	1.2531e+07	2.06423e+07	1.93439e+07	3.41854e+07	3.26756e+07
3.245_184.12149	0.568209	0.00277389	0.276631	1.12208	HS:Control	POS	3.245	184.121	C9 H16 N2 O2	apronalide	0.000314611	1.70872	NA	level4	ChemSpider	NA	NA	NA	NA	NA	NA	NA	NA	NA	Down	2.3414e+06	1.27825e+06	1.98332e+06	2.35127e+06	1.78627e+06	1.8028e+06	1.63148e+06	855553	931403	1.29196e+06	787156	1.06148e+06
3.28_303.16822	2.68646	0.0475114	0.28412	1.24684	HS:Control	POS	3.28	303.168	C14 H25 N O6	(4S)-4-[(6-Carboxyhexanoyl)oxy]-4-(trimethylammonio)butanoate	2.80705e-05	0.0925906	NA	level4	ChemSpider	NA	NA	NA	NA	NA	NA	NA	NA	NA	Up	1.25657e+06	1.34952e+06	962297	475290	223441	1.19557e+06	4.33116e+06	1.51716e+06	1.09313e+06	5.19838e+06	943252	1.5922e+06
3.285_205.04096	0.206453	0.00561872	0.276631	2.32765	HS:Control	POS	3.285	205.041	C7 H11 N O4 S	dacisteine	7.9664e-05	0.388527	NA	level4	ChemSpider	NA	NA	NA	NA	NA	NA	NA	NA	NA	Down	3.28791e+06	1.06253e+07	1.88585e+07	3.66523e+07	1.82704e+07	2.8717e+07	2.07437e+07	1.15006e+06	421292	641476	668783	408121
3.464_233.11650	12.4759	0.0180333	0.276631	1.9202	HS:Control	POS	3.464	233.117	C12 H15 N3 O2	Pardoprunox	7.60169e-05	0.32609	NA	level4	ChemSpider	NA	NA	NA	NA	NA	NA	NA	NA	NA	Up	41167	65036.8	64798.9	97384.6	122341	99565.1	83096.3	564484	1.03096e+06	149488	617875	3.67097e+06
3.519_381.15401	3.85755	0.0473839	0.284063	1.6407	HS:Control	POS	3.519	381.154	C18 H24 F N3 O3 S	benthiavalicarb-isopropyl	0.00176532	4.63152	NA	level4	ChemSpider	NA	NA	NA	NA	NA	NA	NA	NA	NA	Up	191530	236158	771530	39958.8	22188.4	59591.9	57485.6	1.02491e+06	570790	676361	1.94445e+06	821660
3.696_200.10496	20.8941	0.01354	0.276631	2.17639	HS:Control	NEG	3.696	200.105	C10 H16 O4	(+/-)-Camphoric acid	9.93355e-05	0.496417	NA	level4	ChemSpider	NA	NA	NA	NA	NA	NA	NA	NA	NA	Up	353004	420231	469139	204110	222961	237974	338478	4.59534e+06	3.91602e+06	732277	8.57952e+06	2.16923e+07
3.715_129.11551	4.9757	0.00247	0.276631	1.80997	HS:Control	POS	3.715	129.116	C7 H15 N O	N-Methylhexanamide	0.000146796	1.13693	NA	level4	ChemSpider	NA	NA	NA	NA	NA	NA	NA	NA	NA	Up	244286	484576	182043	172060	207685	313562	375591	1.13951e+06	1.13071e+06	695947	1.50383e+06	3.1365e+06
3.738_255.18347	24.6784	0.0219441	0.276631	2.13825	HS:Control	POS	3.738	255.183	C14 H25 N O3	C10-HSL	2.59889e-05	0.101844	NA	level4	ChemSpider	NA	NA	NA	NA	NA	NA	NA	NA	NA	Up	232176	135787	62403.3	208385	215514	221410	386719	2.69347e+06	7.64421e+06	101340	5.31797e+06	1.04022e+07
3.818_173.14166	22.0589	0.0456037	0.283357	1.88467	HS:Control	POS	3.818	173.142	C9 H19 N O2	9-Aminononanoic acid	8.564e-05	0.494624	NA	level4	ChemSpider	NA	NA	NA	NA	NA	NA	NA	NA	NA	Up	59972.1	64235.1	82864.3	54188.6	47914.3	55191.7	47400	626975	792408	47307.7	2.2181e+06	4.30531e+06
3.841_438.09421	0.428893	0.0499308	0.286328	1.27099	HS:Control	POS	3.841	438.094	C17 H19 N4 O8 P	riboflavin cyclic 4',5'-phosphate	0.000160507	0.366376	NA	level4	ChemSpider	NA	NA	NA	NA	NA	NA	NA	NA	NA	Down	4.50758e+06	5.74408e+06	5.70878e+06	2.18626e+07	1.84382e+07	2.13713e+07	1.96961e+07	3.28209e+06	2.93614e+06	1.9874e+06	2.0477e+06	3.34665e+06
3.851_327.17943	10.4034	0.0484582	0.285767	1.65532	HS:Control	POS	3.851	327.179	C13 H30 N O6 P	(2R)-2-Hydroxy-3-(pentyloxy)propyl 2-(trimethylammonio)ethyl phosphate	-0.00164409	-5.02501	NA	level4	ChemSpider	NA	NA	NA	NA	NA	NA	NA	NA	NA	Up	31466.2	36935.6	47647.5	30855.9	27155.1	29842.1	27186.5	208990	324602	27787.2	318443	1.21426e+06
3.861_235.12084	11.5409	0.0154731	0.276631	1.92869	HS:Control	POS	3.861	235.121	C13 H17 N O3	N-Methylanhalonine	-1.54081e-06	-0.00655328	NA	level4	ChemSpider	NA	NA	NA	NA	NA	NA	NA	NA	NA	Up	479354	660223	325880	123050	217163	254198	405756	2.09004e+06	3.20595e+06	475782	3.73995e+06	1.38553e+07
3.958_194.08049	0.239701	0.0261842	0.276631	1.51007	HS:Control	POS	3.958	194.08	C8 H10 N4 O2	Caffeine	0.000116425	0.599879	NA	level4	ChemSpider	NA	NA	NA	NA	NA	NA	NA	NA	NA	Down	1.4275e+06	146832	297852	268680	333030	108004	190317	49787.9	30863	82888.6	100731	164297
4.007_271.21475	7.36414	0.0248935	0.276631	1.8044	HS:Control	POS	4.007	271.215	C15 H29 N O3	N-Tridecanoylglycine	4.68509e-06	0.0172745	NA	level4	ChemSpider	NA	NA	NA	NA	NA	NA	NA	NA	NA	Up	524474	708620	535016	189479	86009.5	1.06013e+06	686908	3.18838e+06	8.25096e+06	312703	3.39891e+06	7.01843e+06
4.146_159.03559	0.125838	0.0164238	0.276631	1.93853	HS:Control	POS	4.146	159.036	C6 H9 N O2 S	Citiolone	0.000186138	1.17042	NA	level4	ChemSpider	NA	NA	NA	NA	NA	NA	NA	NA	NA	Down	859850	390218	3.85516e+06	286493	369630	125152	377903	136294	21111	24648.5	161580	19209.8
4.219_189.08254	0.135156	0.00558613	0.276631	2.43665	HS:Control	POS	4.219	189.083	C8 H15 N O2 S	Prenisteine	0.000187905	0.993775	NA	level4	ChemSpider	NA	NA	NA	NA	NA	NA	NA	NA	NA	Down	6.25217e+06	8.16002e+06	2.81692e+06	7.04941e+06	2.17751e+06	4.09903e+06	2.44106e+06	674025	186307	86272.9	700149	41882.6
4.277_300.11098	14.6301	0.0387892	0.277575	1.7356	HS:Control	POS	4.277	300.111	C16 H16 N2 O4	NPPB	-2.87568e-05	-0.0958207	NA	level4	ChemSpider	NA	NA	NA	NA	NA	NA	NA	NA	NA	Up	24916.2	25870.3	26828.2	33573.1	31556.4	35381	34081.8	30251.4	677365	100894	1.43029e+06	333108
4.381_291.07763	0.186251	0.0178184	0.276631	1.99417	HS:Control	POS	4.381	291.078	C12 H13 N5 O2 S	(E)-Prontosil	-0.00136633	-4.69402	NA	level4	ChemSpider	NA	NA	NA	NA	NA	NA	NA	NA	NA	Down	934526	150322	1.72001e+06	2.97574e+06	3.01734e+06	565901	1.15385e+06	310238	29358.4	59186.1	157657	33732.1
4.399_329.18389	7.15272	0.0207908	0.276631	1.70586	HS:Control	POS	4.399	329.184	C16 H27 N O6	Gabapentin enacarbil	4.80694e-05	0.146026	NA	level4	ChemSpider	NA	NA	NA	NA	NA	NA	NA	NA	NA	Up	49487.8	79537.7	50866.4	81300.2	59445	123766	101792	253932	628761	75443	1.28052e+06	838237
4.415_167.04057	0.119474	0.0321614	0.276631	1.67184	HS:Control	POS	4.415	167.041	C8 H9 N O S	phenylthioacetohydroximic acid	9.03625e-05	0.540962	NA	level4	ChemSpider	NA	NA	NA	NA	NA	NA	NA	NA	NA	Down	86468	1.4876e+06	235412	599928	41935.6	479161	53773.5	66714.1	74023.6	49348.2	75967	30293.6
4.419_144.07869	3.13644	0.0371855	0.27722	1.28924	HS:Control	NEG	4.419	144.079	C7 H12 O3	2442	4.36028e-05	0.302632	NA	level4	ChemSpider	NA	NA	NA	NA	NA	NA	NA	NA	NA	Up	96924.6	100394	106093	264500	285790	380904	166202	298276	532007	410892	634739	1.83015e+06
4.481_380.19470	2.63039	0.0331447	0.276631	1.51242	HS:Control	POS	4.481	380.195	C17 H33 O7 P	(2R)-2-Hydroxy-3-(phosphonooxy)propyl (9Z)-9-tetradecenoate	-0.00168656	-4.43601	NA	level4	ChemSpider	NA	NA	NA	NA	NA	NA	NA	NA	NA	Up	158655	462752	38650.4	73446.1	81856	549860	765815	322465	883816	245008	391999	981959
4.655_128.02953	0.34075	0.0133402	0.276631	1.52717	HS:Control	POS	4.655	128.03	C6 H8 O S	3160	-5.29275e-05	-0.4134	NA	level4	ChemSpider	NA	NA	NA	NA	NA	NA	NA	NA	NA	Down	7.18643e+06	6.38312e+06	9.46646e+06	3.32275e+06	3.9622e+06	5.29384e+06	3.20754e+06	3.32443e+06	982315	374520	1.83725e+06	2.4097e+06
4.655_208.05319	0.324027	0.00967476	0.276631	1.58358	HS:Control	POS	4.655	208.053	C14 H8 O2	Anthraquinone	0.000760349	3.6546	NA	level4	ChemSpider	NA	NA	NA	NA	NA	NA	NA	NA	NA	Down	1.71181e+06	1.53422e+06	2.33515e+06	814167	1.05144e+06	1.38117e+06	840406	769116	247567	94347.9	384565	524488
4.655_98.01903	0.318962	0.00912227	0.276631	1.61446	HS:Control	POS	4.655	98.019	C5 H6 S	3-Thiotolene	5.47509e-06	0.0558575	NA	level4	ChemSpider	NA	NA	NA	NA	NA	NA	NA	NA	NA	Down	3.96378e+06	3.52539e+06	5.35944e+06	2.06184e+06	2.51962e+06	3.25275e+06	1.93784e+06	1.83171e+06	563875	216128	877587	1.16988e+06
4.656_110.01906	0.34075	0.0133402	0.276631	1.52717	HS:Control	POS	4.656	110.019	C6 H6 S	Thiophenol	4.38406e-05	0.398482	NA	level4	ChemSpider	NA	NA	NA	NA	NA	NA	NA	NA	NA	Down	7.18643e+06	6.38312e+06	9.46646e+06	3.32275e+06	3.9622e+06	5.29384e+06	3.20754e+06	3.32443e+06	982315	374520	1.83725e+06	2.4097e+06
4.751_163.06348	0.409349	0.016942	0.276631	1.30151	HS:Control	POS	4.751	163.063	C9 H9 N O2	Î³-Oxo-3-pyridinebutanal	0.000149905	0.919305	NA	level4	ChemSpider	NA	NA	NA	NA	NA	NA	NA	NA	NA	Down	435459	488688	477784	1.62412e+06	1.02191e+06	1.00531e+06	491917	227197	269535	711791	197171	170943
4.853_301.18849	13.5039	0.0268227	0.276631	1.9012	HS:Control	POS	4.853	301.188	C15 H27 N O5	3-hydroxy-cis-5-octenoylcarnitine	-0.000429176	-1.42494	NA	level4	ChemSpider	NA	NA	NA	NA	NA	NA	NA	NA	NA	Up	23964.9	29866	25761.4	27145	29451.5	30227.7	27847.6	287125	267882	31813.2	551404	1.08119e+06
4.862_365.18367	15.1579	0.0319632	0.276631	1.8502	HS:Control	POS	4.862	365.184	C19 H27 N O6	Renardine	-0.000165554	-0.453343	NA	level4	ChemSpider	NA	NA	NA	NA	NA	NA	NA	NA	NA	Up	19263	24006.3	17580	21819.1	23673.1	23781.4	22383.9	124258	279954	24875.2	332042	1.18887e+06
4.9_411.19966	14.2772	0.0454685	0.283357	1.7759	HS:Control	POS	4.9	411.2	C23 H29 N3 O2 S	acetophenazine	0.0016153	3.92827	NA	level4	ChemSpider	NA	NA	NA	NA	NA	NA	NA	NA	NA	Up	33734.2	62441.1	51324.5	28621.1	30297.4	28817.8	26014.8	315940	808815	37846.3	305850	1.86405e+06
4.945_145.05277	3.0827	0.0296484	0.276631	1.30146	HS:Control	NEG	4.945	145.053	C9 H7 N O	FG7175000	2.38453e-06	0.0164391	NA	level4	ChemSpider	NA	NA	NA	NA	NA	NA	NA	NA	NA	Up	3.80241e+06	5.58968e+06	4.87251e+06	2.63092e+06	2.81543e+06	2.38997e+06	2.49672e+06	1.01527e+07	9.75364e+06	6.15385e+06	1.56926e+07	2.38809e+07
4.953_179.13112	21.3554	0.0475632	0.28412	1.77822	HS:Control	POS	4.953	179.131	C11 H17 N O	Mexiletine	0.000106477	0.594407	NA	level4	ChemSpider	NA	NA	NA	NA	NA	NA	NA	NA	NA	Up	20755.4	26014.1	20973.3	21367.8	21590.7	22841.8	20454.2	135024	196722	24824	234006	2.24084e+06
4.977_139.09984	4.26902	0.0423167	0.278833	1.39063	HS:Control	POS	4.977	139.1	C8 H13 N O	(+/-)-Tropinone	0.000127942	0.919784	NA	level4	ChemSpider	NA	NA	NA	NA	NA	NA	NA	NA	NA	Up	452835	212011	224498	268567	253365	210028	232840	1.21468e+06	1.5932e+06	219812	1.08254e+06	2.57831e+06
5.02_367.21062	12.3245	0.0152086	0.276631	1.98236	HS:Control	POS	5.02	367.211	C18 H29 N3 O5	Bambuterol	-0.000101992	-0.277748	NA	level4	ChemSpider	NA	NA	NA	NA	NA	NA	NA	NA	NA	Up	57374.3	46994.3	47493.4	68100.3	66771.8	70484.2	66335.6	508116	738597	107620	797539	2.18433e+06
5.028_252.14739	5.23664	0.017001	0.276631	1.75715	HS:Control	POS	5.028	252.147	C13 H20 N2 O3	5-Allyl-5-sec-butyl-1,3-dimethyl-2,4,6(1H,3H,5H)-pyrimidinetrione	4.5292e-07	0.00179625	NA	level4	ChemSpider	NA	NA	NA	NA	NA	NA	NA	NA	NA	Up	95852.6	562516	94074.9	64296.8	47357	188632	146398	705576	1.50589e+06	210650	717245	2.22701e+06
5.038_285.15759	61.5782	0.0229605	0.276631	2.4079	HS:Control	POS	5.038	285.158	C15 H19 N5 O	3-[2-(Dimethylamino)ethyl]-5-(1H-1,2,4-triazol-1-ylmethyl)-1H-indol-6-ol	-0.00137065	-4.8066	NA	level4	ChemSpider	NA	NA	NA	NA	NA	NA	NA	NA	NA	Up	18957.1	17135.5	16838.7	24649.6	33651.1	26978.7	24444.9	1.91531e+06	657604	27224.8	2.70331e+06	3.18288e+06
5.042_293.16263	28.4905	0.0316359	0.276631	2.05165	HS:Control	POS	5.042	293.163	C17 H19 N5	Anastrozole	-0.00142045	-4.84525	NA	level4	ChemSpider	NA	NA	NA	NA	NA	NA	NA	NA	NA	Up	89768.3	160493	101963	76311.4	101881	67846.9	91050.7	1.44189e+06	1.72966e+06	99897.5	3.33188e+06	1.03505e+07
5.061_177.11547	4.73555	0.0167899	0.276631	1.61181	HS:Control	POS	5.061	177.115	C11 H15 N O	Phenmetrazine	0.000101019	0.570358	NA	level4	ChemSpider	NA	NA	NA	NA	NA	NA	NA	NA	NA	Up	57316.9	135165	95247.1	128749	41981.5	175067	95367.3	571412	456132	150158	456031	1.27099e+06
5.134_229.16787	34.7095	0.0298794	0.276631	2.12973	HS:Control	POS	5.134	229.168	C12 H23 N O3	1872050	8.07592e-05	0.352402	NA	level4	ChemSpider	NA	NA	NA	NA	NA	NA	NA	NA	NA	Up	457662	556473	547786	312164	478233	299949	361829	8.95741e+06	7.32763e+06	545333	2.1409e+07	5.34577e+07
5.371_153.11550	7.46602	0.0189584	0.276631	1.77731	HS:Control	POS	5.371	153.115	C9 H15 N O	Pseudopelletierine	0.000131537	0.85907	NA	level4	ChemSpider	NA	NA	NA	NA	NA	NA	NA	NA	NA	Up	681921	754902	603655	639154	1.8053e+06	1.35879e+06	1.04065e+06	8.36369e+06	4.19893e+06	1.12932e+06	1.31982e+07	1.56985e+07
5.409_258.15795	13.1648	0.0314614	0.276631	1.83806	HS:Control	POS	5.409	258.158	C12 H22 N2 O4	2949	-1.1522e-05	-0.0446317	NA	level4	ChemSpider	NA	NA	NA	NA	NA	NA	NA	NA	NA	Up	81117.2	145152	56179.7	78788.3	82255.4	84687.3	78481.1	703172	928784	90202.4	1.5184e+06	3.63433e+06
5.412_166.09702	0.163563	0.0417565	0.278079	1.81544	HS:Control	POS	5.412	166.097	C6 H10 N6	Cyromazine	0.000323354	1.94678	NA	level4	ChemSpider	NA	NA	NA	NA	NA	NA	NA	NA	NA	Down	1.39282e+07	5.37482e+06	445659	907536	2.36751e+06	731287	684715	2.43912e+06	93812.1	514669	133093	20030.9
5.461_386.15126	12.6702	0.0325072	0.276631	1.83411	HS:Control	POS	5.461	386.151	C25 H22 O4	5-Hydroxy-8,8-dimethyl-6-[(1E)-3-methyl-1,3-butadien-1-yl]-2-phenyl-4H,8H-pyrano[2,3-f]chromen-4-one	-0.000546872	-1.41621	NA	level4	ChemSpider	NA	NA	NA	NA	NA	NA	NA	NA	NA	Up	49691.1	41898.5	32836.2	22927.5	23615.8	24644.1	22738.2	462940	519479	38190.1	1.16525e+06	269849
5.469_263.15216	19.9151	0.0214276	0.276631	2.10098	HS:Control	POS	5.469	263.152	C15 H21 N O3	N-(4-Heptanyl)-1,3-benzodioxole-5-carboxamide	1.61136e-05	0.0612329	NA	level4	ChemSpider	NA	NA	NA	NA	NA	NA	NA	NA	NA	Up	37270.6	91969.5	77601.8	27784.4	28970	59414.2	34947.3	675806	886311	100592	1.81491e+06	2.92023e+06
5.513_197.10537	7.09065	0.0384787	0.277575	1.57855	HS:Control	POS	5.513	197.105	C10 H15 N O3	(+/-)-Metanephrine	0.000177011	0.898055	NA	level4	ChemSpider	NA	NA	NA	NA	NA	NA	NA	NA	NA	Up	1.19526e+06	1.37944e+06	1.27828e+06	599238	475831	2.51562e+06	1.19017e+06	3.62756e+06	6.11458e+06	1.15169e+06	3.0598e+07	1.00984e+07
5.569_205.14678	15.2679	0.0370322	0.27722	1.85282	HS:Control	POS	5.569	205.147	C13 H19 N O	Amfepramone	0.000111934	0.545631	NA	level4	ChemSpider	NA	NA	NA	NA	NA	NA	NA	NA	NA	Up	28384.7	26031.1	29515.8	33129.9	60406.6	45248.2	29592	315548	503467	33907.7	703143	1.81476e+06
5.582_302.16643	0.165723	0.0173228	0.276631	1.86637	HS:Control	POS	5.582	302.166	C22 H22 O	dehydrosiphonochalynol	-0.000635835	-2.10425	NA	level4	ChemSpider	NA	NA	NA	NA	NA	NA	NA	NA	NA	Down	391612	132750	269618	2.97231e+06	1.10001e+06	1.60017e+06	670553	38302.2	146595	115545	42736.7	57912.1
5.78_275.16340	15.1498	0.0057163	0.276631	2.17717	HS:Control	POS	5.78	275.163	C15 H21 N3 O2	(-)-Physostigmine	2.43293e-05	0.0884176	NA	level4	ChemSpider	NA	NA	NA	NA	NA	NA	NA	NA	NA	Up	181447	297455	98048.2	305930	316326	250361	289510	2.23937e+06	3.16379e+06	1.05405e+06	3.06101e+06	1.21529e+07
5.781_407.30373	22.8873	0.0197299	0.276631	2.15602	HS:Control	POS	5.781	407.304	C24 H41 N O4	Cassaidine	0.000169379	0.415854	NA	level4	ChemSpider	NA	NA	NA	NA	NA	NA	NA	NA	NA	Up	21755.3	18009.1	19181.9	25168.4	27254.4	29187.2	28469.7	733745	272072	31037.9	657512	1.49412e+06
5.796_99.10489	6.73661	0.0450071	0.283357	1.57468	HS:Control	POS	5.796	99.1049	C6 H13 N	Cyclohexylamine	8.70737e-05	0.878602	NA	level4	ChemSpider	NA	NA	NA	NA	NA	NA	NA	NA	NA	Up	279581	1.25594e+06	449865	447665	882058	1.08484e+06	846843	6.0292e+06	1.33398e+06	535673	9.91169e+06	1.09834e+07
5.825_314.13007	8.58926	0.0292216	0.276631	1.74925	HS:Control	POS	5.825	314.13	C17 H19 Cl N4	lorcinadol	0.000245212	0.780606	NA	level4	ChemSpider	NA	NA	NA	NA	NA	NA	NA	NA	NA	Up	427949	324856	338376	212400	214214	301397	247448	2.89202e+06	3.35666e+06	317546	6.0209e+06	2.79092e+06
5.845_243.18348	39.5283	0.0271997	0.276631	2.20825	HS:Control	POS	5.845	243.183	C13 H25 N O3	N-Undecanoylglycine	3.22803e-05	0.132741	NA	level4	ChemSpider	NA	NA	NA	NA	NA	NA	NA	NA	NA	Up	421505	519334	665415	335249	404606	311179	346206	1.09153e+07	1.00252e+07	604222	2.61783e+07	5.69689e+07
5.854_254.05791	0.0840836	0.0225625	0.276631	1.95414	HS:Control	POS	5.854	254.058	C15 H10 O4	Daidzein	2.0847e-06	0.00820561	NA	level4	ChemSpider	NA	NA	NA	NA	NA	NA	NA	NA	NA	Down	568439	1.44703e+06	1.77465e+06	141747	163876	30798.6	44180.6	26248.2	28669.6	192290	25315.6	30270.7
5.858_284.11614	17.5118	0.0422823	0.278833	1.76678	HS:Control	POS	5.858	284.116	C16 H16 N2 O3	metominostrobin	4.38727e-05	0.154418	NA	level4	ChemSpider	NA	NA	NA	NA	NA	NA	NA	NA	NA	Up	27373.4	26409.2	26440.7	32012	32648.1	33900.1	30602.5	85175.9	610751	35784.4	1.92431e+06	444206
5.968_208.11009	7.45892	0.0258754	0.276631	1.68934	HS:Control	POS	5.968	208.11	C12 H16 O3	Asarone	0.000149695	0.71931	NA	level4	ChemSpider	NA	NA	NA	NA	NA	NA	NA	NA	NA	Up	163321	242710	238632	220920	277164	419583	330500	1.19803e+06	1.29887e+06	262327	2.54827e+06	6.0153e+06
6.14_273.14775	9.68565	0.0184173	0.276631	1.85754	HS:Control	POS	6.14	273.148	C15 H19 N3 O2	N-DesmethylZolmitriptan	2.58969e-05	0.094809	NA	level4	ChemSpider	NA	NA	NA	NA	NA	NA	NA	NA	NA	Up	121015	28208.7	30638.9	36594.2	39359.5	38456.3	34622.7	315707	428543	89992	599577	1.38178e+06
6.207_277.16774	44.3778	0.0166898	0.276631	2.37198	HS:Control	POS	6.207	277.168	C16 H23 N O3	promacyl	-5.4351e-05	-0.196094	NA	level4	ChemSpider	NA	NA	NA	NA	NA	NA	NA	NA	NA	Up	272277	777882	524080	229331	306973	311128	376854	9.45299e+06	1.45218e+07	795144	2.13645e+07	6.09573e+07
6.208_231.16182	13.2643	0.024763	0.276631	1.88935	HS:Control	POS	6.208	231.162	C15 H21 N O	EPTAZOCINE	-0.00049296	-2.13253	NA	level4	ChemSpider	NA	NA	NA	NA	NA	NA	NA	NA	NA	Up	25080.2	23997.5	27786.5	33566.8	34047.4	38147.4	33566.7	214277	312966	37717.6	503925	1.31995e+06
6.229_316.17857	31.8812	0.0292018	0.276631	2.11419	HS:Control	POS	6.229	316.179	C18 H24 N2 O3	amquinate	-0.000123639	-0.391041	NA	level4	ChemSpider	NA	NA	NA	NA	NA	NA	NA	NA	NA	Up	23727.3	53499.3	23984	28709.3	29767.3	32118.2	27384.8	487632	861542	37018.5	947588	3.75383e+06
6.232_483.29531	35.1746	0.0268818	0.276631	2.18109	HS:Control	POS	6.232	483.295	C22 H46 N O8 P	O-{[(2R)-3-(Hexadecyloxy)-2-hydroxypropoxy](hydroxy)phosphoryl}-L-serine	-0.000797677	-1.65049	NA	level4	ChemSpider	NA	NA	NA	NA	NA	NA	NA	NA	NA	Up	167611	88704.7	100610	127012	153194	125122	118206	3.09681e+06	2.95365e+06	142625	6.69798e+06	1.38027e+07
6.255_291.21980	2.08578	0.0064502	0.276631	1.21538	HS:Control	POS	6.255	291.22	C18 H29 N O2	Penbutolol	-2.44012e-05	-0.0837895	NA	level4	ChemSpider	NA	NA	NA	NA	NA	NA	NA	NA	NA	Up	320910	500399	166020	295957	259035	406670	508627	698826	529911	423302	734801	1.16969e+06
6.292_328.14571	9.88085	0.0313066	0.276631	1.76868	HS:Control	POS	6.292	328.146	C15 H24 N2 O4 S	tiapride	3.01691e-05	0.0919383	NA	level4	ChemSpider	NA	NA	NA	NA	NA	NA	NA	NA	NA	Up	52508.5	42270.7	34295.1	39790	47992	39197.6	34587.7	406052	542316	44870.1	1.01971e+06	482491
6.299_268.13097	3.59036	0.0355256	0.276631	1.3253	HS:Control	POS	6.299	268.131	C14 H20 O5	2-(2-Carboxyethyl)-4-methyl-5-pentyl-3-furoic acid	-0.000105601	-0.393841	NA	level4	ChemSpider	NA	NA	NA	NA	NA	NA	NA	NA	NA	Up	106591	102429	46338.1	108062	74519.6	154032	74401	176391	488551	168127	310670	907248
6.299_430.19701	13.6521	0.0336341	0.276631	1.86552	HS:Control	POS	6.299	430.197	C24 H30 O7	Athamantin	-0.00214506	-4.98621	NA	level4	ChemSpider	NA	NA	NA	NA	NA	NA	NA	NA	NA	Up	912652	727653	814142	691591	834150	739084	643642	8.89709e+06	1.26182e+07	779889	1.15606e+07	2.99284e+07
6.359_307.21474	40.2762	0.0267485	0.276631	2.25895	HS:Control	POS	6.359	307.215	C18 H29 N O3	Betaxolol	-2.43486e-07	-0.000792561	NA	level4	ChemSpider	NA	NA	NA	NA	NA	NA	NA	NA	NA	Up	1.08149e+06	397358	204869	108157	140005	58784.6	178278	7.34472e+06	9.84173e+06	249246	2.11491e+07	4.14133e+07
6.437_372.19386	8.02555	0.0414453	0.277688	1.61528	HS:Control	POS	6.437	372.194	C22 H28 O5	meprednisone	0.000190887	0.512871	NA	level4	ChemSpider	NA	NA	NA	NA	NA	NA	NA	NA	NA	Up	1.0597e+06	844897	945322	803024	968554	858170	747349	4.94226e+06	6.46893e+06	905550	8.11872e+06	2.27946e+07
6.438_388.18743	11.1693	0.0390906	0.277575	1.80286	HS:Control	POS	6.438	388.187	C22 H28 O6	Quassin	-0.00116292	-2.99576	NA	level4	ChemSpider	NA	NA	NA	NA	NA	NA	NA	NA	NA	Up	202739	187833	394309	150492	158469	190784	151257	4.08551e+06	2.05702e+06	178951	2.41267e+06	5.46298e+06
6.443_391.23601	19.6054	0.0406718	0.277575	1.86853	HS:Control	POS	6.443	391.236	C23 H29 N5 O	2172	-0.00120097	-3.06967	NA	level4	ChemSpider	NA	NA	NA	NA	NA	NA	NA	NA	NA	Up	57859.9	57947.8	64835.5	46427.9	48888.8	58858.1	46664	431345	822625	55207.8	1.00446e+06	4.20394e+06
6.492_299.17326	108.957	0.0402589	0.277575	2.43196	HS:Control	POS	6.492	299.173	C15 H25 N O5	lycopsamine	-8.48073e-06	-0.0283472	NA	level4	ChemSpider	NA	NA	NA	NA	NA	NA	NA	NA	NA	Up	25179.8	284132	43863.2	44172.8	30946.4	64848.5	30888.2	3.87232e+06	1.24289e+07	39377.6	1.52038e+07	2.21562e+07
6.538_432.21265	28.8163	0.0289719	0.276631	2.15555	HS:Control	POS	6.538	432.213	C24 H32 O7	Schisandrin	-0.00215103	-4.97676	NA	level4	ChemSpider	NA	NA	NA	NA	NA	NA	NA	NA	NA	Up	201027	214146	247511	170373	168680	214240	164322	8.96484e+06	4.49412e+06	213687	1.23573e+07	8.84574e+06
6.547_607.31255	31.6709	0.0233352	0.276631	2.16188	HS:Control	POS	6.547	607.313	C31 H41 N7 O6	N-{[(1S)-1-[(4S)-2-Amino-1,4,5,6-tetrahydro-4-pyrimidinyl]-2-{[(2S)-4-methyl-1-oxo-1-{[(2S)-1-oxo-3-phenyl-2-propanyl]amino}-2-pentanyl]amino}-2-oxoethyl]carbamoyl}-L-phenylalanine	0.000715759	1.17857	NA	level4	ChemSpider	NA	NA	NA	NA	NA	NA	NA	NA	NA	Up	71839.6	61209.4	64674.4	81124.3	86220.1	84618.7	80040.8	926513	1.85894e+06	108671	3.22649e+06	8.04133e+06
6.556_465.28399	380.796	0.0074864	0.276631	3.1775	HS:Control	POS	6.556	465.284	C22 H44 N O7 P	lysophosphatidylcholine 14:1(9Z)/0:0	-0.00155358	-3.33898	NA	level4	ChemSpider	NA	NA	NA	NA	NA	NA	NA	NA	NA	Up	50490.4	450336	104073	57015.8	60597.3	59471.8	210782	2.83824e+07	3.86756e+07	443541	5.86439e+07	1.71421e+08
6.58_389.27770	24.7112	0.0218203	0.276631	2.11666	HS:Control	POS	6.58	389.278	C20 H39 N O6	(2S,3R,4R,5S,6E,14R)-2-Amino-3,4,5,14-tetrahydroxy-6-icosenoic acid	-4.12555e-05	-0.10598	NA	level4	ChemSpider	NA	NA	NA	NA	NA	NA	NA	NA	NA	Up	29202.7	26626.2	28126.1	34744.1	37105.1	36701.7	34817.9	351313	686543	47272.2	1.1798e+06	2.45732e+06
6.648_394.23582	29.6726	0.0293288	0.276631	2.14422	HS:Control	NEG	6.648	394.236	C22 H34 O6	1-(3,4-Dimethoxyphenyl)-3,5-decanediyl diacetate	0.000284153	0.720769	NA	level4	ChemSpider	NA	NA	NA	NA	NA	NA	NA	NA	NA	Up	179937	277376	410972	93142	172090	104161	137108	4.87628e+06	5.80994e+06	207270	6.77436e+06	1.89201e+07
6.656_330.19770	0.172665	0.00914603	0.276631	2.17971	HS:Control	POS	6.656	330.198	C24 H26 O	(2E,4E,6E,8E,10E,12E,14E,16E,18E,20E,22E)-2,4,6,8,10,12,14,16,18,20,22-Tetracosaundecaenal	-0.000660706	-2.00094	NA	level4	ChemSpider	NA	NA	NA	NA	NA	NA	NA	NA	NA	Down	871201	715040	651777	3.21635e+06	3.00632e+06	1.78832e+06	965097	49646.5	347286	336639	27361.8	43617.8
6.661_200.15262	17.9917	0.017929	0.276631	2.10492	HS:Control	POS	6.661	200.153	C10 H20 N2 O2	HMBA	0.000144079	0.719845	NA	level4	ChemSpider	NA	NA	NA	NA	NA	NA	NA	NA	NA	Up	80792.7	541422	80906.6	97607.9	106334	99001.8	92593.3	1.87148e+06	1.82834e+06	353195	3.89157e+06	1.00636e+07
6.663_306.18308	15.0425	0.0320127	0.276631	1.90833	HS:Control	POS	6.663	306.183	C18 H26 O4	Di-n-Amyl phthalate	-3.39431e-05	-0.110859	NA	level4	ChemSpider	NA	NA	NA	NA	NA	NA	NA	NA	NA	Up	360490	523815	640278	376377	386277	441450	363010	4.82324e+06	6.56247e+06	472063	1.18737e+07	1.69519e+07
6.732_401.27779	40.6812	0.0231714	0.276631	2.2691	HS:Control	POS	6.732	401.278	C21 H39 N O6	Myriocin	5.02882e-05	0.12532	NA	level4	ChemSpider	NA	NA	NA	NA	NA	NA	NA	NA	NA	Up	80992.8	70605.7	82183.7	95007.1	101273	103673	89772.7	2.43122e+06	2.49961e+06	118247	5.82371e+06	1.07504e+07
6.753_516.29426	0.481015	0.0251779	0.276631	1.29106	HS:Control	NEG	6.753	516.294	C26 H44 O10	3-O-(alpha-L-olivosyl)oleandolide	0.000816615	1.58169	NA	level4	ChemSpider	NA	NA	NA	NA	NA	NA	NA	NA	NA	Down	1.29528e+07	6.50211e+06	8.80351e+06	1.25295e+07	1.70805e+07	1.80629e+07	4.65882e+06	1.957e+06	4.2207e+06	1.72971e+07	3.57042e+06	4.81999e+06
6.775_324.19350	7.914	0.0332548	0.276631	1.67848	HS:Control	POS	6.775	324.193	C18 H28 O5	(9Z,13Z,15Z)-14,18-Dihydroxy-12-oxo-9,13,15-octadecatrienoic acid	-0.000175324	-0.540799	NA	level4	ChemSpider	NA	NA	NA	NA	NA	NA	NA	NA	NA	Up	742401	670580	988910	616102	871400	802765	644579	4.50215e+06	5.36021e+06	865124	1.11791e+07	1.45825e+07
6.791_276.13619	0.497836	0.046567	0.283802	1.1875	HS:Control	POS	6.791	276.136	C16 H20 O4	2-(1-Hydroxy-2,4,6-trimethyl-3-oxo-2,3-dihydro-1H-inden-5-yl)ethyl acetate	2.88522e-05	0.104485	NA	level4	ChemSpider	NA	NA	NA	NA	NA	NA	NA	NA	NA	Down	1.91438e+06	1.31592e+06	1.70413e+06	3.19016e+06	3.69264e+06	1.27507e+06	1.59351e+06	374861	674185	1.44134e+06	416044	2.01787e+06
6.863_330.24077	15.7844	0.0319259	0.276631	1.97614	HS:Control	NEG	6.863	330.241	C18 H34 O5	(-)-pinellic acid	0.000146101	0.442406	NA	level4	ChemSpider	NA	NA	NA	NA	NA	NA	NA	NA	NA	Up	3.19478e+06	8.19085e+06	9.38246e+06	1.08988e+06	2.29652e+06	906633	3.09301e+06	6.15074e+07	4.93684e+07	2.25467e+06	1.38401e+08	1.4095e+08
6.87_264.18379	10.9109	0.0499933	0.286406	1.65384	HS:Control	POS	6.87	264.184	C15 H24 N2 O2	Tetracaine	1.60066e-05	0.060589	NA	level4	ChemSpider	NA	NA	NA	NA	NA	NA	NA	NA	NA	Up	43529.5	23853.5	89852.5	30146.4	36517.9	34873.8	32328.2	282629	130756	42347.5	875210	1.46017e+06
6.927_391.23573	11.6212	0.00300228	0.276631	2.12922	HS:Control	POS	6.927	391.236	C22 H33 N O5	heteratisine	-0.000138145	-0.3531	NA	level4	ChemSpider	NA	NA	NA	NA	NA	NA	NA	NA	NA	Up	34848.3	26269.7	33636.3	131242	45549.4	58767.3	112483	319696	548090	140161	685521	2.03269e+06
6.927_429.30921	16.5358	0.0195905	0.276631	2.04913	HS:Control	POS	6.927	429.309	C23 H43 N O6	Hexadecanedioic acid mono-L-carnitine ester	0.000169448	0.3947	NA	level4	ChemSpider	NA	NA	NA	NA	NA	NA	NA	NA	NA	Up	86713	66112.7	83697.1	94907.2	113340	123662	99293.9	1.35285e+06	1.18311e+06	133268	2.54359e+06	4.08738e+06
6.963_380.21846	29.1065	0.0248964	0.276631	2.13458	HS:Control	POS	6.963	380.218	C21 H32 O6	1-(4-Hydroxy-3-methoxyphenyl)-3,5-decanediyl diacetate	-0.00142666	-3.75221	NA	level4	ChemSpider	NA	NA	NA	NA	NA	NA	NA	NA	NA	Up	346130	296289	470836	374580	447332	488068	411878	5.67091e+06	8.41123e+06	525981	1.48708e+07	4.0641e+07
6.973_268.13109	12.3907	0.00374951	0.276631	2.19623	HS:Control	POS	6.973	268.131	C15 H16 N4 O	Ripazepam	-0.00132101	-4.92671	NA	level4	ChemSpider	NA	NA	NA	NA	NA	NA	NA	NA	NA	Up	52748.7	55166.2	71850.4	61733.1	41944.9	82429	246929	416010	858180	102856	857649	2.0518e+06
7.013_417.27280	139.939	0.0221758	0.276631	2.61002	HS:Control	POS	7.013	417.273	C21 H39 N O7	(2S,3R,4R,5S,6E)-2-Amino-3,4,5-trihydroxy-2-(hydroxymethyl)-14-oxo-6-icosenoic acid	0.000145719	0.349219	NA	level4	ChemSpider	NA	NA	NA	NA	NA	NA	NA	NA	NA	Up	44932.1	35404	40203.5	47649.4	51179.3	54914.5	47964.4	4.23325e+06	4.0059e+06	63754.7	1.08157e+07	1.92163e+07
7.074_356.19866	31.5098	0.0189137	0.276631	2.24388	HS:Control	POS	7.074	356.199	C23 H24 N4	Tampramine	-0.00144073	-4.04473	NA	level4	ChemSpider	NA	NA	NA	NA	NA	NA	NA	NA	NA	Up	517423	437629	480726	638571	716771	740012	789030	1.24273e+07	1.80165e+07	736763	1.89971e+07	6.02987e+07
7.077_396.25146	12.9619	0.0157301	0.276631	1.96138	HS:Control	NEG	7.077	396.251	C22 H36 O6	(5Z,9alpha,11alpha,13E,15S)-11-Acetoxy-9,15-dihydroxyprosta-5,13-dien-1-oic acid	0.00026663	0.672882	NA	level4	ChemSpider	NA	NA	NA	NA	NA	NA	NA	NA	NA	Up	148226	226828	289830	226258	274009	65058.4	355516	2.85322e+06	1.57825e+06	186308	3.00939e+06	7.96321e+06
7.088_454.25472	19.9334	0.0344082	0.276631	1.94337	HS:Control	POS	7.088	454.255	C24 H38 O8	Rhodojaponin IV	-0.00195116	-4.29528	NA	level4	ChemSpider	NA	NA	NA	NA	NA	NA	NA	NA	NA	Up	69775.8	59728.4	71446.1	71951.2	82440.2	79817.2	83029.8	1.73347e+06	245167	86761.6	3.62465e+06	2.90112e+06
7.225_374.20904	18.1519	0.0300651	0.276631	1.90986	HS:Control	POS	7.225	374.209	C22 H30 O5	Methylprednisolone	-0.00028441	-0.760028	NA	level4	ChemSpider	NA	NA	NA	NA	NA	NA	NA	NA	NA	Up	1.10033e+06	962173	951556	1.38276e+06	1.32172e+06	1.44775e+06	1.34649e+06	1.01933e+07	8.0849e+06	1.45071e+06	3.02095e+07	7.8797e+07
7.231_409.24693	39.324	0.0176717	0.276631	2.33476	HS:Control	POS	7.231	409.247	C22 H35 N O6	(5Z)-7-{2-Hydroxy-1-(2-hydroxyethyl)-4-[(1E)-3-hydroxy-1-octen-1-yl]-2-methyl-5-oxo-2,5-dihydro-1H-pyrrol-3-yl}-5-heptenoic acid	0.000497146	1.21478	NA	level4	ChemSpider	NA	NA	NA	NA	NA	NA	NA	NA	NA	Up	90617.1	76106.1	84190.3	110006	125529	108264	138184	2.74119e+06	4.01617e+06	129031	5.14907e+06	1.12128e+07
7.297_376.22508	15.4444	0.0203755	0.276631	2.01251	HS:Control	POS	7.297	376.225	C22 H32 O5	Resolvin D1	0.00011025	0.293042	NA	level4	ChemSpider	NA	NA	NA	NA	NA	NA	NA	NA	NA	Up	494621	432517	427745	621578	594141	586147	605274	7.35679e+06	6.65789e+06	652126	1.06595e+07	2.28226e+07
7.3_447.29859	3.85882	0.0302047	0.276631	1.82307	HS:Control	NEG	7.3	447.299	C26 H41 N O5	N-[(3beta,7beta)-3,7-Dihydroxy-24-oxochol-5-en-24-yl]glycine	0.000112756	0.252082	NA	level4	ChemSpider	NA	NA	NA	NA	NA	NA	NA	NA	NA	Up	32701.3	26220.6	58207.2	38471.5	251260	804633	2.40808e+06	1.16827e+06	286248	215832	246238	350260
7.345_358.21458	19.9854	0.0245237	0.276631	2.05745	HS:Control	NEG	7.345	358.215	C22 H30 O4	cannabidiolic acid	0.000173238	0.483616	NA	level4	ChemSpider	NA	NA	NA	NA	NA	NA	NA	NA	NA	Up	10102.6	39398.8	18949.1	13706.2	16295.1	29456.6	16366.2	280804	349654	28220.6	442252	1.43901e+06
7.348_455.23105	0.503229	0.0135016	0.276631	1.18304	HS:Control	POS	7.348	455.231	C26 H33 N O6	Lacidipine	0.000260075	0.571303	NA	level4	ChemSpider	NA	NA	NA	NA	NA	NA	NA	NA	NA	Down	1.48349e+06	1.54583e+06	1.30051e+06	1.28052e+06	1.05048e+06	606437	644800	779068	444667	1.09577e+06	294920	397874
7.348_486.09786	0.526234	0.0411088	0.277575	1.18928	HS:Control	POS	7.348	486.098	C24 H22 O9 S	(5-Hydroxy-6-isobutyryl-8-methyl-2-oxo-4-phenyl-2H,8H-pyrano[2,3-f]chromen-8-yl)methyl hydrogen sulfate	-0.000589086	-1.21187	NA	level4	ChemSpider	NA	NA	NA	NA	NA	NA	NA	NA	NA	Down	1.69026e+06	1.8238e+06	1.76293e+06	3.65777e+06	3.00391e+06	2.98292e+06	2.93608e+06	921487	697528	2.25747e+06	532181	507513
7.349_488.22023	0.555123	0.0245923	0.276631	1.14335	HS:Control	POS	7.349	488.22	C23 H32 N6 O4 S	vardenafil	-0.000343751	-0.70409	NA	level4	ChemSpider	NA	NA	NA	NA	NA	NA	NA	NA	NA	Down	818094	742454	804716	1.46917e+06	1.15522e+06	1.15002e+06	1.22823e+06	259607	423024	671853	407082	418480
7.35_454.21057	0.551464	0.0443848	0.283357	1.15986	HS:Control	POS	7.35	454.211	C25 H30 N2 O6	?-FNA	0.000185949	0.40939	NA	level4	ChemSpider	NA	NA	NA	NA	NA	NA	NA	NA	NA	Down	9.63725e+06	1.06394e+07	1.16432e+07	1.44658e+07	1.60549e+07	1.35644e+07	1.24619e+07	6.532e+06	3.61657e+06	1.38644e+07	3.00822e+06	2.43097e+06
7.353_470.12564	0.472589	0.0443368	0.283357	1.48391	HS:Control	POS	7.353	470.126	C21 H26 O10 S	1-(10-Butyryl-5,7-dihydroxy-8,8-dimethyl-2-oxo-7,8-dihydro-2H,6H-pyrano[3,2-g]chromen-4-yl)-2-propanyl hydrogen sulfate	0.00097068	2.06473	NA	level4	ChemSpider	NA	NA	NA	NA	NA	NA	NA	NA	NA	Down	835240	852284	862131	1.41481e+06	1.28263e+06	1.3357e+06	1.34412e+06	308735	128889	1.13053e+06	85854.8	112834
7.354_239.15226	11.3805	0.0278393	0.276631	1.79471	HS:Control	POS	7.354	239.152	C13 H21 N O3	Salbutamol	0.000114928	0.480565	NA	level4	ChemSpider	NA	NA	NA	NA	NA	NA	NA	NA	NA	Up	78208.4	68388.7	67634	98282.6	93944.2	92680.2	95704.5	401146	1.24489e+06	103113	622794	3.2128e+06
7.361_422.15001	0.517781	0.0479723	0.284573	1.24996	HS:Control	NEG	7.361	422.15	C24 H26 N2 O S2	Izonsteride	0.00135256	3.204	NA	level4	ChemSpider	NA	NA	NA	NA	NA	NA	NA	NA	NA	Down	586562	484541	592406	1.21851e+06	897694	951164	1.06301e+06	239881	234972	655135	149957	106610
7.382_360.25139	33.4265	0.0301987	0.276631	2.10695	HS:Control	NEG	7.382	360.251	C19 H36 O6	ascr#22	0.000198057	0.549776	NA	level4	ChemSpider	NA	NA	NA	NA	NA	NA	NA	NA	NA	Up	23553.7	22975.3	39002.4	33567.9	36760	72142.3	40082.6	877016	112184	72210	3.51633e+06	3.00349e+06
7.392_345.25149	20.8856	0.0217672	0.276631	2.08898	HS:Control	POS	7.392	345.251	C18 H35 N O5	3-[(3-Hydroxyundecanoyl)oxy]-4-(trimethylammonio)butanoate	-3.20238e-05	-0.092755	NA	level4	ChemSpider	NA	NA	NA	NA	NA	NA	NA	NA	NA	Up	444400	388602	384314	558467	533815	526633	543818	9.02424e+06	5.59959e+06	585913	1.8478e+07	2.50048e+07
7.399_268.07125	0.449017	0.0489864	0.286078	1.11855	HS:Control	POS	7.399	268.071	C9 H17 O7 P	2-Oxo-3-(phosphonooxy)propyl hexanoate	5.5798e-05	0.208146	NA	level4	ChemSpider	NA	NA	NA	NA	NA	NA	NA	NA	NA	Down	919613	406018	570937	1.86772e+06	1.88332e+06	1.43068e+06	955268	226637	572018	471096	473084	480165
7.418_412.24397	40.9269	0.0346484	0.276631	2.21123	HS:Control	NEG	7.418	412.244	C18 H39 N O7 P	(7R)-4,7-Dihydroxy-N,N,N-trimethyl-10-oxo-3,5,9-trioxa-4-phosphanonadecan-1-aminium 4-oxide	-0.0024429	-5.92583	NA	level4	ChemSpider	NA	NA	NA	NA	NA	NA	NA	NA	NA	Up	8430.24	14510.2	42274.5	14272.7	14375.2	14402.9	12933	1.16238e+06	395017	12435.4	1.70472e+06	1.1435e+06
7.422_446.22847	3.39171	0.0446557	0.283357	1.24698	HS:Control	POS	7.422	446.228	C25 H34 O7	clavulone II	-0.00198156	-4.44066	NA	level4	ChemSpider	NA	NA	NA	NA	NA	NA	NA	NA	NA	Up	438008	383012	378786	550434	526137	519058	535995	1.24791e+06	656185	577485	1.97678e+06	4.48696e+06
7.425_368.19686	16.9563	0.0179618	0.276631	2.08474	HS:Control	POS	7.425	368.197	C16 H33 O7 P	(2R)-2-Hydroxy-3-(phosphonooxy)propyl tridecanoate	0.00046576	1.26498	NA	level4	ChemSpider	NA	NA	NA	NA	NA	NA	NA	NA	NA	Up	35649.2	50850.8	72660.3	39341.9	42913.2	39343.4	44202.8	614603	977706	74221.5	1.63111e+06	1.4188e+06
7.43_384.15972	19.8219	0.031632	0.276631	2.06836	HS:Control	POS	7.43	384.16	C19 H28 O6 S	16Î±-Hydroxydehydroepiandrosterone 3-sulfate	-0.000943145	-2.45508	NA	level4	ChemSpider	NA	NA	NA	NA	NA	NA	NA	NA	NA	Up	141438	690002	316304	78243.8	94666	117533	238429	4.36823e+06	6.03279e+06	96544.1	7.00833e+06	1.07632e+07
7.444_416.21769	6.76664	0.0227731	0.276631	1.70749	HS:Control	POS	7.444	416.218	C24 H32 O6	Desonide	-0.00219414	-5.27159	NA	level4	ChemSpider	NA	NA	NA	NA	NA	NA	NA	NA	NA	Up	556877	590165	753917	699813	668922	659922	681456	3.76343e+06	6.92035e+06	734205	5.54412e+06	8.94676e+06
7.46_370.19249	11.6774	0.0334321	0.276631	1.80346	HS:Control	POS	7.46	370.192	C20 H31 Cl O4	(5Z,10Z,14Z,17Z)-9-Chloro-8,12-dihydroxy-5,10,14,17-icosatetraenoic acid	0.00140441	3.79373	NA	level4	ChemSpider	NA	NA	NA	NA	NA	NA	NA	NA	NA	Up	54448.4	64070.6	51316.7	32048.1	36956.9	39059.1	32803.8	630534	779141	58554.7	1.46609e+06	278019
7.463_418.23345	7.71811	0.017716	0.276631	1.79492	HS:Control	POS	7.463	418.233	C24 H34 O6	2066503	-0.00209259	-5.00339	NA	level4	ChemSpider	NA	NA	NA	NA	NA	NA	NA	NA	NA	Up	647068	565823	559579	813154	777260	766802	791824	4.16978e+06	8.30564e+06	853117	7.43022e+06	1.03228e+07
7.489_422.24162	13.4445	0.0279232	0.276631	1.82829	HS:Control	POS	7.489	422.242	C20 H39 O7 P	(2R)-2-Hydroxy-3-(phosphonooxy)propyl (9Z)-9-heptadecenoate	-0.00171513	-4.06195	NA	level4	ChemSpider	NA	NA	NA	NA	NA	NA	NA	NA	NA	Up	66678.1	53607.5	60782.8	76287.4	82314.3	100342	75343.4	260361	589649	126845	1.58743e+06	3.2761e+06
7.514_270.19826	33.5553	0.0483584	0.285633	2.00826	HS:Control	NEG	7.514	270.198	C19 H26 O	17beta-Methylestra-1,3,5(10)-trien-3-ol	-0.000109746	-0.406169	NA	level4	ChemSpider	NA	NA	NA	NA	NA	NA	NA	NA	NA	Up	16089.6	27667.7	12853.4	9733.34	10548.9	10049.8	9048.2	295306	340672	8532.08	844972	1.41886e+06
7.568_582.24807	0.411495	0.0321499	0.276631	1.94524	HS:Control	POS	7.568	582.248	C33 H34 N4 O6	Azelnidipine	0.00023544	0.404364	NA	level4	ChemSpider	NA	NA	NA	NA	NA	NA	NA	NA	NA	Down	2.4454e+06	1.24839e+06	992898	899400	844345	587854	583674	30019.2	93583.7	2.09185e+06	34679.6	54191.9
7.58_583.27964	0.525216	0.0489744	0.286078	1.19264	HS:Control	NEG	7.58	583.28	C21 H41 N7 O12	Dihydrostreptomycin	-0.00167881	-2.87822	NA	level4	ChemSpider	NA	NA	NA	NA	NA	NA	NA	NA	NA	Down	1.81776e+06	1.96375e+06	2.32894e+06	3.58248e+06	3.5847e+06	4.67097e+06	2.58553e+06	826165	830266	3.93688e+06	802215	445836
7.601_411.20250	38.7198	0.0198437	0.276631	2.31196	HS:Control	NEG	7.601	411.202	C17 H34 N O8 P	(2R)-3-{[(2-Aminoethoxy)(hydroxy)phosphoryl]oxy}-2-(hexanoyloxy)propyl hexanoate	0.000294257	0.715602	NA	level4	ChemSpider	NA	NA	NA	NA	NA	NA	NA	NA	NA	Up	11073.6	12134.7	15713	18876.5	20083.9	35397.1	18780.9	581210	602644	25913.9	708800	2.44879e+06
7.601_450.27327	0.198214	0.0138512	0.276631	1.71941	HS:Control	POS	7.601	450.273	C22 H43 O7 P	(2R)-2-Hydroxy-3-(phosphonooxy)propyl (9Z)-9-nonadecenoate	-0.00136852	-3.03931	NA	level4	ChemSpider	NA	NA	NA	NA	NA	NA	NA	NA	NA	Down	1.92293e+06	449666	1.74801e+06	711619	783934	135318	70669	274599	280566	63946.5	76932	373312
7.606_398.20700	3.58522	0.015261	0.276631	1.45405	HS:Control	POS	7.606	398.207	C22 H29 F3 O3	flumedroxone	0.000120022	0.301405	NA	level4	ChemSpider	NA	NA	NA	NA	NA	NA	NA	NA	NA	Up	2.48635e+06	1.00825e+06	1.11961e+06	3.66277e+06	3.38837e+06	3.38029e+06	3.59128e+06	6.07087e+06	1.3771e+07	2.58883e+06	8.94246e+06	1.89775e+07
7.631_181.14679	3.32922	0.0342931	0.276631	1.37641	HS:Control	POS	7.631	181.147	C11 H19 N O	(2E,6Z)-N-Ethyl-2,6-nonadienamide	0.000127193	0.702156	NA	level4	ChemSpider	NA	NA	NA	NA	NA	NA	NA	NA	NA	Up	82490.3	88374.8	47451.3	45120.5	57840.5	277324	151939	187539	157999	147695	180769	1.16694e+06
7.668_408.25118	2.33551	0.033818	0.276631	1.15637	HS:Control	POS	7.668	408.251	C23 H36 O6	Asebotoxin II	-1.23599e-05	-0.0302752	NA	level4	ChemSpider	NA	NA	NA	NA	NA	NA	NA	NA	NA	Up	1.55124e+06	629046	698529	2.28521e+06	2.11401e+06	2.10897e+06	2.2406e+06	3.23503e+06	2.74982e+06	1.61518e+06	3.37248e+06	8.7103e+06
7.683_591.31813	15.7096	0.0264842	0.276631	1.8643	HS:Control	POS	7.683	591.318	C28 H50 N O10 P	(2R)-2-{[(5Z,11alpha,13E,15S)-11,15-Dihydroxy-1,9-dioxoprosta-5,13-dien-1-yl]oxy}-3-hydroxypropyl 2-(trimethylammonio)ethyl phosphate	0.000892397	1.50917	NA	level4	ChemSpider	NA	NA	NA	NA	NA	NA	NA	NA	NA	Up	508070	206028	228786	748462	692391	690739	733853	1.87182e+06	9.31035e+06	529011	5.08078e+06	3.07729e+07
7.691_245.14545	0.310431	0.0314061	0.276631	1.72266	HS:Control	POS	7.691	245.145	C12 H23 N O2 S	S-3-oxodecanoyl cysteamine	0.000496556	2.02556	NA	level4	ChemSpider	NA	NA	NA	NA	NA	NA	NA	NA	NA	Down	3.75892e+06	3.88761e+06	2.59885e+06	1.71033e+07	6.25609e+06	9.78768e+06	7.31363e+06	508195	2.90742e+06	2.12833e+06	400582	212205
7.705_278.09285	0.1422	0.046736	0.283802	1.4388	HS:Control	POS	7.705	278.093	C10 H18 N2 O5 S	Glu-Met	-0.000790696	-2.84327	NA	level4	ChemSpider	NA	NA	NA	NA	NA	NA	NA	NA	NA	Down	264115	107102	3.78208e+06	331579	327957	246152	211586	78213.3	58474.7	219462	44723	106929
7.706_430.23369	3.22611	0.0245119	0.276631	1.35086	HS:Control	POS	7.706	430.234	C25 H34 O6	Budesonide	-0.00184845	-4.29637	NA	level4	ChemSpider	NA	NA	NA	NA	NA	NA	NA	NA	NA	Up	1.04573e+06	424057	470898	1.54052e+06	1.42511e+06	1.42171e+06	1.51045e+06	3.90525e+06	1.82765e+06	1.08884e+06	3.37248e+06	8.7103e+06
7.713_328.22529	16.8533	0.04567	0.283357	1.81671	HS:Control	NEG	7.713	328.225	C18 H32 O5	(10E,15Z)-9,12,13-Trihydroxy-10,15-octadecadienoic acid	0.000316207	0.963386	NA	level4	ChemSpider	NA	NA	NA	NA	NA	NA	NA	NA	NA	Up	1.54019e+06	2.21475e+06	2.44555e+06	2.13422e+06	1.38845e+06	906340	1.53599e+06	1.84172e+07	2.50544e+07	1.03894e+06	4.69814e+07	8.61145e+07
7.726_551.32332	13.9524	0.0209043	0.276631	1.90039	HS:Control	POS	7.726	551.323	C26 H50 N O9 P	(2R)-3-{[(2-Aminoethoxy)(hydroxy)phosphoryl]oxy}-2-[(5-oxopentanoyl)oxy]propyl palmitate	0.000997236	1.80881	NA	level4	ChemSpider	NA	NA	NA	NA	NA	NA	NA	NA	NA	Up	809127	328110	364352	1.19196e+06	1.10267e+06	1.04586e+06	1.1687e+06	4.00451e+06	1.42548e+07	842476	7.7384e+06	3.95497e+07
7.743_308.19879	5.50986	0.049839	0.286328	1.47538	HS:Control	POS	7.743	308.199	C18 H28 O4	5-O-methyl embelin	3.4344e-05	0.111435	NA	level4	ChemSpider	NA	NA	NA	NA	NA	NA	NA	NA	NA	Up	730273	905870	1.73951e+06	392052	663296	422469	489665	3.64197e+06	3.52391e+06	726276	6.31715e+06	1.2043e+07
7.753_358.19014	7.79512	0.0324973	0.276631	1.66021	HS:Control	POS	7.753	358.19	C20 H26 N2 O4	Itopride	0.000884403	2.46909	NA	level4	ChemSpider	NA	NA	NA	NA	NA	NA	NA	NA	NA	Up	44920.2	38604	51367.7	60200.7	71604	53376.5	48754	380635	208233	61535	683130	1.11272e+06
7.804_266.18822	9.29658	0.0190997	0.276631	1.81746	HS:Control	NEG	7.804	266.188	C16 H26 O3	Juvenile hormone III	2.07707e-05	0.0780301	NA	level4	ChemSpider	NA	NA	NA	NA	NA	NA	NA	NA	NA	Up	69486.4	52214	85064	42870.2	49211.9	34955	59939.2	293316	485277	77700.4	734268	1.45271e+06
7.807_306.21950	4.54557	0.0262652	0.276631	1.48726	HS:Control	POS	7.807	306.219	C19 H30 O3	oxandrolone	4.79305e-06	0.0156523	NA	level4	ChemSpider	NA	NA	NA	NA	NA	NA	NA	NA	NA	Up	451524	522619	314865	878986	661131	666782	522247	2.9633e+06	2.31695e+06	725612	2.13796e+06	7.2248e+06
7.808_395.26712	8.34013	0.046305	0.283802	1.69512	HS:Control	POS	7.808	395.267	C22 H37 N O5	Prostaglandin D2 Ethanolamide	-4.89888e-05	-0.123939	NA	level4	ChemSpider	NA	NA	NA	NA	NA	NA	NA	NA	NA	Up	332330	562550	1.40632e+06	251427	308763	378463	327357	6.96218e+06	3.74382e+06	353499	4.68291e+06	1.09511e+07
7.882_482.24202	0.585144	0.0453699	0.283357	1.03895	HS:Control	POS	7.882	482.242	C25 H39 O7 P	(2R)-2-Hydroxy-3-(phosphonooxy)propyl (4Z,7Z,10Z,13Z,16E,19E)-4,7,10,13,16,19-docosahexaenoate	-0.00131771	-2.73246	NA	level4	ChemSpider	NA	NA	NA	NA	NA	NA	NA	NA	NA	Down	1.28322e+07	1.38221e+07	1.26515e+07	2.35601e+07	2.05121e+07	1.95426e+07	1.53372e+07	9.06377e+06	6.80498e+06	1.97114e+07	4.69114e+06	4.61483e+06
7.888_110.10964	0.574492	0.0325709	0.276631	1.08358	HS:Control	POS	7.888	110.11	C8 H14	1733342	8.95256e-05	0.81306	NA	level4	ChemSpider	NA	NA	NA	NA	NA	NA	NA	NA	NA	Down	1.85216e+06	1.72077e+06	2.67048e+06	2.90981e+06	3.17082e+06	2.56494e+06	2.69408e+06	1.01894e+06	691871	2.12045e+06	1.28521e+06	743035
7.912_380.21772	19.9196	0.027182	0.276631	2.03306	HS:Control	NEG	7.912	380.218	C22 H30 F2 O3	4,4-difluoro-17?-hydroxyandrost-5-en-3-one propionate	0.00141839	3.73048	NA	level4	ChemSpider	NA	NA	NA	NA	NA	NA	NA	NA	NA	Up	215975	300390	368286	548066	275214	301213	286421	6.22459e+06	6.8532e+06	351723	7.75402e+06	1.85514e+07
7.92_284.17764	5.207	0.0130309	0.276631	1.66716	HS:Control	POS	7.92	284.178	C19 H24 O2	Boldione	7.30242e-06	0.0256967	NA	level4	ChemSpider	NA	NA	NA	NA	NA	NA	NA	NA	NA	Up	388884	967768	486285	1.33559e+06	569412	574278	1.09911e+06	4.74201e+06	5.74777e+06	624947	3.73942e+06	6.55251e+06
7.933_252.17263	10.2598	0.0405824	0.277575	1.74705	HS:Control	POS	7.933	252.173	C15 H24 O3	Cuauhtemone	8.45098e-05	0.335127	NA	level4	ChemSpider	NA	NA	NA	NA	NA	NA	NA	NA	NA	Up	112001	306903	497799	654097	422446	137073	142350	3.90228e+06	4.87555e+06	389042	5.75256e+06	6.79489e+06
7.953_322.19347	9.68605	0.0295037	0.276631	1.7427	HS:Control	POS	7.953	322.193	C19 H27 F O3	12alpha-Fluoro-11beta,17beta-dihydroxyandrost-4-en-3-one	-0.000954811	-2.96346	NA	level4	ChemSpider	NA	NA	NA	NA	NA	NA	NA	NA	NA	Up	596399	690305	415891	1.16102e+06	873260	880723	689814	4.2042e+06	1.57604e+07	958430	4.24294e+06	1.88705e+07
7.972_575.32271	63.1192	0.0155037	0.276631	2.46177	HS:Control	POS	7.972	575.323	C28 H50 N O9 P	(2R)-2-{[(5Z,8Z,10E,12S,14Z)-12-Hydroperoxy-5,8,10,14-icosatetraenoyl]oxy}-3-hydroxypropyl 2-(trimethylammonio)ethyl phosphate	0.000395022	0.68661	NA	level4	ChemSpider	NA	NA	NA	NA	NA	NA	NA	NA	NA	Up	36046.9	151207	112338	49199.6	49995	98888	160482	1.78544e+06	6.17363e+06	96453.7	2.8879e+06	2.03089e+07
7.986_251.18849	46.7443	0.00787373	0.276631	2.48744	HS:Control	NEG	7.986	251.188	C15 H25 N O2	(-)-Nupharamine	-3.89411e-05	-0.155027	NA	level4	ChemSpider	NA	NA	NA	NA	NA	NA	NA	NA	NA	Up	8941.43	9031.29	4651.43	7358.04	7625.13	7491.39	11901.6	115047	199811	38937	363925	1.37849e+06
7.991_268.16753	0.533466	0.0217839	0.276631	1.01556	HS:Control	POS	7.991	268.168	C15 H24 O4	(3aR,4R,5R,6aS)-5-Hydroxy-4-[(1E,3S)-3-hydroxy-1-octen-1-yl]hexahydro-2H-cyclopenta[b]furan-2-one	7.25166e-05	0.270415	NA	level4	ChemSpider	NA	NA	NA	NA	NA	NA	NA	NA	NA	Down	3.6094e+06	5.4093e+06	8.80888e+06	9.57867e+06	6.64443e+06	1.18436e+07	5.10628e+06	2.71465e+06	3.15692e+06	5.67693e+06	3.6969e+06	4.13133e+06
8.024_362.24579	7.22574	0.0214394	0.276631	1.74767	HS:Control	POS	8.024	362.246	C22 H34 O4	TI1090000	8.20655e-05	0.226547	NA	level4	ChemSpider	NA	NA	NA	NA	NA	NA	NA	NA	NA	Up	197134	368150	473941	483481	602979	546437	346537	2.94274e+06	4.47672e+06	605308	4.5551e+06	6.38165e+06
8.024_397.28290	14.1393	0.0406331	0.277575	1.85793	HS:Control	POS	8.024	397.283	C22 H39 N O5	MFCD03411991	8.12123e-05	0.204419	NA	level4	ChemSpider	NA	NA	NA	NA	NA	NA	NA	NA	NA	Up	81841.9	266979	394763	111704	112421	124947	130068	2.04829e+06	2.73505e+06	111419	3.2994e+06	7.12518e+06
8.031_365.23351	45.9708	0.0231102	0.276631	2.32298	HS:Control	POS	8.031	365.234	C17 H36 N O5 P	Sphingosine-1-phosphate (d17:1)	0.000403098	1.10367	NA	level4	ChemSpider	NA	NA	NA	NA	NA	NA	NA	NA	NA	Up	29618.3	27966.7	28314.5	38348	39760.8	38325.6	38121.7	1.39479e+06	1.62119e+06	36678.4	1.56009e+06	4.65059e+06
8.031_370.18883	17.3552	0.0218041	0.276631	2.05394	HS:Control	POS	8.031	370.189	C21 H26 N2 O4	Samidorphan	-0.000427853	-1.15577	NA	level4	ChemSpider	NA	NA	NA	NA	NA	NA	NA	NA	NA	Up	29854.2	28189.4	28540	38653.3	40077.4	38630.7	38425.3	575323	720669	36970.5	705591	1.46252e+06
8.044_236.17767	11.5038	0.0163814	0.276631	1.9964	HS:Control	POS	8.044	236.178	C15 H24 O2	DO0750000	4.42602e-05	0.187402	NA	level4	ChemSpider	NA	NA	NA	NA	NA	NA	NA	NA	NA	Up	761141	906983	1.32923e+06	813929	910618	1.20688e+06	1.13996e+06	1.42962e+07	1.49922e+07	1.23143e+06	1.86617e+07	1.7882e+07
8.044_422.27821	8.24531	0.0459102	0.28357	1.55742	HS:Control	POS	8.044	422.278	C21 H43 O6 P	1-octadecylglycerone 3-phosphate	-0.00151646	-3.59112	NA	level4	ChemSpider	NA	NA	NA	NA	NA	NA	NA	NA	NA	Up	35284.6	33017.4	33731.4	45684.4	45115.7	45657.7	43834.5	104607	536020	43695.4	156248	1.08203e+06
8.099_327.24094	7.17091	0.0271208	0.276631	1.67694	HS:Control	POS	8.099	327.241	C18 H33 N O4	Cxa-10	-1.9174e-05	-0.0585929	NA	level4	ChemSpider	NA	NA	NA	NA	NA	NA	NA	NA	NA	Up	529738	489703	578836	895068	941600	949521	902785	7.33538e+06	1.63817e+06	869054	7.5879e+06	1.31073e+07
8.122_404.16326	0.269136	0.0201516	0.276631	1.45266	HS:Control	POS	8.122	404.163	C25 H24 O5	osajin	0.000881877	2.18199	NA	level4	ChemSpider	NA	NA	NA	NA	NA	NA	NA	NA	NA	Down	2.37957e+06	848019	255841	395613	1.1278e+06	419681	399024	184743	172344	384115	145190	175056
8.14_254.18828	2.21257	0.0152313	0.276631	1.1992	HS:Control	POS	8.14	254.188	C15 H26 O3	prohydrojasmon	8.92978e-05	0.351306	NA	level4	ChemSpider	NA	NA	NA	NA	NA	NA	NA	NA	NA	Up	916036	951480	1.73053e+06	665058	1.19414e+06	1.17597e+06	1.05517e+06	2.34822e+06	2.43507e+06	1.44459e+06	3.81551e+06	3.57788e+06
8.148_330.21923	6.88305	0.0301036	0.276631	1.60275	HS:Control	POS	8.148	330.219	C21 H30 O3	Hydroxyprogesterone	-0.000263837	-0.798974	NA	level4	ChemSpider	NA	NA	NA	NA	NA	NA	NA	NA	NA	Up	830296	767548	907252	1.4029e+06	1.47584e+06	1.48825e+06	1.415e+06	5.89624e+06	6.35575e+06	1.36213e+06	3.38874e+06	2.88831e+07
8.159_378.23958	3.71224	0.0458706	0.283499	1.27151	HS:Control	POS	8.159	378.24	C22 H34 O5	MFCD28125819	-0.00104284	-2.75708	NA	level4	ChemSpider	NA	NA	NA	NA	NA	NA	NA	NA	NA	Up	1.44948e+06	1.33993e+06	1.58382e+06	2.4491e+06	2.57642e+06	2.5981e+06	2.47021e+06	1.96402e+06	1.333e+07	2.37792e+06	1.04019e+07	1.39912e+07
8.167_366.23972	24.7911	0.0236525	0.276631	2.12571	HS:Control	POS	8.167	366.24	C21 H34 O5	tetrahydrocortisol	-0.000906179	-2.47427	NA	level4	ChemSpider	NA	NA	NA	NA	NA	NA	NA	NA	NA	Up	293312	303662	312299	476247	559275	487106	416418	7.23778e+06	8.65081e+06	451623	1.67042e+07	2.68287e+07
8.184_310.21439	22.5979	0.0285756	0.276631	2.05312	HS:Control	POS	8.184	310.214	C18 H30 O4	13(S)-HpOTrE	-2.4061e-05	-0.0775623	NA	level4	ChemSpider	NA	NA	NA	NA	NA	NA	NA	NA	NA	Up	3.88666e+06	4.7093e+06	4.55792e+06	4.26492e+06	3.22864e+06	3.50012e+06	3.15501e+06	6.70983e+07	7.82135e+07	4.96532e+06	1.58027e+08	2.34225e+08
8.198_441.25511	12.3053	0.0375781	0.277298	1.79672	HS:Control	POS	8.198	441.255	C23 H39 N O5 S	Leukotriene E3	0.000214521	0.486161	NA	level4	ChemSpider	NA	NA	NA	NA	NA	NA	NA	NA	NA	Up	32452.4	93434.2	53797.2	42687.2	47277.6	44739.7	42441.7	480194	501830	43373.3	1.03145e+06	1.76937e+06
8.208_342.21917	9.1977	0.0253544	0.276631	1.80248	HS:Control	POS	8.208	342.219	C22 H30 O3	Megestrol	-0.000320926	-0.937778	NA	level4	ChemSpider	NA	NA	NA	NA	NA	NA	NA	NA	NA	Up	1.42529e+06	3.06999e+06	1.2825e+06	1.98316e+06	2.08626e+06	2.10381e+06	2.00026e+06	2.06061e+07	2.07944e+07	1.92552e+06	1.86931e+07	4.59023e+07
8.216_392.25621	28.776	0.0210768	0.276631	2.20269	HS:Control	POS	8.216	392.256	C23 H36 O5	5722	-6.48044e-05	-0.165209	NA	level4	ChemSpider	NA	NA	NA	NA	NA	NA	NA	NA	NA	Up	90952.4	76700.2	83374.4	110978	119251	106233	125005	3.13534e+06	2.54143e+06	113697	1.9047e+06	9.08543e+06
8.22_340.20387	7.36584	0.0188168	0.276631	1.73894	HS:Control	POS	8.22	340.204	C22 H28 O3	Norethisterone acetate	2.9853e-05	0.0877505	NA	level4	ChemSpider	NA	NA	NA	NA	NA	NA	NA	NA	NA	Up	423592	523220	586945	893777	825779	863488	961639	4.53999e+06	3.21343e+06	762354	5.43345e+06	1.54128e+07
8.224_422.23073	30.5145	0.0348835	0.276631	2.13703	HS:Control	NEG	8.224	422.231	C23 H34 O7	Picrasin C	0.000273117	0.646844	NA	level4	ChemSpider	NA	NA	NA	NA	NA	NA	NA	NA	NA	Up	20723.4	53419	52799.3	8972.29	13795.8	9097.99	22156.2	819572	938767	12062.2	626954	2.42643e+06
8.226_412.20189	34.7416	0.0447656	0.283357	2.12955	HS:Control	NEG	8.226	412.202	C28 H28 O3	Adapalene	-0.00195741	-4.74866	NA	level4	ChemSpider	NA	NA	NA	NA	NA	NA	NA	NA	NA	Up	18177.6	53194.1	61031.3	8699.77	8831.37	8821.65	19276	1.00857e+06	1.09942e+06	7540.99	742289	2.63832e+06
8.238_579.31788	29.6427	0.0318661	0.276631	2.08767	HS:Control	NEG	8.238	579.318	C27 H50 N O10 P	(7R)-1-Amino-4-hydroxy-7-{[(9Z)-9-octadecenoyloxy]methyl}-9-oxo-3,5,8-trioxa-4-phosphadodecan-12-oic acid 4-oxide	0.00065154	1.12467	NA	level4	ChemSpider	NA	NA	NA	NA	NA	NA	NA	NA	NA	Up	7860.79	12879.5	34877.1	13236.4	14886.3	13421.9	16954.9	283777	391931	11473.4	348121	1.82789e+06
8.253_196.07389	0.441687	0.0258394	0.276631	1.16326	HS:Control	POS	8.253	196.074	C10 H12 O4	CU8460000	0.000333484	1.70081	NA	level4	ChemSpider	NA	NA	NA	NA	NA	NA	NA	NA	NA	Down	403496	340564	1.31484e+06	672952	1.29532e+06	748849	643261	222878	198399	318961	441941	284065
8.272_276.17258	2.37452	0.0299367	0.276631	1.30119	HS:Control	POS	8.272	276.173	C17 H24 O3	cyclandelate	3.69801e-05	0.133902	NA	level4	ChemSpider	NA	NA	NA	NA	NA	NA	NA	NA	NA	Up	2.49421e+06	3.95767e+06	1.7991e+06	4.86883e+06	4.53679e+06	1.41573e+07	3.69461e+06	1.18022e+07	1.10703e+07	1.3044e+07	2.38855e+07	1.2046e+07
8.277_298.15451	0.43828	0.0366754	0.277034	1.2863	HS:Control	POS	8.277	298.155	C15 H18 N6 O	Olomoucine	0.000296161	0.993316	NA	level4	ChemSpider	NA	NA	NA	NA	NA	NA	NA	NA	NA	Down	4.88859e+06	4.98176e+06	1.72939e+07	1.10438e+07	1.35593e+07	9.15321e+06	8.84635e+06	2.43939e+06	1.80189e+06	7.98652e+06	4.42405e+06	1.20205e+06
8.301_324.23010	9.95016	0.00843746	0.276631	2.04166	HS:Control	POS	8.301	324.23	C19 H32 O4	UNII:74D1OHC38H	3.59283e-05	0.110811	NA	level4	ChemSpider	NA	NA	NA	NA	NA	NA	NA	NA	NA	Up	274082	1.96131e+06	1.40813e+06	542633	466201	1.02344e+06	1.1683e+06	7.96022e+06	1.13189e+07	1.30102e+06	1.8667e+07	1.60596e+07
8.311_329.25666	48.1072	0.0238684	0.276631	2.34533	HS:Control	POS	8.311	329.257	C18 H35 N O4	Commendamide	4.68358e-05	0.142247	NA	level4	ChemSpider	NA	NA	NA	NA	NA	NA	NA	NA	NA	Up	2.33337e+06	3.41889e+06	3.81411e+06	3.58072e+06	2.26763e+06	3.27507e+06	2.44993e+06	1.41515e+08	1.67904e+08	4.35353e+06	2.35308e+08	3.47585e+08
8.315_308.23519	22.429	0.0318386	0.276631	2.03845	HS:Control	POS	8.315	308.235	C19 H32 O3	9-(3-Methyl-5-pentyl-2-furyl)nonanoic acid	4.18496e-05	0.135772	NA	level4	ChemSpider	NA	NA	NA	NA	NA	NA	NA	NA	NA	Up	548946	2.06053e+06	1.07178e+06	1.01545e+06	551459	830665	858642	2.49447e+07	3.70192e+07	740696	5.60747e+07	1.67041e+07
8.321_226.15703	43.2538	0.0229304	0.276631	2.31704	HS:Control	POS	8.321	226.157	C13 H22 O3	(−)-trans-Methyl dihydrojasmonate	0.000134864	0.59633	NA	level4	ChemSpider	NA	NA	NA	NA	NA	NA	NA	NA	NA	Up	1.06103e+06	2.15719e+06	2.17388e+06	2.40264e+06	1.29146e+06	2.10128e+06	1.63323e+06	6.77882e+07	8.79671e+07	2.37037e+06	1.13813e+08	2.10329e+08
8.321_312.23010	23.4724	0.0386686	0.277575	1.98199	HS:Control	POS	8.321	312.23	C18 H32 O4	15,16-DiHODE	3.88413e-05	0.1244	NA	level4	ChemSpider	NA	NA	NA	NA	NA	NA	NA	NA	NA	Up	1.61002e+07	1.10706e+07	9.81065e+06	1.71501e+07	1.02932e+07	7.54252e+06	8.09544e+06	2.43517e+08	2.99911e+08	9.48995e+06	4.54572e+08	6.7366e+08
8.322_326.24581	33.0469	0.0314953	0.276631	2.1499	HS:Control	POS	8.322	326.246	C19 H34 O4	2,4-dihydroxyheptadec-16-ynyl acetate	9.91545e-05	0.303926	NA	level4	ChemSpider	NA	NA	NA	NA	NA	NA	NA	NA	NA	Up	548946	2.06053e+06	1.07178e+06	1.01545e+06	551459	830665	858642	2.49447e+07	3.07585e+07	740696	5.04491e+07	9.31347e+07
8.323_535.32823	46.0713	0.0181045	0.276631	2.35731	HS:Control	POS	8.323	535.328	C26 H50 N O8 P	1-[(9Z)-hexadecenoyl]-2-acetyl-sn-glycero-3-phosphocholine	0.000830718	1.55179	NA	level4	ChemSpider	NA	NA	NA	NA	NA	NA	NA	NA	NA	Up	50815.5	581777	606837	361479	288286	523818	743416	9.62141e+06	2.21442e+07	284631	9.44023e+06	6.89367e+07
8.323_557.31056	24.409	0.031097	0.276631	2.00997	HS:Control	POS	8.323	557.311	C28 H48 N O8 P	(2R)-3-[(3E)-3,5-Hexadienoyloxy]-2-[(11E)-11,13-tetradecadienoyloxy]propyl 2-(trimethylammonio)ethyl phosphate	-0.00119278	-2.14025	NA	level4	ChemSpider	NA	NA	NA	NA	NA	NA	NA	NA	NA	Up	63746.6	376732	343464	138394	186805	241122	390645	1.92579e+06	6.9474e+06	141250	1.76654e+06	2.17869e+07
8.329_212.14142	32.9483	0.0185276	0.276631	2.30097	HS:Control	POS	8.329	212.141	C12 H20 O3	Traumatin	0.000174298	0.821614	NA	level4	ChemSpider	NA	NA	NA	NA	NA	NA	NA	NA	NA	Up	394291	782962	725079	676712	707795	837651	820784	2.20467e+07	2.54065e+07	851778	3.67107e+07	5.00585e+07
8.329_506.36140	96.9674	0.0264982	0.276631	2.4289	HS:Control	POS	8.329	506.361	C30 H50 O6	Olean-12-ene-3,16,21,22,23,28-hexol	0.000659424	1.30228	NA	level4	ChemSpider	NA	NA	NA	NA	NA	NA	NA	NA	NA	Up	31444.5	24935.2	26652.9	33365.7	34639.6	38193.9	35536.1	1.09839e+06	1.89629e+06	33822.8	5.15696e+06	1.01283e+07
8.331_488.35051	95.7867	0.0265141	0.276631	2.42555	HS:Control	POS	8.331	488.351	C30 H48 O5	Asiatic acid	0.000331917	0.67967	NA	level4	ChemSpider	NA	NA	NA	NA	NA	NA	NA	NA	NA	Up	31833.6	25243.7	26982.7	33778.6	35068.2	38666.6	35975.9	1.09839e+06	1.89629e+06	34241.4	5.15696e+06	1.01283e+07
8.332_382.21437	13.7949	0.0428032	0.278946	1.86832	HS:Control	POS	8.332	382.214	C24 H30 O4	7-((6-Hydroxy-5,5,8a-trimethyl-2-methylenedecahydro-1-naphthalenyl)methoxy)-2H-chromen-2-one	-3.67601e-05	-0.0961766	NA	level4	ChemSpider	NA	NA	NA	NA	NA	NA	NA	NA	NA	Up	58915.5	74306.6	88850.5	40317.6	44852.9	161695	69106.8	1.63704e+06	785525	40878.9	1.21401e+06	2.72238e+06
8.337_154.09951	9.1694	0.00892373	0.276631	1.99644	HS:Control	POS	8.337	154.1	C9 H14 O2	RI2735000	0.000134831	0.874962	NA	level4	ChemSpider	NA	NA	NA	NA	NA	NA	NA	NA	NA	Up	2.2297e+06	1.07487e+07	6.45157e+06	3.51767e+06	3.54448e+06	5.24477e+06	3.86381e+06	3.99908e+07	4.66036e+07	1.81448e+07	7.73936e+07	1.05012e+08
8.343_186.12576	8.55719	0.00214583	0.276631	2.07929	HS:Control	POS	8.343	186.126	C10 H18 O3	Queen Bee Acid	0.000167871	0.901922	NA	level4	ChemSpider	NA	NA	NA	NA	NA	NA	NA	NA	NA	Up	1.80002e+06	1.13827e+06	1.82245e+06	8.714e+06	3.56126e+06	2.8179e+06	9.01889e+06	2.30637e+07	2.80401e+07	4.86228e+06	4.20059e+07	6.29027e+07
8.356_416.25439	23.5808	0.0312538	0.276631	2.08304	HS:Control	POS	8.356	416.254	C21 H32 N6 O3	Alfentanil	0.000805159	1.9343	NA	level4	ChemSpider	NA	NA	NA	NA	NA	NA	NA	NA	NA	Up	93805	193927	189300	106148	109676	103164	123024	4.30808e+06	3.63162e+06	98653.6	3.37127e+06	7.23816e+06
8.366_282.19831	0.360626	0.00733118	0.276631	1.3646	HS:Control	POS	8.366	282.198	C20 H26 O	dehydroretinaldehyde	-5.81597e-05	-0.206095	NA	level4	ChemSpider	NA	NA	NA	NA	NA	NA	NA	NA	NA	Down	2.63856e+07	1.7997e+07	1.43888e+07	5.51138e+06	9.64569e+06	1.94937e+07	4.23878e+06	3.17589e+06	7.73613e+06	7.35053e+06	5.82786e+06	5.36132e+06
8.381_316.26148	1.8602	0.0208942	0.276631	1.03467	HS:Control	NEG	8.381	316.261	C18 H36 O4	9,10-Dihydroxystearic acid	0.000121831	0.385222	NA	level4	ChemSpider	NA	NA	NA	NA	NA	NA	NA	NA	NA	Up	1.96144e+06	1.43528e+06	2.24471e+06	1.06996e+06	1.60094e+06	1.16098e+06	2.11935e+06	3.70778e+06	2.0947e+06	1.53917e+06	3.77912e+06	4.38218e+06
8.443_439.32997	0.191256	0.00959577	0.276631	1.69533	HS:Control	POS	8.443	439.33	C25 H45 N O5	3-hydroxylinoleoylcarnitine	0.000197384	0.449285	NA	level4	ChemSpider	NA	NA	NA	NA	NA	NA	NA	NA	NA	Down	4.16354e+06	1.56025e+07	2.41723e+06	3.19477e+06	2.27514e+06	1.32562e+06	1.29069e+06	670689	973529	596549	818378	1.19253e+06
8.452_359.26717	52.1622	0.0498524	0.286328	2.04559	HS:Control	POS	8.452	359.267	C19 H37 N O5	3-hydroxydodecanoylcarnitine	-2.50534e-06	-0.00697349	NA	level4	ChemSpider	NA	NA	NA	NA	NA	NA	NA	NA	NA	Up	92495.6	101860	165403	93563.7	81334.2	78892.4	82693.9	2.84195e+06	643676	82522.6	1.41247e+07	1.42285e+07
8.456_543.26132	0.391673	0.0293802	0.276631	1.60138	HS:Control	POS	8.456	543.261	C26 H42 N O9 P	O-(Hydroxy{(2R)-2-hydroxy-3-[(5Z,8Z,11Z,14Z,17Z)-5,8,11,14,17-icosapentaenoyloxy]propoxy}phosphoryl)-L-serine	0.00160093	2.9469	NA	level4	ChemSpider	NA	NA	NA	NA	NA	NA	NA	NA	NA	Down	1.6239e+06	1.22099e+06	1.56823e+06	3.43707e+06	3.49524e+06	3.2473e+06	1.56166e+06	352846	423060	3.00769e+06	232376	137955
8.502_128.06267	6.00733	0.0130308	0.276631	1.7459	HS:Control	POS	8.502	128.063	C10 H8	Naphthalene	6.94191e-05	0.542071	NA	level4	ChemSpider	NA	NA	NA	NA	NA	NA	NA	NA	NA	Up	1.09409e+06	1.6422e+06	1.21916e+06	1.25814e+06	1.39902e+06	1.27962e+06	1.71633e+06	7.555e+06	8.41653e+06	1.76011e+06	1.01865e+07	1.77767e+07
8.502_374.17601	12.3211	0.0162298	0.276631	1.99377	HS:Control	POS	8.502	374.176	C21 H27 Cl N2 O2	Hydroxyzine	-9.37658e-05	-0.250593	NA	level4	ChemSpider	NA	NA	NA	NA	NA	NA	NA	NA	NA	Up	40386	35899.5	37423.2	47212.6	47548.7	50009.1	56538.5	456551	630226	53960.6	881664	1.1058e+06
8.505_340.24211	5.24993	0.0466085	0.283802	1.48763	HS:Control	NEG	8.505	340.242	C20 H33 F O3	9-fluoro-17-methyl-5beta-androstane-3alpha,11beta,17beta-triol	0.000733298	2.15523	NA	level4	ChemSpider	NA	NA	NA	NA	NA	NA	NA	NA	NA	Up	1.0375e+06	2.59016e+06	3.08103e+06	1.45001e+06	1.7401e+06	1.29232e+06	1.47775e+06	1.24171e+07	1.16114e+07	1.22219e+06	1.44968e+07	1.75273e+07
8.506_324.20888	21.7549	0.0273151	0.276631	2.06773	HS:Control	POS	8.506	324.209	C22 H28 O2	Etonogestrel	-4.66233e-05	-0.143806	NA	level4	ChemSpider	NA	NA	NA	NA	NA	NA	NA	NA	NA	Up	2.00867e+06	1.5709e+06	1.72862e+06	616814	651568	329696	1.43394e+06	2.63165e+07	3.11078e+07	612297	2.09809e+07	6.97939e+07
8.511_382.21196	12.6005	0.026773	0.276631	1.93243	HS:Control	POS	8.511	382.212	C17 H35 O7 P	1-Myristoyl-sn-glycerol 3-phosphate	-7.71256e-05	-0.201788	NA	level4	ChemSpider	NA	NA	NA	NA	NA	NA	NA	NA	NA	Up	1.78261e+06	3.24505e+06	2.23081e+06	413878	1.35973e+06	1.72193e+06	1.67839e+06	2.31253e+07	2.91374e+07	1.37492e+06	2.04735e+07	5.9716e+07
8.515_618.46760	83.4004	0.0324833	0.276631	2.38605	HS:Control	NEG	8.515	618.468	C34 H66 O9	(25S,27R)-25,27-Dihydroxy-3-oxooctacosyl alpha-D-glucopyranoside	-0.0030796	-4.97938	NA	level4	ChemSpider	NA	NA	NA	NA	NA	NA	NA	NA	NA	Up	1719.08	2821.82	6048.13	2765.1	2938.01	2603.27	2488.9	183168	217028	2344.13	386548	784310
8.523_377.25663	18.5799	0.0265126	0.276631	2.02594	HS:Control	POS	8.523	377.257	C22 H35 N O4	Karakoline	1.75548e-05	0.0465327	NA	level4	ChemSpider	NA	NA	NA	NA	NA	NA	NA	NA	NA	Up	553310	1.51023e+06	994393	429171	741032	184026	693682	1.4383e+07	1.92363e+07	509172	1.17799e+07	3.53753e+07
8.541_493.28066	4.45889	0.0410195	0.277575	1.35099	HS:Control	POS	8.541	493.281	C30 H39 N O5	Cytochalasin H	-0.00216645	-4.3919	NA	level4	ChemSpider	NA	NA	NA	NA	NA	NA	NA	NA	NA	Up	191234	160840	173286	240044	252060	249463	295698	348482	832436	232185	786176	3.15411e+06
8.561_262.15693	0.46317	0.0118553	0.276631	1.32101	HS:Control	POS	8.561	262.157	C16 H22 O3	Homosalate	4.02026e-05	0.153353	NA	level4	ChemSpider	NA	NA	NA	NA	NA	NA	NA	NA	NA	Down	4.02834e+07	3.51197e+07	3.05322e+07	6.28296e+07	5.03261e+07	5.9174e+07	3.81899e+07	1.62638e+07	1.08641e+07	3.73024e+07	1.5945e+07	1.03187e+07
8.584_121.01983	0.60225	0.00882661	0.276631	1.06348	HS:Control	POS	8.584	121.02	C3 H7 N O2 S	L-(+)-Cysteine	8.20858e-05	0.678284	NA	level4	ChemSpider	NA	NA	NA	NA	NA	NA	NA	NA	NA	Down	3.10856e+06	2.15355e+06	1.92679e+06	2.54398e+06	2.32692e+06	2.30461e+06	2.13056e+06	1.12206e+06	1.28822e+06	2.05032e+06	972179	1.08763e+06
8.585_325.20747	0.568	0.0116494	0.276631	1.13192	HS:Control	POS	8.585	325.207	C18 H31 N O2 S	Farnesylcysteine	-7.54866e-05	-0.232118	NA	level4	ChemSpider	NA	NA	NA	NA	NA	NA	NA	NA	NA	Down	1.55151e+07	1.0871e+07	1.04659e+07	1.32953e+07	1.20897e+07	1.20262e+07	1.08189e+07	5.97665e+06	5.73042e+06	1.08312e+07	4.21731e+06	4.60705e+06
8.592_374.24578	14.2378	0.0236652	0.276631	1.94782	HS:Control	POS	8.592	374.246	C23 H34 O4	Digitoxigenin	7.5438e-05	0.201574	NA	level4	ChemSpider	NA	NA	NA	NA	NA	NA	NA	NA	NA	Up	115752	97354.9	104888	145296	152569	150997	142355	1.4946e+06	1.6394e+06	140539	1.9763e+06	5.52515e+06
8.616_353.25634	13.2872	0.0307372	0.276631	1.94174	HS:Control	POS	8.616	353.256	C20 H35 N O4	3-Oxo-N-[(3S)-2-oxotetrahydro-3-furanyl]hexadecanamide	-0.000269819	-0.763804	NA	level4	ChemSpider	NA	NA	NA	NA	NA	NA	NA	NA	NA	Up	520272	1.14645e+06	860939	164742	169607	435705	316485	6.74527e+06	1.01093e+07	476906	1.011e+07	1.60594e+07
8.637_322.21416	1.82503	0.00783786	0.276631	1.07866	HS:Control	POS	8.637	322.214	C19 H30 O4	Decylubiquinone	-0.000248562	-0.771417	NA	level4	ChemSpider	NA	NA	NA	NA	NA	NA	NA	NA	NA	Up	1.71832e+06	2.64055e+06	1.65486e+06	1.22351e+06	1.42524e+06	1.16766e+06	1.78087e+06	2.87243e+06	3.64949e+06	2.14455e+06	3.29815e+06	4.19479e+06
8.679_414.26191	41.3026	0.0347777	0.276631	2.21286	HS:Control	NEG	8.679	414.262	C22 H38 O7	Ascorbyl palmitate	0.0001529	0.36909	NA	level4	ChemSpider	NA	NA	NA	NA	NA	NA	NA	NA	NA	Up	23385.8	49248.1	63614.5	6989.02	11286.7	16173.7	14256.9	1.36936e+06	332670	25315.5	1.84223e+06	3.46643e+06
8.682_400.26137	18.7098	0.0120482	0.276631	2.2121	HS:Control	POS	8.682	400.261	C25 H36 O4	(+)-Ophiobolin A	5.97199e-06	0.0149202	NA	level4	ChemSpider	NA	NA	NA	NA	NA	NA	NA	NA	NA	Up	107438	92522.5	102626	152952	166779	159949	141462	4.08404e+06	1.84996e+06	292611	2.72458e+06	5.54342e+06
8.688_356.25637	8.31559	0.0376443	0.277298	1.65503	HS:Control	POS	8.688	356.256	C20 H36 O5	PGF1?	9.69153e-05	0.272038	NA	level4	ChemSpider	NA	NA	NA	NA	NA	NA	NA	NA	NA	Up	173835	262175	347053	262107	269848	258797	228885	1.14281e+06	3.08433e+06	241196	4.7037e+06	3.68627e+06
8.737_285.17252	24.2372	0.0131867	0.276631	2.20209	HS:Control	POS	8.737	285.173	C18 H23 N O2	Isococculidine	-0.000354545	-1.24326	NA	level4	ChemSpider	NA	NA	NA	NA	NA	NA	NA	NA	NA	Up	42643.2	43247.6	31331.5	50007.9	45722.4	40743.7	42934.6	335320	1.4876e+06	203495	498077	3.58146e+06
8.762_406.23579	11.2602	0.0377961	0.277512	1.78969	HS:Control	NEG	8.762	406.236	C23 H34 O6	Diginatigenin	0.000250623	0.616941	NA	level4	ChemSpider	NA	NA	NA	NA	NA	NA	NA	NA	NA	Up	108448	173231	157572	77626.9	75326.2	154205	244932	974941	1.94807e+06	53778.5	1.09945e+06	4.08356e+06
8.768_178.13591	6.2391	0.0284441	0.276631	1.60509	HS:Control	POS	8.768	178.136	C12 H18 O	Propofol	0.00014044	0.788387	NA	level4	ChemSpider	NA	NA	NA	NA	NA	NA	NA	NA	NA	Up	9.12494e+06	8.72303e+06	1.32645e+07	7.72915e+06	1.63494e+07	6.2912e+06	1.04233e+07	4.8073e+07	7.04832e+07	9.59812e+06	7.32648e+07	1.71751e+08
8.768_332.17543	9.67417	0.00779615	0.276631	2.03206	HS:Control	POS	8.768	332.175	C16 H16 D6 O7	(7E)-8-[(1R,2R,5R)-2-(2-Carboxyethyl)-5-hydroxy-3-oxocyclopentyl]-6-oxo(2,2,3,3,4,4-~2~H_6_)-7-octenoic acid	0.00121875	3.66901	NA	level4	ChemSpider	NA	NA	NA	NA	NA	NA	NA	NA	NA	Up	158299	380191	335879	90386	60036.8	85423	246377	1.67154e+06	2.00063e+06	240084	2.45872e+06	4.12305e+06
8.769_286.25077	0.22064	0.0429274	0.279237	1.45961	HS:Control	POS	8.769	286.251	C17 H34 O3	methyl 3-hydroxypalmitate	-2.5065e-05	-0.0875632	NA	level4	ChemSpider	NA	NA	NA	NA	NA	NA	NA	NA	NA	Down	1.67926e+06	1.03476e+06	746025	165232	238300	105382	102184	69358	72808	385280	92092	153989
8.795_160.12529	2.57523	0.0320998	0.276631	1.21531	HS:Control	POS	8.795	160.125	C12 H16	p-Isopropyl-α-methylstyrene	8.77822e-05	0.54821	NA	level4	ChemSpider	NA	NA	NA	NA	NA	NA	NA	NA	NA	Up	6.65051e+06	6.45063e+06	1.14873e+07	5.3532e+06	9.46707e+06	7.63185e+06	8.02888e+06	2.25154e+07	2.17748e+07	6.794e+06	2.44564e+07	3.75708e+07
8.818_630.41558	17.8812	0.0316106	0.276631	2.00683	HS:Control	POS	8.818	630.416	C37 H58 O8	(3beta,5beta,14beta)-5,10,14-Trihydroxy-24-oxo-21,24-epoxy-19-norchola-20,22-dien-3-yl 14-hydroxytetradecanoate	0.00240766	3.81918	NA	level4	ChemSpider	NA	NA	NA	NA	NA	NA	NA	NA	NA	Up	53410.9	61916	101278	54118.9	64581	57521.8	53755	2.19603e+06	1.31504e+06	56616.9	1.5436e+06	1.85915e+06
8.822_276.20805	13.1741	0.0226779	0.276631	1.98312	HS:Control	POS	8.822	276.208	C18 H28 O2	(E)-parinaric acid	-0.000878932	-3.18213	NA	level4	ChemSpider	NA	NA	NA	NA	NA	NA	NA	NA	NA	Up	1.11384e+07	7.60905e+07	5.65237e+07	3.2952e+07	1.46802e+07	2.86488e+07	4.32023e+07	5.0256e+08	6.12716e+08	2.26723e+07	8.52409e+08	8.65183e+08
8.829_334.18955	6.92958	0.0365944	0.276909	1.61354	HS:Control	POS	8.829	334.19	C18 H26 N2 O4	Proglumide	0.000296944	0.88855	NA	level4	ChemSpider	NA	NA	NA	NA	NA	NA	NA	NA	NA	Up	76347.1	167641	160948	300284	214727	72299.8	177500	2.34539e+06	1.34236e+06	93164.1	1.88533e+06	1.03211e+06
8.837_288.24502	0.434996	0.0305875	0.276631	1.44893	HS:Control	POS	8.837	288.245	C20 H32 O	ethylestrenol	-0.000299623	-1.03947	NA	level4	ChemSpider	NA	NA	NA	NA	NA	NA	NA	NA	NA	Down	2.77857e+07	1.10714e+07	8.51396e+06	8.09261e+06	1.48586e+07	1.00232e+07	8.05057e+06	2.66392e+06	1.82202e+06	1.8716e+07	1.81691e+06	1.88054e+06
8.851_164.11966	0.528807	0.0301413	0.276631	1.06122	HS:Control	POS	8.851	164.12	C11 H16 O	Fenipentol	-0.000457437	-2.78721	NA	level4	ChemSpider	NA	NA	NA	NA	NA	NA	NA	NA	NA	Down	3.26314e+07	2.37168e+07	2.00968e+07	1.31132e+07	1.4023e+07	1.02388e+07	7.16084e+06	8.51412e+06	1.16589e+07	4.63623e+06	1.15404e+07	1.66784e+07
8.859_244.18258	0.317957	0.00316022	0.276631	1.60944	HS:Control	POS	8.859	244.183	C17 H24 O	Celestolide	-0.000134184	-0.549524	NA	level4	ChemSpider	NA	NA	NA	NA	NA	NA	NA	NA	NA	Down	3.17941e+06	2.641e+06	2.21146e+06	1.09207e+06	1.4521e+06	1.18368e+06	833479	424832	1.35178e+06	483848	233781	411362
8.938_382.27173	0.303464	0.0424487	0.278833	1.28164	HS:Control	POS	8.938	382.272	C22 H38 O5	Misoprostol	-0.00019623	-0.513326	NA	level4	ChemSpider	NA	NA	NA	NA	NA	NA	NA	NA	NA	Down	5.81798e+06	1.05517e+06	594243	1.13189e+06	1.82545e+06	701543	539745	374862	721459	963665	337623	439070
8.999_250.22962	7.56185	0.00843189	0.276631	1.87854	HS:Control	POS	8.999	250.23	C17 H30 O	Civetone	-4.24902e-05	-0.169805	NA	level4	ChemSpider	NA	NA	NA	NA	NA	NA	NA	NA	NA	Up	821586	1.0143e+06	584357	381178	224437	682463	919303	3.04375e+06	5.463e+06	853573	6.30667e+06	1.14555e+07
9.011_368.23261	3.86021	0.0249312	0.276631	1.46401	HS:Control	POS	9.011	368.233	C19 H32 N2 O5	Perindopril	0.00148744	4.03941	NA	level4	ChemSpider	NA	NA	NA	NA	NA	NA	NA	NA	NA	Up	2.69007e+06	4.57151e+06	2.57834e+06	2.29961e+06	2.25004e+06	2.29461e+06	2.82976e+06	2.3571e+07	1.19217e+07	2.84924e+06	9.30329e+06	1.39294e+07
9.015_346.25048	4.44456	0.0248581	0.276631	1.52961	HS:Control	POS	9.015	346.25	C22 H34 O3	Ginkgoic acid	-0.000311402	-0.899354	NA	level4	ChemSpider	NA	NA	NA	NA	NA	NA	NA	NA	NA	Up	2.69007e+06	4.57151e+06	2.57834e+06	2.29961e+06	2.25004e+06	2.29461e+06	2.82976e+06	2.73443e+07	1.19217e+07	2.84924e+06	1.14058e+07	1.7803e+07
9.027_368.25564	2.12095	0.0296209	0.276631	1.3386	HS:Control	POS	9.027	368.256	C21 H36 O5	Carboprost	-0.000631933	-1.71602	NA	level4	ChemSpider	NA	NA	NA	NA	NA	NA	NA	NA	NA	Up	958609	1.30725e+06	1.31379e+06	3.48964e+06	5.32131e+06	5.90533e+06	8.37897e+06	6.36291e+06	3.89899e+06	7.45999e+06	4.97907e+06	7.72487e+06
9.08_232.21894	6.75368	0.0424487	0.278833	1.59734	HS:Control	POS	9.08	232.219	C17 H28	6-phenylundecane	-0.000159664	-0.687558	NA	level4	ChemSpider	NA	NA	NA	NA	NA	NA	NA	NA	NA	Up	173998	104035	403451	512992	252186	319062	104766	1.70423e+06	1.68125e+06	629237	2.85687e+06	4.94879e+06
9.094_523.27048	0.459009	0.0231358	0.276631	1.20285	HS:Control	POS	9.094	523.27	C29 H37 N3 O6	Calcimycin	0.00224068	4.28208	NA	level4	ChemSpider	NA	NA	NA	NA	NA	NA	NA	NA	NA	Down	2.50143e+06	1.14815e+06	1.06194e+06	3.13823e+06	3.24684e+06	2.72144e+06	1.81722e+06	484452	1.28038e+06	1.17063e+06	555230	1.03468e+06
9.196_384.26650	0.340687	0.0138954	0.276631	1.40379	HS:Control	POS	9.196	384.267	C25 H36 O3	Estradiol enanthate	5.55738e-05	0.144623	NA	level4	ChemSpider	NA	NA	NA	NA	NA	NA	NA	NA	NA	Down	3.10467e+06	744615	1.15539e+06	3.61505e+06	3.78951e+06	2.23308e+06	1.57783e+06	607998	642900	789392	563918	806402
9.257_164.15664	0.532683	0.0180379	0.276631	1.13034	HS:Control	NEG	9.257	164.157	C12 H20	(2E,4E,6E)-5-Ethyl-3-methyl-2,4,6-nonatriene	0.000138055	0.840995	NA	level4	ChemSpider	NA	NA	NA	NA	NA	NA	NA	NA	NA	Down	1.28078e+06	1.03297e+06	1.03004e+06	1.03398e+06	481312	707408	749851	309590	428338	608373	624849	244170
9.258_272.21402	0.553079	0.0182337	0.276631	1.12362	HS:Control	NEG	9.258	272.214	C19 H28 O	ANDROSTENONE	7.13332e-06	0.0262048	NA	level4	ChemSpider	NA	NA	NA	NA	NA	NA	NA	NA	NA	Down	1.04889e+06	828209	790432	874619	498195	546988	580578	254027	417378	611145	471881	202148
9.267_525.28630	0.445107	0.0184444	0.276631	1.20648	HS:Control	POS	9.267	525.286	C27 H44 N O7 P	lysophosphatidylethanolamine (22:6(4Z,7Z,10Z,13Z,16Z,19Z)/0:0)	0.000759218	1.44534	NA	level4	ChemSpider	NA	NA	NA	NA	NA	NA	NA	NA	NA	Down	3.58596e+08	1.30554e+08	1.36907e+08	3.75895e+08	4.17746e+08	3.42736e+08	2.23771e+08	8.78627e+07	1.06056e+08	1.72484e+08	8.22651e+07	1.12032e+08
9.293_501.28615	0.515787	0.0152946	0.276631	1.17866	HS:Control	POS	9.293	501.286	C25 H44 N O7 P	1-arachidonoyl-sn-glycero-3-phosphoethanolamine	0.000608645	1.21417	NA	level4	ChemSpider	NA	NA	NA	NA	NA	NA	NA	NA	NA	Down	5.5807e+08	3.95159e+08	4.54367e+08	8.9474e+08	7.80342e+08	7.83938e+08	7.17667e+08	2.36463e+08	2.31342e+08	3.7699e+08	1.77973e+08	2.53916e+08
9.376_569.34828	0.570765	0.0409462	0.277575	1.06249	HS:Control	POS	9.376	569.348	C30 H52 N O7 P	LysoPC(22:5(7Z,10Z,13Z,16Z,19Z))	0.000140547	0.246856	NA	level4	ChemSpider	NA	NA	NA	NA	NA	NA	NA	NA	NA	Down	5.58384e+07	9.30885e+07	9.09498e+07	1.40122e+08	7.91332e+07	7.44969e+07	7.96646e+07	1.95745e+07	6.86115e+07	5.73059e+07	2.66017e+07	5.28181e+07
9.386_527.30167	0.383137	0.00342878	0.276631	1.51128	HS:Control	POS	9.386	527.302	C27 H46 N O7 P	(2R)-1-{[(2-Aminoethoxy)(hydroxy)phosphoryl]oxy}-3-hydroxy-2-propanyl (4Z,7Z,10Z,13Z,16Z)-4,7,10,13,16-docosapentaenoate	0.000484228	0.918314	NA	level4	ChemSpider	NA	NA	NA	NA	NA	NA	NA	NA	NA	Down	5.53234e+07	4.24658e+07	4.35501e+07	9.74985e+07	4.79144e+07	5.533e+07	3.87189e+07	1.1008e+07	2.29904e+07	2.83744e+07	9.99416e+06	1.99786e+07
9.398_665.39050	15.825	0.0293969	0.276631	1.95609	HS:Control	POS	9.398	665.39	C32 H60 N O11 P	1-Palmitoyl-2-(5-hydroxy-8-oxo-6-octenedioyl)-sn-glycero-3-phosphatidylcholine	0.000103445	0.155465	NA	level4	ChemSpider	NA	NA	NA	NA	NA	NA	NA	NA	NA	Up	105697	111886	94578.3	106603	120575	157435	126098	1.84124e+06	1.6774e+06	96820.6	2.21018e+06	5.07472e+06
9.401_595.34879	16.9278	0.0264937	0.276631	1.97767	HS:Control	POS	9.401	595.349	C28 H54 N O10 P	(2R)-2-[(3-Carboxypropanoyl)oxy]-3-(palmitoyloxy)propyl 2-(trimethylammonio)ethyl phosphate	0.000257078	0.431812	NA	level4	ChemSpider	NA	NA	NA	NA	NA	NA	NA	NA	NA	Up	74430.5	75927.6	67118	86684.7	99374.4	129753	103926	952300	1.29418e+06	82322.6	2.32708e+06	4.2676e+06
9.425_581.36827	3.06895	0.0228385	0.276631	1.30506	HS:Control	POS	9.425	581.368	C28 H56 N O9 P	O-{[(2R)-3-(Docosanoyloxy)-2-hydroxypropoxy](hydroxy)phosphoryl}-L-serine	-0.000995894	-1.71301	NA	level4	ChemSpider	NA	NA	NA	NA	NA	NA	NA	NA	NA	Up	140195	79654.8	104282	201430	206273	230822	191081	382412	357928	214879	406942	1.40111e+06
9.481_292.21932	2.50229	0.0152213	0.276631	1.3994	HS:Control	POS	9.481	292.219	C19 H29 F O	3beta-Fluoroandrost-5-en-17beta-ol	-0.000927282	-3.17323	NA	level4	ChemSpider	NA	NA	NA	NA	NA	NA	NA	NA	NA	Up	343404	879049	1.87759e+06	1.70374e+06	2.1806e+06	1.62612e+06	5.34914e+06	3.40521e+06	5.28188e+06	2.14001e+06	2.31736e+06	3.05238e+06
9.494_310.22938	3.15858	0.0139905	0.276631	1.4153	HS:Control	POS	9.494	310.229	C22 H30 O	Desogestrel	-0.000285538	-0.920409	NA	level4	ChemSpider	NA	NA	NA	NA	NA	NA	NA	NA	NA	Up	3.3006e+06	3.10835e+06	4.84353e+06	7.78575e+06	9.47383e+06	1.003e+07	2.60346e+07	1.23238e+07	1.56539e+07	4.96407e+07	7.90563e+06	1.01793e+07
9.495_402.27697	3.08503	0.00803128	0.276631	1.43689	HS:Control	POS	9.495	402.277	C25 H38 O4	16-O-deacetyl-16-epi-scalarolbutenolide	-4.43367e-05	-0.110214	NA	level4	ChemSpider	NA	NA	NA	NA	NA	NA	NA	NA	NA	Up	1.95212e+07	2.06667e+07	2.92642e+07	3.40835e+07	3.98361e+07	3.84109e+07	1.08496e+08	6.66824e+07	7.73167e+07	2.19063e+08	4.16773e+07	4.757e+07
9.496_424.25884	3.32384	0.0226589	0.276631	1.36323	HS:Control	POS	9.496	424.259	C20 H41 O7 P	1-heptadecanoyl-sn-glycero-3-phosphate	-0.000154748	-0.364749	NA	level4	ChemSpider	NA	NA	NA	NA	NA	NA	NA	NA	NA	Up	2.3904e+07	2.06108e+07	3.29785e+07	4.58163e+07	5.09774e+07	5.19275e+07	1.37249e+08	8.91811e+07	9.26331e+07	3.42323e+08	4.70024e+07	4.35124e+07
9.507_448.28241	3.86498	0.0158918	0.276631	1.66807	HS:Control	NEG	9.507	448.282	C26 H40 O6	16-feruloyloxypalmitic acid	-8.18839e-05	-0.182661	NA	level4	ChemSpider	NA	NA	NA	NA	NA	NA	NA	NA	NA	Up	1.01183e+06	755935	1.35025e+06	5.40654e+06	6.19683e+06	6.52665e+06	1.71794e+07	7.95194e+06	1.07954e+07	3.42562e+07	4.32156e+06	7.61881e+06
9.542_705.42113	2.2169	0.0427668	0.278946	1.0321	HS:Control	POS	9.542	705.421	C35 H64 N O11 P	(7R,18E)-1-Amino-4,17-dihydroxy-7-{[(9Z)-9-octadecenoyloxy]methyl}-9-oxo-3,5,8-trioxa-4-phosphaicos-18-en-20-oic acid 4-oxide	-0.000568888	-0.806451	NA	level4	ChemSpider	NA	NA	NA	NA	NA	NA	NA	NA	NA	Up	121613	116414	130001	209498	190038	230101	225408	187834	240892	239529	388748	929313
9.547_619.38506	12.6594	0.0387941	0.277575	1.77227	HS:Control	POS	9.547	619.385	C31 H58 N O9 P	(2R)-3-[(9Z)-9-Octadecenoyloxy]-2-[(5-oxopentanoyl)oxy]propyl 2-(trimethylammonio)ethyl phosphate	0.000144529	0.233342	NA	level4	ChemSpider	NA	NA	NA	NA	NA	NA	NA	NA	NA	Up	1.23082e+06	496831	669779	534140	395921	496047	439957	5.96429e+06	6.33124e+06	667741	5.78286e+06	2.92176e+07
9.548_391.27583	0.420861	0.00652759	0.276631	1.44949	HS:Control	NEG	9.548	391.276	C20 H41 N O4 S	N-Stearoyltaurine	0.000199945	0.511007	NA	level4	ChemSpider	NA	NA	NA	NA	NA	NA	NA	NA	NA	Down	4.10184e+06	3.74393e+06	4.50655e+06	2.41652e+06	3.09513e+06	3.50355e+06	2.55696e+06	520707	1.38105e+06	1.03074e+06	1.97829e+06	1.52501e+06
9.566_529.31701	0.485349	0.0050549	0.276631	1.3039	HS:Control	POS	9.566	529.317	C27 H48 N O7 P	(2R)-1-{[(2-Aminoethoxy)(hydroxy)phosphoryl]oxy}-3-hydroxy-2-propanyl (7Z,10Z,13Z,16Z)-7,10,13,16-docosatetraenoate	0.000175606	0.33176	NA	level4	ChemSpider	NA	NA	NA	NA	NA	NA	NA	NA	NA	Down	1.57363e+07	1.01986e+07	1.09599e+07	1.65259e+07	1.63535e+07	1.08445e+07	1.19193e+07	4.38174e+06	6.14835e+06	6.08166e+06	3.35903e+06	7.23817e+06
9.605_665.42698	6.71586	0.00861068	0.276631	1.79058	HS:Control	POS	9.605	665.427	C33 H64 N O10 P	PAz-PC	0.00019255	0.289363	NA	level4	ChemSpider	NA	NA	NA	NA	NA	NA	NA	NA	NA	Up	177361	121103	131382	273481	251067	343144	476173	786575	1.23799e+06	270881	1.57903e+06	4.36343e+06
9.634_703.43997	4.39453	0.0123423	0.276631	1.59468	HS:Control	POS	9.634	703.44	C36 H66 N O10 P	O-[{(2R)-2-[(9Z)-9-Hexadecenoyloxy]-3-[(9Z)-9-tetradecenoyloxy]propoxy}(hydroxy)phosphoryl]-L-serine	-0.00246028	-3.49749	NA	level4	ChemSpider	NA	NA	NA	NA	NA	NA	NA	NA	NA	Up	305284	180646	196750	227605	248401	275804	310925	1.00451e+06	923074	319693	1.2525e+06	2.49322e+06
9.635_505.31749	0.455884	0.0248234	0.276631	1.27446	HS:Control	POS	9.635	505.317	C25 H48 N O7 P	2-[(11Z,14Z)-icosadienoyl]-sn-glycero-3-phosphoethanolamine	0.000651397	1.28909	NA	level4	ChemSpider	NA	NA	NA	NA	NA	NA	NA	NA	NA	Down	3.35616e+07	1.08183e+07	1.44026e+07	1.45427e+07	1.95695e+07	9.89043e+06	1.81793e+07	4.05077e+06	4.76782e+06	8.20507e+06	2.79832e+06	8.85683e+06
9.639_649.43223	3.13075	0.0400252	0.277575	1.21861	HS:Control	POS	9.639	649.432	C33 H64 N O9 P	1-O-palmitoyl-2-O-(9-oxononanoyl)-sn-glycero-3-phosphocholine	0.000358846	0.552554	NA	level4	ChemSpider	NA	NA	NA	NA	NA	NA	NA	NA	NA	Up	2.3141e+06	826281	838561	1.6325e+06	1.1541e+06	1.05565e+06	1.52156e+06	3.2184e+06	3.32368e+06	1.16601e+06	3.50779e+06	1.17487e+07
9.641_184.12548	0.158199	0.00369433	0.276631	1.94396	HS:Control	POS	9.641	184.125	C14 H16	Chamazulene	0.00028244	1.53396	NA	level4	ChemSpider	NA	NA	NA	NA	NA	NA	NA	NA	NA	Down	7.13318e+06	5.37867e+06	1.95729e+06	817442	954420	2.18446e+06	623449	171733	243463	1.34472e+06	328952	202581
9.642_156.09411	0.187614	0.0035106	0.276631	1.88964	HS:Control	POS	9.642	156.094	C12 H12	2,6-DIMETHYLNAPHTHALENE	0.000211806	1.35691	NA	level4	ChemSpider	NA	NA	NA	NA	NA	NA	NA	NA	NA	Down	8.15672e+06	4.16959e+06	2.76982e+06	1.06267e+06	1.18165e+06	2.77856e+06	721783	190983	410382	1.7179e+06	486923	246628
9.642_186.14105	0.2274	0.00554944	0.276631	1.79941	HS:Control	POS	9.642	186.141	C14 H18	5-Ethyl-3,8-dimethyl-1,7-dihydroazulene	0.000202367	1.08717	NA	level4	ChemSpider	NA	NA	NA	NA	NA	NA	NA	NA	NA	Down	1.59778e+07	7.44909e+06	6.91164e+06	2.41578e+06	2.94434e+06	5.36919e+06	2.98922e+06	495336	1.04462e+06	3.58174e+06	574664	653247
9.642_198.14109	0.194144	0.00433231	0.276631	1.95047	HS:Control	POS	9.642	198.141	C15 H18	guaiazulene	0.000236475	1.19347	NA	level4	ChemSpider	NA	NA	NA	NA	NA	NA	NA	NA	NA	Down	1.56618e+07	7.53151e+06	6.07703e+06	2.23323e+06	2.58237e+06	4.65868e+06	1.79325e+06	325883	734313	3.75067e+06	543045	374863
9.642_200.15673	0.250365	0.00526106	0.276631	1.68434	HS:Control	POS	9.642	200.157	C15 H20	3,4-Dihydrocadalene	0.000228607	1.14214	NA	level4	ChemSpider	NA	NA	NA	NA	NA	NA	NA	NA	NA	Down	2.82551e+07	1.53928e+07	9.94423e+06	4.74299e+06	6.25271e+06	9.99786e+06	3.52888e+06	2.79301e+06	1.54678e+06	7.04601e+06	2.93842e+06	820576
9.642_212.15667	0.197164	0.00378992	0.276631	1.94066	HS:Control	POS	9.642	212.157	C16 H20	2,6-Di-iso-propylnaphthalene	0.000170536	0.803821	NA	level4	ChemSpider	NA	NA	NA	NA	NA	NA	NA	NA	NA	Down	2.21431e+07	1.22053e+07	9.65416e+06	3.24593e+06	4.45316e+06	7.41245e+06	2.92406e+06	603812	1.1576e+06	5.51468e+06	916627	538396
9.642_370.24849	0.223893	0.0084057	0.276631	1.83228	HS:Control	POS	9.642	370.248	C19 H34 N2 O5	N-(3-Oxodecanoyl)-L-leucyl-L-alanine	0.00171715	4.63785	NA	level4	ChemSpider	NA	NA	NA	NA	NA	NA	NA	NA	NA	Down	1.71938e+07	8.56028e+06	6.16566e+06	2.82021e+06	3.44634e+06	7.38621e+06	2.76564e+06	328603	2.11113e+06	3.43245e+06	1.16886e+06	396692
9.642_94.07834	0.305656	0.00439802	0.276631	1.50377	HS:Control	POS	9.642	94.0783	C7 H10	1,3,5-Heptatriene	8.88993e-05	0.94495	NA	level4	ChemSpider	NA	NA	NA	NA	NA	NA	NA	NA	NA	Down	6.64086e+07	2.43675e+07	2.1337e+07	1.30762e+07	1.41712e+07	2.46186e+07	1.07582e+07	5.96178e+06	7.4612e+06	1.52423e+07	5.24525e+06	5.45254e+06
9.644_172.12541	0.338052	0.0280813	0.276631	1.24591	HS:Control	POS	9.644	172.125	C13 H16	1,1,6-Trimethyl-1,2-dihydronaphthalene	0.000209752	1.2186	NA	level4	ChemSpider	NA	NA	NA	NA	NA	NA	NA	NA	NA	Down	2.07934e+07	3.39268e+06	7.73519e+06	3.37615e+06	3.45711e+06	6.28524e+06	2.08428e+06	2.38397e+06	1.35986e+06	4.23465e+06	3.08377e+06	2.07926e+06
9.644_226.17232	0.134323	0.00108903	0.276631	2.09164	HS:Control	POS	9.644	226.172	C17 H22	(8E,15Z)-1,8,15-Heptadecatriene-11,13-diyne	0.00017066	0.754558	NA	level4	ChemSpider	NA	NA	NA	NA	NA	NA	NA	NA	NA	Down	8.84226e+06	4.73758e+06	3.02948e+06	1.14147e+06	1.12555e+06	2.74485e+06	471967	244688	331181	1.34608e+06	323652	186650
9.645_284.21390	0.276385	0.0217314	0.276631	1.38744	HS:Control	POS	9.645	284.214	C20 H28 O	all-trans-retinal	-0.000118584	-0.417235	NA	level4	ChemSpider	NA	NA	NA	NA	NA	NA	NA	NA	NA	Down	4.53154e+07	2.36088e+07	2.01968e+07	5.65796e+06	5.85733e+06	1.91334e+07	6.00363e+06	5.27116e+06	4.32488e+06	8.69925e+06	6.04997e+06	2.75367e+06
9.679_211.19323	0.49476	0.0307975	0.276631	1.17012	HS:Control	POS	9.679	211.193	C13 H25 N O	UNII:6S7S02945H	-0.000381866	-1.80813	NA	level4	ChemSpider	NA	NA	NA	NA	NA	NA	NA	NA	NA	Down	1.77286e+07	1.00973e+07	1.14615e+07	2.62946e+07	2.35344e+07	2.63276e+07	2.03506e+07	7.89316e+06	7.75437e+06	1.30153e+07	3.89588e+06	4.20779e+06
9.68_194.16675	0.49061	0.0300621	0.276631	1.17681	HS:Control	POS	9.68	194.167	C13 H22 O	Geranylacetone	-0.000312655	-1.61024	NA	level4	ChemSpider	NA	NA	NA	NA	NA	NA	NA	NA	NA	Down	1.77286e+07	1.00973e+07	1.14615e+07	2.62946e+07	2.4511e+07	2.63276e+07	2.03506e+07	7.89316e+06	7.75437e+06	1.30153e+07	3.89588e+06	4.20779e+06
9.698_268.21880	0.250536	0.0154009	0.276631	1.48351	HS:Control	POS	9.698	268.219	C20 H28	235BBF3K97	-0.000302698	-1.12855	NA	level4	ChemSpider	NA	NA	NA	NA	NA	NA	NA	NA	NA	Down	2.96703e+08	1.8346e+08	1.06633e+08	3.40551e+07	4.955e+07	5.54283e+07	3.68558e+07	6.59109e+07	1.79509e+07	2.46484e+07	2.11106e+07	1.53697e+07
9.723_637.39455	18.5912	0.0249825	0.276631	1.99577	HS:Control	POS	9.723	637.395	C31 H60 N O10 P	O-{[(2R)-3-(Dodecanoyloxy)-2-(tridecanoyloxy)propoxy](hydroxy)phosphoryl}-L-serine	-0.000929334	-1.45802	NA	level4	ChemSpider	NA	NA	NA	NA	NA	NA	NA	NA	NA	Up	628195	411251	516739	829880	875762	910921	843199	6.30849e+06	1.11458e+07	688844	1.89299e+07	3.96601e+07
9.757_334.15874	0.588785	0.0387512	0.277575	1.00051	HS:Control	POS	9.757	334.159	C19 H23 F O4	9-Fluoro-16alpha-hydroxyandrost-4-ene-3,11,17-trione	0.000703585	2.10555	NA	level4	ChemSpider	NA	NA	NA	NA	NA	NA	NA	NA	NA	Down	1.59249e+07	1.7017e+07	1.92714e+07	2.806e+07	2.43829e+07	3.09548e+07	2.27949e+07	1.4442e+07	6.9327e+06	5.80904e+06	1.34411e+07	1.6426e+07
9.828_521.59022	0.363056	0.0246367	0.276631	1.3461	HS:Control	POS	9.828	521.59	C36 H75 N	TRILAURYLAMINE	0.000272113	0.521699	NA	level4	ChemSpider	NA	NA	NA	NA	NA	NA	NA	NA	NA	Down	1.05985e+07	1.49467e+06	2.84661e+06	3.48126e+06	4.39505e+06	4.36165e+06	2.38955e+06	1.04537e+06	1.26873e+06	3.23398e+06	1.47684e+06	452564
9.854_715.44023	5.178	0.0441939	0.283357	1.43896	HS:Control	POS	9.854	715.44	C37 H66 N O10 P	O-{Hydroxy[(2R)-2-[(6Z,9Z,12Z)-6,9,12-octadecatrienoyloxy]-3-(tridecanoyloxy)propoxy]phosphoryl}-L-serine	-0.00220034	-3.0755	NA	level4	ChemSpider	NA	NA	NA	NA	NA	NA	NA	NA	NA	Up	56836.2	48931.7	73202.2	61708.9	61575.8	56852.7	73397.3	158952	423597	43663.7	377846	782001
9.867_651.41124	3.74567	0.0323239	0.276631	1.32403	HS:Control	POS	9.867	651.411	C32 H62 N O10 P	O-{[(2R)-2,3-Bis(tridecanoyloxy)propoxy](hydroxy)phosphoryl}-L-serine	0.000108076	0.165911	NA	level4	ChemSpider	NA	NA	NA	NA	NA	NA	NA	NA	NA	Up	119961	79259.5	84443.8	123228	114252	117714	127290	210786	298711	182260	237375	1.33653e+06
9.887_292.24009	0.566503	0.0407441	0.277575	1.26747	HS:Control	POS	9.887	292.24	C19 H32 O2	3β-Androstanediol	-0.000143042	-0.489468	NA	level4	ChemSpider	NA	NA	NA	NA	NA	NA	NA	NA	NA	Down	2.28773e+07	1.80275e+07	2.09669e+07	2.4239e+07	1.76915e+07	1.68653e+07	3.60506e+07	4.73422e+06	9.66184e+06	8.15881e+06	4.08511e+06	5.66778e+06
9.889_321.26652	0.531725	0.0051338	0.276631	1.15672	HS:Control	POS	9.889	321.267	C20 H35 N O2	α-Linolenoyl Ethanolamide	-0.00025737	-0.80111	NA	level4	ChemSpider	NA	NA	NA	NA	NA	NA	NA	NA	NA	Down	1.21525e+07	9.12935e+06	9.51213e+06	6.21768e+06	5.84683e+06	7.56125e+06	7.55257e+06	3.67637e+06	4.43779e+06	4.05355e+06	4.46364e+06	2.62553e+06
9.892_733.47008	0.218543	0.0077809	0.276631	1.93692	HS:Control	POS	9.892	733.47	C41 H68 N O8 P	1-Myristoleoyl-2-docosahexaenoyl-sn-glycero-3-phosphoethanolamine	0.00182872	2.49325	NA	level4	ChemSpider	NA	NA	NA	NA	NA	NA	NA	NA	NA	Down	1.19036e+06	210708	331301	1.36049e+06	493531	1.17243e+06	620748	52701.5	188069	97624.6	33738.3	47126.9
9.894_731.47148	4.242	0.00975167	0.276631	1.56397	HS:Control	POS	9.894	731.471	C38 H70 N O10 P	O-[{(2R)-2,3-Bis[(9Z)-9-hexadecenoyloxy]propoxy}(hydroxy)phosphoryl]-L-serine	-0.00225046	-3.07662	NA	level4	ChemSpider	NA	NA	NA	NA	NA	NA	NA	NA	NA	Up	200442	94836.4	132829	215114	240289	326860	421792	623488	588235	279623	548906	2.67235e+06
9.896_677.46353	4.54219	0.0206668	0.276631	1.5601	HS:Control	POS	9.896	677.464	C35 H68 N O9 P	O-{Hydroxy[(2R)-2-hydroxy-3-{[(7Z,21Z)-2-methoxy-7,21-octacosadien-1-yl]oxy}propoxy]phosphoryl}-L-serine	0.00036107	0.532974	NA	level4	ChemSpider	NA	NA	NA	NA	NA	NA	NA	NA	NA	Up	461503	93151.9	536074	195700	236021	321055	414300	1.35503e+06	1.15781e+06	274656	1.28437e+06	3.88738e+06
9.896_693.45786	4.06923	0.0232545	0.276631	1.47865	HS:Control	POS	9.896	693.458	C35 H68 N O10 P	O-{Hydroxy[(2R)-2-(pentadecanoyloxy)-3-(tetradecanoyloxy)propoxy]phosphoryl}-L-serine	-0.000227589	-0.328195	NA	level4	ChemSpider	NA	NA	NA	NA	NA	NA	NA	NA	NA	Up	723977	150356	536074	209240	346512	343268	706423	1.35503e+06	1.15781e+06	293659	1.34593e+06	4.53874e+06
9.924_424.31866	3.68988	0.0187539	0.276631	1.49845	HS:Control	POS	9.924	424.319	C25 H44 O5	Isopropyl unoprostone	-0.000214537	-0.505604	NA	level4	ChemSpider	NA	NA	NA	NA	NA	NA	NA	NA	NA	Up	198978	133255	715593	266544	309575	375769	556044	1.28305e+06	1.24056e+06	265300	978170	3.05556e+06
9.929_426.24343	0.372611	0.0209976	0.276631	1.42592	HS:Control	POS	9.929	426.243	C27 H30 N4 O	Oxatomide	0.00146377	3.43414	NA	level4	ChemSpider	NA	NA	NA	NA	NA	NA	NA	NA	NA	Down	1.04134e+06	355890	528078	1.63434e+06	1.46623e+06	1.12767e+06	878562	266817	223893	651652	133222	138737
9.943_336.26608	0.44762	0.0390221	0.277575	1.19795	HS:Control	POS	9.943	336.266	C21 H36 O3	Pregnanetriol	-0.000361153	-1.07401	NA	level4	ChemSpider	NA	NA	NA	NA	NA	NA	NA	NA	NA	Down	8.61439e+07	3.90422e+07	3.8316e+07	2.23423e+07	2.76691e+07	1.80717e+07	3.31048e+07	1.55952e+07	7.3766e+06	3.16797e+07	7.46467e+06	8.44122e+06
9.955_422.35492	0.361896	0.0310224	0.276631	1.6101	HS:Control	POS	9.955	422.355	C30 H46 O	(3beta,5alpha,24S)-4-Methylenestigmasta-7,9(11),14-trien-3-ol	5.27847e-05	0.124977	NA	level4	ChemSpider	NA	NA	NA	NA	NA	NA	NA	NA	NA	Down	2.66463e+06	935163	542915	2.24863e+06	2.59113e+06	1.36466e+06	1.27746e+06	280406	171971	1.75932e+06	91502.8	163924
9.97_460.35411	0.334836	0.0262543	0.276631	1.33602	HS:Control	POS	9.97	460.354	C29 H48 O4	Lexacalcitol	-0.00114731	-2.49223	NA	level4	ChemSpider	NA	NA	NA	NA	NA	NA	NA	NA	NA	Down	1.9074e+06	219269	478150	454867	488704	426175	462302	135822	172091	331692	78581.9	150338
9.972_448.35552	0.154065	0.00244329	0.276631	2.02878	HS:Control	POS	9.972	448.356	C28 H48 O4	Typhasterol	0.000256499	0.572088	NA	level4	ChemSpider	NA	NA	NA	NA	NA	NA	NA	NA	NA	Down	6.70714e+06	1.73221e+06	1.93368e+06	1.08654e+06	1.30615e+06	581000	1.04487e+06	227449	106642	250198	290218	136885
9.987_406.30812	14.0797	0.0179745	0.276631	2.02091	HS:Control	POS	9.987	406.308	C25 H42 O4	(5R)-5-[(3R,5S,7S,8R,9S,10S,13R,14S,17R)-3,7-Dihydroxy-10,13-dimethylhexadecahydro-1H-cyclopenta[a]phenanthren-17-yl]hexanoic acid	-0.000192473	-0.473712	NA	level4	ChemSpider	NA	NA	NA	NA	NA	NA	NA	NA	NA	Up	218635	167741	349358	282754	281077	235891	287443	4.17844e+06	3.966e+06	344954	2.96741e+06	9.87451e+06

## Sheet: DMs (LL200+HS vs. L200)
Differential metabolites (DMs) creened from LL200+HS vs. L200 (screening criteria: VIP ≥ 1, FC ≥ 1.2 or ≤ 0.83 and p < 0.05)
Metabolite ID	Fold Change	pvalue	qvalue	VIP	Sample	Ion Mode	RT	Molecular Weight	Formula	Name	Delta Mass Da	Delta Mass ppm	Match	Level	Database	KEGG ID	HMDB ID	Super Class	Sub Class	Class	Final Class	Super Pathway	Sub Pathway	Pathway	State	L200-2	L200-3	L200-4	L200-1	L200-5	L200-6	LL200+HS-1	LL200+HS-2	LL200+HS-3	LL200+HS-4	LL200+HS-5	LL200+HS-6
0.625_232.02203	0.229747	0.0384383	0.166515	1.32898	LL200+HS:L200	NEG	0.625	232.022	C4 H4 O4	Fumarate	NA	116.011	1e+06	level1	BMDB	C00122	HMDB0000134	Organic acids and derivatives	Dicarboxylic acids and derivatives	Carboxylic acids and derivatives	Organic acids	Carbohydrate metabolism	Citrate cycle (TCA cycle)	map00020 Citrate cycle (TCA cycle); map00190 Oxidative phosphorylation; map00220 Arginine biosynthesis; map00250 Alanine, aspartate and glutamate metabolism; map00350 Tyrosine metabolism; map00360 Phenylalanine metabolism; map00620 Pyruvate metabolism; map00643 Styrene degradation; map00650 Butanoate metabolism; map00720 Carbon fixation pathways in prokaryotes; map00760 Nicotinate and nicotinamid…	Down	847077	615561	332482	87028.5	79374.1	230478	88703.7	96506.2	80144.2	72853.8	87181.7	78217.1
0.682_131.06950	3.96482	0.0129724	0.125881	1.68797	LL200+HS:L200	POS	0.682	131.07	C4 H6 N2 O2	5,6-dihydrouracil	NA	17.0266	149300	level1	BMDB	C00429	HMDB0000076	Organoheterocyclic compounds	Pyrimidines and pyrimidine derivatives	Diazines	Organoheterocyclic compounds	Nucleotide metabolism	Pyrimidine metabolism	map00240 Pyrimidine metabolism; map00410 beta-Alanine metabolism; map00770 Pantothenate and CoA biosynthesis; map01100 Metabolic pathways	Up	2.37256e+08	3.07626e+07	2.00682e+08	7.06126e+08	3.35003e+08	6.46917e+08	2.24174e+09	1.32125e+09	1.30657e+09	1.40466e+09	1.35505e+09	9.21853e+08
3.335_408.18001	0.249387	0.0181979	0.136225	1.35182	LL200+HS:L200	POS	3.335	408.18	C11 H12 N2 O2	L-Tryptophan	NA	204.09	1e+06	level1	BMDB	C00078	HMDB0000929	Organoheterocyclic compounds	Indolyl carboxylic acids and derivatives	Indoles and derivatives	Amino acids	Amino acid metabolism	Glycine, serine and threonine metabolism	map00260 Glycine, serine and threonine metabolism; map00380 Tryptophan metabolism; map00400 Phenylalanine, tyrosine and tryptophan biosynthesis; map00404 Staurosporine biosynthesis; map00901 Indole alkaloid biosynthesis; map00966 Glucosinolate biosynthesis; map00970 Aminoacyl-tRNA biosynthesis; map00998 Biosynthesis of various secondary metabolites - part 2; map01060 Biosynthesis of plant seconda…	Down	2.13351e+07	4.59134e+07	4.32504e+07	7.84947e+06	8.28601e+06	9.58073e+06	4.1508e+06	6.28807e+06	6.0075e+06	6.81634e+06	6.412e+06	4.29551e+06
8.735_301.29794	2.41562	0.00270076	0.0732429	1.33118	LL200+HS:L200	POS	8.735	301.298	C18 H36 O2	Stearate	NA	17.0264	59894.9	level1	BMDB	C01530	HMDB0000827	Lipids and lipid-like molecules	Fatty acids and conjugates	Fatty Acyls	Fatty acyls[FA]	Lipid metabolism	Fatty acid biosynthesis	map00061 Fatty acid biosynthesis; map01040 Biosynthesis of unsaturated fatty acids; map01060 Biosynthesis of plant secondary metabolites; map04745 Phototransduction - fly	Up	1.39063e+06	1.07083e+06	1.17277e+06	2.09251e+06	2.91834e+06	3.19998e+06	4.83405e+06	3.144e+06	5.28155e+06	4.23207e+06	5.64435e+06	5.47708e+06
3.108_170.10571	0.178827	0.0120946	0.124379	1.58011	LL200+HS:L200	POS	3.108	170.106	C8 H11 N O2	Octopamine	NA	17.0267	111228	level2	BMDB	C04227	HMDB0004825	Benzenoids	1-hydroxy-2-unsubstituted benzenoids	Phenols	Phenols and derivatives	NA	NA	map04080 Neuroactive ligand-receptor interaction	Down	7.40568e+06	1.76092e+07	1.17268e+07	1.37329e+06	2.12556e+06	4.2232e+06	449729	1.44286e+06	974370	1.22611e+06	2.92506e+06	933198
3.802_392.21590	0.183882	0.000771776	0.0356666	1.87129	LL200+HS:L200	POS	3.802	392.216	C20 H34 O6	Thromboxane B2	NA	21.9804	59368.6	level2	mzCloud	C05963	HMDB0003252	Lipids and lipid-like molecules	Eicosanoids	Fatty Acyls	Fatty acyls[FA]	Lipid metabolism	Arachidonic acid metabolism	map00590 Arachidonic acid metabolism; map01100 Metabolic pathways; map04726 Serotonergic synapse; map04976 Bile secretion	Down	5.40416e+06	7.74229e+06	8.86015e+06	2.15941e+06	3.30871e+06	3.39798e+06	938591	311085	726279	405139	1.73929e+06	1.55654e+06
4.352_406.23152	0.0387144	0.00223131	0.0674569	2.35861	LL200+HS:L200	POS	4.352	406.232	C9 H17 N O4	O-ACETYLCARNITINE	NA	203.116	1e+06	level2	BMDB	C02571	HMDB0000201	Lipids and lipid-like molecules	Fatty acid esters	Fatty Acyls	Fatty acyls[FA]	NA	NA	map04931 Insulin resistance	Down	4.90009e+06	8.5961e+06	7.75067e+06	398707	629486	830258	85276.2	90803.9	97102.4	54643.7	446102	120579
4.56_226.07417	0.147007	0.0127101	0.125383	1.66458	LL200+HS:L200	POS	4.56	226.074	C11 H12 N2 O2	DL-Tryptophan	NA	21.9843	107719	level2	mzCloud	C00806	HMDB0030396	Organoheterocyclic compounds	Indolyl carboxylic acids and derivatives	Indoles and derivatives	Indole and derivatives	NA	NA	NA	Down	2.22967e+06	2.05656e+06	1.52892e+06	352553	176677	432456	111563	203340	86639.4	136319	274521	183856
6.373_392.22016	0.138112	0.0297159	0.156593	1.49845	LL200+HS:L200	NEG	6.373	392.22	C21 H30 O4	Corticosterone	NA	46.0057	132882	level2	mzCloud	C02140	HMDB0001547	Lipids and lipid-like molecules	Hydroxysteroids	Steroids and steroid derivatives	Steroids and derivatives	Lipid metabolism	Steroid hormone biosynthesis	map00140 Steroid hormone biosynthesis; map01100 Metabolic pathways; map04923 Regulation of lipolysis in adipocytes; map04925 Aldosterone synthesis and secretion; map05020 Prion diseases	Down	3.67777e+06	340177	246845	361998	147613	326157	125299	209081	79682	143674	61841.8	84869.2
7.725_271.25163	1.84039	0.0315802	0.158883	1.07062	LL200+HS:L200	POS	7.725	271.252	C16 H30 O2	Palmitoleic acid	NA	17.027	66976.4	level2	BMDB	C08362	HMDB0003229	Lipids and lipid-like molecules	Fatty acids and conjugates	Fatty Acyls	Fatty acyls[FA]	Lipid metabolism	Fatty acid biosynthesis	map00061 Fatty acid biosynthesis	Up	1.75171e+07	1.40828e+07	1.09438e+07	4.29338e+07	4.87458e+07	3.58558e+07	5.24349e+07	4.35051e+07	4.64107e+07	4.92881e+07	6.46968e+07	5.66759e+07
7.765_376.22312	0.188059	0.0362537	0.164963	1.40435	LL200+HS:L200	POS	7.765	376.223	C20 H34 O5	5-trans prostaglandin F2β	NA	21.9825	62055.3	level2	mzCloud	NA	NA	NA	NA	NA	NA	NA	NA	NA	Down	1.5055e+07	5.58309e+06	5.17981e+06	840799	1.22427e+06	2.02575e+06	1.28069e+06	1.40657e+06	796063	703488	660378	777392
8.339_353.25663	0.14524	0.0433316	0.174429	1.41344	LL200+HS:L200	POS	8.339	353.257	C20 H32 O4	15-epi Prostaglandin A1	NA	17.0266	50639.6	level2	mzCloud	NA	NA	NA	NA	NA	NA	NA	NA	NA	Down	9.92207e+06	1.8361e+06	828556	531638	479840	467676	563973	344720	607893	138601	165468	222278
8.994_428.26519	0.0658586	0.0417158	0.172093	1.66154	LL200+HS:L200	POS	8.994	428.265	C10 H18 N2 O3	Dethiobiotin	NA	214.133	1.00001e+06	level2	BMDB	C01909	HMDB0003581	Lipids and lipid-like molecules	Fatty acids and conjugates	Fatty Acyls	Fatty acyls[FA]	Metabolism of cofactors and vitamins	Biotin metabolism	map00780 Biotin metabolism; map01100 Metabolic pathways	Down	1.60731e+06	2.31055e+06	3.33144e+06	93260.1	85114.9	222048	89280.2	76799.7	80860.3	109555	73092.9	74211.9
9.096_433.26520	0.273843	0.00486668	0.097194	1.44813	LL200+HS:L200	NEG	9.096	433.265	C22 H39 N O5	Prostaglandin E1 Ethanolamide	NA	35.9824	90571.2	level2	mzCloud	NA	NA	NA	NA	NA	NA	NA	NA	NA	Down	4.59745e+06	6.48197e+06	9.22831e+06	2.47116e+06	1.78729e+06	2.39998e+06	477893	1.93708e+06	1.12426e+06	1.10824e+06	1.61559e+06	1.12145e+06
9.237_349.26166	0.186893	0.0178412	0.135455	1.49713	LL200+HS:L200	POS	9.237	349.262	C21 H32 O3	(+/-)17(18)-EpETE methyl ester	NA	17.0265	51248.4	level2	mzCloud	NA	NA	NA	NA	NA	NA	NA	NA	NA	Down	7.17234e+06	7.78446e+06	1.29e+07	1.72884e+06	1.49834e+06	1.70723e+06	705995	1.03333e+06	1.11944e+06	1.08843e+06	1.06974e+06	1.11149e+06
9.374_433.26530	0.172354	0.00985798	0.116818	1.57889	LL200+HS:L200	POS	9.374	433.265	C25 H33 F O4	AL 8810 Methyl ester	NA	17.029	40911.9	level2	mzCloud	NA	NA	NA	NA	NA	NA	NA	NA	NA	Down	4.19987e+06	7.75609e+06	1.01363e+07	1.59155e+06	1.09361e+06	1.39979e+06	225651	1.13097e+06	616714	801285	1.01534e+06	721780
9.42_369.28821	0.330117	7.70766e-05	0.0069073	1.5513	LL200+HS:L200	NEG	9.42	369.288	C20 H37 N O2	Linoleoyl ethanolamide	NA	46.0058	142308	level2	mzCloud	NA	NA	NA	NA	NA	NA	NA	NA	NA	Down	8.60486e+06	5.87601e+06	1.42007e+07	9.05067e+06	9.88937e+06	7.38987e+06	3.42836e+06	2.59633e+06	2.10064e+06	2.73229e+06	4.91693e+06	2.38566e+06
9.67_353.29208	0.103743	0.0413568	0.171457	1.49746	LL200+HS:L200	POS	9.67	353.292	C22 H37 N O2	Anandamide (AEA)	NA	6.00966	17304.8	level2	mzCloud	C11695	HMDB0004080	Organic nitrogen compounds	Amines	Organonitrogen compounds	Amines	NA	NA	map04080 Neuroactive ligand-receptor interaction; map04361 Axon regeneration; map04714 Thermogenesis; map04723 Retrograde endocannabinoid signaling; map04750 Inflammatory mediator regulation of TRP channels	Down	1.04174e+08	7.78037e+07	3.83348e+08	1.60354e+07	1.55638e+07	1.33833e+07	7.13048e+06	9.77736e+06	1.19296e+07	1.30432e+07	8.8586e+06	1.25763e+07
9.804_381.32416	0.0946368	0.0351887	0.164322	1.58748	LL200+HS:L200	POS	9.804	381.324	C23 H40 O3	2-Arachidonyl glycerol ether	NA	17.0264	46737.6	level2	mzCloud	NA	NA	NA	NA	NA	NA	NA	NA	NA	Down	2.08054e+07	2.32685e+07	5.2148e+07	2.11431e+06	2.38732e+06	2.55229e+06	1.03847e+06	2.13237e+06	2.01199e+06	1.43222e+06	1.55832e+06	1.60031e+06
0.561_111.07970	2.14744	0.0249299	0.150095	1.13709	LL200+HS:L200	POS	0.561	111.08	C5 H9 N3	Histamine	NA	5.07969e-05	0.457302	level3	BMDB	C00388	HMDB0000870	Organic nitrogen compounds	Amines	Organonitrogen compounds	Amines	Amino acid metabolism	Histidine metabolism	map00340 Histidine metabolism; map01065 Biosynthesis of alkaloids derived from histidine and purine; map01100 Metabolic pathways; map01110 Biosynthesis of secondary metabolites; map04080 Neuroactive ligand-receptor interaction; map04664 Fc epsilon RI signaling pathway; map04721 Synaptic vesicle cycle; map04750 Inflammatory mediator regulation of TRP channels; map04971 Gastric acid secretion; map0…	Up	2.15578e+06	4.42908e+06	5.02751e+06	5.81771e+06	1.17369e+07	9.41304e+06	1.71653e+07	8.01143e+06	1.6421e+07	2.01511e+07	1.46503e+07	6.44942e+06
0.568_206.04262	2.33982	0.00370363	0.0833587	1.31024	LL200+HS:L200	NEG	0.568	206.043	C8 H14 O2 S2	Lipoic acid	NA	-0.000898507	-4.36076	level3	mzCloud	C16241	HMDB0001451	Organoheterocyclic compounds	Lipoic acids and derivatives	Dithiolanes	Organoheterocyclic compounds	Metabolism of cofactors and vitamins	Lipoic acid metabolism	map00785 Lipoic acid metabolism; map01100 Metabolic pathways	Up	382876	631725	580328	979927	1.32448e+06	1.17326e+06	1.58432e+06	1.52218e+06	2.04292e+06	2.76658e+06	2.46863e+06	1.48433e+06
0.571_305.19539	0.100541	0.0143878	0.128229	1.79093	LL200+HS:L200	POS	0.571	305.195	C18 H27 N O3	Capsaicin	NA	-0.00370313	-12.1335	level3	mzCloud	C06866	HMDB0002227	Benzenoids	Methoxyphenols	Phenols	Phenols and derivatives	Biosynthesis of other secondary metabolites	Biosynthesis of various secondary metabolites - part 2	map00998 Biosynthesis of various secondary metabolites - part 2; map01060 Biosynthesis of plant secondary metabolites; map01063 Biosynthesis of alkaloids derived from shikimate pathway; map01100 Metabolic pathways; map01110 Biosynthesis of secondary metabolites; map04750 Inflammatory mediator regulation of TRP channels	Down	4.50955e+06	1.9782e+06	4.99226e+06	281231	319025	680330	409181	156205	190767	54055.1	250699	222057
0.595_185.99285	4.34593	0.0300322	0.156593	2.21216	LL200+HS:L200	NEG	0.595	185.993	C3 H7 O7 P	3-Phosphoglyceric acid	NA	-8.54504e-05	-0.459428	level3	mzCloud	C00597	HMDB0000807	Organic oxygen compounds	Carbohydrates and carbohydrate conjugates	Organooxygen compounds	Carbohydrates	NA	NA	NA	Up	71503.2	145138	108089	1.79323e+07	8.04818e+06	5.67784e+06	4.80622e+07	2.52238e+07	1.84673e+07	1.77056e+07	1.06059e+07	1.8931e+07
0.639_132.05353	0.331027	0.00166498	0.0574276	1.41792	LL200+HS:L200	NEG	0.639	132.054	C4 H8 N2 O3	L-Asparagine	NA	3.89667e-05	0.295082	level3	BMDB	C00152	HMDB0000168	Organic acids and derivatives	Amino acids, peptides, and analogues	Carboxylic acids and derivatives	Amino acids	Amino acid metabolism	Alanine, aspartate and glutamate metabolism	map00250 Alanine, aspartate and glutamate metabolism; map00460 Cyanoamino acid metabolism; map00970 Aminoacyl-tRNA biosynthesis; map01060 Biosynthesis of plant secondary metabolites; map01100 Metabolic pathways; map01110 Biosynthesis of secondary metabolites; map01230 Biosynthesis of amino acids; map04974 Protein digestion and absorption; map04978 Mineral absorption; map05230 Central carbon metab…	Down	7.02175e+07	1.222e+08	4.96425e+07	3.16591e+07	3.92771e+07	6.14877e+07	2.67016e+07	1.41229e+07	1.80145e+07	1.87561e+07	2.9857e+07	1.6512e+07
0.653_145.11025	2.43659	0.0321554	0.159765	1.29369	LL200+HS:L200	POS	0.653	145.11	C7 H15 N O2	Acetylcholine	NA	-3.14814e-05	-0.216948	level3	mzCloud	C01996	HMDB0000895	Organic nitrogen compounds	Quaternary ammonium salts	Organonitrogen compounds	Organic nitrogen compounds	Lipid metabolism	Glycerophospholipid metabolism	map00564 Glycerophospholipid metabolism; map04024 cAMP signaling pathway; map04080 Neuroactive ligand-receptor interaction; map04721 Synaptic vesicle cycle; map04725 Cholinergic synapse; map04742 Taste transduction; map04810 Regulation of actin cytoskeleton; map04911 Insulin secretion; map04970 Salivary secretion; map04971 Gastric acid secretion; map04972 Pancreatic secretion; map04976 Bile secre…	Up	9.51953e+06	2.57149e+06	1.68754e+07	2.42443e+07	3.25249e+07	2.78086e+07	5.64374e+07	3.96973e+07	6.32076e+07	3.12324e+07	3.91351e+07	4.69515e+07
0.655_161.10510	1.7812	0.0365846	0.164963	1.03508	LL200+HS:L200	POS	0.655	161.105	C7 H15 N O3	DL-Carnitine	NA	-9.47623e-05	-0.588201	level3	mzCloud	NA	NA	NA	NA	NA	NA	NA	NA	NA	Up	2.87359e+08	4.21521e+08	3.74165e+08	1.25413e+09	9.27459e+08	9.3844e+08	1.84918e+09	1.27639e+09	1.22736e+09	1.13011e+09	8.53346e+08	1.15011e+09
0.667_117.07894	2.95366	0.013435	0.127337	1.60573	LL200+HS:L200	POS	0.667	117.079	C5 H11 N O2	Betaine	NA	-3.93331e-05	-0.335954	level3	mzCloud	C00719	HMDB0000043	Organic acids and derivatives	Amino acids, peptides, and analogues	Carboxylic acids and derivatives	Amino acids, peptides, and analogues	Amino acid metabolism	Glycine, serine and threonine metabolism	map00260 Glycine, serine and threonine metabolism; map01100 Metabolic pathways; map02010 ABC transporters	Up	6.88642e+08	2.00061e+09	1.52454e+09	7.05447e+09	7.45808e+09	3.01899e+09	1.19118e+10	9.45877e+09	1.10281e+10	1.06112e+10	8.76502e+09	1.24534e+10
0.676_226.10646	0.0848902	0.0243229	0.149934	1.71587	LL200+HS:L200	NEG	0.676	226.106	C9 H14 N4 O3	Carnosine	NA	-0.000130218	-0.575913	level3	BMDB	C00386	HMDB0000033	Organic acids and derivatives	Hybrid peptides	Peptidomimetics	Organic acids	Amino acid metabolism	Histidine metabolism	map00340 Histidine metabolism; map00410 beta-Alanine metabolism; map01100 Metabolic pathways	Down	2.83369e+06	5.46777e+06	3.04511e+06	214816	283519	489964	186814	178141	172280	182750	182086	145038
0.681_174.06392	0.464731	0.00609827	0.104113	1.18362	LL200+HS:L200	POS	0.681	174.064	C6 H10 N2 O4	N-alpha-acetyl-l-asparagine	NA	-0.000139779	-0.803031	level3	BMDB	NA	HMDB0006028	Organic acids and derivatives	Amino acids, peptides, and analogues	Carboxylic acids and derivatives	Amino acids, peptides, and analogues	NA	NA	NA	Down	4.78374e+08	6.35349e+08	6.1771e+08	3.82174e+08	4.24986e+08	3.14591e+08	2.24338e+08	3.34586e+08	3.60282e+08	1.37989e+08	1.15263e+08	1.53505e+08
0.684_131.06946	3.83423	0.000730865	0.0346023	1.72749	LL200+HS:L200	NEG	0.684	131.069	C4 H9 N3 O2	Creatine	NA	-1.2818e-05	-0.0977957	level3	BMDB	C00300	HMDB0000064	Organic acids and derivatives	Amino acids, peptides, and analogues	Carboxylic acids and derivatives	Amino acids, peptides, and analogues	Amino acid metabolism	Glycine, serine and threonine metabolism	map00260 Glycine, serine and threonine metabolism; map00330 Arginine and proline metabolism; map01100 Metabolic pathways	Up	1.83065e+06	3.46071e+06	1.52559e+06	6.05921e+06	3.06531e+06	5.64661e+06	2.1527e+07	1.23123e+07	1.34268e+07	1.40008e+07	1.20508e+07	9.45604e+06
0.688_202.09532	0.243003	0.0253713	0.150214	1.41103	LL200+HS:L200	POS	0.688	202.095	C8 H16 N2 O5	2-Acetamido-2-deoxy-beta-D-glucosylamine	NA	-18.0106	-81827	level3	BMDB	NA	NA	NA	NA	NA	NA	NA	NA	NA	Down	6.04857e+06	7.98846e+06	8.7186e+06	620851	3.09164e+06	3.21114e+06	825814	1.31279e+06	1.01905e+06	691385	2.69946e+06	663638
0.691_172.08469	0.489685	0.00313025	0.0769288	1.1715	LL200+HS:L200	POS	0.691	172.085	C7 H12 N2 O3	Prolylglycine	NA	-0.000106731	-0.620221	level3	mzCloud	NA	NA	NA	NA	NA	NA	NA	NA	NA	Down	1.63365e+07	2.01288e+07	2.63364e+07	1.75253e+07	1.36927e+07	1.4067e+07	5.01252e+06	7.48941e+06	1.05032e+07	6.26004e+06	1.44019e+07	9.26128e+06
0.697_156.05348	0.24669	0.0070477	0.107668	1.43712	LL200+HS:L200	POS	0.697	156.053	C6 H6 N2 O2	Urocanate	NA	18.0106	130471	level3	BMDB	C00785	HMDB0000301	Organoheterocyclic compounds	Imidazoles	Azoles	Imidazoles	Amino acid metabolism	Histidine metabolism	map00340 Histidine metabolism; map01100 Metabolic pathways	Down	5.5255e+07	1.59807e+08	1.20001e+08	2.74811e+07	3.2958e+07	3.6266e+07	1.76592e+07	2.82214e+07	2.35717e+07	1.27206e+07	1.38074e+07	1.05327e+07
0.698_143.09472	4.54101	0.0322319	0.159765	1.69342	LL200+HS:L200	POS	0.698	143.095	C7 H13 N O2	DL-Stachydrine	NA	9.06762e-05	0.63368	level3	mzCloud	NA	NA	NA	NA	NA	NA	NA	NA	NA	Up	1.01568e+07	947904	3.82641e+07	6.93545e+07	8.58609e+07	3.36974e+07	2.48161e+08	6.65212e+07	7.52757e+07	1.54656e+08	1.7121e+08	3.66216e+08
0.709_136.03858	5.55735	0.0345598	0.163857	1.87141	LL200+HS:L200	NEG	0.709	136.039	C4 H8 O5	L-Threonic acid	NA	0.00140975	10.3629	level3	mzCloud	C01620	HMDB0000943	Organic oxygen compounds	Carbohydrates and carbohydrate conjugates	Organooxygen compounds	Carbohydrates	Carbohydrate metabolism	Ascorbate and aldarate metabolism	map00053 Ascorbate and aldarate metabolism; map01100 Metabolic pathways	Up	128937	9.27588e+06	177373	2.49184e+06	9.32807e+06	1.41261e+06	3.47135e+07	1.94998e+06	1.64848e+07	4.78084e+06	3.38262e+07	3.50339e+07
0.719_245.17382	0.20107	0.0269064	0.153445	1.35283	LL200+HS:L200	POS	0.719	245.174	C11 H20 N2 O3	Leucylproline	NA	17.0264	74629.1	level3	mzCloud	NA	NA	NA	NA	NA	NA	NA	NA	NA	Down	4.96617e+06	2.45907e+07	1.2323e+07	1.73599e+06	2.88718e+06	2.97699e+06	2.39193e+06	735450	1.67576e+06	2.14049e+06	2.16706e+06	838240
0.926_122.04777	1.68583	0.0265257	0.152383	1.01153	LL200+HS:L200	POS	0.926	122.048	C6 H6 N2 O	Nicotinamide	NA	-0.000247575	-2.0285	level3	mzCloud	C00153	HMDB0001406	Organoheterocyclic compounds	Pyridinecarboxylic acids and derivatives	Pyridines and derivatives	Pyridine and derivatives	Metabolism of cofactors and vitamins	Nicotinate and nicotinamide metabolism	map00760 Nicotinate and nicotinamide metabolism; map01100 Metabolic pathways; map04212 Longevity regulating pathway - worm; map04977 Vitamin digestion and absorption	Up	2.06267e+09	3.0547e+09	3.5183e+09	6.69758e+09	6.42365e+09	6.02484e+09	6.65228e+09	8.58876e+09	8.08652e+09	8.38213e+09	7.1698e+09	7.95569e+09
1.061_136.03853	9.58591	0.0116302	0.122764	2.25133	LL200+HS:L200	POS	1.061	136.039	C5 H4 N4 O	Hypoxanthine	NA	2.33687e-05	0.17178	level3	mzCloud	C00262	HMDB0000157	Organoheterocyclic compounds	Purines and purine derivatives	Imidazopyrimidines	Purines and derivatives	Nucleotide metabolism	Purine metabolism	map00230 Purine metabolism; map01100 Metabolic pathways	Up	474987	5.31221e+06	938247	2.52492e+07	7.01604e+07	1.4768e+07	3.48292e+08	1.91925e+07	1.55909e+08	4.73707e+07	2.70961e+08	2.78897e+08
1.159_152.03327	3.38191	0.0334837	0.161575	1.52905	LL200+HS:L200	NEG	1.159	152.033	C5 H4 N4 O2	Xanthine	NA	-0.000151883	-0.999012	level3	mzCloud	C00385	HMDB0000292	Organoheterocyclic compounds	Purines and purine derivatives	Imidazopyrimidines	Purines and derivatives	Nucleotide metabolism	Purine metabolism	map00230 Purine metabolism; map00232 Caffeine metabolism; map01060 Biosynthesis of plant secondary metabolites; map01065 Biosynthesis of alkaloids derived from histidine and purine; map01100 Metabolic pathways; map01110 Biosynthesis of secondary metabolites; map01120 Microbial metabolism in diverse environments	Up	6.00339e+06	1.22504e+08	3.36856e+07	7.27331e+07	1.87689e+08	4.78087e+07	4.10784e+08	6.09755e+07	3.06872e+08	1.2989e+08	3.63847e+08	3.18564e+08
1.186_131.09441	0.454157	0.0233644	0.147212	1.04019	LL200+HS:L200	NEG	1.186	131.094	C6 H13 N O2	DL-β-Leucine	NA	-0.000220075	-1.67875	level3	mzCloud	C02486	NA	NA	NA	NA	NA	NA	NA	NA	Down	2.45134e+09	3.62743e+09	3.96815e+09	1.41043e+09	1.15131e+09	1.48414e+09	1.079e+09	1.08361e+09	9.84222e+08	1.17014e+09	1.19771e+09	8.85663e+08
1.6_188.11604	0.155131	0.00457661	0.0949899	1.75004	LL200+HS:L200	NEG	1.6	188.116	C8 H16 N2 O3	Glycyl-L-leucine	NA	-5.66321e-05	-0.301049	level3	mzCloud	C02155	HMDB0000759	Organic acids and derivatives	Amino acids, peptides, and analogues	Carboxylic acids and derivatives	Amino acids, peptides, and analogues	NA	NA	NA	Down	2.10387e+07	2.84436e+07	3.86137e+07	5.14489e+06	6.00454e+06	1.08247e+07	2.36495e+06	3.76726e+06	2.99402e+06	3.02733e+06	2.51183e+06	2.40993e+06
1.828_347.06314	3.11818	0.0460257	0.178119	2.06659	LL200+HS:L200	POS	1.828	347.063	C10 H14 N5 O7 P	Deoxyguanosine monophosphate	NA	5.2489e-05	0.151238	level3	BMDB	C00362	HMDB0001044	Nucleosides, nucleotides, and analogues	Purine deoxyribonucleotides	Purine nucleotides	Purines and derivatives	Nucleotide metabolism	Purine metabolism	map00230 Purine metabolism; map01100 Metabolic pathways	Up	537376	1.96627e+06	823385	1.2197e+08	1.07203e+08	8.71727e+07	1.79694e+08	1.68304e+08	1.81979e+08	1.52054e+08	1.58364e+08	1.56403e+08
1.845_153.04266	2.35803	0.0129914	0.125881	1.24241	LL200+HS:L200	POS	1.845	153.043	C7 H7 N O3	3-hydroxyanthranilate	NA	6.46868e-05	0.422672	level3	BMDB	C00632	HMDB0001476	Benzenoids	Benzoic acids and derivatives	Benzene and substituted derivatives	Benzene and derivatives	Amino acid metabolism	Tryptophan metabolism	map00380 Tryptophan metabolism; map00627 Aminobenzoate degradation; map01100 Metabolic pathways; map01120 Microbial metabolism in diverse environments	Up	9.10198e+06	2.74575e+07	1.86584e+07	1.95687e+07	4.65556e+07	4.10379e+07	1.25375e+08	4.41189e+07	5.56106e+07	3.97268e+07	5.51071e+07	6.29583e+07
1.867_159.08951	0.148199	0.0355472	0.164578	1.45858	LL200+HS:L200	NEG	1.867	159.09	C7 H13 N O3	N-Isovalerylglycine	NA	-2.98164e-05	-0.187419	level3	mzCloud	NA	HMDB0000678	Organic acids and derivatives	Amino acids, peptides, and analogues	Carboxylic acids and derivatives	Amino acids, peptides, and analogues	NA	NA	NA	Down	2.10492e+07	2.84939e+07	1.45604e+07	2.24848e+06	2.15128e+06	2.55696e+06	1.91311e+06	2.52022e+06	2.19305e+06	1.16157e+06	1.49167e+06	1.25142e+06
1.901_267.09680	2.51643	0.0238008	0.148367	1.41085	LL200+HS:L200	POS	1.901	267.097	C10 H13 N5 O4	Adenosine	NA	4.21823e-05	0.157929	level3	BMDB	C00212	HMDB0000050	Nucleosides, nucleotides, and analogues	NA	Purine nucleosides	Purines and derivatives	Nucleotide metabolism	Purine metabolism	map00230 Purine metabolism; map01100 Metabolic pathways; map02010 ABC transporters; map04022 cGMP-PKG signaling pathway; map04024 cAMP signaling pathway; map04071 Sphingolipid signaling pathway; map04080 Neuroactive ligand-receptor interaction; map04270 Vascular smooth muscle contraction; map04923 Regulation of lipolysis in adipocytes; map04924 Renin secretion; map05012 Parkinson disease; map0503…	Up	1.51315e+06	4.40896e+06	5.53608e+06	1.58999e+07	1.60944e+07	1.0522e+07	2.97783e+07	1.60031e+07	2.2317e+07	1.881e+07	1.92659e+07	2.96487e+07
1.931_217.13150	4.26703	0.000964891	0.0409074	1.7709	LL200+HS:L200	POS	1.931	217.131	C10 H19 N O4	Propionylcarnitine	NA	9.19354e-05	0.423409	level3	mzCloud	C03017	HMDB0000824	Lipids and lipid-like molecules	Fatty acid esters	Fatty Acyls	Fatty acyls[FA]	NA	NA	NA	Up	4.18056e+06	6.52364e+06	7.20967e+06	2.35551e+07	1.52367e+07	1.45632e+07	3.71486e+07	9.27133e+07	3.77763e+07	6.26058e+07	3.61729e+07	3.76897e+07
10.315_312.30288	1.79138	0.00444472	0.093722	1.0379	LL200+HS:L200	NEG	10.315	312.303	C20 H40 O2	Arachidic acid	NA	4.80572e-05	0.15388	level3	mzCloud	C06425	HMDB0002212	Lipids and lipid-like molecules	Fatty acids and conjugates	Fatty Acyls	Fatty acyls[FA]	Lipid metabolism	Biosynthesis of unsaturated fatty acids	map01040 Biosynthesis of unsaturated fatty acids	Up	1.04621e+06	911002	837699	1.61374e+06	1.56122e+06	1.82478e+06	1.81401e+06	2.1387e+06	2.54814e+06	2.04035e+06	3.14746e+06	2.27456e+06
10.354_338.31862	1.90701	0.00957214	0.114824	1.0598	LL200+HS:L200	NEG	10.354	338.319	C22 H42 O2	Erucic acid	NA	0.000137323	0.405899	level3	mzCloud	C08316	HMDB0002068	Lipids and lipid-like molecules	Fatty acids and conjugates	Fatty Acyls	Fatty acyls[FA]	Lipid metabolism	Biosynthesis of unsaturated fatty acids	map01040 Biosynthesis of unsaturated fatty acids	Up	2.4577e+06	1.59618e+06	1.20604e+06	2.48482e+06	2.48408e+06	4.26055e+06	2.97437e+06	4.1682e+06	4.58785e+06	5.60766e+06	6.24715e+06	4.04615e+06
10.439_310.28704	0.0084092	0.0292656	0.156593	2.25123	LL200+HS:L200	POS	10.439	310.287	C20 H38 O2	Ethyl oleate	NA	-0.000136263	-0.439151	level3	mzCloud	D04090	NA	NA	NA	NA	NA	NA	NA	NA	Down	6.10423e+08	2.22383e+07	2.79664e+08	1.02139e+06	8.7559e+06	5.53532e+06	1.4964e+06	1.76006e+06	1.13457e+06	598484	1.9049e+06	906284
10.726_366.35004	2.46915	0.00420892	0.0914392	1.38909	LL200+HS:L200	NEG	10.726	366.35	C24 H46 O2	Nervonic acid	NA	0.000259103	0.707255	level3	mzCloud	C08323	HMDB0002368	Lipids and lipid-like molecules	Fatty acids and conjugates	Fatty Acyls	Fatty acyls[FA]	Lipid metabolism	Biosynthesis of unsaturated fatty acids	map01040 Biosynthesis of unsaturated fatty acids	Up	1.25314e+06	1.59219e+06	947594	2.96298e+06	3.012e+06	3.09857e+06	5.10343e+06	4.24007e+06	6.17117e+06	6.03136e+06	5.5841e+06	4.63912e+06
11.209_702.56768	2.37669	0.0222491	0.14426	1.32207	LL200+HS:L200	POS	11.209	702.568	C39 H79 N2 O6 P	Palmitoyl sphingomyelin	NA	0.000101119	0.143927	level3	mzCloud	NA	NA	NA	NA	NA	NA	NA	NA	NA	Up	1.98932e+07	9.19204e+06	2.47255e+07	5.64357e+07	7.19455e+07	7.15006e+07	9.65146e+07	8.48717e+07	1.03534e+08	8.3206e+07	1.17138e+08	1.17684e+08
11.816_733.56240	2.0726	0.00742912	0.10905	1.21053	LL200+HS:L200	POS	11.816	733.562	C40 H80 N O8 P	DL-Dipalmitoylphosphatidylcholine	NA	0.000246816	0.336462	level3	mzCloud	NA	NA	NA	NA	NA	NA	NA	NA	NA	Up	2.12585e+07	1.91514e+07	2.2485e+07	4.82437e+07	4.1496e+07	5.76577e+07	6.90293e+07	6.07587e+07	6.56132e+07	7.21744e+07	8.79516e+07	8.03241e+07
2.451_284.07563	2.58118	0.008287	0.111211	1.33085	LL200+HS:L200	POS	2.451	284.076	C10 H12 N4 O6	Xanthosine	NA	-5.09617e-05	-0.179395	level3	BMDB	C01762	HMDB0000299	Nucleosides, nucleotides, and analogues	NA	Purine nucleosides	Purines and derivatives	Nucleotide metabolism	Purine metabolism	map00230 Purine metabolism; map00232 Caffeine metabolism; map01065 Biosynthesis of alkaloids derived from histidine and purine; map01100 Metabolic pathways; map01110 Biosynthesis of secondary metabolites; map02010 ABC transporters	Up	1.12525e+07	2.73163e+07	1.49818e+07	2.90512e+07	5.949e+07	3.94819e+07	1.13938e+08	3.99284e+07	8.17655e+07	4.75658e+07	1.04061e+08	8.14152e+07
2.564_143.04066	4.25705	0.00597083	0.103893	1.65475	LL200+HS:L200	POS	2.564	143.041	C6 H9 N O S	4-Methyl-5-thiazoleethanol	NA	0.000171028	1.19566	level3	mzCloud	C04294	HMDB0032985	Organoheterocyclic compounds	Thiazoles	Azoles	Organoheterocyclic compounds	Metabolism of cofactors and vitamins	Thiamine metabolism	map00730 Thiamine metabolism; map01100 Metabolic pathways	Up	326192	803266	692892	3.19797e+06	1.21481e+06	598822	1.47493e+06	9.45578e+06	1.80246e+06	6.70297e+06	4.00984e+06	5.64653e+06
2.66_110.07383	2.03515	0.0300119	0.156593	1.21475	LL200+HS:L200	POS	2.66	110.074	C7 H10 O	trans,trans-2,4-Heptadienal	NA	0.00066247	6.01845	level3	mzCloud	NA	NA	NA	NA	NA	NA	NA	NA	NA	Up	9.73447e+06	2.62726e+07	2.23083e+07	5.96437e+07	6.09411e+07	5.39968e+07	9.35305e+07	6.07497e+07	8.31234e+07	7.23867e+07	8.06806e+07	8.35083e+07
3.11_188.11629	0.129561	0.00533758	0.100648	1.78925	LL200+HS:L200	POS	3.11	188.116	C8 H16 N2 O3	N2-Acetyl-L-lysine	NA	0.000198489	1.05514	level3	BMDB	C12989	HMDB0000446	Organic acids and derivatives	Amino acids, peptides, and analogues	Carboxylic acids and derivatives	Amino acids, peptides, and analogues	NA	NA	NA	Down	1.9045e+08	4.33151e+08	3.16598e+08	4.49413e+07	4.63289e+07	1.01766e+08	1.58414e+07	3.11434e+07	1.95959e+07	2.51027e+07	3.77901e+07	1.73493e+07
3.534_280.10591	0.388557	0.0396123	0.167974	1.07578	LL200+HS:L200	POS	3.534	280.106	C13 H16 N2 O5	α-Aspartylphenylalanine	NA	-8.65651e-06	-0.0309044	level3	mzCloud	NA	HMDB0000706	Organic acids and derivatives	Amino acids, peptides, and analogues	Carboxylic acids and derivatives	Amino acids, peptides, and analogues	NA	NA	NA	Down	6.97144e+06	1.76836e+07	1.16142e+07	2.34547e+06	4.60991e+06	6.40843e+06	1.68891e+06	3.45203e+06	3.20395e+06	3.85522e+06	5.54421e+06	1.54097e+06
3.59_785.16117	2.36961	0.0326757	0.160296	1.40541	LL200+HS:L200	NEG	3.59	785.161	C27 H33 N9 O15 P2	Flavin adenine dinucleotide (FAD)	NA	0.00403628	5.14073	level3	mzCloud	C00016	HMDB0001248	Nucleosides, nucleotides, and analogues	NA	Flavin nucleotides	Nucleic acids and analogues	Metabolism of cofactors and vitamins	Riboflavin metabolism	map00740 Riboflavin metabolism; map01100 Metabolic pathways; map01110 Biosynthesis of secondary metabolites; map04977 Vitamin digestion and absorption	Up	577318	1.53336e+06	1.38212e+06	7.23779e+06	6.12965e+06	5.13196e+06	1.12637e+07	7.55378e+06	9.0647e+06	7.21742e+06	8.64118e+06	8.37218e+06
3.81_173.04781	6.54216	3.36451e-08	2.1106e-05	2.06871	LL200+HS:L200	POS	3.81	173.048	C10 H7 N O2	2-quinolinecarboxylic acid	NA	0.000130993	0.756978	level3	BMDB	C06325	HMDB0000842	Organoheterocyclic compounds	Quinoline carboxylic acids	Quinolines and derivatives	Organoheterocyclic compounds	NA	NA	NA	Up	716272	995991	851988	952277	1.18681e+06	1.21101e+06	6.87532e+06	5.25524e+06	4.51904e+06	6.46253e+06	8.38237e+06	7.19815e+06
4.082_456.10485	1.79269	0.0415032	0.17171	1.09151	LL200+HS:L200	POS	4.082	456.105	C17 H21 N4 O9 P	Flavin mononucleotide (FMN)	NA	0.000239081	0.524179	level3	mzCloud	C00061	HMDB0001520	Nucleosides, nucleotides, and analogues	NA	Flavin nucleotides	Nucleic acids and analogues	Energy metabolism	Oxidative phosphorylation	map00190 Oxidative phosphorylation; map00740 Riboflavin metabolism; map00997 Biosynthesis of various secondary metabolites - part 3; map01057 Biosynthesis of type II polyketide products; map01100 Metabolic pathways; map01110 Biosynthesis of secondary metabolites; map04977 Vitamin digestion and absorption	Up	726255	2.17791e+06	1.90854e+06	4.44721e+06	3.81856e+06	3.05827e+06	4.97317e+06	5.51745e+06	4.70606e+06	5.26636e+06	4.08959e+06	4.37551e+06
4.202_244.08829	0.405647	0.0106306	0.119808	1.14484	LL200+HS:L200	POS	4.202	244.088	C10 H16 N2 O3 S	Biotin	NA	0.000125882	0.515723	level3	BMDB	C00120	HMDB0000030	Organoheterocyclic compounds	NA	Biotin and derivatives	Organoheterocyclic compounds	Metabolism of cofactors and vitamins	Biotin metabolism	map00780 Biotin metabolism; map01100 Metabolic pathways; map02010 ABC transporters; map04977 Vitamin digestion and absorption	Down	1.02836e+06	2.67896e+06	1.29219e+06	820973	589934	947919	489591	683857	417623	541606	465766	386444
4.441_278.08785	0.0114704	8.91549e-06	0.00120954	3.1344	LL200+HS:L200	POS	4.441	278.088	C12 H14 N4 O2 S	Sulfamethazine	NA	0.00410025	14.7447	level3	mzCloud	C19530	HMDB0015522	Benzenoids	Benzenesulfonamides	Benzene and substituted derivatives	Benzene and derivatives	NA	NA	NA	Down	763755	2.50378e+06	1.42788e+06	4.45051e+06	2.96129e+06	2.68368e+06	32986.6	26696.4	30401.1	24850.2	27794.9	26928.4
4.535_296.17304	0.00843199	0.00673267	0.106084	2.58963	LL200+HS:L200	POS	4.535	296.173	C20 H24 O2	17α-Ethynylestradiol	NA	-0.00458587	-15.4835	level3	mzCloud	C07534	HMDB0001926	Lipids and lipid-like molecules	Estrane steroids	Steroids and steroid derivatives	Steroids and derivatives	NA	NA	NA	Down	5.11571e+06	7.86326e+06	1.41931e+07	185553	247417	213293	29081.8	71351.9	26800	35631.2	47637.1	24062
4.562_344.19460	0.0194267	0.00868809	0.111935	2.37757	LL200+HS:L200	POS	4.562	344.195	C21 H28 O4	Nor-9-carboxy-δ9-THC	NA	-0.00415653	-12.076	level3	mzCloud	NA	NA	NA	NA	NA	NA	NA	NA	NA	Down	5.75729e+06	3.37434e+06	2.23011e+06	44915.5	193237	396571	86211.4	20788.6	55122.4	22657.5	25244.7	23027.1
4.571_156.05363	0.00234782	6.12088e-08	3.07176e-05	3.75997	LL200+HS:L200	POS	4.571	156.054	C6 H8 N2 O3	Imidazolelactic acid	NA	0.000133022	0.852414	level3	mzCloud	NA	HMDB0002320	Organoheterocyclic compounds	Imidazoles	Azoles	Imidazoles	NA	NA	NA	Down	3.78174e+07	5.48378e+07	6.66356e+07	1.16902e+08	8.81237e+07	8.19795e+07	320566	85734.8	231380	233867	122474	53799.7
5.083_322.05122	0.478547	0.00817108	0.110707	1.0474	LL200+HS:L200	NEG	5.083	322.051	C10 H15 N2 O8 P	Thymidine 5'-monophosphate	NA	-0.00538273	-16.7136	level3	mzCloud	C00364	HMDB0001227	Nucleosides, nucleotides, and analogues	Pyrimidine deoxyribonucleotides	Pyrimidine nucleotides	Nucleic acids and analogues	Nucleotide metabolism	Pyrimidine metabolism	map00240 Pyrimidine metabolism; map01100 Metabolic pathways; map01523 Antifolate resistance	Down	5.00847e+06	1.3577e+07	1.1131e+07	9.35426e+06	5.22201e+06	6.25558e+06	3.85279e+06	3.79062e+06	2.62502e+06	5.2556e+06	3.6013e+06	5.06437e+06
5.421_222.08914	1.82194	0.00819692	0.110707	1.02982	LL200+HS:L200	NEG	5.421	222.089	C12 H14 O4	Monobutyl phthalate	NA	-6.89051e-05	-0.310259	level3	mzCloud	NA	HMDB0013247	Benzenoids	Benzoic acids and derivatives	Benzene and substituted derivatives	Benzene and derivatives	NA	NA	NA	Up	112211	162381	161751	223346	237918	223098	298426	245756	484596	495628	247390	270060
6.6_258.08925	1.71947	0.0437986	0.174562	1.00326	LL200+HS:L200	POS	6.6	258.089	C15 H14 O4	Yangonin	NA	4.15312e-05	0.160918	level3	mzCloud	C09980	HMDB0034144	Phenylpropanoids and polyketides	NA	Kavalactones	Polyketides[PK]	Chemical structure transformation maps	Biosynthesis of phenylpropanoids	map01061 Biosynthesis of phenylpropanoids	Up	303211	724537	372479	382925	122390	218005	516813	545833	387788	769225	722378	709346
6.802_250.11817	3.01983	0.0414728	0.171655	1.26875	LL200+HS:L200	POS	6.802	250.118	C14 H18 O4	Coenzyme Q1	NA	-0.00233925	-9.35248	level3	mzCloud	NA	HMDB0002012	Lipids and lipid-like molecules	Quinone and hydroquinone lipids	Prenol lipids	Quinone	NA	NA	NA	Up	1.04607e+06	2.2458e+06	1.66903e+06	1.69248e+06	433334	431587	4.10686e+06	8.09019e+06	2.78337e+06	5.33997e+06	894198	1.48937e+06
7.414_354.24076	0.281174	0.044224	0.175364	1.22159	LL200+HS:L200	NEG	7.414	354.241	C20 H34 O5	Prostaglandin E1	NA	0.00013181	0.372091	level3	mzCloud	C04741	HMDB0001442	Lipids and lipid-like molecules	Eicosanoids	Fatty Acyls	Fatty acyls[FA]	NA	NA	NA	Down	4.91433e+06	937226	1.71079e+06	376847	845599	684476	191901	740376	474126	466135	411845	378128
7.572_122.07324	1.78223	0.0137956	0.127937	1.05705	LL200+HS:L200	POS	7.572	122.073	C8 H10 O	1-Phenylethanol	NA	7.50258e-05	0.614597	level3	BMDB	C07112	HMDB0032619	Benzenoids	NA	Benzene and substituted derivatives	Benzene and derivatives	NA	NA	NA	Up	3.97577e+06	4.42588e+06	4.73668e+06	1.02782e+07	9.89937e+06	8.80157e+06	1.49125e+07	1.37134e+07	1.36001e+07	1.00604e+07	1.08448e+07	1.1932e+07
7.649_354.24077	0.312394	0.0287037	0.156491	1.2561	LL200+HS:L200	NEG	7.649	354.241	C20 H34 O5	8-iso Prostaglandin F2β	NA	0.000146992	0.414949	level3	mzCloud	NA	NA	NA	NA	NA	NA	NA	NA	NA	Down	2.81182e+06	1.97898e+06	1.6763e+06	575642	1.14675e+06	360822	103867	598482	525251	501407	539322	402736
7.958_314.24560	0.530088	0.00113718	0.0459257	1.1002	LL200+HS:L200	NEG	7.958	314.246	C18 H34 O4	(+/-)9,10-dihydroxy-12Z-octadecenoic acid	NA	-0.000105926	-0.337081	level3	mzCloud	NA	NA	NA	NA	NA	NA	NA	NA	NA	Down	1.26806e+07	1.54872e+07	8.12053e+06	1.02519e+07	9.50126e+06	8.5917e+06	6.9154e+06	7.94629e+06	4.33569e+06	5.02146e+06	5.51325e+06	4.52917e+06
8.157_362.24596	0.350744	0.00590699	0.103893	1.25775	LL200+HS:L200	NEG	8.157	362.246	C22 H34 O4	(+/-)7(8)-DiHDPA	NA	0.00025536	0.704935	level3	mzCloud	NA	NA	NA	NA	NA	NA	NA	NA	NA	Down	6.2266e+06	1.51251e+07	6.31952e+06	5.24795e+06	4.65217e+06	2.86949e+06	1.85956e+06	3.48304e+06	3.126e+06	2.18065e+06	1.61769e+06	1.91743e+06
8.275_314.24623	0.442847	0.00828791	0.111211	1.16819	LL200+HS:L200	POS	8.275	314.246	C18 H34 O4	(+/-)12(13)-DiHOME	NA	0.000521367	1.65911	level3	mzCloud	C14829	HMDB0004705	Lipids and lipid-like molecules	Fatty acids and conjugates	Fatty Acyls	Fatty acyls[FA]	Lipid metabolism	Linoleic acid metabolism	map00591 Linoleic acid metabolism	Down	3.76273e+06	1.57288e+06	2.43522e+06	1.30097e+06	1.90166e+06	1.06621e+06	751133	1.27505e+06	880540	863267	710175	851567
8.402_272.23503	2.91462	0.0052991	0.100543	1.40616	LL200+HS:L200	NEG	8.402	272.235	C16 H32 O3	16-Hydroxyhexadecanoic acid	NA	-0.00011252	-0.413319	level3	mzCloud	C18218	HMDB0006294	Lipids and lipid-like molecules	Fatty acids and conjugates	Fatty Acyls	Fatty acyls[FA]	Lipid metabolism	Cutin, suberine and wax biosynthesis	map00073 Cutin, suberine and wax biosynthesis; map01100 Metabolic pathways	Up	3.76104e+06	2.13136e+06	4.93579e+06	1.13593e+07	2.98919e+06	6.31123e+06	2.60602e+07	1.55748e+07	2.18761e+07	1.14605e+07	7.32413e+06	9.47959e+06
8.518_296.23509	0.242044	0.0321546	0.159765	1.33044	LL200+HS:L200	NEG	8.518	296.235	C18 H32 O3	(+/-)13-HODE	NA	-5.46467e-05	-0.184471	level3	mzCloud	NA	NA	NA	NA	NA	NA	NA	NA	NA	Down	4.77441e+08	5.6491e+07	8.45302e+07	4.15319e+07	6.79108e+07	6.8257e+07	2.03817e+07	4.4181e+07	2.48566e+07	3.29939e+07	3.78233e+07	3.24696e+07
8.518_332.23353	0.0901511	0.0219499	0.14393	1.71675	LL200+HS:L200	NEG	8.518	332.234	C21 H32 O3	17α-Hydroxypregnenolone	NA	-0.00161094	-4.8488	level3	mzCloud	C05138	HMDB0000363	Lipids and lipid-like molecules	Pregnane steroids	Steroids and steroid derivatives	Steroids and derivatives	Lipid metabolism	Steroid hormone biosynthesis	map00140 Steroid hormone biosynthesis; map01100 Metabolic pathways; map04913 Ovarian steroidogenesis; map04927 Cortisol synthesis and secretion; map04934 Cushing syndrome	Down	505153	36280.6	74684.2	18034.9	25614.7	31941	11233.7	10368.8	9987.38	9673.84	11246.2	9848.28
8.569_336.23028	0.238203	0.00850975	0.111921	1.51744	LL200+HS:L200	NEG	8.569	336.23	C20 H30 O3	(+/-)18-HEPE	NA	18.0108	56598.6	level3	mzCloud	NA	NA	NA	NA	NA	NA	NA	NA	NA	Down	8.71462e+06	2.80154e+06	6.33866e+06	1.38185e+06	1.46741e+06	1.85405e+06	491314	1.90364e+06	476808	782776	890732	828139
8.653_320.23527	0.268919	0.0308843	0.15789	1.2855	LL200+HS:L200	NEG	8.653	320.235	C20 H32 O3	11,12-Epoxy-(5Z,8Z,11Z)-icosatrienoic acid	NA	0.00012358	0.385905	level3	mzCloud	C14770	NA	FA Fatty acyls	FA0305 Hydroxy/hydroperoxyeicosatrienoic acids	FA03 Eicosanoids	Fatty acyls[FA]	Lipid metabolism	Arachidonic acid metabolism	map00590 Arachidonic acid metabolism; map01100 Metabolic pathways; map04270 Vascular smooth muscle contraction; map04726 Serotonergic synapse; map04913 Ovarian steroidogenesis	Down	8.10133e+07	3.55884e+07	2.3442e+07	8.69633e+06	1.12163e+07	1.28213e+07	7.48199e+06	1.07184e+07	8.51753e+06	6.77617e+06	6.4376e+06	6.53137e+06
8.735_364.26154	0.27551	0.0340909	0.162772	1.28105	LL200+HS:L200	NEG	8.735	364.262	C22 H36 O4	Prostaglandin A1 ethyl ester	NA	0.00018328	0.503155	level3	mzCloud	NA	NA	NA	NA	NA	NA	NA	NA	NA	Down	3.16869e+07	1.20569e+07	8.57533e+06	2.49241e+06	5.25847e+06	5.13273e+06	1.53944e+06	4.87274e+06	1.78625e+06	2.82034e+06	4.07943e+06	2.86577e+06
8.836_399.33445	3.00074	0.0169293	0.134112	1.47518	LL200+HS:L200	POS	8.836	399.334	C23 H45 N O4	PALMITOYLCARNITINE	NA	-0.000411393	-1.0302	level3	BMDB	C02990	HMDB0000846	NA	NA	NA	NA	Lipid metabolism	Fatty acid degradation	map00071 Fatty acid degradation; map01212 Fatty acid metabolism	Up	5.36316e+06	2.43902e+06	9.51791e+06	3.16114e+07	2.32859e+07	1.63979e+07	6.95085e+07	5.79546e+07	3.16687e+07	3.23806e+07	2.27169e+07	5.16815e+07
9.003_330.21720	0.0910554	0.0109242	0.120248	1.85	LL200+HS:L200	POS	9.003	330.217	C21 H30 O3	17α-Hydroxyprogesterone	NA	-0.00229705	-6.95614	level3	mzCloud	C01176	HMDB0000374	Lipids and lipid-like molecules	Pregnane steroids	Steroids and steroid derivatives	Steroids and derivatives	Lipid metabolism	Steroid hormone biosynthesis	map00140 Steroid hormone biosynthesis; map01100 Metabolic pathways; map04913 Ovarian steroidogenesis; map04927 Cortisol synthesis and secretion; map04934 Cushing syndrome	Down	5.65536e+06	519333	2.06468e+06	602695	256269	273124	72801.9	69829.2	68427.7	157976	272315	211972
9.155_322.25068	0.188069	0.0375872	0.166006	1.39908	LL200+HS:L200	POS	9.155	322.251	C20 H32 O2	Arachidonic acid	NA	18.0105	59198.1	level3	mzCloud	C00219	HMDB0001043	Lipids and lipid-like molecules	Fatty acids and conjugates	Fatty Acyls	Fatty acyls[FA]	Lipid metabolism	Arachidonic acid metabolism	map00590 Arachidonic acid metabolism; map00591 Linoleic acid metabolism; map01040 Biosynthesis of unsaturated fatty acids; map01100 Metabolic pathways; map04216 Ferroptosis; map04217 Necroptosis; map04270 Vascular smooth muscle contraction; map04611 Platelet activation; map04664 Fc epsilon RI signaling pathway; map04666 Fc gamma R-mediated phagocytosis; map04723 Retrograde endocannabinoid signali…	Down	9.28471e+06	1.65212e+06	2.5938e+06	551895	481433	1.95144e+06	149940	597830	569337	572943	509208	706780
9.376_453.28584	1.78878	0.0108709	0.120248	1.02621	LL200+HS:L200	POS	9.376	453.286	C21 H44 N O7 P	Glycerophospho-N-palmitoyl ethanolamine	NA	0.000299932	0.661685	level3	mzCloud	NA	NA	NA	NA	NA	NA	NA	NA	NA	Up	4.07904e+07	4.80729e+07	4.50959e+07	8.52243e+07	8.69164e+07	9.87674e+07	7.2017e+07	1.21465e+08	1.25857e+08	1.55302e+08	1.2748e+08	1.22098e+08
9.592_268.24020	0.39073	0.0194115	0.138259	1.23564	LL200+HS:L200	NEG	9.592	268.24	C17 H32 O2	trans-10-Heptadecenoic acid	NA	-3.4545e-05	-0.128784	level3	mzCloud	NA	NA	NA	NA	NA	NA	NA	NA	NA	Down	3.8306e+07	9.49464e+06	3.74699e+07	2.51017e+07	5.43602e+07	4.5542e+07	9.47257e+06	9.51933e+06	9.10074e+06	1.35157e+07	2.15538e+07	1.89983e+07
9.894_327.31350	2.11977	0.0183721	0.136225	1.22615	LL200+HS:L200	POS	9.894	327.313	C20 H41 N O2	N,N-Dimethylsphingosine	NA	-0.000227183	-0.694083	level3	mzCloud	C13914	HMDB0013645	Organic nitrogen compounds	Amines	Organonitrogen compounds	Amines	NA	NA	NA	Up	3.27156e+06	4.8975e+06	4.522e+06	1.6471e+07	1.01132e+07	1.29424e+07	1.58539e+07	1.68542e+07	2.66e+07	1.45869e+07	2.23062e+07	1.44882e+07
9.897_300.20388	2.1889	0.0122906	0.124887	1.24794	LL200+HS:L200	POS	9.897	300.204	C20 H28 O2	Isotretinoin	NA	-0.00504527	-16.8059	level3	mzCloud	C07058	HMDB0006219	Lipids and lipid-like molecules	Retinoids	Prenol lipids	Prenol lipids[PR]	NA	NA	NA	Up	2.51904e+06	8.33133e+06	7.7342e+06	1.24088e+07	9.41856e+06	1.05757e+07	2.4394e+07	1.36263e+07	2.58148e+07	1.48288e+07	1.79944e+07	1.49482e+07
0.565_243.12185	2.5217	0.0128433	0.125681	1.2636	LL200+HS:L200	POS	0.565	243.122	C10 H17 N3 O4	L-Glutaminyl-L-proline	-5.40037e-05	-0.222126	NA	level4	ChemSpider	NA	NA	NA	NA	NA	NA	NA	NA	NA	Up	239976	621316	647373	545702	1.15629e+06	1.07519e+06	2.08754e+06	974112	3.24711e+06	1.74426e+06	1.91989e+06	834696
0.572_189.11133	0.209422	0.0166681	0.133222	1.43988	LL200+HS:L200	POS	0.572	189.111	C7 H15 N3 O3	Homocitrulline	-8.04549e-06	-0.0425436	NA	level4	ChemSpider	NA	NA	NA	NA	NA	NA	NA	NA	NA	Down	983047	2.27413e+06	1.78332e+06	346403	308640	374948	264057	192288	254339	202121	194776	163713
0.575_203.12671	0.127141	0.00586971	0.103893	1.79104	LL200+HS:L200	POS	0.575	203.127	C8 H17 N3 O3	Gly-Lys	-0.000286186	-1.4089	NA	level4	ChemSpider	NA	NA	NA	NA	NA	NA	NA	NA	NA	Down	1.11972e+07	2.24494e+07	1.57983e+07	1.6584e+06	2.73432e+06	4.56369e+06	384686	909321	1.13389e+06	1.315e+06	2.55674e+06	1.12554e+06
0.577_274.16396	0.15404	0.00814636	0.110707	1.6868	LL200+HS:L200	POS	0.577	274.164	C11 H22 N4 O4	gln-lys	-0.000147559	-0.538215	NA	level4	ChemSpider	NA	NA	NA	NA	NA	NA	NA	NA	NA	Down	1.04202e+06	2.03016e+06	1.90987e+06	202950	298176	490156	119512	153840	118643	109459	301719	116958
0.586_261.13191	0.444823	0.0259857	0.151135	1.04042	LL200+HS:L200	POS	0.586	261.132	C10 H19 N3 O5	Asp-lys	-0.000556526	-2.1312	NA	level4	ChemSpider	NA	NA	NA	NA	NA	NA	NA	NA	NA	Down	1.4998e+06	3.42204e+06	1.44455e+06	616800	1.02802e+06	1.48589e+06	548782	465815	792144	591999	1.15972e+06	666075
0.588_167.98230	5.1903	0.0173185	0.134858	2.14245	LL200+HS:L200	NEG	0.588	167.982	C3 H5 O6 P	Phosphoenolpyruvic acid	-7.62577e-05	-0.453962	NA	level4	ChemSpider	NA	NA	NA	NA	NA	NA	NA	NA	NA	Up	72872	80603.2	76924.2	5.66203e+06	1.95041e+06	1.29137e+06	1.90146e+07	8.92057e+06	6.2393e+06	5.19225e+06	2.69736e+06	5.34522e+06
0.594_370.07463	0.164385	0.0251241	0.150095	1.46962	LL200+HS:L200	NEG	0.594	370.075	C12 H18 O13	Digalacturonic acid	-0.000111415	-0.301061	NA	level4	ChemSpider	NA	NA	NA	NA	NA	NA	NA	NA	NA	Down	131815	283888	1.17676e+06	609927	1.72096e+06	154170	131912	107077	113484	100453	105232	112126
0.597_574.16552	0.169358	0.0255158	0.150826	1.50126	LL200+HS:L200	POS	0.597	574.166	C35 H26 O8	3'-(3,5-Dihydroxyphenyl)-6'-hydroxy-2,2'-bis(4-hydroxyphenyl)-2,2',3,3'-tetrahydro-3,4'-bi-1-benzofuran-5-carbaldehyde	0.00275212	4.79328	NA	level4	ChemSpider	NA	NA	NA	NA	NA	NA	NA	NA	NA	Down	1.5577e+06	3.51694e+06	1.9321e+06	224820	267604	462773	287949	89516.6	355448	88123.3	412017	115366
0.598_97.96750	1.69391	0.0331385	0.16135	1.00986	LL200+HS:L200	NEG	0.598	97.9675	H2 O4 S	Sulfuric acid	0.000125793	1.28403	NA	level4	ChemSpider	NA	NA	NA	NA	NA	NA	NA	NA	NA	Up	4.29736e+06	6.53895e+06	7.76386e+06	1.42063e+07	1.43997e+07	1.60833e+07	2.11093e+07	1.68128e+07	1.75287e+07	1.85423e+07	1.55026e+07	1.77106e+07
0.61_301.05625	2.45262	0.0429021	0.173744	1.52158	LL200+HS:L200	NEG	0.61	301.056	C8 H16 N O9 P	N-Acetylglucosamine 1-phosphate	-2.19892e-05	-0.0730401	NA	level4	ChemSpider	NA	NA	NA	NA	NA	NA	NA	NA	NA	Up	462994	1.28333e+06	948621	8.62668e+06	9.63354e+06	9.16697e+06	1.53235e+07	1.0834e+07	1.26989e+07	1.18617e+07	1.20043e+07	1.11559e+07
0.611_225.94405	2.59926	0.0419467	0.172351	1.33876	LL200+HS:L200	POS	0.611	225.944	C6 H4 Cl2 O5	(2E)-2,5-Dichloro-4-oxo-2-hexenedioic acid	0.000474065	2.09816	NA	level4	ChemSpider	NA	NA	NA	NA	NA	NA	NA	NA	NA	Up	296191	145200	525683	2.56741e+06	1.47748e+06	1.17428e+06	2.45804e+06	2.14888e+06	3.45205e+06	4.69701e+06	734563	2.58916e+06
0.613_301.04671	2.20764	0.0291653	0.156593	1.26445	LL200+HS:L200	NEG	0.613	301.047	C8 H15 N O9 S	N-Acetylgalactosamine 6-sulfate	-4.62091e-05	-0.153495	NA	level4	ChemSpider	NA	NA	NA	NA	NA	NA	NA	NA	NA	Up	157218	93597.3	112842	119586	107128	995783	1.20231e+06	829817	381714	404768	367461	315584
0.616_280.03397	1.8603	0.0264844	0.152383	1.1054	LL200+HS:L200	NEG	0.616	280.034	C12 H12 N2 O2 S2	1-Methoxy-2'-(methylsulfanyl)-4'H-spiro[indole-3,5'-[1,3]thiazol]-2(1H)-one	-5.16147e-05	-0.184316	NA	level4	ChemSpider	NA	NA	NA	NA	NA	NA	NA	NA	NA	Up	2.11961e+06	4.7302e+06	3.56405e+06	9.43351e+06	8.9156e+06	7.4124e+06	1.19057e+07	8.82169e+06	1.2726e+07	8.85369e+06	1.25768e+07	1.24131e+07
0.616_354.05943	1.73179	0.00160832	0.0566412	1.04136	LL200+HS:L200	POS	0.616	354.059	C9 H15 N4 O9 P	5-amino-6-(5-phospho-beta-D-ribosylamino)uracil	0.00177045	5.00044	NA	level4	ChemSpider	NA	NA	NA	NA	NA	NA	NA	NA	NA	Up	858189	1.64656e+06	1.01981e+06	1.23699e+06	1.21817e+06	1.25638e+06	1.62625e+06	2.40703e+06	2.68147e+06	1.60333e+06	2.39804e+06	1.81531e+06
0.621_115.02693	0.413473	0.0162469	0.13247	1.13431	LL200+HS:L200	NEG	0.621	115.027	C4 H5 N O3	Maleamic acid	-8.37402e-06	-0.0728005	NA	level4	ChemSpider	NA	NA	NA	NA	NA	NA	NA	NA	NA	Down	8.67532e+06	1.41814e+07	8.86508e+06	4.25972e+06	3.20529e+06	5.87136e+06	3.94914e+06	2.63018e+06	2.82946e+06	2.87492e+06	2.99426e+06	3.35235e+06
0.631_130.07423	0.293235	0.0108639	0.120248	1.39671	LL200+HS:L200	NEG	0.631	130.074	C5 H10 N2 O2	(2S)-2-Piperazinecarboxylic acid	5.60332e-06	0.0430779	NA	level4	ChemSpider	NA	NA	NA	NA	NA	NA	NA	NA	NA	Down	6.51246e+06	1.10672e+07	7.45609e+06	1.39172e+06	3.59555e+06	5.737e+06	1.71652e+06	1.49013e+06	803514	1.61908e+06	3.32252e+06	1.53432e+06
0.637_169.05040	2.01392	0.0161789	0.13247	1.17826	LL200+HS:L200	NEG	0.637	169.05	C4 H12 N O4 P	P-DMEA	7.20588e-06	0.0426257	NA	level4	ChemSpider	NA	NA	NA	NA	NA	NA	NA	NA	NA	Up	6.30911e+06	1.30374e+07	9.3402e+06	2.3833e+07	2.74375e+07	1.86354e+07	2.95668e+07	2.14635e+07	4.06337e+07	3.16538e+07	3.64521e+07	3.87877e+07
0.637_206.00667	0.462935	0.0382862	0.166515	1.01629	LL200+HS:L200	POS	0.637	206.007	C6 H6 O8	3-Oxalomalic acid	0.000399057	1.93711	NA	level4	ChemSpider	NA	NA	NA	NA	NA	NA	NA	NA	NA	Down	5.64712e+06	8.29621e+06	1.04691e+07	2.35042e+06	2.71874e+06	4.93992e+06	1.95523e+06	1.68941e+06	1.5822e+06	6.31531e+06	2.01949e+06	2.37329e+06
0.638_198.94720	2.55122	0.0247638	0.150095	1.24496	LL200+HS:L200	NEG	0.638	198.947	C3 H6 Br N O4	bronopol	-0.000821229	-4.12786	NA	level4	ChemSpider	NA	NA	NA	NA	NA	NA	NA	NA	NA	Up	1.16497e+06	305201	515034	891914	949247	3.75401e+06	7.9759e+06	2.35678e+06	2.04178e+06	2.36525e+06	2.71235e+06	1.88715e+06
0.64_133.05672	0.242439	0.00310055	0.0766507	1.65371	LL200+HS:L200	NEG	0.64	133.057	C5 H11 N O S	(1E)-N-Hydroxy-4-(methylsulfanyl)-1-butanimine	0.000584166	4.39037	NA	level4	ChemSpider	NA	NA	NA	NA	NA	NA	NA	NA	NA	Down	2.67479e+06	5.09735e+06	1.64395e+06	1.18588e+06	1.1191e+06	2.15404e+06	876107	509335	150954	402129	1.09678e+06	328557
0.643_171.95155	2.18498	0.0159955	0.132186	1.22706	LL200+HS:L200	NEG	0.643	171.952	C6 H5 Br O	2-Bromophenol	-0.000825818	-4.8026	NA	level4	ChemSpider	NA	NA	NA	NA	NA	NA	NA	NA	NA	Up	95551.9	143781	124832	417924	382386	221924	464963	410755	594074	695042	245578	618841
0.643_244.04603	0.386494	0.00278027	0.0732429	1.31215	LL200+HS:L200	NEG	0.643	244.046	C8 H12 N4 O S2	MFCD00942304	0.00077385	3.17093	NA	level4	ChemSpider	NA	NA	NA	NA	NA	NA	NA	NA	NA	Down	1.93287e+06	3.54631e+06	2.2057e+06	1.20661e+06	1.2491e+06	1.56928e+06	840581	658131	927218	339169	1.15566e+06	605036
0.643_298.06779	0.184254	0.0442384	0.175364	1.35201	LL200+HS:L200	NEG	0.643	298.068	C17 H14 O3 S	Zaltoprofen	0.00142807	4.79111	NA	level4	ChemSpider	NA	NA	NA	NA	NA	NA	NA	NA	NA	Down	1.19885e+06	1.6099e+06	1.55017e+06	192163	146459	233540	161092	143437	154917	151608	158813	138702
0.645_86.04816	0.402314	0.014486	0.128328	1.17821	LL200+HS:L200	POS	0.645	86.0482	C3 H6 N2 O	N-NITROSOMETHYLVINYLAMINE	0.000144275	1.67668	NA	level4	ChemSpider	NA	NA	NA	NA	NA	NA	NA	NA	NA	Down	4.89176e+06	1.14165e+07	2.87539e+06	3.80478e+06	5.62371e+06	1.09243e+07	3.98165e+06	2.1798e+06	1.54495e+06	2.49906e+06	4.03288e+06	1.66771e+06
0.648_266.02771	0.292503	0.0308971	0.15789	1.29511	LL200+HS:L200	NEG	0.648	266.028	C14 H12 Cl2 O	Chlorfenethol	0.00119107	4.47727	NA	level4	ChemSpider	NA	NA	NA	NA	NA	NA	NA	NA	NA	Down	1.895e+06	2.29339e+06	2.78737e+06	372075	434455	1.02736e+06	565069	224325	124571	879584	381297	402003
0.648_282.00182	0.321049	0.0468863	0.17963	1.14669	LL200+HS:L200	NEG	0.648	282.002	C12 H10 O4 S2	(1E)-4-{6-[(Formyloxy)methyl]-1,2-dithiin-3-yl}-1-buten-3-yn-1-yl acetate	-0.000234225	-0.830579	NA	level4	ChemSpider	NA	NA	NA	NA	NA	NA	NA	NA	NA	Down	2.35544e+06	4.37279e+06	3.92784e+06	561208	698470	1.72095e+06	968988	497465	362957	1.00186e+06	969549	577225
0.649_248.04092	0.443669	0.00630648	0.104113	1.12295	LL200+HS:L200	NEG	0.649	248.041	C12 H6 F2 N2 O2	fludioxonil	0.00118729	4.78669	NA	level4	ChemSpider	NA	NA	NA	NA	NA	NA	NA	NA	NA	Down	2.86214e+06	6.28379e+06	5.08183e+06	2.96174e+06	2.38581e+06	2.09725e+06	1.55149e+06	1.63309e+06	1.9767e+06	1.51034e+06	1.88053e+06	1.06329e+06
0.649_304.91152	2.64387	0.0182576	0.136225	1.26748	LL200+HS:L200	POS	0.649	304.912	C9 H5 Cl I N O	Clioquinol	0.00108164	3.54742	NA	level4	ChemSpider	NA	NA	NA	NA	NA	NA	NA	NA	NA	Up	603710	506696	423255	1.0374e+06	1.05379e+06	2.21841e+06	3.32025e+06	2.82345e+06	2.72823e+06	4.03509e+06	703324	1.83848e+06
0.649_331.07824	0.222912	0.0380552	0.166364	1.3336	LL200+HS:L200	NEG	0.649	331.078	C18 H18 Cl N O S	Zotepine	-0.00151915	-4.58848	NA	level4	ChemSpider	NA	NA	NA	NA	NA	NA	NA	NA	NA	Down	1.02902e+06	1.98551e+06	702065	134894	162453	483820	172290	92495.9	114044	192510	340260	91008
0.651_141.01924	2.18053	0.0224303	0.14437	1.21605	LL200+HS:L200	POS	0.651	141.019	C2 H8 N O4 P	phosphoethanolamine	0.000146742	1.04058	NA	level4	ChemSpider	NA	NA	NA	NA	NA	NA	NA	NA	NA	Up	4.72485e+06	2.07903e+06	2.61675e+06	7.30648e+06	1.22083e+07	1.05412e+07	1.76953e+07	1.25973e+07	1.70207e+07	1.59914e+07	8.37259e+06	1.44026e+07
0.651_257.10301	0.434105	0.0259686	0.151135	1.07401	LL200+HS:L200	POS	0.651	257.103	C8 H20 N O6 P	L-alpha-Glycerylphosphorylcholine	0.000190612	0.741383	NA	level4	ChemSpider	NA	NA	NA	NA	NA	NA	NA	NA	NA	Down	6.47955e+08	7.55912e+08	9.54252e+08	2.5112e+08	3.3204e+08	2.62775e+08	3.11916e+08	1.3847e+08	2.08286e+08	1.83957e+08	3.51641e+08	1.96627e+08
0.653_257.10224	0.326066	0.0348896	0.164322	1.14321	LL200+HS:L200	POS	0.653	257.102	C10 H15 N3 O5	Benserazide	0.00107176	4.16861	NA	level4	ChemSpider	NA	NA	NA	NA	NA	NA	NA	NA	NA	Down	6.47955e+08	1.79163e+09	9.614e+08	2.76277e+08	3.3204e+08	2.62775e+08	3.09499e+08	1.3847e+08	2.10148e+08	1.86596e+08	3.51641e+08	1.96627e+08
0.656_163.08446	0.486752	0.0135222	0.127678	1.03104	LL200+HS:L200	NEG	0.656	163.084	C6 H13 N O4	Bicine	6.67404e-06	0.0409238	NA	level4	ChemSpider	NA	NA	NA	NA	NA	NA	NA	NA	NA	Down	1.84193e+07	3.46289e+07	2.6043e+07	1.19806e+07	1.16836e+07	1.55367e+07	1.39081e+07	5.2942e+06	1.19578e+07	7.45344e+06	8.26983e+06	1.06955e+07
0.656_207.07418	2.0016	0.00913754	0.112674	1.14716	LL200+HS:L200	POS	0.656	207.074	C8 H17 N O S2	Dihydrolipoamide	-0.000972311	-4.69545	NA	level4	ChemSpider	NA	NA	NA	NA	NA	NA	NA	NA	NA	Up	1.19929e+07	1.60549e+07	2.45195e+07	3.20286e+07	3.5405e+07	3.79276e+07	4.6141e+07	5.29241e+07	7.85399e+07	3.62714e+07	5.46412e+07	4.75929e+07
0.658_100.06369	0.394313	0.0333528	0.161416	1.11439	LL200+HS:L200	POS	0.658	100.064	C4 H8 N2 O	NPYR	3.06993e-05	0.306798	NA	level4	ChemSpider	NA	NA	NA	NA	NA	NA	NA	NA	NA	Down	1.68672e+07	2.11406e+07	1.82285e+07	4.28811e+06	5.10186e+06	1.15207e+07	7.35422e+06	2.60232e+06	2.96335e+06	8.56556e+06	4.52808e+06	4.40651e+06
0.658_189.06342	2.0016	0.00913754	0.112674	1.14716	LL200+HS:L200	POS	0.658	189.063	C7 H11 N O5	N-Acetyl-L-glutamic acid	-0.000301783	-1.5962	NA	level4	ChemSpider	NA	NA	NA	NA	NA	NA	NA	NA	NA	Up	1.19929e+07	1.60549e+07	2.45195e+07	3.20286e+07	3.5405e+07	3.79276e+07	4.6141e+07	5.29241e+07	7.85399e+07	3.62714e+07	5.46412e+07	4.75929e+07
0.66_299.12155	0.565788	0.00130011	0.0494288	1.06167	LL200+HS:L200	NEG	0.66	299.122	C15 H17 N5 S	pentiapine	0.00108362	3.62268	NA	level4	ChemSpider	NA	NA	NA	NA	NA	NA	NA	NA	NA	Down	3.52883e+07	4.14013e+07	4.62716e+07	3.05317e+07	2.95839e+07	3.43486e+07	2.30399e+07	1.85792e+07	2.15408e+07	1.86917e+07	2.80084e+07	1.31566e+07
0.662_160.08476	0.352307	0.00789302	0.110186	1.25729	LL200+HS:L200	NEG	0.662	160.085	C6 H12 N2 O3	Daminozide	-3.64936e-05	-0.227964	NA	level4	ChemSpider	NA	NA	NA	NA	NA	NA	NA	NA	NA	Down	2.79469e+06	5.84883e+06	2.9654e+06	1.25682e+06	1.67369e+06	1.54416e+06	1.33709e+06	756184	1.21297e+06	699255	747254	913600
0.666_326.13252	0.513546	0.0145583	0.128575	1.00751	LL200+HS:L200	NEG	0.666	326.133	C20 H19 F O3	3-(4-Fluorophenyl)-2,2,4-trimethyl-2H-chromen-7-yl acetate	0.000697156	2.13765	NA	level4	ChemSpider	NA	NA	NA	NA	NA	NA	NA	NA	NA	Down	1.0676e+07	1.29891e+07	1.46998e+07	5.25855e+06	5.88947e+06	8.79187e+06	5.26082e+06	4.2489e+06	5.21679e+06	5.73294e+06	5.52216e+06	3.96061e+06
0.668_176.07965	0.385953	0.000576345	0.0299991	1.42388	LL200+HS:L200	POS	0.668	176.08	C6 H12 N2 O4	ala-ser	-6.10401e-05	-0.346662	NA	level4	ChemSpider	NA	NA	NA	NA	NA	NA	NA	NA	NA	Down	4.98767e+06	7.79508e+06	4.87324e+06	5.03111e+06	5.09576e+06	8.31088e+06	1.9297e+06	1.82172e+06	2.17215e+06	1.91899e+06	4.57697e+06	1.51094e+06
0.67_190.09533	0.216099	0.017753	0.135354	1.41762	LL200+HS:L200	NEG	0.67	190.095	C7 H14 N2 O4	meso-2,6-Diaminopimelic acid	-2.57234e-05	-0.135319	NA	level4	ChemSpider	NA	NA	NA	NA	NA	NA	NA	NA	NA	Down	5.79815e+06	1.10367e+07	5.95161e+06	1.17973e+06	1.70137e+06	1.61501e+06	485821	905425	1.16943e+06	1.21149e+06	1.32816e+06	795399
0.67_247.06901	2.00291	0.00492959	0.0973982	1.10467	LL200+HS:L200	POS	0.67	247.069	C9 H13 N O7	N(2)-succinyl-L-glutamic acid	-0.0001898	-0.768204	NA	level4	ChemSpider	NA	NA	NA	NA	NA	NA	NA	NA	NA	Up	3.88059e+06	6.05885e+06	6.47462e+06	6.03292e+06	8.28864e+06	6.49741e+06	9.52991e+06	1.37708e+07	1.9226e+07	6.63607e+06	1.34369e+07	1.19748e+07
0.672_248.02981	2.54542	0.0128189	0.125681	1.427	LL200+HS:L200	POS	0.672	248.03	C10 H7 F3 O4	Triflusal	0.000171196	0.690222	NA	level4	ChemSpider	NA	NA	NA	NA	NA	NA	NA	NA	NA	Up	3.66015e+06	7.10717e+06	1.04342e+07	1.94961e+07	2.49814e+07	1.93373e+07	2.89732e+07	3.89839e+07	4.2164e+07	3.24342e+07	3.19979e+07	4.1849e+07
0.673_232.05586	2.54432	0.0138609	0.127961	1.39033	LL200+HS:L200	POS	0.673	232.056	C13 H12 O2 S	(2Z)-3-{5-[(4Z)-5-(Methylsulfanyl)-4-penten-2-yn-1-yl]-2-furyl}acrylaldehyde	5.49734e-05	0.236897	NA	level4	ChemSpider	NA	NA	NA	NA	NA	NA	NA	NA	NA	Up	2.80624e+06	3.12539e+06	7.94093e+06	1.48266e+07	1.30798e+07	1.32295e+07	1.69534e+07	2.56041e+07	2.84975e+07	2.64279e+07	1.47295e+07	2.77467e+07
0.674_275.14768	0.392108	0.0229011	0.146031	1.15723	LL200+HS:L200	POS	0.674	275.148	C11 H21 N3 O5	epsilon-(gamma-Glutamyl)-lysine	-0.000440405	-1.60061	NA	level4	ChemSpider	NA	NA	NA	NA	NA	NA	NA	NA	NA	Down	2.21386e+07	3.03838e+07	1.72643e+07	7.20305e+06	9.02837e+06	1.14028e+07	6.88848e+06	5.31556e+06	9.24684e+06	9.05141e+06	1.56346e+06	6.13375e+06
0.675_260.13689	0.459857	0.00792219	0.110186	1.15721	LL200+HS:L200	POS	0.675	260.137	C11 H20 N2 O5	L-gamma-Glutamyl-L-leucine	-0.000328506	-1.26282	NA	level4	ChemSpider	NA	NA	NA	NA	NA	NA	NA	NA	NA	Down	5.42179e+07	4.67097e+07	5.44347e+07	2.26334e+07	2.41754e+07	3.09348e+07	2.77859e+07	1.09837e+07	2.68913e+07	1.06912e+07	1.37317e+07	1.71117e+07
0.676_218.09010	0.426884	0.010475	0.118983	1.24041	LL200+HS:L200	POS	0.676	218.09	C8 H14 N2 O5	MFCD00037215	-0.000175441	-0.804443	NA	level4	ChemSpider	NA	NA	NA	NA	NA	NA	NA	NA	NA	Down	6.07578e+06	1.01301e+07	8.79739e+06	3.6262e+06	4.51523e+06	7.04682e+06	2.01886e+06	3.64504e+06	1.6853e+06	3.51747e+06	5.18319e+06	1.10723e+06
0.676_261.08513	1.78505	0.0247211	0.150095	1.02274	LL200+HS:L200	POS	0.676	261.085	C10 H15 N O7	Hymexazol O-glucoside	0.000280436	1.07412	NA	level4	ChemSpider	NA	NA	NA	NA	NA	NA	NA	NA	NA	Up	8.47216e+06	1.37921e+07	1.44107e+07	3.00929e+07	2.81172e+07	2.66688e+07	3.33973e+07	3.31222e+07	4.84863e+07	2.41512e+07	4.39804e+07	3.38422e+07
0.677_258.12160	0.456331	0.0286159	0.156458	1.01253	LL200+HS:L200	POS	0.677	258.122	C11 H18 N2 O5	1-(4-Amino-4-carboxybutanoyl)-2-piperidinecarboxylic acid	2.41959e-05	0.0937385	NA	level4	ChemSpider	NA	NA	NA	NA	NA	NA	NA	NA	NA	Down	2.21386e+07	3.03838e+07	1.72643e+07	7.20305e+06	9.02837e+06	1.14373e+07	6.88848e+06	5.31556e+06	9.24684e+06	9.05141e+06	7.8359e+06	6.13375e+06
0.68_247.14185	3.71607	0.00870354	0.111935	1.77237	LL200+HS:L200	POS	0.68	247.142	C11 H21 N O5	3-hydroxybutyrylcarnitine	-0.000118035	-0.477599	NA	level4	ChemSpider	NA	NA	NA	NA	NA	NA	NA	NA	NA	Up	4.64635e+06	8.03248e+06	4.16226e+06	4.73247e+07	1.88785e+07	3.14595e+07	9.60664e+07	6.59199e+07	8.22003e+07	7.58412e+07	5.48534e+07	5.06235e+07
0.681_234.08480	0.419225	0.0183416	0.136225	1.13977	LL200+HS:L200	POS	0.681	234.085	C8 H14 N2 O6	glu-ser	-0.000387709	-1.65627	NA	level4	ChemSpider	NA	NA	NA	NA	NA	NA	NA	NA	NA	Down	8.23147e+06	1.31542e+07	9.21198e+06	3.05273e+06	4.35317e+06	5.97119e+06	1.08164e+06	2.67628e+06	3.87221e+06	3.1104e+06	4.87126e+06	2.82352e+06
0.689_426.08767	0.416023	0.0307676	0.15789	1.08669	LL200+HS:L200	POS	0.689	426.088	C13 H22 N4 O8 S2	Cysteine-glutathione disulfide	-0.000231574	-0.543489	NA	level4	ChemSpider	NA	NA	NA	NA	NA	NA	NA	NA	NA	Down	6.57328e+07	5.57239e+07	3.7921e+07	1.42739e+07	1.80427e+07	4.67396e+07	2.00667e+07	1.8092e+07	1.81221e+07	1.77158e+07	1.22919e+07	1.29056e+07
0.69_259.04586	1.72274	0.0218487	0.143797	1.0331	LL200+HS:L200	POS	0.69	259.046	C6 H14 N O8 P	D-Glucosamine 6-phosphate	0.000153172	0.591295	NA	level4	ChemSpider	NA	NA	NA	NA	NA	NA	NA	NA	NA	Up	9.68654e+06	1.15796e+07	1.98805e+07	2.1036e+07	3.10975e+07	2.83827e+07	3.36426e+07	3.792e+07	3.61955e+07	3.73905e+07	3.07486e+07	3.36962e+07
0.692_94.05306	0.179413	0.0184003	0.136225	1.45461	LL200+HS:L200	NEG	0.692	94.0531	C5 H6 N2	4-Aminopyridine	-4.09796e-05	-0.435707	NA	level4	ChemSpider	NA	NA	NA	NA	NA	NA	NA	NA	NA	Down	1.13134e+06	3.34067e+06	2.37124e+06	465261	352505	313983	163589	155994	412963	348947	190989	158335
0.693_169.07422	0.353443	0.0216256	0.143556	1.24016	LL200+HS:L200	POS	0.693	169.074	C8 H11 N O3	noradrenaline	0.000322841	1.90946	NA	level4	ChemSpider	NA	NA	NA	NA	NA	NA	NA	NA	NA	Down	3.01628e+07	9.07903e+06	4.26149e+07	7.20565e+06	1.5867e+07	1.53983e+07	4.16401e+06	1.0213e+07	6.21221e+06	5.66666e+06	1.09044e+07	5.36868e+06
0.693_351.11848	3.35222	0.000307761	0.0201895	1.67665	LL200+HS:L200	NEG	0.693	351.118	C12 H22 N3 O7 P	N-Acetyldemethylphosphinothricin tripeptide	-0.00105368	-3.0009	NA	level4	ChemSpider	NA	NA	NA	NA	NA	NA	NA	NA	NA	Up	1.46724e+06	1.82651e+06	1.81652e+06	2.71693e+06	927007	1.20942e+06	6.13601e+06	5.73497e+06	5.52865e+06	5.65708e+06	5.48321e+06	4.8604e+06
0.694_199.08434	0.101376	0.00601575	0.104104	1.91749	LL200+HS:L200	POS	0.694	199.084	C9 H13 N O4	N-3-oxo-pentanoyl-L-Homoserine lactone	-0.000117468	-0.590041	NA	level4	ChemSpider	NA	NA	NA	NA	NA	NA	NA	NA	NA	Down	1.31645e+07	1.67186e+07	1.9825e+07	1.42434e+06	3.41475e+06	4.45134e+06	1.12457e+06	855324	869173	941505	1.28675e+06	903720
0.695_172.08470	0.413966	0.00779776	0.109924	1.17349	LL200+HS:L200	NEG	0.695	172.085	C7 H12 N2 O3	MFCD03547962	-9.1794e-05	-0.533423	NA	level4	ChemSpider	NA	NA	NA	NA	NA	NA	NA	NA	NA	Down	3.88213e+06	5.81244e+06	5.88412e+06	1.98888e+06	2.22791e+06	2.3954e+06	1.44852e+06	940912	1.90828e+06	1.68297e+06	1.83335e+06	1.37224e+06
0.696_204.11076	0.133497	0.0487206	0.182447	1.42527	LL200+HS:L200	POS	0.696	204.111	C8 H16 N2 O4	Val-Ser	-0.000251696	-1.23313	NA	level4	ChemSpider	NA	NA	NA	NA	NA	NA	NA	NA	NA	Down	1.15567e+07	1.94753e+07	1.02808e+07	775157	2.1284e+06	1.22852e+06	1.20708e+06	752992	1.31041e+06	1.01059e+06	815655	970029
0.697_169.08478	2.24007	0.00101706	0.0418372	1.30619	LL200+HS:L200	NEG	0.697	169.085	C7 H11 N3 O2	N.pi.-Methyl-L-histidine	-0.000343763	-2.03307	NA	level4	ChemSpider	NA	NA	NA	NA	NA	NA	NA	NA	NA	Up	926035	2.0191e+06	1.77922e+06	883688	1.40327e+06	1.23615e+06	2.96376e+06	2.53998e+06	3.89737e+06	4.1256e+06	1.96381e+06	2.98438e+06
0.698_198.13687	0.43143	0.00451015	0.0941521	1.21183	LL200+HS:L200	POS	0.698	198.137	C10 H18 N2 O2	(1S,6S)-6-Aminooctahydro-1-indolizinyl acetate	4.07956e-05	0.205896	NA	level4	ChemSpider	NA	NA	NA	NA	NA	NA	NA	NA	NA	Down	1.29418e+06	2.00177e+06	1.91373e+06	643608	1.10047e+06	1.31584e+06	755567	542684	561301	555956	620130	532112
0.698_246.12130	0.0956822	0.018108	0.136224	1.71946	LL200+HS:L200	NEG	0.698	246.121	C10 H18 N2 O5	asp-leu	-0.000270094	-1.0974	NA	level4	ChemSpider	NA	NA	NA	NA	NA	NA	NA	NA	NA	Down	1.12281e+07	2.11354e+07	8.98745e+06	931281	1.12188e+06	1.77356e+06	693357	230189	989159	827395	1.15125e+06	431351
0.698_254.09992	0.286162	0.00713169	0.107794	1.42649	LL200+HS:L200	NEG	0.698	254.1	C9 H18 O8	3-O-beta-D-galactosyl-sn-glycerol	-0.00024706	-0.972294	NA	level4	ChemSpider	NA	NA	NA	NA	NA	NA	NA	NA	NA	Down	2.61988e+06	1.03789e+06	3.47817e+06	754851	1.04332e+06	774100	168379	583104	344022	640291	597487	444840
0.698_280.07264	2.97842	0.0043	0.091633	1.56825	LL200+HS:L200	NEG	0.698	280.073	C9 H16 N2 O6 S	gamma-Glutamyl-3-(methylsulfinyl)alanine	-0.0002647	-0.945112	NA	level4	ChemSpider	NA	NA	NA	NA	NA	NA	NA	NA	NA	Up	129640	190894	178340	418000	376103	731612	940147	890402	1.30681e+06	1.14973e+06	829901	913082
0.699_229.07813	2.45569	0.0216852	0.143655	1.17643	LL200+HS:L200	POS	0.699	229.078	C10 H15 N O3 S	3-Oxo-N-[(3S)-2-oxotetrahydro-3-thiophenyl]hexanamide	0.000862862	3.76669	NA	level4	ChemSpider	NA	NA	NA	NA	NA	NA	NA	NA	NA	Up	233339	348550	310559	351455	535396	1.00914e+06	970891	2.48396e+06	1.38199e+06	782570	433271	794861
0.7_159.12592	2.71426	0.0295584	0.156593	1.68715	LL200+HS:L200	POS	0.7	159.126	C8 H17 N O2	Pregabalin	-9.56684e-06	-0.0601212	NA	level4	ChemSpider	NA	NA	NA	NA	NA	NA	NA	NA	NA	Up	3.64156e+06	2.69868e+07	1.26256e+07	2.26282e+08	3.68633e+07	5.29926e+07	2.64794e+08	1.24618e+08	1.39047e+08	1.14958e+08	1.47958e+08	1.84108e+08
0.701_157.10992	2.69638	0.0492753	0.182751	1.23041	LL200+HS:L200	POS	0.701	157.11	C8 H15 N O2	tranexamic acid	-0.00036346	-2.31341	NA	level4	ChemSpider	NA	NA	NA	NA	NA	NA	NA	NA	NA	Up	8.82616e+06	9.88697e+07	2.77938e+07	5.0765e+07	6.37244e+07	3.08071e+07	2.49348e+08	3.96516e+07	5.89169e+07	9.66598e+07	8.56598e+07	2.26871e+08
0.701_192.06086	2.46981	0.0350185	0.164322	1.46013	LL200+HS:L200	POS	0.701	192.061	C11 H12 O S	(2E)-2-(methylthiomethyl)-3-phenyl-2-propenal	-2.07471e-05	-0.108023	NA	level4	ChemSpider	NA	NA	NA	NA	NA	NA	NA	NA	NA	Up	315218	470857	419534	2.12554e+06	4.93596e+06	3.62057e+06	7.00571e+06	3.92786e+06	4.38577e+06	2.89472e+06	5.40014e+06	5.74614e+06
0.701_214.13135	0.174455	0.0136974	0.127937	1.5646	LL200+HS:L200	NEG	0.701	214.131	C10 H18 N2 O3	Desthiobiotin	-0.000388452	-1.81408	NA	level4	ChemSpider	NA	NA	NA	NA	NA	NA	NA	NA	NA	Down	9.05224e+06	1.46817e+07	9.19362e+06	1.68501e+06	1.48724e+06	2.17983e+06	1.87454e+06	309245	1.85345e+06	670018	958370	1.01248e+06
0.702_274.18947	7.00718	0.00529702	0.100543	1.87896	LL200+HS:L200	POS	0.702	274.189	C13 H26 N2 O4	tybamate	0.000213016	0.776895	NA	level4	ChemSpider	NA	NA	NA	NA	NA	NA	NA	NA	NA	Up	366024	546747	487152	2.66106e+06	3.44084e+06	551671	2.01526e+07	1.61007e+06	5.02577e+06	6.89782e+06	3.5697e+06	1.91763e+07
0.705_304.13846	2.1802	0.0177405	0.135354	1.22562	LL200+HS:L200	POS	0.705	304.138	C11 H20 N4 O6	Nopaline	0.000178411	0.586613	NA	level4	ChemSpider	NA	NA	NA	NA	NA	NA	NA	NA	NA	Up	293311	435693	390377	1.74387e+06	772461	907066	2.84533e+06	1.67319e+06	1.08236e+06	1.32716e+06	1.2392e+06	1.73691e+06
0.732_259.18915	0.0962452	0.0473695	0.180705	1.51907	LL200+HS:L200	POS	0.732	259.189	C12 H25 N3 O3	lys-leu	-0.000438611	-1.69224	NA	level4	ChemSpider	NA	NA	NA	NA	NA	NA	NA	NA	NA	Down	6.01203e+06	1.68103e+07	1.42788e+07	585183	622067	1.95978e+06	763657	583955	613776	614628	641795	657809
0.734_295.10556	2.33377	0.0358388	0.164704	1.12985	LL200+HS:L200	POS	0.734	295.106	C14 H17 N O6	Indican	-2.39182e-05	-0.0810498	NA	level4	ChemSpider	NA	NA	NA	NA	NA	NA	NA	NA	NA	Up	2.88783e+06	655013	3.6111e+06	863819	3.04479e+06	3.87307e+06	2.68568e+06	1.08664e+07	6.99322e+06	6.10749e+06	4.86706e+06	3.3365e+06
0.766_281.09328	3.59485	0.000482027	0.0268784	1.64807	LL200+HS:L200	POS	0.766	281.093	C12 H16 N3 O3 P	benzodepa	0.000348854	1.24106	NA	level4	ChemSpider	NA	NA	NA	NA	NA	NA	NA	NA	NA	Up	1.68677e+06	2.86593e+06	3.4238e+06	6.80194e+06	4.40036e+06	5.2204e+06	1.29033e+07	2.53863e+07	1.25749e+07	1.69429e+07	1.0925e+07	8.97919e+06
0.784_162.10826	2.60021	0.0115714	0.122637	1.35472	LL200+HS:L200	POS	0.784	162.108	C8 H18 O S	(S)-1-Methoxy-3-heptanethiol	0.000424386	2.61793	NA	level4	ChemSpider	NA	NA	NA	NA	NA	NA	NA	NA	NA	Up	3.4246e+06	8.78603e+06	5.25219e+06	1.64438e+07	1.59121e+07	1.68818e+07	4.06871e+07	2.42678e+07	4.9537e+07	1.97454e+07	2.00545e+07	1.91436e+07
0.882_470.17577	0.18962	0.014449	0.128229	1.49719	LL200+HS:L200	POS	0.882	470.176	C17 H30 N2 O13	O-[2-(Acetylamino)-2-deoxy-3-O-Î²-D-galactopyranosyl-Î²-D-galactopyranosyl]-L-serine	0.000976692	2.0773	NA	level4	ChemSpider	NA	NA	NA	NA	NA	NA	NA	NA	NA	Down	1.15538e+07	2.1929e+07	9.86954e+06	2.42172e+06	2.57111e+06	2.72621e+06	1.0273e+06	1.1433e+06	2.68989e+06	1.59332e+06	2.28576e+06	944543
0.887_188.11609	0.211576	0.0425218	0.173227	1.28482	LL200+HS:L200	NEG	0.887	188.116	C8 H16 N2 O3	Gly-Leu	1.09412e-06	0.0058162	NA	level4	ChemSpider	NA	NA	NA	NA	NA	NA	NA	NA	NA	Down	6.31768e+06	1.55236e+07	6.98147e+06	1.23192e+06	1.41822e+06	1.88262e+06	1.35445e+06	1.15046e+06	1.32161e+06	1.06312e+06	1.30834e+06	859255
0.922_79.04199	1.80758	0.0249785	0.150095	1.07518	LL200+HS:L200	POS	0.922	79.042	C5 H5 N	Pyridine	-0.000208281	-2.63506	NA	level4	ChemSpider	NA	NA	NA	NA	NA	NA	NA	NA	NA	Up	1.40888e+06	1.30402e+06	2.3733e+06	4.45245e+06	4.15471e+06	3.75567e+06	4.61335e+06	5.76913e+06	5.91543e+06	5.67867e+06	4.68354e+06	4.88034e+06
0.94_174.06349	0.415541	0.00706593	0.107782	1.23471	LL200+HS:L200	POS	0.94	174.063	C6 H10 N2 O4	Formiminoglutamic Acid	-0.000563066	-3.23482	NA	level4	ChemSpider	NA	NA	NA	NA	NA	NA	NA	NA	NA	Down	3.55814e+07	6.13877e+07	5.51731e+07	2.69091e+07	2.9673e+07	2.49781e+07	1.67154e+07	2.28713e+07	3.00201e+07	9.25432e+06	7.60016e+06	1.06516e+07
0.981_174.10029	0.304315	0.0120216	0.124379	1.33251	LL200+HS:L200	POS	0.981	174.1	C7 H14 N2 O3	L-Theanine	-0.000154934	-0.889909	NA	level4	ChemSpider	NA	NA	NA	NA	NA	NA	NA	NA	NA	Down	2.73718e+07	4.8216e+07	3.96756e+07	1.09885e+07	9.49031e+06	1.78904e+07	7.86847e+06	9.63921e+06	6.82722e+06	7.07636e+06	9.17411e+06	6.16735e+06
1.127_351.10946	18.8346	4.13304e-05	0.00406699	2.65991	LL200+HS:L200	POS	1.127	351.109	C12 H21 N3 O7 S	S-(2-Hydroxyethyl)glutathione	-0.000560906	-1.59752	NA	level4	ChemSpider	NA	NA	NA	NA	NA	NA	NA	NA	NA	Up	316984	820227	562869	146289	146324	143471	8.84634e+06	3.43457e+06	6.865e+06	8.54995e+06	6.24778e+06	6.29019e+06
1.144_207.05653	0.305973	0.0173058	0.134858	1.49025	LL200+HS:L200	POS	1.144	207.057	C7 H13 N O4 S	2-Acrylamido-2-methyl-1-propane sulfonic acid	2.91184e-06	0.014063	NA	level4	ChemSpider	NA	NA	NA	NA	NA	NA	NA	NA	NA	Down	3.42351e+07	2.84292e+07	1.2906e+07	6.89575e+06	1.37194e+07	1.74544e+07	5.08953e+06	934254	1.13096e+07	5.44902e+06	9.9204e+06	2.0679e+06
1.31_232.14234	0.0837801	0.0027259	0.0732429	2.04521	LL200+HS:L200	POS	1.31	232.142	C10 H20 N2 O4	mebutamate	3.75299e-05	0.161668	NA	level4	ChemSpider	NA	NA	NA	NA	NA	NA	NA	NA	NA	Down	2.58127e+07	5.38958e+07	4.72751e+07	2.92606e+06	9.35351e+06	1.19535e+07	2.07017e+06	1.47047e+06	3.26951e+06	555587	3.70337e+06	1.59983e+06
1.338_247.10554	0.513583	0.0127424	0.125388	1.02833	LL200+HS:L200	POS	1.338	247.106	C10 H17 N O6	Linamarin	-5.02675e-05	-0.203425	NA	level4	ChemSpider	NA	NA	NA	NA	NA	NA	NA	NA	NA	Down	5.89217e+07	5.35373e+07	2.70416e+07	3.79292e+07	2.04994e+07	3.75667e+07	3.33846e+07	1.3915e+07	2.31228e+07	1.7917e+07	1.33363e+07	1.92709e+07
1.497_212.11615	0.492082	0.00259309	0.0729047	1.10474	LL200+HS:L200	POS	1.497	212.116	C10 H16 N2 O3	Butabarbital	5.98411e-05	0.282115	NA	level4	ChemSpider	NA	NA	NA	NA	NA	NA	NA	NA	NA	Down	6.50252e+07	1.31062e+08	1.43509e+08	1.05677e+08	8.08171e+07	7.84555e+07	5.08233e+07	2.8277e+07	4.49726e+07	6.46109e+07	6.2049e+07	4.67538e+07
1.62_446.19573	0.266747	0.00489701	0.097194	1.47012	LL200+HS:L200	POS	1.62	446.196	C24 H30 O8	Estrone glucuronide	0.00166362	3.72848	NA	level4	ChemSpider	NA	NA	NA	NA	NA	NA	NA	NA	NA	Down	2.13432e+07	2.18184e+07	1.85296e+07	6.11339e+06	5.75837e+06	7.00812e+06	2.84514e+06	3.85482e+06	3.79144e+06	5.29275e+06	3.50286e+06	2.20507e+06
1.947_117.91441	426.372	9.92866e-06	0.00129421	3.84356	LL200+HS:L200	NEG	1.947	117.914	C H Cl3	Chloroform	2.87604e-05	0.24391	NA	level4	ChemSpider	NA	NA	NA	NA	NA	NA	NA	NA	NA	Up	34139.9	88179	92363.4	284537	180763	518372	8.38236e+07	6.02109e+07	8.59335e+07	1.05115e+08	8.24231e+07	9.34387e+07
1.947_161.90423	520.356	1.17369e-05	0.00143663	3.91228	LL200+HS:L200	NEG	1.947	161.904	C2 H Cl3 O2	Trichloroacetic acid	1.8283e-05	0.112925	NA	level4	ChemSpider	NA	NA	NA	NA	NA	NA	NA	NA	NA	Up	11639.8	22059.1	31349.2	108926	61995.4	186429	3.40421e+07	2.57112e+07	3.66397e+07	4.66449e+07	3.59727e+07	4.0787e+07
10.002_446.37602	2.96453	0.013887	0.127961	1.5052	LL200+HS:L200	POS	10.002	446.376	C29 H50 O3	2-(3-Hydroxy-3,7,11,15-tetramethylhexadecyl)-3,5,6-trimethyl-1,4-benzoquinone	2.8845e-05	0.0646203	NA	level4	ChemSpider	NA	NA	NA	NA	NA	NA	NA	NA	NA	Up	1.61761e+06	753935	755800	6.14494e+06	1.81286e+06	6.04525e+06	4.66931e+06	1.43576e+07	5.95516e+06	1.07692e+07	6.89496e+06	8.13728e+06
10.007_476.38671	0.388383	0.0188687	0.137533	1.38708	LL200+HS:L200	POS	10.007	476.387	C30 H52 O4	sarcoaldesterol A	0.000152398	0.319903	NA	level4	ChemSpider	NA	NA	NA	NA	NA	NA	NA	NA	NA	Down	1.27529e+06	861687	1.52258e+06	887597	994052	2.06325e+06	143732	682921	140456	925372	293310	767652
10.009_516.37934	0.341289	0.00662303	0.105112	1.36517	LL200+HS:L200	POS	10.009	516.379	C32 H52 O5	(3beta,5beta,6beta,11alpha,12beta)-3,11-Dihydroxy-5,6-epoxygorgostan-12-yl acetate	-0.00212976	-4.12438	NA	level4	ChemSpider	NA	NA	NA	NA	NA	NA	NA	NA	NA	Down	423062	531527	1.44583e+06	629574	638644	1.48846e+06	141329	319285	138108	661992	204421	294927
10.082_214.13586	0.136301	0.0437156	0.174562	1.46864	LL200+HS:L200	POS	10.082	214.136	C15 H18 O	(9S)-1,5,9-Trimethyl-6,7,8,9-tetrahydronaphtho[2,1-b]furan	9.46587e-05	0.44205	NA	level4	ChemSpider	NA	NA	NA	NA	NA	NA	NA	NA	NA	Down	2.48508e+06	602253	1.15337e+06	117443	150544	148023	89537	98182.4	151181	69594.7	140905	85315.3
10.083_240.15145	0.182495	0.00877361	0.111935	1.64259	LL200+HS:L200	POS	10.083	240.151	C17 H20 O	Dehydrofalcarinone	3.31909e-05	0.138208	NA	level4	ChemSpider	NA	NA	NA	NA	NA	NA	NA	NA	NA	Down	4.48889e+06	1.29712e+06	2.154e+06	443867	633522	511063	161817	135895	196813	437589	632036	174741
10.085_373.29790	0.0299282	0.0322634	0.159772	2.0014	LL200+HS:L200	POS	10.085	373.298	C24 H39 N O2	(5Z,8Z,11Z,14Z)-1-(4-Morpholinyl)-5,8,11,14-icosatetraen-1-one	-0.000181923	-0.48734	NA	level4	ChemSpider	NA	NA	NA	NA	NA	NA	NA	NA	NA	Down	3.35487e+08	9.02577e+07	1.4814e+08	1.2169e+06	1.28428e+07	1.07932e+07	6.57501e+06	2.96127e+06	1.94476e+06	1.21718e+06	3.5465e+06	1.6744e+06
10.16_326.28202	2.57754	0.0201212	0.139566	1.21233	LL200+HS:L200	POS	10.16	326.282	C20 H38 O3	MFCD00045988	-7.36018e-05	-0.225577	NA	level4	ChemSpider	NA	NA	NA	NA	NA	NA	NA	NA	NA	Up	489614	189211	127774	657906	176452	355162	743984	1.94598e+06	890453	621110	348478	595071
10.182_370.28699	0.275309	0.023109	0.146615	1.52681	LL200+HS:L200	POS	10.182	370.287	C25 H38 O2	5-[(8Z,11Z,14Z)-8,11,14-Nonadecatrien-1-yl]-1,3-benzenediol	-0.000187837	-0.507273	NA	level4	ChemSpider	NA	NA	NA	NA	NA	NA	NA	NA	NA	Down	449041	1.15761e+06	4.29501e+06	705059	2.53793e+06	2.03621e+06	76781.3	155355	183660	463610	1.71076e+06	488019
10.189_238.19323	0.0564493	0.0381918	0.166399	1.76617	LL200+HS:L200	POS	10.189	238.193	C15 H26 O2	Geranyl isovalerate	-5.49654e-05	-0.23076	NA	level4	ChemSpider	NA	NA	NA	NA	NA	NA	NA	NA	NA	Down	1.16034e+07	1.7669e+06	5.55289e+06	119834	509568	456058	208348	156540	141871	189948	338753	94015.7
10.189_308.27139	0.0196389	0.0402632	0.169401	2.0257	LL200+HS:L200	POS	10.189	308.271	C20 H36 O2	Ethyl Linoleate	-0.000136215	-0.441868	NA	level4	ChemSpider	NA	NA	NA	NA	NA	NA	NA	NA	NA	Down	1.34142e+09	1.66008e+08	6.26199e+08	2.68351e+06	3.44755e+07	2.29611e+07	1.08214e+07	8.04176e+06	3.39271e+06	3.29205e+06	1.27812e+07	4.75368e+06
10.195_340.19111	1.8559	0.00809009	0.110707	1.10492	LL200+HS:L200	POS	10.195	340.191	C19 H24 N4 O2	pentamidine	0.00118779	3.49154	NA	level4	ChemSpider	NA	NA	NA	NA	NA	NA	NA	NA	NA	Up	1.20422e+06	3.10038e+06	1.76547e+06	3.11812e+06	2.91071e+06	3.08941e+06	5.30188e+06	3.75348e+06	6.0967e+06	3.67602e+06	5.23534e+06	4.12453e+06
10.195_387.31355	0.353389	0.0474426	0.180714	1.26759	LL200+HS:L200	POS	10.195	387.314	C25 H41 N O2	1,1'-(3,5-Pyridinediyl)di(1-decanone)	-0.000174761	-0.451213	NA	level4	ChemSpider	NA	NA	NA	NA	NA	NA	NA	NA	NA	Down	413997	1.01547e+06	3.52077e+06	644320	1.96097e+06	2.31849e+06	152254	331500	133303	571072	1.67736e+06	623883
10.297_430.34476	0.0489318	0.0376679	0.166006	1.73722	LL200+HS:L200	POS	10.297	430.345	C28 H46 O3	(22R,23R,24S)-22,23-Dihydroxyergost-4-en-3-one	6.40534e-05	0.148842	NA	level4	ChemSpider	NA	NA	NA	NA	NA	NA	NA	NA	NA	Down	1.72411e+06	5.36501e+06	2.03568e+06	154663	182114	66303.4	80830	60513.5	79773.5	67020.1	107375	70704.4
10.352_406.34473	0.0514897	0.00668995	0.105803	2.13936	LL200+HS:L200	POS	10.352	406.345	C26 H46 O3	3,4-Dimethyl-5-pentyl-2-furanpentadecanoic acid	3.55191e-05	0.0874113	NA	level4	ChemSpider	NA	NA	NA	NA	NA	NA	NA	NA	NA	Down	8.35561e+06	9.28044e+06	6.5569e+06	528580	634693	424638	61274.9	99130.9	54736.6	342518	574048	195741
10.405_360.30279	0.0149632	0.0428387	0.173744	2.05396	LL200+HS:L200	POS	10.405	360.303	C24 H40 O2	5beta-cholanoic acid	-4.02025e-05	-0.11158	NA	level4	ChemSpider	NA	NA	NA	NA	NA	NA	NA	NA	NA	Down	8.82159e+07	8.48675e+06	2.11338e+07	112588	697543	1.007e+06	828970	168565	213156	76294.6	371574	131834
10.437_364.33427	1.95554	0.0114017	0.121485	1.16298	LL200+HS:L200	NEG	10.437	364.334	C24 H44 O2	(5E,9E)-5,9-Tetracosadienoic acid	0.00014196	0.389641	NA	level4	ChemSpider	NA	NA	NA	NA	NA	NA	NA	NA	NA	Up	427079	526563	311400	824995	776940	1.19638e+06	1.37118e+06	1.28979e+06	1.34117e+06	1.55919e+06	1.33807e+06	1.04667e+06
10.461_547.28945	3.32484	0.0307644	0.15789	1.84855	LL200+HS:L200	POS	10.461	547.289	C26 H46 N O9 P	O-(Hydroxy{(2R)-2-hydroxy-3-[(8Z,11Z,14Z)-8,11,14-icosatrienoyloxy]propoxy}phosphoryl)-L-serine	-0.0015731	-2.87433	NA	level4	ChemSpider	NA	NA	NA	NA	NA	NA	NA	NA	NA	Up	200396	145958	134425	4.04261e+06	4.56128e+06	3.50808e+06	8.48478e+06	6.07538e+06	7.56486e+06	6.63602e+06	5.83481e+06	7.27304e+06
10.464_348.30266	0.147156	0.00533304	0.100648	1.87233	LL200+HS:L200	POS	10.464	348.303	C23 H40 O2	2287460	-0.000173586	-0.498376	NA	level4	ChemSpider	NA	NA	NA	NA	NA	NA	NA	NA	NA	Down	4.63368e+06	1.49248e+06	743701	391402	417508	692725	64014.2	84482.8	58927.2	231143	650395	142957
10.515_525.30726	2.51193	0.0365115	0.164963	1.45634	LL200+HS:L200	POS	10.515	525.307	C24 H48 N O9 P	lysophosphatidylserine	0.000595471	1.13357	NA	level4	ChemSpider	NA	NA	NA	NA	NA	NA	NA	NA	NA	Up	2.38663e+06	1.01159e+06	2.98647e+06	1.65965e+07	1.6236e+07	1.54765e+07	2.76324e+07	2.00405e+07	2.46499e+07	2.26584e+07	1.86377e+07	2.37678e+07
10.535_336.30283	0.0146125	0.0271056	0.153487	2.14503	LL200+HS:L200	POS	10.535	336.303	C22 H40 O2	13Z,16Z-docosadienoic acid	-2.53724e-06	-0.00754452	NA	level4	ChemSpider	NA	NA	NA	NA	NA	NA	NA	NA	NA	Down	2.43365e+07	2.27688e+06	5.26138e+06	104245	138662	432239	69962.1	51986.9	61564.7	75888.5	154260	61975
10.557_374.31856	0.129234	0.0454092	0.177335	1.43548	LL200+HS:L200	POS	10.557	374.319	C25 H42 O2	19-Phenylnonadecanoic acid	7.61899e-05	0.203543	NA	level4	ChemSpider	NA	NA	NA	NA	NA	NA	NA	NA	NA	Down	1.37704e+06	1.67219e+06	293318	160902	102308	92044.5	85521.9	72426	83347.9	74211.2	77661.7	84711.5
10.559_382.34472	0.0498017	0.0116008	0.122695	2.0432	LL200+HS:L200	POS	10.559	382.345	C24 H46 O3	3-Oxotetracosanoic acid	2.10341e-05	0.0550135	NA	level4	ChemSpider	NA	NA	NA	NA	NA	NA	NA	NA	NA	Down	3.40572e+06	2.47469e+06	3.21293e+06	183011	256362	157186	62232	59123.4	60650.1	75389.1	165779	59399.6
10.622_408.36054	0.0322946	0.00518507	0.0991286	2.30548	LL200+HS:L200	POS	10.622	408.361	C26 H48 O3	(11E)-2-Heptyl-10-oxo-11-nonadecenoic acid	0.000190607	0.466762	NA	level4	ChemSpider	NA	NA	NA	NA	NA	NA	NA	NA	NA	Down	6.77969e+06	2.78924e+06	6.3573e+06	285375	487891	316430	69939	58431.9	72822.9	90807.2	188106	69416.4
10.685_568.37741	0.311735	0.0172913	0.134858	1.27432	LL200+HS:L200	POS	10.685	568.377	C35 H52 O6	3-(2-Hydroperoxy-2-propanyl)-8-isobutyryl-9-methyl-6,10-bis(3-methyl-2-buten-1-yl)-9-(4-methyl-3-penten-1-yl)-4-oxatricyclo[6.3.1.0~1,5~]dodec-5-ene-7,12-dione	0.00101616	1.78783	NA	level4	ChemSpider	NA	NA	NA	NA	NA	NA	NA	NA	NA	Down	7.02234e+06	9.93997e+06	1.42444e+07	7.59593e+06	3.9287e+06	1.76988e+06	3.16222e+06	3.72702e+06	1.8453e+06	1.61723e+06	2.15154e+06	1.36926e+06
10.823_834.52871	2.17471	0.0492116	0.182737	1.39751	LL200+HS:L200	NEG	10.823	834.529	C43 H79 O13 P	(2R)-1-[(Hydroxy{[(2R,3R,5S,6R)-2,3,4,5,6-pentahydroxycyclohexyl]oxy}phosphoryl)oxy]-3-(palmitoyloxy)-2-propanyl (9Z,12Z)-9,12-octadecadienoate	0.00288629	3.4586	NA	level4	ChemSpider	NA	NA	NA	NA	NA	NA	NA	NA	NA	Up	694255	746712	1.04503e+06	8.82952e+06	9.27731e+06	6.11352e+06	1.02905e+07	8.2752e+06	8.5561e+06	1.0183e+07	1.11085e+07	9.66537e+06
10.969_688.55219	3.0706	0.0183443	0.136225	1.57664	LL200+HS:L200	POS	10.969	688.552	C38 H77 N2 O6 P	2-Aminoethyl (2S,3R,4E)-2-(docosanoylamino)-3-hydroxy-4-tetradecen-1-yl hydrogen phosphate	0.000268054	0.389302	NA	level4	ChemSpider	NA	NA	NA	NA	NA	NA	NA	NA	NA	Up	498531	263305	513762	2.45812e+06	2.71422e+06	3.51423e+06	7.40418e+06	4.47586e+06	4.38637e+06	3.51683e+06	5.3323e+06	5.47433e+06
10.984_382.32367	2.95653	0.000393344	0.0236407	1.44497	LL200+HS:L200	POS	10.984	382.324	C27 H42 O	4,6-CHOLESTADIEN-3-ONE	0.000101266	0.264871	NA	level4	ChemSpider	NA	NA	NA	NA	NA	NA	NA	NA	NA	Up	1.41147e+06	904941	1.55288e+06	1.43982e+06	2.77323e+06	1.50507e+06	8.45929e+06	3.05807e+06	3.30218e+06	4.21259e+06	4.6662e+06	4.64712e+06
11.004_749.49999	2.30508	0.014692	0.129012	1.20317	LL200+HS:L200	POS	11.004	749.5	C42 H72 N O8 P	(2R)-2-[(5Z,8Z,11Z,14Z,17Z)-5,8,11,14,17-Icosapentaenoyloxy]-3-[(9Z)-9-tetradecenoyloxy]propyl 2-(trimethylammonio)ethyl phosphate	0.000432094	0.576509	NA	level4	ChemSpider	NA	NA	NA	NA	NA	NA	NA	NA	NA	Up	341212	604795	274985	860926	934460	1.21799e+06	3.31025e+06	1.3032e+06	1.56649e+06	1.07083e+06	1.17593e+06	1.33384e+06
11.032_827.54460	1.64196	0.00658898	0.105002	1.01805	LL200+HS:L200	POS	11.032	827.545	C48 H78 N O8 P	(2R)-2-[(4Z,7Z,10Z,13Z,16Z,19Z)-4,7,10,13,16,19-Docosahexaenoyloxy]-3-[(6Z,9Z,12Z)-6,9,12-octadecatrienoyloxy]propyl 2-(trimethylammonio)ethyl phosphate	-0.00190075	-2.29685	NA	level4	ChemSpider	NA	NA	NA	NA	NA	NA	NA	NA	NA	Up	1.48751e+07	2.65044e+07	1.9931e+07	3.29412e+07	2.89738e+07	2.9294e+07	4.7362e+07	3.81029e+07	4.04821e+07	4.19627e+07	4.05251e+07	4.19955e+07
11.091_895.56179	3.33653	0.0145821	0.128612	1.59465	LL200+HS:L200	NEG	11.091	895.562	C48 H82 N O12 P	O-[Hydroxy(2-{[13-(3-methyl-5-pentyl-2-furyl)tridecanoyl]oxy}-3-{[11-(3-methyl-5-propyl-2-furyl)undecanoyl]oxy}propoxy)phosphoryl]serine	0.00432726	4.83192	NA	level4	ChemSpider	NA	NA	NA	NA	NA	NA	NA	NA	NA	Up	1.19689e+06	331588	290167	2.58077e+06	2.75644e+06	2.53061e+06	7.40827e+06	5.29551e+06	6.7095e+06	4.08816e+06	4.08257e+06	4.73515e+06
11.165_743.54691	2.03933	0.0247806	0.150095	1.17811	LL200+HS:L200	POS	11.165	743.547	C41 H78 N O8 P	Dioleoylphosphatidylethanolamine	0.000407329	0.547819	NA	level4	ChemSpider	NA	NA	NA	NA	NA	NA	NA	NA	NA	Up	1.36393e+07	1.51207e+07	1.03869e+07	3.80122e+07	4.15639e+07	5.39123e+07	7.62499e+07	4.75449e+07	5.06836e+07	5.02101e+07	7.19042e+07	5.54677e+07
11.168_426.38644	0.465188	0.00507113	0.0982604	1.18787	LL200+HS:L200	POS	11.168	426.386	C30 H50 O	1916451	0.000269006	0.630897	NA	level4	ChemSpider	NA	NA	NA	NA	NA	NA	NA	NA	NA	Down	745902	270340	302158	432582	429998	522611	101718	284693	185738	227352	202763	255415
11.184_748.52808	1.85503	0.0298089	0.156593	1.10374	LL200+HS:L200	NEG	11.184	748.528	C40 H77 O10 P	1-PALMITOYL-2-OLEOYL-SN-GLYCERO-3-(PHOSPHO-RAC-(1-GLYCEROL))	0.00264669	3.53587	NA	level4	ChemSpider	NA	NA	NA	NA	NA	NA	NA	NA	NA	Up	2.27243e+06	2.19773e+06	2.22029e+06	7.50012e+06	6.6221e+06	7.05394e+06	8.17005e+06	7.96918e+06	8.33039e+06	8.23125e+06	1.00022e+07	8.99047e+06
11.254_763.51522	1.80019	0.0193272	0.138217	1.06981	LL200+HS:L200	POS	11.254	763.515	C43 H74 N O8 P	1-hexadecanoyl-2-(4Z,7Z,10Z,13Z,16Z,19Z-docosahexaenoyl)-sn-glycero-3-phosphoethanolamine	1.59141e-05	0.0208433	NA	level4	ChemSpider	NA	NA	NA	NA	NA	NA	NA	NA	NA	Up	2.65899e+07	4.34634e+07	3.7516e+07	8.12011e+07	8.45414e+07	8.24736e+07	1.34797e+08	8.81063e+07	1.0513e+08	9.44506e+07	1.04646e+08	1.13353e+08
11.257_785.49742	1.82526	0.00502298	0.0982604	1.10995	LL200+HS:L200	POS	11.257	785.497	C45 H72 N O8 P	(6Z,9Z,12Z,21R)-27-Amino-24-hydroxy-24-oxido-18-oxo-19,23,25-trioxa-24lambda~5~-phosphaheptacosa-6,9,12-trien-21-yl (4Z,7Z,10Z,13Z,16Z,19Z)-4,7,10,13,16,19-docosahexaenoate	-0.00213138	-2.71341	NA	level4	ChemSpider	NA	NA	NA	NA	NA	NA	NA	NA	NA	Up	2.9707e+06	5.53361e+06	3.98123e+06	7.12722e+06	6.564e+06	6.90481e+06	1.254e+07	8.40479e+06	1.049e+07	8.79841e+06	9.37597e+06	1.07732e+07
11.315_803.54387	1.97134	0.00275825	0.0732429	1.14097	LL200+HS:L200	POS	11.315	803.544	C46 H78 N O8 P	(2R)-2-[(4Z,7Z,10Z,13Z,16Z,19Z)-4,7,10,13,16,19-Docosahexaenoyloxy]-3-[(9Z)-9-hexadecenoyloxy]propyl 2-(trimethylammonio)ethyl phosphate	-0.00263381	-3.27773	NA	level4	ChemSpider	NA	NA	NA	NA	NA	NA	NA	NA	NA	Up	3.06391e+07	4.28565e+07	4.34215e+07	3.06244e+07	2.66663e+07	2.54245e+07	8.73608e+07	6.05186e+07	7.58031e+07	6.49238e+07	3.43033e+07	7.06346e+07
11.376_761.49730	1.63153	0.00509263	0.0982909	1.00923	LL200+HS:L200	POS	11.376	761.497	C43 H72 N O8 P	(7Z,19R)-25-Amino-22-hydroxy-22-oxido-16-oxo-17,21,23-trioxa-22lambda~5~-phosphapentacos-7-en-19-yl (4Z,7Z,10Z,13Z,16Z,19Z)-4,7,10,13,16,19-docosahexaenoate	-0.00225345	-2.95923	NA	level4	ChemSpider	NA	NA	NA	NA	NA	NA	NA	NA	NA	Up	1.28533e+06	2.5474e+06	2.43434e+06	2.64921e+06	2.63164e+06	1.9199e+06	4.13622e+06	3.01227e+06	4.15047e+06	3.62089e+06	3.18806e+06	3.86528e+06
11.449_784.52361	2.14538	0.00436266	0.0927713	1.21727	LL200+HS:L200	POS	11.449	784.524	C43 H77 O10 P	(20R)-23,26,27-Trihydroxy-23-oxido-17-oxo-18,22,24-trioxa-23lambda~5~-phosphaheptacosan-20-yl (5Z,8Z,11Z,14Z)-5,8,11,14-icosatetraenoate	-0.00182765	-2.32963	NA	level4	ChemSpider	NA	NA	NA	NA	NA	NA	NA	NA	NA	Up	945680	1.52527e+06	1.06366e+06	2.27939e+06	2.51045e+06	2.03652e+06	4.60645e+06	3.02956e+06	4.83517e+06	3.92998e+06	2.01881e+06	3.80818e+06
11.483_715.51840	2.08273	0.0258843	0.151135	1.22003	LL200+HS:L200	NEG	11.483	715.518	C39 H74 N O8 P	1-Palmitoyl-2-linoleoyl PE	0.00319952	4.47163	NA	level4	ChemSpider	NA	NA	NA	NA	NA	NA	NA	NA	NA	Up	1.11967e+07	1.20032e+07	1.32277e+07	3.89658e+07	4.96417e+07	5.06091e+07	5.54642e+07	5.02095e+07	5.49364e+07	5.941e+07	7.91984e+07	6.66014e+07
11.483_803.57141	1.92725	0.0322332	0.159765	1.13762	LL200+HS:L200	NEG	11.483	803.571	C43 H82 N O10 P	O-{[(2R)-2-[(13Z)-13-Docosenoyloxy]-3-(pentadecanoyloxy)propoxy](hydroxy)phosphoryl}-L-serine	0.00377331	4.6957	NA	level4	ChemSpider	NA	NA	NA	NA	NA	NA	NA	NA	NA	Up	5.28355e+07	4.25848e+07	4.40011e+07	1.38043e+08	1.70184e+08	1.94153e+08	2.04675e+08	1.76332e+08	1.86364e+08	2.09503e+08	2.48564e+08	2.11477e+08
11.505_716.58367	2.84949	0.00617534	0.104113	1.44663	LL200+HS:L200	POS	11.505	716.584	C40 H81 N2 O6 P	C17 Sphingomyelin (d18:1/17:0)	0.000441223	0.615731	NA	level4	ChemSpider	NA	NA	NA	NA	NA	NA	NA	NA	NA	Up	356145	265529	392203	1.23473e+06	968481	1.18439e+06	3.58864e+06	1.69744e+06	1.98617e+06	1.42664e+06	1.97583e+06	1.86723e+06
11.521_741.53154	1.95188	0.0170515	0.134302	1.10743	LL200+HS:L200	POS	11.521	741.532	C41 H76 N O8 P	1-oleoyl-2-linoleyl-sn-glycero-3-phosphoethanolamine	0.000689431	0.92974	NA	level4	ChemSpider	NA	NA	NA	NA	NA	NA	NA	NA	NA	Up	5.44458e+06	7.31949e+06	3.92532e+06	1.51632e+07	1.15298e+07	1.37305e+07	1.92006e+07	1.44549e+07	1.4745e+07	1.56236e+07	2.65029e+07	2.09503e+07
11.53_719.54919	1.95188	0.0170515	0.134302	1.10743	LL200+HS:L200	POS	11.53	719.549	C39 H78 N O8 P	MFCD00042876	0.00268826	3.73605	NA	level4	ChemSpider	NA	NA	NA	NA	NA	NA	NA	NA	NA	Up	5.44458e+06	7.31949e+06	3.92532e+06	1.51632e+07	1.15298e+07	1.37305e+07	1.92006e+07	1.44549e+07	1.4745e+07	1.56236e+07	2.65029e+07	2.09503e+07
11.582_787.54927	2.24933	0.00196559	0.0632328	1.3204	LL200+HS:L200	POS	11.582	787.549	C46 H78 N O7 P	(2R)-3-{[6-(Tetracyclo[6.4.0.0~2,7~.0~3,6~]dodec-10-yl)hexanoyl]oxy}-2-{[8-(tetracyclo[6.4.0.0~2,7~.0~3,6~]dodec-10-yl)octyl]oxy}propyl 2-(trimethylammonio)ethyl phosphate	-0.00232336	-2.9501	NA	level4	ChemSpider	NA	NA	NA	NA	NA	NA	NA	NA	NA	Up	2.0842e+06	2.91608e+06	1.53068e+06	4.14794e+06	2.38274e+06	4.11014e+06	5.00157e+06	6.18292e+06	6.73311e+06	7.7291e+06	6.8559e+06	6.12245e+06
11.583_765.56679	2.09176	0.00999952	0.117657	1.18713	LL200+HS:L200	POS	11.583	765.567	C44 H80 N O7 P	Eicosapentaenoyl PAF C-16	-0.000455045	-0.594389	NA	level4	ChemSpider	NA	NA	NA	NA	NA	NA	NA	NA	NA	Up	1.19961e+07	1.28326e+07	9.90573e+06	3.02041e+07	2.4056e+07	3.36729e+07	3.02273e+07	4.07185e+07	3.55298e+07	5.16851e+07	5.89744e+07	3.9456e+07
11.606_723.52082	2.16271	0.00429601	0.091633	1.23887	LL200+HS:L200	POS	11.606	723.521	C41 H74 N O7 P	1-(1Z-hexadecenyl)-2-arachidonoyl-sn-glycero-3-phosphoethanolamine	0.000530356	0.733022	NA	level4	ChemSpider	NA	NA	NA	NA	NA	NA	NA	NA	NA	Up	3.73343e+06	5.60647e+06	4.21539e+06	8.56972e+06	8.96563e+06	1.12908e+07	1.24379e+07	1.29327e+07	1.20311e+07	1.66227e+07	2.11566e+07	1.64775e+07
11.657_585.53398	1.86999	0.00118521	0.0466507	1.12018	LL200+HS:L200	NEG	11.657	585.534	C35 H71 N O5	2-Hydroxy-N-[(2S,3S,4R)-1,3,4-trihydroxy-2-octadecanyl]heptadecanamide	0.000753777	1.28733	NA	level4	ChemSpider	NA	NA	NA	NA	NA	NA	NA	NA	NA	Up	760088	1.33535e+06	980238	1.26425e+06	859064	1.08355e+06	1.35212e+06	1.44339e+06	2.52802e+06	2.03934e+06	2.05528e+06	2.33013e+06
11.669_791.58340	1.95973	0.0147962	0.129012	1.1621	LL200+HS:L200	POS	11.669	791.583	C46 H82 N O7 P	Docosahexaenoyl PAF C-16	0.000509533	0.643689	NA	level4	ChemSpider	NA	NA	NA	NA	NA	NA	NA	NA	NA	Up	2.1783e+06	3.46258e+06	2.69031e+06	7.76057e+06	6.52574e+06	6.4939e+06	9.53123e+06	7.48664e+06	1.06163e+07	9.85934e+06	1.15738e+07	7.98327e+06
11.671_792.58653	1.95434	0.0164502	0.133086	1.14634	LL200+HS:L200	POS	11.671	792.587	C43 H85 O10 P	(15R,21S)-18,21,22-Trihydroxy-3-methyl-18-oxido-12-oxo-13,17,19-trioxa-18lambda~5~-phosphadocosan-15-yl 22-methyltricosanoate	-0.00150436	-1.89804	NA	level4	ChemSpider	NA	NA	NA	NA	NA	NA	NA	NA	NA	Up	1.08092e+06	1.49841e+06	1.46083e+06	4.25363e+06	3.25477e+06	3.05991e+06	5.28196e+06	3.81362e+06	5.03334e+06	4.9298e+06	5.98573e+06	3.50543e+06
11.675_270.23478	4.11724	0.00758709	0.10905	1.80876	LL200+HS:L200	POS	11.675	270.235	C20 H30	all-trans axerophthene	2.70228e-05	0.0999977	NA	level4	ChemSpider	NA	NA	NA	NA	NA	NA	NA	NA	NA	Up	125225	520151	393155	2.35573e+06	1.0041e+06	1.25976e+06	5.77523e+06	2.14719e+06	5.3992e+06	3.55303e+06	2.70534e+06	3.7159e+06
11.683_749.53602	1.87558	0.00616806	0.104113	1.10195	LL200+HS:L200	POS	11.683	749.536	C43 H76 N O7 P	(17Z,21R)-27-Amino-24-hydroxy-24-oxido-19,23,25-trioxa-24lambda~5~-phosphaheptacos-17-en-21-yl (5Z,8Z,11Z,14Z,17Z)-5,8,11,14,17-icosapentaenoate	7.52099e-05	0.100342	NA	level4	ChemSpider	NA	NA	NA	NA	NA	NA	NA	NA	NA	Up	3.36465e+06	4.81156e+06	3.9055e+06	6.75242e+06	7.94804e+06	8.64596e+06	9.95295e+06	8.54512e+06	9.83483e+06	1.19332e+07	1.48363e+07	1.1346e+07
11.697_741.56766	2.27657	0.0139969	0.128102	1.24865	LL200+HS:L200	POS	11.697	741.568	C42 H80 N O7 P	1-(1Z-hexadecenyl)-2-(9Z,12Z-octadecadienoyl)-sn-glycero-3-phosphocholine	0.000418201	0.563943	NA	level4	ChemSpider	NA	NA	NA	NA	NA	NA	NA	NA	NA	Up	666375	864375	969313	1.61954e+06	3.44914e+06	2.39399e+06	2.44951e+06	2.87638e+06	3.54728e+06	5.98437e+06	5.02723e+06	2.79611e+06
11.731_767.58292	1.824	0.0327988	0.160364	1.01684	LL200+HS:L200	POS	11.731	767.583	C44 H82 N O7 P	Arachidonoyl PAF C-16	3.30858e-05	0.0431039	NA	level4	ChemSpider	NA	NA	NA	NA	NA	NA	NA	NA	NA	Up	2.32974e+07	2.50666e+07	2.05251e+07	5.57894e+07	6.67279e+07	7.93548e+07	8.91532e+07	5.96791e+07	5.48807e+07	9.31183e+07	1.14445e+08	8.25922e+07
11.734_510.46526	3.18245	0.00687545	0.107323	1.59887	LL200+HS:L200	POS	11.734	510.465	C32 H62 O4	9-PAHPA	0.00044729	0.87624	NA	level4	ChemSpider	NA	NA	NA	NA	NA	NA	NA	NA	NA	Up	206632	594804	205438	895021	106025	444192	1.82828e+06	1.14107e+06	1.98946e+06	920683	874710	1.04952e+06
11.734_793.56041	2.09048	0.0104912	0.118983	1.22412	LL200+HS:L200	POS	11.734	793.56	C45 H80 N O8 P	1-octadecanoyl-2-[(4Z,7Z,10Z,13Z,16Z)-docosapentaenoyl]-sn-glycero-3-phosphoethanolamine	-0.00174334	-2.19686	NA	level4	ChemSpider	NA	NA	NA	NA	NA	NA	NA	NA	NA	Up	3.12586e+06	4.81486e+06	3.25652e+06	9.01446e+06	8.43635e+06	1.02901e+07	1.57284e+07	1.28892e+07	1.16835e+07	1.09866e+07	1.48705e+07	1.52409e+07
11.739_773.58440	2.02973	0.0331242	0.16135	1.15973	LL200+HS:L200	POS	11.739	773.584	C46 H79 N O8	[(2S)-2-[(5Z,8Z,11Z,14Z,17Z)-5,8,11,14,17-Icosapentaenoyloxy]-3-(palmitoyloxy)propoxy][2-(trimethylammonio)ethoxy]acetate	0.00383154	4.95299	NA	level4	ChemSpider	NA	NA	NA	NA	NA	NA	NA	NA	NA	Up	1.77717e+06	2.12998e+06	1.54131e+06	6.97634e+06	6.99808e+06	7.61178e+06	1.06976e+07	7.32799e+06	6.34379e+06	7.73656e+06	1.27897e+07	9.97747e+06
11.78_793.59866	1.7793	0.0253767	0.150214	1.00665	LL200+HS:L200	POS	11.78	793.599	C46 H84 N O7 P	1-Stearoyl-2-arachidonoylplasmenylcholine	0.000117042	0.147482	NA	level4	ChemSpider	NA	NA	NA	NA	NA	NA	NA	NA	NA	Up	1.2463e+07	1.4493e+07	9.60096e+06	8.57685e+06	2.39839e+07	3.37479e+07	2.83727e+07	2.34866e+07	2.55168e+07	3.29639e+07	4.49108e+07	2.7778e+07
11.803_817.58676	1.86468	0.0322237	0.159765	1.07865	LL200+HS:L200	NEG	11.803	817.587	C44 H84 N O10 P	O-[{(2R)-2-(Docosanoyloxy)-3-[(9Z)-9-hexadecenoyloxy]propoxy}(hydroxy)phosphoryl]-L-serine	0.00347704	4.25282	NA	level4	ChemSpider	NA	NA	NA	NA	NA	NA	NA	NA	NA	Up	1.16649e+06	1.43706e+06	943596	3.29203e+06	3.82406e+06	3.95193e+06	6.16881e+06	4.03715e+06	3.76924e+06	3.62959e+06	5.05535e+06	4.59244e+06
11.825_730.59942	2.29972	0.0231462	0.146639	1.31718	LL200+HS:L200	POS	11.825	730.599	C41 H83 N2 O6 P	N-STEAROYLSPHINGOMYELIN	0.000546197	0.747601	NA	level4	ChemSpider	NA	NA	NA	NA	NA	NA	NA	NA	NA	Up	2.02737e+06	1.40616e+06	3.05496e+06	8.72955e+06	8.31375e+06	8.49441e+06	1.44426e+07	1.05681e+07	1.17663e+07	1.09952e+07	1.29475e+07	1.29318e+07
11.871_859.60931	2.19328	0.00961985	0.115083	1.19025	LL200+HS:L200	POS	11.871	859.609	C50 H86 N O8 P	(2R)-2-[(4Z,7Z,10Z,13Z,16Z,19Z)-4,7,10,13,16,19-Docosahexaenoyloxy]-3-[(11Z)-11-icosenoyloxy]propyl 2-(trimethylammonio)ethyl phosphate	0.000207449	0.24133	NA	level4	ChemSpider	NA	NA	NA	NA	NA	NA	NA	NA	NA	Up	1.27575e+06	1.66598e+06	1.20685e+06	3.22037e+06	3.63466e+06	3.77835e+06	5.70762e+06	3.78281e+06	4.45848e+06	3.70324e+06	8.39737e+06	6.37143e+06
12.004_767.54666	1.75165	0.010881	0.120248	1.06779	LL200+HS:L200	POS	12.004	767.547	C43 H78 N O8 P	1-stearoyl-2-arachidonoyl-sn-glycero-3-phosphoethanolamine	0.00015156	0.19746	NA	level4	ChemSpider	NA	NA	NA	NA	NA	NA	NA	NA	NA	Up	3.11594e+07	5.45614e+07	4.10335e+07	7.9792e+07	7.33995e+07	8.01052e+07	1.13988e+08	8.87795e+07	1.09218e+08	1.00178e+08	1.02999e+08	1.15523e+08
12.17_831.60218	1.75231	0.0378724	0.166183	1.03526	LL200+HS:L200	NEG	12.17	831.602	C45 H86 N O10 P	O-(Hydroxy{(2R)-3-(pentadecanoyloxy)-2-[(15Z)-15-tetracosenoyloxy]propoxy}phosphoryl)-L-serine	0.00324552	3.90274	NA	level4	ChemSpider	NA	NA	NA	NA	NA	NA	NA	NA	NA	Up	2.55566e+07	2.82166e+07	2.93147e+07	7.48107e+07	9.90715e+07	8.34077e+07	1.02408e+08	8.81882e+07	9.24281e+07	8.97745e+07	1.20053e+08	1.03597e+08
12.192_747.57781	2.28716	0.0161631	0.13247	1.24725	LL200+HS:L200	POS	12.192	747.578	C41 H82 N O8 P	1730641	4.45247e-06	0.00595586	NA	level4	ChemSpider	NA	NA	NA	NA	NA	NA	NA	NA	NA	Up	720623	1.04744e+06	651913	2.9953e+06	2.11081e+06	2.63638e+06	6.85119e+06	2.83903e+06	2.79106e+06	3.15421e+06	3.72936e+06	3.87836e+06
12.24_782.56575	1.8314	0.0464714	0.178895	1.01294	LL200+HS:L200	POS	12.24	782.566	C44 H81 N O8 P	1-O-palmitoyl-2-O-arachidonoyl-sn-glycero-3-phosphocholine	-0.00422949	-5.40462	NA	level4	ChemSpider	NA	NA	NA	NA	NA	NA	NA	NA	NA	Up	1.05953e+06	1.0547e+06	846520	2.84014e+06	2.35487e+06	5.01676e+06	3.89723e+06	2.637e+06	2.81474e+06	3.26852e+06	5.98126e+06	5.5254e+06
12.302_815.58153	2.12463	0.011297	0.121269	1.23295	LL200+HS:L200	POS	12.302	815.582	C48 H82 N O7 P	3-[(4Z,7Z,10Z,13Z,16Z,19Z)-4,7,10,13,16,19-Docosahexaenoyloxy]-2-[(1Z,11Z)-1,11-octadecadien-1-yloxy]propyl 2-(trimethylammonio)ethyl phosphate	-0.00136064	-1.6683	NA	level4	ChemSpider	NA	NA	NA	NA	NA	NA	NA	NA	NA	Up	462292	1.31913e+06	635687	2.06372e+06	823008	1.3148e+06	3.3045e+06	2.61077e+06	2.54451e+06	1.96371e+06	2.20403e+06	1.43462e+06
12.303_719.58328	2.36102	0.0216217	0.143556	1.25518	LL200+HS:L200	POS	12.303	719.583	C40 H82 N O7 P	1-hexadecyl-2-hexadecanoyl-sn-glycero-3-phosphocholine	0.000394602	0.548376	NA	level4	ChemSpider	NA	NA	NA	NA	NA	NA	NA	NA	NA	Up	3.85064e+06	2.13397e+06	3.68948e+06	1.08217e+07	1.12911e+07	1.52503e+07	1.52879e+07	1.20466e+07	1.16918e+07	2.23882e+07	2.75211e+07	2.21203e+07
12.321_690.51996	3.83317	0.0392538	0.167262	1.82923	LL200+HS:L200	POS	12.321	690.52	C45 H70 O5	(2S)-1-Hydroxy-3-[(5Z,8Z,11Z,14Z,17Z)-5,8,11,14,17-icosapentaenoyloxy]-2-propanyl (7Z,10Z,13Z,16Z)-7,10,13,16-docosatetraenoate	-0.00236028	-3.41811	NA	level4	ChemSpider	NA	NA	NA	NA	NA	NA	NA	NA	NA	Up	2.79172e+06	83052.2	81124.1	5.54466e+06	1.80722e+06	1.40101e+07	7.74222e+06	9.94364e+06	7.27895e+06	1.79526e+07	2.82207e+07	2.20764e+07
12.344_751.55174	2.10251	0.0240272	0.149251	1.21665	LL200+HS:L200	POS	12.344	751.552	C43 H78 N O7 P	1-(1Z-octadecenyl)-2-arachidonoyl-sn-glycero-3-phosphoethanolamine	0.000154954	0.206179	NA	level4	ChemSpider	NA	NA	NA	NA	NA	NA	NA	NA	NA	Up	2.02136e+06	4.3113e+06	2.6624e+06	9.24301e+06	7.99685e+06	1.13834e+07	1.223e+07	1.00315e+07	1.02059e+07	1.39656e+07	1.86219e+07	1.4038e+07
12.367_823.60944	2.25842	0.0342034	0.162856	1.22279	LL200+HS:L200	POS	12.367	823.609	C47 H86 N O8 P	(23R)-29-Amino-26-hydroxy-26-oxido-20-oxo-21,25,27-trioxa-26lambda~5~-phosphanonacosan-23-yl (7Z,10Z,13Z,16Z)-7,10,13,16-docosatetraenoate	0.000331868	0.402944	NA	level4	ChemSpider	NA	NA	NA	NA	NA	NA	NA	NA	NA	Up	1.3172e+07	1.86343e+07	7.50751e+06	6.82884e+07	3.39569e+07	5.95339e+07	6.96241e+07	4.79602e+07	4.61371e+07	6.05047e+07	1.27419e+08	1.02507e+08
12.507_799.60956	2.20258	0.0454729	0.177385	1.20527	LL200+HS:L200	POS	12.507	799.61	C45 H86 N O8 P	(23R)-29-Amino-26-hydroxy-26-oxido-20-oxo-21,25,27-trioxa-26lambda~5~-phosphanonacosan-23-yl (11Z,14Z)-11,14-icosadienoate	0.000453392	0.567016	NA	level4	ChemSpider	NA	NA	NA	NA	NA	NA	NA	NA	NA	Up	3.6048e+06	4.05146e+06	2.3887e+06	1.58834e+07	1.83822e+07	2.22262e+07	2.10203e+07	1.65514e+07	1.48844e+07	1.77882e+07	4.31894e+07	3.31186e+07
12.632_761.59384	1.97694	0.0312457	0.158054	1.15608	LL200+HS:L200	POS	12.632	761.594	C42 H84 N O8 P	1-hexadecanoyl-2-octadecanoyl-sn-glycero-3-phosphocholine	0.000385111	0.505665	NA	level4	ChemSpider	NA	NA	NA	NA	NA	NA	NA	NA	NA	Up	5.41875e+06	4.64716e+06	5.20627e+06	2.10709e+07	1.57091e+07	2.06546e+07	2.83658e+07	1.9339e+07	1.95794e+07	2.12092e+07	2.64996e+07	2.87441e+07
12.677_784.64657	3.23798	0.0381764	0.166399	1.71237	LL200+HS:L200	POS	12.677	784.647	C45 H89 N2 O6 P	N-[(13Z)-docosenoyl]sphing-4-enine-1-phosphocholine	0.00074053	0.943777	NA	level4	ChemSpider	NA	NA	NA	NA	NA	NA	NA	NA	NA	Up	752369	96565.3	233057	4.67823e+06	5.28851e+06	6.65844e+06	1.22112e+07	7.26056e+06	6.28756e+06	7.65428e+06	1.18978e+07	1.2024e+07
12.792_813.62579	2.75421	0.0189267	0.137657	1.38404	LL200+HS:L200	POS	12.792	813.626	C46 H88 N O8 P	(2R)-3-(Icosanoyloxy)-2-[(9Z,12Z)-9,12-octadecadienoyloxy]propyl 2-(trimethylammonio)ethyl phosphate	0.00103118	1.2674	NA	level4	ChemSpider	NA	NA	NA	NA	NA	NA	NA	NA	NA	Up	665939	246408	417956	1.61337e+06	1.98663e+06	2.36775e+06	3.09239e+06	1.88377e+06	2.70505e+06	2.63869e+06	5.50682e+06	4.27363e+06
12.8_833.61756	1.93543	0.0436051	0.174562	1.16785	LL200+HS:L200	NEG	12.8	833.618	C45 H88 N O10 P	O-{Hydroxy[(2R)-3-(pentadecanoyloxy)-2-(tetracosanoyloxy)propoxy]phosphoryl}-L-serine	0.00297926	3.57391	NA	level4	ChemSpider	NA	NA	NA	NA	NA	NA	NA	NA	NA	Up	780110	870684	736208	3.37112e+06	4.98332e+06	2.88622e+06	4.89668e+06	3.5105e+06	3.76532e+06	3.63484e+06	5.29582e+06	5.27227e+06
2.039_268.08077	4.98193	0.0317938	0.159354	1.49406	LL200+HS:L200	POS	2.039	268.081	C10 H12 N4 O5	4687	-2.77711e-06	-0.0103592	NA	level4	ChemSpider	NA	NA	NA	NA	NA	NA	NA	NA	NA	Up	218318	368574	367086	536311	2.66642e+06	403399	4.35584e+06	330568	3.07796e+06	909659	7.16717e+06	6.87693e+06
2.127_221.07233	2.62476	0.00116037	0.0462166	1.44997	LL200+HS:L200	POS	2.127	221.072	C8 H15 N O4 S	N-[(2S)-2-Hydroxypropanoyl]methionine	0.000149923	0.678161	NA	level4	ChemSpider	NA	NA	NA	NA	NA	NA	NA	NA	NA	Up	1.75202e+06	2.69194e+06	2.95113e+06	6.09333e+06	4.55648e+06	3.81141e+06	7.60372e+06	1.33303e+07	9.58344e+06	1.10067e+07	7.74501e+06	8.09854e+06
2.148_217.13157	3.75439	0.00269725	0.0732429	1.68891	LL200+HS:L200	POS	2.148	217.132	C10 H19 N O4	propionylcarnitine	0.000166159	0.765248	NA	level4	ChemSpider	NA	NA	NA	NA	NA	NA	NA	NA	NA	Up	4.10043e+06	6.15892e+06	7.18353e+06	2.228e+07	1.48647e+07	2.32804e+07	3.92172e+07	8.55901e+07	3.78327e+07	5.88833e+07	3.3226e+07	3.75973e+07
2.198_256.14234	0.0497356	0.00469502	0.0963679	2.22844	LL200+HS:L200	POS	2.198	256.142	C12 H20 N2 O4	Pulcherriminic acid	3.16633e-05	0.123616	NA	level4	ChemSpider	NA	NA	NA	NA	NA	NA	NA	NA	NA	Down	2.53166e+07	1.00832e+07	1.53395e+07	671609	1.25715e+06	2.90344e+06	1.06914e+06	229571	897825	70466.9	90634.3	406242
2.239_199.12105	2.51084	0.000470547	0.0268345	1.36519	LL200+HS:L200	POS	2.239	199.121	C10 H17 N O3	HHL	0.000206476	1.03694	NA	level4	ChemSpider	NA	NA	NA	NA	NA	NA	NA	NA	NA	Up	7.34979e+06	7.98198e+06	8.67481e+06	1.59097e+07	7.7596e+06	9.91611e+06	2.56999e+07	3.77259e+07	1.89278e+07	2.8255e+07	1.55275e+07	1.84682e+07
2.282_227.11588	3.845	0.00048536	0.0268814	1.65488	LL200+HS:L200	POS	2.282	227.116	C11 H17 N O4	Dimetofrine	0.00011754	0.517535	NA	level4	ChemSpider	NA	NA	NA	NA	NA	NA	NA	NA	NA	Up	3.26736e+06	4.38392e+06	5.17113e+06	1.20827e+07	5.08334e+06	4.77014e+06	1.64637e+07	4.07131e+07	1.33843e+07	3.30265e+07	1.53798e+07	1.46796e+07
2.303_246.10394	0.0672234	0.000480293	0.0268784	2.31111	LL200+HS:L200	POS	2.303	246.104	C10 H18 N2 O3 S	pro-met	0.000122844	0.499155	NA	level4	ChemSpider	NA	NA	NA	NA	NA	NA	NA	NA	NA	Down	4.04986e+06	1.1677e+07	9.73036e+06	1.091e+06	1.8219e+06	2.19045e+06	311772	75526.3	206858	154201	1.0372e+06	268827
2.387_293.17384	0.0290021	0.0494256	0.182867	1.80169	LL200+HS:L200	POS	2.387	293.174	C15 H23 N3 O3	Lys-phe	-9.67511e-05	-0.330013	NA	level4	ChemSpider	NA	NA	NA	NA	NA	NA	NA	NA	NA	Down	2.12541e+06	4.148e+06	4.91511e+06	43926.7	123977	81065.6	58095.7	45709.4	49896.6	80022.4	49631.8	48355.5
2.419_125.04782	2.43737	0.0245149	0.150095	1.11191	LL200+HS:L200	POS	2.419	125.048	C6 H7 N O2	N-ethylmaleimide	0.000137772	1.10176	NA	level4	ChemSpider	NA	NA	NA	NA	NA	NA	NA	NA	NA	Up	1.14472e+07	1.76235e+07	1.66749e+07	2.39948e+07	2.3637e+07	2.1161e+07	3.33892e+07	2.19388e+07	3.34806e+07	1.20714e+08	3.22681e+07	3.73816e+07
2.476_307.12668	2.23346	0.0267356	0.152913	1.24183	LL200+HS:L200	POS	2.476	307.127	C13 H17 N5 O4	3-(2-Deoxy-beta-D-erythro-pentofuranosyl)-4,6,7,8-tetrahydropyrimido[1,2-a]purin-10(3H)-one	-0.00137492	-4.47669	NA	level4	ChemSpider	NA	NA	NA	NA	NA	NA	NA	NA	NA	Up	3.84544e+06	7.75068e+06	5.70095e+06	3.61316e+07	1.02361e+07	1.12109e+07	4.20118e+07	4.20645e+07	2.39794e+07	1.11334e+07	2.37878e+07	2.42547e+07
2.501_305.08592	0.446835	0.0290513	0.156593	1.01733	LL200+HS:L200	NEG	2.501	305.086	C10 H15 N3 O8	convicine	6.17883e-06	0.0202527	NA	level4	ChemSpider	NA	NA	NA	NA	NA	NA	NA	NA	NA	Down	65440.7	118807	105145	37047.1	33250.4	40206.9	30492.3	31118.1	30776.9	30974.4	30620.1	24706.3
2.574_216.14745	0.0947772	0.0124666	0.124887	1.78546	LL200+HS:L200	POS	2.574	216.147	C10 H20 N2 O3	Valylvaline	6.24194e-05	0.288782	NA	level4	ChemSpider	NA	NA	NA	NA	NA	NA	NA	NA	NA	Down	4.57886e+07	1.1076e+08	4.12257e+07	5.08275e+06	7.62039e+06	9.76862e+06	2.88307e+06	3.13541e+06	1.7789e+06	3.95888e+06	5.68395e+06	3.43407e+06
2.586_266.12662	0.35096	0.0281467	0.155067	1.14965	LL200+HS:L200	POS	2.586	266.127	C13 H18 N2 O4	threonylphenylalanine	-3.33383e-05	-0.125272	NA	level4	ChemSpider	NA	NA	NA	NA	NA	NA	NA	NA	NA	Down	4.58189e+06	7.67323e+06	1.12826e+07	3.24773e+06	1.75617e+06	2.76081e+06	1.85774e+06	1.63563e+06	1.79189e+06	1.87035e+06	1.82403e+06	2.00625e+06
2.6_309.16881	0.387596	0.00727774	0.109025	1.23517	LL200+HS:L200	POS	2.6	309.169	C15 H23 N3 O4	2762577	-4.70189e-05	-0.152082	NA	level4	ChemSpider	NA	NA	NA	NA	NA	NA	NA	NA	NA	Down	1.87082e+07	3.008e+07	7.44834e+06	1.11848e+07	9.10736e+06	1.28959e+07	4.23679e+06	5.38205e+06	5.84133e+06	5.45961e+06	8.36647e+06	5.37441e+06
2.636_266.09028	2.57433	0.01104	0.120248	1.44049	LL200+HS:L200	POS	2.636	266.09	C12 H14 N2 O5	2-Cyclohexyl-4,6-dinitrophenol	9.18874e-06	0.0345324	NA	level4	ChemSpider	NA	NA	NA	NA	NA	NA	NA	NA	NA	Up	4.77163e+06	1.7477e+07	1.79874e+07	2.18938e+07	3.14959e+07	3.03739e+07	5.62054e+07	6.01575e+07	5.95759e+07	5.37367e+07	4.03741e+07	4.91657e+07
2.661_341.15873	0.0755356	0.004124	0.0899839	2.03639	LL200+HS:L200	POS	2.661	341.159	C13 H28 N O7 P	(2R)-3-Hydroxy-2-(pentanoyloxy)propyl 2-(trimethylammonio)ethyl phosphate	-0.00160882	-4.71572	NA	level4	ChemSpider	NA	NA	NA	NA	NA	NA	NA	NA	NA	Down	6.7099e+06	9.11493e+06	4.71462e+06	1.35479e+06	843950	785985	294501	256049	295691	428260	276077	226335
2.716_402.22293	3.33985	0.0166234	0.133222	1.6858	LL200+HS:L200	POS	2.716	402.223	C24 H34 O3 S	spiroxasone	6.51263e-05	0.161916	NA	level4	ChemSpider	NA	NA	NA	NA	NA	NA	NA	NA	NA	Up	2.27477e+06	9.6617e+06	3.47118e+06	2.4338e+07	3.2472e+07	2.46671e+07	6.3222e+07	6.24094e+07	6.19855e+07	6.18745e+07	3.70575e+07	3.70315e+07
2.853_280.14220	0.23468	0.0432592	0.174429	1.2476	LL200+HS:L200	POS	2.853	280.142	C14 H20 N2 O4	MFCD02728197	-0.00010604	-0.378522	NA	level4	ChemSpider	NA	NA	NA	NA	NA	NA	NA	NA	NA	Down	2.03883e+06	4.4942e+06	3.15247e+06	429743	509424	752228	545358	537357	407585	478837	354313	346486
2.855_136.03861	2.00178	0.040572	0.169828	1.15079	LL200+HS:L200	POS	2.855	136.039	C5 H4 N4 O	Hypoxanthin	9.91735e-05	0.72901	NA	level4	ChemSpider	NA	NA	NA	NA	NA	NA	NA	NA	NA	Up	1.10831e+06	4.57725e+06	2.40805e+06	4.35838e+06	9.64269e+06	6.35916e+06	1.30387e+07	4.76105e+06	8.63655e+06	1.08282e+07	9.51406e+06	1.01797e+07
2.862_329.15848	0.105091	0.000181475	0.0141198	2.07893	LL200+HS:L200	POS	2.862	329.158	C14 H23 N3 O6	Valclavam	-0.000203199	-0.617328	NA	level4	ChemSpider	NA	NA	NA	NA	NA	NA	NA	NA	NA	Down	1.06863e+06	3.25219e+06	2.04862e+06	751213	473812	872487	94450.9	78858.9	149368	253115	214307	99698.2
2.883_170.10554	0.261381	0.0034018	0.0801498	1.50791	LL200+HS:L200	POS	2.883	170.106	C8 H14 N2 O2	Levetiracetam	1.01607e-05	0.0597319	NA	level4	ChemSpider	NA	NA	NA	NA	NA	NA	NA	NA	NA	Down	3.13304e+06	7.17184e+06	5.0458e+06	1.52187e+06	1.69931e+06	2.85674e+06	714457	1.13464e+06	840449	973718	1.14279e+06	794979
2.905_662.25117	0.188054	0.0271708	0.153487	1.61008	LL200+HS:L200	NEG	2.905	662.251	C40 H38 O9	(2E)-1-(3-{6-[2,4-Dihydroxy-3-(3-methyl-2-buten-1-yl)benzoyl]-5-(4-hydroxyphenyl)-3-methyl-2-cyclohexen-1-yl}-2,4-dihydroxyphenyl)-3-(2,4-dihydroxyphenyl)-2-propen-1-one	-0.000409426	-0.618233	NA	level4	ChemSpider	NA	NA	NA	NA	NA	NA	NA	NA	NA	Down	362053	317312	552153	5.99134e+06	1.27233e+06	1.57783e+06	126243	120326	71582.4	61965.6	1.00383e+06	510328
2.909_376.18431	0.378259	0.00807422	0.110707	1.37896	LL200+HS:L200	POS	2.909	376.184	C17 H24 N6 O4	Selodenoson	-0.00159039	-4.22768	NA	level4	ChemSpider	NA	NA	NA	NA	NA	NA	NA	NA	NA	Down	2.35646e+06	2.80311e+06	5.39332e+06	6.27387e+06	2.91724e+06	3.48056e+06	1.17149e+06	1.40119e+06	513836	709067	2.64759e+06	2.34174e+06
2.913_247.05145	0.192139	0.0135395	0.127722	1.53559	LL200+HS:L200	POS	2.913	247.051	C12 H10 Cl N3 O	forchlorfenuron	0.000214849	0.869654	NA	level4	ChemSpider	NA	NA	NA	NA	NA	NA	NA	NA	NA	Down	1.24924e+06	8.96345e+06	2.21391e+07	9.29554e+06	5.93375e+06	9.14148e+06	2.88393e+06	272745	2.78354e+06	1.5803e+06	1.69173e+06	1.68635e+06
2.922_218.12670	0.124348	0.00334677	0.0797857	1.83737	LL200+HS:L200	POS	2.922	218.127	C9 H18 N2 O4	meprobamate	4.42855e-05	0.203026	NA	level4	ChemSpider	NA	NA	NA	NA	NA	NA	NA	NA	NA	Down	1.80819e+07	4.25028e+07	3.64804e+07	4.61134e+06	6.50272e+06	6.58334e+06	870317	2.53535e+06	1.99288e+06	2.99522e+06	4.6883e+06	1.18843e+06
2.932_297.12113	1.78496	0.00589359	0.103893	1.02673	LL200+HS:L200	POS	2.932	297.121	C14 H19 N O6	N-(2-Phenylethyl)-beta-D-glucopyranuronosylamine	-0.00010295	-0.346491	NA	level4	ChemSpider	NA	NA	NA	NA	NA	NA	NA	NA	NA	Up	1.35219e+08	1.99444e+08	2.14578e+08	1.85596e+08	1.49362e+08	1.6183e+08	2.87923e+08	4.63531e+08	3.47686e+08	3.40245e+08	2.39621e+08	1.88111e+08
2.941_287.98058	223.112	0.000177319	0.0139043	3.7065	LL200+HS:L200	NEG	2.941	287.981	C5 F12	Perflenapent	-0.000254337	-0.883173	NA	level4	ChemSpider	NA	NA	NA	NA	NA	NA	NA	NA	NA	Up	33830.8	164045	82021.9	1.81358e+06	940482	2.4809e+06	3.41257e+08	3.5086e+08	1.91143e+08	9.45071e+07	1.33503e+08	1.19159e+08
2.954_246.12155	0.251885	0.0333453	0.161416	1.32279	LL200+HS:L200	POS	2.954	246.122	C10 H18 N2 O5	L-gamma-Glutamyl-L-valine	-1.78281e-05	-0.072436	NA	level4	ChemSpider	NA	NA	NA	NA	NA	NA	NA	NA	NA	Down	3.02856e+07	8.20044e+07	5.18059e+07	5.5756e+06	1.28726e+07	3.01761e+07	3.84593e+06	1.33091e+07	1.0887e+07	8.38803e+06	1.47774e+07	2.37352e+06
2.956_323.95719	223.394	0.000215666	0.0156858	3.71495	LL200+HS:L200	NEG	2.956	323.957	C8 H11 Cl3 O7	Urochloralic Acid	0.00015467	0.477439	NA	level4	ChemSpider	NA	NA	NA	NA	NA	NA	NA	NA	NA	Up	26865.7	164045	82021.9	1.81358e+06	940482	2.4809e+06	3.41257e+08	3.5086e+08	1.91143e+08	9.45071e+07	1.33503e+08	1.19159e+08
2.96_360.11699	0.271008	0.000958037	0.0409074	1.6808	LL200+HS:L200	NEG	2.96	360.117	C14 H20 N2 O9	acalyphin	0.000111876	0.310667	NA	level4	ChemSpider	NA	NA	NA	NA	NA	NA	NA	NA	NA	Down	1.80136e+06	2.80045e+06	2.69913e+06	2.40856e+06	1.84286e+06	2.05238e+06	240891	397735	680910	1.29114e+06	526379	549928
2.98_302.13786	0.0499589	0.0173525	0.134858	1.91307	LL200+HS:L200	NEG	2.98	302.138	C15 H18 N4 O3	Histidylphenylalanine	-2.89932e-05	-0.0959602	NA	level4	ChemSpider	NA	NA	NA	NA	NA	NA	NA	NA	NA	Down	774623	1.82511e+06	2.35432e+06	72380.7	95404.4	115976	63916.1	65764.7	41649.5	26786.6	32503.5	31055.2
3.011_143.07348	0.328573	0.0217146	0.143655	1.21026	LL200+HS:L200	NEG	3.011	143.073	C10 H9 N	Naphthalen-2-amine	-1.47543e-05	-0.103124	NA	level4	ChemSpider	NA	NA	NA	NA	NA	NA	NA	NA	NA	Down	1.35765e+06	3.08323e+06	2.64383e+06	682332	704413	745445	500212	472321	492335	544129	563568	455860
3.017_430.16177	0.284749	0.000616404	0.0315656	1.52804	LL200+HS:L200	NEG	3.017	430.162	C23 H26 O8	Sesartemin	-0.00100196	-2.32925	NA	level4	ChemSpider	NA	NA	NA	NA	NA	NA	NA	NA	NA	Down	2.84505e+06	5.71434e+06	4.79279e+06	1.88881e+06	2.05854e+06	2.27554e+06	604823	505125	993538	1.33688e+06	1.19562e+06	938003
3.042_278.12670	0.28943	0.0077079	0.109426	1.40364	LL200+HS:L200	POS	3.042	278.127	C14 H18 N2 O4	7098783	4.11159e-05	0.147831	NA	level4	ChemSpider	NA	NA	NA	NA	NA	NA	NA	NA	NA	Down	1.61196e+07	2.30366e+07	2.40508e+07	7.29572e+06	6.63302e+06	6.30697e+06	4.30263e+06	3.45926e+06	3.83326e+06	4.39446e+06	4.78884e+06	3.37238e+06
3.071_346.17412	0.036291	0.0034206	0.0801832	2.3225	LL200+HS:L200	POS	3.071	346.174	C15 H26 N2 O7	Acmimycin	0.000117597	0.339706	NA	level4	ChemSpider	NA	NA	NA	NA	NA	NA	NA	NA	NA	Down	8.70286e+06	8.40353e+06	6.65215e+06	356449	637049	1.1998e+06	370639	101485	170143	101613	97934.8	100002
3.138_312.11440	0.113079	0.0418576	0.172182	1.48584	LL200+HS:L200	POS	3.138	312.114	C14 H20 N2 O4 S	met-tyr	1.9254e-05	0.0616889	NA	level4	ChemSpider	NA	NA	NA	NA	NA	NA	NA	NA	NA	Down	436442	678172	2.18558e+06	76064.1	65984.9	176789	60089.3	55663.8	77103.5	52111.1	119435	44833.2
3.262_213.13659	0.0445967	0.0220272	0.14393	1.88905	LL200+HS:L200	POS	3.262	213.137	C11 H19 N O3	C7-HSL	9.9016e-05	0.464566	NA	level4	ChemSpider	NA	NA	NA	NA	NA	NA	NA	NA	NA	Down	2.76928e+07	6.92595e+07	2.48739e+07	1.50486e+06	1.59496e+06	2.38165e+06	395697	1.16194e+06	747888	1.43689e+06	1.25016e+06	684930
3.28_303.16822	6.85884	0.000145376	0.0118629	2.12551	LL200+HS:L200	POS	3.28	303.168	C14 H25 N O6	(4S)-4-[(6-Carboxyhexanoyl)oxy]-4-(trimethylammonio)butanoate	2.80705e-05	0.0925906	NA	level4	ChemSpider	NA	NA	NA	NA	NA	NA	NA	NA	NA	Up	308692	724539	490803	1.55063e+06	983066	334663	6.51023e+06	3.66287e+06	7.84271e+06	4.71129e+06	3.83096e+06	3.56871e+06
3.283_192.09448	1.87254	0.0412521	0.171377	1.1253	LL200+HS:L200	POS	3.283	192.094	C15 H12	METHYLPHENANTHRENE	0.000581733	3.02838	NA	level4	ChemSpider	NA	NA	NA	NA	NA	NA	NA	NA	NA	Up	3.9196e+07	1.30803e+08	1.11882e+08	2.47505e+08	2.32376e+08	2.25203e+08	3.74691e+08	2.45849e+08	3.26808e+08	2.91316e+08	2.85754e+08	3.23711e+08
3.294_312.11412	0.150663	0.0141266	0.128102	1.60654	LL200+HS:L200	POS	3.294	312.114	C17 H17 Cl N4	Norclozapine	-5.19142e-05	-0.166331	NA	level4	ChemSpider	NA	NA	NA	NA	NA	NA	NA	NA	NA	Down	734977	1.41041e+06	2.18558e+06	650063	204178	176789	130519	125790	137827	145717	146259	121743
3.308_322.15295	0.273772	0.00283251	0.0736669	1.70471	LL200+HS:L200	POS	3.308	322.153	C16 H22 N2 O5	etifenin	7.76081e-05	0.240905	NA	level4	ChemSpider	NA	NA	NA	NA	NA	NA	NA	NA	NA	Down	3.27796e+06	4.269e+06	4.75468e+06	3.71934e+06	2.01056e+06	2.24187e+06	994246	603673	314469	367141	2.29161e+06	979163
3.354_293.13756	0.0777238	0.0414701	0.171655	1.62663	LL200+HS:L200	POS	3.354	293.138	C14 H19 N3 O4	phe-gln	1.45289e-06	0.00495634	NA	level4	ChemSpider	NA	NA	NA	NA	NA	NA	NA	NA	NA	Down	5.8722e+06	8.49366e+06	7.12409e+06	341126	313977	660167	303689	275278	306756	319392	308926	258468
3.386_201.00981	4.08347	0.00354902	0.0813276	1.8648	LL200+HS:L200	POS	3.386	201.01	C7 H7 N O4 S	carzenide	0.000232301	1.15567	NA	level4	ChemSpider	NA	NA	NA	NA	NA	NA	NA	NA	NA	Up	379205	720395	641032	5.27671e+06	1.02016e+06	1.269e+06	7.41896e+06	4.99565e+06	3.5707e+06	6.85896e+06	7.91774e+06	7.2408e+06
3.386_222.10049	0.245981	0.00754113	0.10905	1.46261	LL200+HS:L200	POS	3.386	222.1	C11 H14 N2 O3	Gly-Phe	4.55257e-05	0.204978	NA	level4	ChemSpider	NA	NA	NA	NA	NA	NA	NA	NA	NA	Down	3.1626e+07	8.22332e+07	5.94809e+07	1.40018e+07	1.49876e+07	2.56153e+07	7.54915e+06	1.12387e+07	9.19133e+06	8.85094e+06	1.25459e+07	6.69409e+06
3.404_392.13338	0.329763	0.00987523	0.116884	1.54087	LL200+HS:L200	POS	3.404	392.133	C16 H24 O11	shanzhiside	0.00151757	3.87004	NA	level4	ChemSpider	NA	NA	NA	NA	NA	NA	NA	NA	NA	Down	906981	585582	651549	376432	327710	429522	195058	68998.5	138513	42298.3	231953	404067
3.425_273.16886	0.397417	0.019329	0.138217	1.12837	LL200+HS:L200	POS	3.425	273.169	C12 H23 N3 O4	N~6~-(5-Oxo-D-isoleucyl)-L-lysine	8.31032e-06	0.0304219	NA	level4	ChemSpider	NA	NA	NA	NA	NA	NA	NA	NA	NA	Down	1.32907e+06	3.5312e+06	1.52402e+06	612988	953041	1.29125e+06	472954	718457	486356	878778	856548	259665
3.475_230.16309	0.0385903	0.0265055	0.152383	1.8986	LL200+HS:L200	POS	3.475	230.163	C11 H22 N2 O3	Leu-Val	5.15917e-05	0.224153	NA	level4	ChemSpider	NA	NA	NA	NA	NA	NA	NA	NA	NA	Down	3.50262e+07	7.92984e+07	7.2909e+07	1.97214e+06	2.29627e+06	2.71527e+06	873793	1.37066e+06	1.08546e+06	1.6029e+06	1.7124e+06	849681
3.475_236.11612	0.146222	0.0305384	0.157834	1.48858	LL200+HS:L200	POS	3.475	236.116	C12 H16 N2 O3	hexobarbital	2.45016e-05	0.103769	NA	level4	ChemSpider	NA	NA	NA	NA	NA	NA	NA	NA	NA	Down	1.33719e+07	3.35762e+07	3.17307e+07	2.52942e+06	2.7221e+06	2.87305e+06	1.25272e+06	5.42561e+06	1.32386e+06	1.59054e+06	1.90163e+06	1.19822e+06
3.517_294.15789	0.100896	0.00766062	0.10905	1.81768	LL200+HS:L200	POS	3.517	294.158	C15 H22 N2 O4	Troxipide	-6.60903e-05	-0.224676	NA	level4	ChemSpider	NA	NA	NA	NA	NA	NA	NA	NA	NA	Down	3.1681e+06	5.71747e+06	7.14368e+06	638325	708378	673450	142166	390563	281798	427203	410460	168920
3.519_381.15401	0.064396	0.0144164	0.128229	1.8667	LL200+HS:L200	POS	3.519	381.154	C18 H24 F N3 O3 S	benthiavalicarb-isopropyl	0.00176532	4.63152	NA	level4	ChemSpider	NA	NA	NA	NA	NA	NA	NA	NA	NA	Down	923575	1.86832e+06	1.23216e+06	105931	140246	60511.7	36372.5	73423.7	52066.6	69060.4	25334.4	22625.1
3.543_360.18966	0.288495	0.00746553	0.10905	1.47071	LL200+HS:L200	POS	3.543	360.19	C17 H24 N6 O3	Arg-Trp	-0.00132606	-3.68155	NA	level4	ChemSpider	NA	NA	NA	NA	NA	NA	NA	NA	NA	Down	3.53198e+06	4.4518e+06	7.58385e+06	1.68059e+06	2.2538e+06	2.20053e+06	417312	1.37951e+06	1.86977e+06	1.35059e+06	967883	276010
3.551_276.11092	0.188426	0.019742	0.138819	1.46704	LL200+HS:L200	POS	3.551	276.111	C14 H16 N2 O4	Oxagrelate	-8.89299e-05	-0.32208	NA	level4	ChemSpider	NA	NA	NA	NA	NA	NA	NA	NA	NA	Down	1.39649e+06	3.13734e+06	3.09376e+06	383494	515288	475044	286372	231557	258145	268249	295255	356525
3.623_195.05336	3.32175	0.0292162	0.156593	2.02027	LL200+HS:L200	POS	3.623	195.053	C9 H9 N O4	2-((4-Nitrophenoxy)methyl)oxirane	0.000198443	1.01738	NA	level4	ChemSpider	NA	NA	NA	NA	NA	NA	NA	NA	NA	Up	44993.8	48046.3	47350.6	4.60572e+06	1.61169e+06	680369	3.65199e+06	2.96235e+06	3.04032e+06	8.14224e+06	2.28043e+06	3.30173e+06
3.634_390.20038	0.327348	0.00128714	0.0491859	1.57188	LL200+HS:L200	POS	3.634	390.2	C20 H29 F3 O4	20-trifluoromethyl-leukotriene B4	-0.00141026	-3.61417	NA	level4	ChemSpider	NA	NA	NA	NA	NA	NA	NA	NA	NA	Down	1.54715e+07	1.34745e+07	2.55642e+07	2.2615e+07	1.48735e+07	1.41174e+07	4.71935e+06	3.1242e+06	3.15115e+06	4.35431e+06	1.24235e+07	6.96444e+06
3.728_333.16899	0.324788	0.00561011	0.103699	1.47548	LL200+HS:L200	NEG	3.728	333.169	C17 H23 N3 O4	Primidolol	0.000133186	0.399757	NA	level4	ChemSpider	NA	NA	NA	NA	NA	NA	NA	NA	NA	Down	947243	1.89639e+06	1.19243e+06	523353	477566	777257	255848	177399	139160	158567	815618	341806
3.739_261.11135	0.320674	0.0122138	0.124583	1.27513	LL200+HS:L200	POS	3.739	261.111	C13 H15 N3 O3	Imazapyr	1.11259e-05	0.0426099	NA	level4	ChemSpider	NA	NA	NA	NA	NA	NA	NA	NA	NA	Down	4.90175e+06	1.48935e+07	1.22772e+07	2.88607e+06	3.95489e+06	5.88002e+06	2.47035e+06	1.74681e+06	3.00497e+06	2.04233e+06	2.83754e+06	2.2621e+06
3.762_275.12700	0.111342	0.0126159	0.125095	1.71531	LL200+HS:L200	POS	3.762	275.127	C14 H17 N3 O3	Alanyltryptophan	5.14413e-06	0.0186973	NA	level4	ChemSpider	NA	NA	NA	NA	NA	NA	NA	NA	NA	Down	2.1075e+06	6.01149e+06	3.33507e+06	427464	547049	493382	186123	188315	218031	329093	315443	201745
3.799_304.15346	2.75549	0.021406	0.142792	1.41318	LL200+HS:L200	POS	3.799	304.153	C17 H22 N O4	Balfourodinine	-0.0014257	-4.68742	NA	level4	ChemSpider	NA	NA	NA	NA	NA	NA	NA	NA	NA	Up	1.17458e+06	8.46111e+06	3.1641e+06	1.41456e+07	4.91817e+06	7.43151e+06	3.75612e+07	2.13151e+07	1.4132e+07	1.32532e+07	1.14766e+07	1.05389e+07
3.807_402.19039	0.0551617	0.0137655	0.127937	1.92786	LL200+HS:L200	POS	3.807	402.19	C19 H30 O9	Methyl {2-[(2E)-5-(hexopyranosyloxy)-2-penten-1-yl]-3-oxocyclopentyl}acetate	0.00140612	3.49616	NA	level4	ChemSpider	NA	NA	NA	NA	NA	NA	NA	NA	NA	Down	885973	2.13438e+06	2.67559e+06	96923.3	160568	133267	49223.2	52671.7	35605	97544.1	67338.2	33370.6
3.841_438.09421	2.49239	0.0299698	0.156593	1.44348	LL200+HS:L200	POS	3.841	438.094	C17 H19 N4 O8 P	riboflavin cyclic 4',5'-phosphate	0.000160507	0.366376	NA	level4	ChemSpider	NA	NA	NA	NA	NA	NA	NA	NA	NA	Up	1.40879e+06	4.77736e+06	3.99779e+06	1.98433e+07	1.73244e+07	1.29239e+07	3.24337e+07	1.82474e+07	2.80763e+07	2.18564e+07	2.54745e+07	2.41417e+07
3.844_216.09001	0.0255115	0.0281141	0.155067	1.89744	LL200+HS:L200	POS	3.844	216.09	C12 H12 N2 O2	1,2,3,4-Tetrahydro-Î²-carboline-3-carboxylic acid	0.000131836	0.610099	NA	level4	ChemSpider	NA	NA	NA	NA	NA	NA	NA	NA	NA	Down	3.5604e+07	8.84529e+07	4.67691e+08	3.31462e+06	8.50604e+06	6.63689e+06	2.02642e+06	3.47099e+06	3.0595e+06	3.03405e+06	1.93835e+06	2.03795e+06
3.845_172.10019	0.0570538	0.0351916	0.164322	1.63639	LL200+HS:L200	POS	3.845	172.1	C11 H12 N2	Tryptoline	0.000142313	0.826918	NA	level4	ChemSpider	NA	NA	NA	NA	NA	NA	NA	NA	NA	Down	237777	550074	3.48465e+06	49622.5	107496	83867.2	76741.4	28000	42696.7	28835.3	29732.1	51506
3.847_424.18825	0.0364793	0.0108426	0.120248	2.10742	LL200+HS:L200	POS	3.847	424.188	C25 H28 O6	β-mangostin	-0.000338947	-0.799048	NA	level4	ChemSpider	NA	NA	NA	NA	NA	NA	NA	NA	NA	Down	938912	619201	2.77069e+06	98608.7	61159.8	106393	37143.7	23765	27623.8	25032.7	28048.8	26007
3.865_301.14258	0.0156153	0.00603408	0.104113	2.45872	LL200+HS:L200	POS	3.865	301.143	C16 H19 N3 O3	(-)-Febrifugine	-6.15044e-05	-0.204237	NA	level4	ChemSpider	NA	NA	NA	NA	NA	NA	NA	NA	NA	Down	1.77887e+07	2.69177e+07	4.55512e+07	697349	1.09826e+06	2.16857e+06	133462	223565	285919	271715	416069	140575
3.896_341.14745	0.333916	0.00574937	0.103893	1.58604	LL200+HS:L200	POS	3.896	341.147	C17 H19 N5 O3	His-Trp	-0.00133499	-3.91322	NA	level4	ChemSpider	NA	NA	NA	NA	NA	NA	NA	NA	NA	Down	1.5303e+06	1.64321e+06	3.16334e+06	1.55602e+06	1.40754e+06	1.51674e+06	357663	362018	196627	335732	1.6814e+06	678579
4.005_286.13179	0.210347	0.00948197	0.11437	1.63123	LL200+HS:L200	POS	4.005	286.132	C16 H18 N2 O3	Cromakalim	4.32872e-05	0.151284	NA	level4	ChemSpider	NA	NA	NA	NA	NA	NA	NA	NA	NA	Down	2.09901e+06	1.58535e+06	1.79671e+06	380739	315969	588700	506329	120237	412534	51344.9	101737	231128
4.006_212.13151	0.0991533	0.0286837	0.156467	1.60032	LL200+HS:L200	POS	4.006	212.132	C14 H16 N2	Atipamezole	0.000160564	0.756908	NA	level4	ChemSpider	NA	NA	NA	NA	NA	NA	NA	NA	NA	Down	94866.9	81263	1.67899e+06	34100.7	380555	193457	23337.6	106329	21512.4	48295.2	20575.8	24187.6
4.047_156.05366	0.034449	4.37015e-06	0.000637108	2.69619	LL200+HS:L200	POS	4.047	156.054	C6 H8 N2 O3	pentoxyl	0.000167539	1.0736	NA	level4	ChemSpider	NA	NA	NA	NA	NA	NA	NA	NA	NA	Down	524092	2.68553e+06	1.39846e+06	3.69526e+06	2.57584e+06	1.74786e+06	78838.5	44955.4	48606.9	42862.9	43765.8	175959
4.048_349.20015	0.121401	0.0325168	0.159909	1.52566	LL200+HS:L200	POS	4.048	349.2	C18 H27 N3 O4	4-[(2R)-2-(Aminomethyl)-2-(hydroxymethyl)-5-oxo-1-pyrrolidinyl]-3-(3-pentanylamino)benzoic acid	-8.06515e-06	-0.0230961	NA	level4	ChemSpider	NA	NA	NA	NA	NA	NA	NA	NA	NA	Down	1.03253e+06	3.58679e+06	3.25699e+06	153088	248102	334490	180682	219622	65756.8	360282	159309	59857.2
4.093_228.08985	0.288594	0.00522104	0.0996265	1.49998	LL200+HS:L200	POS	4.093	228.09	C13 H12 N2 O2	Ozagrel	-2.59898e-05	-0.113945	NA	level4	ChemSpider	NA	NA	NA	NA	NA	NA	NA	NA	NA	Down	1.20459e+06	2.32369e+06	1.34015e+06	505229	471548	757779	215298	202990	142009	196711	797885	350692
4.094_287.16328	0.303606	0.00564837	0.103893	1.48631	LL200+HS:L200	POS	4.094	287.163	C16 H21 N3 O2	Zolmitriptan	-9.26061e-05	-0.322486	NA	level4	ChemSpider	NA	NA	NA	NA	NA	NA	NA	NA	NA	Down	4.20088e+07	8.23321e+07	5.04756e+07	2.01993e+07	1.74946e+07	2.88448e+07	9.11614e+06	7.19617e+06	5.63441e+06	6.35159e+06	3.12466e+07	1.37321e+07
4.104_264.14735	0.131389	0.0437491	0.174562	1.42129	LL200+HS:L200	POS	4.104	264.147	C14 H20 N2 O3	Vorinostat	-4.40112e-05	-0.166616	NA	level4	ChemSpider	NA	NA	NA	NA	NA	NA	NA	NA	NA	Down	7.6963e+06	2.37642e+07	1.9897e+07	1.70147e+06	1.59965e+06	1.39348e+06	852722	1.34382e+06	789911	1.87667e+06	1.45635e+06	1.0452e+06
4.247_328.14229	0.107899	0.0214289	0.142817	1.64837	LL200+HS:L200	POS	4.247	328.142	C18 H20 N2 O4	Tyr-Phe	-1.9071e-05	-0.058118	NA	level4	ChemSpider	NA	NA	NA	NA	NA	NA	NA	NA	NA	Down	1.38382e+06	2.67831e+06	3.30995e+06	263617	234892	265066	145000	164476	132207	170221	157381	108546
4.256_149.03345	0.166529	0.00170427	0.0584523	1.87943	LL200+HS:L200	POS	4.256	149.033	C5 H11 N S2	ditiocarb	0.000159117	1.06766	NA	level4	ChemSpider	NA	NA	NA	NA	NA	NA	NA	NA	NA	Down	950800	5.87336e+06	1.20605e+06	3.9802e+06	1.18644e+06	1.90699e+06	293070	1.50247e+06	164556	180323	195796	179003
4.333_180.08999	0.320697	0.045963	0.178051	1.12969	LL200+HS:L200	POS	4.333	180.09	C9 H12 N2 O2	(4-Ethoxyphenyl)urea	0.00010887	0.604532	NA	level4	ChemSpider	NA	NA	NA	NA	NA	NA	NA	NA	NA	Down	1.12804e+07	1.44273e+07	7.58721e+07	1.0448e+07	3.15414e+07	5.33712e+07	1.5467e+07	1.0784e+07	1.62667e+07	6.21729e+06	4.79765e+06	9.62554e+06
4.351_183.08968	4.80978	0.00214983	0.0665983	1.67423	LL200+HS:L200	POS	4.351	183.09	C9 H13 N O3	adrenaline	0.00013513	0.738055	NA	level4	ChemSpider	NA	NA	NA	NA	NA	NA	NA	NA	NA	Up	322846	292880	272829	1.07444e+06	621857	604651	1.62104e+06	3.87426e+06	660080	4.31506e+06	3.13342e+06	1.73693e+06
4.351_193.05881	334.31	7.07977e-09	6.45996e-06	3.66204	LL200+HS:L200	POS	4.351	193.059	C6 H11 N O6	Glucuronamide	0.000171259	0.887084	NA	level4	ChemSpider	NA	NA	NA	NA	NA	NA	NA	NA	NA	Up	27484.7	48726.3	44969.7	80179	53657.1	140810	3.92946e+07	3.59003e+07	2.07154e+07	9.37509e+06	1.37817e+07	1.32618e+07
4.353_262.13174	0.196457	0.0172067	0.134609	1.46813	LL200+HS:L200	POS	4.353	262.132	C14 H18 N2 O3	Methohexital	-3.9654e-06	-0.0151275	NA	level4	ChemSpider	NA	NA	NA	NA	NA	NA	NA	NA	NA	Down	3.95254e+07	6.0897e+07	7.64823e+07	1.33277e+07	1.00873e+07	9.10279e+06	8.47576e+06	3.70301e+06	6.35892e+06	8.52545e+06	8.44068e+06	5.63872e+06
4.355_158.02165	232.256	4.10488e-06	0.000624253	3.5861	LL200+HS:L200	POS	4.355	158.022	C6 H6 O5	4-Methylene-2-oxoglutarate	0.00012484	0.790021	NA	level4	ChemSpider	NA	NA	NA	NA	NA	NA	NA	NA	NA	Up	26854.9	119728	83061.6	450904	277222	439873	9.5691e+07	9.95949e+07	4.98951e+07	2.09941e+07	3.05059e+07	2.79301e+07
4.357_154.02672	30.1184	1.17377e-06	0.000228934	2.75758	LL200+HS:L200	POS	4.357	154.027	C7 H6 O4	Protocatechuic acid	0.000106487	0.691355	NA	level4	ChemSpider	NA	NA	NA	NA	NA	NA	NA	NA	NA	Up	25600.8	77405.4	57468.6	41768.4	81544	47901.5	2.7075e+06	2.99706e+06	1.4989e+06	662587	1.0875e+06	1.03639e+06
4.357_176.03220	232.36	4.37984e-06	0.000637108	3.58708	LL200+HS:L200	POS	4.357	176.032	C6 H8 O6	Vitamin C	0.000115792	0.657789	NA	level4	ChemSpider	NA	NA	NA	NA	NA	NA	NA	NA	NA	Up	26228.9	119728	83061.6	450904	277222	439873	9.5691e+07	9.95949e+07	4.98951e+07	2.09941e+07	3.05059e+07	2.79301e+07
4.358_223.12088	0.01673	4.07899e-09	5.84869e-06	3.05027	LL200+HS:L200	POS	4.358	223.121	C12 H17 N O3	DL-Cerulenin	3.86293e-05	0.173132	NA	level4	ChemSpider	NA	NA	NA	NA	NA	NA	NA	NA	NA	Down	1.91921e+06	4.06899e+06	4.50521e+06	5.2666e+06	3.52046e+06	2.8305e+06	82774.2	79374.5	60660.8	49331.5	48499	49275.8
4.367_301.18892	3.63182	0.000214942	0.0156858	1.65063	LL200+HS:L200	POS	4.367	301.189	C16 H23 N5 O	Tegaserod	-0.00133597	-4.43564	NA	level4	ChemSpider	NA	NA	NA	NA	NA	NA	NA	NA	NA	Up	1.20423e+06	2.06469e+06	1.32842e+06	1.39931e+06	1.11413e+06	1.18193e+06	6.21937e+06	4.4566e+06	7.59683e+06	3.46975e+06	2.51203e+06	5.86303e+06
4.438_128.02234	0.043715	3.86431e-05	0.00387861	2.70302	LL200+HS:L200	POS	4.438	128.022	C4 H4 N2 O3	Barbituric acid	0.00014876	1.16198	NA	level4	ChemSpider	NA	NA	NA	NA	NA	NA	NA	NA	NA	Down	800623	1.14318e+06	1.07201e+06	2.69816e+06	1.8077e+06	1.72653e+06	150817	94249.7	20560.5	49563.7	70882.4	18211.8
4.441_270.12161	0.00990766	5.07034e-07	0.000127228	3.22777	LL200+HS:L200	POS	4.441	270.122	C12 H18 N2 O5	EPERVUDINE	3.90071e-05	0.144406	NA	level4	ChemSpider	NA	NA	NA	NA	NA	NA	NA	NA	NA	Down	1.23462e+06	3.36013e+06	2.34602e+06	5.04777e+06	3.15674e+06	3.04492e+06	32987.3	26697	30401.8	25616.2	37591.1	26929
4.442_238.09542	0.0209754	1.56805e-07	5.82907e-05	2.92777	LL200+HS:L200	POS	4.442	238.095	C11 H14 N2 O4	felbamate	6.52096e-05	0.27388	NA	level4	ChemSpider	NA	NA	NA	NA	NA	NA	NA	NA	NA	Down	5.67489e+06	1.85113e+07	1.17093e+07	2.56348e+07	1.62691e+07	1.5975e+07	197139	421856	305139	319067	235509	488242
4.442_355.15318	0.344308	0.0143082	0.128229	1.44466	LL200+HS:L200	POS	4.442	355.153	C14 H23 N6 O3 S	S-Adenosylmethioninamine	-0.00205126	-5.77566	NA	level4	ChemSpider	NA	NA	NA	NA	NA	NA	NA	NA	NA	Down	803880	1.46639e+06	1.15989e+06	770090	360390	1.39287e+06	713756	248512	140031	87662.5	170285	689594
4.455_296.11943	0.0403374	0.0355646	0.164578	1.80444	LL200+HS:L200	POS	4.455	296.119	C14 H20 N2 O3 S	glycyclamide	-3.29129e-05	-0.111147	NA	level4	ChemSpider	NA	NA	NA	NA	NA	NA	NA	NA	NA	Down	2.3095e+06	3.63774e+06	7.53575e+06	156937	156736	137551	117865	102215	81764	101081	100264	58881.5
4.459_339.17937	0.113	0.00254973	0.0728317	1.90935	LL200+HS:L200	POS	4.459	339.179	C16 H25 N3 O5	Xamoterol [USAN:BAN:INN]	-5.18722e-05	-0.152934	NA	level4	ChemSpider	NA	NA	NA	NA	NA	NA	NA	NA	NA	Down	773970	1.42367e+06	674813	220643	94388.4	417794	72600	120958	30036.8	83033.8	27620	73147.8
4.484_227.15218	0.0230439	0.0350737	0.164322	1.95243	LL200+HS:L200	POS	4.484	227.152	C12 H21 N O3	C8-HSL	3.54469e-05	0.156049	NA	level4	ChemSpider	NA	NA	NA	NA	NA	NA	NA	NA	NA	Down	3.52458e+07	4.03333e+07	9.49815e+07	1.13477e+06	1.08128e+06	1.21084e+06	507128	694135	522164	877757	882291	525868
4.486_244.17870	0.0230439	0.0350737	0.164322	1.95243	LL200+HS:L200	POS	4.486	244.179	C12 H24 N2 O3	Leu-Leu	4.89565e-06	0.0200495	NA	level4	ChemSpider	NA	NA	NA	NA	NA	NA	NA	NA	NA	Down	3.52458e+07	4.03333e+07	9.49815e+07	1.13477e+06	1.08128e+06	1.21084e+06	507128	694135	522164	877757	882291	525868
4.564_390.15395	0.047127	0.0459893	0.178084	1.69631	LL200+HS:L200	POS	4.564	390.154	C17 H26 O10	Loganin	0.00135096	3.46263	NA	level4	ChemSpider	NA	NA	NA	NA	NA	NA	NA	NA	NA	Down	539548	1.45947e+06	876357	34353.3	30668.7	31738.8	27155	19394.6	24433.8	22068.2	24588	22428.1
4.571_224.11615	0.0179292	1.23457e-05	0.00147516	3.05849	LL200+HS:L200	POS	4.571	224.116	C11 H16 N2 O3	butalbital	5.79424e-05	0.258538	NA	level4	ChemSpider	NA	NA	NA	NA	NA	NA	NA	NA	NA	Down	2.32334e+07	3.26259e+07	4.16386e+07	6.95169e+07	5.23515e+07	4.96079e+07	1.37062e+06	860987	1.26904e+06	235438	193138	893278
4.732_317.17392	0.0263635	0.0164551	0.133086	2.11783	LL200+HS:L200	POS	4.732	317.174	C17 H23 N3 O3	Leucyltryptophan	-2.56368e-05	-0.0808288	NA	level4	ChemSpider	NA	NA	NA	NA	NA	NA	NA	NA	NA	Down	8.28148e+06	1.19038e+07	5.39825e+06	240410	268792	349997	57146.7	107110	93411.8	193392	158855	87207.4
4.796_280.08801	0.0318473	0.016301	0.132587	1.90998	LL200+HS:L200	POS	4.796	280.088	C13 H16 N2 O3 S	5-{4-[2-(Methylamino)ethoxy]benzyl}-1,3-thiazolidine-2,4-dione	-0.000156597	-0.559098	NA	level4	ChemSpider	NA	NA	NA	NA	NA	NA	NA	NA	NA	Down	348193	851912	1.13803e+07	123971	391452	307901	31371	66758.9	116860	65097.3	85221.8	61563
4.839_298.15184	0.0277108	0.0121983	0.124583	2.23236	LL200+HS:L200	POS	4.839	298.152	C18 H22 N2 S	Alimemazine	0.00146859	4.92566	NA	level4	ChemSpider	NA	NA	NA	NA	NA	NA	NA	NA	NA	Down	3.32709e+06	1.36584e+06	1.43866e+06	52774.5	64401.3	429408	34731.1	28764.8	30875.7	29476.1	31188.4	30021.4
4.901_278.16230	0.0287362	0.0299037	0.156593	1.95581	LL200+HS:L200	POS	4.901	278.162	C15 H22 N2 O3	Ro 20-1724	-0.000744686	-2.67716	NA	level4	ChemSpider	NA	NA	NA	NA	NA	NA	NA	NA	NA	Down	3.05315e+07	3.32312e+07	1.68603e+07	712825	629029	680396	181851	514950	330396	610432	501976	235309
5.002_312.14738	0.0372664	0.0296645	0.156593	1.88321	LL200+HS:L200	POS	5.002	312.147	C18 H20 N2 O3	MFCD00020424	-1.45343e-05	-0.0465624	NA	level4	ChemSpider	NA	NA	NA	NA	NA	NA	NA	NA	NA	Down	6.43718e+06	7.84246e+06	1.504e+07	353633	301492	344940	175094	219116	168990	246527	200552	119627
5.092_165.02497	0.116771	0.0495411	0.183147	1.50623	LL200+HS:L200	POS	5.092	165.025	C8 H7 N O S	4-(Isothiocyanatomethyl)phenol	0.000130681	0.791889	NA	level4	ChemSpider	NA	NA	NA	NA	NA	NA	NA	NA	NA	Down	1.17295e+06	442990	762078	28439.5	62826.6	107022	98874	28320.2	84356.6	37004.2	26715.1	25567.9
5.412_229.11035	0.281934	0.0094146	0.113849	1.51929	LL200+HS:L200	POS	5.412	229.11	C9 H16 Cl N5	propazine	0.000924926	4.03705	NA	level4	ChemSpider	NA	NA	NA	NA	NA	NA	NA	NA	NA	Down	3.06397e+07	1.04005e+07	1.60513e+07	6.03348e+06	4.74122e+06	9.349e+06	9.56968e+06	1.86031e+06	4.86849e+06	1.20901e+06	2.16265e+06	2.09945e+06
5.417_275.11578	0.28913	0.0118243	0.123883	1.48935	LL200+HS:L200	POS	5.417	275.116	C15 H17 N O4	Dubinidine	1.83539e-05	0.0667134	NA	level4	ChemSpider	NA	NA	NA	NA	NA	NA	NA	NA	NA	Down	2.31971e+07	7.33306e+06	1.22173e+07	4.38349e+06	3.3499e+06	6.90287e+06	7.61019e+06	1.44046e+06	3.49864e+06	927574	1.57035e+06	1.54411e+06
5.644_395.27852	0.152173	0.0295088	0.156593	1.50868	LL200+HS:L200	POS	5.644	395.279	C19 H42 N O5 P	Sphingosine 1-phosphate (d19:1-P)	-0.00153927	-3.89413	NA	level4	ChemSpider	NA	NA	NA	NA	NA	NA	NA	NA	NA	Down	609316	771899	1.50561e+06	53000.4	120934	324855	109164	46496.7	158692	44892.4	32935	123020
5.729_287.20967	4.41846	0.00472164	0.0964871	1.66449	LL200+HS:L200	POS	5.729	287.21	C15 H29 N O4	5955761	1.45629e-05	0.0507047	NA	level4	ChemSpider	NA	NA	NA	NA	NA	NA	NA	NA	NA	Up	67193.2	45707.4	247246	195157	283813	265306	224929	1.03027e+06	1.06015e+06	1.30591e+06	432814	825773
5.86_179.04062	0.128677	0.0271601	0.153487	1.5965	LL200+HS:L200	POS	5.86	179.041	C9 H9 N O S	p-methoxybenzylisothiocyanate	0.000136768	0.763896	NA	level4	ChemSpider	NA	NA	NA	NA	NA	NA	NA	NA	NA	Down	1.74554e+06	967528	1.42145e+06	76554.1	148321	266225	184943	68113.8	154680	67485.9	72086.6	47903.1
5.991_140.01110	0.0375327	1.34104e-06	0.000240358	2.72678	LL200+HS:L200	POS	5.991	140.011	C6 H4 O4	5-Formyl-2-furoic acid	0.000141846	1.01311	NA	level4	ChemSpider	NA	NA	NA	NA	NA	NA	NA	NA	NA	Down	866278	1.59904e+06	1.90783e+06	3.01486e+06	3.36534e+06	2.59297e+06	43957.5	200269	43234	102789	51262.7	59410.9
6.088_289.13481	0.471742	0.0201538	0.139602	1.02602	LL200+HS:L200	POS	6.088	289.135	C16 H20 Cl N3	chloropyramine	0.000237914	0.822848	NA	level4	ChemSpider	NA	NA	NA	NA	NA	NA	NA	NA	NA	Down	402137	1.67834e+06	775712	682727	776264	939143	654612	192260	640670	379960	345135	266046
6.191_230.06115	0.178549	0.00736647	0.10905	1.79515	LL200+HS:L200	NEG	6.191	230.061	C10 H14 O4 S	thymol sulfate	-0.000124763	-0.542305	NA	level4	ChemSpider	NA	NA	NA	NA	NA	NA	NA	NA	NA	Down	1.11512e+06	416804	2.91804e+06	763595	2.64571e+06	1.67016e+06	531270	341919	507366	133014	28875.6	159026
6.492_344.22017	0.141337	0.00632764	0.104113	1.76703	LL200+HS:L200	NEG	6.492	344.22	C18 H32 O6	ascr#19	0.000278695	0.809642	NA	level4	ChemSpider	NA	NA	NA	NA	NA	NA	NA	NA	NA	Down	1.17318e+06	127936	183685	125835	92527.3	130751	15004.2	77351.2	22784.8	98342.8	13901.1	31815.6
6.516_330.08785	0.0209246	2.99634e-06	0.000485069	2.96341	LL200+HS:L200	POS	6.516	330.088	C13 H18 N2 O6 S	5-{(1E)-3-[(4-Aminobutyl)amino]-3-oxo-1-propen-1-yl}-2-hydroxyphenyl hydrogen sulfate	-0.000710415	-2.1522	NA	level4	ChemSpider	NA	NA	NA	NA	NA	NA	NA	NA	NA	Down	1.09666e+06	1.00198e+06	1.40217e+06	2.76494e+06	2.1883e+06	2.49184e+06	42217.8	35412.1	39102.4	35551.2	38493.1	38261.6
6.516_344.10348	0.00825311	8.74475e-07	0.000182865	3.31576	LL200+HS:L200	POS	6.516	344.103	C22 H16 O4	10,10-Dimethyl-5-phenylfuro[2,3-h]pyrano[3,2-f]chromen-7(10H)-one	-0.00138172	-4.0154	NA	level4	ChemSpider	NA	NA	NA	NA	NA	NA	NA	NA	NA	Down	2.59857e+06	2.19744e+06	3.23248e+06	6.12595e+06	4.9032e+06	5.69147e+06	37650	31580.7	34871.7	31704.7	34328.3	34121.9
6.517_361.10629	0.00601754	7.0778e-07	0.000165209	3.42292	LL200+HS:L200	POS	6.517	361.106	C19 H20 Cl N O4	Bezafibrate	-0.00179477	-4.97016	NA	level4	ChemSpider	NA	NA	NA	NA	NA	NA	NA	NA	NA	Down	3.26021e+06	3.06384e+06	4.36737e+06	8.22135e+06	6.58242e+06	7.86839e+06	37006.6	31041	34275.8	31162.9	33741.7	33538.8
6.523_183.12601	0.00429095	1.09513e-06	0.000219836	3.52963	LL200+HS:L200	NEG	6.523	183.126	C10 H17 N O2	methyprylon	7.81711e-05	0.426871	NA	level4	ChemSpider	NA	NA	NA	NA	NA	NA	NA	NA	NA	Down	945391	549474	1.14636e+06	2.26649e+06	1.50815e+06	2.08164e+06	7004.42	5184.6	6405.47	5768.13	5996.58	6103.23
6.524_226.13168	0.00153013	8.88511e-10	2.2295e-06	3.86541	LL200+HS:L200	NEG	6.524	226.132	C11 H18 N2 O3	pentobarbital	-6.24382e-05	-0.276114	NA	level4	ChemSpider	NA	NA	NA	NA	NA	NA	NA	NA	NA	Down	2.70979e+08	1.61005e+08	3.31927e+08	6.23945e+08	4.32868e+08	6.20571e+08	626323	995830	816063	524280	310654	462341
6.524_256.16728	0.322119	4.20848e-07	0.000108309	1.58005	LL200+HS:L200	NEG	6.524	256.167	C14 H24 O4	4-[(2-Isopropyl-5-methylcyclohexyl)oxy]-4-oxobutanoic acid	-0.000178822	-0.698065	NA	level4	ChemSpider	NA	NA	NA	NA	NA	NA	NA	NA	NA	Down	1.96578e+06	2.7538e+06	3.23069e+06	3.11797e+06	2.74209e+06	2.76271e+06	730354	926237	778872	1.14636e+06	821454	935203
6.58_368.17698	0.140496	0.00634657	0.104113	1.87068	LL200+HS:L200	POS	6.58	368.177	C20 H29 Cl O4	arildone	0.0015426	4.18985	NA	level4	ChemSpider	NA	NA	NA	NA	NA	NA	NA	NA	NA	Down	426801	2.344e+06	1.76622e+06	175333	320694	851492	388427	46327.6	283742	39122.4	31355.3	37779.5
6.648_394.23582	0.10856	0.00509613	0.0982909	1.8498	LL200+HS:L200	NEG	6.648	394.236	C22 H34 O6	1-(3,4-Dimethoxyphenyl)-3,5-decanediyl diacetate	0.000284153	0.720769	NA	level4	ChemSpider	NA	NA	NA	NA	NA	NA	NA	NA	NA	Down	4.83553e+06	483652	522360	509364	374539	529263	70591.9	194440	148020	147611	130218	96686.5
6.661_200.15262	0.181288	0.0287714	0.156535	1.46178	LL200+HS:L200	POS	6.661	200.153	C10 H20 N2 O2	HMBA	0.000144079	0.719845	NA	level4	ChemSpider	NA	NA	NA	NA	NA	NA	NA	NA	NA	Down	2.15214e+06	587496	841486	103316	238827	292916	173169	90613.5	204683	95253.9	99716.8	100905
6.74_143.13121	1.93576	0.0203597	0.139709	1.09378	LL200+HS:L200	POS	6.74	143.131	C8 H17 N O	Valpromide	0.00019456	1.35931	NA	level4	ChemSpider	NA	NA	NA	NA	NA	NA	NA	NA	NA	Up	3.63492e+06	5.82497e+06	5.73978e+06	1.60889e+07	1.21324e+07	8.1996e+06	1.51792e+07	1.8443e+07	8.53884e+06	2.16631e+07	1.79721e+07	1.81287e+07
6.761_412.19230	6.83327	0.00800487	0.1105	1.69631	LL200+HS:L200	NEG	6.761	412.192	C21 H32 O6 S	17-Hydroxypregnenolone sulfate	0.000345446	0.838071	NA	level4	ChemSpider	NA	NA	NA	NA	NA	NA	NA	NA	NA	Up	7668.48	6404.52	11979	13263.7	10913.8	6451.43	149563	9316.57	38325.5	31083.9	99972.5	59054.5
6.933_370.23589	0.331657	0.0348746	0.164322	1.18473	LL200+HS:L200	NEG	6.933	370.236	C20 H34 O6	TxB2	0.00035217	0.951205	NA	level4	ChemSpider	NA	NA	NA	NA	NA	NA	NA	NA	NA	Down	1.73807e+06	760953	656871	201821	259928	520353	237574	391893	255998	210962	141424	134543
6.95_381.12806	0.252757	0.0144286	0.128229	1.64628	LL200+HS:L200	POS	6.95	381.128	C14 H23 N O11	(6R)-5-Acetamido-3,5-dideoxy-6-[(1R,2R)-1,2-dihydroxy-3-(lactoyloxy)propyl]-alpha-L-threo-hex-2-ulopyranosonic acid	0.000945335	2.48037	NA	level4	ChemSpider	NA	NA	NA	NA	NA	NA	NA	NA	NA	Down	274885	1.56055e+06	1.11294e+06	2.40991e+06	989144	923189	255035	978963	51053.3	47247.2	225138	280259
6.984_477.21471	2.38111	0.0264702	0.152383	1.15117	LL200+HS:L200	POS	6.984	477.215	C28 H31 N O6	(+)-Spectinabilin	-0.000429297	-0.899587	NA	level4	ChemSpider	NA	NA	NA	NA	NA	NA	NA	NA	NA	Up	258977	724940	319845	1.11563e+06	473819	633386	615655	933429	1.23871e+06	1.19801e+06	1.02773e+06	3.38366e+06
7.079_226.12061	2.21956	0.028817	0.156593	1.08647	LL200+HS:L200	POS	7.079	226.121	C12 H18 O4	Butopyronoxyl	0.000103397	0.457265	NA	level4	ChemSpider	NA	NA	NA	NA	NA	NA	NA	NA	NA	Up	4.2946e+06	2.5118e+06	2.68131e+06	2.77874e+06	1.33352e+06	1.23961e+06	7.71417e+06	7.83992e+06	5.67197e+06	6.09608e+06	1.73957e+06	3.87563e+06
7.08_120.09400	1.95071	0.00568706	0.103893	1.0862	LL200+HS:L200	POS	7.08	120.094	C9 H12	Cumene	9.81009e-05	0.816868	NA	level4	ChemSpider	NA	NA	NA	NA	NA	NA	NA	NA	NA	Up	1.14752e+07	9.65403e+06	9.10408e+06	1.06525e+07	7.373e+06	6.81188e+06	2.24242e+07	2.25453e+07	1.7846e+07	1.99254e+07	8.57211e+06	1.61139e+07
7.103_354.24085	0.267971	0.0354497	0.164346	1.25958	LL200+HS:L200	NEG	7.103	354.241	C20 H34 O5	(-)-Prostaglandin E1	0.000222074	0.626902	NA	level4	ChemSpider	NA	NA	NA	NA	NA	NA	NA	NA	NA	Down	3.81593e+06	1.30855e+06	1.13753e+06	392406	428473	542694	310312	548603	331538	359343	251677	241959
7.133_288.15726	0.0218623	5.47765e-05	0.00509067	2.85565	LL200+HS:L200	POS	7.133	288.157	C14 H24 O6	ascr#13	-2.60683e-05	-0.0904656	NA	level4	ChemSpider	NA	NA	NA	NA	NA	NA	NA	NA	NA	Down	522265	889162	1.89263e+06	3.55819e+06	2.71147e+06	1.48643e+06	44005.7	40437.6	37424.2	39672.6	40349.2	39911.6
7.399_268.07125	1.9686	0.00759307	0.10905	1.05018	LL200+HS:L200	POS	7.399	268.071	C9 H17 O7 P	2-Oxo-3-(phosphonooxy)propyl hexanoate	5.5798e-05	0.208146	NA	level4	ChemSpider	NA	NA	NA	NA	NA	NA	NA	NA	NA	Up	299270	298253	354002	663964	590180	409014	1.04992e+06	592294	785534	551758	1.41955e+06	748207
7.425_392.21817	0.209094	0.0480353	0.181461	1.28545	LL200+HS:L200	POS	7.425	392.218	C22 H32 O6	Isodomedin	-0.00171544	-4.37368	NA	level4	ChemSpider	NA	NA	NA	NA	NA	NA	NA	NA	NA	Down	1.45362e+07	3.3151e+06	1.99806e+06	1.00449e+06	1.1878e+06	1.23246e+06	773026	1.27919e+06	678094	832577	597331	706245
7.58_583.27964	1.98321	0.0342466	0.162912	1.11346	LL200+HS:L200	NEG	7.58	583.28	C21 H41 N7 O12	Dihydrostreptomycin	-0.00167881	-2.87822	NA	level4	ChemSpider	NA	NA	NA	NA	NA	NA	NA	NA	NA	Up	515032	1.53405e+06	1.82298e+06	3.04455e+06	2.7886e+06	2.33577e+06	2.1305e+06	2.92891e+06	5.01706e+06	4.86527e+06	4.93312e+06	4.00498e+06
7.673_288.23009	0.307218	0.00859185	0.111935	1.3943	LL200+HS:L200	NEG	7.673	288.23	C16 H32 O4	10,16-Dihydroxyhexadecanoic acid	2.61079e-05	0.09058	NA	level4	ChemSpider	NA	NA	NA	NA	NA	NA	NA	NA	NA	Down	1.89305e+06	434068	1.02562e+06	413902	775818	403313	161372	250722	298161	276938	272957	259279
7.691_245.14545	0.393277	0.0414388	0.171655	1.05115	LL200+HS:L200	POS	7.691	245.145	C12 H23 N O2 S	S-3-oxodecanoyl cysteamine	0.000496556	2.02556	NA	level4	ChemSpider	NA	NA	NA	NA	NA	NA	NA	NA	NA	Down	3.67232e+06	3.06633e+07	1.75805e+07	1.35743e+07	1.40607e+07	1.8613e+07	9.60637e+06	1.93215e+06	1.06478e+07	5.88297e+06	5.5102e+06	5.02611e+06
7.769_281.27193	1.87713	0.00444007	0.093722	1.14201	LL200+HS:L200	POS	7.769	281.272	C18 H35 N O	(9Z)-9-Octadecenamide	6.40423e-05	0.227688	NA	level4	ChemSpider	NA	NA	NA	NA	NA	NA	NA	NA	NA	Up	987636	1.67123e+06	1.73493e+06	2.46015e+06	2.31871e+06	2.53678e+06	3.93022e+06	4.29256e+06	3.06093e+06	3.87447e+06	3.69214e+06	3.12976e+06
7.816_141.15192	0.397158	0.021411	0.142792	1.22941	LL200+HS:L200	POS	7.816	141.152	C9 H19 N	isometheptene	0.000171223	1.21304	NA	level4	ChemSpider	NA	NA	NA	NA	NA	NA	NA	NA	NA	Down	3.13897e+06	3.59799e+06	5.69855e+06	1.20137e+06	2.2539e+06	2.11041e+06	1.58981e+06	541359	1.65402e+06	353971	1.16259e+06	1.84758e+06
7.888_110.10964	0.291054	0.00126785	0.0489438	1.51558	LL200+HS:L200	POS	7.888	110.11	C8 H14	1733342	8.95256e-05	0.81306	NA	level4	ChemSpider	NA	NA	NA	NA	NA	NA	NA	NA	NA	Down	5.06552e+06	5.79742e+06	1.02365e+07	1.50482e+07	1.57762e+07	1.27917e+07	3.52921e+06	2.54038e+06	3.93754e+06	3.04928e+06	2.39946e+06	3.37991e+06
7.89_184.14650	0.012577	3.95834e-07	0.00010772	3.19545	LL200+HS:L200	POS	7.89	184.147	C11 H20 O2	10-Undecenoic acid	0.000170815	0.927603	NA	level4	ChemSpider	NA	NA	NA	NA	NA	NA	NA	NA	NA	Down	9.45778e+07	5.85272e+07	1.96517e+08	2.68101e+08	2.78715e+08	2.49442e+08	2.36046e+06	1.57772e+06	1.5233e+06	837978	6.40205e+06	1.71021e+06
7.891_230.15189	0.0107426	1.8616e-07	6.34733e-05	3.19329	LL200+HS:L200	POS	7.891	230.152	C12 H22 O4	Dodecanedioic acid	7.90021e-05	0.343261	NA	level4	ChemSpider	NA	NA	NA	NA	NA	NA	NA	NA	NA	Down	2.05574e+07	1.532e+07	4.51316e+07	6.68233e+07	6.89131e+07	6.05199e+07	972910	411781	498015	408328	190020	497500
7.892_244.16751	0.0205067	1.74676e-05	0.0019923	2.93093	LL200+HS:L200	POS	7.892	244.168	C13 H24 O4	Brassylic acid	5.52284e-05	0.226191	NA	level4	ChemSpider	NA	NA	NA	NA	NA	NA	NA	NA	NA	Down	4.26448e+06	2.83351e+06	8.80024e+06	1.26636e+07	1.26009e+07	1.20812e+07	210293	181401	165426	205853	183211	145675
7.892_330.07677	0.137639	0.000801382	0.0363958	1.98055	LL200+HS:L200	POS	7.892	330.077	C14 H18 O7 S	2-Hydroxy-3-[3-(3-methyl-2-buten-1-yl)-4-(sulfooxy)phenyl]propanoic acid	-0.000556721	-1.68664	NA	level4	ChemSpider	NA	NA	NA	NA	NA	NA	NA	NA	NA	Down	627236	391375	1.25829e+06	1.8775e+06	1.95907e+06	1.64516e+06	206334	177987	162312	201979	179762	139516
8.118_168.07877	1.82987	0.0102706	0.118375	1.13064	LL200+HS:L200	POS	8.118	168.079	C9 H12 O3	DC2810000	0.000122723	0.730154	NA	level4	ChemSpider	NA	NA	NA	NA	NA	NA	NA	NA	NA	Up	1.77661e+06	3.729e+06	3.25382e+06	1.73769e+06	4.00977e+06	1.62541e+06	5.80943e+06	4.43788e+06	5.20709e+06	4.63946e+06	4.62634e+06	4.79988e+06
8.13_399.22581	0.250323	0.0139845	0.128102	1.40021	LL200+HS:L200	NEG	8.13	399.226	C20 H33 N O7	4-[({1-[2-Carboxy-3-(2-methoxyethoxy)propyl]cyclopentyl}carbonyl)amino]cyclohexanecarboxylic acid	0.000110817	0.27758	NA	level4	ChemSpider	NA	NA	NA	NA	NA	NA	NA	NA	NA	Down	470446	287946	195831	77812.4	82760.8	68793.6	52691.2	61192.6	74620.1	38226.1	27899.4	41649.9
8.164_380.25656	0.351322	0.00595443	0.103893	1.25609	LL200+HS:L200	NEG	8.164	380.257	C22 H36 O5	Limaprost	0.000281084	0.739197	NA	level4	ChemSpider	NA	NA	NA	NA	NA	NA	NA	NA	NA	Down	6.2266e+06	1.51251e+07	6.31952e+06	5.24795e+06	4.65217e+06	2.86949e+06	1.85956e+06	3.48304e+06	3.14939e+06	2.18065e+06	1.61769e+06	1.91743e+06
8.166_477.31459	130.156	0.0121171	0.124379	2.44259	LL200+HS:L200	POS	8.166	477.315	C21 H43 N5 O7	4,6-Diamino-3-({3-amino-6-[1-(methylamino)ethyl]tetrahydro-2H-pyran-2-yl}oxy)-2-hydroxycyclohexyl 3-deoxy-4-C-methyl-3-(methylamino)pentopyranoside	-0.00165673	-3.47093	NA	level4	ChemSpider	NA	NA	NA	NA	NA	NA	NA	NA	NA	Up	75393.7	96307.7	72531.9	156321	177248	160694	233744	5.63897e+06	8.29408e+07	5.3164e+06	608151	1.38153e+06
8.171_260.17766	0.421078	0.01698	0.134196	1.17886	LL200+HS:L200	POS	8.171	260.178	C17 H24 O2	1,9-heptadecadien-4,6-diyn-3,8-diol	3.11984e-05	0.119912	NA	level4	ChemSpider	NA	NA	NA	NA	NA	NA	NA	NA	NA	Down	1.1214e+07	2.12554e+06	4.49712e+06	4.34308e+06	3.48975e+06	4.9267e+06	1.76622e+06	3.06028e+06	1.70557e+06	2.24849e+06	2.37433e+06	1.72849e+06
8.336_395.30361	3.03312	0.00760226	0.10905	1.52741	LL200+HS:L200	POS	8.336	395.304	C23 H41 N O4	9,12-Hexadecadienoylcarnitine	4.73084e-05	0.119676	NA	level4	ChemSpider	NA	NA	NA	NA	NA	NA	NA	NA	NA	Up	76019.4	207485	77531.8	489813	257155	310203	706189	1.16464e+06	648990	666508	334924	780352
8.369_386.28209	0.0616619	0.030019	0.156593	1.70559	LL200+HS:L200	POS	8.369	386.282	C25 H38 O3	Testosterone isocaproate	-3.89422e-06	-0.0100813	NA	level4	ChemSpider	NA	NA	NA	NA	NA	NA	NA	NA	NA	Down	60062.2	452776	2.18781e+06	260518	978463	35674.5	43376.3	38394.4	39055.3	40491.9	36784.6	47022.4
8.381_316.26148	0.453657	0.0125075	0.124887	1.1488	LL200+HS:L200	NEG	8.381	316.261	C18 H36 O4	9,10-Dihydroxystearic acid	0.000121831	0.385222	NA	level4	ChemSpider	NA	NA	NA	NA	NA	NA	NA	NA	NA	Down	5.31662e+06	1.82351e+06	3.091e+06	1.90826e+06	3.66326e+06	1.65235e+06	1.0329e+06	1.52177e+06	1.34691e+06	1.29011e+06	1.45431e+06	1.27259e+06
8.393_364.26155	0.334253	0.0102138	0.118106	1.31265	LL200+HS:L200	NEG	8.393	364.262	C22 H36 O4	(5Z,13E,15R)-15-Hydroxy-16,16-dimethyl-9-oxoprosta-5,13-dien-1-oic acid	0.00019157	0.525913	NA	level4	ChemSpider	NA	NA	NA	NA	NA	NA	NA	NA	NA	Down	1.953e+06	903059	603898	469948	442755	397794	234156	349163	290993	225506	311991	182729
8.407_316.24219	2.37528	0.0274411	0.153875	1.25316	LL200+HS:L200	NEG	8.407	316.242	C18 H36 O2 S	18-Sulfanyloctadecanoic acid	-0.00141268	-4.46706	NA	level4	ChemSpider	NA	NA	NA	NA	NA	NA	NA	NA	NA	Up	435114	2.2793e+06	772068	1.8128e+06	445786	870705	4.72849e+06	2.53576e+06	3.90725e+06	1.91021e+06	1.14028e+06	1.49233e+06
8.443_268.20392	0.370532	0.0279859	0.154933	1.30264	LL200+HS:L200	POS	8.443	268.204	C16 H28 O3	(2S)-3-{[(1Z)-11-Methyl-1-dodecen-3-yn-1-yl]oxy}-1,2-propanediol	7.52487e-05	0.280565	NA	level4	ChemSpider	NA	NA	NA	NA	NA	NA	NA	NA	NA	Down	1.65989e+07	3.60345e+06	1.72435e+07	9.49738e+06	2.07182e+07	1.88168e+07	1.33328e+06	4.16094e+06	2.73712e+06	6.23112e+06	1.03747e+07	7.20585e+06
8.443_439.32997	4.37933	0.0121137	0.124379	1.55321	LL200+HS:L200	POS	8.443	439.33	C25 H45 N O5	3-hydroxylinoleoylcarnitine	0.000197384	0.449285	NA	level4	ChemSpider	NA	NA	NA	NA	NA	NA	NA	NA	NA	Up	1.26569e+06	3.20459e+06	2.94655e+06	781693	746634	854377	1.04879e+07	1.16772e+07	1.71245e+06	7.44261e+06	1.84913e+06	9.74602e+06
8.491_463.32990	2.23463	0.0362816	0.164963	1.15391	LL200+HS:L200	POS	8.491	463.33	C27 H45 N O5	3-hydroxyarachidonoylcarnitine	0.000124216	0.268094	NA	level4	ChemSpider	NA	NA	NA	NA	NA	NA	NA	NA	NA	Up	380936	1.92068e+06	1.15938e+06	1.08531e+06	1.3369e+06	514378	3.71584e+06	3.94759e+06	1.97485e+06	2.01201e+06	838187	1.80774e+06
8.503_269.19923	0.218449	0.0035332	0.0811504	1.71235	LL200+HS:L200	POS	8.503	269.199	C15 H27 N O3	Ethyl N-[(2-isopropyl-5-methylcyclohexyl)carbonyl]glycinate	0.000135411	0.503014	NA	level4	ChemSpider	NA	NA	NA	NA	NA	NA	NA	NA	NA	Down	2.59931e+06	2.20807e+06	3.76207e+06	674709	1.22183e+06	3.18452e+06	990387	342118	848633	139340	177417	484044
8.61_398.31901	1.84301	0.0294737	0.156593	1.0129	LL200+HS:L200	POS	8.61	398.319	C27 H42 O2	calicoferol E	0.000527109	1.32334	NA	level4	ChemSpider	NA	NA	NA	NA	NA	NA	NA	NA	NA	Up	794848	344345	1.32554e+06	1.31117e+06	1.7752e+06	1.04083e+06	2.81955e+06	1.84914e+06	1.46716e+06	2.27181e+06	2.05455e+06	1.6868e+06
8.637_322.21416	0.352202	0.0195931	0.13869	1.27369	LL200+HS:L200	POS	8.637	322.214	C19 H30 O4	Decylubiquinone	-0.000248562	-0.771417	NA	level4	ChemSpider	NA	NA	NA	NA	NA	NA	NA	NA	NA	Down	3.51495e+06	796706	4.49852e+06	1.05152e+06	2.63081e+06	1.86444e+06	577117	455706	781933	779989	1.47571e+06	986095
8.688_329.32930	1.89447	0.0170512	0.134302	1.04636	LL200+HS:L200	POS	8.688	329.329	C20 H43 N O2	(2S,3S)-2-(Dimethylamino)-1,3-octadecanediol	-7.93463e-05	-0.240933	NA	level4	ChemSpider	NA	NA	NA	NA	NA	NA	NA	NA	NA	Up	1.52311e+06	877259	1.63273e+06	3.29669e+06	2.39515e+06	3.05985e+06	5.98449e+06	2.73448e+06	4.60376e+06	3.32888e+06	3.74211e+06	3.8267e+06
8.69_413.32912	0.326586	0.0057458	0.103893	1.58629	LL200+HS:L200	POS	8.69	413.329	C27 H43 N O2	Solasodine	-0.000260856	-0.63111	NA	level4	ChemSpider	NA	NA	NA	NA	NA	NA	NA	NA	NA	Down	809497	632550	684347	657760	749976	653770	304442	430684	228685	58067.5	190225	155607
8.703_447.33495	2.82915	0.0312179	0.15801	1.60987	LL200+HS:L200	POS	8.703	447.335	C27 H45 N O4	N-Stearoyl-L-tyrosine	9.60709e-05	0.214763	NA	level4	ChemSpider	NA	NA	NA	NA	NA	NA	NA	NA	NA	Up	3.25349e+06	2.08937e+06	1.68158e+06	2.4485e+07	2.56899e+07	3.20443e+07	3.95063e+07	4.53256e+07	3.24528e+07	4.30792e+07	4.82459e+07	4.38741e+07
8.707_423.33494	3.43957	0.0216041	0.143556	1.78884	LL200+HS:L200	POS	8.707	423.335	C25 H45 N O4	Linoleyl carnitine	8.33649e-05	0.196924	NA	level4	ChemSpider	NA	NA	NA	NA	NA	NA	NA	NA	NA	Up	2.71084e+06	2.74793e+06	2.63243e+06	4.65647e+07	2.5923e+07	3.9783e+07	5.97088e+07	9.68528e+07	5.26004e+07	6.9878e+07	6.00023e+07	7.49509e+07
8.768_332.17543	0.240899	0.027174	0.153487	1.35794	LL200+HS:L200	POS	8.768	332.175	C16 H16 D6 O7	(7E)-8-[(1R,2R,5R)-2-(2-Carboxyethyl)-5-hydroxy-3-oxocyclopentyl]-6-oxo(2,2,3,3,4,4-~2~H_6_)-7-octenoic acid	0.00121875	3.66901	NA	level4	ChemSpider	NA	NA	NA	NA	NA	NA	NA	NA	NA	Down	1.96598e+06	243594	735766	201805	378897	242746	113928	167827	183600	202950	152237	87354.7
8.769_286.25077	2.95868	0.0289256	0.156593	1.51934	LL200+HS:L200	POS	8.769	286.251	C17 H34 O3	methyl 3-hydroxypalmitate	-2.5065e-05	-0.0875632	NA	level4	ChemSpider	NA	NA	NA	NA	NA	NA	NA	NA	NA	Up	69178.5	601654	143308	380319	28464.1	199094	1.33903e+06	693857	1.03241e+06	447129	329821	365043
8.822_276.20805	0.178747	0.0371796	0.165563	1.39557	LL200+HS:L200	POS	8.822	276.208	C18 H28 O2	(E)-parinaric acid	-0.000878932	-3.18213	NA	level4	ChemSpider	NA	NA	NA	NA	NA	NA	NA	NA	NA	Down	5.50938e+08	7.53744e+07	8.21367e+07	2.99445e+07	4.28074e+07	5.06573e+07	2.88709e+07	3.13998e+07	1.46588e+07	2.69054e+07	2.00428e+07	2.68147e+07
8.825_391.34469	0.162049	0.0379014	0.166183	1.48196	LL200+HS:L200	POS	8.825	391.345	C25 H45 N O2	1-Cyano-2-methyl-2-propen-1-yl icosanoate	-0.000335461	-0.857201	NA	level4	ChemSpider	NA	NA	NA	NA	NA	NA	NA	NA	NA	Down	511569	384331	1.41664e+06	5.79685e+06	4.76737e+06	6.58196e+06	1.04681e+06	779541	221457	249887	467674	387888
8.829_334.18955	0.171289	0.0403327	0.169451	1.44426	LL200+HS:L200	POS	8.829	334.19	C18 H26 N2 O4	Proglumide	0.000296944	0.88855	NA	level4	ChemSpider	NA	NA	NA	NA	NA	NA	NA	NA	NA	Down	2.20357e+06	286899	421833	86462.4	1.03508e+06	231319	92954.5	163741	109661	156195	134696	73330
8.837_288.24502	3.0665	0.0274573	0.153875	1.53419	LL200+HS:L200	POS	8.837	288.245	C20 H32 O	ethylestrenol	-0.000299623	-1.03947	NA	level4	ChemSpider	NA	NA	NA	NA	NA	NA	NA	NA	NA	Up	857393	7.26015e+06	4.56516e+06	2.66148e+07	5.81902e+06	7.27785e+06	5.38238e+07	1.92375e+07	4.12617e+07	1.86208e+07	1.00503e+07	1.76732e+07
8.888_344.23495	0.342164	0.0478046	0.181062	1.14521	LL200+HS:L200	POS	8.888	344.235	C22 H32 O3	tp	-0.000197182	-0.572813	NA	level4	ChemSpider	NA	NA	NA	NA	NA	NA	NA	NA	NA	Down	3.95898e+07	2.18917e+07	2.83544e+07	4.03371e+06	1.03832e+07	1.03755e+07	4.88762e+06	1.30512e+07	6.31677e+06	5.74613e+06	5.88652e+06	3.33345e+06
8.889_363.24012	0.128815	0.0131336	0.126266	1.61966	LL200+HS:L200	POS	8.889	363.24	C21 H33 N O4	Cardiopetalidine	-0.000834472	-2.2973	NA	level4	ChemSpider	NA	NA	NA	NA	NA	NA	NA	NA	NA	Down	97100.3	742092	1.68676e+06	272547	165910	267939	69999	69360.5	58614.3	77243.6	66911.2	74247.2
8.901_407.24958	0.0954933	0.00926134	0.11317	1.8159	LL200+HS:L200	NEG	8.901	407.25	C23 H37 N O3 S	N-[(2E,6E,10E)-3,7,11,15-Tetramethyl-2,6,10,14-hexadecatetraenoyl]-L-cysteine	0.000163953	0.402585	NA	level4	ChemSpider	NA	NA	NA	NA	NA	NA	NA	NA	NA	Down	683191	629537	1.60089e+06	150139	83794.6	124472	21887.7	79894.3	48936.4	60479.7	51040.9	50217
8.905_350.15376	0.264839	0.0079894	0.110454	1.5463	LL200+HS:L200	POS	8.905	350.154	C19 H26 O4 S	Propargite	-0.00142459	-4.06847	NA	level4	ChemSpider	NA	NA	NA	NA	NA	NA	NA	NA	NA	Down	771878	253701	1.57716e+06	935242	1.63808e+06	1.78621e+06	144232	199159	124964	378657	663337	333531
8.929_250.19314	0.531922	0.002743	0.0732429	1.05373	LL200+HS:L200	NEG	8.929	250.193	C16 H26 O2	4-tert-Octylphenol monoethoxylate	-0.000138887	-0.555121	NA	level4	ChemSpider	NA	NA	NA	NA	NA	NA	NA	NA	NA	Down	1.03542e+07	1.85174e+07	1.32066e+07	2.12399e+07	1.46139e+07	1.53003e+07	4.48461e+06	8.94893e+06	7.66233e+06	8.99305e+06	9.01514e+06	1.04883e+07
8.934_226.19332	0.181552	0.0173638	0.134858	1.59878	LL200+HS:L200	NEG	8.934	226.193	C14 H26 O2	Myristoleic acid	3.71481e-05	0.164232	NA	level4	ChemSpider	NA	NA	NA	NA	NA	NA	NA	NA	NA	Down	8.88606e+06	1.21805e+06	1.41911e+07	2.53787e+06	1.69832e+07	9.909e+06	611180	1.20405e+06	1.3237e+06	1.88652e+06	2.2145e+06	2.514e+06
8.942_356.26712	0.0398691	0.0182608	0.136225	2.02789	LL200+HS:L200	POS	8.942	356.267	C19 H36 N2 O4	N~2~-Tetradecanoyl-L-glutamine	-0.000383888	-1.07753	NA	level4	ChemSpider	NA	NA	NA	NA	NA	NA	NA	NA	NA	Down	3.48696e+06	1.336e+06	4.95798e+06	86438.2	106871	462525	81426.7	43290.9	41001.8	87647	124081	38657.9
8.949_311.24616	0.0769163	0.00840751	0.111869	1.90042	LL200+HS:L200	NEG	8.949	311.246	C18 H33 N O3	N-tetradecanoyl-L-Homoserine Lactone	0.000113188	0.363662	NA	level4	ChemSpider	NA	NA	NA	NA	NA	NA	NA	NA	NA	Down	1.84627e+07	5.98412e+06	8.3066e+07	3.54515e+06	7.72796e+06	5.94529e+06	1.03915e+06	1.71368e+06	1.79511e+06	1.41554e+06	2.00545e+06	1.62494e+06
8.957_355.27245	0.0421817	0.0104438	0.118983	2.0151	LL200+HS:L200	NEG	8.957	355.272	C20 H37 N O4	N-[(9Z)-3-Hydroxy-9-octadecenoyl]glycine	0.000195559	0.550448	NA	level4	ChemSpider	NA	NA	NA	NA	NA	NA	NA	NA	NA	Down	4.4987e+06	1.76904e+06	2.39981e+07	513682	1.15618e+06	719658	110550	298872	230591	232777	235376	269294
8.959_373.26193	0.210545	0.00400446	0.0881421	1.57273	LL200+HS:L200	NEG	8.959	373.262	C23 H35 N O3	Myxalamid D	0.000239282	0.641058	NA	level4	ChemSpider	NA	NA	NA	NA	NA	NA	NA	NA	NA	Down	2.90631e+06	3.59054e+06	8.75129e+06	2.0088e+06	1.27673e+06	1.25513e+06	270002	826101	537866	870709	943439	718314
8.962_436.25749	0.316593	0.0150502	0.129574	1.31324	LL200+HS:L200	NEG	8.962	436.257	C21 H41 O7 P	1-Oleoyl-lysophosphatidic acid	-0.00149968	-3.43758	NA	level4	ChemSpider	NA	NA	NA	NA	NA	NA	NA	NA	NA	Down	257834	305692	904039	351993	164366	158927	29816.2	174173	66476.1	187461	124866	95620
8.964_482.26431	0.229815	0.0318318	0.159354	1.28743	LL200+HS:L200	NEG	8.964	482.264	C22 H43 O9 P	(2R)-3-({[(2S)-2,3-Dihydroxypropoxy](hydroxy)phosphoryl}oxy)-2-hydroxypropyl (9Z)-9-hexadecenoate	-0.000160702	-0.333224	NA	level4	ChemSpider	NA	NA	NA	NA	NA	NA	NA	NA	NA	Down	625506	746269	6.67577e+06	985033	3.11843e+06	1.07567e+06	264565	506855	479769	598238	532477	657788
8.994_343.25080	0.145551	0.0370545	0.165483	1.45964	LL200+HS:L200	POS	8.994	343.251	C22 H33 N O2	(1R,2S,3S,6R,7R,11R,14R,16S)-7-Isopropyl-2,6-dimethyl-19-oxa-17-azapentacyclo[14.2.1.0~2,14~.0~3,11~.0~6,10~]nonadec-9-en-8-one	-0.000333125	-0.970501	NA	level4	ChemSpider	NA	NA	NA	NA	NA	NA	NA	NA	NA	Down	3.62447e+06	984854	539733	208671	155575	274382	141558	222543	165810	78388.3	133035	101071
8.995_406.28307	0.100506	0.0390747	0.167033	1.56592	LL200+HS:L200	POS	8.995	406.283	C23 H38 N2 O4	N-linolenoyl-L-glutamine	-8.37714e-05	-0.20619	NA	level4	ChemSpider	NA	NA	NA	NA	NA	NA	NA	NA	NA	Down	5.62084e+06	8.14931e+06	1.17263e+07	616658	428521	928053	368087	449897	275027	440309	569320	658233
8.999_250.22962	0.258387	0.0218769	0.143797	1.37483	LL200+HS:L200	POS	8.999	250.23	C17 H30 O	Civetone	-4.24902e-05	-0.169805	NA	level4	ChemSpider	NA	NA	NA	NA	NA	NA	NA	NA	NA	Down	7.70944e+06	1.04297e+06	2.48018e+06	792845	1.41996e+06	1.26558e+06	717865	373241	915703	285276	685227	823820
9.006_332.23496	0.281076	0.0433863	0.174429	1.21192	LL200+HS:L200	POS	9.006	332.235	C21 H32 O3	20-alfa-Dhydrodydrogesterone	-0.000181873	-0.547422	NA	level4	ChemSpider	NA	NA	NA	NA	NA	NA	NA	NA	NA	Down	9.40429e+06	1.1924e+06	1.21226e+06	1.32969e+06	1.213e+06	1.26123e+06	799805	678164	780767	855192	929590	344881
9.007_384.30158	0.100506	0.0390747	0.167033	1.56592	LL200+HS:L200	POS	9.007	384.302	C26 H40 O2	(8Z,11Z,14Z,17Z,20Z,23Z)-hexacosahexaenoic acid	-0.00124857	-3.24891	NA	level4	ChemSpider	NA	NA	NA	NA	NA	NA	NA	NA	NA	Down	5.62084e+06	8.14931e+06	1.17263e+07	616658	428521	928053	368087	449897	275027	440309	569320	658233
9.01_452.26555	0.126871	0.0244394	0.150095	1.58945	LL200+HS:L200	POS	9.01	452.266	C27 H36 N2 O4	PRANDIN	-0.00195696	-4.327	NA	level4	ChemSpider	NA	NA	NA	NA	NA	NA	NA	NA	NA	Down	570538	903331	1.37895e+06	92580.7	82550.9	176171	61607.6	61155.2	64388.6	55450.2	102435	61475.2
9.011_368.23261	0.285375	0.0076499	0.10905	1.52976	LL200+HS:L200	POS	9.011	368.233	C19 H32 N2 O5	Perindopril	0.00148744	4.03941	NA	level4	ChemSpider	NA	NA	NA	NA	NA	NA	NA	NA	NA	Down	1.5056e+07	5.05412e+06	3.89322e+06	3.02589e+06	4.85293e+06	3.71975e+06	1.62014e+06	3.06086e+06	574191	1.93073e+06	2.42564e+06	548354
9.011_431.28664	0.0908477	0.012718	0.125383	1.81911	LL200+HS:L200	POS	9.011	431.287	C22 H41 N O7	sphingofungin C	-0.00166427	-3.85882	NA	level4	ChemSpider	NA	NA	NA	NA	NA	NA	NA	NA	NA	Down	582238	879584	1.17755e+06	93531.4	62163.9	121223	37882.2	33574.2	35862.9	34096	92012.2	31510.4
9.015_346.25048	0.288221	0.00811613	0.110707	1.52068	LL200+HS:L200	POS	9.015	346.25	C22 H34 O3	Ginkgoic acid	-0.000311402	-0.899354	NA	level4	ChemSpider	NA	NA	NA	NA	NA	NA	NA	NA	NA	Down	1.5056e+07	5.05412e+06	3.89322e+06	3.02589e+06	4.85293e+06	3.71975e+06	1.72144e+06	3.06086e+06	574191	1.93073e+06	2.42564e+06	548354
9.022_325.26194	0.0628544	0.00548385	0.102018	2.01219	LL200+HS:L200	NEG	9.022	325.262	C20 H23 D7 O3	(6E,8Z,11Z,14Z)-5-Oxo(6,8,9,11,12,14,15-~2~H_7_)-6,8,11,14-icosatetraenoic acid	-0.00149636	-4.60046	NA	level4	ChemSpider	NA	NA	NA	NA	NA	NA	NA	NA	NA	Down	1.56814e+07	4.57042e+06	6.56717e+07	2.71456e+06	6.02968e+06	3.93683e+06	468657	910536	920774	1.289e+06	1.32469e+06	1.28408e+06
9.027_368.25564	2.01792	0.036386	0.164963	1.09869	LL200+HS:L200	POS	9.027	368.256	C21 H36 O5	Carboprost	-0.000631933	-1.71602	NA	level4	ChemSpider	NA	NA	NA	NA	NA	NA	NA	NA	NA	Up	1.56035e+06	694007	1.01124e+06	4.1631e+06	3.93914e+06	2.48319e+06	2.19388e+06	4.40268e+06	4.35447e+06	6.06006e+06	4.72499e+06	6.21417e+06
9.03_350.24536	2.06315	0.0479601	0.181309	1.12057	LL200+HS:L200	POS	9.03	350.245	C21 H34 O4	10-GINGEROL	-0.000348533	-0.995109	NA	level4	ChemSpider	NA	NA	NA	NA	NA	NA	NA	NA	NA	Up	1.56035e+06	441917	934225	4.1631e+06	3.93914e+06	2.48319e+06	2.14138e+06	4.40268e+06	4.35447e+06	6.06006e+06	4.72499e+06	6.21417e+06
9.04_308.21388	0.268152	0.0225005	0.144397	1.31181	LL200+HS:L200	POS	9.04	308.214	C22 H28 O	(19Z)-19-Docosene-2,7,13,21-tetrayn-1-ol	-0.000131181	-0.425618	NA	level4	ChemSpider	NA	NA	NA	NA	NA	NA	NA	NA	NA	Down	580142	1.03662e+06	659447	104371	269970	220666	102958	222339	143707	99115.4	104472	97331.3
9.041_315.24078	0.119383	0.00885128	0.112031	1.75852	LL200+HS:L200	POS	9.041	315.241	C17 H33 N O4	decanoylcarnitine	-0.000182909	-0.58022	NA	level4	ChemSpider	NA	NA	NA	NA	NA	NA	NA	NA	NA	Down	3.4993e+06	1.38235e+06	6.95867e+06	439969	610896	844316	103532	302316	224011	315115	428788	266026
9.048_387.24465	0.243472	0.00118262	0.0466507	1.73858	LL200+HS:L200	NEG	9.048	387.245	C20 H37 N O4 S	2-[(9Z,12Z)-9,12-Octadecadienoylamino]ethanesulfonic acid	0.000320917	0.828721	NA	level4	ChemSpider	NA	NA	NA	NA	NA	NA	NA	NA	NA	Down	4.46579e+07	1.95297e+07	4.21248e+07	1.88355e+07	1.61511e+07	4.78441e+07	1.82744e+07	7.17288e+06	3.81613e+06	3.95822e+06	8.90275e+06	3.92673e+06
9.051_411.24460	0.412905	0.0155643	0.1304	1.32463	LL200+HS:L200	NEG	9.051	411.245	C22 H37 N O4 S	N-arachidonoyltaurine	0.000268613	0.653172	NA	level4	ChemSpider	NA	NA	NA	NA	NA	NA	NA	NA	NA	Down	1.02708e+07	1.00218e+07	1.18734e+07	8.97776e+06	6.03166e+06	2.14963e+07	1.13521e+07	7.00913e+06	2.17307e+06	1.9534e+06	3.63067e+06	2.23649e+06
9.075_382.28301	0.0220107	0.00842611	0.111869	2.26592	LL200+HS:L200	POS	9.075	382.283	C21 H38 N2 O4	N~2~-[(9Z)-9-Hexadecenoyl]-L-glutamine	-0.000150292	-0.393143	NA	level4	ChemSpider	NA	NA	NA	NA	NA	NA	NA	NA	NA	Down	2.02547e+07	6.45168e+06	8.09332e+07	736553	2.22889e+06	2.43871e+06	193759	284508	180807	585797	688014	555291
9.095_369.36061	0.245989	0.0124504	0.124887	1.46572	LL200+HS:L200	POS	9.095	369.361	C23 H47 N O2	(2S,3R,4S)-2-(Hydroxymethyl)-4-(12-methyloctadecyl)-3-azetidinol	-6.86676e-05	-0.185909	NA	level4	ChemSpider	NA	NA	NA	NA	NA	NA	NA	NA	NA	Down	3.30383e+06	2.31317e+06	7.53828e+06	9.69142e+06	1.76665e+07	1.45281e+07	3.06071e+06	2.90091e+06	1.46098e+06	1.40001e+06	2.76018e+06	1.95676e+06
9.099_465.28809	0.235971	0.0139934	0.128102	1.41392	LL200+HS:L200	POS	9.099	465.288	C29 H39 N O4	(3S,3aR,4S,6S,6aR,7E,10S,12R,13E,15R,15aR)-3-Benzyl-6,15-dihydroxy-12-methoxy-4,10,12-trimethyl-5-methylene-2,3,3a,4,5,6,6a,9,10,11,12,15-dodecahydro-1H-cycloundeca[d]isoindol-1-one	0.000182797	0.392869	NA	level4	ChemSpider	NA	NA	NA	NA	NA	NA	NA	NA	NA	Down	5.62976e+06	8.44806e+06	1.19306e+07	2.08988e+06	1.50807e+06	2.33023e+06	559277	1.98443e+06	1.13071e+06	1.19227e+06	1.56927e+06	1.10017e+06
9.108_698.52651	0.110202	0.00906637	0.11259	1.7712	LL200+HS:L200	NEG	9.108	698.527	C47 H70 O4	petroformynic acid C	-0.000904662	-1.2951	NA	level4	ChemSpider	NA	NA	NA	NA	NA	NA	NA	NA	NA	Down	809801	2.30574e+06	1.6031e+06	295012	134746	171541	45805.1	276377	95005.9	56433.4	46108	66539.1
9.112_427.36623	2.18858	0.0436243	0.174562	1.20916	LL200+HS:L200	POS	9.112	427.366	C25 H49 N O4	7309670	7.09378e-05	0.165988	NA	level4	ChemSpider	NA	NA	NA	NA	NA	NA	NA	NA	NA	Up	4.56926e+06	1.73338e+06	8.64853e+06	1.93358e+07	1.87785e+07	1.58282e+07	3.31357e+07	3.15488e+07	1.81422e+07	1.72142e+07	2.53829e+07	2.53551e+07
9.123_383.26720	0.0921362	0.00231581	0.068732	2.01235	LL200+HS:L200	POS	9.123	383.267	C21 H37 N O5	O-[(5Z,8Z)-3-hydroxytetradecadienoyl]carnitine	2.81167e-05	0.0733605	NA	level4	ChemSpider	NA	NA	NA	NA	NA	NA	NA	NA	NA	Down	2.90087e+06	930204	5.95946e+06	352121	1.05079e+06	836677	60775.6	207167	182162	117373	256346	284586
9.126_285.23029	0.219495	0.0154638	0.130352	1.45713	LL200+HS:L200	POS	9.126	285.23	C16 H31 N O3	1794967	-0.000100703	-0.353057	NA	level4	ChemSpider	NA	NA	NA	NA	NA	NA	NA	NA	NA	Down	7.36273e+06	3.62003e+06	1.60251e+07	1.60383e+06	2.29721e+06	2.86419e+06	776633	1.35325e+06	1.16516e+06	1.32729e+06	1.59266e+06	1.19804e+06
9.135_411.29872	0.147123	0.0102724	0.118375	1.67661	LL200+HS:L200	NEG	9.135	411.299	C23 H41 N O5	OLEOYL GLUTAMIC ACID	0.000247895	0.602714	NA	level4	ChemSpider	NA	NA	NA	NA	NA	NA	NA	NA	NA	Down	5.38446e+06	3.71916e+06	6.50743e+06	820479	665143	1.00617e+06	284833	789804	389826	261123	375179	562586
9.158_466.27140	0.0480663	0.0116318	0.122764	2.02121	LL200+HS:L200	NEG	9.158	466.271	C29 H38 O5	24-Methyl-3,26-dioxo-22,26-epoxy-18-norcholesta-1,4,24-trien-13-yl acetate	-0.000522167	-1.11988	NA	level4	ChemSpider	NA	NA	NA	NA	NA	NA	NA	NA	NA	Down	922800	550521	385262	45922.6	41788.4	27523.5	10077.7	25941.2	24271.5	7553.16	9187.2	17843.3
9.162_335.24596	0.241565	0.00392987	0.0869901	1.5221	LL200+HS:L200	POS	9.162	335.246	C20 H33 N O3	oxeladin	-8.77007e-05	-0.261601	NA	level4	ChemSpider	NA	NA	NA	NA	NA	NA	NA	NA	NA	Down	1.51739e+07	1.54996e+07	3.07158e+07	6.73509e+06	5.3133e+06	6.65704e+06	1.297e+06	4.45952e+06	3.10745e+06	3.21457e+06	3.93757e+06	3.33195e+06
9.162_770.58467	0.0698345	0.0429948	0.173744	1.65297	LL200+HS:L200	NEG	9.162	770.585	C44 H83 O8 P	(2R)-1-(Nonadecanoyloxy)-3-(phosphonooxy)-2-propanyl (13Z,16Z)-13,16-docosadienoate	0.00211342	2.74262	NA	level4	ChemSpider	NA	NA	NA	NA	NA	NA	NA	NA	NA	Down	210836	303415	280050	13572.8	7645.42	15559.8	7750.63	23698.2	7427.46	5809.02	7065.74	6286.92
9.165_310.25069	0.235938	0.0150984	0.129574	1.44331	LL200+HS:L200	POS	9.165	310.251	C19 H34 O3	(+/-)-Methoprene	-0.000101718	-0.327858	NA	level4	ChemSpider	NA	NA	NA	NA	NA	NA	NA	NA	NA	Down	5.61384e+07	1.02171e+07	7.98e+06	8.29988e+06	6.91248e+06	1.12449e+07	3.87417e+06	4.93623e+06	3.81008e+06	4.41364e+06	4.14154e+06	2.60515e+06
9.165_341.25651	0.0410223	0.00277996	0.0732429	2.23985	LL200+HS:L200	POS	9.165	341.257	C19 H35 N O4	trans-2-Dodecenoylcarnitine	-0.000102604	-0.300665	NA	level4	ChemSpider	NA	NA	NA	NA	NA	NA	NA	NA	NA	Down	1.79133e+07	6.30576e+06	7.27435e+07	1.85846e+06	6.19885e+06	4.82058e+06	247594	663631	855298	622991	1.24727e+06	869123
9.166_379.27224	0.135348	0.0446292	0.17611	1.43589	LL200+HS:L200	POS	9.166	379.272	C22 H37 N O4	Leukotriene B4 Ethanolamide	-1.99444e-05	-0.0525858	NA	level4	ChemSpider	NA	NA	NA	NA	NA	NA	NA	NA	NA	Down	1.71308e+06	2.53513e+06	3.40819e+06	303342	175647	230712	103226	281594	182434	135572	210648	218860
9.168_359.24598	0.203403	0.000391469	0.0236407	1.75732	LL200+HS:L200	POS	9.168	359.246	C22 H33 N O3	napelline	-5.96625e-05	-0.166077	NA	level4	ChemSpider	NA	NA	NA	NA	NA	NA	NA	NA	NA	Down	5.61726e+06	8.17352e+06	1.31192e+07	4.01974e+06	3.27826e+06	3.594e+06	557818	1.91738e+06	977609	927783	1.9892e+06	1.31925e+06
9.189_694.55401	0.161596	0.0220372	0.14393	1.51262	LL200+HS:L200	NEG	9.189	694.554	C45 H74 O5	(2S)-1-Hydroxy-3-[(8Z,11Z,14Z)-8,11,14-icosatrienoyloxy]-2-propanyl (7Z,10Z,13Z,16Z)-7,10,13,16-docosatetraenoate	0.000385869	0.555564	NA	level4	ChemSpider	NA	NA	NA	NA	NA	NA	NA	NA	NA	Down	668321	915670	1.54765e+06	234716	119363	99769.7	26916.6	200787	113647	61306.8	94855.4	81887.1
9.2_363.24468	0.270451	0.00649347	0.104113	1.57026	LL200+HS:L200	NEG	9.2	363.245	C18 H37 N O4 S	N-Palmitoyl Taurine	0.000348838	0.96034	NA	level4	ChemSpider	NA	NA	NA	NA	NA	NA	NA	NA	NA	Down	2.06667e+07	4.37618e+06	1.14e+07	4.36921e+06	4.83889e+06	1.46142e+07	6.97224e+06	1.55708e+06	1.3638e+06	1.61853e+06	3.20754e+06	1.57956e+06
9.202_123.99265	1.91687	0.0106208	0.119808	1.15841	LL200+HS:L200	POS	9.202	123.993	C2 H5 O4 P	phosphonoacetaldehyde	0.000102793	0.829023	NA	level4	ChemSpider	NA	NA	NA	NA	NA	NA	NA	NA	NA	Up	3.85556e+06	6.74605e+06	9.2278e+06	1.48928e+07	1.1053e+07	8.69396e+06	1.68274e+07	1.94488e+07	1.6185e+07	2.16621e+07	1.66843e+07	1.36026e+07
9.202_345.26669	0.143342	1.49324e-05	0.00174274	2.11601	LL200+HS:L200	POS	9.202	345.267	C22 H35 N O2	EPEA	-8.99339e-05	-0.260477	NA	level4	ChemSpider	NA	NA	NA	NA	NA	NA	NA	NA	NA	Down	1.92343e+06	1.39694e+06	3.24379e+06	2.92424e+06	3.59635e+06	2.90629e+06	258658	282704	310922	319708	881030	239165
9.205_299.24593	0.151516	0.0134744	0.127453	1.64501	LL200+HS:L200	POS	9.205	299.246	C17 H33 N O3	N-Pentadecanoylglycine	-0.000109967	-0.36748	NA	level4	ChemSpider	NA	NA	NA	NA	NA	NA	NA	NA	NA	Down	3.43876e+06	1.28996e+06	5.49547e+06	398605	608270	1.06308e+06	254018	277633	260203	305486	288243	477177
9.219_396.29926	0.122037	0.0109783	0.120248	1.74643	LL200+HS:L200	NEG	9.219	396.299	C22 H40 N2 O4	N~2~-[(9Z)-9-Octadecenoyl]-L-asparagine	0.000452659	1.14222	NA	level4	ChemSpider	NA	NA	NA	NA	NA	NA	NA	NA	NA	Down	2.30044e+06	2.62182e+06	3.67993e+06	309995	386838	599373	171077	276307	163958	193466	243274	159890
9.231_301.24069	0.229834	4.2994e-05	0.00418962	1.78027	LL200+HS:L200	POS	9.231	301.241	C20 H31 N O	trihexyphenidyl	0.000120561	0.400215	NA	level4	ChemSpider	NA	NA	NA	NA	NA	NA	NA	NA	NA	Down	573551	461361	802972	1.25187e+06	1.10668e+06	853317	127269	153547	170526	215166	345917	148178
9.237_508.31459	0.100555	0.00188274	0.0616261	2.01856	LL200+HS:L200	NEG	9.237	508.315	C25 H49 O8 P	(2R)-1-(Octanoyloxy)-3-(phosphonooxy)-2-propanyl myristate	-0.00191613	-3.76956	NA	level4	ChemSpider	NA	NA	NA	NA	NA	NA	NA	NA	NA	Down	545968	257501	544572	53706	83546.8	174037	11473.4	35361.2	32617.7	15703.9	41136.4	30562
9.24_633.32779	2.1158	0.0155038	0.130352	1.21262	LL200+HS:L200	POS	9.24	633.328	C30 H52 N O11 P	(7R,13E)-1-Amino-4-hydroxy-7-{[(9Z)-9-octadecenoyloxy]methyl}-9,12-dioxo-3,5,8-trioxa-4-phosphapentadec-13-en-15-oic acid 4-oxide	-7.0565e-06	-0.0111419	NA	level4	ChemSpider	NA	NA	NA	NA	NA	NA	NA	NA	NA	Up	7.39941e+06	9.26301e+06	1.2473e+07	2.52172e+07	2.88045e+07	2.78946e+07	2.86899e+07	4.2314e+07	5.95016e+07	3.42001e+07	3.13452e+07	3.89128e+07
9.244_534.29527	0.186198	0.027505	0.154056	1.38608	LL200+HS:L200	NEG	9.244	534.295	C26 H47 O9 P	(2R)-3-({[(2S)-2,3-Dihydroxypropoxy](hydroxy)phosphoryl}oxy)-2-hydroxypropyl (8Z,11Z,14Z)-8,11,14-icosatrienoate	-0.000495466	-0.927325	NA	level4	ChemSpider	NA	NA	NA	NA	NA	NA	NA	NA	NA	Down	894488	1.84264e+06	1.16441e+07	1.43558e+06	5.21592e+06	1.12865e+06	587453	640531	621645	552976	733142	990671
9.245_497.27537	2.59904	0.0293614	0.156593	1.4883	LL200+HS:L200	NEG	9.245	497.275	C22 H44 N O9 P	O-{Hydroxy[(2R)-2-hydroxy-3-(palmitoyloxy)propoxy]phosphoryl}-L-serine	2.44336e-06	0.00491349	NA	level4	ChemSpider	NA	NA	NA	NA	NA	NA	NA	NA	NA	Up	217864	116916	277457	1.15781e+06	1.7015e+06	1.47651e+06	2.15935e+06	2.17713e+06	2.25543e+06	2.26661e+06	1.71398e+06	2.28769e+06
9.257_486.27366	0.154951	0.0138963	0.127961	1.96489	LL200+HS:L200	NEG	9.257	486.274	C25 H43 O7 P	(2R)-1-[(5Z,8Z,11Z,14Z)-5,8,11,14-Icosatetraen-1-yloxy]-3-(phosphonooxy)-2-propanyl acetate	-0.000978669	-2.01259	NA	level4	ChemSpider	NA	NA	NA	NA	NA	NA	NA	NA	NA	Down	7.86547e+06	7.26337e+06	2.07653e+06	409341	453034	1.47773e+06	2.4205e+06	81301.8	269763	44661.1	142587	69771
9.257_609.32766	2.69705	0.0128161	0.125681	1.41332	LL200+HS:L200	POS	9.257	609.328	C28 H52 N O11 P	(7R,13E)-1-Amino-4,12-dihydroxy-9-oxo-7-[(palmitoyloxy)methyl]-3,5,8-trioxa-4-phosphapentadec-13-en-15-oic acid 4-oxide	-0.000141664	-0.232493	NA	level4	ChemSpider	NA	NA	NA	NA	NA	NA	NA	NA	NA	Up	1.1637e+06	978133	1.36093e+06	3.5639e+06	5.64092e+06	5.40692e+06	3.87692e+06	9.8211e+06	1.1493e+07	7.12987e+06	8.00332e+06	8.5315e+06
9.258_670.55102	0.125033	0.0493247	0.182751	1.44126	LL200+HS:L200	NEG	9.258	670.551	C43 H74 O5	1-icosanoyl-2-[(5Z,8Z,11ZZ,14Z,17Z)-eicosapentaenoyl]-sn-glycerol	-0.00260863	-3.89026	NA	level4	ChemSpider	NA	NA	NA	NA	NA	NA	NA	NA	NA	Down	316389	393455	790518	55459.1	24919.1	39838.2	27984.5	78724.2	30253.6	24703.7	24822.9	16137
9.275_439.27007	2.02462	0.0123611	0.124887	1.16929	LL200+HS:L200	POS	9.275	439.27	C20 H42 N O7 P	1-lauroyl-sn-glycero-3-phosphocholine	0.00017816	0.405582	NA	level4	ChemSpider	NA	NA	NA	NA	NA	NA	NA	NA	NA	Up	1.15842e+06	1.60323e+06	508839	1.25163e+06	1.12066e+06	2.56486e+06	3.28038e+06	2.25731e+06	3.69552e+06	2.61993e+06	2.64953e+06	2.11469e+06
9.285_369.28818	0.178124	0.0126231	0.125095	1.56116	LL200+HS:L200	NEG	9.285	369.288	C21 H39 N O4	N-Oleoyl-L-Serine	0.00027627	0.748116	NA	level4	ChemSpider	NA	NA	NA	NA	NA	NA	NA	NA	NA	Down	5.02502e+07	2.6938e+07	1.09186e+08	1.1144e+07	1.24246e+07	1.41881e+07	4.21133e+06	8.71468e+06	6.87309e+06	6.20171e+06	7.1526e+06	6.7698e+06
9.287_481.28043	2.10704	0.0477642	0.181046	1.03666	LL200+HS:L200	NEG	9.287	481.28	C22 H44 N O8 P	1,2-Diheptanoyl-sn-glycero-3-PC	-2.77886e-05	-0.0577389	NA	level4	ChemSpider	NA	NA	NA	NA	NA	NA	NA	NA	NA	Up	861914	243663	610175	516119	1.4615e+06	1.63726e+06	1.94219e+06	1.87259e+06	3.55969e+06	1.376e+06	701921	1.77949e+06
9.287_780.57265	0.0776227	0.0323288	0.159803	1.66664	LL200+HS:L200	NEG	9.287	780.573	C52 H76 O5	(3R,3'R,6'R)-3,3'-Dihydroxy-8-oxo-4',5'-didehydro-5',6',7,8-tetrahydro-beta,beta-caroten-19-yl (2E)-2-dodecenoate	0.00337337	4.32168	NA	level4	ChemSpider	NA	NA	NA	NA	NA	NA	NA	NA	NA	Down	2.2876e+06	1.2135e+06	6.24045e+06	190063	212211	218766	73099.6	143689	89646.4	132905	222056	142976
9.29_389.26021	0.144195	0.00220786	0.0673562	1.93418	LL200+HS:L200	NEG	9.29	389.26	C20 H39 N O4 S	N-Oleoyl Taurine	0.000229789	0.590322	NA	level4	ChemSpider	NA	NA	NA	NA	NA	NA	NA	NA	NA	Down	2.79932e+07	3.07967e+06	1.57413e+07	5.98558e+06	8.92553e+06	2.60382e+07	4.9433e+06	1.58811e+06	1.01813e+06	1.22097e+06	2.74577e+06	1.13881e+06
9.293_821.56021	0.261996	0.0289362	0.156593	1.31364	LL200+HS:L200	NEG	9.293	821.56	C46 H80 N O9 P	O-(Hydroxy{(2R)-2-[(5Z,8Z,11Z,14Z,17Z)-5,8,11,14,17-icosapentaenoyloxy]-3-[(1Z)-1-icosen-1-yloxy]propoxy}phosphoryl)-L-serine	0.00314389	3.82675	NA	level4	ChemSpider	NA	NA	NA	NA	NA	NA	NA	NA	NA	Down	5.09243e+06	6.71103e+06	9.82248e+06	979786	1.8057e+06	1.72283e+06	412884	1.5371e+06	882114	949168	2.18956e+06	876262
9.294_557.28862	2.03457	0.00979494	0.116483	1.18105	LL200+HS:L200	POS	9.294	557.289	C21 H43 N5 O12	4850	-0.00219968	-3.9471	NA	level4	ChemSpider	NA	NA	NA	NA	NA	NA	NA	NA	NA	Up	894671	1.24422e+06	2.54028e+06	3.16498e+06	2.24387e+06	2.58658e+06	6.02963e+06	3.06594e+06	4.35498e+06	4.75641e+06	3.62611e+06	3.95427e+06
9.302_519.33290	1.66339	0.007938	0.110186	1.03166	LL200+HS:L200	POS	9.302	519.333	C26 H50 N O7 P	1-Linoleoyl-2-Hydroxy-sn-glycero-3-PC	0.000410434	0.79031	NA	level4	ChemSpider	NA	NA	NA	NA	NA	NA	NA	NA	NA	Up	5.4488e+08	8.88674e+08	1.03806e+09	1.16019e+09	1.29087e+09	1.18203e+09	1.78429e+09	1.63421e+09	1.70448e+09	1.7319e+09	1.69436e+09	1.60528e+09
9.315_477.28595	1.69636	0.0423126	0.173006	1.00702	LL200+HS:L200	POS	9.315	477.286	C23 H44 N O7 P	1-linoleoyl-sn-glycero-3-phosphoethanolamine	0.000406011	0.850668	NA	level4	ChemSpider	NA	NA	NA	NA	NA	NA	NA	NA	NA	Up	7.59968e+07	1.32117e+08	1.32883e+08	2.95216e+08	3.15338e+08	3.08607e+08	2.99276e+08	3.37618e+08	3.36105e+08	3.64277e+08	4.20023e+08	3.80383e+08
9.32_455.39826	2.44457	0.0251206	0.150095	1.33945	LL200+HS:L200	POS	9.32	455.398	C27 H53 N O4	3-(Icosanoyloxy)-4-(trimethylammonio)butanoate	0.000804994	1.76767	NA	level4	ChemSpider	NA	NA	NA	NA	NA	NA	NA	NA	NA	Up	277894	169559	531469	1.14865e+06	1.99018e+06	834415	2.7981e+06	2.46035e+06	1.07846e+06	2.22804e+06	1.45859e+06	2.08237e+06
9.328_510.29540	0.455753	0.0134195	0.127337	1.07879	LL200+HS:L200	NEG	9.328	510.295	C24 H47 O9 P	1-(9Z-octadecenoyl)-sn-glycero-3-phospho-(1'-sn-glycerol)	-0.000370038	-0.725144	NA	level4	ChemSpider	NA	NA	NA	NA	NA	NA	NA	NA	NA	Down	1.5463e+07	2.0709e+07	5.61378e+07	2.29974e+07	3.70119e+07	1.90808e+07	9.96053e+06	1.11892e+07	1.14777e+07	1.07968e+07	1.73768e+07	1.73151e+07
9.342_383.30381	0.146789	0.00924532	0.113165	1.67641	LL200+HS:L200	NEG	9.342	383.304	C22 H41 N O4	N-oleoylthreonine	0.000251647	0.656521	NA	level4	ChemSpider	NA	NA	NA	NA	NA	NA	NA	NA	NA	Down	2.36018e+07	1.70465e+07	4.7231e+07	4.93545e+06	5.26249e+06	5.1779e+06	1.51123e+06	3.32592e+06	2.94205e+06	2.18132e+06	2.74574e+06	2.45047e+06
9.343_742.58833	0.230738	0.0324203	0.159825	1.29267	LL200+HS:L200	NEG	9.343	742.588	C43 H83 O7 P	(2R)-1-(Octadecyloxy)-3-(phosphonooxy)-2-propanyl (13Z,16Z)-13,16-docosadienoate	0.000690127	0.929355	NA	level4	ChemSpider	NA	NA	NA	NA	NA	NA	NA	NA	NA	Down	166138	489212	445156	68832.5	66032.7	61837.1	26341.6	42866.6	36174.3	48357.7	80255.3	65319.1
9.346_718.58885	0.0676936	0.0310793	0.15789	1.72943	LL200+HS:L200	NEG	9.346	718.589	C41 H83 O7 P	(2R)-1-(Icosyloxy)-3-(phosphonooxy)-2-propanyl stearate	0.00121269	1.6876	NA	level4	ChemSpider	NA	NA	NA	NA	NA	NA	NA	NA	NA	Down	832880	699479	1.40233e+06	57949.4	55592.3	52060	22176.7	36089	30454.8	40711.9	43030.2	37407.3
9.387_337.26172	0.294436	0.0361639	0.164963	1.18779	LL200+HS:L200	POS	9.387	337.262	C20 H35 N O3	Palmitoleyl homoserine lactone	2.91814e-05	0.0865245	NA	level4	ChemSpider	NA	NA	NA	NA	NA	NA	NA	NA	NA	Down	1.15366e+08	1.98565e+08	2.29216e+08	5.07327e+07	3.13304e+07	4.22421e+07	2.68243e+07	5.06957e+07	3.41439e+07	2.71855e+07	3.02405e+07	2.74321e+07
9.399_371.28235	0.497392	0.000244158	0.0172578	1.1868	LL200+HS:L200	POS	9.399	371.282	C24 H37 N O2	Synaptamide	-8.02504e-05	-0.216144	NA	level4	ChemSpider	NA	NA	NA	NA	NA	NA	NA	NA	NA	Down	1.68403e+06	2.15574e+06	2.4311e+06	2.25195e+06	3.03211e+06	2.02238e+06	1.50682e+06	1.2887e+06	1.14438e+06	1.03224e+06	1.02745e+06	753673
9.4_353.29323	0.112959	0.00908005	0.11259	1.76175	LL200+HS:L200	NEG	9.4	353.293	C21 H39 N O3	PALMITOYL PROLINE	0.000240866	0.681773	NA	level4	ChemSpider	NA	NA	NA	NA	NA	NA	NA	NA	NA	Down	1.42956e+08	6.59445e+07	4.0195e+08	2.62457e+07	3.72034e+07	3.30978e+07	7.07409e+06	1.36335e+07	1.16316e+07	1.48185e+07	1.5363e+07	1.73863e+07
9.402_421.28071	0.21939	0.0199919	0.139183	1.40623	LL200+HS:L200	NEG	9.402	421.281	C24 H39 N O5	Talatizamine	-0.00211663	-5.02424	NA	level4	ChemSpider	NA	NA	NA	NA	NA	NA	NA	NA	NA	Down	1.75523e+06	1.0574e+06	4.81194e+06	557365	698997	488112	278610	285833	306669	424478	371209	388674
9.403_536.31091	0.339624	0.0198124	0.138867	1.20047	LL200+HS:L200	NEG	9.403	536.311	C26 H49 O9 P	(2R)-3-({[(2S)-2,3-Dihydroxypropoxy](hydroxy)phosphoryl}oxy)-2-hydroxypropyl (11Z,14Z)-11,14-icosadienoate	-0.000505238	-0.942061	NA	level4	ChemSpider	NA	NA	NA	NA	NA	NA	NA	NA	NA	Down	1.11155e+06	2.4775e+06	3.25213e+06	780924	1.39468e+06	525787	445728	779275	330530	462627	662812	559909
9.405_445.28313	0.166843	0.0124051	0.124887	1.65905	LL200+HS:L200	NEG	9.405	445.283	C26 H39 N O5	N-[(7alpha)-7-Hydroxy-3,24-dioxochol-4-en-24-yl]glycine	0.000301849	0.677881	NA	level4	ChemSpider	NA	NA	NA	NA	NA	NA	NA	NA	NA	Down	427547	523240	542000	36172.7	118226	205557	15289.6	54747.7	56493.7	23092.1	113725	45769.6
9.406_391.25218	0.215123	0.0365303	0.164963	1.35035	LL200+HS:L200	POS	9.406	391.252	C26 H33 N O2	Fenretinide	0.00105463	2.69553	NA	level4	ChemSpider	NA	NA	NA	NA	NA	NA	NA	NA	NA	Down	317193	471998	74678.4	1.6911e+06	870989	438507	134972	112970	145427	123841	234549	79576
9.413_365.29283	0.0590451	0.00644288	0.104113	2.04214	LL200+HS:L200	POS	9.413	365.293	C22 H39 N O3	N-LINOLEOYL-4-AMINOBUTYRIC ACID	-0.000165039	-0.4518	NA	level4	ChemSpider	NA	NA	NA	NA	NA	NA	NA	NA	NA	Down	4.54598e+06	5.82935e+06	1.58777e+07	1.70654e+06	885760	596189	314307	203300	360327	257342	326152	276951
9.432_450.27573	0.121154	0.00282719	0.0736669	1.91109	LL200+HS:L200	NEG	9.432	450.276	C29 H38 O4	Celastrol	-0.00127875	-2.83991	NA	level4	ChemSpider	NA	NA	NA	NA	NA	NA	NA	NA	NA	Down	2.28439e+06	3.88319e+06	8.99302e+06	945037	8.20874e+06	8.23202e+06	398637	887848	635131	613183	559795	848537
9.433_438.27464	0.0626467	0.00481593	0.0970633	2.17006	LL200+HS:L200	NEG	9.433	438.275	C21 H43 O7 P	1-Stearoyl lysophosphatidic acid	-3.83977e-06	-0.0087611	NA	level4	ChemSpider	NA	NA	NA	NA	NA	NA	NA	NA	NA	Down	6.61188e+07	5.30584e+07	8.96139e+06	2.42135e+06	2.86742e+06	1.20882e+07	6.04897e+06	815606	760417	466620	500765	523692
9.437_490.30474	0.188543	0.0135611	0.127805	1.50777	LL200+HS:L200	NEG	9.437	490.305	C25 H47 O7 P	(2R)-2-Hydroxy-3-(phosphonooxy)propyl (13Z,16Z)-13,16-docosadienoate	-0.00119879	-2.44499	NA	level4	ChemSpider	NA	NA	NA	NA	NA	NA	NA	NA	NA	Down	1.11155e+06	3.12122e+06	5.48146e+06	642246	1.86989e+06	525787	301587	463271	330530	297985	538398	472561
9.44_387.28076	0.254944	0.0418155	0.17215	1.22171	LL200+HS:L200	NEG	9.44	387.281	C21 H41 N O3 S	N-Palmitoyl-L-methionine	4.82088e-05	0.12448	NA	level4	ChemSpider	NA	NA	NA	NA	NA	NA	NA	NA	NA	Down	1.25305e+08	1.98242e+08	3.05204e+08	3.07163e+07	4.00074e+07	4.47157e+07	2.12403e+07	5.31563e+07	3.41085e+07	2.62326e+07	2.65286e+07	2.846e+07
9.441_303.25582	0.387627	0.0320124	0.159696	1.30213	LL200+HS:L200	POS	9.441	303.256	C20 H33 N O	cis-fenpropimorph	-0.000394213	-1.29993	NA	level4	ChemSpider	NA	NA	NA	NA	NA	NA	NA	NA	NA	Down	3.2426e+06	8.91325e+06	5.0585e+06	5.68885e+06	2.33867e+06	3.73356e+06	2.75828e+06	746111	4.00976e+06	275927	1.72064e+06	1.72093e+06
9.457_495.33278	1.81561	0.0389518	0.166888	1.07133	LL200+HS:L200	POS	9.457	495.333	C24 H50 N O7 P	Lysolecithin	0.00029464	0.594833	NA	level4	ChemSpider	NA	NA	NA	NA	NA	NA	NA	NA	NA	Up	6.68831e+08	4.96368e+08	7.22773e+08	1.92752e+09	2.13972e+09	2.28043e+09	2.22324e+09	2.20463e+09	2.43325e+09	2.54026e+09	2.81805e+09	2.73323e+09
9.464_541.33718	2.08474	0.0262548	0.151709	1.2257	LL200+HS:L200	NEG	9.464	541.337	C25 H52 N O9 P	O-(Hydroxy{(2R)-2-hydroxy-3-[(2-methoxyoctadecyl)oxy]propoxy}phosphoryl)-L-serine	-0.000792275	-1.46355	NA	level4	ChemSpider	NA	NA	NA	NA	NA	NA	NA	NA	NA	Up	3.84981e+07	2.93427e+07	3.95427e+07	1.29429e+08	1.34122e+08	1.4485e+08	1.73768e+08	1.47738e+08	1.82181e+08	1.79242e+08	1.94931e+08	1.97417e+08
9.468_475.26781	1.79844	0.00227102	0.0682461	1.11134	LL200+HS:L200	POS	9.468	475.268	C23 H42 N O7 P	(2R)-1-{[(2-Aminoethoxy)(hydroxy)phosphoryl]oxy}-3-hydroxy-2-propanyl (9Z,12Z,15Z)-9,12,15-octadecatrienoate	-0.00208014	-4.37676	NA	level4	ChemSpider	NA	NA	NA	NA	NA	NA	NA	NA	NA	Up	1.71633e+07	2.3806e+07	2.02908e+07	3.22818e+07	2.96447e+07	3.67561e+07	4.33794e+07	4.49757e+07	6.04284e+07	4.75569e+07	4.27429e+07	4.85629e+07
9.47_410.31457	0.032202	0.043008	0.173744	1.81721	LL200+HS:L200	POS	9.47	410.315	C23 H42 N2 O4	N-oleoyl glutamine	0.000114683	0.279501	NA	level4	ChemSpider	NA	NA	NA	NA	NA	NA	NA	NA	NA	Down	1.67231e+07	2.22166e+07	4.46512e+07	661189	461102	1.00603e+06	469678	325353	377366	711501	426063	450368
9.508_413.29648	0.143562	0.035367	0.164346	1.45484	LL200+HS:L200	NEG	9.508	413.296	C23 H43 N O3 S	N-Oleoyl-L-methionine	0.000112515	0.272238	NA	level4	ChemSpider	NA	NA	NA	NA	NA	NA	NA	NA	NA	Down	2.87164e+08	3.18929e+08	6.51803e+08	4.65495e+07	3.97878e+07	4.85486e+07	1.91486e+07	4.49255e+07	3.83816e+07	3.42543e+07	2.61515e+07	3.70883e+07
9.539_624.16978	0.32819	0.00238955	0.0701283	1.4925	LL200+HS:L200	POS	9.539	624.17	C28 H32 O16	Complanatuside	0.000746673	1.19627	NA	level4	ChemSpider	NA	NA	NA	NA	NA	NA	NA	NA	NA	Down	1.72411e+06	3.56557e+06	1.68045e+06	1.51706e+06	1.46233e+06	1.24764e+06	583651	1.2161e+06	252518	343525	820383	458625
9.546_607.34882	0.278494	0.00908375	0.11259	1.56191	LL200+HS:L200	POS	9.546	607.349	C29 H54 N O10 P	(2R)-3-{[(2-Aminoethoxy)(hydroxy)phosphoryl]oxy}-2-{[(6E)-5-hydroxy-8-oxo-6-octenoyl]oxy}propyl palmitate	0.000282898	0.465792	NA	level4	ChemSpider	NA	NA	NA	NA	NA	NA	NA	NA	NA	Down	4.09493e+06	2.68059e+06	4.57313e+06	1.36919e+06	1.85466e+06	7.48596e+06	2.30863e+06	299167	1.81709e+06	351318	538682	828260
9.555_381.32440	0.106362	0.0128726	0.125805	1.74607	LL200+HS:L200	NEG	9.555	381.324	C23 H43 N O3	2LYI9HY04V	0.000102047	0.267612	NA	level4	ChemSpider	NA	NA	NA	NA	NA	NA	NA	NA	NA	Down	4.82631e+07	3.85405e+07	8.45904e+07	5.75703e+06	6.9786e+06	7.51961e+06	1.67403e+06	4.0482e+06	4.05599e+06	3.72437e+06	3.16497e+06	3.71671e+06
9.556_363.27676	0.0985198	0.0393698	0.167509	1.55408	LL200+HS:L200	POS	9.556	363.277	C22 H37 N O3	Leukotriene B4 dimethylamide	-0.000587618	-1.61755	NA	level4	ChemSpider	NA	NA	NA	NA	NA	NA	NA	NA	NA	Down	4.91599e+06	7.42006e+06	1.48942e+07	585861	669183	730900	420131	587710	311428	423666	649614	485827
9.558_403.30874	0.231041	0.0293312	0.156593	1.33446	LL200+HS:L200	NEG	9.558	403.309	C25 H41 N O3	N-Palmitoyl-L-phenylalanine	9.54645e-05	0.236703	NA	level4	ChemSpider	NA	NA	NA	NA	NA	NA	NA	NA	NA	Down	1.34044e+08	1.78017e+08	1.72549e+08	2.43425e+07	3.01731e+07	3.28191e+07	1.31604e+07	3.04829e+07	2.12334e+07	2.39788e+07	2.17572e+07	2.15298e+07
9.571_419.34017	0.262301	0.0384164	0.166515	1.22666	LL200+HS:L200	NEG	9.571	419.34	C26 H45 N O3	STEARDA	0.000225453	0.537638	NA	level4	ChemSpider	NA	NA	NA	NA	NA	NA	NA	NA	NA	Down	953719	2.05334e+06	2.16881e+06	328364	328145	339478	176653	256869	248673	253374	432948	250367
9.573_367.30844	0.0378048	0.00582613	0.103893	2.15073	LL200+HS:L200	POS	9.573	367.308	C22 H41 N O3	N-octadecanoyl-L-Homoserine lactone	-0.000199379	-0.542812	NA	level4	ChemSpider	NA	NA	NA	NA	NA	NA	NA	NA	NA	Down	2.56214e+07	1.48514e+07	1.04892e+08	2.134e+06	5.94515e+06	3.35562e+06	261455	1.27831e+06	1.14154e+06	710849	1.16472e+06	1.3709e+06
9.573_772.63668	0.123847	0.0496609	0.183361	1.43496	LL200+HS:L200	NEG	9.573	772.637	C45 H89 O7 P	(2R)-1-(Icosyloxy)-3-(phosphonooxy)-2-propanyl (11Z)-11-docosenoate	0.00208649	2.70049	NA	level4	ChemSpider	NA	NA	NA	NA	NA	NA	NA	NA	NA	Down	1.18784e+06	2.44373e+06	2.43276e+06	160502	145514	174196	77232.2	121379	111627	127821	198380	174083
9.577_369.32445	0.20944	0.0324	0.159803	1.35259	LL200+HS:L200	NEG	9.577	369.324	C22 H43 N O3	4-(Stearoylamino)butanoic acid	0.000158945	0.430367	NA	level4	ChemSpider	NA	NA	NA	NA	NA	NA	NA	NA	NA	Down	9.96983e+07	1.42302e+08	1.53348e+08	1.68442e+07	2.21096e+07	2.30003e+07	8.71284e+06	2.55853e+07	1.53015e+07	1.56438e+07	1.57721e+07	1.47618e+07
9.579_377.29276	0.232867	0.0345607	0.163857	1.30459	LL200+HS:L200	POS	9.579	377.293	C23 H39 N O3	Arachidonoyl Serinol	-0.000237418	-0.629268	NA	level4	ChemSpider	NA	NA	NA	NA	NA	NA	NA	NA	NA	Down	5.28185e+06	5.5553e+06	9.33679e+06	1.1109e+06	1.12339e+06	1.01655e+06	1.16674e+06	700008	1.70199e+06	446157	430164	1.0098e+06
9.591_401.29272	0.0673411	0.0138011	0.127937	1.86228	LL200+HS:L200	POS	9.591	401.293	C25 H39 N O3	Cetilistat	-0.000277325	-0.69108	NA	level4	ChemSpider	NA	NA	NA	NA	NA	NA	NA	NA	NA	Down	4.0582e+07	2.91549e+07	1.46129e+08	4.81251e+06	7.92736e+06	5.80838e+06	1.85038e+06	1.89211e+06	3.59979e+06	1.83521e+06	3.47491e+06	3.13331e+06
9.613_348.26615	0.356171	0.0300623	0.156593	1.17904	LL200+HS:L200	POS	9.613	348.266	C22 H36 O3	anacardic acid	-0.000295028	-0.847134	NA	level4	ChemSpider	NA	NA	NA	NA	NA	NA	NA	NA	NA	Down	6.51021e+06	5.31985e+06	7.85303e+06	2.17748e+06	1.5747e+06	1.62565e+06	669729	2.87518e+06	963986	1.22598e+06	959422	2.23167e+06
9.62_339.27738	0.116856	0.0115832	0.122637	1.71266	LL200+HS:L200	POS	9.62	339.277	C20 H37 N O3	MFCD01320532	3.42445e-05	0.100934	NA	level4	ChemSpider	NA	NA	NA	NA	NA	NA	NA	NA	NA	Down	1.28793e+08	7.9837e+07	4.34031e+08	2.76302e+07	3.8609e+07	3.12288e+07	1.08637e+07	2.11919e+07	1.48807e+07	1.17291e+07	1.40331e+07	1.37901e+07
9.639_218.20355	0.311465	0.0191482	0.138217	1.37083	LL200+HS:L200	POS	9.639	218.204	C16 H26	4,8,12-trimethyltrideca 1,3,7,11-tetraene	9.57831e-05	0.438962	NA	level4	ChemSpider	NA	NA	NA	NA	NA	NA	NA	NA	NA	Down	6.31864e+06	1.63214e+06	1.08528e+07	4.41218e+06	1.33346e+07	8.34481e+06	796175	1.455e+06	1.77815e+06	1.96803e+06	3.72388e+06	4.26204e+06
9.639_562.36795	0.453146	0.0463123	0.178646	1.12407	LL200+HS:L200	POS	9.639	562.368	C36 H50 O5	4-[(1S,3R,5Z,7E)-1,3,25-Trihydroxy-9,10-secocholesta-5,7,9,10-tetraen-11-yl]benzyl acetate	0.00212834	3.78461	NA	level4	ChemSpider	NA	NA	NA	NA	NA	NA	NA	NA	NA	Down	2.17151e+06	798999	3.17186e+06	2.13767e+06	4.14664e+06	3.01707e+06	466252	342245	1.05067e+06	1.46122e+06	1.86169e+06	1.81619e+06
9.677_663.43145	1.93268	0.00429922	0.091633	1.17084	LL200+HS:L200	POS	9.677	663.431	C37 H61 N O9	anthenoside A2	-0.00318704	-4.80385	NA	level4	ChemSpider	NA	NA	NA	NA	NA	NA	NA	NA	NA	Up	1.59545e+06	3.47117e+06	2.08744e+06	4.32694e+06	3.66986e+06	2.86709e+06	7.04846e+06	5.93686e+06	6.91944e+06	4.94943e+06	5.53816e+06	4.43052e+06
9.682_381.16176	1.9853	0.0146444	0.128935	1.05848	LL200+HS:L200	POS	9.682	381.162	C22 H24 Cl N3 O	Azelastine	0.000968681	2.5414	NA	level4	ChemSpider	NA	NA	NA	NA	NA	NA	NA	NA	NA	Up	3.80653e+06	2.1477e+06	2.80893e+06	3.54721e+06	1.13371e+06	3.04683e+06	3.57767e+06	4.92633e+06	1.00725e+07	5.41635e+06	4.12349e+06	4.62307e+06
9.697_420.26432	3.74355	0.0168069	0.13367	1.82189	LL200+HS:L200	NEG	9.697	420.264	C21 H41 O6 P	(2-Hydroxy-2-oxido-1,3,2-dioxaphospholan-4-yl)methyl stearate	0.000248176	0.590524	NA	level4	ChemSpider	NA	NA	NA	NA	NA	NA	NA	NA	NA	Up	190486	186394	137777	2.43253e+06	1.60826e+06	1.9193e+06	2.8325e+06	3.47406e+06	4.69323e+06	5.3127e+06	3.98311e+06	3.94296e+06
9.706_553.33746	2.43467	0.0427117	0.173632	1.41473	LL200+HS:L200	NEG	9.706	553.337	C26 H52 N O9 P	O-{Hydroxy[(2R)-2-hydroxy-3-(icosanoyloxy)propoxy]phosphoryl}-L-serine	-0.000509715	-0.921165	NA	level4	ChemSpider	NA	NA	NA	NA	NA	NA	NA	NA	NA	Up	124982	137900	242065	1.56982e+06	1.22003e+06	1.64907e+06	850850	1.97359e+06	1.92552e+06	2.36766e+06	2.10794e+06	2.81115e+06
9.719_613.36122	2.60929	0.0148962	0.129347	1.31111	LL200+HS:L200	NEG	9.719	613.361	C36 H47 N5 O4	Indinavir	-0.00158275	-2.58045	NA	level4	ChemSpider	NA	NA	NA	NA	NA	NA	NA	NA	NA	Up	1.2234e+07	3.19234e+06	4.31612e+06	1.4538e+07	1.34155e+07	2.23936e+07	1.32588e+07	3.6999e+07	4.10585e+07	2.94151e+07	2.63468e+07	3.58056e+07
9.725_466.30588	0.0911743	0.0071419	0.107794	1.96063	LL200+HS:L200	NEG	9.725	466.306	C23 H47 O7 P	1-arachidoyl-sn-glycero-3-phosphate	-5.76255e-05	-0.123579	NA	level4	ChemSpider	NA	NA	NA	NA	NA	NA	NA	NA	NA	Down	6.89541e+07	2.04528e+07	4.81021e+06	5.48151e+06	2.18483e+06	1.37135e+07	5.75606e+06	1.54039e+06	1.32121e+06	617984	323814	980011
9.744_614.40050	1.93034	0.0389426	0.166888	1.1012	LL200+HS:L200	POS	9.744	614.4	C33 H58 O10	(3beta,5alpha,6alpha,15beta,24S)-3,6,8,15-Tetrahydroxycholestan-24-yl beta-D-glucopyranoside	-0.00249849	-4.06653	NA	level4	ChemSpider	NA	NA	NA	NA	NA	NA	NA	NA	NA	Up	1.05107e+06	4.1191e+06	2.92752e+06	4.59235e+06	1.68325e+06	1.17353e+06	6.62614e+06	2.10948e+06	6.00896e+06	6.00302e+06	4.76335e+06	4.49977e+06
9.757_334.15874	1.82309	0.0119155	0.12432	1.13828	LL200+HS:L200	POS	9.757	334.159	C19 H23 F O4	9-Fluoro-16alpha-hydroxyandrost-4-ene-3,11,17-trione	0.000703585	2.10555	NA	level4	ChemSpider	NA	NA	NA	NA	NA	NA	NA	NA	NA	Up	6.81878e+06	1.90202e+07	1.07276e+07	2.24401e+07	1.56585e+07	1.13782e+07	2.81653e+07	2.54438e+07	2.35499e+07	2.98294e+07	2.31781e+07	2.66984e+07
9.806_452.35026	0.412194	0.00274948	0.0732429	1.26099	LL200+HS:L200	NEG	9.806	452.35	C27 H48 O5	cyprinol	8.61244e-05	0.190393	NA	level4	ChemSpider	NA	NA	NA	NA	NA	NA	NA	NA	NA	Down	658558	566881	948764	597585	597164	1.50017e+06	171538	454296	310654	407930	237449	425156
9.82_549.37964	2.44193	0.0186677	0.136965	1.28615	LL200+HS:L200	POS	9.82	549.38	C28 H56 N O7 P	PAF C-18:1	0.000196226	0.357177	NA	level4	ChemSpider	NA	NA	NA	NA	NA	NA	NA	NA	NA	Up	9.14662e+06	7.1799e+06	8.36412e+06	2.57123e+07	2.94681e+07	4.53439e+07	2.96895e+07	4.16134e+07	4.36751e+07	4.0013e+07	9.11074e+07	5.96672e+07
9.829_507.33275	1.94218	0.0182513	0.136225	1.01552	LL200+HS:L200	POS	9.829	507.333	C27 H45 N3 O6	Elacytarabine	0.00191717	3.77894	NA	level4	ChemSpider	NA	NA	NA	NA	NA	NA	NA	NA	NA	Up	4.27296e+06	6.14114e+06	6.76655e+06	7.19163e+06	9.04624e+06	1.40793e+07	6.93964e+06	1.49793e+07	1.53109e+07	1.29267e+07	2.46718e+07	1.74209e+07
9.851_462.33267	0.282608	0.0033993	0.0801498	1.45324	LL200+HS:L200	POS	9.851	462.333	C28 H46 O5	stoloniferone F	-0.00185467	-4.01154	NA	level4	ChemSpider	NA	NA	NA	NA	NA	NA	NA	NA	NA	Down	468059	1.18752e+06	1.77362e+06	506271	673919	1.64945e+06	298568	302141	381832	158571	131755	495927
9.864_416.32866	0.0905683	0.0235923	0.147905	1.6669	LL200+HS:L200	POS	9.864	416.329	C27 H44 O3	Calcitriol	-0.00038425	-0.922948	NA	level4	ChemSpider	NA	NA	NA	NA	NA	NA	NA	NA	NA	Down	4.96663e+06	6.88387e+06	1.89759e+07	893167	1.10586e+06	680864	382593	719966	605261	293835	524004	508943
9.867_395.33986	0.120149	0.0344351	0.163416	1.5094	LL200+HS:L200	POS	9.867	395.34	C24 H45 N O3	N-oleoyl leucine	-8.41433e-05	-0.212838	NA	level4	ChemSpider	NA	NA	NA	NA	NA	NA	NA	NA	NA	Down	4.1927e+07	5.9605e+07	1.41361e+08	7.28223e+06	8.06323e+06	7.91399e+06	4.20931e+06	6.51812e+06	6.36857e+06	4.17032e+06	5.30231e+06	5.40933e+06
9.871_413.35036	0.156361	0.0389577	0.166888	1.39879	LL200+HS:L200	POS	9.871	413.35	C24 H47 N O4	O-heptadecanoylcarnitine	-0.000153086	-0.370355	NA	level4	ChemSpider	NA	NA	NA	NA	NA	NA	NA	NA	NA	Down	2.40694e+07	3.647e+07	7.98721e+07	5.94819e+06	4.98298e+06	5.51937e+06	3.3696e+06	5.18414e+06	5.03376e+06	3.26201e+06	4.59961e+06	3.07806e+06
9.888_429.32420	0.165859	0.0464839	0.178895	1.34638	LL200+HS:L200	POS	9.888	429.324	C27 H43 N O3	peiminine	-9.22074e-05	-0.214773	NA	level4	ChemSpider	NA	NA	NA	NA	NA	NA	NA	NA	NA	Down	5.61091e+07	8.42703e+07	1.69439e+08	1.11221e+07	1.17998e+07	1.2676e+07	7.92682e+06	1.2234e+07	1.23331e+07	7.40691e+06	9.17032e+06	8.21914e+06
9.9_312.15967	1.73481	0.0168868	0.133987	1.04189	LL200+HS:L200	POS	9.9	312.16	C17 H20 N4 O2	propamidine	0.00104275	3.34046	NA	level4	ChemSpider	NA	NA	NA	NA	NA	NA	NA	NA	NA	Up	2.00611e+06	3.84816e+06	3.03372e+06	6.26834e+06	5.84578e+06	5.08961e+06	7.98167e+06	6.12078e+06	9.83431e+06	7.31274e+06	6.67617e+06	7.33843e+06
9.955_422.35492	2.5028	0.0269592	0.153445	1.43519	LL200+HS:L200	POS	9.955	422.355	C30 H46 O	(3beta,5alpha,24S)-4-Methylenestigmasta-7,9(11),14-trien-3-ol	5.27847e-05	0.124977	NA	level4	ChemSpider	NA	NA	NA	NA	NA	NA	NA	NA	NA	Up	188056	548847	374370	2.51848e+06	716160	2.10228e+06	3.36113e+06	3.69472e+06	3.3776e+06	2.53336e+06	1.75918e+06	1.41253e+06
9.956_462.34800	3.0029	0.00991246	0.117186	1.43126	LL200+HS:L200	POS	9.956	462.348	C32 H46 O2	(7Z)-2-[5-(3-Heptyl-2-oxiranyl)-1,3-pentadiyn-1-yl]-7,9,9,11a-tetramethyl-4,4a,5,6,8,9,9a,10,11,11a-decahydrocyclobuta[6,7]cyclonona[1,2-b]pyran	-0.00178108	-3.85223	NA	level4	ChemSpider	NA	NA	NA	NA	NA	NA	NA	NA	NA	Up	179563	312746	506824	1.13659e+06	487231	957915	2.78829e+06	2.12322e+06	2.50061e+06	1.73311e+06	699017	908744

## Sheet: DMs in respose to LTA in HS
Differential metabolites (DMs) in response to LTA under HS were those owned by (LL200+HS vs. L200) when compare (LL200+HS vs. L200) to (HS vs. Control). It is also the gene in blue in Figure 5A.
Metabolite ID	Sample	Ion Mode	RT	Molecular Weight	Formula	Name	Delta Mass Da	Delta Mass ppm	Match	Level	Database	KEGG ID	HMDB ID	Super Class	Sub Class	Class	Final Class	Super Pathway	Sub Pathway	Pathway	State	Control-1	Control-3	Control-6	HS-1	HS-2	HS-3	HS-4	HS-6	L200-2	L200-3	L200-4	Control-2	Control-4	Control-5	HS-5	L200-1	L200-5	L200-6	LL200+HS-1	LL200+HS-2	LL200+HS-3	LL200+HS-4	LL200+HS-5	LL200+HS-6	Fold Change	pvalue	qvalue	VIP
0.625_232.02203	LL200+HS:L200	NEG	0.625	232.022	C4 H4 O4	Fumarate	NA	116.011	1e+06	level1	BMDB	C00122	HMDB0000134	Organic acids and derivatives	Dicarboxylic acids and derivatives	Carboxylic acids and derivatives	Organic acids	Carbohydrate metabolism	Citrate cycle (TCA cycle)	map00020 Citrate cycle (TCA cycle); map00190 Oxidative phosphorylation; map00220 Arginine biosynthesis; map00250 Alanine, aspartate and glutamate metabolism; map00350 Tyrosine metabolism; map00360 Phenylalanine metabolism; map00620 Pyruvate metabolism; map00643 Styrene degradation; map00650 Butanoate metabolism; map00720 Carbon fixation pathways in prokaryotes; map00760 Nicotinate and nicotinamid…	Down	365043	380384	206483	400147	464331	723911	491550	381304	847077	615561	332482	77561.1	72414.7	81062.8	70122.7	87028.5	79374.1	230478	88703.7	96506.2	80144.2	72853.8	87181.7	78217.1	0.229747	0.0384383	0.166515	1.32898
3.335_408.18001	LL200+HS:L200	POS	3.335	408.18	C11 H12 N2 O2	L-Tryptophan	NA	204.09	1e+06	level1	BMDB	C00078	HMDB0000929	Organoheterocyclic compounds	Indolyl carboxylic acids and derivatives	Indoles and derivatives	Amino acids	Amino acid metabolism	Glycine, serine and threonine metabolism	map00260 Glycine, serine and threonine metabolism; map00380 Tryptophan metabolism; map00400 Phenylalanine, tyrosine and tryptophan biosynthesis; map00404 Staurosporine biosynthesis; map00901 Indole alkaloid biosynthesis; map00966 Glucosinolate biosynthesis; map00970 Aminoacyl-tRNA biosynthesis; map00998 Biosynthesis of various secondary metabolites - part 2; map01060 Biosynthesis of plant seconda…	Down	3.8657e+07	3.78184e+07	4.18579e+07	2.42969e+07	1.81298e+07	2.57323e+07	2.18023e+07	1.50839e+07	2.13351e+07	4.59134e+07	4.32504e+07	7.57589e+06	6.95265e+06	5.31e+06	7.14465e+06	7.84947e+06	8.28601e+06	9.58073e+06	4.1508e+06	6.28807e+06	6.0075e+06	6.81634e+06	6.412e+06	4.29551e+06	0.249387	0.0181979	0.136225	1.35182
8.735_301.29794	LL200+HS:L200	POS	8.735	301.298	C18 H36 O2	Stearate	NA	17.0264	59894.9	level1	BMDB	C01530	HMDB0000827	Lipids and lipid-like molecules	Fatty acids and conjugates	Fatty Acyls	Fatty acyls[FA]	Lipid metabolism	Fatty acid biosynthesis	map00061 Fatty acid biosynthesis; map01040 Biosynthesis of unsaturated fatty acids; map01060 Biosynthesis of plant secondary metabolites; map04745 Phototransduction - fly	Up	2.40698e+06	942509	909535	615750	706306	3.08616e+06	332388	622677	1.39063e+06	1.07083e+06	1.17277e+06	3.81563e+06	6.15448e+06	4.46942e+06	4.0091e+06	2.09251e+06	2.91834e+06	3.19998e+06	4.83405e+06	3.144e+06	5.28155e+06	4.23207e+06	5.64435e+06	5.47708e+06	2.41562	0.00270076	0.0732429	1.33118
3.108_170.10571	LL200+HS:L200	POS	3.108	170.106	C8 H11 N O2	Octopamine	NA	17.0267	111228	level2	BMDB	C04227	HMDB0004825	Benzenoids	1-hydroxy-2-unsubstituted benzenoids	Phenols	Phenols and derivatives	NA	NA	map04080 Neuroactive ligand-receptor interaction	Down	4.71991e+06	8.67519e+06	1.25467e+07	9.70599e+06	6.14915e+06	1.0431e+07	3.98823e+06	6.69117e+06	7.40568e+06	1.76092e+07	1.17268e+07	1.46971e+06	1.43306e+06	1.36482e+06	695931	1.37329e+06	2.12556e+06	4.2232e+06	449729	1.44286e+06	974370	1.22611e+06	2.92506e+06	933198	0.178827	0.0120947	0.124379	1.58011
3.802_392.21590	LL200+HS:L200	POS	3.802	392.216	C20 H34 O6	Thromboxane B2	NA	21.9804	59368.6	level2	mzCloud	C05963	HMDB0003252	Lipids and lipid-like molecules	Eicosanoids	Fatty Acyls	Fatty acyls[FA]	Lipid metabolism	Arachidonic acid metabolism	map00590 Arachidonic acid metabolism; map01100 Metabolic pathways; map04726 Serotonergic synapse; map04976 Bile secretion	Down	464105	3.73075e+06	687377	1.75761e+06	2.64799e+06	2.83866e+06	1.70136e+06	3.11121e+06	5.40416e+06	7.74229e+06	8.86015e+06	818586	852849	1.72364e+06	1.68765e+06	2.15941e+06	3.30871e+06	3.39798e+06	938591	311085	726279	405139	1.73929e+06	1.55654e+06	0.183882	0.000771776	0.0356666	1.87129
4.352_406.23152	LL200+HS:L200	POS	4.352	406.232	C9 H17 N O4	O-ACETYLCARNITINE	NA	203.116	1e+06	level2	BMDB	C02571	HMDB0000201	Lipids and lipid-like molecules	Fatty acid esters	Fatty Acyls	Fatty acyls[FA]	NA	NA	map04931 Insulin resistance	Down	171113	6.25236e+06	1.09813e+06	2.17934e+06	3.65896e+06	2.16491e+06	1.30293e+06	5.01688e+06	4.90009e+06	8.5961e+06	7.75067e+06	97938.5	63536.4	352521	817316	398707	629486	830258	85276.2	90803.9	97102.4	54643.7	446102	120579	0.0387144	0.00223132	0.0674569	2.35861
4.56_226.07417	LL200+HS:L200	POS	4.56	226.074	C11 H12 N2 O2	DL-Tryptophan	NA	21.9843	107719	level2	mzCloud	C00806	HMDB0030396	Organoheterocyclic compounds	Indolyl carboxylic acids and derivatives	Indoles and derivatives	Indole and derivatives	NA	NA	NA	Down	911185	4.20471e+06	593707	3.53108e+06	1.8955e+06	532222	2.72746e+06	1.44651e+06	2.22967e+06	2.05656e+06	1.52892e+06	151941	200789	289527	532814	352553	176677	432456	111563	203340	86639.4	136319	274521	183856	0.147007	0.0127101	0.125383	1.66458
6.373_392.22016	LL200+HS:L200	NEG	6.373	392.22	C21 H30 O4	Corticosterone	NA	46.0057	132882	level2	mzCloud	C02140	HMDB0001547	Lipids and lipid-like molecules	Hydroxysteroids	Steroids and steroid derivatives	Steroids and derivatives	Lipid metabolism	Steroid hormone biosynthesis	map00140 Steroid hormone biosynthesis; map01100 Metabolic pathways; map04923 Regulation of lipolysis in adipocytes; map04925 Aldosterone synthesis and secretion; map05020 Prion diseases	Down	153883	207899	303044	1.85571e+06	3.396e+06	70449.4	7.69845e+06	3.28933e+07	3.67777e+06	340177	246845	198927	125277	149592	127768	361998	147613	326157	125299	209081	79682	143674	61841.8	84869.2	0.138112	0.0297159	0.156593	1.49845
7.725_271.25163	LL200+HS:L200	POS	7.725	271.252	C16 H30 O2	Palmitoleic acid	NA	17.027	66976.4	level2	BMDB	C08362	HMDB0003229	Lipids and lipid-like molecules	Fatty acids and conjugates	Fatty Acyls	Fatty acyls[FA]	Lipid metabolism	Fatty acid biosynthesis	map00061 Fatty acid biosynthesis	Up	3.69542e+07	1.00755e+07	1.48216e+07	7.13341e+06	7.23844e+06	3.23964e+07	3.67942e+06	1.02344e+07	1.75171e+07	1.40828e+07	1.09438e+07	5.67529e+07	5.50228e+07	5.36911e+07	4.67438e+07	4.29338e+07	4.87458e+07	3.58558e+07	5.24349e+07	4.35051e+07	4.64107e+07	4.92881e+07	6.46968e+07	5.66759e+07	1.84039	0.0315802	0.158883	1.07062
7.765_376.22312	LL200+HS:L200	POS	7.765	376.223	C20 H34 O5	5-trans prostaglandin F2β	NA	21.9825	62055.3	level2	mzCloud	NA	NA	NA	NA	NA	NA	NA	NA	NA	Down	1.07705e+06	5.01481e+06	5.77308e+06	1.58077e+07	2.62266e+07	428966	2.02102e+07	3.08384e+07	1.5055e+07	5.58309e+06	5.17981e+06	899331	924991	862286	1.08022e+06	840799	1.22427e+06	2.02575e+06	1.28069e+06	1.40657e+06	796063	703488	660378	777392	0.188059	0.0362537	0.164963	1.40435
8.994_428.26519	LL200+HS:L200	POS	8.994	428.265	C10 H18 N2 O3	Dethiobiotin	NA	214.133	1.00001e+06	level2	BMDB	C01909	HMDB0003581	Lipids and lipid-like molecules	Fatty acids and conjugates	Fatty Acyls	Fatty acyls[FA]	Metabolism of cofactors and vitamins	Biotin metabolism	map00780 Biotin metabolism; map01100 Metabolic pathways	Down	3.24427e+06	4.64914e+06	3.02569e+06	2.34012e+06	1.33933e+06	1.92751e+06	2.67203e+06	480330	1.60731e+06	2.31055e+06	3.33144e+06	109688	120747	69988.1	217589	93260.1	85114.9	222048	89280.2	76799.7	80860.3	109555	73092.9	74211.9	0.0658586	0.0417158	0.172093	1.66154
9.096_433.26520	LL200+HS:L200	NEG	9.096	433.265	C22 H39 N O5	Prostaglandin E1 Ethanolamide	NA	35.9824	90571.2	level2	mzCloud	NA	NA	NA	NA	NA	NA	NA	NA	NA	Down	1.57115e+07	1.64256e+07	1.45715e+07	8.38628e+06	6.56084e+06	5.31579e+06	8.2117e+06	4.80284e+06	4.59745e+06	6.48197e+06	9.22831e+06	1.7352e+06	728450	1.63319e+06	3.04207e+06	2.47116e+06	1.78729e+06	2.39998e+06	477893	1.93708e+06	1.12426e+06	1.10824e+06	1.61559e+06	1.12145e+06	0.273843	0.00486668	0.097194	1.44813
9.237_349.26166	LL200+HS:L200	POS	9.237	349.262	C21 H32 O3	(+/-)17(18)-EpETE methyl ester	NA	17.0265	51248.4	level2	mzCloud	NA	NA	NA	NA	NA	NA	NA	NA	NA	Down	7.53841e+06	1.8428e+07	18466293	1.15414e+07	5.78835e+06	6.81324e+06	1.04403e+07	3.70298e+06	7.17234e+06	7.78446e+06	1.29e+07	1.59646e+06	778805	1.39961e+06	1.93113e+06	1.72884e+06	1.49834e+06	1.70723e+06	705995	1.03333e+06	1.11944e+06	1.08843e+06	1.06974e+06	1.11149e+06	0.186893	0.0178412	0.135455	1.49713
9.374_433.26530	LL200+HS:L200	POS	9.374	433.265	C25 H33 F O4	AL 8810 Methyl ester	NA	17.029	40911.9	level2	mzCloud	NA	NA	NA	NA	NA	NA	NA	NA	NA	Down	1.91351e+07	2.17398e+07	1.63638e+07	8.48263e+06	5.59205e+06	5.47768e+06	8.2945e+06	2.53535e+06	4.19987e+06	7.75609e+06	1.01363e+07	1.31341e+06	482585	987227	1.56082e+06	1.59155e+06	1.09361e+06	1.39979e+06	225651	1.13097e+06	616714	801285	1.01534e+06	721780	0.172354	0.00985798	0.116818	1.57889
9.42_369.28821	LL200+HS:L200	NEG	9.42	369.288	C20 H37 N O2	Linoleoyl ethanolamide	NA	46.0058	142308	level2	mzCloud	NA	NA	NA	NA	NA	NA	NA	NA	NA	Down	7.41394e+06	8.70602e+06	8.53451e+06	3.3394e+06	5.36876e+06	3.78857e+06	4.03552e+06	8.21198e+06	8.60486e+06	5.87601e+06	1.42007e+07	2.43811e+06	1.97326e+06	2.03142e+06	5.04302e+06	9.05067e+06	9.88937e+06	7.38987e+06	3.42836e+06	2.59633e+06	2.10064e+06	2.73229e+06	4.91693e+06	2.38566e+06	0.330117	7.71e-05	0.0069073	1.5513
9.67_353.29208	LL200+HS:L200	POS	9.67	353.292	C22 H37 N O2	Anandamide (AEA)	NA	6.00966	17304.8	level2	mzCloud	C11695	HMDB0004080	Organic nitrogen compounds	Amines	Organonitrogen compounds	Amines	NA	NA	map04080 Neuroactive ligand-receptor interaction; map04361 Axon regeneration; map04714 Thermogenesis; map04723 Retrograde endocannabinoid signaling; map04750 Inflammatory mediator regulation of TRP channels	Down	7.82632e+07	1.58257e+08	1.08199e+08	8.33583e+07	6.78168e+07	6.76429e+07	1.02689e+08	4.71421e+07	1.04174e+08	7.78037e+07	3.83348e+08	1.18232e+07	9.72973e+06	9.44486e+06	1.65765e+07	1.60354e+07	1.55638e+07	1.33833e+07	7.13048e+06	9.77736e+06	1.19296e+07	1.30432e+07	8.8586e+06	1.25763e+07	0.103743	0.0413568	0.171457	1.49746
9.804_381.32416	LL200+HS:L200	POS	9.804	381.324	C23 H40 O3	2-Arachidonyl glycerol ether	NA	17.0264	46737.6	level2	mzCloud	NA	NA	NA	NA	NA	NA	NA	NA	NA	Down	3.65375e+07	3.81909e+07	2.78265e+07	2.3622e+07	1.57834e+07	1.29339e+07	2.10455e+07	1.01604e+07	2.08054e+07	2.32685e+07	5.2148e+07	4.66116e+06	1.20255e+06	1.06306e+06	2.52397e+06	2.11431e+06	2.38732e+06	2.55229e+06	1.03847e+06	2.13237e+06	2.01199e+06	1.43222e+06	1.55832e+06	1.60031e+06	0.0946368	0.0351887	0.164322	1.58748
0.561_111.07970	LL200+HS:L200	POS	0.561	111.08	C5 H9 N3	Histamine	NA	5.08e-05	0.457302	level3	BMDB	C00388	HMDB0000870	Organic nitrogen compounds	Amines	Organonitrogen compounds	Amines	Amino acid metabolism	Histidine metabolism	map00340 Histidine metabolism; map01065 Biosynthesis of alkaloids derived from histidine and purine; map01100 Metabolic pathways; map01110 Biosynthesis of secondary metabolites; map04080 Neuroactive ligand-receptor interaction; map04664 Fc epsilon RI signaling pathway; map04721 Synaptic vesicle cycle; map04750 Inflammatory mediator regulation of TRP channels; map04971 Gastric acid secretion; map0…	Up	7.30167e+06	4.71124e+06	3.89212e+06	4.30299e+06	2.03307e+06	9.72922e+06	3.23355e+06	1.67678e+06	2.15578e+06	4.42908e+06	5.02751e+06	1.04226e+07	1.5012e+07	7.65457e+06	1.49828e+07	5.81771e+06	1.17369e+07	9.41304e+06	1.71653e+07	8.01143e+06	1.6421e+07	2.01511e+07	1.46503e+07	6.44942e+06	2.14744	0.0249299	0.150095	1.13709
0.568_206.04262	LL200+HS:L200	NEG	0.568	206.043	C8 H14 O2 S2	Lipoic acid	NA	-0.000898507	-4.36076	level3	mzCloud	C16241	HMDB0001451	Organoheterocyclic compounds	Lipoic acids and derivatives	Dithiolanes	Organoheterocyclic compounds	Metabolism of cofactors and vitamins	Lipoic acid metabolism	map00785 Lipoic acid metabolism; map01100 Metabolic pathways	Up	755454	965117	551016	492424	518458	749584	443571	522540	382876	631725	580328	1.52384e+06	784289	1.33211e+06	2.49876e+06	979927	1.32448e+06	1.17326e+06	1.58432e+06	1.52218e+06	2.04292e+06	2.76658e+06	2.46863e+06	1.48433e+06	2.33982	0.00370363	0.0833587	1.31024
0.571_305.19539	LL200+HS:L200	POS	0.571	305.195	C18 H27 N O3	Capsaicin	NA	-0.00370313	-12.1335	level3	mzCloud	C06866	HMDB0002227	Benzenoids	Methoxyphenols	Phenols	Phenols and derivatives	Biosynthesis of other secondary metabolites	Biosynthesis of various secondary metabolites - part 2	map00998 Biosynthesis of various secondary metabolites - part 2; map01060 Biosynthesis of plant secondary metabolites; map01063 Biosynthesis of alkaloids derived from shikimate pathway; map01100 Metabolic pathways; map01110 Biosynthesis of secondary metabolites; map04750 Inflammatory mediator regulation of TRP channels	Down	1.35113e+06	4.0276e+06	4.25005e+06	3.53803e+06	2.74546e+06	100444	4.11841e+06	2.13224e+06	4.50955e+06	1.9782e+06	4.99226e+06	88838.5	46855.9	366150	155216	281231	319025	680330	409181	156205	190767	54055.1	250699	222057	0.100541	0.0143878	0.128229	1.79093
0.595_185.99285	LL200+HS:L200	NEG	0.595	185.993	C3 H7 O7 P	3-Phosphoglyceric acid	NA	-8.55e-05	-0.459428	level3	mzCloud	C00597	HMDB0000807	Organic oxygen compounds	Carbohydrates and carbohydrate conjugates	Organooxygen compounds	Carbohydrates	NA	NA	NA	Up	175215	109454	112065	102106	66257	1.35732e+06	100235	76871.7	71503.2	145138	108089	1.28995e+07	1.78643e+07	2.42577e+07	1.02741e+07	1.79323e+07	8.04818e+06	5.67784e+06	4.80622e+07	2.52238e+07	1.84673e+07	1.77056e+07	1.06059e+07	1.8931e+07	4.34593	0.0300322	0.156593	2.21216
0.639_132.05353	LL200+HS:L200	NEG	0.639	132.054	C4 H8 N2 O3	L-Asparagine	NA	3.9e-05	0.295082	level3	BMDB	C00152	HMDB0000168	Organic acids and derivatives	Amino acids, peptides, and analogues	Carboxylic acids and derivatives	Amino acids	Amino acid metabolism	Alanine, aspartate and glutamate metabolism	map00250 Alanine, aspartate and glutamate metabolism; map00460 Cyanoamino acid metabolism; map00970 Aminoacyl-tRNA biosynthesis; map01060 Biosynthesis of plant secondary metabolites; map01100 Metabolic pathways; map01110 Biosynthesis of secondary metabolites; map01230 Biosynthesis of amino acids; map04974 Protein digestion and absorption; map04978 Mineral absorption; map05230 Central carbon metab…	Down	1.0315e+07	2.64631e+07	6.99773e+07	6.72699e+07	4.23177e+07	5.06873e+07	3.37786e+07	3.15621e+07	7.02175e+07	1.222e+08	4.96425e+07	2.40453e+07	2.88489e+07	3.07814e+07	3.76799e+07	3.16591e+07	3.92771e+07	6.14877e+07	2.67016e+07	1.41229e+07	1.80145e+07	1.87561e+07	2.9857e+07	1.6512e+07	0.331027	0.00166498	0.0574276	1.41792
0.653_145.11025	LL200+HS:L200	POS	0.653	145.11	C7 H15 N O2	Acetylcholine	NA	-3.15e-05	-0.216948	level3	mzCloud	C01996	HMDB0000895	Organic nitrogen compounds	Quaternary ammonium salts	Organonitrogen compounds	Organic nitrogen compounds	Lipid metabolism	Glycerophospholipid metabolism	map00564 Glycerophospholipid metabolism; map04024 cAMP signaling pathway; map04080 Neuroactive ligand-receptor interaction; map04721 Synaptic vesicle cycle; map04725 Cholinergic synapse; map04742 Taste transduction; map04810 Regulation of actin cytoskeleton; map04911 Insulin secretion; map04970 Salivary secretion; map04971 Gastric acid secretion; map04972 Pancreatic secretion; map04976 Bile secre…	Up	1.72661e+07	2.16461e+07	2.27245e+07	1.17464e+07	1.45853e+07	3.72761e+07	1.24672e+07	1.46614e+07	9.51953e+06	2.57149e+06	1.68754e+07	2.1795e+07	2.75232e+07	2.86132e+07	1.25289e+07	2.42443e+07	3.25249e+07	2.78086e+07	5.64374e+07	3.96973e+07	6.32076e+07	3.12324e+07	3.91351e+07	4.69515e+07	2.43659	0.0321554	0.159765	1.29369
0.655_161.10510	LL200+HS:L200	POS	0.655	161.105	C7 H15 N O3	DL-Carnitine	NA	-9.48e-05	-0.588201	level3	mzCloud	NA	NA	NA	NA	NA	NA	NA	NA	NA	Up	3.5431e+08	5.86748e+08	5.95819e+08	2.90904e+08	4.08056e+08	6.88051e+08	3.4807e+08	4.31012e+08	2.87359e+08	4.21521e+08	3.74165e+08	7.47603e+08	5.79869e+08	1088778886	6.69724e+08	1254128909	9.27459e+08	9.3844e+08	1849181680	1276391839	1227356664	1130113634	8.53346e+08	1150113148	1.7812	0.0365846	0.164963	1.03508
0.667_117.07894	LL200+HS:L200	POS	0.667	117.079	C5 H11 N O2	Betaine	NA	-3.93e-05	-0.335954	level3	mzCloud	C00719	HMDB0000043	Organic acids and derivatives	Amino acids, peptides, and analogues	Carboxylic acids and derivatives	Amino acids, peptides, and analogues	Amino acid metabolism	Glycine, serine and threonine metabolism	map00260 Glycine, serine and threonine metabolism; map01100 Metabolic pathways; map02010 ABC transporters	Up	8.93481e+08	1255875892	1554022309	1252705504	8.71566e+08	2207217260	9.14044e+08	1309800678	6.88642e+08	2000609032	1524543227	3056753447	7084919671	7552661573	9645296784	7054468174	7458075976	3018985920	11911790687	9458767486	11028107903	10611185825	8765015640	12453376346	2.95366	0.013435	0.127337	1.60573
0.676_226.10646	LL200+HS:L200	NEG	0.676	226.106	C9 H14 N4 O3	Carnosine	NA	-0.000130218	-0.575913	level3	BMDB	C00386	HMDB0000033	Organic acids and derivatives	Hybrid peptides	Peptidomimetics	Organic acids	Amino acid metabolism	Histidine metabolism	map00340 Histidine metabolism; map00410 beta-Alanine metabolism; map01100 Metabolic pathways	Down	148834	495107	2.64887e+06	3.15013e+06	1.50707e+06	438979	3.14368e+06	1.44151e+06	2.83369e+06	5.46777e+06	3.04511e+06	533704	147556	357182	290255	214816	283519	489964	186814	178141	172280	182750	182086	145038	0.0848902	0.0243229	0.149934	1.71587
0.681_174.06392	LL200+HS:L200	POS	0.681	174.064	C6 H10 N2 O4	N-alpha-acetyl-l-asparagine	NA	-0.000139779	-0.803031	level3	BMDB	NA	HMDB0006028	Organic acids and derivatives	Amino acids, peptides, and analogues	Carboxylic acids and derivatives	Amino acids, peptides, and analogues	NA	NA	NA	Down	6.61609e+08	6.91285e+08	6.03811e+08	5.07125e+08	3.71352e+08	725744	7.50907e+08	4.39339e+08	4.78374e+08	6.35349e+08	6.1771e+08	8.82715e+07	7.60755e+07	1.12857e+08	2.26927e+08	3.82174e+08	4.24986e+08	3.14591e+08	2.24338e+08	3.34586e+08	3.60282e+08	1.37989e+08	1.15263e+08	1.53505e+08	0.464731	0.00609827	0.104113	1.18362
0.684_131.06946	LL200+HS:L200	NEG	0.684	131.069	C4 H9 N3 O2	Creatine	NA	-1.28e-05	-0.0977957	level3	BMDB	C00300	HMDB0000064	Organic acids and derivatives	Amino acids, peptides, and analogues	Carboxylic acids and derivatives	Amino acids, peptides, and analogues	Amino acid metabolism	Glycine, serine and threonine metabolism	map00260 Glycine, serine and threonine metabolism; map00330 Arginine and proline metabolism; map01100 Metabolic pathways	Up	4.01129e+06	8.15869e+06	8.10369e+06	2.4767e+06	4.00349e+06	4.18013e+06	3.67549e+06	4.44106e+06	1.83065e+06	3.46071e+06	1.52559e+06	5.80358e+06	6.79836e+06	5.51501e+06	7547789	6.05921e+06	3.06531e+06	5.64661e+06	2.1527e+07	1.23123e+07	1.34268e+07	1.40008e+07	1.20508e+07	9.45604e+06	3.83423	0.000730865	0.0346023	1.72749
0.691_172.08469	LL200+HS:L200	POS	0.691	172.085	C7 H12 N2 O3	Prolylglycine	NA	-0.000106731	-0.620221	level3	mzCloud	NA	NA	NA	NA	NA	NA	NA	NA	NA	Down	6.09382e+06	1.34924e+07	1.98859e+07	1.55027e+07	1.4545e+07	8.87463e+06	7.0638e+06	1.31055e+07	1.63365e+07	2.01288e+07	2.63364e+07	8.45531e+06	9.81154e+06	7.74244e+06	1.4178e+07	1.75253e+07	1.36927e+07	1.4067e+07	5.01252e+06	7.48941e+06	1.05032e+07	6.26004e+06	1.44019e+07	9.26128e+06	0.489685	0.00313025	0.0769288	1.1715
0.697_156.05348	LL200+HS:L200	POS	0.697	156.053	C6 H6 N2 O2	Urocanate	NA	18.0106	130471	level3	BMDB	C00785	HMDB0000301	Organoheterocyclic compounds	Imidazoles	Azoles	Imidazoles	Amino acid metabolism	Histidine metabolism	map00340 Histidine metabolism; map01100 Metabolic pathways	Down	1.24705e+08	1.35439e+08	1.85813e+08	1.33849e+08	8.92458e+07	7.10388e+07	1.22733e+08	4.10891e+07	5.5255e+07	1.59807e+08	1.20001e+08	8.91679e+06	9.14556e+06	8.49921e+06	3.36267e+07	2.74811e+07	3.2958e+07	3.6266e+07	1.76592e+07	2.82214e+07	2.35717e+07	1.27206e+07	1.38074e+07	1.05327e+07	0.24669	0.0070477	0.107668	1.43712
0.698_143.09472	LL200+HS:L200	POS	0.698	143.095	C7 H13 N O2	DL-Stachydrine	NA	9.07e-05	0.63368	level3	mzCloud	NA	NA	NA	NA	NA	NA	NA	NA	NA	Up	4.24114e+07	3.02149e+07	3.38818e+07	3.86748e+07	2.08272e+07	1.1185e+08	2.29291e+07	2.42981e+07	1.01568e+07	947904	3.82641e+07	5.31858e+07	1.44932e+08	1.42399e+08	4.27364e+07	6.93545e+07	8.58609e+07	3.36974e+07	2.48161e+08	6.65212e+07	7.52757e+07	1.54656e+08	1.7121e+08	3.66216e+08	4.54101	0.0322319	0.159765	1.69342
0.709_136.03858	LL200+HS:L200	NEG	0.709	136.039	C4 H8 O5	L-Threonic acid	NA	0.00140975	10.3629	level3	mzCloud	C01620	HMDB0000943	Organic oxygen compounds	Carbohydrates and carbohydrate conjugates	Organooxygen compounds	Carbohydrates	Carbohydrate metabolism	Ascorbate and aldarate metabolism	map00053 Ascorbate and aldarate metabolism; map01100 Metabolic pathways	Up	2.58511e+06	1.18298e+06	166320	267318	116288	2.53118e+06	133888	117628	128937	9.27588e+06	177373	1.70707e+07	1.13796e+07	2.85861e+07	4.91102e+06	2.49184e+06	9.32807e+06	1.41261e+06	3.47135e+07	1.94998e+06	1.64848e+07	4.78084e+06	3.38262e+07	3.50339e+07	5.55735	0.0345598	0.163857	1.87141
0.719_245.17382	LL200+HS:L200	POS	0.719	245.174	C11 H20 N2 O3	Leucylproline	NA	17.0264	74629.1	level3	mzCloud	NA	NA	NA	NA	NA	NA	NA	NA	NA	Down	2.92149e+06	7.22386e+06	8.81227e+06	3.23351e+06	2.29562e+06	4.38662e+06	4.71756e+06	7.40053e+06	4.96617e+06	2.45907e+07	1.2323e+07	2.06323e+06	1.32321e+06	727332	1.24015e+06	1.73599e+06	2.88718e+06	2.97699e+06	2.39193e+06	735450	1.67576e+06	2.14049e+06	2.16706e+06	838240	0.20107	0.0269064	0.153445	1.35283
0.926_122.04777	LL200+HS:L200	POS	0.926	122.048	C6 H6 N2 O	Nicotinamide	NA	-0.000247575	-2.0285	level3	mzCloud	C00153	HMDB0001406	Organoheterocyclic compounds	Pyridinecarboxylic acids and derivatives	Pyridines and derivatives	Pyridine and derivatives	Metabolism of cofactors and vitamins	Nicotinate and nicotinamide metabolism	map00760 Nicotinate and nicotinamide metabolism; map01100 Metabolic pathways; map04212 Longevity regulating pathway - worm; map04977 Vitamin digestion and absorption	Up	4116240803	2883950955	2920194655	2059147303	2398039926	4751198860	2934933886	2611555341	2062674602	3054703786	3518302887	6652702019	6761866520	6096791663	6446951221	6697575064	6423650004	6024839247	6652283535	8588761906	8086519157	8382126411	7169799496	7955689859	1.68583	0.0265258	0.152383	1.01153
1.061_136.03853	LL200+HS:L200	POS	1.061	136.039	C5 H4 N4 O	Hypoxanthine	NA	2.34e-05	0.17178	level3	mzCloud	C00262	HMDB0000157	Organoheterocyclic compounds	Purines and purine derivatives	Imidazopyrimidines	Purines and derivatives	Nucleotide metabolism	Purine metabolism	map00230 Purine metabolism; map01100 Metabolic pathways	Up	2.71534e+07	374655	747895	1.51395e+06	813924	1.4794e+08	1.98433e+06	213832	474987	5.31221e+06	938247	1.59424e+08	1.25115e+08	205522947	4.15972e+07	2.52492e+07	7.01604e+07	1.4768e+07	3.48292e+08	1.91925e+07	1.55909e+08	4.73707e+07	270960882	2.78897e+08	9.58591	0.0116302	0.122764	2.25133
1.159_152.03327	LL200+HS:L200	NEG	1.159	152.033	C5 H4 N4 O2	Xanthine	NA	-0.000151883	-0.999012	level3	mzCloud	C00385	HMDB0000292	Organoheterocyclic compounds	Purines and purine derivatives	Imidazopyrimidines	Purines and derivatives	Nucleotide metabolism	Purine metabolism	map00230 Purine metabolism; map00232 Caffeine metabolism; map01060 Biosynthesis of plant secondary metabolites; map01065 Biosynthesis of alkaloids derived from histidine and purine; map01100 Metabolic pathways; map01110 Biosynthesis of secondary metabolites; map01120 Microbial metabolism in diverse environments	Up	1.47253e+08	1.5866e+06	2.2897e+06	5.25745e+07	3.77293e+06	1.32516e+08	2.44954e+07	1.52219e+06	6.00339e+06	1.22504e+08	3.36856e+07	3.02875e+08	2.17741e+08	3.22257e+08	1.09891e+08	7.27331e+07	1.87689e+08	4.78087e+07	4.10784e+08	6.09755e+07	3.06872e+08	1.2989e+08	3.63847e+08	3.18564e+08	3.38191	0.0334837	0.161575	1.52905
1.186_131.09441	LL200+HS:L200	NEG	1.186	131.094	C6 H13 N O2	DL-β-Leucine	NA	-0.000220075	-1.67875	level3	mzCloud	C02486	NA	NA	NA	NA	NA	NA	NA	NA	Down	3205925670	3724448035	3455088488	2590916992	2083924876	2340087610	2673775772	2412398647	2451339327	3627433460	3968154676	1124325161	1091244510	1171938123	1359774663	1410427238	1151306818	1484141784	1079002968	1083609127	9.84222e+08	1170136650	1197709532	8.85663e+08	0.454157	0.0233644	0.147212	1.04019
1.6_188.11604	LL200+HS:L200	NEG	1.6	188.116	C8 H16 N2 O3	Glycyl-L-leucine	NA	-5.66e-05	-0.301049	level3	mzCloud	C02155	HMDB0000759	Organic acids and derivatives	Amino acids, peptides, and analogues	Carboxylic acids and derivatives	Amino acids, peptides, and analogues	NA	NA	NA	Down	1.26558e+07	2.40436e+07	3.21722e+07	2.52063e+07	1.72984e+07	1.54578e+07	2.42163e+07	1.66561e+07	2.10387e+07	2.84436e+07	3.86137e+07	3.86426e+06	3.6986e+06	3.86841e+06	5.10992e+06	5.14489e+06	6.00454e+06	1.08247e+07	2.36495e+06	3.76726e+06	2.99402e+06	3.02733e+06	2.51183e+06	2.40993e+06	0.155131	0.00457661	0.0949899	1.75004
1.828_347.06314	LL200+HS:L200	POS	1.828	347.063	C10 H14 N5 O7 P	Deoxyguanosine monophosphate	NA	5.25e-05	0.151238	level3	BMDB	C00362	HMDB0001044	Nucleosides, nucleotides, and analogues	Purine deoxyribonucleotides	Purine nucleotides	Purines and derivatives	Nucleotide metabolism	Purine metabolism	map00230 Purine metabolism; map01100 Metabolic pathways	Up	924081	799711	1.09271e+06	1.08823e+06	497240	1.12805e+06	541369	536664	537376	1.96627e+06	823385	126449925	1.07073e+08	9.68072e+07	1.2747e+08	1.2197e+08	107203093	8.71727e+07	179693746	1.68304e+08	181979458	1.52054e+08	1.58364e+08	1.56403e+08	3.11818	0.0460257	0.178119	2.06659
1.845_153.04266	LL200+HS:L200	POS	1.845	153.043	C7 H7 N O3	3-hydroxyanthranilate	NA	6.47e-05	0.422672	level3	BMDB	C00632	HMDB0001476	Benzenoids	Benzoic acids and derivatives	Benzene and substituted derivatives	Benzene and derivatives	Amino acid metabolism	Tryptophan metabolism	map00380 Tryptophan metabolism; map00627 Aminobenzoate degradation; map01100 Metabolic pathways; map01120 Microbial metabolism in diverse environments	Up	1.48462e+07	1.80028e+07	2.11165e+07	1.31009e+07	1.862e+07	1.09226e+07	2.77173e+06	2.23339e+07	9.10198e+06	2.74575e+07	1.86584e+07	4.62276e+07	7.03563e+07	5.5173e+07	4.19658e+07	1.95687e+07	4.65556e+07	4.10379e+07	125374661	4.41189e+07	5.56106e+07	3.97268e+07	5.51071e+07	6.29583e+07	2.35803	0.0129914	0.125881	1.24241
1.867_159.08951	LL200+HS:L200	NEG	1.867	159.09	C7 H13 N O3	N-Isovalerylglycine	NA	-2.98e-05	-0.187419	level3	mzCloud	NA	HMDB0000678	Organic acids and derivatives	Amino acids, peptides, and analogues	Carboxylic acids and derivatives	Amino acids, peptides, and analogues	NA	NA	NA	Down	6.29477e+06	2.8633e+07	1.8383e+07	1.11127e+07	1.27894e+07	2.23612e+06	1.02732e+07	1.10165e+07	2.10492e+07	2.84939e+07	1.45604e+07	1.94329e+06	1.44616e+06	2.79932e+06	2.69709e+06	2.24848e+06	2.15128e+06	2.55696e+06	1.91311e+06	2.52022e+06	2.19305e+06	1.16157e+06	1.49167e+06	1.25142e+06	0.148199	0.0355472	0.164578	1.45858
1.901_267.09680	LL200+HS:L200	POS	1.901	267.097	C10 H13 N5 O4	Adenosine	NA	4.22e-05	0.157929	level3	BMDB	C00212	HMDB0000050	Nucleosides, nucleotides, and analogues	NA	Purine nucleosides	Purines and derivatives	Nucleotide metabolism	Purine metabolism	map00230 Purine metabolism; map01100 Metabolic pathways; map02010 ABC transporters; map04022 cGMP-PKG signaling pathway; map04024 cAMP signaling pathway; map04071 Sphingolipid signaling pathway; map04080 Neuroactive ligand-receptor interaction; map04270 Vascular smooth muscle contraction; map04923 Regulation of lipolysis in adipocytes; map04924 Renin secretion; map05012 Parkinson disease; map0503…	Up	5.56529e+06	3.61718e+06	4.23316e+06	1.97272e+06	2.9876e+06	5.78521e+06	2.47857e+06	2.73873e+06	1.51315e+06	4.40896e+06	5.53608e+06	1.97046e+07	2.61863e+07	2.68359e+07	2.18744e+07	1.58999e+07	1.60944e+07	1.0522e+07	2.97783e+07	1.60031e+07	2.2317e+07	1.881e+07	1.92659e+07	2.96487e+07	2.51643	0.0238008	0.148367	1.41085
1.931_217.13150	LL200+HS:L200	POS	1.931	217.131	C10 H19 N O4	Propionylcarnitine	NA	9.19e-05	0.423409	level3	mzCloud	C03017	HMDB0000824	Lipids and lipid-like molecules	Fatty acid esters	Fatty Acyls	Fatty acyls[FA]	NA	NA	NA	Up	3.64262e+07	2.28506e+07	3.43805e+07	3.0072e+07	9.95327e+06	6.4402e+07	3.96481e+07	3.5232e+06	4.18056e+06	6.52364e+06	7.20967e+06	2.84478e+07	9.98255e+06	2.43108e+07	4.51652e+07	2.35551e+07	1.52367e+07	1.45632e+07	37148571	9.27133e+07	3.77763e+07	6.26058e+07	3.61729e+07	3.76897e+07	4.26703	0.000964891	0.0409074	1.7709
10.315_312.30288	LL200+HS:L200	NEG	10.315	312.303	C20 H40 O2	Arachidic acid	NA	4.81e-05	0.15388	level3	mzCloud	C06425	HMDB0002212	Lipids and lipid-like molecules	Fatty acids and conjugates	Fatty Acyls	Fatty acyls[FA]	Lipid metabolism	Biosynthesis of unsaturated fatty acids	map01040 Biosynthesis of unsaturated fatty acids	Up	1.41936e+06	760307	768327	642004	576510	1.61397e+06	362759	752846	1.04621e+06	911002	837699	1.50201e+06	1.96716e+06	2.03691e+06	2.49795e+06	1.61374e+06	1.56122e+06	1.82478e+06	1.81401e+06	2.1387e+06	2.54814e+06	2.04035e+06	3.14746e+06	2.27456e+06	1.79138	0.00444472	0.093722	1.0379
10.354_338.31862	LL200+HS:L200	NEG	10.354	338.319	C22 H42 O2	Erucic acid	NA	0.000137323	0.405899	level3	mzCloud	C08316	HMDB0002068	Lipids and lipid-like molecules	Fatty acids and conjugates	Fatty Acyls	Fatty acyls[FA]	Lipid metabolism	Biosynthesis of unsaturated fatty acids	map01040 Biosynthesis of unsaturated fatty acids	Up	4.59182e+06	1.49249e+06	1.52701e+06	1.38168e+06	1.43625e+06	3.15812e+06	685839	2.85051e+06	2.4577e+06	1.59618e+06	1.20604e+06	2.91024e+06	3.58014e+06	2.68145e+06	6.5766e+06	2.48482e+06	2.48408e+06	4.26055e+06	2.97437e+06	4.1682e+06	4.58785e+06	5.60766e+06	6.24715e+06	4.04615e+06	1.90701	0.00957214	0.114824	1.0598
10.439_310.28704	LL200+HS:L200	POS	10.439	310.287	C20 H38 O2	Ethyl oleate	NA	-0.000136263	-0.439151	level3	mzCloud	D04090	NA	NA	NA	NA	NA	NA	NA	NA	Down	2.93885e+07	2.42292e+07	1.37603e+07	3.44657e+06	2.94096e+08	1.42213e+08	1.42788e+07	3.38308e+06	6.10423e+08	2.22383e+07	279663897	8.33035e+07	489888	1.29165e+06	1.45112e+06	1.02139e+06	8.7559e+06	5.53532e+06	1.4964e+06	1.76006e+06	1.13457e+06	598484	1.9049e+06	906284	0.0084092	0.0292656	0.156593	2.25123
10.726_366.35004	LL200+HS:L200	NEG	10.726	366.35	C24 H46 O2	Nervonic acid	NA	0.000259103	0.707255	level3	mzCloud	C08323	HMDB0002368	Lipids and lipid-like molecules	Fatty acids and conjugates	Fatty Acyls	Fatty acyls[FA]	Lipid metabolism	Biosynthesis of unsaturated fatty acids	map01040 Biosynthesis of unsaturated fatty acids	Up	3.77021e+06	1.18839e+06	1.26565e+06	1.29374e+06	901018	2.68731e+06	543070	2.34944e+06	1.25314e+06	1.59219e+06	947594	2.97681e+06	3.85963e+06	3.90251e+06	6.12016e+06	2.96298e+06	3.012e+06	3.09857e+06	5.10343e+06	4.24007e+06	6.17117e+06	6.03136e+06	5.5841e+06	4.63912e+06	2.46915	0.00420892	0.0914392	1.38909
11.209_702.56768	LL200+HS:L200	POS	11.209	702.568	C39 H79 N2 O6 P	Palmitoyl sphingomyelin	NA	0.000101119	0.143927	level3	mzCloud	NA	NA	NA	NA	NA	NA	NA	NA	NA	Up	1.76953e+07	2.11972e+07	2.10194e+07	1.50057e+07	1.28886e+07	4.71904e+07	7.60582e+06	2.4794e+07	1.98932e+07	9.19204e+06	2.47255e+07	9.27587e+07	8.35996e+07	115641610	1.11915e+08	5.64357e+07	7.19455e+07	7.15006e+07	9.65146e+07	8.48717e+07	1.03534e+08	8.3206e+07	1.17138e+08	1.17684e+08	2.37669	0.0222491	0.14426	1.32207
11.816_733.56240	LL200+HS:L200	POS	11.816	733.562	C40 H80 N O8 P	DL-Dipalmitoylphosphatidylcholine	NA	0.000246816	0.336462	level3	mzCloud	NA	NA	NA	NA	NA	NA	NA	NA	NA	Up	4.22924e+07	2.44244e+07	2.41837e+07	2.07616e+07	1.4542e+07	4.91251e+07	8.55629e+06	2.8033e+07	2.12585e+07	1.91514e+07	2.2485e+07	6.37354e+07	6.96085e+07	8.0896e+07	9.32202e+07	4.82437e+07	4.1496e+07	5.76577e+07	6.90293e+07	6.07587e+07	6.56132e+07	7.21744e+07	8.79516e+07	8.03241e+07	2.0726	0.00742912	0.10905	1.21053
2.451_284.07563	LL200+HS:L200	POS	2.451	284.076	C10 H12 N4 O6	Xanthosine	NA	-5.1e-05	-0.179395	level3	BMDB	C01762	HMDB0000299	Nucleosides, nucleotides, and analogues	NA	Purine nucleosides	Purines and derivatives	Nucleotide metabolism	Purine metabolism	map00230 Purine metabolism; map00232 Caffeine metabolism; map01065 Biosynthesis of alkaloids derived from histidine and purine; map01100 Metabolic pathways; map01110 Biosynthesis of secondary metabolites; map02010 ABC transporters	Up	2.73228e+07	1.30292e+07	2.50122e+07	1.87752e+07	1.55296e+07	3.90998e+08	1.92321e+07	1.21311e+07	1.12525e+07	2.73163e+07	1.49818e+07	9.07194e+07	9.64318e+07	9.09406e+07	4.84564e+07	2.90512e+07	5.949e+07	3.94819e+07	113937776	3.99284e+07	8.17655e+07	4.75658e+07	1.04061e+08	8.14152e+07	2.58118	0.008287	0.111211	1.33085
2.564_143.04066	LL200+HS:L200	POS	2.564	143.041	C6 H9 N O S	4-Methyl-5-thiazoleethanol	NA	0.000171028	1.19566	level3	mzCloud	C04294	HMDB0032985	Organoheterocyclic compounds	Thiazoles	Azoles	Organoheterocyclic compounds	Metabolism of cofactors and vitamins	Thiamine metabolism	map00730 Thiamine metabolism; map01100 Metabolic pathways	Up	4.73959e+06	1.73842e+06	2.23412e+06	2.5092e+06	501139	588376	1.85739e+06	1.74955e+06	326192	803266	692892	5.00024e+06	6.48315e+06	4.34086e+06	6.2576e+06	3.19797e+06	1.21481e+06	598822	1.47493e+06	9.45578e+06	1.80246e+06	6.70297e+06	4.00984e+06	5.64653e+06	4.25705	0.00597083	0.103893	1.65475
2.66_110.07383	LL200+HS:L200	POS	2.66	110.074	C7 H10 O	trans,trans-2,4-Heptadienal	NA	0.00066247	6.01845	level3	mzCloud	NA	NA	NA	NA	NA	NA	NA	NA	NA	Up	1.27894e+07	2.40354e+07	2.73069e+07	2.18817e+07	2.24973e+07	5.21617e+07	1.73823e+07	2.06034e+07	9.73447e+06	2.62726e+07	2.23083e+07	74001301	7.66697e+07	7.49233e+07	6.89506e+07	5.96437e+07	6.09411e+07	5.39968e+07	9.35305e+07	6.07497e+07	8.31234e+07	7.23867e+07	8.06806e+07	8.35083e+07	2.03515	0.0300119	0.156593	1.21475
3.11_188.11629	LL200+HS:L200	POS	3.11	188.116	C8 H16 N2 O3	N2-Acetyl-L-lysine	NA	0.000198489	1.05514	level3	BMDB	C12989	HMDB0000446	Organic acids and derivatives	Amino acids, peptides, and analogues	Carboxylic acids and derivatives	Amino acids, peptides, and analogues	NA	NA	NA	Down	1.09993e+08	2.11975e+08	3.15631e+08	2.55389e+08	1.59042e+08	2.55102e+08	2.23637e+08	1.42279e+08	1.9045e+08	4.33151e+08	3.16598e+08	2.97949e+07	2.92065e+07	2.91056e+07	4.87312e+07	44941305	4.63289e+07	1.01766e+08	1.58414e+07	3.11434e+07	1.95959e+07	2.51027e+07	3.77901e+07	1.73493e+07	0.129561	0.00533758	0.100648	1.78925
3.534_280.10591	LL200+HS:L200	POS	3.534	280.106	C13 H16 N2 O5	α-Aspartylphenylalanine	NA	-8.66e-06	-0.0309044	level3	mzCloud	NA	HMDB0000706	Organic acids and derivatives	Amino acids, peptides, and analogues	Carboxylic acids and derivatives	Amino acids, peptides, and analogues	NA	NA	NA	Down	3.85836e+06	5.38601e+06	7.98174e+06	7.34928e+06	7.47342e+06	4.66566e+06	9.1678e+06	9.29972e+06	6.97144e+06	1.76836e+07	1.16142e+07	5.522e+06	9.24801e+06	5.09808e+06	4.84318e+06	2.34547e+06	4.60991e+06	6.40843e+06	1.68891e+06	3.45203e+06	3.20395e+06	3.85522e+06	5.54421e+06	1.54097e+06	0.388557	0.0396123	0.167974	1.07578
3.59_785.16117	LL200+HS:L200	NEG	3.59	785.161	C27 H33 N9 O15 P2	Flavin adenine dinucleotide (FAD)	NA	0.00403628	5.14073	level3	mzCloud	C00016	HMDB0001248	Nucleosides, nucleotides, and analogues	NA	Flavin nucleotides	Nucleic acids and analogues	Metabolism of cofactors and vitamins	Riboflavin metabolism	map00740 Riboflavin metabolism; map01100 Metabolic pathways; map01110 Biosynthesis of secondary metabolites; map04977 Vitamin digestion and absorption	Up	1.57058e+06	1.87734e+06	2.19466e+06	1.15502e+06	1.0833e+06	838058	794566	1.23103e+06	577318	1.53336e+06	1.38212e+06	7.24914e+06	6.86674e+06	9.46022e+06	1.1239e+07	7.23779e+06	6.12965e+06	5.13196e+06	1.12637e+07	7.55378e+06	9.0647e+06	7.21742e+06	8.64118e+06	8.37218e+06	2.36961	0.0326757	0.160296	1.40541
4.082_456.10485	LL200+HS:L200	POS	4.082	456.105	C17 H21 N4 O9 P	Flavin mononucleotide (FMN)	NA	0.000239081	0.524179	level3	mzCloud	C00061	HMDB0001520	Nucleosides, nucleotides, and analogues	NA	Flavin nucleotides	Nucleic acids and analogues	Energy metabolism	Oxidative phosphorylation	map00190 Oxidative phosphorylation; map00740 Riboflavin metabolism; map00997 Biosynthesis of various secondary metabolites - part 3; map01057 Biosynthesis of type II polyketide products; map01100 Metabolic pathways; map01110 Biosynthesis of secondary metabolites; map04977 Vitamin digestion and absorption	Up	1.20437e+06	2.42198e+06	2.3389e+06	959816	1.65922e+06	720724	1.06928e+06	1.33485e+06	726255	2.17791e+06	1.90854e+06	3.89862e+06	4.60668e+06	4.68534e+06	4.25932e+06	4.44721e+06	3.81856e+06	3.05827e+06	4.97317e+06	5.51745e+06	4.70606e+06	5.26636e+06	4.08959e+06	4.37551e+06	1.79269	0.0415032	0.17171	1.09151
4.202_244.08829	LL200+HS:L200	POS	4.202	244.088	C10 H16 N2 O3 S	Biotin	NA	0.000125882	0.515723	level3	BMDB	C00120	HMDB0000030	Organoheterocyclic compounds	NA	Biotin and derivatives	Organoheterocyclic compounds	Metabolism of cofactors and vitamins	Biotin metabolism	map00780 Biotin metabolism; map01100 Metabolic pathways; map02010 ABC transporters; map04977 Vitamin digestion and absorption	Down	970768	1.22702e+06	1.23257e+06	1.1652e+06	805569	866240	842924	933639	1.02836e+06	2.67896e+06	1.29219e+06	513418	552938	527353	623474	820973	589934	947919	489591	683857	417623	541606	465766	386444	0.405647	0.0106306	0.119808	1.14484
4.441_278.08785	LL200+HS:L200	POS	4.441	278.088	C12 H14 N4 O2 S	Sulfamethazine	NA	0.00410025	14.7447	level3	mzCloud	C19530	HMDB0015522	Benzenoids	Benzenesulfonamides	Benzene and substituted derivatives	Benzene and derivatives	NA	NA	NA	Down	19258.1	20022	18071.8	15337.2	12883.8	26719.4	16411.8	17398.1	763755	2.50378e+06	1.42788e+06	24164.9	24051.2	26964.6	24809.4	4.45051e+06	2.96129e+06	2.68368e+06	32986.6	26696.4	30401.1	24850.2	27794.9	26928.4	0.0114704	8.92e-06	0.00120954	3.1344
4.535_296.17304	LL200+HS:L200	POS	4.535	296.173	C20 H24 O2	17α-Ethynylestradiol	NA	-0.00458587	-15.4835	level3	mzCloud	C07534	HMDB0001926	Lipids and lipid-like molecules	Estrane steroids	Steroids and steroid derivatives	Steroids and derivatives	NA	NA	NA	Down	1.79274e+06	9.34024e+06	1.47757e+07	9.69681e+06	4.90882e+06	685947	1.15885e+07	8.04332e+06	5.11571e+06	7.86326e+06	1.41931e+07	22800.6	134705	24369.7	173254	185553	247417	213293	29081.8	71351.9	26800	35631.2	47637.1	24062	0.00843199	0.00673267	0.106084	2.58963
4.562_344.19460	LL200+HS:L200	POS	4.562	344.195	C21 H28 O4	Nor-9-carboxy-δ9-THC	NA	-0.00415653	-12.076	level3	mzCloud	NA	NA	NA	NA	NA	NA	NA	NA	NA	Down	35131.1	941954	143229	429149	1.24944e+06	26668.7	646628	576248	5.75729e+06	3.37434e+06	2.23011e+06	43625.6	22983.5	52061.3	20409.1	44915.5	193237	396571	86211.4	20788.6	55122.4	22657.5	25244.7	23027.1	0.0194267	0.00868809	0.111935	2.37757
4.571_156.05363	LL200+HS:L200	POS	4.571	156.054	C6 H8 N2 O3	Imidazolelactic acid	NA	0.000133022	0.852414	level3	mzCloud	NA	HMDB0002320	Organoheterocyclic compounds	Imidazoles	Azoles	Imidazoles	NA	NA	NA	Down	167354	43880	106318	39321	89914.2	152441	35689	26617	3.78174e+07	5.48378e+07	6.66356e+07	238249	33588.5	279592	45682.4	116902210	8.81237e+07	8.19795e+07	320566	85734.8	231380	233867	122474	53799.7	0.00234782	6.12e-08	3.07e-05	3.75997
5.083_322.05122	LL200+HS:L200	NEG	5.083	322.051	C10 H15 N2 O8 P	Thymidine 5'-monophosphate	NA	-0.00538273	-16.7136	level3	mzCloud	C00364	HMDB0001227	Nucleosides, nucleotides, and analogues	Pyrimidine deoxyribonucleotides	Pyrimidine nucleotides	Nucleic acids and analogues	Nucleotide metabolism	Pyrimidine metabolism	map00240 Pyrimidine metabolism; map01100 Metabolic pathways; map01523 Antifolate resistance	Down	1.13997e+07	3.01285e+06	3.02376e+06	4.25562e+06	4.9787e+06	2.38799e+07	2.75828e+06	3.56444e+06	5.00847e+06	1.3577e+07	1.1131e+07	1.05307e+07	1.21062e+07	2.53202e+07	7.01443e+06	9.35426e+06	5.22201e+06	6.25558e+06	3.85279e+06	3.79062e+06	2.62502e+06	5.2556e+06	3.6013e+06	5.06437e+06	0.478547	0.00817108	0.110707	1.0474
5.421_222.08914	LL200+HS:L200	NEG	5.421	222.089	C12 H14 O4	Monobutyl phthalate	NA	-6.89e-05	-0.310259	level3	mzCloud	NA	HMDB0013247	Benzenoids	Benzoic acids and derivatives	Benzene and substituted derivatives	Benzene and derivatives	NA	NA	NA	Up	217234	159352	2.57049e+06	121844	254447	241656	193172	551663	112211	162381	161751	284388	287080	272398	238533	223346	237918	223098	298426	245756	484596	495628	247390	270060	1.82194	0.00819692	0.110707	1.02982
6.6_258.08925	LL200+HS:L200	POS	6.6	258.089	C15 H14 O4	Yangonin	NA	4.15e-05	0.160918	level3	mzCloud	C09980	HMDB0034144	Phenylpropanoids and polyketides	NA	Kavalactones	Polyketides[PK]	Chemical structure transformation maps	Biosynthesis of phenylpropanoids	map01061 Biosynthesis of phenylpropanoids	Up	741569	482649	527179	889878	666197	3.64952e+06	700926	508930	303211	724537	372479	360008	500530	1.317e+06	660532	382925	122390	218005	516813	545833	387788	769225	722378	709346	1.71947	0.0437986	0.174562	1.00326
6.802_250.11817	LL200+HS:L200	POS	6.802	250.118	C14 H18 O4	Coenzyme Q1	NA	-0.00233925	-9.35248	level3	mzCloud	NA	HMDB0002012	Lipids and lipid-like molecules	Quinone and hydroquinone lipids	Prenol lipids	Quinone	NA	NA	NA	Up	5.68547e+06	4.65189e+06	5.97912e+06	6.32564e+06	1.19342e+06	858578	8.73852e+06	6.74567e+06	1.04607e+06	2.2458e+06	1.66903e+06	3.15907e+06	3.26671e+06	2.11733e+06	1.21198e+06	1.69248e+06	433334	431587	4.10686e+06	8.09019e+06	2.78337e+06	5.33997e+06	894198	1.48937e+06	3.01983	0.0414728	0.171655	1.26875
7.414_354.24076	LL200+HS:L200	NEG	7.414	354.241	C20 H34 O5	Prostaglandin E1	NA	0.00013181	0.372091	level3	mzCloud	C04741	HMDB0001442	Lipids and lipid-like molecules	Eicosanoids	Fatty Acyls	Fatty acyls[FA]	NA	NA	NA	Down	1.32647e+06	1.60021e+06	1.64938e+06	6.27964e+06	5.0259e+06	396586	1.03362e+07	2.7917e+07	4.91433e+06	937226	1.71079e+06	182484	445370	177949	498816	376847	845599	684476	191901	740376	474126	466135	411845	378128	0.281174	0.044224	0.175364	1.22159
7.572_122.07324	LL200+HS:L200	POS	7.572	122.073	C8 H10 O	1-Phenylethanol	NA	7.5e-05	0.614597	level3	BMDB	C07112	HMDB0032619	Benzenoids	NA	Benzene and substituted derivatives	Benzene and derivatives	NA	NA	NA	Up	1.53701e+07	4.04016e+06	1.25877e+07	1.03702e+07	4.13102e+06	9.88016e+06	8.48225e+06	2.76275e+07	3.97577e+06	4.42588e+06	4.73668e+06	5.74249e+06	5.02804e+06	5.52541e+06	3.58222e+06	1.02782e+07	9.89937e+06	8.80157e+06	1.49125e+07	1.37134e+07	1.36001e+07	1.00604e+07	1.08448e+07	1.1932e+07	1.78223	0.0137956	0.127937	1.05705
7.649_354.24077	LL200+HS:L200	NEG	7.649	354.241	C20 H34 O5	8-iso Prostaglandin F2β	NA	0.000146992	0.414949	level3	mzCloud	NA	NA	NA	NA	NA	NA	NA	NA	NA	Down	766011	729958	1.28266e+06	3.48415e+06	2.94311e+06	158042	8.85154e+06	2.06548e+07	2.81182e+06	1.97898e+06	1.6763e+06	624577	550994	821991	667240	575642	1.14675e+06	360822	103867	598482	525251	501407	539322	402736	0.312394	0.0287037	0.156491	1.2561
7.958_314.24560	LL200+HS:L200	NEG	7.958	314.246	C18 H34 O4	(+/-)9,10-dihydroxy-12Z-octadecenoic acid	NA	-0.000105926	-0.337081	level3	mzCloud	NA	NA	NA	NA	NA	NA	NA	NA	NA	Down	6.37538e+06	7.6276e+06	8.22323e+06	1.48282e+07	2.34089e+07	5.56925e+06	1.15279e+07	2.83564e+07	1.26806e+07	1.54872e+07	8.12053e+06	9.77989e+06	1.00959e+07	8.58358e+06	1.17652e+07	1.02519e+07	9.50126e+06	8.5917e+06	6.9154e+06	7.94629e+06	4.33569e+06	5.02146e+06	5.51325e+06	4.52917e+06	0.530088	0.00113718	0.0459257	1.1002
8.157_362.24596	LL200+HS:L200	NEG	8.157	362.246	C22 H34 O4	(+/-)7(8)-DiHDPA	NA	0.00025536	0.704935	level3	mzCloud	NA	NA	NA	NA	NA	NA	NA	NA	NA	Down	4.28612e+06	2.36657e+06	2.53356e+06	8.35163e+06	8.83979e+06	1.24441e+06	6.31726e+06	2.08737e+07	6.2266e+06	1.51251e+07	6.31952e+06	1.81941e+06	3.84345e+06	2.78551e+06	3.84113e+06	5.24795e+06	4.65217e+06	2.86949e+06	1.85956e+06	3.48304e+06	3.126e+06	2.18065e+06	1.61769e+06	1.91743e+06	0.350744	0.00590699	0.103893	1.25775
8.275_314.24623	LL200+HS:L200	POS	8.275	314.246	C18 H34 O4	(+/-)12(13)-DiHOME	NA	0.000521367	1.65911	level3	mzCloud	C14829	HMDB0004705	Lipids and lipid-like molecules	Fatty acids and conjugates	Fatty Acyls	Fatty acyls[FA]	Lipid metabolism	Linoleic acid metabolism	map00591 Linoleic acid metabolism	Down	1.36381e+06	1.426e+06	2.03503e+06	3.34847e+06	4.40511e+06	912548	4.22752e+06	7.61672e+06	3.76273e+06	1.57288e+06	2.43522e+06	1.12037e+06	1.01318e+06	1.27712e+06	1.39305e+06	1.30097e+06	1.90166e+06	1.06621e+06	751133	1.27505e+06	880540	863267	710175	851567	0.442847	0.00828791	0.111211	1.16819
8.402_272.23503	LL200+HS:L200	NEG	8.402	272.235	C16 H32 O3	16-Hydroxyhexadecanoic acid	NA	-0.00011252	-0.413319	level3	mzCloud	C18218	HMDB0006294	Lipids and lipid-like molecules	Fatty acids and conjugates	Fatty Acyls	Fatty acyls[FA]	Lipid metabolism	Cutin, suberine and wax biosynthesis	map00073 Cutin, suberine and wax biosynthesis; map01100 Metabolic pathways	Up	3.52421e+07	2.04735e+07	1.73552e+07	4.46067e+06	5.18594e+06	9.7496e+06	1.1629e+06	6.97855e+06	3.76104e+06	2.13136e+06	4.93579e+06	5.41009e+06	6.84234e+06	4.03216e+06	4.5051e+06	1.13593e+07	2.98919e+06	6.31123e+06	2.60602e+07	1.55748e+07	2.18761e+07	1.14605e+07	7.32413e+06	9.47959e+06	2.91462	0.0052991	0.100543	1.40616
8.569_336.23028	LL200+HS:L200	NEG	8.569	336.23	C20 H30 O3	(+/-)18-HEPE	NA	18.0108	56598.6	level3	mzCloud	NA	NA	NA	NA	NA	NA	NA	NA	NA	Down	5.2926e+06	5.98924e+06	8.03872e+06	9.71781e+06	1.01625e+07	935844	8.42736e+06	1.88366e+07	8.71462e+06	2.80154e+06	6.33866e+06	1.32669e+06	1.18435e+06	1.33839e+06	1.24154e+06	1.38185e+06	1.46741e+06	1.85405e+06	491314	1.90364e+06	476808	782776	890732	828139	0.238203	0.00850975	0.111921	1.51744
8.653_320.23527	LL200+HS:L200	NEG	8.653	320.235	C20 H32 O3	11,12-Epoxy-(5Z,8Z,11Z)-icosatrienoic acid	NA	0.00012358	0.385905	level3	mzCloud	C14770	NA	FA Fatty acyls	FA0305 Hydroxy/hydroperoxyeicosatrienoic acids	FA03 Eicosanoids	Fatty acyls[FA]	Lipid metabolism	Arachidonic acid metabolism	map00590 Arachidonic acid metabolism; map01100 Metabolic pathways; map04270 Vascular smooth muscle contraction; map04726 Serotonergic synapse; map04913 Ovarian steroidogenesis	Down	1.52486e+07	2.12478e+07	2.77423e+07	9.30293e+07	6.14546e+07	6.02937e+06	1.01213e+08	191624877	8.10133e+07	3.55884e+07	2.3442e+07	7.83033e+06	1.06082e+07	8.78234e+06	8.59797e+06	8.69633e+06	1.12163e+07	1.28213e+07	7.48199e+06	1.07184e+07	8.51753e+06	6.77617e+06	6.4376e+06	6.53137e+06	0.268919	0.0308843	0.15789	1.2855
8.836_399.33445	LL200+HS:L200	POS	8.836	399.334	C23 H45 N O4	PALMITOYLCARNITINE	NA	-0.000411393	-1.0302	level3	BMDB	C02990	HMDB0000846	NA	NA	NA	NA	Lipid metabolism	Fatty acid degradation	map00071 Fatty acid degradation; map01212 Fatty acid metabolism	Up	9.99139e+06	4.09139e+06	3.45434e+06	2.04092e+06	2.70803e+06	4.84302e+07	1.57055e+06	7.74624e+06	5.36316e+06	2.43902e+06	9.51791e+06	2.51811e+07	3.11178e+07	3.28825e+07	2.37248e+07	3.16114e+07	2.32859e+07	1.63979e+07	6.95085e+07	5.79546e+07	3.16687e+07	3.23806e+07	2.27169e+07	5.16815e+07	3.00074	0.0169293	0.134112	1.47518
9.003_330.21720	LL200+HS:L200	POS	9.003	330.217	C21 H30 O3	17α-Hydroxyprogesterone	NA	-0.00229705	-6.95614	level3	mzCloud	C01176	HMDB0000374	Lipids and lipid-like molecules	Pregnane steroids	Steroids and steroid derivatives	Steroids and derivatives	Lipid metabolism	Steroid hormone biosynthesis	map00140 Steroid hormone biosynthesis; map01100 Metabolic pathways; map04913 Ovarian steroidogenesis; map04927 Cortisol synthesis and secretion; map04934 Cushing syndrome	Down	63956.3	654592	671661	911707	4.80766e+06	198829	1.85139e+06	3.26601e+06	5.65536e+06	519333	2.06468e+06	512832	273856	280628	342815	602695	256269	273124	72801.9	69829.2	68427.7	157976	272315	211972	0.0910554	0.0109242	0.120248	1.85
9.155_322.25068	LL200+HS:L200	POS	9.155	322.251	C20 H32 O2	Arachidonic acid	NA	18.0105	59198.1	level3	mzCloud	C00219	HMDB0001043	Lipids and lipid-like molecules	Fatty acids and conjugates	Fatty Acyls	Fatty acyls[FA]	Lipid metabolism	Arachidonic acid metabolism	map00590 Arachidonic acid metabolism; map00591 Linoleic acid metabolism; map01040 Biosynthesis of unsaturated fatty acids; map01100 Metabolic pathways; map04216 Ferroptosis; map04217 Necroptosis; map04270 Vascular smooth muscle contraction; map04611 Platelet activation; map04664 Fc epsilon RI signaling pathway; map04666 Fc gamma R-mediated phagocytosis; map04723 Retrograde endocannabinoid signali…	Down	2.78819e+06	2.38177e+06	3.29608e+06	6.29983e+06	4.00695e+06	564877	8.61555e+06	1.19032e+07	9.28471e+06	1.65212e+06	2.5938e+06	1.71017e+06	1.34158e+06	549509	1.82023e+06	551895	481433	1.95144e+06	149940	597830	569337	572943	509208	706780	0.188069	0.0375871	0.166006	1.39908
9.376_453.28584	LL200+HS:L200	POS	9.376	453.286	C21 H44 N O7 P	Glycerophospho-N-palmitoyl ethanolamine	NA	0.000299932	0.661685	level3	mzCloud	NA	NA	NA	NA	NA	NA	NA	NA	NA	Up	1.40809e+08	3.23135e+07	5.12648e+07	3.30048e+07	2.5767e+07	6.67778e+07	2.30422e+07	3.16624e+07	4.07904e+07	4.80729e+07	4.50959e+07	9.26233e+07	1.35877e+08	8.11686e+07	1.20338e+08	8.52243e+07	8.69164e+07	9.87674e+07	7.2017e+07	1.21465e+08	1.25857e+08	1.55302e+08	1.2748e+08	1.22098e+08	1.78878	0.0108709	0.120248	1.02621
9.592_268.24020	LL200+HS:L200	NEG	9.592	268.24	C17 H32 O2	trans-10-Heptadecenoic acid	NA	-3.45e-05	-0.128784	level3	mzCloud	NA	NA	NA	NA	NA	NA	NA	NA	NA	Down	1.70756e+07	1.1109e+07	9.1965e+06	9.33454e+06	1.95638e+07	3.36072e+07	9.03642e+06	2.21517e+07	3.8306e+07	9.49464e+06	3.74699e+07	2.6762e+07	3.33176e+07	1.81907e+07	2.46515e+07	2.51017e+07	5.43602e+07	4.5542e+07	9.47257e+06	9.51933e+06	9.10074e+06	1.35157e+07	2.15538e+07	1.89983e+07	0.39073	0.0194115	0.138259	1.23564
9.894_327.31350	LL200+HS:L200	POS	9.894	327.313	C20 H41 N O2	N,N-Dimethylsphingosine	NA	-0.000227183	-0.694083	level3	mzCloud	C13914	HMDB0013645	Organic nitrogen compounds	Amines	Organonitrogen compounds	Amines	NA	NA	NA	Up	1.6657e+07	5.42241e+06	6.71142e+06	2.71675e+06	2.00761e+06	1.45109e+07	909843	2.3468e+06	3.27156e+06	4.8975e+06	4.522e+06	1.30836e+07	1.43331e+07	1.44225e+07	2.58256e+07	1.6471e+07	1.01132e+07	1.29424e+07	1.58539e+07	1.68542e+07	2.66e+07	1.45869e+07	2.23062e+07	1.44882e+07	2.11977	0.0183721	0.136225	1.22615
9.897_300.20388	LL200+HS:L200	POS	9.897	300.204	C20 H28 O2	Isotretinoin	NA	-0.00504527	-16.8059	level3	mzCloud	C07058	HMDB0006219	Lipids and lipid-like molecules	Retinoids	Prenol lipids	Prenol lipids[PR]	NA	NA	NA	Up	7.40237e+06	7.06468e+06	9.64193e+06	3.97104e+06	3.37268e+06	1.11487e+07	2.74215e+06	1.1814e+06	2.51904e+06	8.33133e+06	7.7342e+06	1.20717e+07	1.18683e+07	1.61781e+07	2.99585e+07	1.24088e+07	9.41856e+06	1.05757e+07	2.4394e+07	1.36263e+07	2.58148e+07	14828850	1.79944e+07	1.49482e+07	2.1889	0.0122906	0.124887	1.24794
0.565_243.12185	LL200+HS:L200	POS	0.565	243.122	C10 H17 N3 O4	L-Glutaminyl-L-proline	-5.4e-05	-0.222126	NA	level4	ChemSpider	NA	NA	NA	NA	NA	NA	NA	NA	NA	Up	198380	413365	265642	352713	338856	1.30144e+06	346265	206507	239976	621316	647373	537709	814167	562322	1.47276e+06	545702	1.15629e+06	1.07519e+06	2.08754e+06	974112	3.24711e+06	1.74426e+06	1.91989e+06	834696	2.5217	0.0128433	0.125681	1.2636
0.572_189.11133	LL200+HS:L200	POS	0.572	189.111	C7 H15 N3 O3	Homocitrulline	-8.05e-06	-0.0425436	NA	level4	ChemSpider	NA	NA	NA	NA	NA	NA	NA	NA	NA	Down	506886	1.18524e+06	1.39581e+06	1.36743e+06	799761	537699	1.48429e+06	875641	983047	2.27413e+06	1.78332e+06	226010	168201	267307	339766	346403	308640	374948	264057	192288	254339	202121	194776	163713	0.209422	0.0166681	0.133222	1.43988
0.575_203.12671	LL200+HS:L200	POS	0.575	203.127	C8 H17 N3 O3	Gly-Lys	-0.000286186	-1.4089	NA	level4	ChemSpider	NA	NA	NA	NA	NA	NA	NA	NA	NA	Down	2.94661e+06	8.02063e+06	1.35739e+07	1.37089e+07	8.82725e+06	8.32064e+06	1.19419e+07	7.82733e+06	1.11972e+07	2.24494e+07	1.57983e+07	723008	1.71919e+06	732376	2.92486e+06	1.6584e+06	2.73432e+06	4.56369e+06	384686	909321	1.13389e+06	1.315e+06	2.55674e+06	1.12554e+06	0.127141	0.00586971	0.103893	1.79104
0.577_274.16396	LL200+HS:L200	POS	0.577	274.164	C11 H22 N4 O4	gln-lys	-0.000147559	-0.538215	NA	level4	ChemSpider	NA	NA	NA	NA	NA	NA	NA	NA	NA	Down	309234	926808	1.36535e+06	1.2631e+06	956555	355576	1.71589e+06	1.05339e+06	1.04202e+06	2.03016e+06	1.90987e+06	170576	198241	211774	237482	202950	298176	490156	119512	153840	118643	109459	301719	116958	0.15404	0.00814636	0.110707	1.6868
0.586_261.13191	LL200+HS:L200	POS	0.586	261.132	C10 H19 N3 O5	Asp-lys	-0.000556526	-2.1312	NA	level4	ChemSpider	NA	NA	NA	NA	NA	NA	NA	NA	NA	Down	787054	1.18304e+06	1.59687e+06	1.92404e+06	1.73582e+06	1.72262e+06	1.92604e+06	1.63157e+06	1.4998e+06	3.42204e+06	1.44455e+06	861733	1.08554e+06	626488	965214	616800	1.02802e+06	1.48589e+06	548782	465815	792144	591999	1.15972e+06	666075	0.444823	0.0259857	0.151135	1.04042
0.588_167.98230	LL200+HS:L200	NEG	0.588	167.982	C3 H5 O6 P	Phosphoenolpyruvic acid	-7.63e-05	-0.453962	NA	level4	ChemSpider	NA	NA	NA	NA	NA	NA	NA	NA	NA	Up	73128.8	59387.5	114210	68639.8	67525.4	123726	62100.9	78343.2	72872	80603.2	76924.2	3.09693e+06	4.51346e+06	7.38521e+06	3.07039e+06	5.66203e+06	1.95041e+06	1.29137e+06	1.90146e+07	8.92057e+06	6.2393e+06	5.19225e+06	2.69736e+06	5.34522e+06	5.1903	0.0173185	0.134858	2.14245
0.594_370.07463	LL200+HS:L200	NEG	0.594	370.075	C12 H18 O13	Digalacturonic acid	-0.000111415	-0.301061	NA	level4	ChemSpider	NA	NA	NA	NA	NA	NA	NA	NA	NA	Down	95372.3	525847	376262	57523.5	704661	103688	105920	856105	131815	283888	1.17676e+06	100889	58904.6	112227	124036	609927	1.72096e+06	154170	131912	107077	113484	100453	105232	112126	0.164385	0.0251241	0.150095	1.46962
0.597_574.16552	LL200+HS:L200	POS	0.597	574.166	C35 H26 O8	3'-(3,5-Dihydroxyphenyl)-6'-hydroxy-2,2'-bis(4-hydroxyphenyl)-2,2',3,3'-tetrahydro-3,4'-bi-1-benzofuran-5-carbaldehyde	0.00275212	4.79328	NA	level4	ChemSpider	NA	NA	NA	NA	NA	NA	NA	NA	NA	Down	1.74726e+06	1.90853e+06	2.16413e+06	1.80385e+06	893844	999203	1.7456e+06	871977	1.5577e+06	3.51694e+06	1.9321e+06	90507.5	90776.3	85229.4	530194	224820	267604	462773	287949	89516.6	355448	88123.3	412017	115366	0.169358	0.0255158	0.150826	1.50126
0.598_97.96750	LL200+HS:L200	NEG	0.598	97.9675	H2 O4 S	Sulfuric acid	0.000125793	1.28403	NA	level4	ChemSpider	NA	NA	NA	NA	NA	NA	NA	NA	NA	Up	1.22746e+07	1.09431e+07	1.0623e+07	6.14595e+06	3.43729e+06	1.52751e+07	5.20179e+06	5.6439e+06	4.29736e+06	6.53895e+06	7.76386e+06	1.14167e+07	1.54351e+07	1.5954e+07	1.41395e+07	1.42063e+07	1.43997e+07	1.60833e+07	2.11093e+07	1.68128e+07	1.75287e+07	1.85423e+07	1.55026e+07	1.77106e+07	1.69391	0.0331386	0.16135	1.00986
0.61_301.05625	LL200+HS:L200	NEG	0.61	301.056	C8 H16 N O9 P	N-Acetylglucosamine 1-phosphate	-2.2e-05	-0.0730401	NA	level4	ChemSpider	NA	NA	NA	NA	NA	NA	NA	NA	NA	Up	2.23772e+06	1.32598e+06	1.5463e+06	1.23608e+06	1.38952e+06	7.31293e+06	987306	990405	462994	1.28333e+06	948621	1.1701e+07	1.29346e+07	1.25684e+07	1.20401e+07	8.62668e+06	9.63354e+06	9.16697e+06	1.53235e+07	1.0834e+07	1.26989e+07	1.18617e+07	1.20043e+07	1.11559e+07	2.45262	0.0429021	0.173744	1.52158
0.611_225.94405	LL200+HS:L200	POS	0.611	225.944	C6 H4 Cl2 O5	(2E)-2,5-Dichloro-4-oxo-2-hexenedioic acid	0.000474065	2.09816	NA	level4	ChemSpider	NA	NA	NA	NA	NA	NA	NA	NA	NA	Up	480838	527350	603188	560663	830362	1.97464e+06	357441	755538	296191	145200	525683	9.64129e+06	1.80447e+07	9.60987e+06	749012	2.56741e+06	1.47748e+06	1.17428e+06	2.45804e+06	2.14888e+06	3.45205e+06	4.69701e+06	734563	2.58916e+06	2.59926	0.0419467	0.172351	1.33876
0.613_301.04671	LL200+HS:L200	NEG	0.613	301.047	C8 H15 N O9 S	N-Acetylgalactosamine 6-sulfate	-4.62e-05	-0.153495	NA	level4	ChemSpider	NA	NA	NA	NA	NA	NA	NA	NA	NA	Up	544760	849752	350309	199029	151526	804466	260504	209494	157218	93597.3	112842	452471	386365	372955	101405	119586	107128	995783	1.20231e+06	829817	381714	404768	367461	315584	2.20764	0.0291653	0.156593	1.26445
0.616_280.03397	LL200+HS:L200	NEG	0.616	280.034	C12 H12 N2 O2 S2	1-Methoxy-2'-(methylsulfanyl)-4'H-spiro[indole-3,5'-[1,3]thiazol]-2(1H)-one	-5.16e-05	-0.184316	NA	level4	ChemSpider	NA	NA	NA	NA	NA	NA	NA	NA	NA	Up	3.55734e+06	5.55054e+06	751833	2.28205e+06	2.53718e+06	5.69734e+06	3.27793e+06	2.55864e+06	2.11961e+06	4.7302e+06	3.56405e+06	6.14032e+06	6.70937e+06	5.89178e+06	6.92533e+06	9.43351e+06	8.9156e+06	7.4124e+06	1.19057e+07	8.82169e+06	1.2726e+07	8.85369e+06	1.25768e+07	1.24131e+07	1.8603	0.0264844	0.152383	1.1054
0.616_354.05943	LL200+HS:L200	POS	0.616	354.059	C9 H15 N4 O9 P	5-amino-6-(5-phospho-beta-D-ribosylamino)uracil	0.00177045	5.00044	NA	level4	ChemSpider	NA	NA	NA	NA	NA	NA	NA	NA	NA	Up	1.04499e+06	1.19646e+06	1.25308e+06	1.12687e+06	880312	2.23904e+06	982545	1.15134e+06	858189	1.64656e+06	1.01981e+06	1.00298e+06	529820	579759	2.21175e+06	1.23699e+06	1.21817e+06	1.25638e+06	1.62625e+06	2.40703e+06	2.68147e+06	1.60333e+06	2.39804e+06	1.81531e+06	1.73179	0.00160832	0.0566412	1.04136
0.621_115.02693	LL200+HS:L200	NEG	0.621	115.027	C4 H5 N O3	Maleamic acid	-8.37e-06	-0.0728005	NA	level4	ChemSpider	NA	NA	NA	NA	NA	NA	NA	NA	NA	Down	5.85339e+06	6.91275e+06	9.39199e+06	8.48497e+06	5.67657e+06	5.56285e+06	4.96905e+06	3.95239e+06	8.67532e+06	14181380	8.86508e+06	2.91459e+06	2.41861e+06	3.00792e+06	3.39172e+06	4.25972e+06	3.20529e+06	5.87136e+06	3.94914e+06	2.63018e+06	2.82946e+06	2.87492e+06	2.99426e+06	3.35235e+06	0.413473	0.0162469	0.13247	1.13431
0.631_130.07423	LL200+HS:L200	NEG	0.631	130.074	C5 H10 N2 O2	(2S)-2-Piperazinecarboxylic acid	5.6e-06	0.0430779	NA	level4	ChemSpider	NA	NA	NA	NA	NA	NA	NA	NA	NA	Down	2.28776e+06	4.11907e+06	6.61152e+06	6.87702e+06	5.11177e+06	4.03206e+06	5.8697e+06	4.09635e+06	6.51246e+06	1.10672e+07	7.45609e+06	889202	1.98436e+06	2.56448e+06	3.30897e+06	1.39172e+06	3.59555e+06	5.737e+06	1.71652e+06	1.49013e+06	803514	1.61908e+06	3.32252e+06	1.53432e+06	0.293235	0.0108639	0.120248	1.39671
0.637_169.05040	LL200+HS:L200	NEG	0.637	169.05	C4 H12 N O4 P	P-DMEA	7.21e-06	0.0426257	NA	level4	ChemSpider	NA	NA	NA	NA	NA	NA	NA	NA	NA	Up	1.00666e+07	1.20342e+07	1.55191e+07	6.78977e+06	7.09851e+06	1.61128e+07	8.57353e+06	5.90496e+06	6.30911e+06	1.30374e+07	9.3402e+06	2.13944e+07	1.96165e+07	2.0427e+07	1.98214e+07	2.3833e+07	2.74375e+07	1.86354e+07	2.95668e+07	2.14635e+07	4.06337e+07	3.16538e+07	3.64521e+07	3.87877e+07	2.01392	0.0161789	0.13247	1.17826
0.637_206.00667	LL200+HS:L200	POS	0.637	206.007	C6 H6 O8	3-Oxalomalic acid	0.000399057	1.93711	NA	level4	ChemSpider	NA	NA	NA	NA	NA	NA	NA	NA	NA	Down	8.15841e+06	7.30299e+06	6.09977e+06	7.28185e+06	6.17984e+06	12541570	5.98764e+06	7.05049e+06	5.64712e+06	8.29621e+06	1.04691e+07	4.87098e+06	1.2576e+07	6.8464e+06	3.20876e+06	2.35042e+06	2.71874e+06	4.93992e+06	1.95523e+06	1.68941e+06	1.5822e+06	6.31531e+06	2.01949e+06	2.37329e+06	0.462935	0.0382862	0.166515	1.01629
0.64_133.05672	LL200+HS:L200	NEG	0.64	133.057	C5 H11 N O S	(1E)-N-Hydroxy-4-(methylsulfanyl)-1-butanimine	0.000584166	4.39037	NA	level4	ChemSpider	NA	NA	NA	NA	NA	NA	NA	NA	NA	Down	291912	759985	2.61067e+06	2.17467e+06	1.17152e+06	2.12959e+06	1.08959e+06	834424	2.67479e+06	5.09735e+06	1.64395e+06	635541	942194	993490	1.97025e+06	1.18588e+06	1.1191e+06	2.15404e+06	876107	509335	150954	402129	1.09678e+06	328557	0.242439	0.00310055	0.0766507	1.65371
0.643_171.95155	LL200+HS:L200	NEG	0.643	171.952	C6 H5 Br O	2-Bromophenol	-0.000825818	-4.8026	NA	level4	ChemSpider	NA	NA	NA	NA	NA	NA	NA	NA	NA	Up	126367	115774	124132	96764	103960	251369	91463.6	77005.6	95551.9	143781	124832	1.14645e+06	1.73729e+06	1.20004e+06	272671	417924	382386	221924	464963	410755	594074	695042	245578	618841	2.18498	0.0159955	0.132186	1.22706
0.643_244.04603	LL200+HS:L200	NEG	0.643	244.046	C8 H12 N4 O S2	MFCD00942304	0.00077385	3.17093	NA	level4	ChemSpider	NA	NA	NA	NA	NA	NA	NA	NA	NA	Down	2.5386e+06	2.62845e+06	2.48209e+06	2.10311e+06	1.43504e+06	1.36939e+06	2.10706e+06	1.64034e+06	1.93287e+06	3.54631e+06	2.2057e+06	581159	234004	650857	1.12228e+06	1.20661e+06	1.2491e+06	1.56928e+06	840581	658131	927218	339169	1.15566e+06	605036	0.386494	0.00278027	0.0732429	1.31215
0.643_298.06779	LL200+HS:L200	NEG	0.643	298.068	C17 H14 O3 S	Zaltoprofen	0.00142807	4.79111	NA	level4	ChemSpider	NA	NA	NA	NA	NA	NA	NA	NA	NA	Down	1.16233e+06	997338	1.17475e+06	1.16859e+06	846143	676616	1.26122e+06	729213	1.19885e+06	1.6099e+06	1.55017e+06	162420	184903	183399	146843	192163	146459	233540	161092	143437	154917	151608	158813	138702	0.184254	0.0442384	0.175364	1.35201
0.645_86.04816	LL200+HS:L200	POS	0.645	86.0482	C3 H6 N2 O	N-NITROSOMETHYLVINYLAMINE	0.000144275	1.67668	NA	level4	ChemSpider	NA	NA	NA	NA	NA	NA	NA	NA	NA	Down	167833	1.367e+06	6.30405e+06	8.57846e+06	5.56889e+06	5.92316e+06	1.70768e+06	2.2199e+06	4.89176e+06	1.14165e+07	2.87539e+06	2.52037e+06	3.65534e+06	4.56398e+06	6.38615e+06	3.80478e+06	5.62371e+06	1.09243e+07	3.98165e+06	2.1798e+06	1.54495e+06	2.49906e+06	4.03288e+06	1.66771e+06	0.402314	0.014486	0.128328	1.17821
0.648_266.02771	LL200+HS:L200	NEG	0.648	266.028	C14 H12 Cl2 O	Chlorfenethol	0.00119107	4.47727	NA	level4	ChemSpider	NA	NA	NA	NA	NA	NA	NA	NA	NA	Down	2.35651e+06	2.13973e+06	1.89727e+06	1.99463e+06	1.63945e+06	2.82834e+06	2.05757e+06	1.79314e+06	1.895e+06	2.29339e+06	2.78737e+06	853211	1.42893e+06	1.01743e+06	603017	372075	434455	1.02736e+06	565069	224325	124571	879584	381297	402003	0.292503	0.0308971	0.15789	1.29511
0.648_282.00182	LL200+HS:L200	NEG	0.648	282.002	C12 H10 O4 S2	(1E)-4-{6-[(Formyloxy)methyl]-1,2-dithiin-3-yl}-1-buten-3-yn-1-yl acetate	-0.000234225	-0.830579	NA	level4	ChemSpider	NA	NA	NA	NA	NA	NA	NA	NA	NA	Down	3.62048e+06	3.37062e+06	3.22056e+06	2.63607e+06	1.73446e+06	3.37656e+06	2.81086e+06	2.38475e+06	2.35544e+06	4.37279e+06	3.92784e+06	698393	1.00665e+06	756189	1.16147e+06	561208	698470	1.72095e+06	968988	497465	362957	1.00186e+06	969549	577225	0.321049	0.0468863	0.17963	1.14669
0.649_248.04092	LL200+HS:L200	NEG	0.649	248.041	C12 H6 F2 N2 O2	fludioxonil	0.00118729	4.78669	NA	level4	ChemSpider	NA	NA	NA	NA	NA	NA	NA	NA	NA	Down	5.2705e+06	5.59686e+06	5.33375e+06	3.37974e+06	2.74789e+06	2.53469e+06	3.20379e+06	2.80062e+06	2.86214e+06	6.28379e+06	5.08183e+06	898356	694674	1.07491e+06	2.43605e+06	2.96174e+06	2.38581e+06	2.09725e+06	1.55149e+06	1.63309e+06	1.9767e+06	1.51034e+06	1.88053e+06	1.06329e+06	0.443669	0.00630648	0.104113	1.12295
0.649_331.07824	LL200+HS:L200	NEG	0.649	331.078	C18 H18 Cl N O S	Zotepine	-0.00151915	-4.58848	NA	level4	ChemSpider	NA	NA	NA	NA	NA	NA	NA	NA	NA	Down	749595	933631	751995	986419	433566	792680	1.05889e+06	476967	1.02902e+06	1.98551e+06	702065	123803	97901.4	322140	265316	134894	162453	483820	172290	92495.9	114044	192510	340260	91008	0.222912	0.0380552	0.166364	1.3336
0.651_257.10301	LL200+HS:L200	POS	0.651	257.103	C8 H20 N O6 P	L-alpha-Glycerylphosphorylcholine	0.000190612	0.741383	NA	level4	ChemSpider	NA	NA	NA	NA	NA	NA	NA	NA	NA	Down	2.69928e+08	6.82875e+08	7.46985e+08	5.21573e+08	5.83024e+08	4.48042e+07	5.9758e+08	4.64141e+08	6.47955e+08	7.55912e+08	9.54252e+08	4.72192e+08	1.66288e+08	1.76062e+08	3.37663e+08	2.5112e+08	332040038	2.62775e+08	3.11916e+08	1.3847e+08	2.08286e+08	1.83957e+08	351640641	1.96627e+08	0.434105	0.0259686	0.151135	1.07401
0.653_257.10224	LL200+HS:L200	POS	0.653	257.102	C10 H15 N3 O5	Benserazide	0.00107176	4.16861	NA	level4	ChemSpider	NA	NA	NA	NA	NA	NA	NA	NA	NA	Down	2.69928e+08	6.82875e+08	8.53578e+08	5.21573e+08	5.83024e+08	44350962	5.9758e+08	4.64141e+08	6.47955e+08	1791633880	9.614e+08	4.72192e+08	1.66288e+08	1.76062e+08	3.36143e+08	2.76277e+08	332040038	2.62775e+08	3.09499e+08	1.3847e+08	2.10148e+08	1.86596e+08	351640641	1.96627e+08	0.326066	0.0348896	0.164322	1.14321
0.656_163.08446	LL200+HS:L200	NEG	0.656	163.084	C6 H13 N O4	Bicine	6.67e-06	0.0409238	NA	level4	ChemSpider	NA	NA	NA	NA	NA	NA	NA	NA	NA	Down	4.86048e+06	1.9665e+07	4.90796e+06	4.4752e+06	1.45102e+07	2.37106e+07	5.19125e+06	1.59945e+07	1.84193e+07	3.46289e+07	2.6043e+07	7.44445e+06	9.0794e+06	9.47526e+06	5.9385e+06	1.19806e+07	1.16836e+07	1.55367e+07	1.39081e+07	5.2942e+06	1.19578e+07	7.45344e+06	8.26983e+06	1.06955e+07	0.486752	0.0135222	0.127678	1.03104
0.656_207.07418	LL200+HS:L200	POS	0.656	207.074	C8 H17 N O S2	Dihydrolipoamide	-0.000972311	-4.69545	NA	level4	ChemSpider	NA	NA	NA	NA	NA	NA	NA	NA	NA	Up	1.18289e+07	1.29215e+07	8.96192e+06	1.10048e+07	1.40398e+07	3.49281e+07	8.42881e+06	1.99825e+07	1.19929e+07	1.60549e+07	2.45195e+07	2.25482e+07	1.7012e+07	2.42225e+07	4.31038e+07	3.20286e+07	3.5405e+07	3.79276e+07	4.6141e+07	5.29241e+07	7.85399e+07	3.62714e+07	5.46412e+07	4.75929e+07	2.0016	0.00913754	0.112674	1.14716
0.658_100.06369	LL200+HS:L200	POS	0.658	100.064	C4 H8 N2 O	NPYR	3.07e-05	0.306798	NA	level4	ChemSpider	NA	NA	NA	NA	NA	NA	NA	NA	NA	Down	1.45725e+07	1.39863e+07	1.55019e+07	1.49954e+07	1.1663e+07	2.00892e+07	1.08258e+07	1.13881e+07	1.68672e+07	2.11406e+07	1.82285e+07	6.55361e+06	1.10908e+07	1.37808e+06	4.51041e+06	4.28811e+06	5.10186e+06	1.15207e+07	7.35422e+06	2.60232e+06	2.96335e+06	8.56556e+06	4.52808e+06	4.40651e+06	0.394313	0.0333528	0.161416	1.11439
0.658_189.06342	LL200+HS:L200	POS	0.658	189.063	C7 H11 N O5	N-Acetyl-L-glutamic acid	-0.000301783	-1.5962	NA	level4	ChemSpider	NA	NA	NA	NA	NA	NA	NA	NA	NA	Up	1.18289e+07	1.29215e+07	8.96192e+06	1.10048e+07	1.40398e+07	3.49281e+07	8.42881e+06	1.99825e+07	1.19929e+07	1.60549e+07	2.45195e+07	2.25482e+07	1.7012e+07	2.42225e+07	4.31038e+07	3.20286e+07	3.5405e+07	3.79276e+07	4.6141e+07	5.29241e+07	7.85399e+07	3.62714e+07	5.46412e+07	4.75929e+07	2.0016	0.00913754	0.112674	1.14716
0.66_299.12155	LL200+HS:L200	NEG	0.66	299.122	C15 H17 N5 S	pentiapine	0.00108362	3.62268	NA	level4	ChemSpider	NA	NA	NA	NA	NA	NA	NA	NA	NA	Down	3.38293e+07	3.20224e+07	3.84337e+07	3.12234e+07	2.64566e+07	2.07437e+07	2.91903e+07	2.63709e+07	3.52883e+07	4.14013e+07	4.62716e+07	2.4701e+07	2.11424e+07	1.86276e+07	2.13433e+07	3.05317e+07	2.95839e+07	3.43486e+07	2.30399e+07	1.85792e+07	2.15408e+07	1.86917e+07	2.80084e+07	1.31566e+07	0.565788	0.00130011	0.0494288	1.06167
0.662_160.08476	LL200+HS:L200	NEG	0.662	160.085	C6 H12 N2 O3	Daminozide	-3.65e-05	-0.227964	NA	level4	ChemSpider	NA	NA	NA	NA	NA	NA	NA	NA	NA	Down	1.42283e+06	1.87301e+06	2.44183e+06	2.66876e+06	1.88352e+06	900063	2.84843e+06	2.22e+06	2.79469e+06	5.84883e+06	2.9654e+06	1.09132e+06	1.20803e+06	1.40211e+06	1.60421e+06	1.25682e+06	1.67369e+06	1.54416e+06	1.33709e+06	756184	1.21297e+06	699255	747254	913600	0.352307	0.00789302	0.110186	1.25729
0.666_326.13252	LL200+HS:L200	NEG	0.666	326.133	C20 H19 F O3	3-(4-Fluorophenyl)-2,2,4-trimethyl-2H-chromen-7-yl acetate	0.000697156	2.13765	NA	level4	ChemSpider	NA	NA	NA	NA	NA	NA	NA	NA	NA	Down	7.10876e+06	7.23236e+06	9.75618e+06	9.34224e+06	8.40365e+06	5.79299e+06	9.37336e+06	8.71835e+06	1.0676e+07	1.29891e+07	1.46998e+07	5.74796e+06	6.16248e+06	4.94901e+06	6.41423e+06	5.25855e+06	5.88947e+06	8.79187e+06	5.26082e+06	4.2489e+06	5.21679e+06	5.73294e+06	5.52216e+06	3.96061e+06	0.513546	0.0145583	0.128575	1.00751
0.668_176.07965	LL200+HS:L200	POS	0.668	176.08	C6 H12 N2 O4	ala-ser	-6.1e-05	-0.346662	NA	level4	ChemSpider	NA	NA	NA	NA	NA	NA	NA	NA	NA	Down	2.44851e+06	2.73995e+06	6.86935e+06	5.44427e+06	3.47291e+06	9.90962e+06	3.90451e+06	3.09572e+06	4.98767e+06	7.79508e+06	4.87324e+06	3.39035e+06	3.15499e+06	3.57182e+06	5.0813e+06	5.03111e+06	5.09576e+06	8.31088e+06	1.9297e+06	1.82172e+06	2.17215e+06	1.91899e+06	4.57697e+06	1.51094e+06	0.385953	0.000576345	0.0299991	1.42388
0.67_190.09533	LL200+HS:L200	NEG	0.67	190.095	C7 H14 N2 O4	meso-2,6-Diaminopimelic acid	-2.57e-05	-0.135319	NA	level4	ChemSpider	NA	NA	NA	NA	NA	NA	NA	NA	NA	Down	1.22833e+06	2.05855e+06	4.64014e+06	6.74549e+06	4.18577e+06	1.75836e+06	5.50613e+06	3.65557e+06	5.79815e+06	1.10367e+07	5.95161e+06	824815	1.05296e+06	861101	1.2991e+06	1.17973e+06	1.70137e+06	1.61501e+06	485821	905425	1.16943e+06	1.21149e+06	1.32816e+06	795399	0.216099	0.017753	0.135354	1.41762
0.67_247.06901	LL200+HS:L200	POS	0.67	247.069	C9 H13 N O7	N(2)-succinyl-L-glutamic acid	-0.0001898	-0.768204	NA	level4	ChemSpider	NA	NA	NA	NA	NA	NA	NA	NA	NA	Up	5.36254e+06	6.40186e+06	4.82948e+06	5.81709e+06	5.32084e+06	5.52816e+06	5.05223e+06	7.85644e+06	3.88059e+06	6.05885e+06	6.47462e+06	5.83286e+06	2.16567e+06	3.56118e+06	1.03534e+07	6.03292e+06	8.28864e+06	6.49741e+06	9.52991e+06	1.37708e+07	1.9226e+07	6.63607e+06	1.34369e+07	1.19748e+07	2.00291	0.00492959	0.0973982	1.10467
0.672_248.02981	LL200+HS:L200	POS	0.672	248.03	C10 H7 F3 O4	Triflusal	0.000171196	0.690222	NA	level4	ChemSpider	NA	NA	NA	NA	NA	NA	NA	NA	NA	Up	9.41441e+06	8.49631e+06	9.09509e+06	4.91929e+06	7.20003e+06	3.46653e+06	5.04987e+06	8.2737e+06	3.66015e+06	7.10717e+06	1.04342e+07	2.21347e+07	2.22372e+07	2.40196e+07	2.24568e+07	1.94961e+07	2.49814e+07	1.93373e+07	2.89732e+07	3.89839e+07	4.2164e+07	3.24342e+07	3.19979e+07	4.1849e+07	2.54542	0.0128189	0.125681	1.427
0.673_232.05586	LL200+HS:L200	POS	0.673	232.056	C13 H12 O2 S	(2Z)-3-{5-[(4Z)-5-(Methylsulfanyl)-4-penten-2-yn-1-yl]-2-furyl}acrylaldehyde	5.5e-05	0.236897	NA	level4	ChemSpider	NA	NA	NA	NA	NA	NA	NA	NA	NA	Up	5.58745e+06	5.12036e+06	6.68035e+06	3.78323e+06	6.73135e+06	2.89677e+06	4.02846e+06	7.57757e+06	2.80624e+06	3.12539e+06	7.94093e+06	2.75138e+07	2.94647e+07	2.13055e+07	1.18775e+07	1.48266e+07	1.30798e+07	1.32295e+07	1.69534e+07	2.56041e+07	2.84975e+07	2.64279e+07	1.47295e+07	2.77467e+07	2.54432	0.0138609	0.127961	1.39033
0.674_275.14768	LL200+HS:L200	POS	0.674	275.148	C11 H21 N3 O5	epsilon-(gamma-Glutamyl)-lysine	-0.000440405	-1.60061	NA	level4	ChemSpider	NA	NA	NA	NA	NA	NA	NA	NA	NA	Down	1.46235e+07	1.97249e+07	3.08533e+07	2.14634e+07	1.80236e+07	1.03513e+07	1.88211e+07	1.17456e+07	2.21386e+07	3.03838e+07	1.72643e+07	5.88607e+06	6.54589e+06	6.49664e+06	7.77745e+06	7.20305e+06	9.02837e+06	1.14028e+07	6.88848e+06	5.31556e+06	9.24684e+06	9.05141e+06	1.56346e+06	6.13375e+06	0.392108	0.0229011	0.146031	1.15723
0.675_260.13689	LL200+HS:L200	POS	0.675	260.137	C11 H20 N2 O5	L-gamma-Glutamyl-L-leucine	-0.000328506	-1.26282	NA	level4	ChemSpider	NA	NA	NA	NA	NA	NA	NA	NA	NA	Down	6.85199e+06	3.98363e+07	7.2615e+06	1.09246e+07	3.2004e+07	721099	13096675	1.89558e+07	5.42179e+07	4.67097e+07	5.44347e+07	1.05914e+07	6.27718e+06	1.62848e+07	9.89546e+06	2.26334e+07	2.41754e+07	3.09348e+07	2.77859e+07	1.09837e+07	2.68913e+07	1.06912e+07	1.37317e+07	1.71117e+07	0.459857	0.00792219	0.110186	1.15721
0.676_218.09010	LL200+HS:L200	POS	0.676	218.09	C8 H14 N2 O5	MFCD00037215	-0.000175441	-0.804443	NA	level4	ChemSpider	NA	NA	NA	NA	NA	NA	NA	NA	NA	Down	3.83276e+06	3.14327e+06	5.54076e+06	6.85482e+06	4.96602e+06	9.33814e+06	5.35749e+06	5.64981e+06	6.07578e+06	1.01301e+07	8.79739e+06	4.51956e+06	4.16011e+06	3.19036e+06	3.67216e+06	3.6262e+06	4.51523e+06	7.04682e+06	2.01886e+06	3.64504e+06	1.6853e+06	3.51747e+06	5.18319e+06	1.10723e+06	0.426884	0.010475	0.118983	1.24041
0.676_261.08513	LL200+HS:L200	POS	0.676	261.085	C10 H15 N O7	Hymexazol O-glucoside	0.000280436	1.07412	NA	level4	ChemSpider	NA	NA	NA	NA	NA	NA	NA	NA	NA	Up	6.48616e+06	13336656	4.96034e+06	8.11602e+06	8.72055e+06	1.77277e+07	7.6281e+06	1.03561e+07	8.47216e+06	1.37921e+07	1.44107e+07	1.85036e+07	9.27339e+06	1.67958e+07	2.52953e+07	3.00929e+07	2.81172e+07	2.66688e+07	3.33973e+07	3.31222e+07	4.84863e+07	2.41512e+07	4.39804e+07	3.38422e+07	1.78505	0.0247211	0.150095	1.02274
0.677_258.12160	LL200+HS:L200	POS	0.677	258.122	C11 H18 N2 O5	1-(4-Amino-4-carboxybutanoyl)-2-piperidinecarboxylic acid	2.42e-05	0.0937385	NA	level4	ChemSpider	NA	NA	NA	NA	NA	NA	NA	NA	NA	Down	1.46235e+07	1.97249e+07	3.08533e+07	2.14634e+07	1.80236e+07	1.03513e+07	1.88211e+07	1.17456e+07	2.21386e+07	3.03838e+07	1.72643e+07	5.88607e+06	6.54589e+06	6.49664e+06	7.77745e+06	7.20305e+06	9.02837e+06	1.14373e+07	6.88848e+06	5.31556e+06	9.24684e+06	9.05141e+06	7.8359e+06	6.13375e+06	0.456331	0.0286159	0.156458	1.01253
0.68_247.14185	LL200+HS:L200	POS	0.68	247.142	C11 H21 N O5	3-hydroxybutyrylcarnitine	-0.000118035	-0.477599	NA	level4	ChemSpider	NA	NA	NA	NA	NA	NA	NA	NA	NA	Up	2.50826e+06	1.70013e+07	1.85633e+07	6.85837e+06	9.5854e+06	1.04915e+07	7.82245e+06	1.13845e+07	4.64635e+06	8.03248e+06	4.16226e+06	2.94722e+07	3.7319e+07	32815800	3.955e+07	4.73247e+07	1.88785e+07	3.14595e+07	9.60664e+07	6.59199e+07	8.22003e+07	7.58412e+07	5.48534e+07	5.06235e+07	3.71607	0.00870354	0.111935	1.77237
0.681_234.08480	LL200+HS:L200	POS	0.681	234.085	C8 H14 N2 O6	glu-ser	-0.000387709	-1.65627	NA	level4	ChemSpider	NA	NA	NA	NA	NA	NA	NA	NA	NA	Down	1.00303e+07	8.23768e+06	7.70852e+06	9.36867e+06	8.65425e+06	2.55883e+07	6.9418e+06	8.06204e+06	8.23147e+06	1.31542e+07	9.21198e+06	3.52447e+06	4.49693e+06	3.32805e+06	2.19988e+06	3.05273e+06	4.35317e+06	5.97119e+06	1.08164e+06	2.67628e+06	3.87221e+06	3.1104e+06	4.87126e+06	2.82352e+06	0.419225	0.0183416	0.136225	1.13977
0.689_426.08767	LL200+HS:L200	POS	0.689	426.088	C13 H22 N4 O8 S2	Cysteine-glutathione disulfide	-0.000231574	-0.543489	NA	level4	ChemSpider	NA	NA	NA	NA	NA	NA	NA	NA	NA	Down	38563469	4.07703e+07	2.99988e+07	5.57497e+07	4.56809e+07	6.26422e+07	5.07916e+07	4.02022e+07	6.57328e+07	5.57239e+07	3.7921e+07	1.5938e+07	2.2818e+07	9.67347e+06	1.48946e+07	1.42739e+07	1.80427e+07	4.67396e+07	2.00667e+07	1.8092e+07	1.81221e+07	1.77158e+07	1.22919e+07	1.29056e+07	0.416023	0.0307676	0.15789	1.08669
0.692_94.05306	LL200+HS:L200	NEG	0.692	94.0531	C5 H6 N2	4-Aminopyridine	-4.1e-05	-0.435707	NA	level4	ChemSpider	NA	NA	NA	NA	NA	NA	NA	NA	NA	Down	1.60281e+06	1.4996e+06	2.64332e+06	2.20356e+06	1.57479e+06	861970	1.9647e+06	520704	1.13134e+06	3.34067e+06	2.37124e+06	310242	223924	145144	615335	465261	352505	313983	163589	155994	412963	348947	190989	158335	0.179413	0.0184003	0.136225	1.45461
0.693_169.07422	LL200+HS:L200	POS	0.693	169.074	C8 H11 N O3	noradrenaline	0.000322841	1.90946	NA	level4	ChemSpider	NA	NA	NA	NA	NA	NA	NA	NA	NA	Down	7.68939e+06	1.70984e+07	2.94583e+07	2.70727e+07	2.41197e+07	8.33871e+06	2.36562e+07	1.90108e+07	3.01628e+07	9.07903e+06	4.26149e+07	5.6041e+06	5.14733e+06	7.58198e+06	2.63684e+06	7.20565e+06	1.5867e+07	1.53983e+07	4.16401e+06	1.0213e+07	6.21221e+06	5.66666e+06	1.09044e+07	5.36868e+06	0.353443	0.0216256	0.143556	1.24016
0.693_351.11848	LL200+HS:L200	NEG	0.693	351.118	C12 H22 N3 O7 P	N-Acetyldemethylphosphinothricin tripeptide	-0.00105368	-3.0009	NA	level4	ChemSpider	NA	NA	NA	NA	NA	NA	NA	NA	NA	Up	1.88379e+06	1.7995e+06	1.48481e+06	167191	211865	2.16944e+06	911553	610117	1.46724e+06	1.82651e+06	1.81652e+06	4.88232e+06	638237	2.15863e+06	5.2171e+06	2.71693e+06	927007	1.20942e+06	6.13601e+06	5.73497e+06	5.52865e+06	5.65708e+06	5.48321e+06	4.8604e+06	3.35222	0.000307761	0.0201895	1.67665
0.694_199.08434	LL200+HS:L200	POS	0.694	199.084	C9 H13 N O4	N-3-oxo-pentanoyl-L-Homoserine lactone	-0.000117468	-0.590041	NA	level4	ChemSpider	NA	NA	NA	NA	NA	NA	NA	NA	NA	Down	911166	5.62836e+06	1.18538e+07	8.51145e+06	1.10966e+07	2.64933e+06	1.0626e+07	9.08068e+06	1.31645e+07	1.67186e+07	1.9825e+07	1.77132e+06	595890	1.26911e+06	1.57116e+06	1.42434e+06	3.41475e+06	4.45134e+06	1.12457e+06	855324	869173	941505	1.28675e+06	903720	0.101376	0.00601575	0.104104	1.91749
0.695_172.08470	LL200+HS:L200	NEG	0.695	172.085	C7 H12 N2 O3	MFCD03547962	-9.18e-05	-0.533423	NA	level4	ChemSpider	NA	NA	NA	NA	NA	NA	NA	NA	NA	Down	2.11832e+06	2.66105e+06	3.56837e+06	3.92781e+06	2.83797e+06	1.71209e+06	3.41749e+06	2.76661e+06	3.88213e+06	5.81244e+06	5.88412e+06	1.46876e+06	1.38025e+06	1.53563e+06	1.96652e+06	1.98888e+06	2.22791e+06	2.3954e+06	1.44852e+06	940912	1.90828e+06	1.68297e+06	1.83335e+06	1.37224e+06	0.413966	0.00779776	0.109924	1.17349
0.696_204.11076	LL200+HS:L200	POS	0.696	204.111	C8 H16 N2 O4	Val-Ser	-0.000251696	-1.23313	NA	level4	ChemSpider	NA	NA	NA	NA	NA	NA	NA	NA	NA	Down	2.62947e+06	3.82712e+06	1.09539e+07	10974998	6.59829e+06	6.35697e+06	1.10703e+07	9.30534e+06	1.15567e+07	1.94753e+07	1.02808e+07	1.01113e+06	789106	646336	708736	775157	2.1284e+06	1.22852e+06	1.20708e+06	752992	1.31041e+06	1.01059e+06	815655	970029	0.133497	0.0487206	0.182447	1.42527
0.697_169.08478	LL200+HS:L200	NEG	0.697	169.085	C7 H11 N3 O2	N.pi.-Methyl-L-histidine	-0.000343763	-2.03307	NA	level4	ChemSpider	NA	NA	NA	NA	NA	NA	NA	NA	NA	Up	2.06659e+06	2.10812e+06	2.6476e+06	1.72803e+06	1.80732e+06	2.3566e+06	2.11755e+06	1.47482e+06	926035	2.0191e+06	1.77922e+06	1.56636e+06	2.3825e+06	2.21407e+06	2.82546e+06	883688	1.40327e+06	1.23615e+06	2.96376e+06	2.53998e+06	3.89737e+06	4.1256e+06	1.96381e+06	2.98438e+06	2.24007	0.00101706	0.0418372	1.30619
[truncated: 361 more rows]

## Sheet: DMs related to carbohydrate,
Differential metabolites (DMs) related to carbohydrate,lipid and amino acid metabolism in response to the action of LTA under HS
[truncated: 39 more rows]

[truncated: 1 more sheets: Correlation analysis]
