# Supplementary figures and images for: l-Theanine attenuates heat stress-induced proteotoxicity and alterations in carbohydrate and lipid metabolismviaheat shock factor 1
Source: Royal Society of Chemistry journal article supplement (doi:10.1039/d3fo01001e), 2023-01-01

Membrane

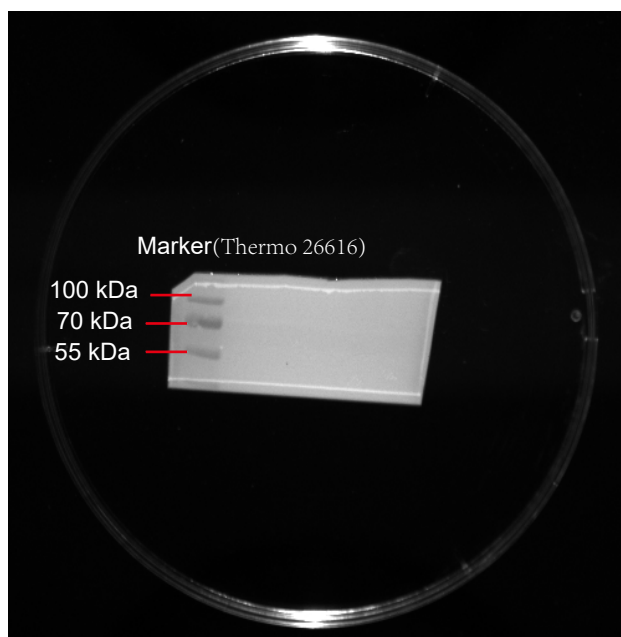

Chemi

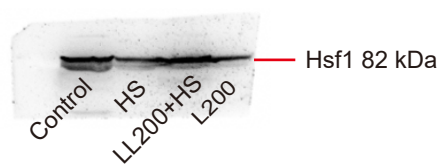

Membrane

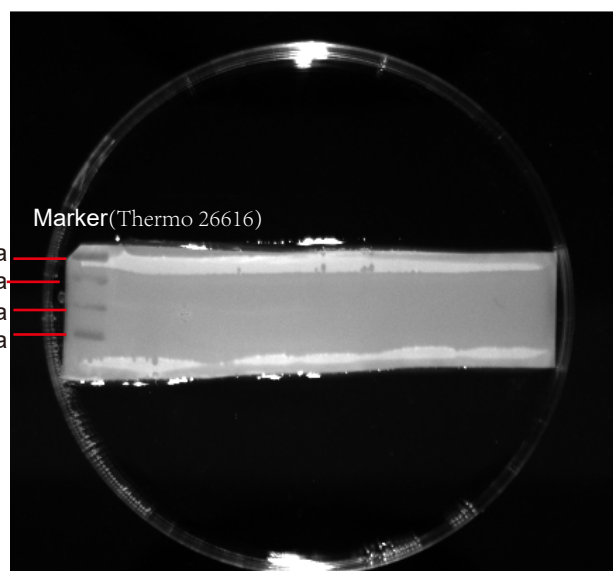

Chemi

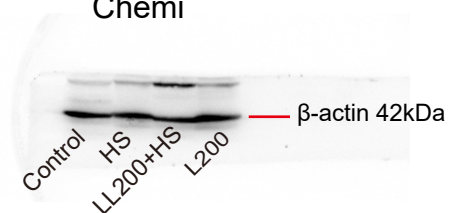

Supplement: d3fo01001e3.pdf [file d3fo01001e3.pdf]

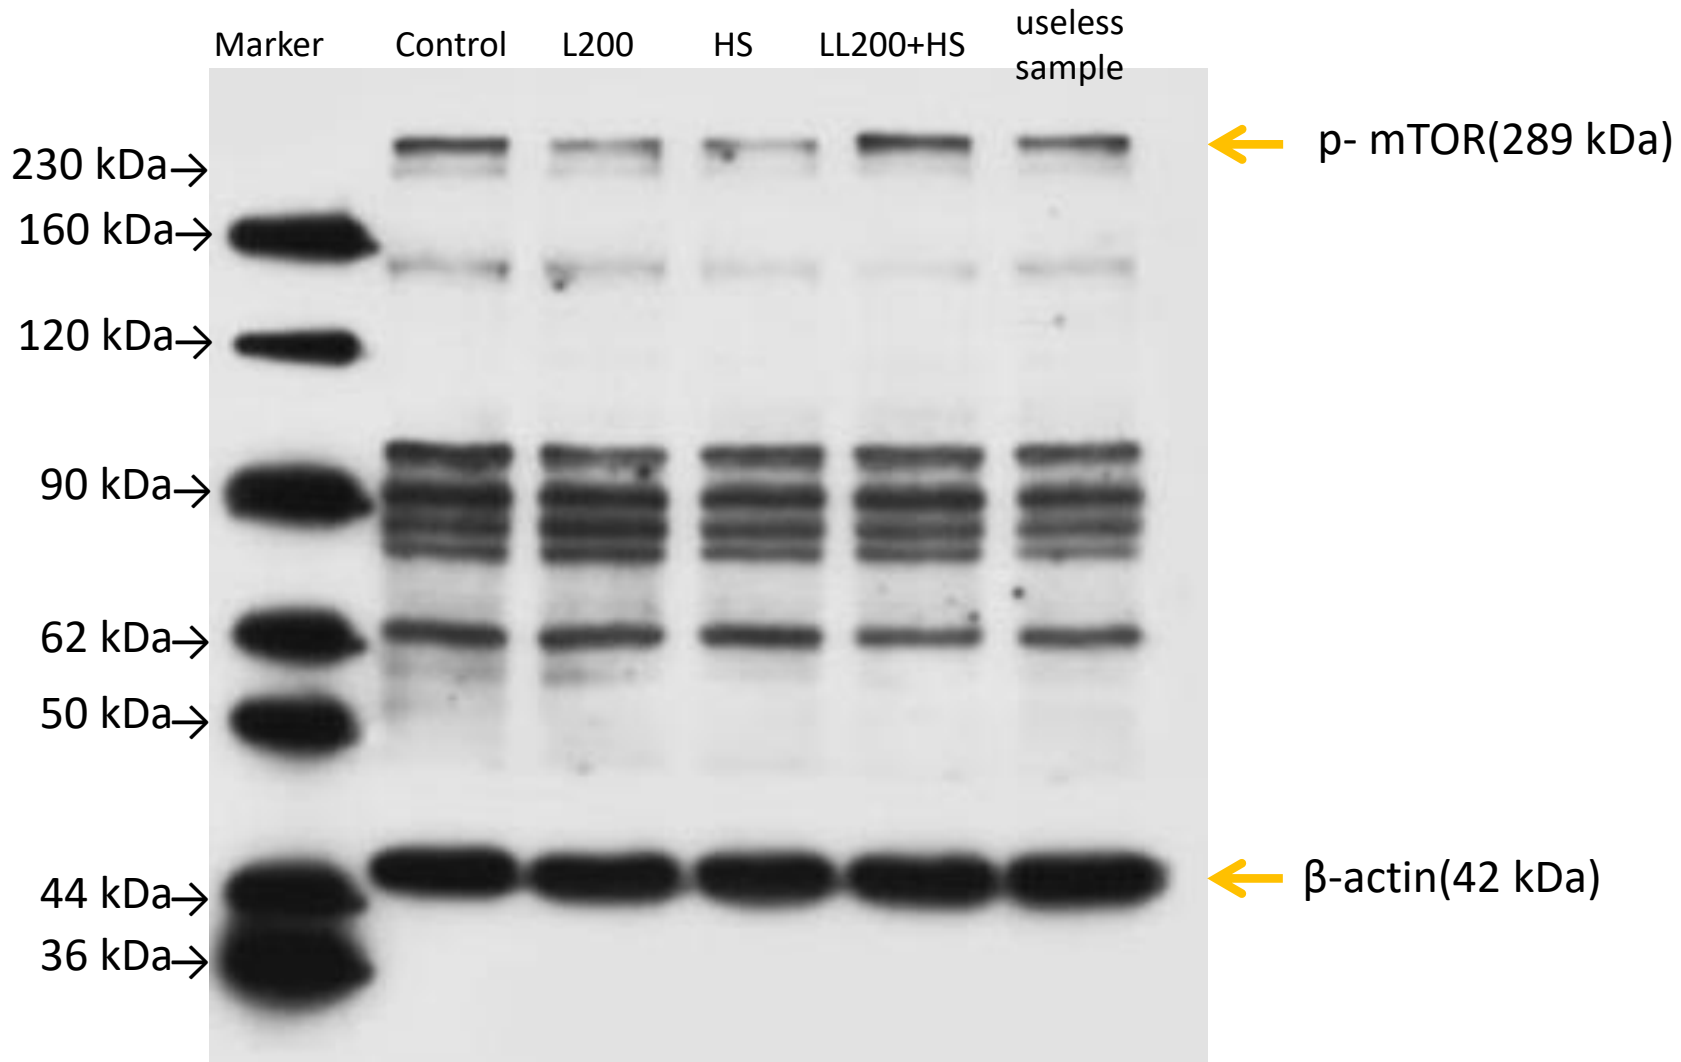

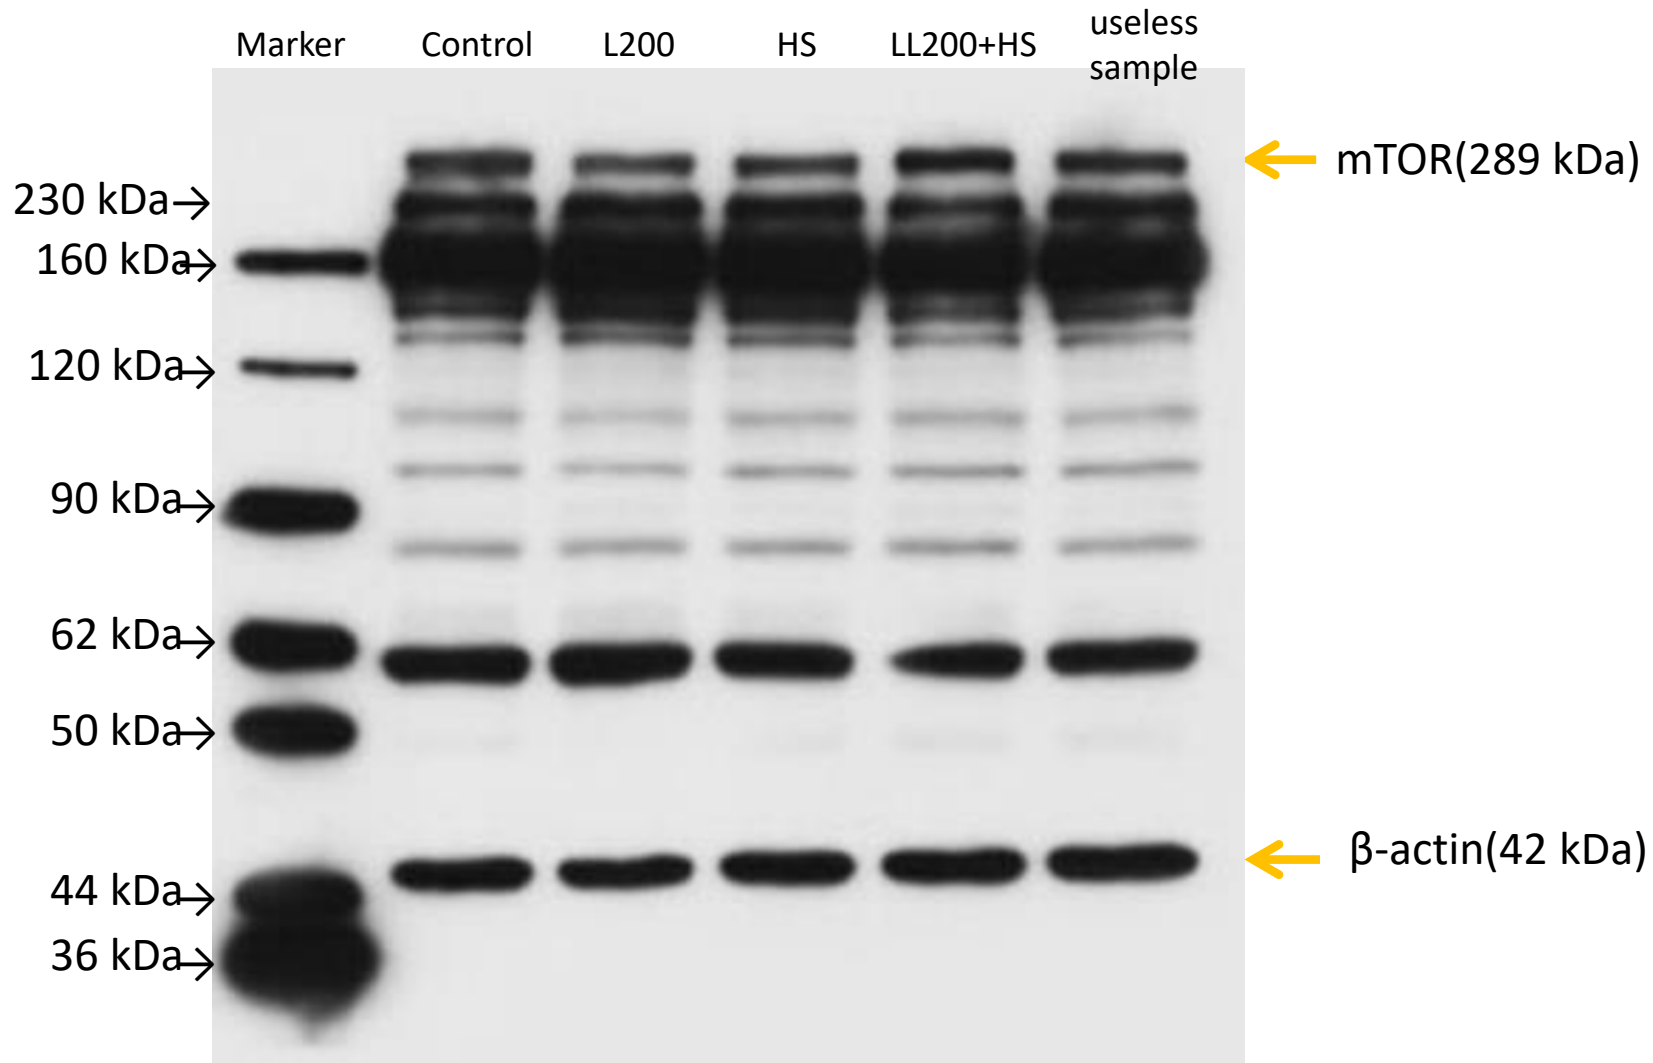

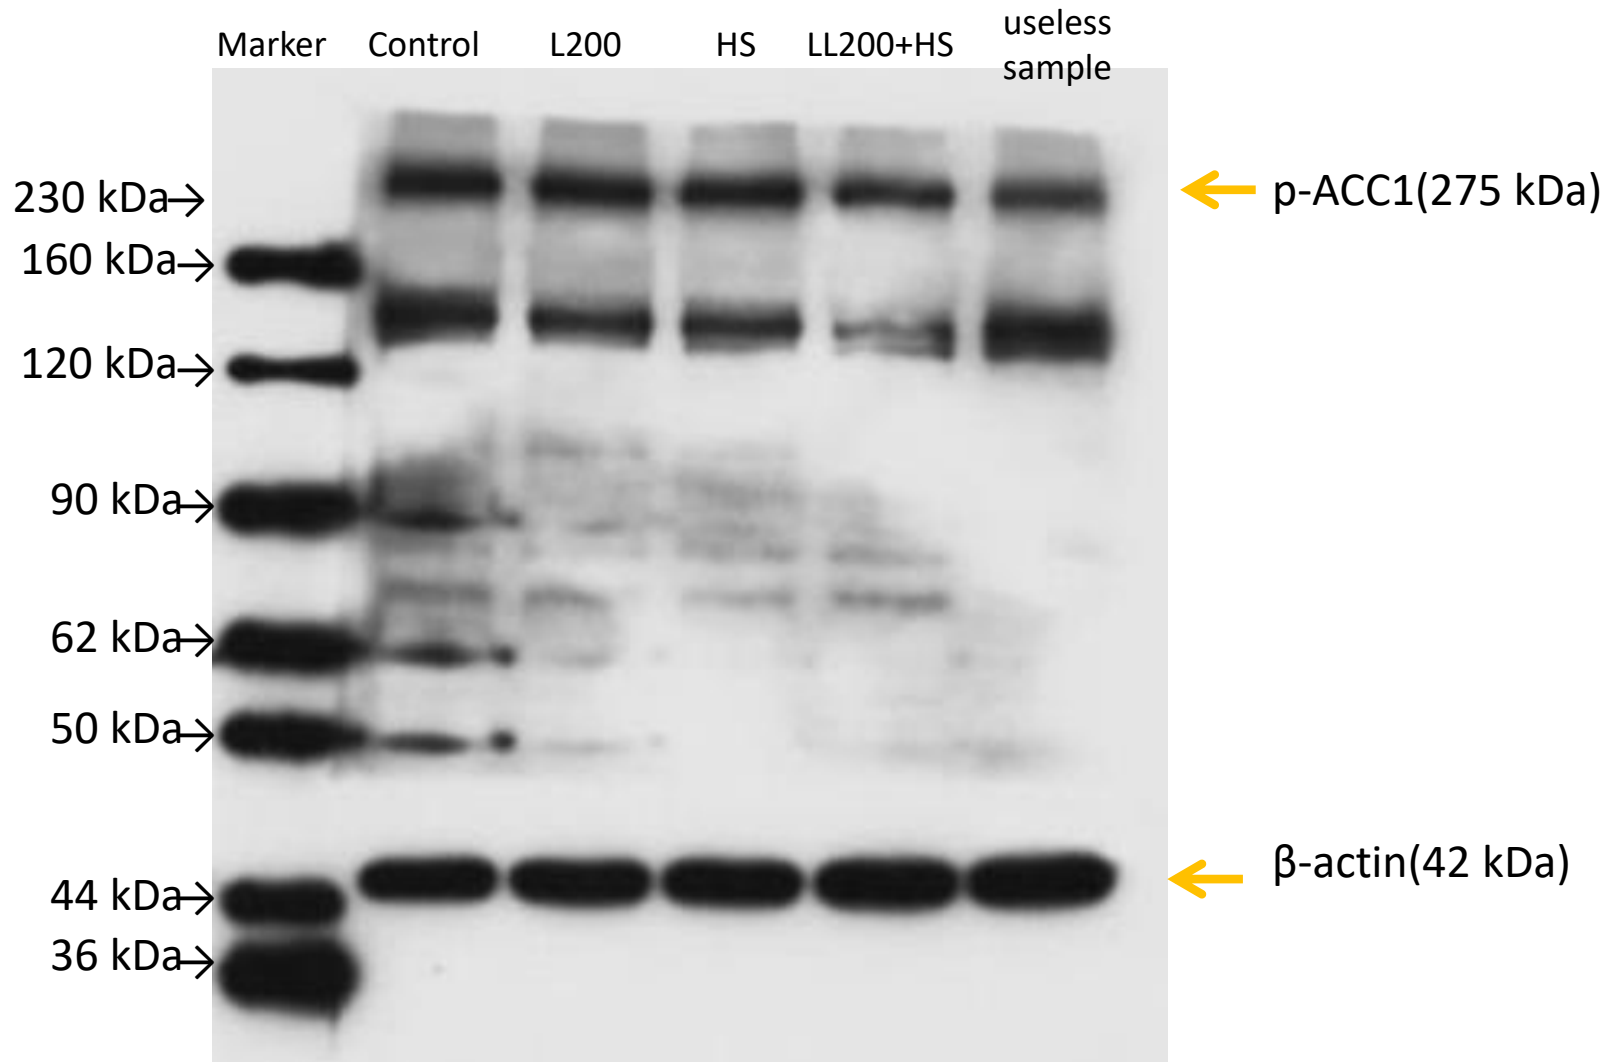

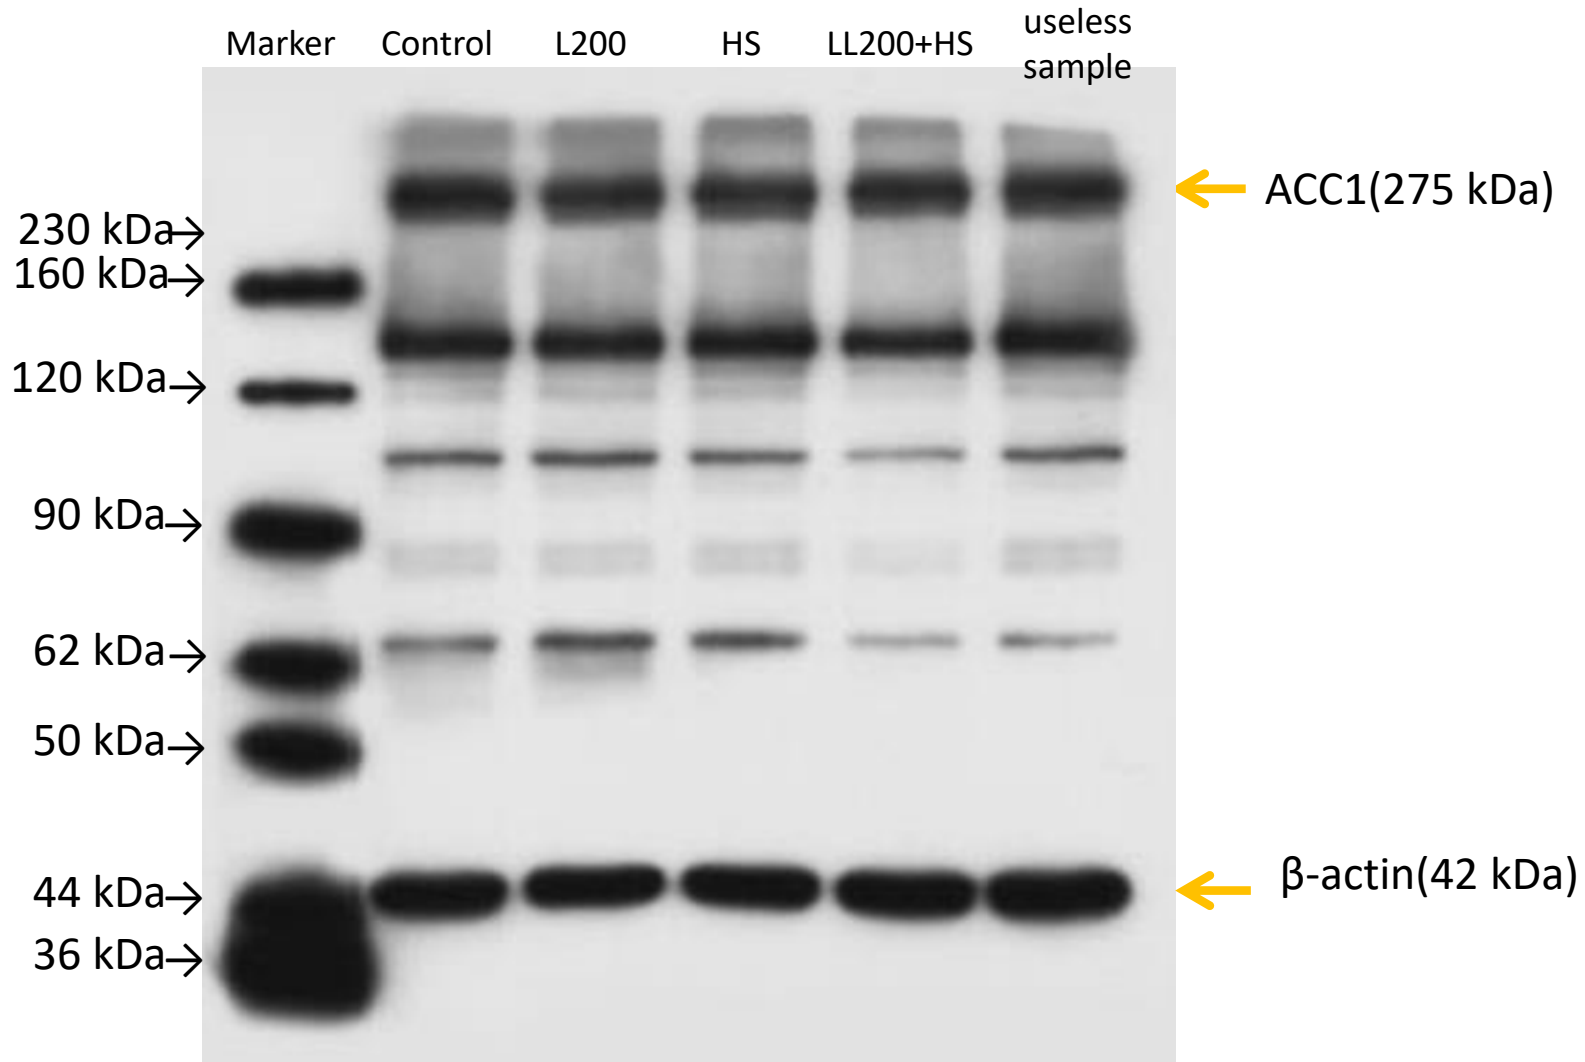

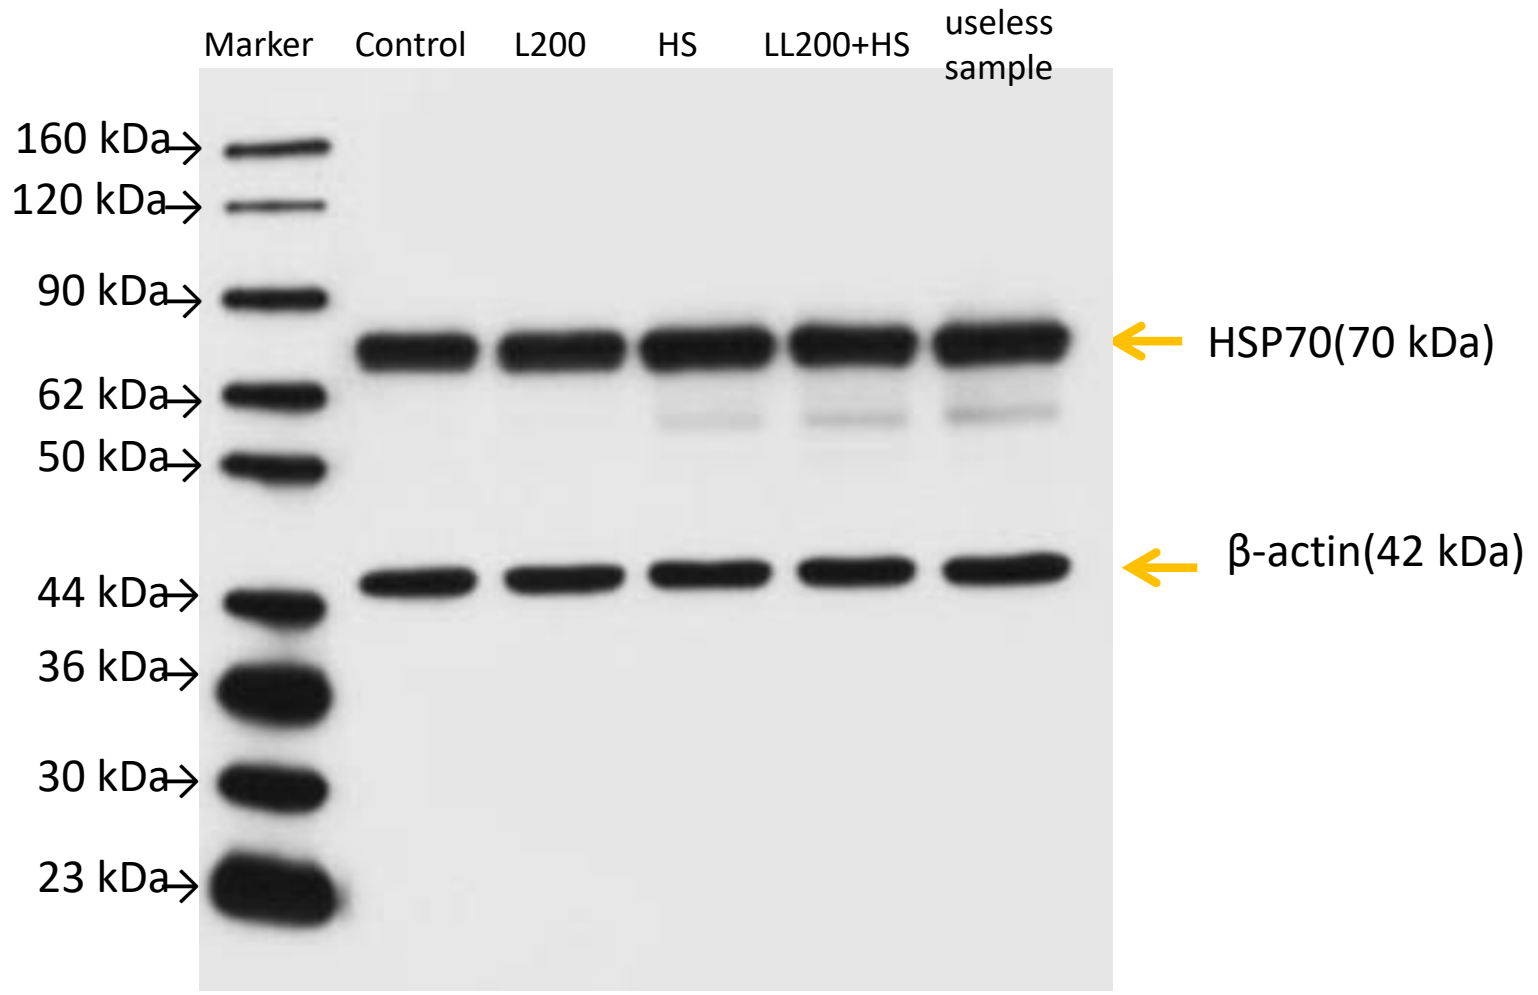

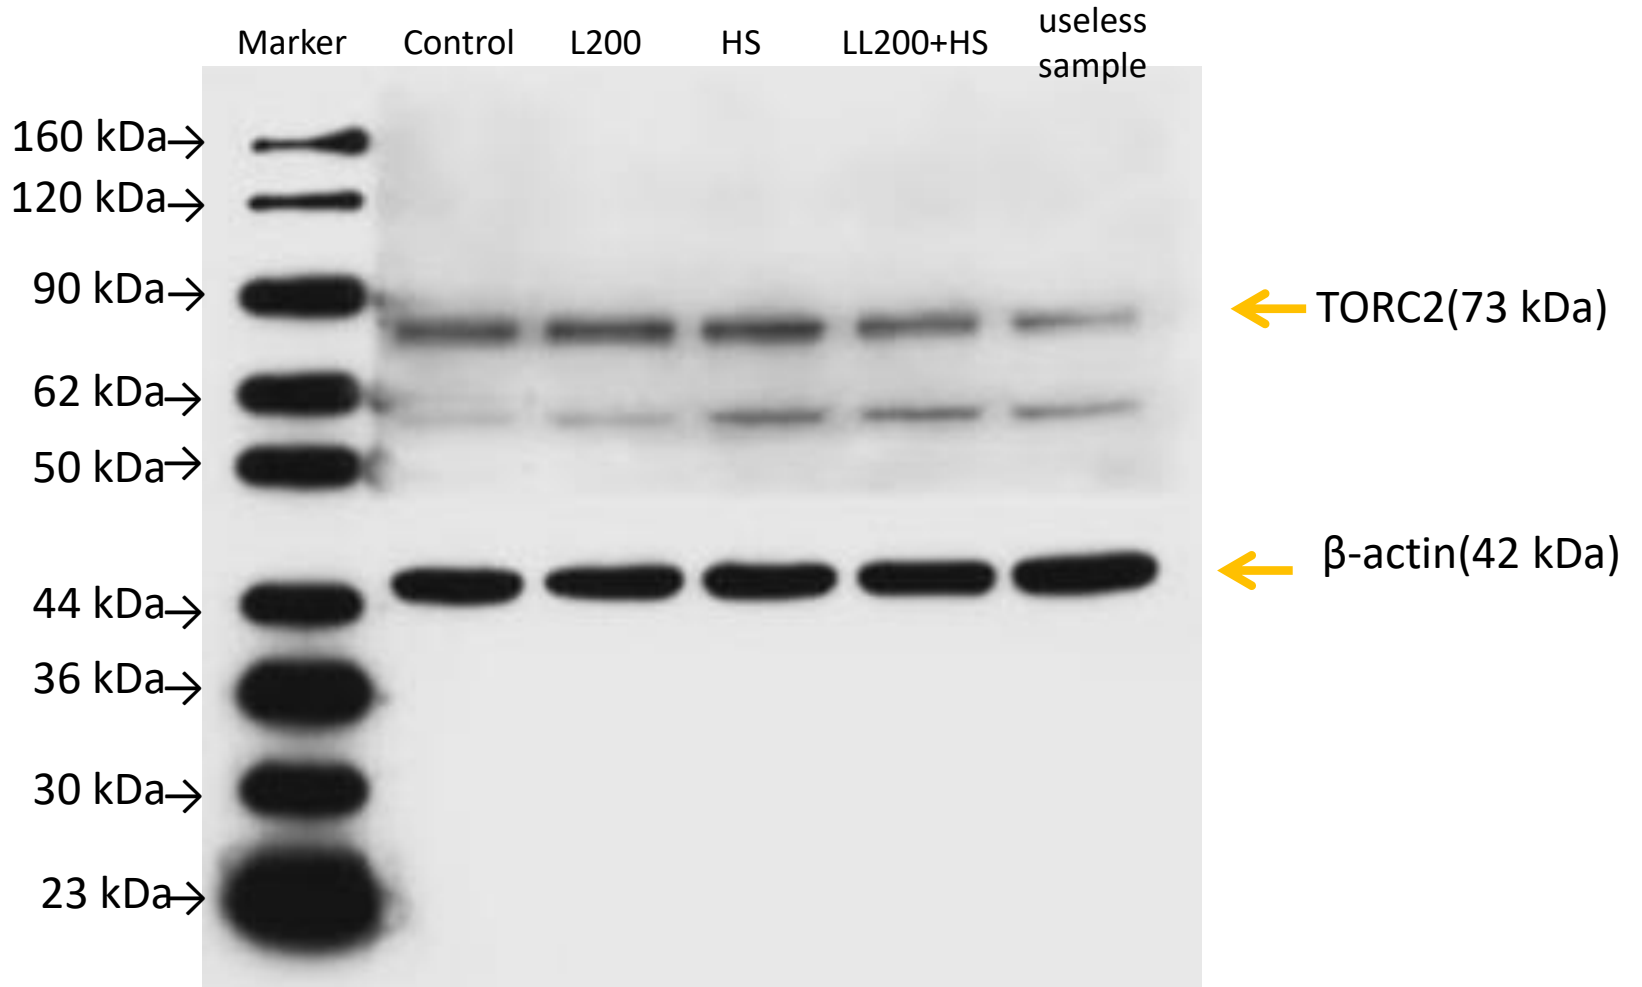

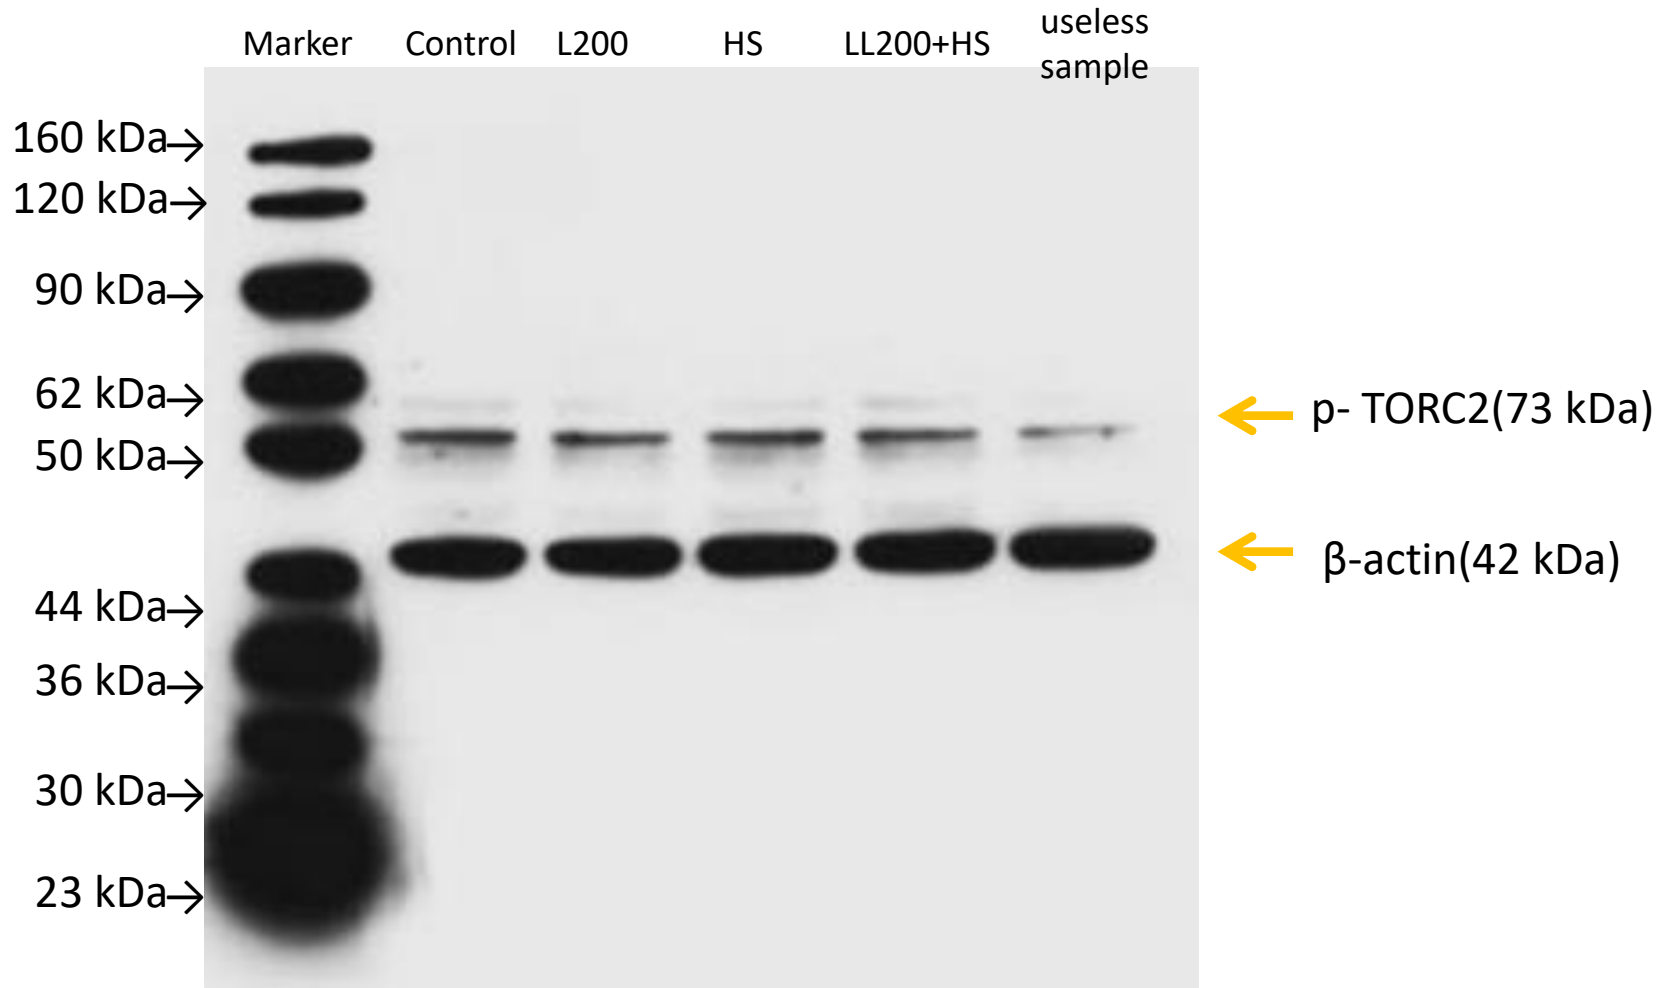

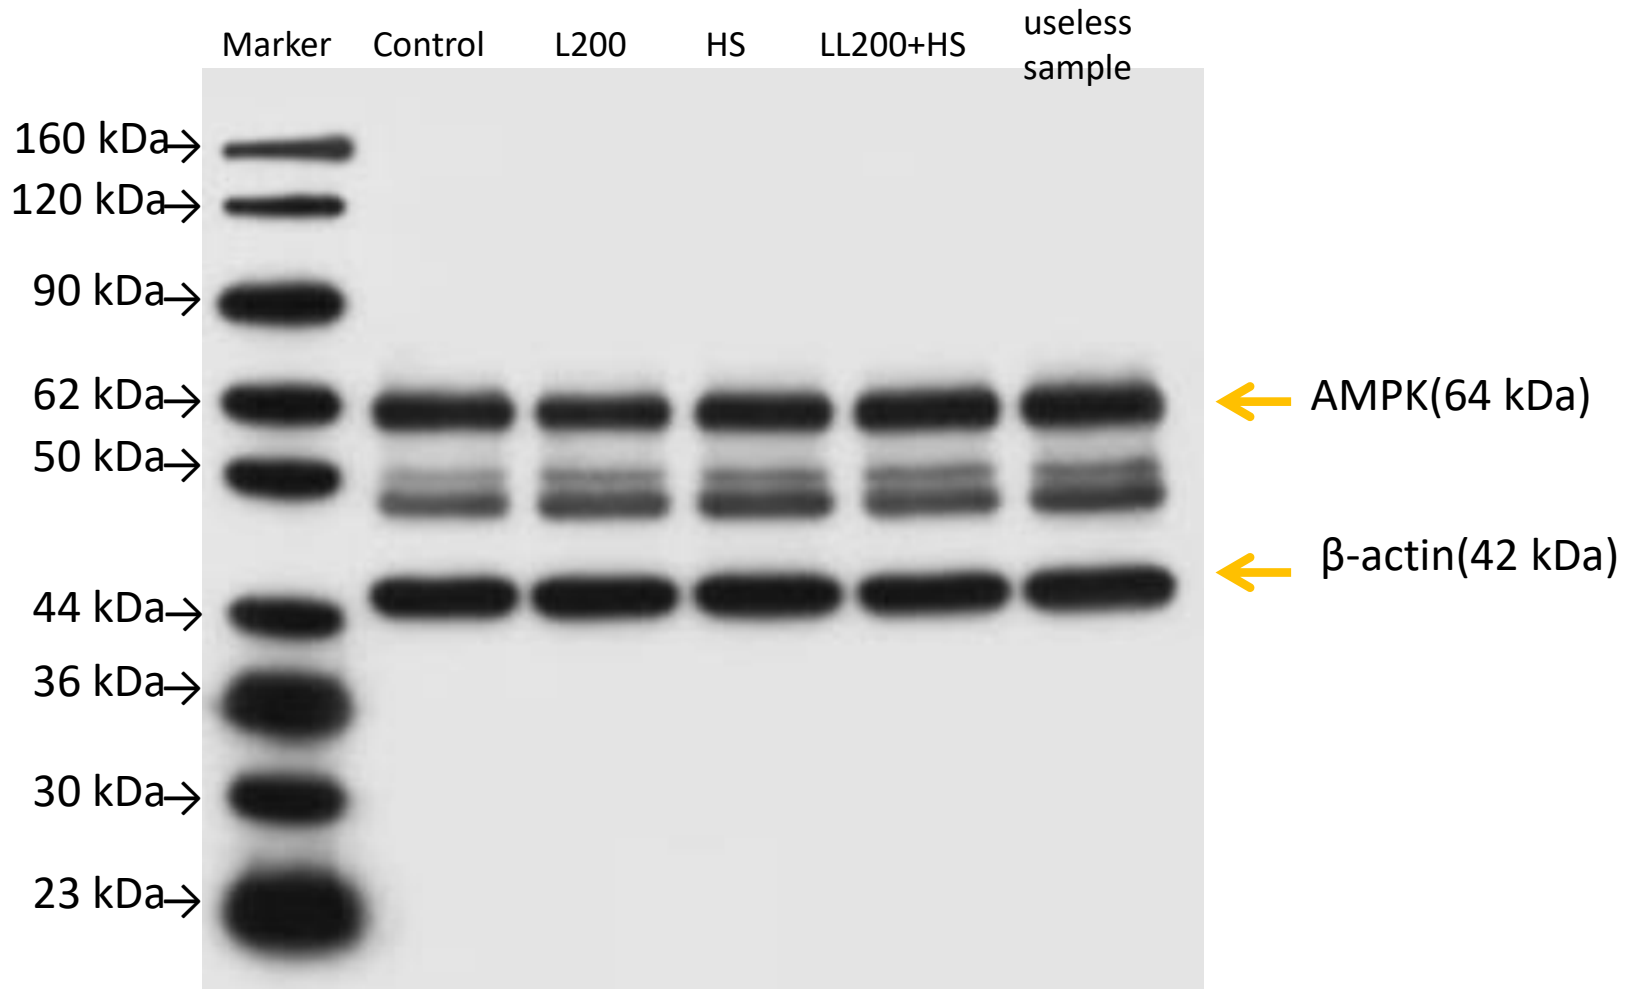



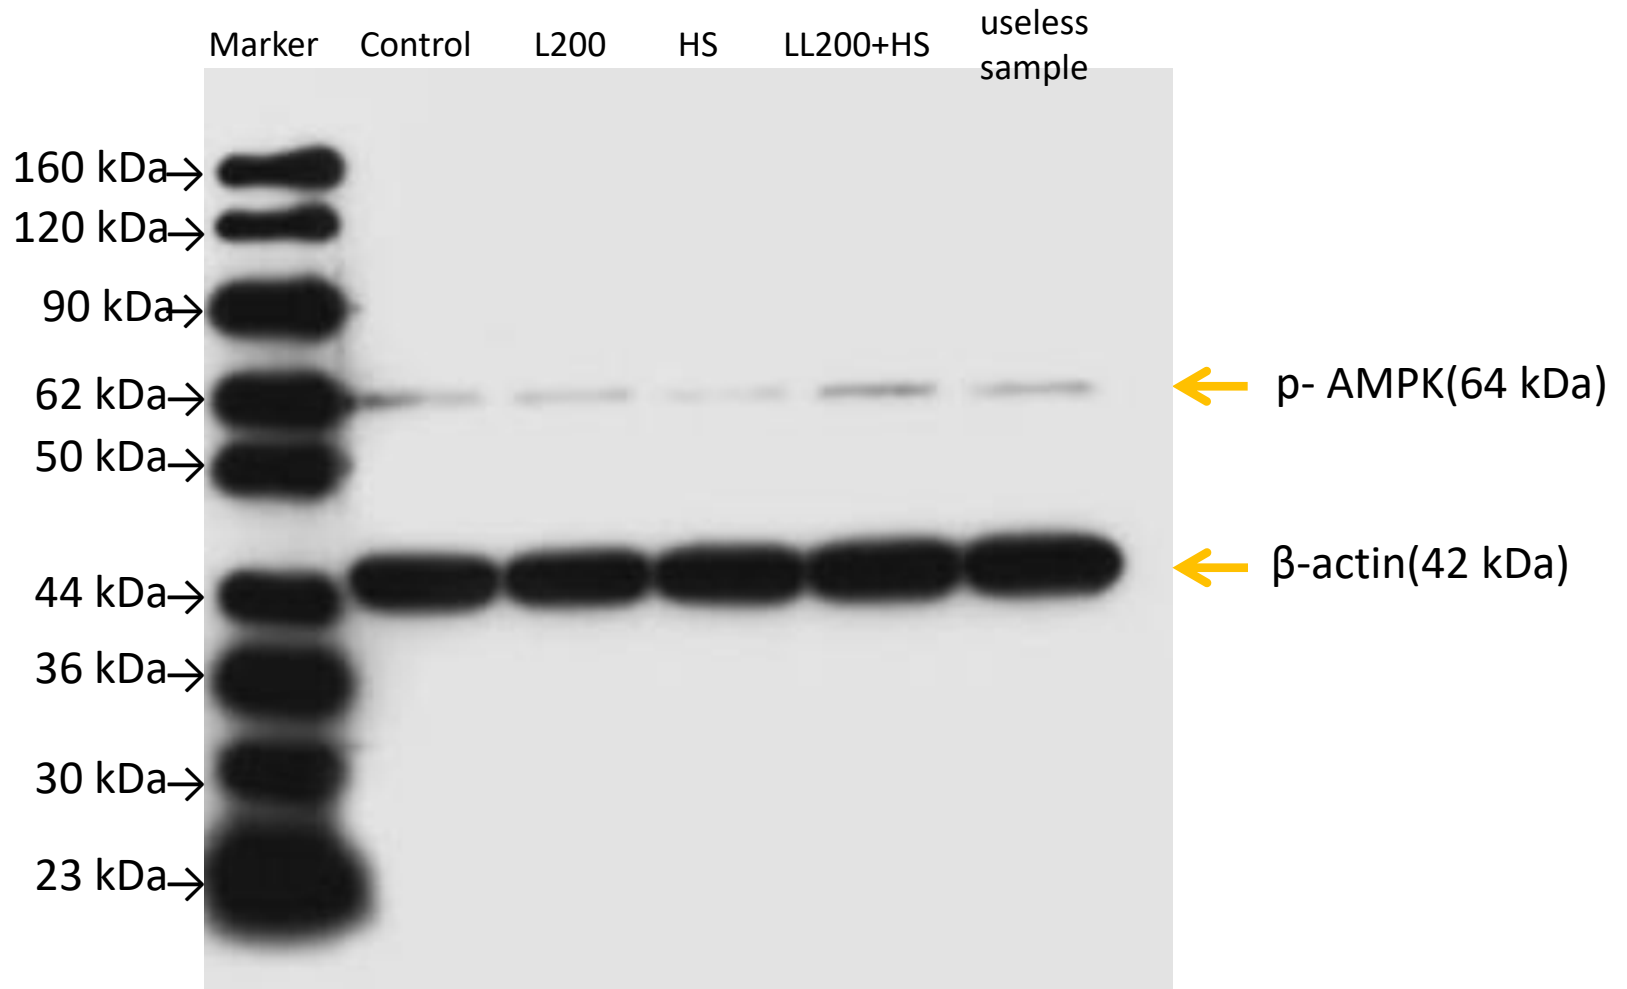

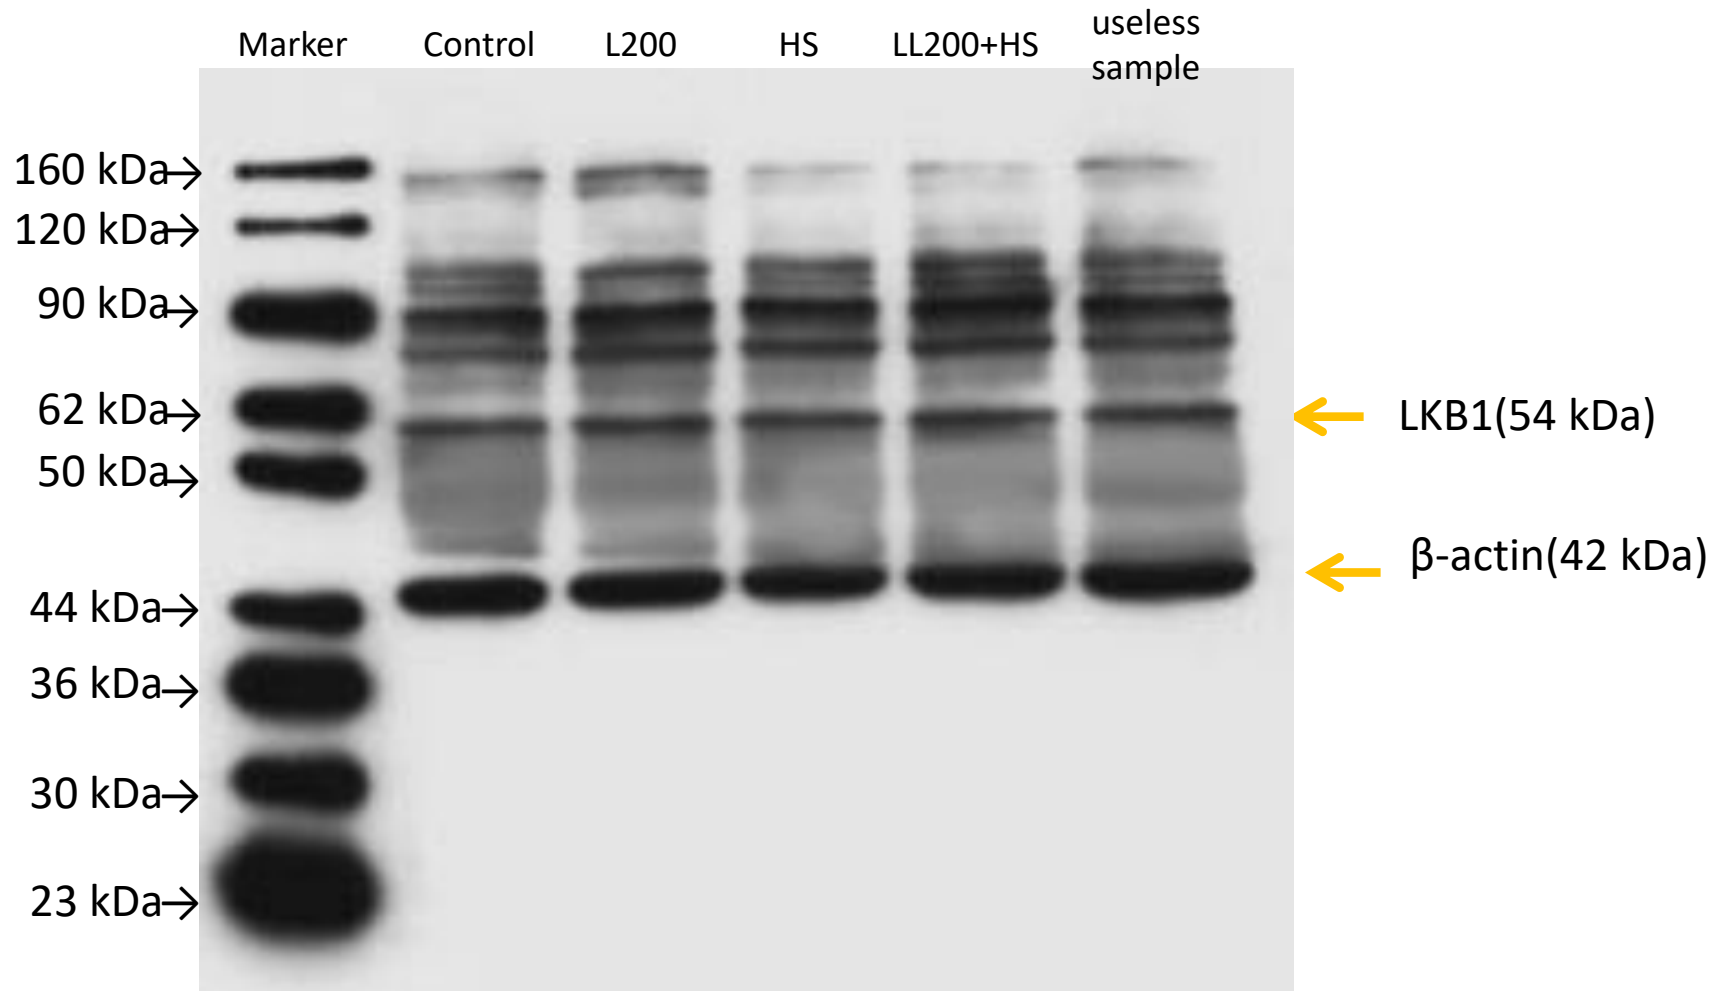

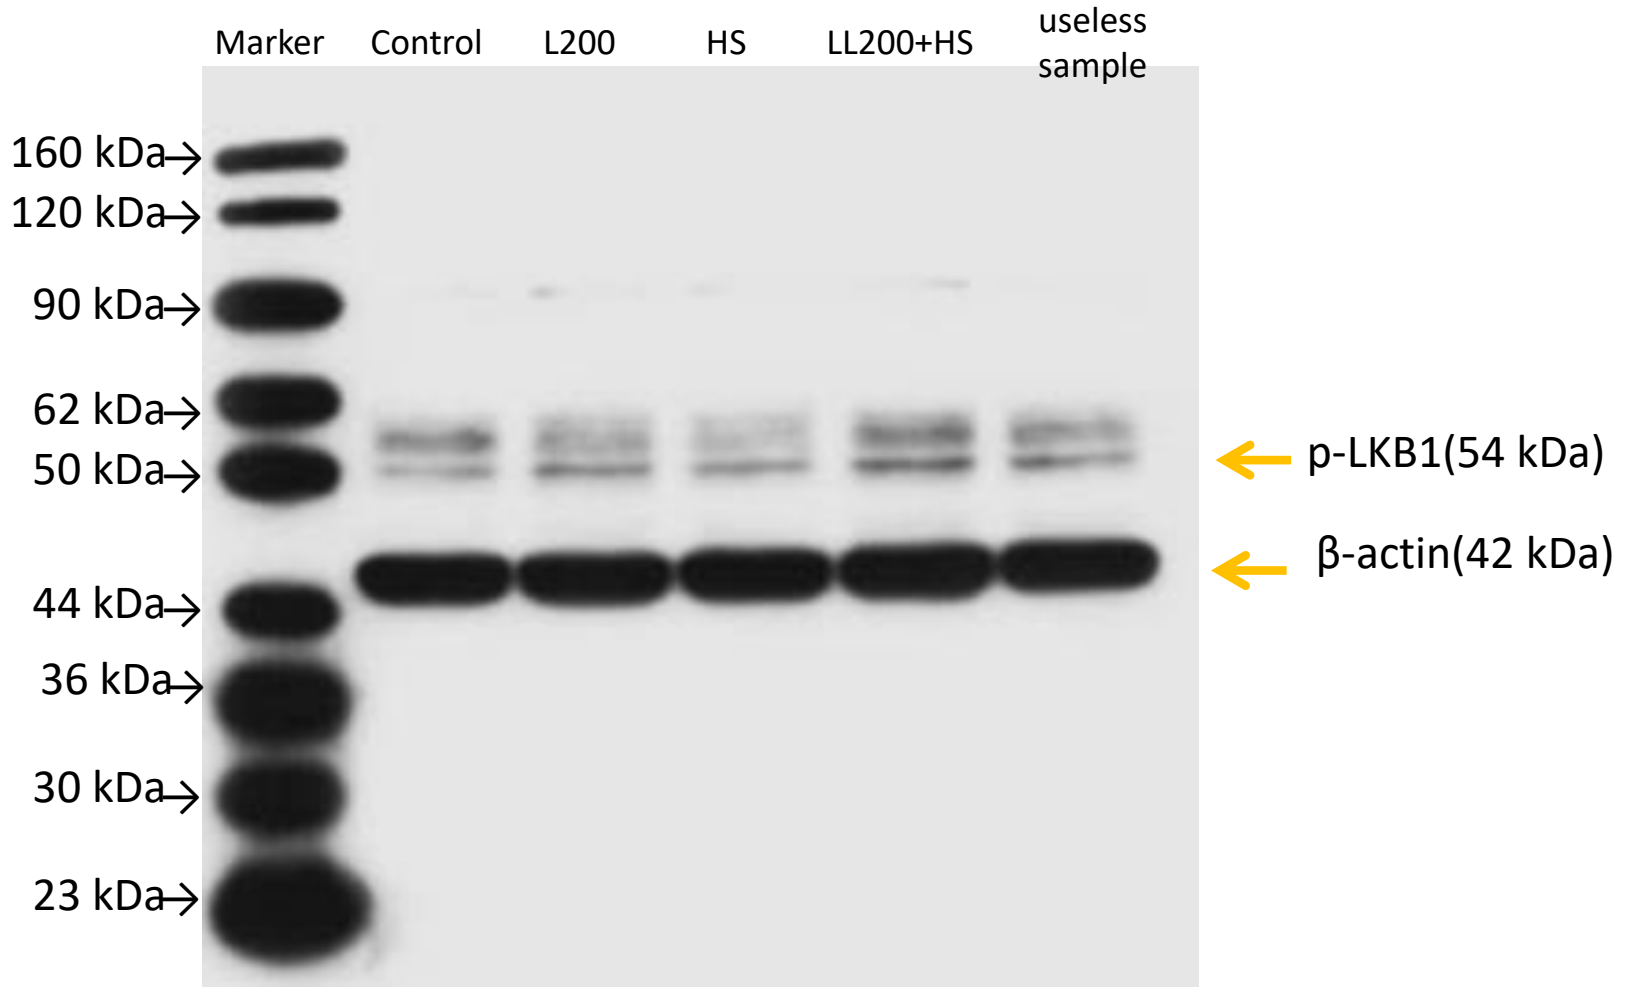

Supplement: d3fo01001e6.pdf [file d3fo01001e6.pdf]
